# Supplementary material for: A multiparametric niche-like drug screening platform in acute myeloid leukemia
Source: PubMed Central journal article supplement (PMC9232632; doi:10.1038/s41408-022-00689-3), 2022-06-24

2

3 **A MULTIPARAMETRIC NICHE-LIKE DRUG SCREENING PLATFORM IN ACUTE**  
4 **MYELOID LEUKEMIA**

5

6 **AUTHORS:** Reinaldo Dal Bello, Justine Pasanisi, Romane Joudinaud, Matthieu  
7 Duchmann, Gaetano Sodaro, Clémentine Chauvel, Loic Vasseur, Bryann Pardieu,  
8 Paolo Ayaka, Giuseppe Di Feo, Frank Ling, Kim Pacchiardi, Camille Vaganay,  
9 Jeannig Berrou, Chaima Benaksas, Thorsten Braun, Claude Preudhomme, Hervé  
10 Dombret, Emmanuel Raffoux, Nina Fenouille, Emmanuelle Clappier, Lionel Adès,  
11 Alexandre Puissant, Raphael Itzykson.

12

13

14 **Table of Contents**

15 Supplementary Methods..... 2  
16 Supplementary References .....15  
17 Supplementary Tables.....16  
18 Supplementary Figures .....17  
19     Supplementary Figure 1.....17  
20     Supplementary Figure 2.....18  
21     Supplementary Figure 3.....19  
22     Supplementary Figure 4.....20  
23     Supplementary Figure 5.....21  
24     Supplementary Figure 6.....23  
25     Supplementary Figure 7.....24  
26     Supplementary Figure 8.....25  
27     Supplementary Figure 9.....26  
28     Supplementary Figure 10.....27

29

30

## 1 **Supplementary Methods**

2

### 3 *Clinical Annotations of AML samples*

4 Induction chemotherapy (IC) consisted of a standard anthracycline-cytarabine '7+3'  
5 regimen, with addition of a third drug (gemtuzumab ozogamycin or midostaurin) in a  
6 minority of cases. Complete Remission (CR) was defined according to ELN  
7 recommendations.<sup>1</sup> Patients with primary induction failure or morphologic leukemia-  
8 free state were grouped in the 'failure' group and those with early death (before end  
9 of induction bone marrow evaluation) were excluded from the analysis. Event-free  
10 survival was determined as the interval between diagnosis, primary induction failure,  
11 relapse or death, whichever occurred first and censored at allogeneic stem cell  
12 transplantation in first remission or last follow-up date.

13

### 14 *Genetic Annotations of AML samples*

15 *NPM1*, *FLT3* internal tandem duplications (*FLT3*-ITD) were tested using standard  
16 PCR-based methods as previously described.<sup>2</sup> *FLT3*-ITD allelic ratio (AR) quantified  
17 by fragment length analysis is expressed as ITD/wild-type allele ratio.<sup>1</sup> *IDH1* and  
18 *IDH2* were screened by Sanger sequencing.<sup>3</sup> Targeted sequencing was done with a  
19 custom SureSelectXT capture kit (Agilent Technologies) and 150-bp paired-end  
20 sequencing (Illumina MiSeq) and analyzed as previously described.<sup>4</sup> For  
21 chemogenomic screening, genes were grouped into cohesin (*RAD21*, *SMC1A*,  
22 *STAG2* or *SMC3*), *FLT3* (ITD or tyrosine kinase domain [TKD]), histone (*ASXL1*,  
23 *BCOR* or *EZH2*), methylation (*DNMT3A*, *IDH1*, *IDH2*, *TET2* or *WT1*), signaling  
24 (*BRAF*, *CBL*, *CSF3R*, *KIT*, *KRAS*, *NF1*, *NRAS*, *PTPN11* or *RIT1*) and splice (*PRPF8*,  
25 *SF3B1*, *SRSF2*, *U2AF1* or *ZRSR2*) groups. Measurable Residual Disease (MRD)

1 was performed on bone marrow samples by quantification of *NPM1*-mutated  
2 transcript levels with a mutation-specific real-time quantitative reverse transcriptase-  
3 polymerase chain reaction assay and *NPM1*-mutated transcript levels and expressed  
4 as a percentage of *ABL* copy number, as previously described.<sup>2</sup>

5

### 6 *Drugs*

7 All drugs were reconstituted and stored in DMSO except ATO that was stored in HCl  
8 2%. Detailed references and stock concentrations are provided in **Supplementary**  
9 **Table 3.**

10

### 11 *Short-term ex vivo culture*

12 All experiments were conducted in 96-well plate format. The day before, hTERT-  
13 MSC-GFP immortalized human mesenchymal stromal cells (MSCs, provided by JP  
14 Bourquin)<sup>5</sup> were seeded at 10 000 cells per well in Minimal Essential Medium Alpha  
15 (MEM $\alpha$ , Thermo Fisher Scientific, Waltham, MA, cat #22571) medium supplemented  
16 with 10% Fetal Bovine Serum (FBS, Thermo Fisher Scientific, cat #1027-106), L-  
17 glutamine 2 mM, 100IU/mL penicillin and 100  $\mu$ g/mL streptomycin (all from Eurobio,  
18 Les Ulis) and 1  $\mu$ M hydrocortisone (Sigma-Aldrich, Saint-Louis, MI) and maintained  
19 at 37°C in 20% O<sub>2</sub> and 5% CO<sub>2</sub>. The next day, the culture medium was removed and  
20 washed and AML MNCs were seeded at 50 000 cells per well using an electronic  
21 adjustable multichannel equalizer micropipette (E1-ClipTip Equalizer, Thermo Fisher  
22 Scientific) in 90  $\mu$ L of MEM $\alpha$  standard medium, or in plasma-like culture medium  
23 (**Supplementary Table 7**), both supplemented with 25% dialyzed FBS (Sigma-  
24 Aldrich, cat - F0392), 100 IU/mL penicillin and 100  $\mu$ g/mL streptomycin. When

1 indicated, culture medium was also supplemented with TPO 1 ng/mL and EPO 2.5  
2 ng/mL (both from Peprotech, Neuilly-sur-Seine) to reach 'plasma-like' cytokine  
3 concentrations. Drugs were resuspended in standard medium, or in plasma-like  
4 culture medium supplemented as *supra*, and 10  $\mu$ L of a 10X drug concentration  
5 immediately added to each well, resulting in a maximum DMSO 0.1% concentration.  
6 Plates were then incubated for 72 hours at 37°C in 20% O<sub>2</sub> and 5% CO<sub>2</sub> or in 3% O<sub>2</sub>  
7 and 5% CO<sub>2</sub> (hypoxia, MCO-19M-PE incubator, Panasonic, Genevilliers).

8

#### 9 *Multiparametric flow cytometry*

10 Cells were washed and stained with Fixable Viability Stain eFluor 780 (Thermo  
11 Fisher Scientific), anti-CD45 PerCPCY5.5 (Clone HI30), anti-GPR56 PE (Clone  
12 CG4), anti-CD11b APC (Clone ICRF44), anti-CD14 APC (Clone M5E2), anti-CD15  
13 APC (Clone HI98), anti-CD3 BV421 (Clone UCHT1) and anti-CD19 BV421 (Clone  
14 HIB19, all from BD Biosciences, Le Pont de Claix) and processed on an Attune Next  
15 (Thermo Fischer Scientific) flow cytometer. Cell counts were obtained after manual  
16 gating on FlowJo V10.6.2 (Beckton Dickinson, Le Pont de Claix).

17

#### 18 *Leukemic long-term culture initiating capacity (L-LTC-IC) assay*

19 Leukemic long-term culture initiating capacity (L-LTC-IC) assay of GPR56+ and  
20 GPR56- residual leukemic cells was done as previously published.<sup>6</sup>

21 MS-5 stromal cells (kind gift of Eric Solary) were maintained in MEM $\alpha$  medium  
22 (Thermo Fisher Scientific, cat #22571) supplemented with 10% FBS (FBS, Gibco cat  
23 #1027-106), L-glutamine 2 mM (ThermoFischer Scientific, cat #25030-024),  
24 100IU/mL penicillin and 100  $\mu$ g/mL streptomycin (Eurobio, cat # CABPES010U) at

1 37°C in 20% O<sub>2</sub> and 5% CO<sub>2</sub>. Forty-eight hours before co-culture, MS-5 cells were  
2 trypsinized, seeded in 6-well culture plates at 40,000 cells/well to reach a 70%  
3 confluence after 24 hours. The resulting feeder layer was irradiated at 5 Gy before  
4 addition of leukemic cells 24 hours later at 5x10<sup>5</sup> cells /mL in 6-well plates. Following  
5 72-hour co-culture with MS-5 in 3% O<sub>2</sub> in MEM $\alpha$  (Thermo Fisher Scientific, cat  
6 #22571) medium, 12.5% FBS qualified for long-term hematopoietic culture (Stem Cell  
7 Technologies, 06150), 12.5% horse serum (Stem Cell Technologies, cat #06750),  
8 100IU/mL penicillin and 100  $\mu$ g/mL streptomycin (Eurobio, cat # CABPES010U),  
9 residual cells were collected, stained with anti-CD45 PerCPCY5.5 (Clone HI30, BD  
10 Biosciences cat #564105), anti-GPR56 PE (Clone CG4, BD Biosciences cat  
11 #567213) and anti-mSca1 FITC (Clone D7, BD Biosciences cat # 557405).

12 Viable CD45+/mSca1- cells were sorted into GPR56+ and GPR56- fractions and  
13 plated at 5x10<sup>5</sup> cells /mL into 6, 12 or 24 well plates according to the number of cells  
14 on a 5 Gy-irradiated MS5 stromal layer and cultured in in MEM $\alpha$  medium (Thermo  
15 Fisher Scientific, cat #22571) supplemented with 12.5% FBS qualified for long-term  
16 hematopoietic culture (Stem Cell Technologies, cat #06150), 12.5% horse serum  
17 (Stem Cell Technologies, cat #06750), 100IU/mL penicillin and 100  $\mu$ g/mL  
18 streptomycin (Eurobio, cat # CABPES010U), 7.5  $\mu$ g/mL alaphthioglycerol (Sigma-  
19 Aldrich, cat # M6145) and cytokines (SCF 25 ng/mL, TPO 50 ng/mL, IL-3 10 ng/mL,  
20 FLT3-L 50 ng/mL, IL-6 10 ng/mL, G-CSF 10 ng/mL, GM-CSF 10 ng/mL, EPO 10  
21 ng/mL, all from Peprotech) for three weeks with weekly half medium renewal.

22 At day 21, cells were mechanically resuspended, washed in Phosphate Buffered  
23 Saline (PBS, Life Technologies) with 2% Bovine Serum Albumin (BSA, Sigma-  
24 Aldrich, cat # A9418) and stained with APC-H7 anti-human CD45 (clone 2D1, BD

1 Biosciences cat # 560178) and FITC anti-mouse Sca1 (Clone D7, BD Biosciences  
2 cat # 557405). Residual leukemic mSca1-/hCD45+ cells were sorted on an Aria III  
3 cell sorter (Beckton Dickinson), washed and resuspended in 800  $\mu$ L MEM $\alpha$ . This cell  
4 suspension was added to 3.2 mL of methylcellulose (50% H4100 Methocult® [Stem  
5 Cell Technologies], 37.5% FBS [Stem Cell Technologies], 1.25% bovine serum  
6 albumin (BSA), 1% L-glutamine, and 7.5  $\mu$ g/mL alaphthioglycerol) supplemented with  
7 cytokines (SCF 25 ng/mL, TPO 50 ng/mL, IL-3 10 ng/mL, FLT3-L 50 ng/mL, IL-6 10  
8 ng/mL, G-CSF 10 ng/mL, GM-CSF 10 ng/mL, EPO 10 ng/mL [all from Peprotech])  
9 before seeding in triplicate at 1 mL per 60x19 mm culture dish. Colonies were  
10 counted after 14 days incubation in 20% O<sub>2</sub>, 5% CO<sub>2</sub> at 37°C. The colony count was  
11 multiplied by 3 (triplicate methylcellulose dishes) and normalized to the number of  
12 sorted GPR56+ and GPR56- cells to derive the Long-Term Culture Initiating Cell  
13 (LTC-IC) frequency in each fraction.

14

#### 15 *Healthy CD34+ dose-response assays*

16 Leukapheresis or cord blood samples from healthy donors were obtained after  
17 approval from the Saint-Louis Hospital Cell Therapy Department. Following gradient  
18 density centrifugation, CD34+ stem/progenitor cells were obtained by  
19 immunomagnetic enrichment (Macs; Miltenyi Biotec). 10,000 CD34+ cells per well  
20 were seeded in 96-well plates previously coated with hTERT-MSC-GFP cells and  
21 tested in triplicate in a dose-response assay in a 5-point, 3-fold dilution assay in a 72-  
22 hour culture in standard culture conditions (MEM $\alpha$  [Thermo Fisher Scientific, cat  
23 #22571] supplemented with 12.5% FBS qualified for long-term hematopoietic culture  
24 [Stem Cell Technologies, cat #06150], 12.5% horse serum [Stem Cell Technologies,

1 cat #06750], 100IU/mL penicillin and 100 µg/mL streptomycin (Eurobio, cat #  
2 CABPES010U) and 7.5 µg/mL alphathioglycerol (Sigma-Aldrich, cat # M6145). Half-  
3 maximal inhibitory concentrations (IC50s) were obtained by fitting a four-parameter  
4 dose-response curve with the least square method in Prism 8.0.1 (GraphPad).  
5 Inhibitory concentrations for alternative cell fractions (eg. IC40) were obtained based  
6 on IC50s and Hill's coefficients with the Quickcalcs online calculator  
7 (<https://www.graphpad.com/quickcalcs/Ecanything1.cfm>, GraphPad).

8

### 9 *Systematic interrogation of pseudo-niche components in a mini-panel drug screening*

10 To study the role of pseudo-niche components on basal culture outputs (ie without  
11 drugs), cell counts of total leukemic bulk, LSCs and differentiating cells were filtered  
12 on DMSO 0.1% vehicle wells (6 technical replicates per condition). Mixed effects  
13 models were carried for each output (total number of cells in the leukemic bulk,  
14 proportion of LSCs and proportion of differentiating cells in the bulk) after scaling for  
15 standardization of fixed effect coefficients, including terms for MSC (reference: no  
16 MSC), hypoxia (reference: 20% O<sub>2</sub>), plasma-like amino acids (reference: standard  
17 culture medium) and plasma-like cytokines (reference: no cytokine addition), second  
18 order interaction terms between pseudo-niche components terms, and including a  
19 random effect for AML patients. The relative importance of each term in the model  
20 was determined based on the R<sup>2</sup> partitioned by averaging over orders (lmg metrics)  
21 using the *relaimpo* R package.<sup>7</sup>

22 To study the role of pseudo-niche components on drug activities, similar mixed effect  
23 models were carried including AUCs on the total number of leukemic cells, number of  
24 LSCs and number of differentiated cells, with fixed effects for pseudo-niche

1 components and random effects for patients. Differences across drugs were studies  
2 by performing subgroup analysis focusing on each individual drugs, while overall  
3 behaviors were investigated by adding a random effect term for drugs in the mixed  
4 effect models.

5

#### 6 *AML bone marrow plasmas and conditioned media*

7 Plasma samples were collected at the time of diagnosis from BM aspirates in EDTA.  
8 Briefly, BM samples were centrifuged at 260g for 5 minutes. The platelet-rich plasma  
9 fraction was collected and further centrifuged at 1850 g for 15 minutes. Aliquots of  
10 the platelet-low plasma fraction were stored at -80°C.

11 Conditioned medium from h-TERT-MSC-GFP cells (n=1) or h-TERT-MSC-GFP and  
12 primary AML MNCs co-cultures (n=5) grown in MEM $\alpha$  (Thermo Fisher Scientific, cat  
13 #22571) supplemented with 12.5% FBS (Stem Cell Technologies, cat #06150),  
14 12.5% horse serum (Stem Cell Technologies, cat #06750), 7.5  $\mu$ g/mL  
15 alaphathioglycerol (Sigma-Aldrich, cat # M6145), 100IU/mL penicillin and 100  $\mu$ g/mL  
16 streptomycin (EUROBIO, cat # CABPES010U) for 48 hours. Supernatants were  
17 collected, centrifuged and stored as *supra*.

18

#### 19 *Targeted metabolomics*

20 Aliquots of diagnostic AML BM plasma samples (n=24) or conditioned media from h-  
21 TERT-MSC-GFP cells (n=1) or h-TERT-MSC-GFP and primary AML MNCs co-  
22 cultures (n=5) underwent targeted metabolomics with the AbsoluteIDQ® p180 Assay  
23 (Biocrates, Innsbruck, Austria).



1 *Multiplex cytokine levels assays*

2 Aliquots of diagnostic AML BM plasma samples (n=21) and conditioned media from  
3 h-TERT-MSC-GFP cells (n=1) or h-TERT-MSC-GFP and primary AML MNCs co-  
4 cultures (n=5) underwent targeted cytokine profiling through  
5 electrochemoluminescence with a custom multiplex assay for EPO, FLT3L, G-CSF,  
6 GM-CSF, IL-3, IL-6, M-CSF, TPO (U-PLEX®) and a standard R-PLEX® SCF assay  
7 and processed on a Quickplex station (all from MesoScale Discovery, Rockville,  
8 Maryland) according to manufacturer's guidelines.

9

10 *RNA-Seq*

11 Cryopreserved AML MNCs from 4 patients were thawed and immediately processed  
12 for RNA extraction (primary AML) or cultured in 6-well plates at 500.000 cells/mL  
13 during 6 hours in niche-like or standard conditions, washed in PBS 2.5% EDTA  
14 (Invitrogen, cat # 15575-038) then processed for RNA extraction using RNeasy plus  
15 microkit (Qiagen cat # 74034). RNAs were assessed using a BioAnalyzer 2100  
16 (Agilent). Only 9 of 12 samples passed QC. Libraries were generated from total RNA  
17 using the SMARTer Universal Low Input RNA Kit (Takara Bio) according to  
18 manufacturer's instructions and sequenced on Illumina NovaSeq6000 to (100 bp  
19 paired-end reads). RNA seq reads were aligned to the human reference genome  
20 using Salmon 1.0.0.<sup>8</sup> DESeq2 was used to obtain normalized expression values.<sup>9</sup>  
21 GSEA analysis was run with *fgsea* on pre-ranked genes using log-transformed fold  
22 change as ranking metric, using the 6 leukemic signatures from Van Galen et al.  
23 **(Supplementary Table 9)**.<sup>10</sup>

## 1 *DNA-Seq*

2 Identification of gene mutations with a 43-gene panel on primary AML MNCs at  
3 diagnosis was done as previously described.<sup>4</sup> Viable frozen MNCs were thawed and  
4 cultured in 6-well plates at 500,000 cells/mL during 72 hours in niche-like or standard  
5 conditions as described supra. After 72 hours, cells were resuspended in PBS 2.5%  
6 EDTA (Invitrogen, cat # 15575-038), labeled with PE anti-CD45 (Beckman, cat #  
7 A07783) and 7-Aminoactinomycin D (7-AAD, Thermo Fisher Scientific cat # A1310)  
8 and viable CD45<sup>dim</sup>/SSC<sup>low</sup> blasts (median 3.75x10<sup>5</sup> cells, range 0.85 - 19.8 x10<sup>5</sup>  
9 cells) were sorted in BD FACSAria II (BD Biosciences). DNA extraction was done  
10 using DNeasy blood and tissue kit (Qiagen, cat # 69504) according to manufacturer's  
11 instructions. DNA concentrations were determined using a Qubit dsDNA BR Assay  
12 (ThermoFisher Q32850) according to manufacturer's instructions. Primers  
13 (**Supplementary Table 8**) were designed and tested on bulk for all somatic  
14 mutations detected on bulk sequencing at diagnosis for the 7 patients. Targeted  
15 amplicons were generated from diagnosis and post-culture samples using a  
16 multiplexed PCR using KAPA2G Robust HotStart kit (Sigma Aldrich, cat KK5515)  
17 (number of cycles = 26 or 32), were purified using AMPure XP beads (Beckman,  
18 A63881) and quantified using Bioanalyzer High Sensitivity DNA kit (Agilent, 5067-  
19 4626). Library preparation was done using the Illumina DNA prep protocol (Illumina,  
20 cat 20018704) and Nextera DNA CD Indexes (Illumina, 20018707) using an initial  
21 input of 10 ng of purified PCR products. The final library was sequenced on a Miseq  
22 (Illumina, V2 chemistry, 150 bp x2, dual indexes). Fastq files were pre-processed  
23 using Fastp (version 0.20.1),<sup>11</sup> aligned with BWA (version 0.7.17),<sup>12</sup> on the Homo  
24 Sapiens reference Genome version hg38. Variant calling was done using VarScan  
25 (version 2.4.4) and Pindel (version 0.2.5b9) callers.

1 *Single-cell RNA sequencing*

2 After thawing, cryopreserved AML MNCs from patient SLS393 from the same vial  
3 were split into three aliquots of  $2 \times 10^6$  cells each. The first was submitted to Dead Cell  
4 removal protocol (Dead Cell Removal Kit, Miltenyi Biotec, cat #130-090-101),  
5 followed by positive hCD45 immunomagnetic selection (CD45 MicroBeads human,  
6 Miltenyi Biotec, cat #130-045-801) following the manufacturer's instructions and  
7 submitted to scRNA-seq (pre-culture sample). The two others were cultured in 6-well  
8 plates at 500.000 cells/mL in niche-like or standard conditions for 72 hours,  
9 harvested and submitted to Dead Cell Removal and positive hCD45  
10 immunomagnetic selection as *supra* before scRNA-seq.

11 For scRNA-seq library preparation, cells were processed using the Chromium  
12 platform and the 3' Gene expression v3.1 library preparation kit (10XGenomics).  
13 Libraries were pooled and sequenced on a Novaseq S4 platform (Illumina). Fastq  
14 files were processed using Cellranger V6, and counts data were analyzed using  
15 Seurat V4.<sup>13</sup> Counts were normalized the *SCTransform* method with regression on  
16 cell-cycle scores, then integrated using reciprocal principal component analysis.  
17 Differential expression testing was done on 500 progenitor cells for each condition  
18 using the MAST package.<sup>14</sup> For each contrast, only genes expressed in at least 10%  
19 of cells in at least one of the two groups were considered. GSEA analyses were run  
20 with *fgsea* on pre-ranked genes using log-transformed fold change as ranking metric,  
21 using hallmark pathways from MSigDB ([https://www.gsea-](https://www.gsea-msigdb.org/gsea/msigdb/)  
22 [msigdb.org/gsea/msigdb/](https://www.gsea-msigdb.org/gsea/msigdb/)).<sup>15</sup> Cell identity was based on expression of canonical  
23 markers (i.e *IL7R* and *CD8A* for T cells, *CD79A* for B cells, *NKG7* for NK cells, *CD14*  
24 for monocytes, *CST3* for dendritic cells, *IGFBP5* for stromal cells). Progenitor cells  
25 highly expressed *HOXA9*, *KIT*, *IL3RA* and *MYC*, and were enriched for HSPC-like

1 and Progenitor-like signatures derived from Van Galen et al.<sup>10</sup> Cell cycle scores were  
2 derived from Tirosh et al.<sup>16</sup>

3

#### 4 *Patient Derived Xenotransplants (PDX)*

5 All mouse experiments were performed in accordance with protocols approved by the  
6 Comité d'Ethique en Expérimentation Animale Paris-Nord n°121 (project #8909-  
7 2017021413452743).  $2.5 \times 10^6$  *FLT3*-ITD, *NPM1c*, *DNMT3A*<sup>R882H</sup>, and *IDH1*<sup>R132H</sup> AML  
8 primary cells were transplanted by tail vein injection into 10-12 week-old sub-lethally  
9 irradiated recipient NOD.Cg-Prkdcscid IL2rgtm1Sug Tg(SV40/HTLV-IL3, CSF2) 10-  
10 7Jic/Jic Tac (hu NOG-EXL) males purchased from Taconic. Sample size was chosen  
11 according to historical experiments with this highly penetrant and consistent model.  
12 Blinded observers visually inspected mice for signs of distress (appetite loss,  
13 hunched posture or lethargy). Animals were to be excluded in case of distress. None  
14 of our mice had to be excluded because of distress without detectable blasts in the  
15 blood or bone marrow. Fourteen days after injection, engraftment was confirmed by  
16 measuring circulating hCD45-positive blasts in blood. Following randomization, mice  
17 were treated once daily by oral gavage with 40mg/kg ruxolitinib (Medchemexpress  
18 cat # HY-50858) diluted in 0.5% methylcellulose (Alfa Aesar, cat # 43147) or vehicle  
19 only for 14 days, once daily with chemotherapy (tail vein injection of 1mg/kg  
20 doxorubicin for 3 days and intraperitoneal injection of 50mg/kg cytarabine for 5 days),  
21 starting on day 2 of ruxolitinib or vehicle, or both chemotherapy and ruxolitinib.

22 Bone marrow biopsies were performed on anesthetized animals at indicated time  
23 points. Samples were lysed in Red blood cell lysing buffer (Sigma, cat # R7757),  
24 washed twice with PBS and resuspended in PBS 0.5% BSA (Sigma-Aldrich, cat #  
25 A7906), 2mM EDTA (Invitrogen, cat # 15575-038) prior to staining with APC-

1 conjugated anti-human CD45 (clone 2D1, BioLegend, cat # 368512). Samples were  
2 washed 3 times before analysis on a BD FACSCanto II (BD Biosciences) flow  
3 cytometer.

4

#### 5 *AML drug screening data analyses*

6 Cell counts in each gate were normalized to negative controls (DMSO 0.1% vehicle  
7 wells). Drug activity was determined as the actual (trapezoidal) area over the curve  
8 (AOC) of cell counts (ie without fitting a dose-response curve) without truncation,  
9 using the *PharmacGx* R package.<sup>17</sup> With AOCs, higher values indicate greater drug  
10 activity. The 'Area Over the Curve'-type metric, integrating potency and efficacy was  
11 chosen for its robustness compared to conventional potency metrics such as IC50s.<sup>18</sup>  
12 Actual rather than fitted data was used because of the limited relevance of  
13 conventional dose response curve fitting for non-cytotoxic drugs.<sup>19,20</sup> Finally, cell  
14 counts were not truncated to account for the fact that some drugs may induce  
15 differentiation not captured by our differentiation markers (CD11b, CD14 and CD15),  
16 resulting in cell counts over the baseline of vehicle-treated wells in the blasts gate.  
17 Thus, drug activity metrics can fall below 0. For the differentiation activity metric,  
18 normalized differentiating cell counts (Diff) were transformed in each experiment as ~  
19  $1 - (1/\text{Diff}_{\text{max}})$  to obtain activity metrics in the 0-1 range, with higher values indicating  
20 more potent differentiation.

21

#### 22 *Statistical analyses*

23 Statistical analyses were conducted in Prism 8.0.1 (GraphPad) or R version 3.6.0  
24 (<https://www.R-project.org/>). Group comparisons for continuous variables were

1 carried with student t tests with Welch's correction or Mann-Whitney's tests for  
2 technical and biological replicates, respectively. Survival analyses were done with  
3 Cox models. Adjustment for multiple testing was done with the Benjamini & Hochberg  
4 method.<sup>21</sup>

## 1 Supplementary References

- 2 1. Dohner H, Estey E, Grimwade D, et al. Diagnosis and management of AML in adults: 2017 ELN  
3 recommendations from an international expert panel. *Blood*. 2017;129(4):424-447.
- 4 2. Balsat M, Renneville A, Thomas X, et al. Postinduction Minimal Residual Disease Predicts  
5 Outcome and Benefit From Allogeneic Stem Cell Transplantation in Acute Myeloid Leukemia With  
6 NPM1 Mutation: A Study by the Acute Leukemia French Association Group. *J Clin Oncol*.  
7 2017;35(2):185-193.
- 8 3. Boissel N, Nibourel O, Renneville A, et al. Prognostic impact of isocitrate dehydrogenase  
9 enzyme isoforms 1 and 2 mutations in acute myeloid leukemia: a study by the Acute Leukemia  
10 French Association group. *J Clin Oncol*. 2010;28(23):3717-3723.
- 11 4. Cerrano M, Duchmann M, Kim R, et al. Clonal dominance is an adverse prognostic factor in  
12 acute myeloid leukemia treated with intensive chemotherapy. *Leukemia*. 2020.
- 13 5. Frismantas V, Dobay MP, Rinaldi A, et al. Ex vivo drug response profiling detects recurrent  
14 sensitivity patterns in drug-resistant acute lymphoblastic leukemia. *Blood*. 2017;129(11):e26-e37.
- 15 6. Masse A, Roulin L, Pasanisi J, et al. BET inhibitors impair leukemic stem cell function only in  
16 defined oncogenic subgroups of acute myeloid leukaemias. *Leuk Res*. 2019;87:106269.
- 17 7. Groemping U. Relative Importance for Linear Regression in R: The Package relaimpo. 2006.  
18 2006;17(1):27.
- 19 8. Patro R, Duggal G, Love MI, Irizarry RA, Kingsford C. Salmon provides fast and bias-aware  
20 quantification of transcript expression. *Nat Methods*. 2017;14(4):417-419.
- 21 9. Love MI, Huber W, Anders S. Moderated estimation of fold change and dispersion for RNA-  
22 seq data with DESeq2. *Genome Biol*. 2014;15(12):550.
- 23 10. van Galen P, Hovestadt V, Wadsworth li MH, et al. Single-Cell RNA-Seq Reveals AML  
24 Hierarchies Relevant to Disease Progression and Immunity. *Cell*. 2019;176(6):1265-1281 e1224.
- 25 11. Chen S, Zhou Y, Chen Y, Gu J. fastp: an ultra-fast all-in-one FASTQ preprocessor.  
26 *Bioinformatics*. 2018;34(17):i884-i890.
- 27 12. Li H, Durbin R. Fast and accurate short read alignment with Burrows-Wheeler transform.  
28 *Bioinformatics*. 2009;25(14):1754-1760.
- 29 13. Hao Y, Hao S, Andersen-Nissen E, et al. Integrated analysis of multimodal single-cell data.  
30 *Cell*. 2021;184(13):3573-3587 e3529.
- 31 14. Finak G, McDavid A, Yajima M, et al. MAST: a flexible statistical framework for assessing  
32 transcriptional changes and characterizing heterogeneity in single-cell RNA sequencing data. *Genome*  
33 *Biol*. 2015;16:278.
- 34 15. Liberzon A, Birger C, Thorvaldsdottir H, Ghandi M, Mesirov JP, Tamayo P. The Molecular  
35 Signatures Database (MSigDB) hallmark gene set collection. *Cell Syst*. 2015;1(6):417-425.
- 36 16. Tirosh I, Venteicher AS, Hebert C, et al. Single-cell RNA-seq supports a developmental  
37 hierarchy in human oligodendroglioma. *Nature*. 2016;539(7628):309-313.
- 38 17. Smirnov P, Safikhani Z, El-Hachem N, et al. PharmacoGx: an R package for analysis of large  
39 pharmacogenomic datasets. *Bioinformatics*. 2016;32(8):1244-1246.
- 40 18. Fallahi-Sichani M, Honarnejad S, Heiser LM, Gray JW, Sorger PK. Metrics other than potency  
41 reveal systematic variation in responses to cancer drugs. *Nat Chem Biol*. 2013;9(11):708-714.
- 42 19. Ritz C, Baty F, Streibig JC, Gerhard D. Dose-Response Analysis Using R. *PLoS One*.  
43 2015;10(12):e0146021.
- 44 20. Tyner JW, Tognon CE, Bottomly D, et al. Functional genomic landscape of acute myeloid  
45 leukaemia. *Nature*. 2018;562(7728):526-531.
- 46 21. Benjamini Y, Hochberg Y. Controlling the False Discovery Rate - a Practical and Powerful  
47 Approach to Multiple Testing. *J Roy Stat Soc B Met*. 1995;57:289-300.

48

1 **Supplementary Tables**

2 Available online.



**Supplementary Figures**

**Supplementary Figure 1.** Relative importance (lmg metrics) of each pseudo-niche component and their interactions on each readout in vehicle (DMSO 0.1%) treated cells based on the same mixed effect models as depicted in Figure 3C.

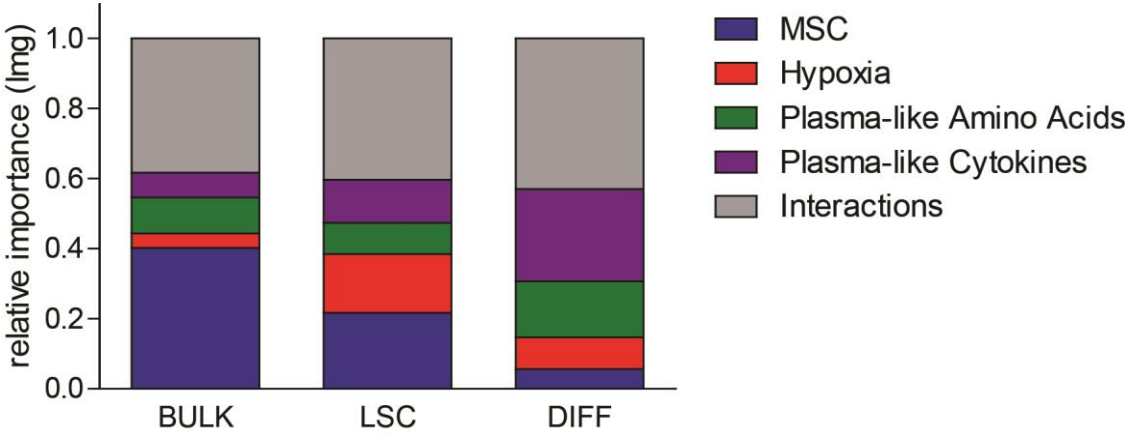

**Supplementary Figure 2.** Relative importance (lmg metrics) of each pseudo-niche component and their interactions on each readout of drug activity in mixed effect models including random effects for drugs and patients.

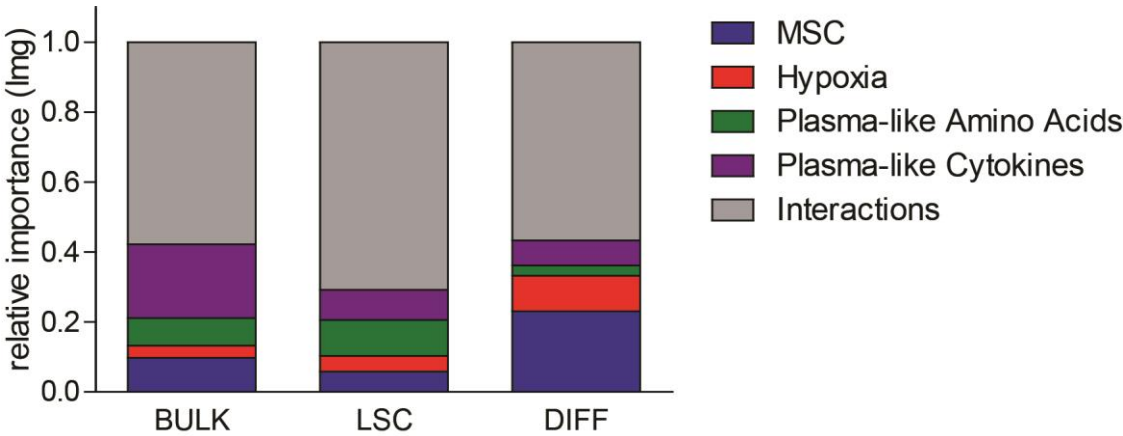

**Supplementary Figure 3.** Drug activities for each readout and each patient in standard versus niche-like conditions. P values from Wilcoxon signed rank tests.

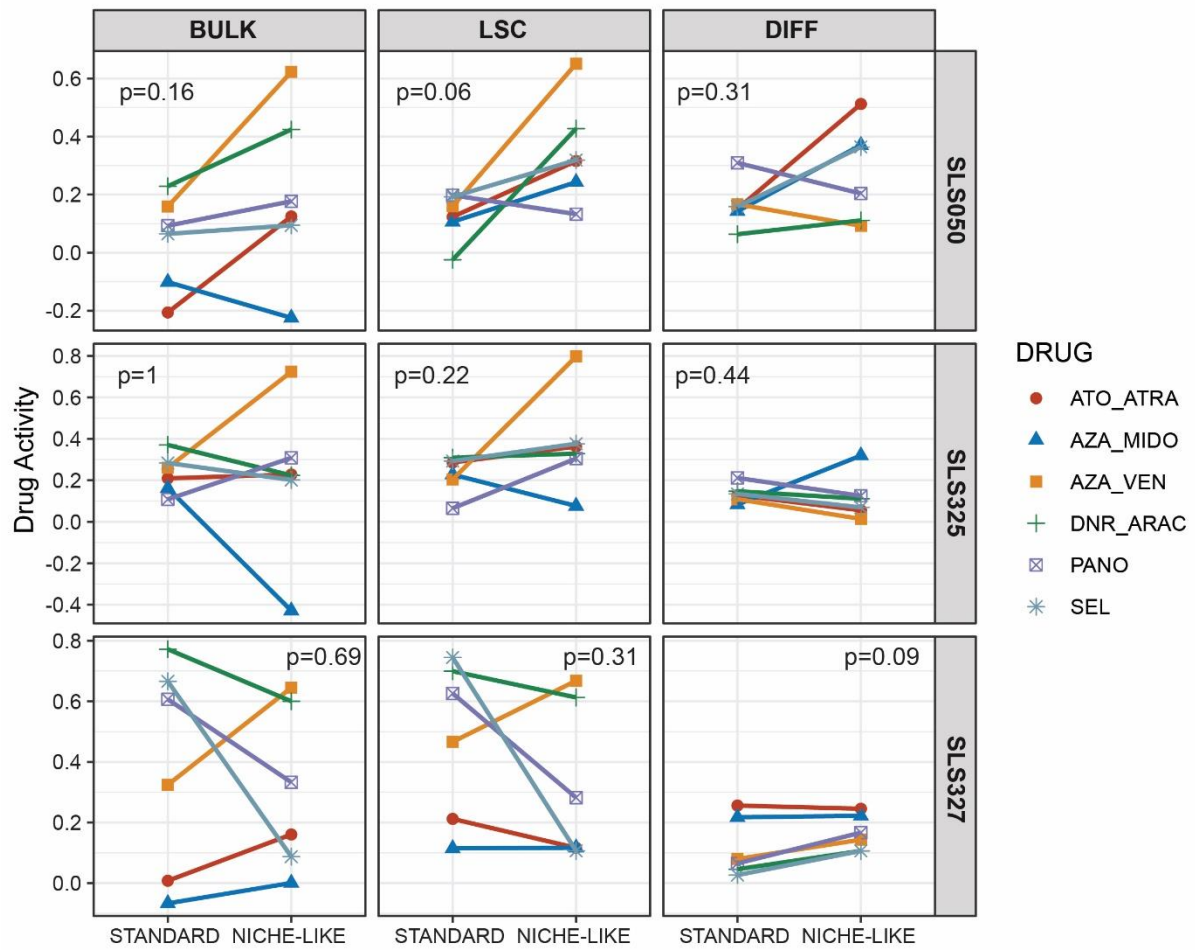

**Supplementary Figure 4.** Variant Allele Frequencies in primary AML MNCs and residual blasts after 72-hour culture in standard (no MSC, 20% O<sub>2</sub>, standard MEM-alpha medium) or niche-like (MSC co-culture, 3% O<sub>2</sub>, plasma-like amino acids and cytokines) culture. Circles are proportional to VAFs, normalizing circle diameter based on the highest VAF in each sample. Additional cases from **Figure 4A**. Detailed mutations are provided in **Supplementary Table 7**.

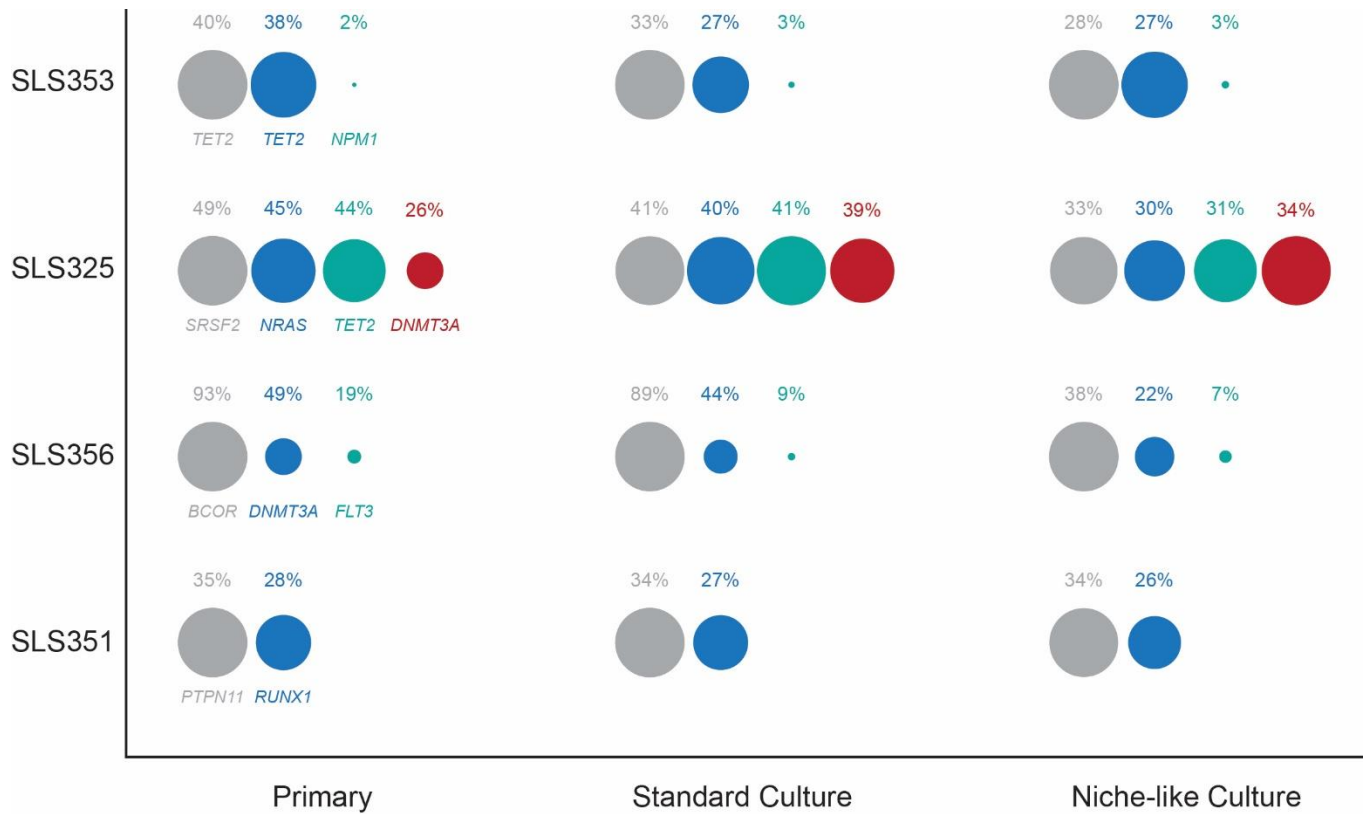

**Supplementary Figure 5. A.** Venn Diagramm of Differentially Expressed Genes (absolute fold change > 1.5 and FDR q-value <0.05) and **B.** Heatmap of Normalized Enrichment Scores (NES, if FDR q-value < 0.1) after Gene Set Enrichment Analysis on MSigDB pathways on average expression levels in 500 progenitor cells from SLS393 determined by sc-RNA-Seq pre-culture and after 72 hours of *ex vivo* culture in standard or niche-like conditions.

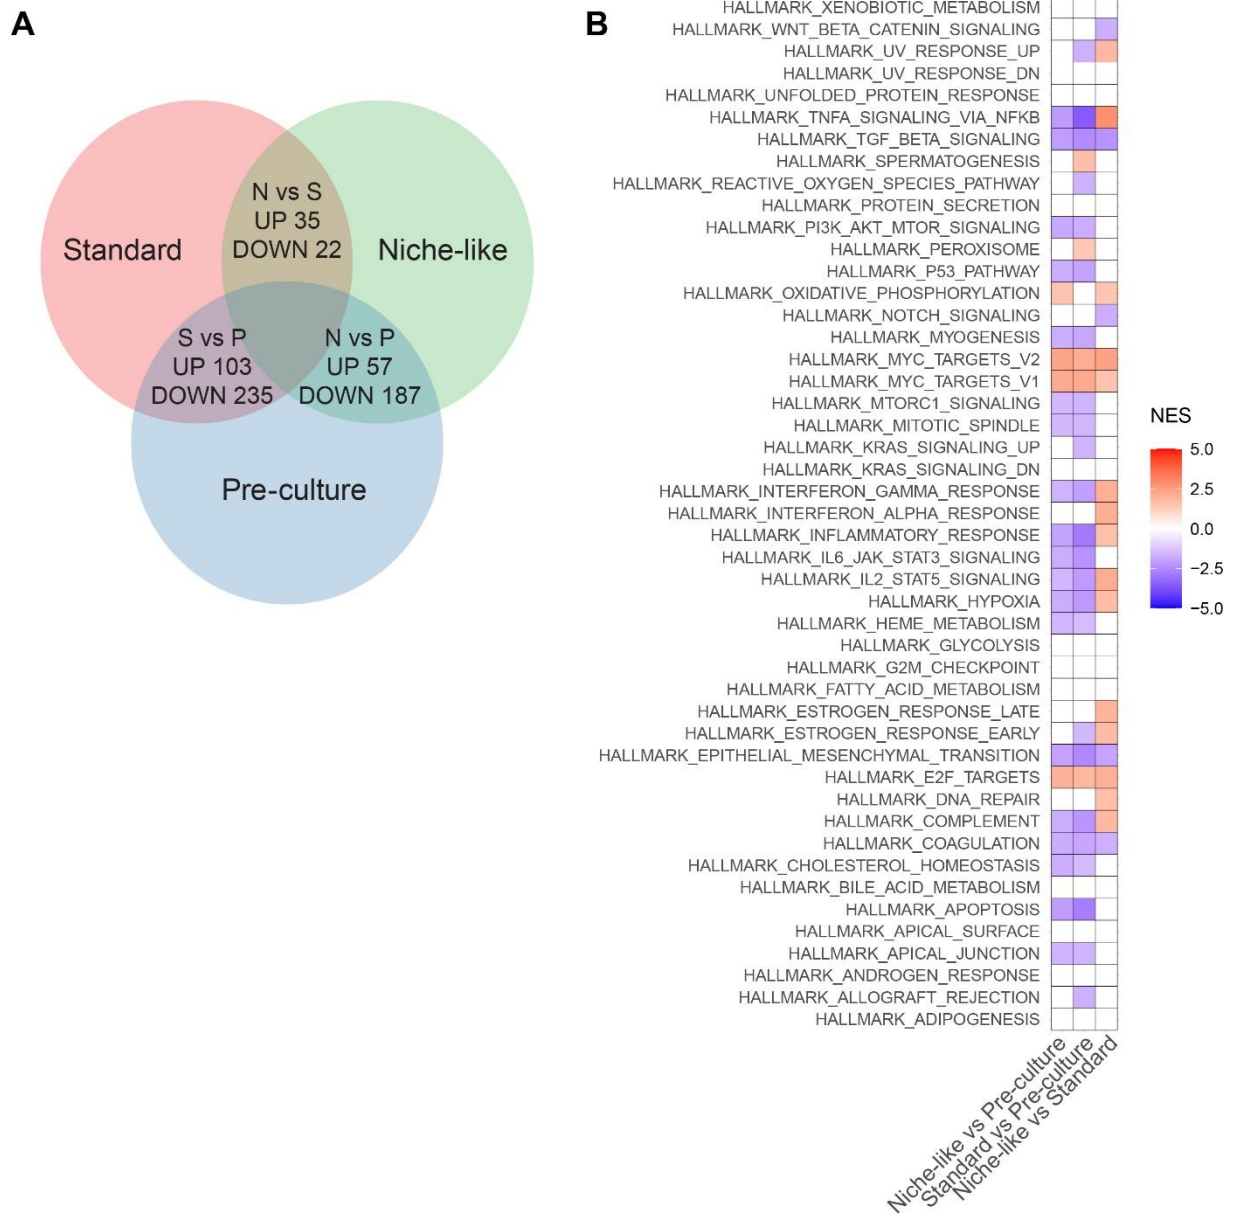

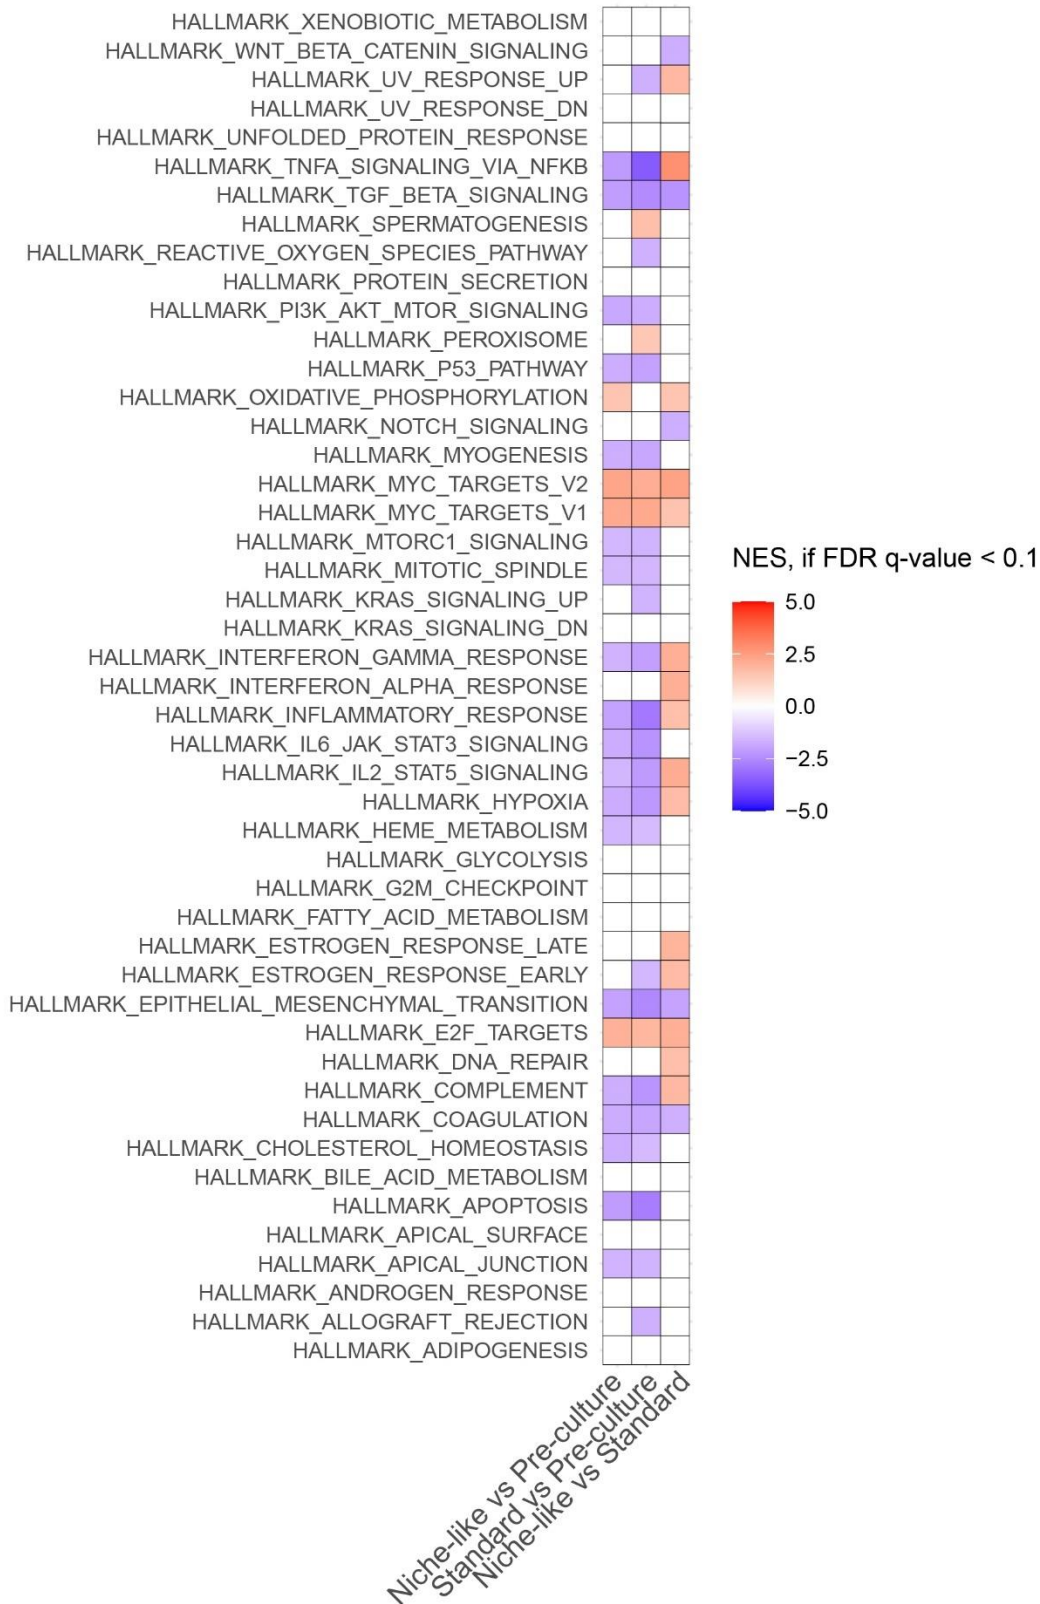

**Supplementary Figure 6.** Activity of the DNR-AraC combination alone or with fixed, low concentrations of each of 23 drugs (related to **Figure 5**) on the leukemic bulk of each of the 45 tested patients (**Supplementary Table 1**).

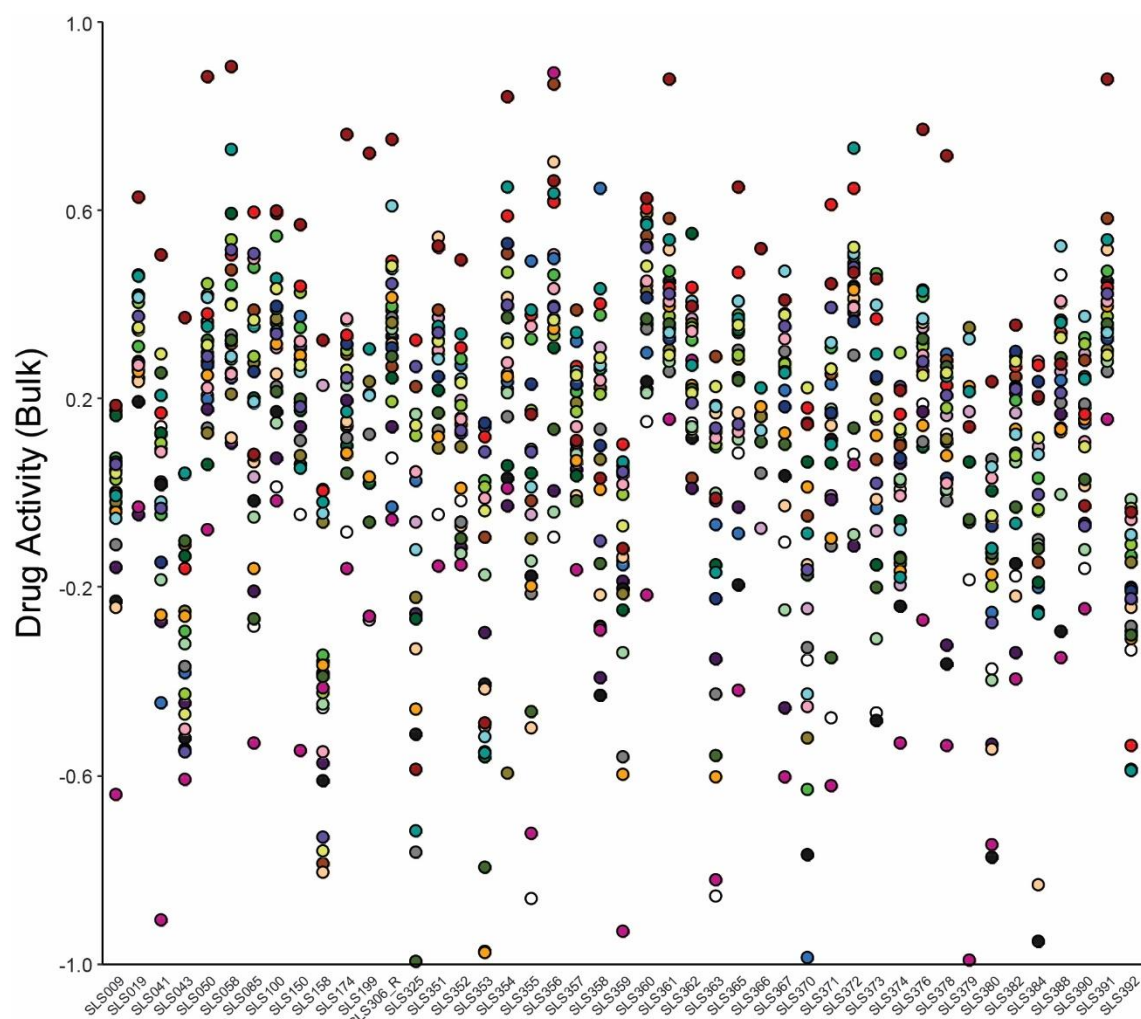

**Combination**

- |                 |                 |
|-----------------|-----------------|
| ○ DNR-ARAC      | ● +MI-2         |
| ● +ACTINO_D     | ● +MIDOSTAURIN  |
| ● +ATRA         | ● +OLAPARIB     |
| ● +CRENOLANIB   | ● +OTX015       |
| ● +DABRAFENIB   | ● +PALBOCICLIB  |
| ● +DACTOLISIB   | ● +PANOBINOSTAT |
| ● +ENASIDENIB   | ● +RUXOLITINIB  |
| ● +EPZ5676      | ● +S63845       |
| ● +GILTERITINIB | ● +SELINEXOR    |
| ● +GLASDEGIB    | ● +ULIXERTINIB  |
| ● +IDASANUTLIN  | ● +UPROSERTIB   |
| ● +IVOSIDENIB   | ● +VENETOCLAX   |

**Supplementary Figure 7.** Activity of the DNR-AraC combination alone or with fixed, low concentrations of each of 23 drugs (related to **Figure 5**) on LSCs of each of the 45 tested patients (**Supplementary Table 1**).

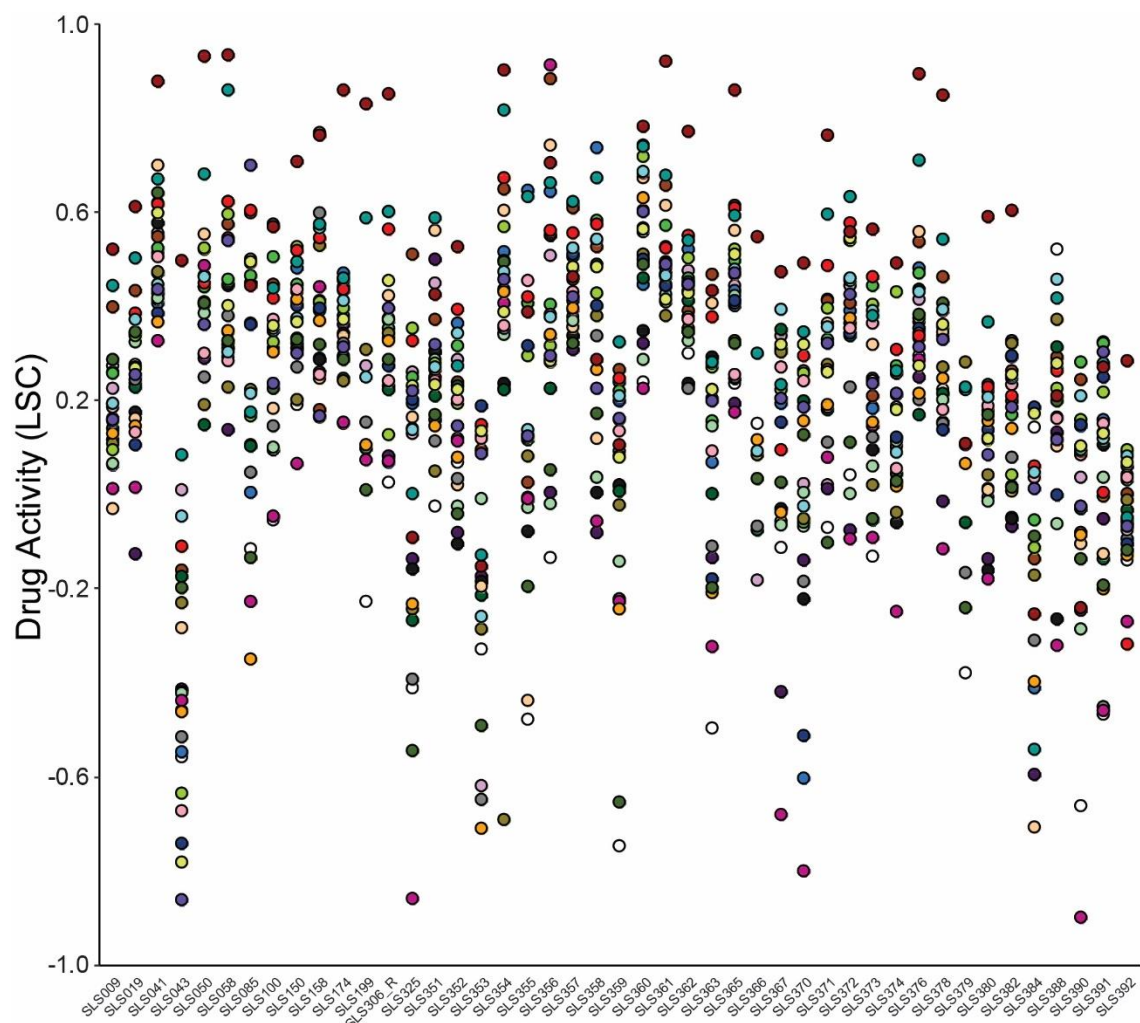

**Combination**

- |                 |                 |
|-----------------|-----------------|
| ○ DNR-ARAC      | ● +MI-2         |
| ○ +ACTINO_D     | ● +MIDOSTAURIN  |
| ● +ATRA         | ● +OLAPARIB     |
| ● +CRENOLANIB   | ● +OTX015       |
| ● +DABRAFENIB   | ○ +PALBOCICLIB  |
| ● +DACTOLISIB   | ● +PANOBINOSTAT |
| ● +ENASIDENIB   | ● +RUXOLITINIB  |
| ● +EPZ5676      | ○ +S63845       |
| ○ +GILTERITINIB | ● +SELINEXOR    |
| ● +GLASDEGIB    | ● +ULIXERTINIB  |
| ○ +IDASANUTLIN  | ● +UPROSERTIB   |
| ● +IVOSIDENIB   | ● +VENETOCLAX   |



**Supplementary Figure 8.** Differentiating activity of the DNR-AraC combination alone or with fixed, low concentrations of each of 23 drugs (related to **Figure 5**) in each of the 45 tested patients (**Supplementary Table 1**).

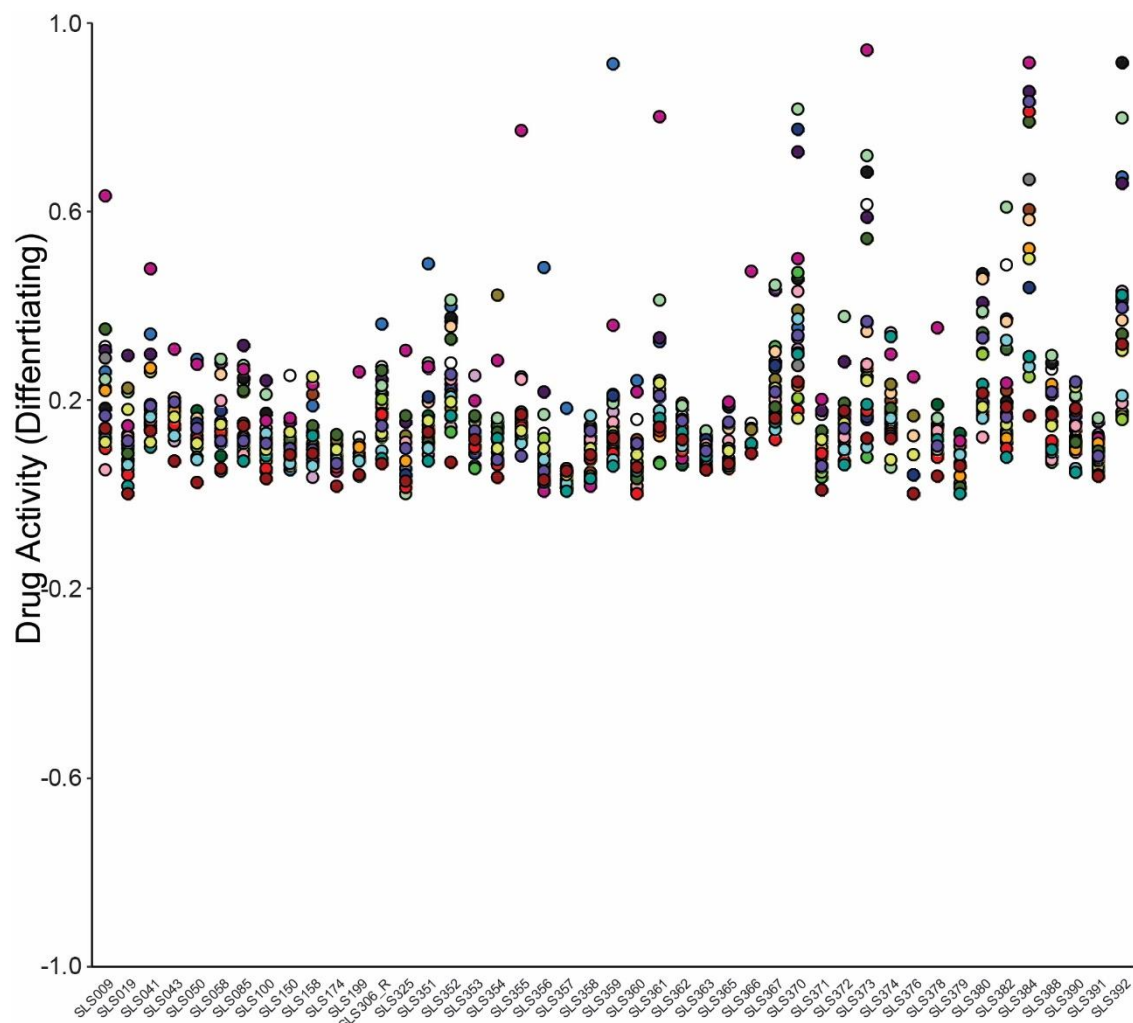

**Combination**

- |                 |                 |
|-----------------|-----------------|
| ○ DNR-ARAC      | ● +MI-2         |
| ● +ACTINO_D     | ● +MIDOSTAURIN  |
| ● +ATRA         | ● +OLAPARIB     |
| ● +CRENOLANIB   | ● +OTX015       |
| ● +DABRAFENIB   | ● +PALBOCICLIB  |
| ● +DACTOLISIB   | ● +PANOBINOSTAT |
| ● +ENASIDENIB   | ● +RUXOLITINIB  |
| ● +EPZ5676      | ● +S63845       |
| ● +GILTERITINIB | ● +SELINEXOR    |
| ● +GLASDEGIB    | ● +ULIXERTINIB  |
| ● +IDASANUTLIN  | ● +UPROSERTIB   |
| ● +IVOSIDENIB   | ● +VENETOCLAX   |

**Supplementary Figure 9.** Heatmap of chemogenomic tests from the DNR-AraC combination screen (**Figure 5**). Colors indicate the difference in the mean combination activity for each output between patients mutated and those wildtype for the given gene or gene group. \*FDR q-value of t test < 0.05.

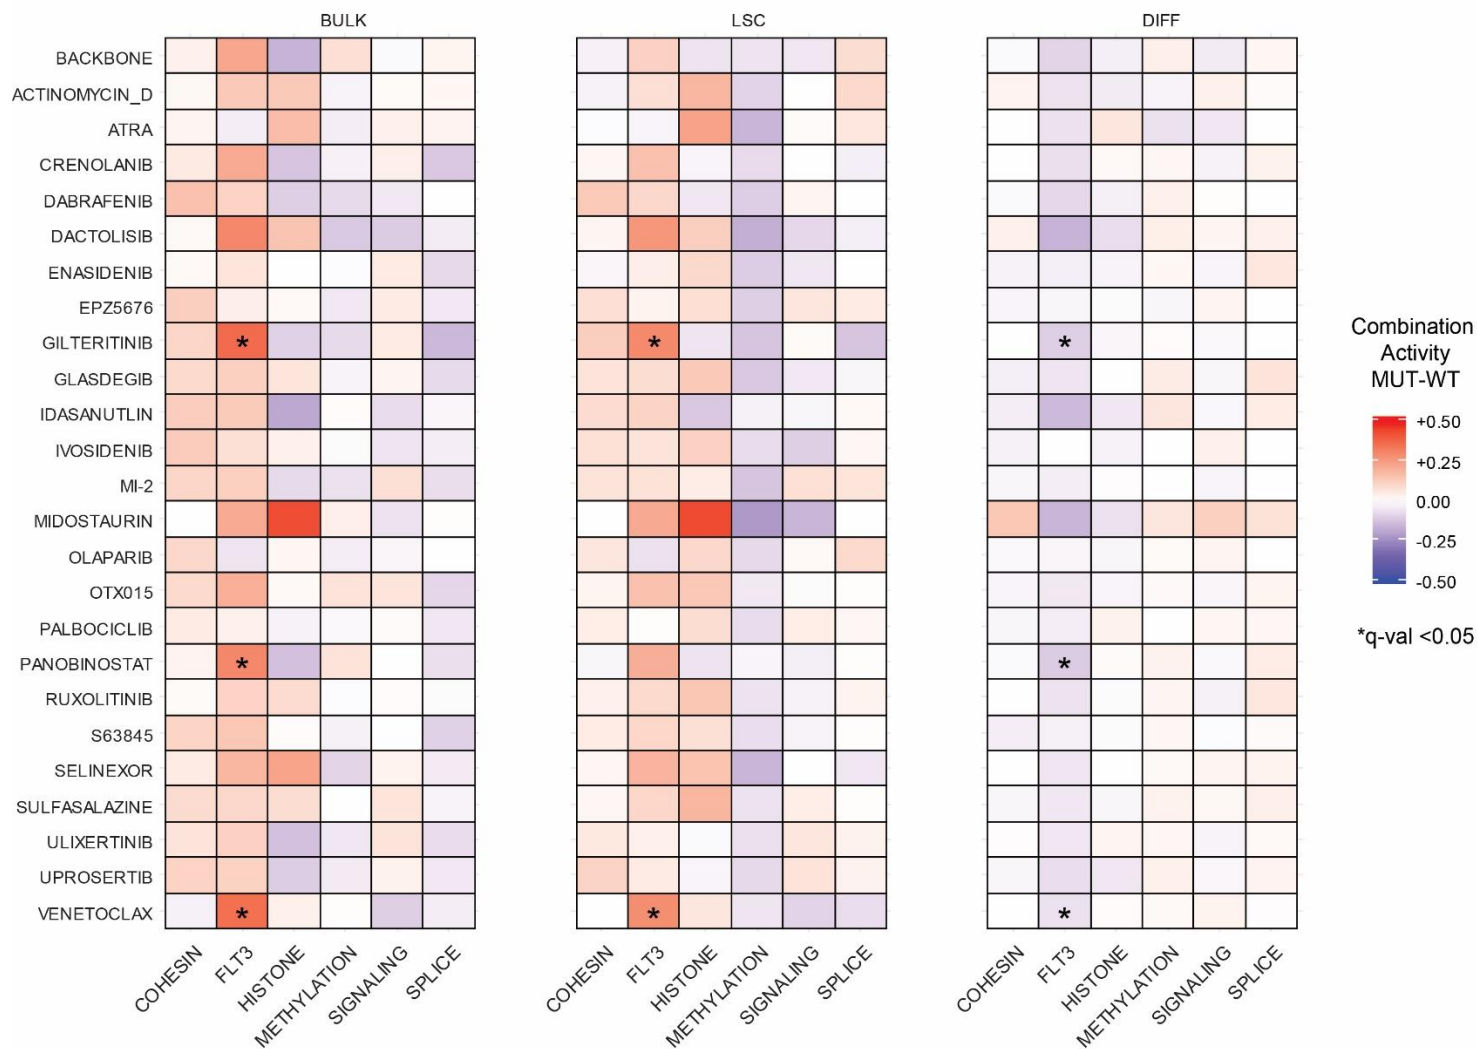

**Supplementary Figure 10.** Histogram of optimal combinations from the DNR-AraC screen (Figure 5) for activity against LSCs.

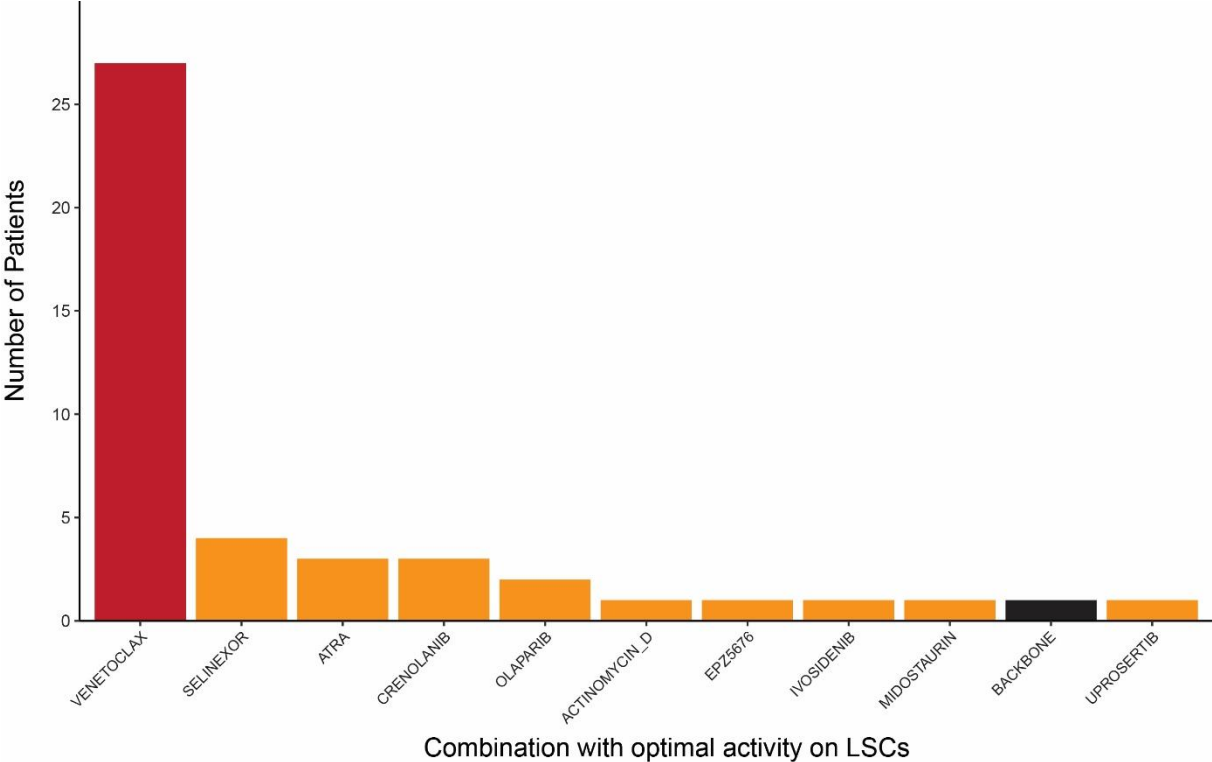

Supplement: 41408_2022_689_MOESM1_ESM.pdf [file 41408_2022_689_MOESM1_ESM.pdf]
