# Supplementary material for: A multiparametric niche-like drug screening platform in acute myeloid leukemia
Source: PubMed Central journal article supplement (PMC9232632; doi:10.1038/s41408-022-00689-3), 2022-06-24
Supplement: 41408_2022_689_MOESM2_ESM.pdf [file 41408_2022_689_MOESM2_ESM.pdf]

**Supplementary Table 1. Patients samples and metadata**

|         | Sex      | Age, years | Stage     | WBC, x10 <sup>9</sup> /L | Source |    |
|---------|----------|------------|-----------|--------------------------|--------|----|
| UPN     | Clinical |            |           |                          |        |    |
| SLS009  | F        | 69         | Diagnosis | 1.5                      | BM     | 89 |
| SLS014  | F        | 56         | Diagnosis | 2.73                     | BM     | 60 |
| SLS019  | F        | 62         | Diagnosis | 35.9                     | BM     | 92 |
| SLS020  | F        | 28         | Diagnosis | 3.28                     | BM     | 63 |
| SLS025  | F        | 34         | Diagnosis | 4.2                      | BM     | 62 |
| SLS032  | M        | 70         | Diagnosis | 13.61                    | BM     | 68 |
| SLS033  | M        | 64         | Diagnosis | 68.01                    | BM     | 90 |
| SLS036  | M        | 29         | Diagnosis | 35.06                    | BM     | 46 |
| SLS037  | M        | 51         | Relapse   | 0.31                     | BM     | 10 |
| SLS041  | F        | 59         | Diagnosis | 39                       | BM     | 93 |
| SLS043  | M        | 29         | Diagnosis | 39.8                     | BM     | 90 |
| SLS048  | F        | 46         | Diagnosis | 5.35                     | BM     | 41 |
| SLS050  | F        | 50         | Diagnosis | 142.6                    | BM     | 90 |
| SLS058  | F        | 75         | Diagnosis | 22                       | BM     | 65 |
| SLS068  | M        | 71         | Diagnosis | 96.73                    | BM     | 45 |
| SLS070  | M        | 35         | Diagnosis | 28.74                    | BM     | 73 |
| SLS083  | F        | 22         | Diagnosis | 20.47                    | BM     | 64 |
| SLS085  | F        | 60         | Diagnosis | 37                       | BM     | 90 |
| SLS094  | M        | 52         | Relapse   | 1.2                      | BM     | 33 |
| SLS095  | F        | 46         | Diagnosis | 1.19                     | BM     | 7  |
| SLS100  | F        | 65         | Diagnosis | 107.4                    | PB     | 99 |
| SLS107  | M        | 22         | Diagnosis | 6.29                     | PB     | 63 |
| SLS110  | M        | 48         | Diagnosis | 16.39                    | BM     | 82 |
| SLS134  | M        | 60         | Diagnosis | 39.7                     | BM     | 67 |
| SLS149  | F        | 27         | Diagnosis | 21                       | BM     | 56 |
| SLS150  | F        | 76         | Diagnosis | 19.8                     | PB     | 19 |
| SLS158  | M        | 59         | Diagnosis | 4.1                      | BM     | 27 |
| SLS174  | F        | 52         | Diagnosis | 6.7                      | BM     | 74 |
| SLS199  | F        | 70         | Diagnosis | 97                       | PB     | 48 |
| SLS244  | M        | 50         | Diagnosis | 99.72                    | BM     | 80 |
| SLS301  | F        | 57         | Relapse   | 4.41                     | PB     | 71 |
| SLS302  | F        | 59         | Diagnosis | 104.98                   | PB     | 79 |
| SLS305  | F        | 78         | Relapse   | 11.29                    | PB     | 25 |
| SLS306  | F        | 47         | Diagnosis | 21.1                     | BM     | 73 |
| SLS306R | F        | 47         | Relapse   | 1.99                     | PB     | 64 |

|        |   |    |           |        |    |    |
|--------|---|----|-----------|--------|----|----|
| SLS325 | F | 61 | Diagnosis | 78.7   | BM | 45 |
| SLS327 | M | 64 | Diagnosis | 254.62 | BM | 92 |
| SLS343 | M | 63 | Diagnosis | 88     | PB | 87 |
| SLS345 | F | 25 | Diagnosis | 28.42  | PB | 59 |
| SLS346 | M | 58 | Diagnosis | 81.26  | BM | 89 |
| SLS351 | F | 16 | Diagnosis | 14.5   | BM | 60 |
| SLS352 | M | 71 | Diagnosis | 4.2    | BM | 82 |
| SLS353 | F | 78 | Diagnosis | 34     | PB | 69 |
| SLS354 | F | 75 | Diagnosis | 117    | PB | 95 |
| SLS355 | M | 70 | Diagnosis | 105.3  | BM | 26 |
| SLS356 | M | 34 | Diagnosis | 125.7  | BM | 87 |
| SLS357 | M | 56 | Diagnosis | 8.1    | PB | 47 |
| SLS358 | M | 58 | Diagnosis | 88     | BM | 94 |
| SLS359 | M | 41 | Diagnosis | 4.7    | PB | 20 |
| SLS360 | F | 69 | Diagnosis | 39.7   | PB | 91 |
| SLS361 | M | 55 | Diagnosis | 68.4   | PB | 82 |
| SLS362 | F | 76 | Diagnosis | 69.7   | PB | 61 |
| SLS363 | M | 72 | Diagnosis | 49     | BM | 77 |
| SLS365 | M | 45 | Diagnosis | 53.4   | BM | 64 |
| SLS366 | F | 20 | Diagnosis | 14.7   | PB | 58 |
| SLS367 | M | 43 | Diagnosis | 59     | BM | 60 |
| SLS370 | M | 51 | Diagnosis | 78     | BM | 81 |
| SLS371 | F | 65 | Diagnosis | 23.5   | PB | 78 |
| SLS372 | M | 73 | Diagnosis | 134    | BM | 48 |
| SLS373 | M | 46 | Diagnosis | 19.8   | BM | 40 |
| SLS374 | M | 60 | Diagnosis | 0.7    | BM | 20 |
| SLS376 | F | 62 | Diagnosis | 136    | PB | 94 |
| SLS378 | M | 68 | Diagnosis | 108    | BM | 94 |
| SLS379 | F | 18 | Diagnosis | 37.7   | BM | 80 |
| SLS380 | F | 37 | Diagnosis | 5.8    | BM | 48 |
| SLS381 | F | 71 | Diagnosis | 49.01  | BM | 90 |
| SLS382 | F | 78 | Diagnosis | 1.7    | PB | 43 |
| SLS384 | F | 68 | Diagnosis | 64.7   | BM | 40 |
| SLS388 | F | 69 | Diagnosis | 146    | BM | 97 |
| SLS389 | M | 48 | Diagnosis | 27.6   | BM | 75 |
| SLS390 | F | 64 | Diagnosis | 293    | BM | 81 |
| SLS391 | M | 73 | Diagnosis | 143    | PB | 97 |
| SLS392 | M | 54 | Diagnosis | 2.3    | PB | 28 |
| SLS393 | F | 76 | Diagnosis | 120    | BM | 80 |

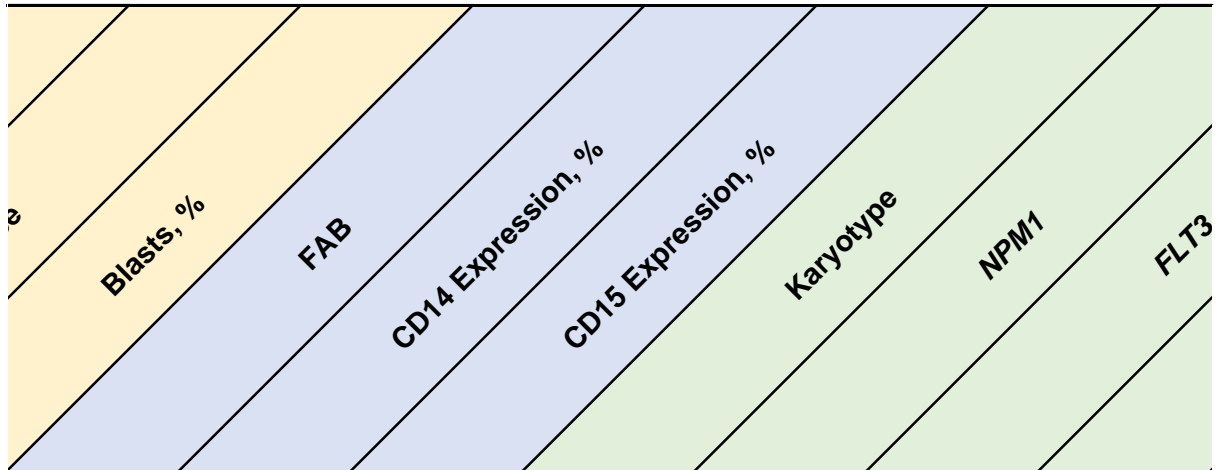

| Differentiation Arrest |    |    | Genetic                     |     |           |      |
|------------------------|----|----|-----------------------------|-----|-----------|------|
| M1                     | 0  | 37 | 46,XX                       | MUT | WT        | NA   |
| M2                     | 0  | 13 | 46,XX,add(11)del(11)        | WT  | WT        |      |
| M1                     | 0  | 11 | 46,XX                       | MUT | ITD       | 1    |
| M2                     | 0  | 26 | 46,XX,t(21)(q22;q22)        | WT  | WT        |      |
| M2                     | 0  | 6  | 46,XX,t(6;9)(p22;p11)       | WT  | ITD       | 0.82 |
| M0                     | 0  | 1  | 46,XX,del(13)(q13)          | WT  | WT        |      |
| M5                     | 20 | 43 | 46,XX,t(2;4)(q27;q27)       | WT  | ITD       | 0.3  |
| M4Eo                   | 3  | 8  | 46,XX,inv(16)(p13q22)       | WT  | WT        |      |
| NA                     | 1  | 82 | 46,XY                       | WT  | WT        |      |
| M5                     | 5  | 87 | 46,XX                       | MUT | ITD       | 0.5  |
| M1                     | 0  | 11 | 46,XY                       | MUT | ITD & TKD | 0.66 |
| M4Eo                   | 4  | 29 | 46,XX,inv(16)(p13q22)       | WT  | WT        |      |
| M1                     | 0  | 60 | 46,XX                       | MUT | ITD       | 0.65 |
| M2                     | 0  | 8  | 46,XX,+4                    | MUT | WT        | NA   |
| M4                     | 1  | 8  | 46,XY                       | WT  | ITD       | 0.48 |
| M4Eo                   | 0  | 54 | 46,XY,inv(16)(p13q22)       | WT  | WT        |      |
| M4Eo                   | 10 | 41 | 46,XX,inv(16)(p13q22)       | WT  | WT        |      |
| M5                     | 44 | 87 | 46,XX                       | MUT | WT        | NA   |
| NA                     | 2  | 42 | 46,XX,-17,+mar              | WT  | WT        |      |
| NA                     | 2  | 9  | NA                          | WT  | WT        |      |
| M1                     | 0  | 1  | 46,XX                       | MUT | WT        | NA   |
| M5                     | 3  | 98 | 46,XX,der(9)t(2;9)(p11;p11) | WT  | WT        |      |
| M1                     | 0  | 97 | 46,XY                       | WT  | WT        |      |
| NA                     | 10 | 0  | 46,XY                       | WT  | WT        |      |
| M4Eo                   | 0  | 0  | 46,XX,inv(16)(p13q22)       | WT  | WT        |      |
| M4                     | 0  | 0  | 46,XX                       | MUT | TKD       | NA   |
| M2                     | 0  | 0  | 46,XY                       | WT  | WT        | NA   |
| M1                     | 0  | 0  | 46,XX                       | MUT | ITD       | 0.1  |
| M1                     | 0  | 0  | 46,XX                       | MUT | ITD       | 1.5  |
| M5                     | 0  | 0  | 46,XY                       | MUT | WT        |      |
| M5                     | 0  | 0  | 46,XX,del(15)(q14)          | MUT | WT        |      |
| M1                     | 0  | 0  | 46,XX                       | MUT | WT        |      |
| M5                     | 11 | 90 | 47,XX,+4                    | MUT | WT        |      |
| M2                     | 0  | 0  | 46,XX                       | MUT | ITD       | 0.36 |
| M1                     | 0  | 0  | 46,XX,del(5)add(5)(p15)     | MUT | ITD       | 8.7  |

|    |    |    |                         |     |           |      |
|----|----|----|-------------------------|-----|-----------|------|
| M2 | 1  | 27 | 46,XX                   | MUT | WT        | NA   |
| M5 | 0  | 8  | 46,XY                   | MUT | ITD       | 0.49 |
| M4 | 0  | 0  | 47XY, +8                | MUT | ITD       | 0.58 |
| M4 | 0  | 0  | 46,XX                   | MUT | ITD & TKD | 0.05 |
| M1 | 0  | 0  | 46,XX, del(20)(q11)     | WT  | ITD       | 0.19 |
| M2 | 0  | 15 | 46XX, t(5;11)           | WT  | WT        | NA   |
| M4 | 18 | 60 | 46,XY                   | WT  | WT        | NA   |
| M1 | 0  | 7  | 46XX, t(6;9)            | MUT | WT        | NA   |
| M1 | 0  | 6  | 46,XX                   | MUT | ITD       | 0.86 |
| M2 | 0  | 0  | 46,XY                   | WT  | WT        | NA   |
| M5 | 0  | 0  | 46,XY                   | WT  | ITD       | 0.6  |
| M2 | 1  | 2  | 46,XY, t(6;21)(q24;q22) | WT  | WT        | NA   |
| M5 | 15 | 53 | 46,XY, t(10;11); 47X    | WT  | WT        | NA   |
| M4 | 0  | 0  | 46,XY, del(7)(q3?2),-   | WT  | WT        | NA   |
| M1 | 0  | 0  | 46,XX                   | MUT | ITD       | 0.4  |
| M2 | 1  | 0  | 46,XY                   | MUT | ITD       | 0.68 |
| M4 | 0  | 0  | 46,XX                   | MUT | WT        | NA   |
| M1 | 1  | 21 | 46,XY                   | MUT | ITD       | 0.9  |
| M4 | 0  | 26 | 46,XY                   | MUT | TKD       | NA   |
| M2 | 0  | 20 | 46,XX                   | MUT | WT        | NA   |
| M4 | 3  | 25 | 46,XY                   | MUT | WT        | NA   |
| M5 | 55 | 86 | 46XY, isoc 4p           | MUT | TKD       | NA   |
| M2 | 0  | 5  | 46,XX                   | MUT | TKD       | NA   |
| M4 | 0  | 0  | 46,XY                   | MUT | WT        | NA   |
| M4 | 10 | 98 | 46,XY                   | MUT | WT        | NA   |
| M1 | 0  | 0  | 46XY, +Y                | MUT | WT        | NA   |
| M1 | 0  | 0  | 46,XX                   | MUT | ITD       | 0.9  |
| M1 | 0  | 0  | 46,XY                   | MUT | ITD       | 0.26 |
| M5 | 2  | 35 | 46,XX                   | MUT | TKD       | NA   |
| M4 | 0  | 35 | 46,XX                   | MUT | WT        | NA   |
| M1 | 0  | 1  | 46,XX                   | MUT | WT        |      |
| M1 | 0  | 0  | 46,XX                   | MUT | WT        | NA   |
| M4 | 0  | 17 | 46,XX                   | MUT | WT        | NA   |
| M1 | 0  | 1  | 46,XX                   | MUT | ITD       | 0.55 |
| M5 | 42 | 92 | 46,XY                   | MUT | WT        |      |
| M5 | 51 | 43 | 46,XX                   | MUT | WT        | NA   |
| M1 | 0  | 0  | 46,XY                   | MUT | ITD       | 0.02 |
| M2 | 0  | 0  | 46XY, del17p            | MUT | WT        | NA   |
| M4 | NA | NA | 46,XX                   | MUT | ITD       | 0.66 |

|                       |      |      |                        |                |          |            |
|-----------------------|------|------|------------------------|----------------|----------|------------|
| FLT3-ITD Allele Ratio | IDH1 | IDH2 | ELN 2017 Risk Category | EOI Evaluation | NPM1_MRD | EFS_Time / |
|-----------------------|------|------|------------------------|----------------|----------|------------|

|     |       |     | Outcome |          |      |   |
|-----|-------|-----|---------|----------|------|---|
| WT  | WT    | Fav | CR      | 0.000036 | 1234 | 0 |
| WT  | WT    | Int |         |          |      |   |
| MUT | WT    | Int | CR      | 0.0001   | 731  | 1 |
| WT  | WT    | Fav |         |          |      |   |
| WT  | WT    | Adv |         |          |      |   |
| WT  | WT    | Int |         |          |      |   |
| WT  | WT    | Int |         |          |      |   |
| WT  | WT    | Fav |         |          |      |   |
| WT  | WT    | Fav |         |          |      |   |
| WT  | WT    | Int | CR      | NA       | 546  | 0 |
| WT  | R140Q | Int | CR      | 0.000001 | 159  | 0 |
| WT  | WT    | Fav |         |          |      |   |
| WT  | WT    | Int | CR      | 0.0012   | 1158 | 0 |
| WT  | WT    | Fav | CR      | NA       | 1182 | 0 |
| WT  | WT    | Int |         |          |      |   |
| WT  | WT    | Fav |         |          |      |   |
| WT  | WT    | Fav |         |          |      |   |
| MUT | WT    | Fav | CR      | NA       | 999  | 1 |
| WT  | WT    | Adv |         |          |      |   |
| WT  | WT    | NA  |         |          |      |   |
| MUT | WT    | Fav | ED      | NA       | 2    | 1 |
| WT  | WT    | Int |         |          |      |   |
| WT  | WT    | Fav |         |          |      |   |
| WT  | WT    | Fav |         |          |      |   |
| WT  | WT    | Fav |         |          |      |   |
| WT  | WT    | Fav | CR      | 0.000001 | 835  | 0 |
| WT  | R140Q | Adv | MLFS    | NA       | 49   | 1 |
| WT  | R140Q | Int | PIF     | NA       | 79   | 1 |
| WT  | WT    | Int | PIF     | NA       | 47   | 1 |
| WT  | WT    | Fav |         |          |      |   |
| WT  | WT    | Int |         |          |      |   |
| WT  | R140Q | Fav |         |          |      |   |
| WT  | WT    | Fav |         |          |      |   |
| WT  | WT    | Fav | CR      | 0.0043   | 159  | 1 |
| WT  | WT    | Int |         |          |      |   |

|     |       |     |     |          |      |   |
|-----|-------|-----|-----|----------|------|---|
| WT  | WT    | Fav | CR  | 0.000061 | 290  | 1 |
| NA  | NA    | Fav |     |          |      |   |
| WT  | WT    | Int |     |          |      |   |
| WT  | WT    | Fav |     |          |      |   |
| WT  | WT    | Int |     |          |      |   |
| WT  | WT    | Adv | PIF | NA       | 70   | 1 |
| WT  | R140Q | Adv | PIF | NA       | 42   | 1 |
| WT  | WT    | Fav | PIF | NA       | 63   | 1 |
| MUT | WT    | Int | CR  | 0.000001 | 469  | 1 |
| WT  | WT    | Adv | PIF | NA       | 52   | 1 |
| WT  | WT    | Adv | PIF | NA       | 37   | 1 |
| WT  | WT    | Int | ED  | NA       | 20   | 1 |
| WT  | WT    | Adv | ED  | NA       | 20   | 1 |
| WT  | WT    | Adv | PIF | NA       | 44   | 1 |
| WT  | WT    | Int | ED  | NA       | 30   | 1 |
| WT  | WT    | Int | CR  | 0.000001 | 203  | 0 |
| MUT | WT    | Fav | CR  | 0.00032  | 852  | 1 |
| MUT | WT    | Int | CR  | NA       | 378  | 1 |
| MUT | WT    | Fav | CR  | 0.00006  | 870  | 1 |
| WT  | WT    | Fav | CR  | 0.000001 | 686  | 0 |
| WT  | WT    | Fav | CR  | 0.0046   | 171  | 0 |
| WT  | WT    | Fav | CR  | 0.0075   | 142  | 0 |
| WT  | WT    | Fav | CR  | NA       | 335  | 1 |
| WT  | WT    | Fav | CR  | 0.000001 | 517  | 1 |
| WT  | WT    | Fav | CR  | 0.0016   | 397  | 1 |
| WT  | WT    | Fav | CR  | 0.0063   | 1219 | 0 |
| WT  | WT    | Adv | CR  | NA       | 632  | 1 |
| WT  | R140Q | Fav | CR  | NA       | 849  | 1 |
| MUT | WT    | Fav | CR  | 0.07     | 179  | 1 |
| WT  | WT    | Int | CR  | 0.000001 | 295  | 1 |
| NA  | NA    | Fav |     |          |      |   |
| MUT | WT    | Fav | CR  | 0.000001 | 588  | 1 |
| WT  | R140Q | Fav | CR  | NA       | 335  | 1 |
| WT  | WT    | Int | ED  | NA       | 15   | 1 |
| NA  | NA    | Fav |     |          |      |   |
| WT  | WT    | Fav | ED  | NA       | 22   | 1 |
| WT  | R140Q | Fav | ED  | NA       | 24   | 1 |
| WT  | WT    | Int | CR  | 0.000001 | 125  | 0 |
| WT  | WT    | Int |     |          |      |   |

|        |           |                   |        |                        |                    |                  |                        |      |
|--------|-----------|-------------------|--------|------------------------|--------------------|------------------|------------------------|------|
| (days) | EFS_event | LSC_count_ex_vivo | LTC-IC | drug_response_patterns | plasma_amino_acids | plasma_cytokines | conditioned_medium_ami | nick |
|--------|-----------|-------------------|--------|------------------------|--------------------|------------------|------------------------|------|

| Experiments |   |   |   |   |   |   |  |
|-------------|---|---|---|---|---|---|--|
|             |   |   | X | X |   |   |  |
|             |   |   | X | X |   |   |  |
|             | X |   | X | X |   |   |  |
|             | X |   | X | X |   |   |  |
|             |   |   | X |   |   |   |  |
|             |   |   | X | X |   |   |  |
|             |   |   | X | X |   |   |  |
|             |   |   | X | X |   |   |  |
|             |   |   | X | X |   |   |  |
|             |   |   |   |   | X |   |  |
|             |   |   | X |   | X |   |  |
|             |   |   | X | X |   |   |  |
|             |   |   | X | X | X | X |  |
|             |   |   |   |   | X |   |  |
|             |   |   | X |   |   |   |  |
|             |   |   | X | X |   |   |  |
|             |   |   | X | X |   |   |  |
|             |   |   | X | X |   |   |  |
|             |   |   | X | X |   |   |  |
|             |   |   | X | X |   |   |  |
|             |   |   | X | X |   |   |  |
|             |   |   | X | X |   |   |  |
|             |   |   | X | X | X |   |  |
|             |   |   |   |   |   |   |  |
|             |   |   |   |   |   |   |  |
|             |   | X |   |   |   |   |  |
| X           |   |   |   |   |   |   |  |
|             |   | X |   |   |   |   |  |
|             |   |   |   |   |   |   |  |
|             |   | X |   |   |   |   |  |





|                                  |
|----------------------------------|
| amino_acids_cytokines            |
| cell-like_components_mini-screen |
| DNA-Seq                          |
| RNA-Seq                          |
| sc-RNA-Seq                       |
| DNR-ARAC_Screen                  |

|   |   |  |   |
|---|---|--|---|
|   |   |  | X |
|   |   |  |   |
|   |   |  | X |
|   |   |  |   |
|   |   |  |   |
|   |   |  |   |
|   |   |  |   |
|   |   |  |   |
|   |   |  | X |
|   |   |  | X |
|   |   |  |   |
|   |   |  | X |
|   |   |  | X |
|   |   |  |   |
|   |   |  |   |
|   |   |  |   |
|   |   |  | X |
|   |   |  |   |
|   |   |  |   |
|   |   |  |   |
|   |   |  | X |
| X |   |  | X |
|   |   |  | X |
|   |   |  | X |
|   | X |  |   |
|   |   |  |   |
|   |   |  |   |
|   |   |  |   |
|   |   |  | X |
|   |   |  |   |

|   |   |   |   |
|---|---|---|---|
| X |   |   | X |
|   |   |   |   |
|   |   |   |   |
|   |   |   |   |
| X |   |   | X |
| X |   |   | X |
| X |   |   | X |
|   | X |   | X |
| X |   |   | X |
| X |   |   | X |
|   |   |   | X |
|   |   |   | X |
|   |   |   | X |
|   |   |   | X |
|   |   |   | X |
|   |   |   | X |
|   |   |   | X |
|   |   |   | X |
|   |   |   | X |
|   |   |   | X |
|   |   |   | X |
|   |   |   | X |
|   |   |   | X |
|   |   |   | X |
|   |   |   | X |
|   |   |   | X |
|   |   |   | X |
|   |   |   | X |
|   |   |   | X |
|   |   |   | X |
|   |   |   | X |
|   |   |   | X |
|   |   |   | X |
|   | X |   |   |
|   |   |   | X |
|   |   |   | X |
|   |   |   | X |
|   | X |   |   |
|   |   |   | X |
|   |   |   | X |
|   |   |   | X |
|   |   | X |   |

**Supplementary Table 2. Gene m**

| <b>UPN</b> | <b>GENE</b>   |
|------------|---------------|
| SLS361     | <i>BRCC3</i>  |
| SLS361     | <i>NPM1</i>   |
| SLS361     | <i>TET2</i>   |
| SLS361     | <i>SRSF2</i>  |
| SLS361     | <i>PRPF8</i>  |
| SLS380     | <i>WT1</i>    |
| SLS380     | <i>WT1</i>    |
| SLS380     | <i>WT1</i>    |
| SLS380     | <i>FLT3</i>   |
| SLS380     | <i>NPM1</i>   |
| SLS380     | <i>DNMT3A</i> |
| SLS390     | <i>NPM1</i>   |
| SLS390     | <i>RAD21</i>  |
| SLS390     | <i>DNMT3A</i> |
| SLS390     | <i>CBL</i>    |
| SLS325     | <i>TET2</i>   |
| SLS325     | <i>SRSF2</i>  |
| SLS325     | <i>DNMT3A</i> |
| SLS325     | <i>NRAS</i>   |
| SLS325     | <i>NPM1</i>   |
| SLS325     | <i>CEBPA</i>  |
| SLS371     | <i>SMC1A</i>  |
| SLS371     | <i>NPM1</i>   |
| SLS371     | <i>FLT3</i>   |
| SLS373     | <i>SMC3</i>   |
| SLS373     | <i>RIT1</i>   |
| SLS373     | <i>NPM1</i>   |
| SLS352     | <i>SRSF2</i>  |
| SLS352     | <i>IDH2</i>   |
| SLS352     | <i>ASXL1</i>  |
| SLS367     | <i>NRAS</i>   |
| SLS367     | <i>NPM1</i>   |
| SLS370     | <i>PTPN11</i> |
| SLS370     | <i>TET2</i>   |
| SLS370     | <i>FLT3</i>   |
| SLS370     | <i>NPM1</i>   |
| SLS384     | <i>CEBPA</i>  |
| SLS384     | <i>NPM1</i>   |
| SLS384     | <i>IDH2</i>   |
| SLS384     | <i>SRSF2</i>  |
| SLS379     | <i>SMC3</i>   |
| SLS379     | <i>FLT3</i>   |
| SLS379     | <i>NPM1</i>   |
| SLS379     | <i>IDH1</i>   |
| SLS376     | <i>SMC1A</i>  |
| SLS376     | <i>TP53</i>   |
| SLS376     | <i>KRAS</i>   |

|        |                    |
|--------|--------------------|
| SLS305 | <i>NPM1</i>        |
| SLS009 | <i>GATA2</i>       |
| SLS009 | <i>TET2</i>        |
| SLS009 | <i>TET2</i>        |
| SLS009 | <i>NPM1</i>        |
| SLS354 | <i>FLT3</i>        |
| SLS354 | <i>NPM1</i>        |
| SLS354 | <i>NF1</i>         |
| SLS354 | <i>DNMT3A</i>      |
| SLS354 | <i>IDH1</i>        |
| SLS354 | <i>KIT</i>         |
| SLS014 | <i>NO_MUTATION</i> |
| SLS019 | <i>FLT3</i>        |
| SLS019 | <i>IDH1</i>        |
| SLS019 | <i>DNMT3A</i>      |
| SLS019 | <i>NPM1</i>        |
| SLS019 | <i>FLT3</i>        |
| SLS020 | <i>RAD21</i>       |
| SLS020 | <i>EZH2</i>        |
| SLS020 | <i>EZH2</i>        |
| SLS020 | <i>WT1</i>         |
| SLS025 | <i>FLT3</i>        |
| SLS366 | <i>WT1</i>         |
| SLS366 | <i>WT1</i>         |
| SLS366 | <i>NRAS</i>        |
| SLS366 | <i>NPM1</i>        |
| SLS366 | <i>TET2</i>        |
| SLS032 | <i>NRAS</i>        |
| SLS032 | <i>NRAS</i>        |
| SLS032 | <i>SF3B1</i>       |
| SLS032 | <i>EP300</i>       |
| SLS032 | <i>BCORL1</i>      |
| SLS032 | <i>STAG2</i>       |
| SLS033 | <i>DNMT3A</i>      |
| SLS033 | <i>FLT3</i>        |
| SLS036 | <i>NRAS</i>        |
| SLS365 | <i>PTPN11</i>      |
| SLS365 | <i>FLT3</i>        |
| SLS365 | <i>IDH1</i>        |
| SLS365 | <i>NPM1</i>        |
| SLS041 | <i>NPM1</i>        |
| SLS041 | <i>FLT3</i>        |
| SLS041 | <i>SF3B1</i>       |
| SLS043 | <i>FLT3</i>        |
| SLS043 | <i>NPM1</i>        |
| SLS043 | <i>IDH2</i>        |
| SLS048 | <i>NRAS</i>        |
| SLS048 | <i>WT1</i>         |
| SLS050 | <i>NPM1</i>        |
| SLS050 | <i>DNMT3A</i>      |

|        |                    |
|--------|--------------------|
| SLS351 | <i>RUNX1</i>       |
| SLS351 | <i>PTPN11</i>      |
| SLS058 | <i>STAG2</i>       |
| SLS058 | <i>NPM1</i>        |
| SLS058 | <i>FLT3</i>        |
| SLS357 | <i>KRAS</i>        |
| SLS357 | <i>NRAS</i>        |
| SLS357 | <i>PTPN11</i>      |
| SLS357 | <i>SMC3</i>        |
| SLS357 | <i>PTPN11</i>      |
| SLS357 | <i>SF3B1</i>       |
| SLS068 | <i>FLT3</i>        |
| SLS068 | <i>DNMT3A</i>      |
| SLS068 | <i>SRSF2</i>       |
| SLS083 | <i>BCORL1</i>      |
| SLS085 | <i>FLT3</i>        |
| SLS085 | <i>KRAS</i>        |
| SLS085 | <i>PTPN11</i>      |
| SLS085 | <i>NF1</i>         |
| SLS085 | <i>IDH1</i>        |
| SLS085 | <i>DNMT3A</i>      |
| SLS085 | <i>NPM1</i>        |
| SLS085 | <i>RAD21</i>       |
| SLS085 | <i>DNMT3A</i>      |
| SLS353 | <i>NPM1</i>        |
| SLS353 | <i>TET2</i>        |
| SLS353 | <i>TET2</i>        |
| SLS353 | <i>DNMT3A</i>      |
| SLS388 | <i>FLT3</i>        |
| SLS388 | <i>NPM1</i>        |
| SLS388 | <i>TET2</i>        |
| SLS100 | <i>IDH1</i>        |
| SLS100 | <i>DNMT3A</i>      |
| SLS100 | <i>NPM1</i>        |
| SLS107 | <i>NO_MUTATION</i> |
| SLS374 | <i>U2AF1</i>       |
| SLS374 | <i>BRAF</i>        |
| SLS374 | <i>NPM1</i>        |
| SLS374 | <i>STAG2</i>       |
| SLS374 | <i>PHF6</i>        |
| SLS110 | <i>TET2</i>        |
| SLS110 | <i>GATA2</i>       |
| SLS110 | <i>CEBPA</i>       |
| SLS110 | <i>CEBPA</i>       |
| SLS363 | <i>FLT3</i>        |
| SLS363 | <i>IDH1</i>        |
| SLS363 | <i>NPM1</i>        |
| SLS363 | <i>DNMT3A</i>      |
| SLS358 | <i>KRAS</i>        |
| SLS358 | <i>NRAS</i>        |

|        |               |
|--------|---------------|
| SLS134 | <i>CEBPA</i>  |
| SLS134 | <i>TET2</i>   |
| SLS134 | <i>CEBPA</i>  |
| SLS134 | <i>CSF3R</i>  |
| SLS378 | <i>FLT3</i>   |
| SLS378 | <i>CSF3R</i>  |
| SLS378 | <i>SRSF2</i>  |
| SLS378 | <i>IDH2</i>   |
| SLS378 | <i>NPM1</i>   |
| SLS149 | <i>NRAS</i>   |
| SLS149 | <i>NRAS</i>   |
| SLS150 | <i>WT1</i>    |
| SLS150 | <i>FLT3</i>   |
| SLS150 | <i>FLT3</i>   |
| SLS150 | <i>NPM1</i>   |
| SLS150 | <i>DNMT3A</i> |
| SLS158 | <i>DNMT3A</i> |
| SLS158 | <i>IDH2</i>   |
| SLS158 | <i>SRSF2</i>  |
| SLS158 | <i>ASXL1</i>  |
| SLS174 | <i>FLT3</i>   |
| SLS174 | <i>NPM1</i>   |
| SLS174 | <i>IDH2</i>   |
| SLS362 | <i>PTPN11</i> |
| SLS362 | <i>IDH1</i>   |
| SLS362 | <i>DNMT3A</i> |
| SLS362 | <i>NPM1</i>   |
| SLS382 | <i>IDH1</i>   |
| SLS382 | <i>NPM1</i>   |
| SLS392 | <i>WT1</i>    |
| SLS392 | <i>PTPN11</i> |
| SLS392 | <i>NPM1</i>   |
| SLS392 | <i>STAG2</i>  |
| SLS199 | <i>PHF6</i>   |
| SLS199 | <i>FLT3</i>   |
| SLS199 | <i>WT1</i>    |
| SLS199 | <i>NPM1</i>   |
| SLS199 | <i>FLT3</i>   |
| SLS360 | <i>FLT3</i>   |
| SLS360 | <i>RAD21</i>  |
| SLS360 | <i>EP300</i>  |
| SLS360 | <i>NPM1</i>   |
| SLS360 | <i>DNMT3A</i> |
| SLS356 | <i>FLT3</i>   |
| SLS356 | <i>FLT3</i>   |
| SLS356 | <i>DNMT3A</i> |
| SLS356 | <i>BCOR</i>   |
| SLS359 | <i>TP53</i>   |
| SLS391 | <i>NRAS</i>   |
| SLS391 | <i>FLT3</i>   |

|         |                    |
|---------|--------------------|
| SLS391  | <i>FLT3</i>        |
| SLS391  | <i>NPM1</i>        |
| SLS391  | <i>SRSF2</i>       |
| SLS391  | <i>IDH2</i>        |
| SLS355  | <i>RUNX1</i>       |
| SLS355  | <i>EZH2</i>        |
| SLS355  | <i>SF3B1</i>       |
| SLS355  | <i>DNMT3A</i>      |
| SLS355  | <i>CBL</i>         |
| SLS372  | <i>CBL</i>         |
| SLS372  | <i>KRAS</i>        |
| SLS372  | <i>NPM1</i>        |
| SLS372  | <i>ASXL1</i>       |
| SLS372  | <i>TET2</i>        |
| SLS372  | <i>SRSF2</i>       |
| SLS372  | <i>TET2</i>        |
| SLS372  | <i>CBL</i>         |
| SLS244  | <i>EZH2</i>        |
| SLS244  | <i>PTPN11</i>      |
| SLS244  | <i>NRAS</i>        |
| SLS244  | <i>NPM1</i>        |
| SLS244  | <i>DNMT3A</i>      |
| SLS306  | <i>FLT3</i>        |
| SLS306  | <i>SMC3</i>        |
| SLS306  | <i>DNMT3A</i>      |
| SLS306  | <i>NPM1</i>        |
| SLS302  | <i>NPM1</i>        |
| SLS302  | <i>IDH2</i>        |
| SLS306R | <i>FLT3</i>        |
| SLS306R | <i>NPM1</i>        |
| SLS306R | <i>SMC3</i>        |
| SLS306R | <i>DNMT3A</i>      |
| SLS070  | <i>NO_MUTATION</i> |
| SLS037  | <i>CEBPA</i>       |
| SLS037  | <i>CEBPA</i>       |
| SLS095  | <i>NO_MUTATION</i> |
| SLS094  | <i>WT1</i>         |
| SLS094  | <i>WT1</i>         |
| SLS094  | <i>WT1</i>         |
| SLS094  | <i>NRAS</i>        |
| SLS301  | <i>RAD21</i>       |
| SLS301  | <i>CUX1</i>        |
| SLS301  | <i>NRAS</i>        |
| SLS301  | <i>DNMT3A</i>      |
| SLS301  | <i>KIT</i>         |
| SLS301  | <i>GATA2</i>       |
| SLS301  | <i>NPM1</i>        |
| SLS343  | <i>DNMT3A</i>      |
| SLS343  | <i>FLT3</i>        |
| SLS343  | <i>NPM1</i>        |

|        |               |
|--------|---------------|
| SLS345 | <i>FLT3</i>   |
| SLS345 | <i>FLT3</i>   |
| SLS345 | <i>WT1</i>    |
| SLS345 | <i>FLT3</i>   |
| SLS345 | <i>NPM1</i>   |
| SLS393 | <i>TET2</i>   |
| SLS393 | <i>TET2</i>   |
| SLS393 | <i>DNMT3A</i> |
| SLS393 | <i>FLT3</i>   |
| SLS393 | <i>NPM1</i>   |



**Mutations identified by targeted sequencing**

| <b>MUTATION</b>                                                    |
|--------------------------------------------------------------------|
| BRCC3:NM_024332:exon1:c.C47T:p.S16F                                |
| NPM1:NM_002520:exon11:c.859_860insTCTG:p.L287fs                    |
| TET2:NM_001127208:exon3:c.C1648T:p.R550X                           |
| SRSF2:NM_003016:exon1:c.C284T:p.P95L                               |
| PRPF8:NM_006445:exon10:c.T1376C:p.L459P                            |
| WT1:NM_024426:exon1:c.C338T:p.A113V                                |
| WT1:NM_024426:exon1:c.G337C:p.A113P                                |
| WT1:NM_024426:exon1:c.322_334del:p.F108fs                          |
| FLT3:NM_004119:exon16:c.G1992T:p.M664I                             |
| NPM1:NM_002520:exon11:c.861_862insTGTA:p.L287fs                    |
| DNMT3A:NM_175629:exon19:c.C2309T:p.S770L                           |
| NPM1:NM_002520:exon11:c.861_862insTGTA:p.L287fs                    |
| RAD21:NM_006265:splice                                             |
| DNMT3A:NM_175629:exon18:c.T2147A:p.V716D                           |
| CBL:NM_005188:exon8:c.T1139C:p.L380P                               |
| TET2:NM_001127208:exon6:c.A3656G:p.H1219R                          |
| SRSF2:NM_003016:exon1:c.C284A:p.P95H                               |
| DNMT3A:NM_175629:exon8:c.T887G:p.V296G                             |
| NRAS:NM_002524:exon2:c.G35A:p.G12D                                 |
| NPM1:NM_002520:exon11:c.863_864insCATG:p.L287fs                    |
| CEBPA:NM_004364:exon1:c.751dupA:p.S251fs                           |
| SMC1A:NM_006306:exon13:c.2082_2117del:p.694_706del                 |
| NPM1:NM_002520:exon11:c.859_860insTCTG:p.L287fs                    |
| FLT3:NM_004119:exon20:c.G2503T:p.D835Y                             |
| SMC3:NM_005445:exon15:c.1461_1463del:p.487_488del                  |
| RIT1:NM_001256820:exon3:c.G121A:p.A41T                             |
| NPM1:NM_002520:exon11:c.859_860insTCTG:p.L287fs                    |
| SRSF2:NM_003016:exon1:c.C284A:p.P95H                               |
| IDH2:NM_002168:exon4:c.G419A:p.R140Q                               |
| ASXL1:NM_015338:exon12:c.2254dupG:p.V751fs                         |
| NRAS:NM_002524:exon2:c.G35T:p.G12V                                 |
| NPM1:NM_002520:exon11:c.861_862insTGCA:p.L287fs                    |
| PTPN11:NM_002834:exon3:c.A182C:p.D61A                              |
| TET2:NM_001127208:exon3:c.1553dupT:p.I518fs                        |
| FLT3:NM_004119:exon20:c.G2503T:p.D835Y                             |
| NPM1:NM_002520:exon11:c.861_862insTGCA:p.L287fs                    |
| CEBPA:NM_004364:exon1:c.201_202insCTAC:p.I68fs                     |
| NPM1:NM_002520:exon9:c.761_771del:p.S254fs                         |
| IDH2:NM_002168:exon4:c.G419A:p.R140Q                               |
| SRSF2:NM_003016:exon1:c.C284G:p.P95R                               |
| SMC3:NM_005445:exon13:c.A1133C:p.K378T                             |
| FLT3:NM_004119:exon20:c.2502_2504del:p.834_835del                  |
| NPM1:NM_002520:exon11:c.859_860insTCTG:p.L287fs                    |
| IDH1:NM_005896:exon4:c.G395A:p.R132H                               |
| SMC1A:NM_006306:exon4:c.G413A:p.G138D                              |
| TP53:NM_001126112:exon8:c.834_846delinsCTTTTCGC:p.278_282delinsPFR |
| KRAS:NM_033360:exon2:c.G35A:p.G12D                                 |

|                                                                           |
|---------------------------------------------------------------------------|
| NPM1:NM_002520:exon11:c.859_860insTCTG:p.L287fs                           |
| GATA2:NM_032638:exon5:c.1096_1097insCCAACG:p.G366delinsANG                |
| TET2:NM_001127208:exon3:c.1606_1607del:p.K536fs                           |
| TET2:NM_001127208:exon7:c.G3866A:p.C1289Y                                 |
| NPM1:NM_002520:exon11:c.859_860insTCTG:p.L287fs                           |
| 3:NM_004119:exon14:c.1792_1793insGCCTTGATTTTCAGAGAATATG:p.E598delinsGLDFR |
| NPM1:NM_002520:exon11:c.859_860insTCTG:p.L287fs                           |
| NF1:NM_001042492:exon42:c.C6247T:p.R2083C                                 |
| DNMT3A:NM_022552:exon15:c.1742_1743delinsCT:p.W581S                       |
| IDH1:NM_005896:exon4:c.C394T:p.R132C                                      |
| KIT:NM_000222:exon17:c.T2377A:p.L793M                                     |
| NO_MUTATION                                                               |
| FLT3:NM_004119:exon20:c.2508_2510del:p.836_837del                         |
| IDH1:NM_005896:exon4:c.C394T:p.R132C                                      |
| DNMT3A:NM_022552:intron19:c.2323-1G>C                                     |
| NPM1:NM_002520:exon11:c.859_860insTCTG:p.L287fs                           |
| FLT3:NM_004119:exon14:c.1770_196dup:p.591_599dup                          |
| RAD21:NM_006265:exon2:c.98_99insTCCCTTTT:p.F33fs                          |
| EZH2:NM_004456:exon6:c.C619T:p.R207X                                      |
| EZH2:NM_004456:exon20:c.2229_2230insCCCGGC:p.I744delinsPGI                |
| WT1:NM_024426:exon9:c.1371_1372insGGTTCCGTCGT:p.R458fs                    |
| FLT3:NM_004119:exon14:c.1783_1821dup:p.595_607dup                         |
| WT1:NM_024426:exon9:c.C1372T:p.R458X                                      |
| WT1:NM_024426:intron7:c.1249+1G>A                                         |
| NRAS:NM_002524:exon2:c.G38A:p.G13D                                        |
| NPM1:NM_002520:exon11:c.859_860insTCTG:p.L287fs                           |
| TET2:NM_001127208:exon3:c.C1648T:p.R550X                                  |
| NRAS:NM_002524:exon2:c.G37C:p.G13R                                        |
| NRAS:NM_002524:exon3:c.A182G:p.Q61R                                       |
| SF3B1:NM_012433:exon15:c.C2098G:p.Q700E                                   |
| EP300:NM_001429:exon26:c.T4242G:p.Y1414X                                  |
| BCORL1:NM_021946:exon3:c.C2512T:p.Q838X                                   |
| STAG2:NM_001042749:exon25:c.C2464T:p.Q822X                                |
| DNMT3A:NM_022552:exon23:c.C2644A:p.R882S                                  |
| FLT3:NM_004119:exon14:c.1799_1800insCC:p.D600fs                           |
| NRAS:NM_002524:exon3:c.A183T:p.Q61H                                       |
| PTPN11:NM_002834:exon3:c.A227G:p.E76G                                     |
| FLT3:NM_004119:exon20:c.G2503T:p.D835Y                                    |
| IDH1:NM_005896:exon4:c.G395A:p.R132H                                      |
| NPM1:NM_002520:exon11:c.861_862insTGTA:p.L287fs                           |
| NPM1:NM_002520:exon11:c.861_862insTGCA:p.L287fs                           |
| 3:NM_004119:exon14:c.1793_1794insCGTTGATTTTCAGAGAATATGA:p.E598delinsDVDFR |
| SF3B1:NM_012433:exon14:c.G1998T:p.K666N                                   |
| GGAATGTGCCAAATGTTTCTGCAGCATTTCTTTCCATTGGAAAATCTTTAAAATGCACG               |
| NPM1:NM_002520:exon11:c.860_863dup:p.W288fs                               |
| IDH2:NM_002168:exon4:c.G419A:p.R140Q                                      |
| NRAS:NM_002524:exon2:c.G34A:p.G12S                                        |
| WT1:NM_024426:exon7:c.C1105T:p.R369X                                      |
| NPM1:NM_002520:exon11:c.859_860insTCTG:p.L287fs                           |
| DNMT3A:NM_175629:exon23:c.G2645A:p.R882H                                  |

|                                                                         |
|-------------------------------------------------------------------------|
| RUNX1:NM_001001890:exon6:c.1270_1271insGAACCAGAGCG:p.D424fs             |
| PTPN11:NM_002834:exon13:c.C1520A:p.T507K                                |
| STAG2:NM_001042749:exon31:c.3391_3392del:p.R1131fs                      |
| NPM1:NM_002520:exon11:c.859_860insTTTG:p.L287fs                         |
| FLT3:NM_004119:exon14:c.A1718G:p.E573G                                  |
| KRAS:NM_033360:exon2:c.G38A:p.G13D                                      |
| NRAS:NM_002524:exon2:c.G38A:p.G13D                                      |
| PTPN11:NM_002834:exon13:c.T1504C:p.S502P                                |
| SMC3:NM_005445:exon11:c.G931T:p.D311Y                                   |
| PTPN11:NM_002834:exon3:c.A227G:p.E76G                                   |
| SF3B1:NM_012433:exon15:c.A2098G:p.K700E                                 |
| TACTTCTACGTTGATTTTCAGAGAATATGAATATGATCTCAAATGGGAGTTTCCAAGAGAA           |
| DNMT3A:NM_175629:exon18:c.C2141G:p.S714C                                |
| SRSF2:NM_003016:exon1:c.C284T:p.P95L                                    |
| BCORL1:NM_021946:exon6:c.3985_4010delinsAGACCAGGAAAA:p.K1328fs          |
| FLT3:NM_004119:exon20:c.G2503T:p.D835Y                                  |
| KRAS:NM_033360:exon2:c.G38A:p.G13D                                      |
| PTPN11:NM_002834:exon3:c.G178C:p.G60R                                   |
| NF1:NM_001042492:exon14:c.1561delA:p.S521fs                             |
| IDH1:NM_005896:exon4:c.G395A:p.R132H                                    |
| DNMT3A:NM_175629:exon23:c.G2645A:p.R882H                                |
| NPM1:NM_002520:exon11:c.859_860insTCTG:p.L287fs                         |
| RAD21:NM_006265:exon5:c.419delT:p.V140fs                                |
| DNMT3A:NM_175630:exon2:c.C55T:p.R19W                                    |
| NPM1:NM_002520:exon9:c.758_771del                                       |
| TET2:NM_001127208:exon3:c.2780dupT:p.V927fs                             |
| TET2:NM_001127208:exon3:c.1837dupG:p.P612fs                             |
| DNMT3A:NM_175629:exon18:c.C2099T:p.P700L                                |
| 004119:exon14:c.1817_1818insTGAATATGATCTCAAATGGGAGTTTCC:p.P606delinsPEY |
| NPM1:NM_002520:exon11:c.860_863dup:p.W288fs                             |
| TET2:NM_001127208:exon3:c.971dupA:p.Q324fs                              |
| IDH1:NM_005896:exon4:c.C394T:p.R132C                                    |
| DNMT3A:NM_175629:exon23:c.G2678C:p.W893S                                |
| NPM1:NM_002520:exon11:c.860_863dup:p.W288fs                             |
| NO_MUTATION                                                             |
| U2AF1:NM_001025203:exon6:c.G467A:p.R156H                                |
| BRAF:NM_004333:exon3:c.G475A:p.V159I                                    |
| NPM1:NM_002520:exon11:c.859_860insTCTG:p.L287fs                         |
| STAG2:NM_001042749:exon6:c.346_356delinsC:p.D116fs                      |
| PHF6:NM_032458:exon9:c.902dupA:p.Y301_H302delinsX                       |
| TET2:NM_001127208:exon6:c.G3782A:p.R1261H                               |
| GATA2:NM_032638:exon4:c.936_956dup:p.312_318dup□                        |
| CEBPA:NM_004364:exon1:c.C970G:p.L324V                                   |
| CEBPA:NM_004364:exon1:c.939_940insAAG:p.V314delinsKV                    |
| FLT3:NM_004119:exon20:c.G2503T:p.D835Y                                  |
| IDH1:NM_005896:exon4:c.G395A:p.R132H                                    |
| NPM1:NM_002520:exon11:c.859_860insTCTG:p.L287fs                         |
| DNMT3A:NM_175629:exon23:c.C2644T:p.R882C                                |
| KRAS:NM_033360:exon2:c.G35A:p.G12D                                      |
| NRAS:NM_002524:exon3:c.A182G:p.Q61R                                     |

|                                                                            |
|----------------------------------------------------------------------------|
| CEBPA:NM_004364:exon1:c.68_78del:p.P23fs                                   |
| TET2:NM_001127208:exon7:c.A3907G:p.S1303G                                  |
| CEBPA:NM_004364:exon1:c.A914C:p.Q305P                                      |
| CSF3R:NM_156039:exon15:c.C1919A:p.T640N                                    |
| _004119:exon14:c.1805_1806insTTTCAGAGAATATGAATATGATCTCAA:p.K602delinsNFR   |
| CSF3R:NM_156039:exon17:c.2427dupC:p.S810fs                                 |
| SRSF2:NM_003016:exon1:c.C283A:p.P95T                                       |
| IDH2:NM_002168:exon4:c.G419A:p.R140Q                                       |
| NPM1:NM_002520:exon11:c.859_860insTCTG:p.L287fs                            |
| NRAS:NM_002524:exon2:c.G34A:p.G12S                                         |
| NRAS:NM_002524:exon3:c.A182G:p.Q61R                                        |
| WT1:NM_024426:exon9:c.C1393T:p.H465Y                                       |
| FLT3:NM_004119:exon20:c.2508_2510del:p.836_837del                          |
| FLT3:NM_004119:exon16:c.A1988G:p.K663R                                     |
| NPM1:NM_002520:exon11:c.860_863dup:p.W288fs                                |
| DNMT3A:NM_175629:exon7:c.C745T:p.Q249X                                     |
| DNMT3A:NM_175629:exon22:c.A2525G:p.Q842R                                   |
| IDH2:NM_002168:exon4:c.G419A:p.R140Q                                       |
| SRSF2:NM_003016:exon1:c.C284A:p.P95H                                       |
| ASXL1:NM_015338:exon12:c.1927dupG:p.G642fs                                 |
| FLT3:NM_004119:exon14:c.1797_1798insCTTACCCAATATGAATAT:p.D600delinsLTQYEYI |
| NPM1:NM_002520:exon11:c.859_860insTCTG:p.L287fs                            |
| IDH2:NM_002168:exon4:c.G419A:p.R140Q                                       |
| PTPN11:NM_002834:exon3:c.A227G:p.E76G                                      |
| IDH1:NM_005896:exon4:c.G395A:p.R132H                                       |
| DNMT3A:NM_175629:exon23:c.G2645A:p.R882H                                   |
| NPM1:NM_002520:exon11:c.859_860insTCTG:p.L287fs                            |
| IDH1:NM_005896:exon4:c.C394T:p.R132C                                       |
| NPM1:NM_002520:exon11:c.860_863dup:p.W288fs                                |
| WT1:NM_024426:exon7:c.1134delT:p.L378fs                                    |
| PTPN11:NM_001330437:exon13:c.G1520A:p.G507E                                |
| NPM1:NM_002520:exon11:c.859_860insTCTG:p.L287fs                            |
| STAG2:NM_001042749:intron17:c.1639-2A>G                                    |
| PHF6:NM_032458:exon9:c.903delC:p.Y301fs                                    |
| 3:NM_004119:exon14:c.1773_1774insTCAGATAATGAGTACTTCTAC:p.V592delinsSDNEY   |
| WT1:NM_024426:exon8:c.A1330T:p.R444X                                       |
| NPM1:NM_002520:exon11:c.860_863dup:p.W288fs                                |
| FLT3:NM_004119:exon16:c.C2028A:p.N676K                                     |
| M_004119:exon14:c.1793_1794insCTACGTTGATTTTCAGAGAATATGA:p.E598delinsDYVD   |
| RAD21:NM_006265:exon12:c.1585_1586insGA:p.K529fs                           |
| EP300:NM_001429:exon31:c.A5372G:p.Y1791C                                   |
| NPM1:NM_002520:exon11:c.859_860insTCTG:p.L287fs                            |
| DNMT3A:NM_175629:exon23:c.C2644T:p.R882C                                   |
| 821_1822insAGGCTCAGAGAATATGAATATGATCTCAAATGGGAGTTTCCAAGA:p.E608c           |
| n14:c.1783_1784insAGGGCTCCTCAGATAATGAGTACTTCTACGTTGATTTCA:p.R595delir      |
| DNMT3A:NM_175629:exon23:c.C2644T:p.R882C                                   |
| BCOR:NM_017745:exon14:c.4834dupC:p.L1612fs                                 |
| TP53:NM_001126112:exon8:c.C916T:p.R306X                                    |
| NRAS:NM_002524:exon2:c.G35A:p.G12D                                         |
| FLT3:NM_004119:exon20:c.A2522T:p.N841I                                     |

|                                                                          |
|--------------------------------------------------------------------------|
| FLT3:NM_004119:exon21:c.T2600G:p.I867S                                   |
| NPM1:NM_002520:exon11:c.859_860insTCTG:p.L287fs                          |
| SRSF2:NM_003016:exon1:c.C284G:p.P95R                                     |
| IDH2:NM_002168:exon4:c.G419A:p.R140Q                                     |
| RUNX1:NM_001001890:exon6:c.1075_1076insTACCTGCCGCCGCCCTACC:p.P359fs      |
| EZH2:NM_004456:exon17:c.G1978A:p.G660R                                   |
| SF3B1:NM_012433:exon15:c.A2098G:p.K700E                                  |
| DNMT3A:NM_022552:exon23:c.C2644T:p.R882C                                 |
| CBL:NM_005188:exon8:c.1134_1135delinsAA:p.378_379delinsLK                |
| CBL:NM_005188:exon9:c.G1243A:p.G415S                                     |
| KRAS:NM_033360:exon2:c.C53A:p.A18D                                       |
| NPM1:NM_002520:exon11:c.862_863insGCAG:p.W288fs                          |
| ASXL1:NM_015338:exon12:c.1927dupG:p.G642fs                               |
| TET2:NM_001127208:intron4:c.3500+1G>A                                    |
| SRSF2:NM_003016:exon1:c.C284G:p.P95R                                     |
| TET2:NM_001127208:exon10:c.4452delC:p.N1484fs                            |
| CBL:NM_005188:exon8:c.T1139C:p.L380P                                     |
| EZH2:NM_004456:exon18:c.G2069A:p.R690H                                   |
| PTPN11:NM_002834:exon3:c.G179T:p.G60V                                    |
| NRAS:NM_002524:exon2:c.G35C:p.G12A                                       |
| NPM1:NM_002520:exon11:c.859_860insTCTG:p.L287fs                          |
| DNMT3A:NM_022552:exon10:c.1160_1161insTG:p.C387fs                        |
| LT3:NM_004119:exon14:c.1807_1808insATGAATATGATCTCAAAT:p.W603delinsYEYDLK |
| SMC3:NM_005445:exon11:c.896_897insTAA:p.I299delinsIN                     |
| DNMT3A:NM_022552:exon23:c.G2645A:p.R882H                                 |
| NPM1:NM_002520:exon11:c.859_860insTCTG:p.L287fs                          |
| NPM1:NM_002520:exon11:c.859_860insTCTG:p.L287fs                          |
| IDH2:NM_002168:exon4:c.G419A:p.R140Q                                     |
| LT3:NM_004119:exon14:c.1807_1808insATGAATATGATCTCAAAT:p.W603delinsYEYDLK |
| NPM1:NM_002520:exon11:c.859_860insTCTG:p.L287fs                          |
| SMC3:NM_005445:exon11:c.896_897insTAA:p.I299delinsIN                     |
| DNMT3A:NM_022552:exon23:c.G2645A:p.R882H                                 |
|                                                                          |
| CEBPA:NM_004364:exon1:c.717_718insCGCGCCC:p.A240fs                       |
| CEBPA:NM_004364:exon1:c.939_940insAAG:p.V314delinsKV                     |
|                                                                          |
| WT1:NM_024426:exon7:c.1170_1171insCTGCCCC:p.F391fs                       |
| WT1:NM_024426:exon7:c.1109_1110insC:p.R370fs                             |
| WT1:NM_024426:exon7:c.1195_1196insCACTGCA:p.N399fs                       |
| NRAS:NM_002524:exon3:c.A182G:p.Q61R                                      |
| RAD21:NM_006265:exon8:c.867_872del:p.289_291del                          |
| CUX1:NM_001913:exon11:c.A1049G:p.K350R                                   |
| NRAS:NM_002524:exon2:c.G34A:p.G12S                                       |
| DNMT3A:NM_022552:exon23:c.G2645A:p.R882H                                 |
| KIT:NM_000222:exon9:c.A1526T:p.K509I                                     |
| GATA2:NM_032638:exon5:c.G1085A:p.R362Q                                   |
| NPM1:NM_002520:exon11:c.859_860insTCTG:p.L287fs                          |
| DNMT3A:NM_175629:exon23:c.G2645A:p.R882H                                 |
| AGATAATGAGTACTTCTACGTTGATTTTCAGAGAATATGAATATGATCTCAAATGGGAGTT            |
| NPM1:NM_002520:exon11:c.859_860insTCTG:p.L287fs                          |

|                                                                                 |
|---------------------------------------------------------------------------------|
| 95_1796insGCTCCTCAGATAATGAGTACTTCTACGTTGATTTTCAGAGAATATGAAT:p.Y599              |
| STACTTCTACGTTGATTTTCAGAGAATATGAATATGATCTCAAATGGGAGTTTCCAAGAGA/                  |
| NM_024426:exon7:c.1143_1144insTACGGTCG:p.A382fs                                 |
| FLT3:NM_004119:exon20:c.G2503T:p.D835Y                                          |
| NPM1:NM_002520:exon11:c.860_863dup:p.W288fs                                     |
| TET2:NM_001127208:exon6:c.G3785A:p.R1262Q                                       |
| T2:NM_001127208:exon3:c.2069delA:p.Q690fs,TET2:NM_017628:exon3:c.2069delA:p.Q69 |
| DNMT3A:NM_153759:exon19:c.G2078A:p.R693H, DNMT3A:NM_022552:exon23:c.G2645A:p.F  |
| 91_1792insACCGGCTCCTCAGATAATGAGTACTTCTACGTTGATTTTCAGAGAATAT:p.E598              |
| _199185:exon10:c.772_773insTCTG:p.L258fs,NPM1:NM_002520:exon11:c.859_860insTCT  |

| <b>VAF</b> |
|------------|
| 4.01146    |
| 37.963     |
| 44.7989    |
| 44.9198    |
| 48.2759    |
| 4.24628    |
| 4.4586     |
| 4.73118    |
| 29.7333    |
| 38.7952    |
| 43.6594    |
| 42.3656    |
| 46.0459    |
| 48.6423    |
| 94.1019    |
| 41.8573    |
| 44.6367    |
| 44.6398    |
| 45.9821    |
| 46.6368    |
| 48.5584    |
| 24.1379    |
| 40.1042    |
| 42.3469    |
| 4.42177    |
| 15.6485    |
| 41.7513    |
| 38.2253    |
| 38.5475    |
| 40.2597    |
| 33.494     |
| 43.7282    |
| 7.17629    |
| 29.5608    |
| 32.6172    |
| 37.4257    |
| 6.77656    |
| 33.4016    |
| 44.27      |
| 45.0751    |
| 38.4314    |
| 42.7653    |
| 46.2185    |
| 48.0287    |
| 43.9       |
| 5          |
| 4.2        |

|         |
|---------|
| 35.5491 |
| 43.6782 |
| 44.1319 |
| 45.5263 |
| 47.4227 |
| 20.5882 |
| 45.0704 |
| 45.5432 |
| 47      |
| 47.4783 |
| 49.6997 |
| NA      |
| 2.52874 |
| 45.0397 |
| 46.4471 |
| 46.6981 |
| NA      |
| 2.40964 |
| 3.90764 |
| 5.04386 |
| 13.3562 |
| 25      |
| 2.11726 |
| 22.043  |
| 23.9157 |
| 29.6296 |
| 63.6268 |
| 4.8474  |
| 37.7049 |
| 40.048  |
| 44.8161 |
| 84.6473 |
| 85.0622 |
| 48.6081 |
| NA      |
| 43.1579 |
| 8.42857 |
| 30.2264 |
| 41.9134 |
| 46.114  |
| 33.7079 |
| 38      |
| 46.2209 |
| 22.4771 |
| 43.9394 |
| 46.5228 |
| 16.3265 |
| 41.5254 |
| 41.2698 |
| 48.324  |



|         |
|---------|
| 34.7826 |
| 39.3417 |
| 41.9802 |
| 44.2029 |
| 48.6111 |
| 2.40964 |
| 2.88221 |
| 4.19162 |
| 5.9322  |
| 20.5607 |
| 43.2247 |
| 13.1868 |
| 46.8571 |
| 50      |
| 10      |
| 2.38636 |
| 9.40767 |
| 13.2836 |
| 23.0769 |
| 26.7068 |
| 43.4307 |
| 43.4944 |
| 44.9102 |
| 60      |
| 24      |
| 42.3423 |
| 43.6992 |
| 51.1364 |
| 9.45559 |
| 47.0199 |
| 92.8889 |
| 46.5753 |
| 48.9362 |
| 59.0361 |
| NA      |
| 22.5191 |
| 36.7347 |
| 57.265  |
| 82      |
| 83.9695 |
| 14.0777 |
| 39      |
| 40.5    |
| 44.7205 |
| 10.3352 |
| 17.1233 |
| 41.5789 |
| 53.6388 |
| 7.10526 |
| 24.1379 |

|         |
|---------|
| 40.3315 |
| 45.5587 |
| 46.2277 |
| 46.2633 |
| 3.61111 |
| 6.69856 |
| 46.6357 |
| 47.5709 |
| 48      |
| 2.01342 |
| 34.0659 |
| 9.25926 |
| 14.0496 |
| 25.8242 |
| 31.746  |
| 47.2527 |
| 3.15457 |
| 45.488  |
| 47.0588 |
| 49.1124 |
| 3.59589 |
| 44.6064 |
| 49.3506 |
| 33.8832 |
| 35.1082 |
| 39.071  |
| 43.9359 |
| 32.8947 |
| 33.8028 |
| 9.25926 |
| 10.5556 |
| 34.3066 |
| 75      |
| 13.3333 |
| 26.1905 |
| 36.5079 |
| 46.4789 |
| 57.9439 |
| 3.76884 |
| 43.7086 |
| 46.4164 |
| 47.1042 |
| 47.8088 |
| 30.0885 |
| 37.2093 |
| 43.75   |
| 88.7755 |
| 82.7119 |
| 3.58974 |
| 5.83153 |

|         |
|---------|
| 18.4783 |
| 42.9658 |
| 47.5362 |
| 48.0851 |
| 16.4912 |
| 44.7423 |
| 51.3465 |
| 52.809  |
| 81      |
| 4.35897 |
| 6.86499 |
| 16.6667 |
| 39.6396 |
| 43.2494 |
| 45.5621 |
| 47.2477 |
| 80.5611 |
| 16.1426 |
| 16.3814 |
| 20.6823 |
| 43.9863 |
| 44.0129 |
| 14.8377 |
| 39.7541 |
| 46.2085 |
| 47.4048 |
| 43.0556 |
| 46.1219 |
| 39.2226 |
| 40.9836 |
| 41.8231 |
| 46.6667 |
|         |
| 33.333  |
| 13.0802 |
|         |
| 4.55635 |
| 16.338  |
| 36.4943 |
| 43.75   |
| 37.4408 |
| 52.6957 |
| 44.247  |
| 46.2704 |
| 2.28401 |
| 48.3333 |
| 46.9091 |
| 41.261  |
| 7.78626 |
| 43.4442 |

|         |
|---------|
| 2.03095 |
| 8.0315  |
| 37.8534 |
| 8.79332 |
| 49.6552 |
| 46.1667 |
| 48.1918 |
| 42.8904 |
| 19.8895 |
| 41.9048 |

| Drug             | Provider        | Catalog # | Acronym | Solvent          |
|------------------|-----------------|-----------|---------|------------------|
| Azacitidine      | Selleckchem     | S1782     | AZA     | DMSO             |
| Crenolanib       | Selleckchem     | S2730     | CRENO   | DMSO             |
| Enasidenib       | Selleckchem     | S8205     | AG221   | DMSO             |
| Venetoclax       | MedChem Express | HY-15531  | VEN     | DMSO             |
| MI-2             | Selleckchem     | S7618     | MI-2    | DMSO             |
| Midostaurin      | MedChem Express | HY-10230  | MIDO    | DMSO             |
| Actinomycin D    | MedChem Express | HY-17559  | ActinoD | DMSO             |
| Cytarabine       | MedChem Express | HY-13605  | AraC    | DMSO             |
| Daunorubicin     | MedChem Express | HY-13062  | DNR     | DMSO             |
| EPZ5676          | Selleckchem     | S7062     | EPZ     | DMSO             |
| ATRA             | SIGMA           | R2625     | ATRA    | DMSO             |
| Panobinostat     | Selleckchem     | S1030     | PANO    | DMSO             |
| OTX015           | MedChem Express | HY-15743  | OTX015  | DMSO             |
| Arsenic Trioxyde | Sigma           | 72718     | ATO     | HCl 2%           |
| Selinexor        | Interchim       | AG001ASN  | SEL     | DMSO             |
| Idasanutlin      | MedChem Express | HY-15676  | IDASA   | DMSO             |
| Dactolisib       | MedChemExpress  | HY-50673  | DACTO   | DMSO             |
| Uprosertib       | MedChemExpress  | HY-15965  | UPRO    | DMSO             |
| Olaparib         | MedChem Express | HY-10162  | OLA     | DMSO             |
| Palbociclib      | MedChemExpress  | HY-50767  | PALBO   | H <sub>2</sub> O |
| Ulixertinib      | MedChemExpress  | HY-15816  | ULIX    | DMSO             |
| Ruxolitinib      | MedChemExpress  | HY-50856  | RUXO    | DMSO             |
| Dabrafenib       | MedChemExpress  | HY-14660  | DABRA   | DMSO             |
| Gilteritinib     | MedChem Express | HY-12432  | GILTE   | DMSO             |
| S63845           | MedChem Express | HY-100741 | S63845  | DMSO             |
| Glasdegib        | MedChem Express | HY-16391  | GLASDE  | DMSO             |
| Ivosidenib       | MedChem Express | HY-18767  | IVO     | DMSO             |

NR: not reached

\*arbitrary choice as PK data was not available and IC50 not reached in healthy CD34+ cells.

| Stock Concentration (mM) | Pharmacokinetics Data |                         | Healthy CD34                  |                       |
|--------------------------|-----------------------|-------------------------|-------------------------------|-----------------------|
|                          | C <sub>max</sub> (μM) | Reference (PMID or DOI) | Top tested concentration (μM) | IC <sub>50</sub> (μM) |
| 100                      | 3.1                   | 15831784                | 3                             | NR                    |
| 100                      | 0.48                  | 10.1182/blood.V126      | 0.5                           | NR                    |
| 100                      | 27.5                  | 29320949                | 30                            | NR                    |
| 100                      | 2.1                   | 28100580                | 3                             | 0.31                  |
| 100                      | N/A                   | N/A                     | 10                            | NR                    |
| 100                      | 3.8                   | 15345597                | 4                             | NR                    |
| 100                      | 0.16                  | 24968986                | 0.2                           | 0.041                 |
| 100                      | 55.13                 | 23919448                | 10                            | 2.73                  |
| 100                      | 0.19                  | 27738808                | 4                             | 0.19                  |
| 100                      | N/A                   | N/A                     | 10                            | NR                    |
| 100                      | 8                     | 10388008                | 8                             | NR                    |
| 100                      | 0.29                  | 25939707                | 0.3                           | 0.015                 |
| 20                       | 0.274                 | 26341814                | 1                             | 0.2                   |
| 5                        | 4.56                  | 28462082                | 5                             | 0.66                  |
| 100                      | 2                     | 28336527                | 2                             | NR                    |
| 10                       | 0.24                  | 23808545                | 3                             | NR                    |
| 20                       | 1.7                   | 28357727                | 1                             | NR                    |
| 80                       | 0.7                   | 23795919                | 1                             | NR                    |
| 100                      | 0.06                  | 30324586                | 1                             | NR                    |
| 25                       | 0.1                   | 27402157                | 1                             | NR                    |
| 100                      | 2.79                  | 29470718                | 10                            | NR                    |
| 100                      | 1.29                  | 29162613                | 10                            | NR                    |
| 50                       | 7.56                  | 27058232                | 10                            | NR                    |
| 10                       | 0.51                  | FDA                     | 5                             | NR                    |
| 10                       | N/A                   | N/A                     | 10                            | 0.029                 |
| 10                       | 3.03                  | 29463550                | 30                            | 1.038                 |
| 100                      | 1.69                  | 30758648                | 20                            | NR                    |

| + assay                            |                                    | Drug Response Pattern (Figure 2) Concentration ( $\mu\text{M}$ ) | Niche Component Screen (Figure 3) Concentration ( $\mu\text{M}$ ) | DNR-AraC S                      |
|------------------------------------|------------------------------------|------------------------------------------------------------------|-------------------------------------------------------------------|---------------------------------|
| IC <sub>40</sub> ( $\mu\text{M}$ ) | IC <sub>10</sub> ( $\mu\text{M}$ ) |                                                                  |                                                                   | Concentration ( $\mu\text{M}$ ) |
| NR                                 | NR                                 | 3                                                                | 50                                                                | -                               |
| NR                                 | NR                                 | 0.5                                                              | -                                                                 | 0.1                             |
| NR                                 | NR                                 | 30                                                               | -                                                                 | 6                               |
| 0.2                                | 0.034                              | 0.2                                                              | 0.5                                                               | 0.04                            |
| NR                                 | NR                                 | 10                                                               | -                                                                 | 2                               |
| NR                                 | NR                                 | 4                                                                | 20                                                                | 0.8                             |
| 0.027                              | 0.004                              | 0.03                                                             | -                                                                 | 0.004                           |
| 1.8                                | 0.3                                | 2                                                                | 20                                                                | 40                              |
| 0.12                               | 0.021                              | 0.1                                                              | 2                                                                 | 2                               |
| NR                                 | NR                                 | 10                                                               | -                                                                 | 2                               |
| NR                                 | NR                                 | 8                                                                | 10                                                                | 1.6                             |
| 0.01                               | 0.002                              | 0.01                                                             | 0.02                                                              | 0.002                           |
| 0.13                               | 0.02                               | 0.15                                                             | -                                                                 | 0.02                            |
| 0.44                               | 0.073                              | 0.4                                                              | 25                                                                | -                               |
| NR                                 | NR                                 | -                                                                | 2                                                                 | 0.4                             |
| NR                                 | NR                                 | -                                                                | -                                                                 | 0.048                           |
| NR                                 | NR                                 | -                                                                | -                                                                 | 0.34                            |
| NR                                 | NR                                 | -                                                                | -                                                                 | 0.14                            |
| NR                                 | NR                                 | -                                                                | -                                                                 | 0.012                           |
| NR                                 | NR                                 | -                                                                | -                                                                 | 0.02                            |
| NR                                 | NR                                 | -                                                                | -                                                                 | 0.56                            |
| NR                                 | NR                                 | -                                                                | -                                                                 | 0.26                            |
| NR                                 | NR                                 | -                                                                | -                                                                 | 1.5                             |
| NR                                 | NR                                 | -                                                                | -                                                                 | 0.1                             |
| 0.019                              | 0.0034                             | -                                                                | -                                                                 | 0.0034                          |
| 0.019                              | 0.01                               | -                                                                | -                                                                 | 0.01                            |
| NR                                 | NR                                 | -                                                                | -                                                                 | 0.34                            |

**Screen (Figure 5)**

| <b>Justification</b> |
|----------------------|
| -                    |
| 20% of Cmax          |
| 20% of Cmax          |
| IC10                 |
| arbitrary*           |
| 20% of Cmax          |
| IC10                 |
| arbitrary            |
| 20:1 AraC/DNR ratio  |
| arbitrary*           |
| 20% of Cmax          |
| IC10                 |
| IC10                 |
| -                    |
| 20% of Cmax          |
| 20% of Cmax          |
| 20% of Cmax          |
| 20% of Cmax          |
| 20% of Cmax          |
| 20% of Cmax          |
| 20% of Cmax          |
| 20% of Cmax          |
| 20% of Cmax          |
| 20% of Cmax          |
| 20% of Cmax          |
| IC10                 |
| IC10                 |
| 20% of Cmax          |



**Supplementary Table 5. Amino acid and hexose concentrations ( $\mu\text{M}$ ) in patients bone m**

| <b>UPN</b> | <b>Sample</b>         | <b>Ala</b> | <b>Arg</b> | <b>Asn</b> | <b>Asp</b> |
|------------|-----------------------|------------|------------|------------|------------|
| SLS009     | PLASMA                | 370        | 98.7       | 60         | 29.9       |
| SLS014     | PLASMA                | 459        | 85         | 70.4       | 4.63       |
| SLS019     | PLASMA                | 180        | 20         | 27.4       | 5.1        |
| SLS020     | PLASMA                | 425        | 77.2       | 56.7       | 22.1       |
| SLS025     | PLASMA                | 384        | 32.7       | 32.8       | 46.1       |
| SLS032     | PLASMA                | 292        | 62.2       | 33.1       | 13.3       |
| SLS033     | PLASMA                | 291        | 60.1       | 46.2       | 11         |
| SLS036     | PLASMA                | 76.6       | 13.5       | 11.8       | 10.2       |
| SLS037     | PLASMA                | 229        | 39.7       | 32.5       | 3.15       |
| SLS043     | PLASMA                | 428        | 62.1       | 53.8       | 117        |
| SLS048     | PLASMA                | 139        | 37.6       | 28.6       | 7.61       |
| SLS050     | PLASMA                | 434        | 139        | 55.2       | 75.2       |
| SLS068     | PLASMA                | 298        | 14.4       | 26.7       | 51.5       |
| SLS070     | PLASMA                | 172        | 78.8       | 37.6       | 5.33       |
| SLS083     | PLASMA                | 428        | 25.4       | 30.2       | 12.9       |
| SLS085     | PLASMA                | 287        | 95.8       | 41.1       | 25.2       |
| SLS094     | PLASMA                | 244        | 27.7       | 44.1       | 51.6       |
| SLS095     | PLASMA                | 551        | 46.9       | 69.6       | 47.8       |
| SLS107     | PLASMA                | 157        | 82.8       | 29.8       | 3.03       |
| SLS110     | PLASMA                | 274        | 34.3       | 31.9       | 6.7        |
| SLS134     | PLASMA                | 213        | 5.55       | 29         | 4.41       |
| SLS149     | PLASMA                | 218        | 24.6       | 22.9       | 16.5       |
| SLS150     | PLASMA                | 594        | 78.4       | 53.5       | 29.3       |
| SLS158     | PLASMA                | 563        | 18.3       | 48.1       | 47.9       |
| SLS041     | MSC w/AML CM          | 365        | 390        | 192        | 177        |
| SLS043     | MSC w/AML CM          | 375        | 363        | 209        | 213        |
| SLS050     | MSC w/AML CM          | 461        | 411        | 217        | 203        |
| SLS058     | MSC w/AML CM          | 456        | 457        | 210        | 213        |
| SLS085     | MSC w/AML CM          | 371        | 473        | 205        | 181        |
| N/A        | MSC w/o AML CM (ref.) | 381        | 350        | 211        | 217        |

narrow plasma samples, MSC with or without AML co-culture

| Cit  | Gln  | Glu  | Gly | His  | Ile  | Leu  |
|------|------|------|-----|------|------|------|
| 38.4 | 601  | 213  | 433 | 80.9 | 87   | 184  |
| 27.4 | 743  | 19.7 | 440 | 103  | 90   | 181  |
| 9.23 | 352  | 22.1 | 277 | 38.5 | 30.5 | 74.2 |
| 20.9 | 736  | 208  | 292 | 99   | 94.1 | 182  |
| 20.2 | 457  | 347  | 349 | 73.4 | 60.4 | 140  |
| 34.4 | 500  | 160  | 263 | 58.1 | 51.9 | 115  |
| 13.9 | 452  | 124  | 253 | 73.3 | 108  | 229  |
| 16.8 | 247  | 88.8 | 212 | 38.7 | 26.1 | 66.7 |
| 11.5 | 388  | 13.2 | 125 | 50.1 | 74.5 | 155  |
| 21   | 569  | 468  | 439 | 93.3 | 70.4 | 198  |
| 11.1 | 394  | 62.2 | 331 | 54.2 | 51.5 | 104  |
| 21.9 | 756  | 361  | 506 | 86.5 | 103  | 242  |
| 25.4 | 440  | 410  | 358 | 58.4 | 27.9 | 66.8 |
| 16.3 | 569  | 49   | 290 | 71.3 | 71.2 | 153  |
| 10.8 | 429  | 103  | 318 | 65.3 | 58.5 | 103  |
| 27.7 | 523  | 89.9 | 364 | 51   | 89.4 | 167  |
| 19.6 | 297  | 284  | 324 | 59   | 90   | 212  |
| 23.2 | 601  | 172  | 480 | 91.7 | 50.3 | 140  |
| 16.4 | 470  | 57   | 202 | 61   | 74.3 | 189  |
| 14.6 | 470  | 44.1 | 181 | 47.9 | 64.9 | 115  |
| 22.2 | 435  | 72.5 | 166 | 53.3 | 30   | 64.7 |
| 15   | 376  | 141  | 455 | 62   | 26.7 | 80.7 |
| 26.6 | 694  | 125  | 399 | 76.4 | 68.8 | 154  |
| 29   | 267  | 509  | 465 | 87.9 | 128  | 229  |
| 21.8 | 1580 | 609  | 618 | 138  | 285  | 347  |
| 23.3 | 1400 | 624  | 610 | 140  | 320  | 388  |
| 26.4 | 1410 | 609  | 705 | 158  | 347  | 443  |
| 26.3 | 1470 | 583  | 737 | 162  | 341  | 418  |
| 22.7 | 1570 | 657  | 689 | 153  | 348  | 418  |
| 23.4 | 1340 | 568  | 603 | 141  | 319  | 397  |

| <b>Lys</b> | <b>Met</b> | <b>Orn</b> | <b>Phe</b> | <b>Pro</b> | <b>Ser</b> | <b>Thr</b> |
|------------|------------|------------|------------|------------|------------|------------|
| 275        | 22.8       | 144        | 73.6       | 245        | 133        | 137        |
| 295        | 32.1       | 126        | 74.3       | 310        | 127        | 168        |
| 117        | 12.4       | 84.8       | 67.7       | 152        | 60.2       | 44.2       |
| 236        | 30         | 95         | 77.2       | 278        | 133        | 139        |
| 218        | 20.9       | 135        | 78         | 245        | 112        | 121        |
| 169        | 12.4       | 98.8       | 53.7       | 176        | 59.6       | 109        |
| 215        | 36.7       | 129        | 142        | 109        | 59.5       | 85.2       |
| 69.4       | 6.52       | 70.7       | 51.6       | 93.3       | 22.8       | 51.9       |
| 132        | 20.3       | 147        | 152        | 161        | 65.6       | 59.7       |
| 340        | 29.2       | 197        | 134        | 265        | 128        | 106        |
| 149        | 10.5       | 48.1       | 32.4       | 110        | 78.4       | 57.2       |
| 332        | 29.6       | 176        | 114        | 241        | 167        | 139        |
| 140        | 8.39       | 88.3       | 72.3       | 131        | 13.7       | 74.3       |
| 187        | 18.9       | 80.2       | 60.4       | 150        | 88.1       | 87.5       |
| 163        | 13         | 88         | 57.4       | 185        | 33.6       | 84.1       |
| 322        | 30.1       | 113        | 62.9       | 184        | 77         | 113        |
| 219        | 22.9       | 109        | 73.1       | 161        | 120        | 95.9       |
| 193        | 27.7       | 128        | 86.3       | 510        | 177        | 150        |
| 151        | 15.2       | 84.5       | 91.2       | 138        | 119        | 78.5       |
| 112        | 10.2       | 102        | 98.3       | 164        | 63.5       | 53.9       |
| 109        | 9.68       | 99.7       | 68         | 119        | 29         | 46.9       |
| 113        | 7.73       | 69.3       | 45         | 130        | 26.4       | 53.7       |
| 224        | 17.5       | 123        | 97.7       | 334        | 79         | 107        |
| 291        | 32.8       | 109        | 92.9       | 351        | 106        | 124        |
| 331        | 60.2       | 50.3       | 149        | 281        | 203        | 294        |
| 348        | 63.5       | 57.6       | 153        | 279        | 217        | 319        |
| 378        | 73.8       | 85.9       | 182        | 341        | 255        | 329        |
| 353        | 74.1       | 84.9       | 182        | 351        | 240        | 318        |
| 347        | 68.6       | 54.6       | 166        | 313        | 229        | 311        |
| 367        | 66.1       | 54.6       | 152        | 296        | 228        | 325        |

| <b>Trp</b> | <b>Tyr</b> | <b>Val</b> | <b>Hexoses</b> |
|------------|------------|------------|----------------|
| 67.5       | 84.1       | 264        | 5887           |
| 69.1       | 83.6       | 261        | 5423           |
| 46.1       | 64         | 130        | 6599           |
| 73.5       | 78.2       | 272        | 5818           |
| 56.6       | 78.5       | 233        | 4280           |
| 29.1       | 47.7       | 209        | 6062           |
| 61.6       | 89.6       | 282        | 3022           |
| 47.6       | 36.6       | 138        | 7332           |
| 43.3       | 70.3       | 269        | 8144           |
| 65         | 63.2       | 236        | 5254           |
| 48         | 30.3       | 176        | 5744           |
| 55.5       | 72.5       | 349        | 11364          |
| 32.6       | 46.6       | 135        | 3636           |
| 33.9       | 50.6       | 206        | 5495           |
| 48.3       | 50.1       | 221        | 3613           |
| 46.3       | 66.2       | 261        | 6365           |
| 27.5       | 62.3       | 255        | 3096           |
| 54.5       | 63.4       | 219        | 6257           |
| 44.7       | 51.2       | 275        | 6293           |
| 43.9       | 44.9       | 186        | 6786           |
| 52         | 49.1       | 133        | 5933           |
| 39.2       | 33         | 131        | 2571           |
| 52.1       | 66.5       | 265        | 7553           |
| 53.6       | 86.4       | 281        | 667            |
| 41         | 142        | 329        | 3562           |
| 38.7       | 148        | 343        | 5092           |
| 49.9       | 169        | 386        | 6417           |
| 53.4       | 168        | 400        | 6624           |
| 47.5       | 162        | 364        | 4592           |
| 45         | 148        | 346        | 5619           |

**Supplementary Table 6. Cytokine concentrations (pg/mL) in patients bone marrow plasma**

| <b>UPN</b> | <b>Sample</b>         | <b>SCF</b> | <b>TPO</b> | <b>M-CSF</b> | <b>IL-6</b> |
|------------|-----------------------|------------|------------|--------------|-------------|
| SLS009     | PLASMA                | 166.67     | 1783.69    | 15.69        | 14.41       |
| SLS014     | PLASMA                | 213.90     | 645.51     | 6.71         | 0.36        |
| SLS019     | PLASMA                | 133.60     | 2146.91    | 4.16         | 17.44       |
| SLS020     | PLASMA                | 130.75     | 334.86     | 10.97        | 0.08        |
| SLS032     | PLASMA                | 155.20     | 428.57     | 12.75        | 1.98        |
| SLS033     | PLASMA                | 107.84     | 4345.05    | 26.08        | 10.66       |
| SLS036     | PLASMA                | 112.01     | 1034.08    | 6.57         | 2.79        |
| SLS037     | PLASMA                | 130.75     | 2553.45    | 24.20        | 58.73       |
| SLS048     | PLASMA                | 126.63     | 524.13     | 2.74         | 0.45        |
| SLS050     | PLASMA                | 134.13     | 1007.57    | 15.05        | 0.27        |
| SLS070     | PLASMA                | 139.29     | 710.62     | 4.75         | 1.35        |
| SLS083     | PLASMA                | 145.50     | 959.54     | 4.92         | 1.39        |
| SLS085     | PLASMA                | 165.13     | 964.15     | 6.08         | 1.68        |
| SLS094     | PLASMA                | 153.62     | 266.74     | 18.92        | 31.77       |
| SLS095     | PLASMA                | 154.36     | 1091.52    | 10.45        | 2.08        |
| SLS107     | PLASMA                | 136.02     | 2330.95    | 15.59        | 4.36        |
| SLS110     | PLASMA                | 153.05     | 641.32     | 29.71        | 19.55       |
| SLS134     | PLASMA                | 132.19     | 326.31     | 7.51         | 5.64        |
| SLS149     | PLASMA                | 111.40     | 1145.63    | 5.33         | 4.67        |
| SLS150     | PLASMA                | 151.22     | 274.32     | 8.28         | 2.11        |
| SLS158     | PLASMA                | 92.08      | 178.12     | 16.85        | 641.73      |
| SLS041     | MSC w/AML CM          | 371.52     | 33.02      | 4.34         | 4954.19     |
| SLS043     | MSC w/AML CM          | 547.41     | 86.44      | 22.98        | 4877.97     |
| SLS050     | MSC w/AML CM          | 336.94     | 16.51      | 3.69         | 424.66      |
| SLS058     | MSC w/AML CM          | 321.79     | 16.51      | 1.52         | 335.24      |
| SLS085     | MSC w/AML CM          | 335.98     | 158.68     | 15.61        | 5120.21     |
| N/A        | MSC w/o AML CM (ref.) | 638.89     | 16.51      | 2.40         | 213.33      |

**sma samples, MSC with or without AML co-culture**

| <b>IL-3</b> | <b>GM-CSF</b> | <b>G-CSF</b> | <b>FLT3-L</b> | <b>EPO</b> |
|-------------|---------------|--------------|---------------|------------|
| 10.74       | 1.96          | 26.12        | 11.53         | 3102.79    |
| 9.02        | 0.06          | 14.57        | 56.83         | 448.83     |
| 0.53        | 0.56          | 46.26        | 2.54          | 5295.89    |
| 0.53        | 0.05          | 3.62         | 40.92         | 894.58     |
| 0.53        | 0.16          | 40.58        | 6.02          | 1666.10    |
| 0.53        | 0.11          | 81.97        | 1.73          | 285.71     |
| 8.11        | 0.25          | 6.41         | 2.20          | 3832.85    |
| 0.53        | 0.71          | 2751.97      | 344.55        | 4201.56    |
| 0.53        | 0.14          | 8.18         | 14.21         | 1603.22    |
| 4.62        | 0.01          | 19.26        | 4.71          | 473.80     |
| 29.96       | 0.47          | 14.41        | 1.70          | 9474.90    |
| 6.12        | 0.21          | 20.39        | 2.12          | 1480.91    |
| 10.18       | 0.11          | 14.62        | 118.73        | 101.77     |
| 0.53        | 0.11          | 17.92        | 49.96         | 336.82     |
| 18.44       | 0.30          | 6.73         | 95.98         | 144.15     |
| 0.53        | 0.06          | 22.92        | 3.75          | 2641.16    |
| 9.61        | 1.07          | 163.23       | 2.74          | 19817.46   |
| 0.53        | 0.01          | 17.97        | 7.84          | 280.62     |
| 0.53        | 0.08          | 1.30         | 3.31          | 633.83     |
| 5.01        | 0.15          | 18.12        | 5.20          | 2788.55    |
| 0.53        | 0.02          | 15.93        | 2.58          | 385.63     |
| 0.54        | 4.83          | 224.69       | 1279.48       | 31.84      |
| 0.54        | 102.80        | 584.14       | 1415.06       | 36.63      |
| 0.54        | 8.56          | 1.30         | 914.46        | 22.20      |
| 0.54        | 5.09          | 1.30         | 323.99        | 21.13      |
| 18.66       | 1195.44       | 9458.90      | 1556.85       | 37.73      |
| 0.54        | 9.69          | 1.30         | 1749.51       | 34.36      |

| Supplementary Table 7. Comparison of reference<br>and plasma-like medium        | MW    | MEM $\alpha$ (Cat #22571) |         |
|---------------------------------------------------------------------------------|-------|---------------------------|---------|
|                                                                                 |       | mg/L                      | mM      |
| <b>Anorganic salts</b>                                                          |       |                           |         |
| Calcium Chloride (CaCl <sub>2</sub> -2H <sub>2</sub> O)                         | 147   | 264                       | 1.796   |
| Magnesium Sulfate (MgSO <sub>4</sub> ) (anhyd.)                                 | 120   | 97.67                     | 0.814   |
| Potassium Chloride (KCl)                                                        | 75    | 400                       | 5.333   |
| Sodium Bicarbonate (NaHCO <sub>3</sub> )                                        | 84    | 2200                      | 26.190  |
| Sodium Chloride (NaCl)                                                          | 58    | 6800                      | 117.241 |
| Sodium Phosphate monobasic (NaH <sub>2</sub> PO <sub>4</sub> -H <sub>2</sub> O) | 138   | 140                       | 1.014   |
| <b>Other components</b>                                                         |       |                           |         |
| D(+)-Glucose anhydrous                                                          | 180   | 1000                      | 5.556   |
| Lipoic acid                                                                     | 206   | 0.2                       | 0.001   |
| Phenol Red                                                                      | 376.4 | 10                        | 0.027   |
| Sodium Pyruvate                                                                 | 110   | 110                       | 1.000   |
| <b>Vitamines</b>                                                                |       |                           |         |
| Ascorbic Acid                                                                   | 176   | 50                        | 0.284   |
| Biotin                                                                          | 244   | 0.1                       | 0.000   |
| Choline chloride                                                                | 140   | 1                         | 0.007   |
| D-Calcium pantothenate                                                          | 477   | 1                         | 0.002   |
| Folic Acid                                                                      | 441   | 1                         | 0.002   |
| myo-Inositol                                                                    | 180   | 2                         | 0.011   |
| Niacinamide                                                                     | 122   | 1                         | 0.008   |
| Pyridoxal hydrochloride                                                         | 204   | 1                         | 0.005   |
| Riboflavin                                                                      | 376   | 0.1                       | 0.000   |
| Thiamine hydrochloride                                                          | 337   | 1                         | 0.003   |
| Vitamin B12                                                                     | 1355  | 1.36                      | 0.001   |
| <b>Ribonucleosids</b>                                                           |       |                           |         |
| Adenosine                                                                       | 267   | 10                        | 0.037   |
| Cytidine                                                                        | 243   | 10                        | 0.041   |
| Guanosine                                                                       | 283   | 10                        | 0.035   |
| Uridine                                                                         | 244   | 10                        | 0.041   |
| <b>Deoxy-ribonucleosids</b>                                                     |       |                           |         |
| 2'-Deoxyadenosine x H <sub>2</sub> O                                            | 251   | 10                        | 0.040   |
| 2'-Deoxycytidine x HCl                                                          | 264   | 11                        | 0.042   |
| 2'-Deoxyguanosine                                                               | 267   | 10                        | 0.037   |
| 2'-Deoxythymidine                                                               | 242   | 10                        | 0.041   |
| <b>Amino acids</b>                                                              |       |                           |         |
| Glycine                                                                         | 75    | 50                        | 0.667   |
| L-Alanine                                                                       | 89    | 25                        | 0.281   |
| L-Arginine hydrochloride                                                        | NA    | 0                         | 0.000   |
| L-Arginine                                                                      | 211   | 105                       | 0.498   |
| L-Asparagine-H <sub>2</sub> O                                                   | 150   | 25                        | 0.167   |
| L-Aspartic acid                                                                 | 133   | 30                        | 0.226   |
| L-Cysteine hydrochloride-H <sub>2</sub> O                                       | 176   | 100                       | 0.568   |
| L-Cystine                                                                       | 313   | 31                        | 0.099   |
| L-Glutamic Acid                                                                 | 147   | 75                        | 0.510   |
| L-Glutamine                                                                     | 146   | 292                       | 2.000   |
| L-Histidine hydrochloride-H <sub>2</sub> O                                      |       |                           |         |
| L-Histidine                                                                     | 155   | 31                        | 0.200   |

|                        |     |       |       |
|------------------------|-----|-------|-------|
| L-Isoleucine           | 131 | 52.4  | 0.400 |
| L-Leucine              | 131 | 52    | 0.397 |
| L-Lysine hydrochloride |     |       |       |
| L-Lysine               | 183 | 73    | 0.399 |
| L-Methionine           | 149 | 15    | 0.101 |
| L-Phenylalanine        | 165 | 32    | 0.194 |
| L-Proline              | 115 | 40    | 0.348 |
| L-Serine               | 105 | 25    | 0.238 |
| L-Threonine            | 119 | 48    | 0.403 |
| L-Tryptophan           | 204 | 10    | 0.049 |
| L-Tyrosine             | 181 | 36    | 0.199 |
| L-Valine               | 117 | 46    | 0.393 |
| <b>Dialyzed FBS</b>    |     | 25%   |       |
| <b>Cytokines</b>       |     | ng/ml |       |
| TPO                    |     | 0     |       |
| EPO                    |     | 0     |       |



**Plasma-like Medium**

| mg/L   | mM      |
|--------|---------|
| 264.92 | 1.802   |
| 97.67  | 0.814   |
| 400    | 5.333   |
| 2200   | 26.188  |
| 6300   | 107.188 |
| 140    | 1.015   |
| 1000   | 5.556   |
| 0.2    | 0.001   |
| 10     | 0.027   |
| 110    | 1.000   |
| 50     | 0.284   |
| 0.1    | 0.000   |
| 1      | 0.007   |
| 1      | 0.002   |
| 1      | 0.002   |
| 2      | 0.011   |
| 1      | 0.008   |
| 1      | 0.005   |
| 0.1    | 0.000   |
| 1      | 0.003   |
| 1.33   | 0.001   |
| 10     | 0.038   |
| 10     | 0.041   |
| 10     | 0.035   |
| 10     | 0.041   |
| 10     | 0.040   |
| 11     | 0.042   |
| 10     | 0.038   |
| 10     | 0.041   |
| 32     | 0.430   |
| 22     | 0.250   |
| 0      | 0.000   |
| 35     | 0.160   |
| 8      | 0.050   |
| 8      | 0.060   |
| 100    | 0.570   |
| 31     | 0.100   |
| 33     | 0.220   |
| 144    | 0.990   |
| 0      | 0.000   |
| 18     | 0.120   |

|    |       |
|----|-------|
| 19 | 0.140 |
| 25 | 0.190 |
| 0  | 0.000 |
| 45 | 0.240 |
| 6  | 0.040 |
| 20 | 0.120 |
| 30 | 0.260 |
| 12 | 0.120 |
| 20 | 0.170 |
| 11 | 0.050 |
| 19 | 0.100 |
| 33 | 0.280 |

25%

ng/ml

1

2.5

**Supplementary Table 8. Variants and primers for targeted sequencing of primary samples a**

| UPN    | Target                | VariantCaller | Chr   | Pos       | REF       |
|--------|-----------------------|---------------|-------|-----------|-----------|
| SLS356 | BCOR_p.L1612fs        | Varscan       | chrX  | 40053925  | A         |
| SLS356 | DNMT3A_p.R882C        | Varscan       | chr2  | 25234374  | G         |
| SLS356 | FLT3_p.E608ITD        | Pindel        | chr13 | 28034097  | C         |
| SLS352 | ASXL1_p.V751fs        | Varscan       | chr20 | 32434965  | T         |
| SLS352 | CEBPA_p.P197delinsHPP | Varscan       | chr19 | 33301825  | G         |
| SLS352 | IDH2_p.R140Q          | Varscan       | chr15 | 90088702  | C         |
| SLS352 | SRSF2_p.P95H          | Varscan       | chr17 | 76736877  | G         |
| SLS353 | NPM1_p.A253fs         | Pindel        | chr5  | 171405390 | ATAGAAAAA |
| SLS353 | TET2_p.P612fs         | Varscan       | chr4  | 105235778 | T         |
| SLS353 | TET2_p.V927fs         | Varscan       | chr4  | 105236721 | G         |
| SLS158 | ASXL1_p.G642fs        | Varscan       | chr20 | 32434638  | A         |
| SLS158 | DNMT3A_p.Q842R        | Varscan       | chr2  | 25235779  | T         |
| SLS158 | IDH2_p.R140Q          | Varscan       | chr15 | 90088702  | C         |
| SLS158 | SRSF2_p.95H           | Varscan       | chr17 | 76736877  | G         |
| SLS325 | DNMT3A_p.V296G        | Varscan       | chr2  | 25247718  | A         |
| SLS325 | NRAS_p.G12D           | Varscan       | chr1  | 114716126 | C         |
| SLS325 | SRSF2_p.P95H          | Varscan       | chr17 | 76736877  | G         |
| SLS325 | TET2_p.H1219R         | Varscan       | chr4  | 105243631 | A         |
| SLS351 | PTPN11_p.T507K        | Varscan       | chr12 | 112489096 | C         |
| SLS351 | RUNX1_p.D424fs        | Varscan       | chr21 | 34792226  | T         |
| SLS355 | CBL_p.378_379delinsLK | Varscan       | chr11 | 119278204 | CC        |
| SLS355 | DNMT3A_pR882C         | Varscan       | chr2  | 25234374  | G         |
| SLS355 | EZH2_p.G660R          | Varscan       | chr7  | 148810384 | C         |
| SLS355 | RUNX1_p.P359fs        | Varscan       | chr21 | 34792421  | G         |
| SLS355 | SF3B1_p.K700E         | Varscan       | chr2  | 197402110 | T         |

ind residual cells after standard or niche-like culture

| ALT      | Forward Primer          | Reverse Primer         |
|----------|-------------------------|------------------------|
| AG       | AGGACCAGAAGACCAGGATGA   | GCATTGTGTGAGGTTTCGTGG  |
| A        | CCTGCTGTGTGGTTAGACGG    | CGCAAATACTCCTTCAGCGG   |
| GAGATCAT | AAAGCCAGCTACAGATGGTACA  | TCCATAAGCTGTTGCGTTCA   |
| TG       | ACAGAGGGCTACAGTTGGACT   | GTGGTGCCAGACTCACATTCA  |
| GGCGGGT  | CGCTGGTGATCAAGCAGGA     | TTGTCCACCGACTTCTTGGC   |
| T        | GCTGCAGTGGGACCACTATT    | CAAGAGGATGGCTAGGCGAG   |
| T        | TTCGCCTTCGTTTCGCTTTCA   | CCCCTCAGCCCCGTTTACC    |
| CGT      | TCAGGGACAAGAATCCTTCAAGA | CAGTGCACTACGTTCCCTTGC  |
| TG       | CTCGTTTTACCAAGCGGAAT    | TTGGGACTGCCCTTGATTCAT  |
| GT       | GCAAGATCTTCTTCACAGGTGC  | GTGTGACTTCTCCCTGGTC    |
| AG       | CGAGAGGTCACCACTGCCATA   | AGGATAAGGCGGCAGTAGTTG  |
| C        | TGGTAGACGCATGACCAGTGT   | GCACAGCAATCAGAACAGCC   |
| T        | GCTGCAGTGGGACCACTATT    | CAAGAGGATGGCTAGGCGAG   |
| T        | TTCGCCTTCGTTTCGCTTTCA   | CCCCTCAGCCCCGTTTACC    |
| C        | TCGTCTCCCCGATTTTGCT     | TGAGAATTTGCCGTCTCCGAA  |
| T        | AAGTACTGTAGATGTGGCTCGC  | TCCGACAAGTGAGAGACAGGAT |
| T        | TTCGCCTTCGTTTCGCTTTCA   | CCCCTCAGCCCCGTTTACC    |
| G        | ATGGAATGGTGATCCACGCAG   | AAGTGACGCTGAACTCTCTT   |
| A        | TTCGTAGGTGTTGACTGCGA    | CCTGCTCAAAGGAGAGCGT    |
| GCTCTGGT | GGCTCCTACCAGTTCTCCATG   | CTCAGTAGGGCCTCCACAC    |
| AA       | TGGAGCTTAAAATAGGACCCAGA | GCTGTTTAGATCCGTACCTGC  |
| A        | CCTGCTGTGTGGTTAGACGG    | CGCAAATACTCCTTCAGCGG   |
| T        | TCACTCTGTGCGCTTTTGTG    | TCTGGTCACCTCACTGACCT   |
| GGCGGCGC | CCCCCGCATGCACTATCC      | CCCACCATGGAGAACTGGTA   |
| C        | GCTGACAGGCTATGGTTCATGT  | GTTGGCGGATACCCTTCCATA  |

| PRIMARY_VAF | STANDARD_CULTURE_VAF | ICHE-LIKE_CULTURE_VAF |
|-------------|----------------------|-----------------------|
| 0.93        | 0.89                 | 0.38                  |
| 0.49        | 0.44                 | 0.22                  |
| 0.19        | 0.09                 | 0.07                  |
| 0.43        | 0.39                 | 0.23                  |
| 0.36        | 0.03                 | 0.30                  |
| 0.45        | 0.39                 | 0.21                  |
| 0.42        | 0.39                 | 0.22                  |
| 0.02        | 0.03                 | 0.03                  |
| 0.40        | 0.33                 | 0.28                  |
| 0.38        | 0.27                 | 0.27                  |
| 0.30        | 0.20                 | 0.21                  |
| 0.07        | 0.06                 | 0.06                  |
| 0.49        | 0.29                 | 0.34                  |
| 0.47        | 0.32                 | 0.32                  |
| 0.26        | 0.39                 | 0.34                  |
| 0.45        | 0.40                 | 0.30                  |
| 0.49        | 0.41                 | 0.33                  |
| 0.44        | 0.41                 | 0.31                  |
| 0.35        | 0.34                 | 0.34                  |
| 0.28        | 0.27                 | 0.26                  |
| 0.83        | 0.88                 | 0.72                  |
| 0.48        | 0.46                 | 0.38                  |
| 0.34        | 0.38                 | 0.34                  |
| 0.12        | 0.11                 | 0.08                  |
| 0.48        | 0.45                 | 0.37                  |

Supplementary Table 9. Gene signatures for leukemic states.

| VANGALEN_GMP_LIKE | VANGALEN_HSC_LIKE | VANGALEN_PROGENITOR_LIKE | VANGALEN_T |
|-------------------|-------------------|--------------------------|------------|
| PRTN3             | NPTX2             | CDK6                     | DEFB1      |
| MPO               | H1FO              | HSP90AB1                 | RNASE2     |
| CALR              | EMP1              | SPINK2                   | MS4A3      |
| CLEC5A            | MEIS1             | EEF1B2                   | SERPINB10  |
| ELANE             | CALCRL            | PCNP                     | SESN3      |
| POU4F1            | TPSD1             | TAPT1-AS1                | ZFR        |
| TRH               | TPT1              | HINT1                    | MRPL33     |
| TSPOAP1           | CRHBP             | LRRC75A-AS1              | CTSG       |
| CEBPE             | CLNK              | DSE                      | SLC44A1    |
| LINC01835         | TSC22D1           | PEBP1                    | SLPI       |
| NUCB2             | DST               | LOC107984974             | FUT4       |
| CSF3R             | NRIP1             | H2AFY                    | SRGN       |
| RUNX1T1           | ABCB1             | EEF1A1                   | CD70       |
| CD38              | GABRA4            | SMIM24                   | PRLR       |
| PLPPR3            | ZBTB20            | PSME1                    | PLD3       |
| IGFBP2            | ABCA9             | SOX4                     | LPL        |
| PRRT4             | TPSB2             | LINC01623                | RETN       |
| SNHG5             | KMT2A             | EEF1G                    | TP53INP2   |
| FABP5             | FAM30A            | EBPL                     | HSPA5      |
| LOC100419170      | MEF2C             | EIF4B                    | RNASE3     |
| CLEC11A           | TMEM74            | PARP1                    | CCL23      |
| SERPINB1          | PDZRN4            | MEST                     | EMB        |
| AZU1              | ST3GAL1           | TMEM70                   | ATP8B4     |
| FBN2              | XIRP2             | TFDP2                    | CLU        |
| HNRNPDL           | RBPMS             | ATP5G2                   | FAM107B    |
| HSPB1             | TMEM25            | NAP1L1                   | KBTBD11    |
| RNA5-8S           | C20orf203         | MSI2                     | CSTA       |
| THSD7A            | GNG11             | TPM4                     | ANKRD28    |
| C12orf57          | SLC6A13           | SPN                      | PIWIL4     |
| FGFR1             | HOPX              | SELL                     | RNVU1-6    |
| LPO               | CMTM2             | RACK1                    | F13A1      |
| MGST1             | HIST1H2BK         | CTSC                     | PROK2      |
| C1QTNF4           | NPDC1             | PRDX6                    | IL31RA     |
| HMGN1             | SCRN1             | EGFL7                    | PLAC8      |
| SIPA1L2           | MECOM             | SNHG6                    | ELF1       |
| DDOST             | CXCL2             | NOP53                    | EP400NL    |
| PTGIR             | CCS               | MRPL57                   | EAF2       |
| GATM              | FAM74A4           | SELENOP                  | RFX8       |

|                 |                      |                |                 |
|-----------------|----------------------|----------------|-----------------|
| <i>VAMP8</i>    | <i>UMODL1-AS1</i>    | <i>CCDC152</i> | <i>PTGFR</i>    |
| <i>FAM46A</i>   | <i>CCDC18-AS1</i>    | <i>SRSF6</i>   | <i>JUN</i>      |
| <i>VAMP5</i>    | <i>TTLL10</i>        | <i>SNHG8</i>   | <i>FRMD3</i>    |
| <i>STAR</i>     | <i>CFAP61</i>        | <i>B4GALT6</i> | <i>HOXB-AS3</i> |
| <i>ANKRD18A</i> | <i>PLCB4</i>         | <i>HNRNPA1</i> | <i>PHACTR3</i>  |
| <i>TM7SF3</i>   | <i>SPON1</i>         | <i>KIF2A</i>   | <i>AK2</i>      |
| <i>CCND1</i>    | <i>LINC01770</i>     | <i>HSH2D</i>   | <i>ECRP</i>     |
| <i>ROBO1</i>    | <i>CACNB4</i>        | <i>PTPRCAP</i> | <i>DDIT3</i>    |
| <i>GFI1</i>     | <i>CCDC144NL-AS1</i> | <i>NACA2</i>   | <i>RFLNB</i>    |
| <i>DEFA4</i>    | <i>RNF217</i>        | <i>PDLIM1</i>  | <i>FEZ1</i>     |
| <i>CERS6</i>    | <i>ZBPB</i>          | <i>CPA3</i>    | <i>SERPINB2</i> |
| <i>PTMA</i>     | <i>MPPED2</i>        | <i>GNPTAB</i>  | <i>CDKN2A</i>   |

PROMONOCYTE\_LIKE

VANGALEN\_MONOCYTE\_LIKE

VANGALEN\_CDC\_LIKE

|                  |                 |
|------------------|-----------------|
| <i>FCN1</i>      | <i>MRC1</i>     |
| <i>S100A12</i>   | <i>HLA-DRB5</i> |
| <i>MAFB</i>      | <i>CST3</i>     |
| <i>VCAN</i>      | <i>SAMHD1</i>   |
| <i>S100A9</i>    | <i>NAPSB</i>    |
| <i>PLBD1</i>     | <i>FCER1A</i>   |
| <i>SERPINA1</i>  | <i>HLA-DRB1</i> |
| <i>BCL2A1</i>    | <i>JAML</i>     |
| <i>THBS1</i>     | <i>PKIB</i>     |
| <i>PSAP</i>      | <i>HLA-DRA</i>  |
| <i>S100A8</i>    | <i>HLA-DRB6</i> |
| <i>FPR1</i>      | <i>CPVL</i>     |
| <i>C5AR1</i>     | <i>HLA-DPB1</i> |
| <i>CD14</i>      | <i>HLA-DQA1</i> |
| <i>NAMPT</i>     | <i>HLA-DPA1</i> |
| <i>VNN2</i>      | <i>CLEC4A</i>   |
| <i>CTSS</i>      | <i>TMSB10</i>   |
| <i>DUSP1</i>     | <i>CAP1</i>     |
| <i>CEBPB</i>     | <i>HLA-DQB1</i> |
| <i>CR1</i>       | <i>CRIP1</i>    |
| <i>NFKBIA</i>    | <i>CLEC10A</i>  |
| <i>SLC11A1</i>   | <i>GPX1</i>     |
| <i>LILRB3</i>    | <i>ITGB7</i>    |
| <i>BCL6</i>      | <i>HLA-DQB2</i> |
| <i>CYP1B1</i>    | <i>DBI</i>      |
| <i>TNFAIP2</i>   | <i>FTH1P3</i>   |
| <i>MS4A10</i>    | <i>ACTB</i>     |
| <i>AQP9</i>      | <i>HLA-DQA2</i> |
| <i>TLR4</i>      | <i>S100B</i>    |
| <i>APOBEC3A</i>  | <i>ALDH2</i>    |
| <i>LRRK2</i>     | <i>GABARAP</i>  |
| <i>CD163</i>     | <i>LY86</i>     |
| <i>LRP1</i>      | <i>IGSF6</i>    |
| <i>S100A10</i>   | <i>HLA-DPB2</i> |
| <i>CD68</i>      | <i>CD74</i>     |
| <i>MEGF9</i>     | <i>PAK1</i>     |
| <i>NCF2</i>      | <i>LGALS2</i>   |
| <i>LOC643802</i> | <i>CSF1R</i>    |



|                 |                  |
|-----------------|------------------|
| <i>IFNGR1</i>   | <i>PALLD</i>     |
| <i>FTL</i>      | <i>CCR2</i>      |
| <i>SLC24A4</i>  | <i>GPR183</i>    |
| <i>CD300E</i>   | <i>GRB2</i>      |
| <i>CXCL8</i>    | <i>EPS8</i>      |
| <i>CLEC7A</i>   | <i>COTL1</i>     |
| <i>NEAT1</i>    | <i>DHRS9</i>     |
| <i>CLEC4E</i>   | <i>HLA-DMB</i>   |
| <i>CRISPLD2</i> | <i>HLA-DMA</i>   |
| <i>MEFV</i>     | <i>PYCARD</i>    |
| <i>ACSL1</i>    | <i>LOC644936</i> |
| <i>NCF1</i>     | <i>SH3BGRL3</i>  |

**Supplementary Table 10. Differential gene expression averaged across 500 progenitor ce**

| <b>Gene</b> | <b>log2FC</b> | <b>FDR q-value</b> |
|-------------|---------------|--------------------|
| ANXA1       | -2.6974206    | 0                  |
| CD99        | -2.2820004    | 0                  |
| MYADM       | -2.733183     | 0                  |
| TAGLN2      | -1.9249345    | 0                  |
| TSC22D3     | -2.9993758    | 0                  |
| VIM         | -3.6780996    | 0                  |
| LMNA        | -3.6389994    | 4.10E-302          |
| CRIP1       | -4.0560232    | 1.92E-286          |
| TUBA1A      | -2.5670584    | 1.48E-269          |
| RPS10       | 1.09409307    | 4.08E-252          |
| RGCC        | -3.3617637    | 3.69E-251          |
| ADGRE5      | -1.9630999    | 1.72E-245          |
| EIF1        | -1.2130854    | 1.46E-239          |
| ATP2B1      | -2.0437947    | 1.43E-237          |
| UBC         | -1.4030298    | 9.65E-216          |
| RPS29       | 0.73806574    | 2.43E-215          |
| JUND        | -1.5843134    | 1.31E-213          |
| RPL38       | 0.86553586    | 1.06E-207          |
| AC020916.1  | -2.0424889    | 3.84E-205          |
| EMP3        | -1.8603933    | 6.30E-203          |
| TUBB4B      | -1.6948327    | 1.23E-201          |
| PLCG2       | 1.73889251    | 1.58E-201          |
| TPSAB1      | 3.14224632    | 9.83E-194          |
| MTRNR2L12   | 1.32960747    | 1.06E-189          |
| LTC4S       | 1.45301171    | 2.62E-186          |
| AHNAK       | -2.0062326    | 9.35E-180          |
| EMP1        | -1.9737394    | 1.77E-179          |
| RPS27       | 0.66449818    | 2.45E-179          |
| TGFB1       | -1.3589861    | 4.55E-178          |
| CLIC1       | -1.0599698    | 1.49E-177          |
| CD44        | -1.4139905    | 4.04E-177          |
| SAT1        | -1.810989     | 2.29E-174          |
| MGST1       | 1.63918342    | 5.11E-173          |
| CYTL1       | 2.30323256    | 7.35E-172          |
| LRRFIP1     | -1.3394138    | 3.80E-171          |
| RPL31       | 0.73453269    | 2.51E-170          |
| UCP2        | -1.5624121    | 1.03E-169          |
| MCL1        | -1.5763477    | 1.50E-165          |
| IRF1        | -1.4870665    | 1.00E-154          |
| SLC40A1     | 1.54519055    | 2.25E-152          |
| SNHG6       | 0.96096112    | 7.02E-148          |
| RTN4        | -1.1290849    | 2.98E-145          |
| MYL6        | -0.9907065    | 3.40E-144          |
| KLF6        | -1.6926249    | 5.53E-144          |
| CALM1       | -1.3234723    | 3.69E-142          |
| RPL37       | 0.58034541    | 2.06E-140          |
| RAB11FIP1   | -1.2910544    | 7.12E-140          |

|            |            |           |
|------------|------------|-----------|
| PPP1R15A   | -1.1996037 | 4.28E-129 |
| TUBB6      | -1.032931  | 3.49E-127 |
| MMP2       | 1.04829923 | 1.03E-126 |
| APOC2      | 1.29550691 | 2.08E-126 |
| ANPEP      | 1.01018428 | 2.76E-122 |
| GNA15      | -1.0148793 | 4.63E-122 |
| EFHD2      | -1.036381  | 5.46E-122 |
| RARA       | -0.9494113 | 4.89E-119 |
| PER1       | -0.8811781 | 7.47E-119 |
| HSPA5      | -1.9722822 | 1.37E-118 |
| PDLIM1     | -0.9238836 | 5.95E-118 |
| ORA1       | -0.9288289 | 1.88E-116 |
| MAP2K3     | -1.1052079 | 3.96E-116 |
| CD52       | -1.2972961 | 5.63E-116 |
| ANKRD28    | -1.0756378 | 9.73E-116 |
| MIDN       | -1.0952485 | 3.53E-114 |
| MYB        | 1.00199086 | 8.06E-114 |
| MYC        | 1.0027345  | 6.77E-113 |
| TNFRSF12A  | -0.9224185 | 1.37E-112 |
| ZFAS1      | 0.86367636 | 2.31E-112 |
| UQCR10     | 0.83424068 | 1.79E-109 |
| CREB5      | -0.9755295 | 4.24E-109 |
| RPL39      | 0.49607268 | 9.89E-109 |
| ZFP36      | -1.3358433 | 1.07E-108 |
| TPM4       | -1.177647  | 1.47E-108 |
| RPS9       | -0.5469057 | 2.21E-108 |
| SLC44A1    | 0.90458732 | 4.28E-108 |
| GLIPR2     | -0.8639548 | 1.15E-107 |
| AIF1       | -0.8685854 | 4.49E-107 |
| SOX4       | 1.37021265 | 6.13E-107 |
| CTSD       | 0.88867636 | 9.14E-107 |
| VSIR       | -1.1052289 | 1.23E-106 |
| AKAP13     | -1.0324252 | 3.71E-106 |
| MT-ND4L    | 0.8833201  | 1.18E-105 |
| JUNB       | -1.4384736 | 3.23E-104 |
| CRIP2      | -0.7457232 | 7.85E-103 |
| ZBTB7A     | -0.9192055 | 8.75E-103 |
| RPL34      | 0.49323596 | 7.91E-102 |
| RPS20      | 0.65462472 | 9.50E-101 |
| SEPTIN11   | -0.9636516 | 1.23E-100 |
| PLK3       | -0.8735534 | 2.24E-100 |
| S100A11    | -1.3080064 | 3.09E-100 |
| PWWP3A     | 0.57170648 | 2.47E-99  |
| RASL10A    | -0.6764697 | 2.78E-99  |
| AL355922.1 | 0.7595787  | 4.44E-99  |
| CIRBP      | -0.8388411 | 1.10E-98  |
| MTURN      | -0.8639262 | 1.92E-98  |
| H1FX       | -1.6938784 | 2.86E-98  |
| GABPB1-AS  | 1.05327393 | 4.17E-98  |
| IDS        | -0.9510931 | 5.98E-98  |

|            |            |          |
|------------|------------|----------|
| SORL1      | 1.03587789 | 2.43E-97 |
| SH3BGRL3   | -0.8522189 | 3.86E-97 |
| H3F3A      | -0.5900456 | 5.36E-97 |
| PABPC1     | 0.74131603 | 5.87E-97 |
| MT-ATP8    | 0.90572535 | 1.11E-96 |
| BCL2       | 0.62212086 | 7.21E-96 |
| FOSB       | -1.1492029 | 9.80E-96 |
| RPL35A     | 0.46701293 | 3.66E-95 |
| LST1       | -0.9579725 | 5.16E-95 |
| NAIP       | 0.56997162 | 6.45E-95 |
| LYN        | -0.8471912 | 4.38E-94 |
| PRR7       | -0.6654126 | 2.45E-93 |
| CDKN1A     | -0.7299736 | 5.06E-93 |
| KIT        | 0.79256751 | 8.91E-93 |
| HES1       | -1.1910289 | 1.69E-91 |
| DSTN       | -0.8761812 | 2.06E-91 |
| LINC01226  | 0.57150607 | 2.09E-91 |
| PRXL2C     | -0.8187203 | 2.47E-91 |
| RAP1B      | -0.8573844 | 3.60E-91 |
| TSC22D1    | -1.1306032 | 4.85E-91 |
| ICAM3      | -0.7675359 | 2.86E-90 |
| RASGRP3    | 0.81424717 | 5.62E-90 |
| HMG1       | 0.62865292 | 5.79E-88 |
| LARS       | 0.73186766 | 7.66E-88 |
| PHLDA2     | -0.7588794 | 1.27E-87 |
| CITED2     | 0.7934308  | 2.88E-87 |
| RNASE2     | 1.12106751 | 6.84E-87 |
| TXN        | -0.8186493 | 4.64E-86 |
| MIS18BP1   | 0.79515337 | 5.70E-86 |
| FYB1       | 0.79924071 | 7.54E-86 |
| KCTD9      | -0.9768716 | 5.60E-85 |
| HSD17B4    | 0.66595974 | 1.30E-84 |
| ST8SIA6    | 0.68871887 | 2.59E-84 |
| SLC9A3R1   | -0.8955429 | 3.19E-84 |
| SPIN4      | 0.61577528 | 7.29E-84 |
| PCBP2      | 0.6507924  | 1.27E-83 |
| RPS17      | 0.62535002 | 1.42E-83 |
| PNP        | -0.8954521 | 1.45E-83 |
| ITGA5      | -0.7613676 | 1.55E-83 |
| LINC01268  | 0.62351376 | 1.97E-83 |
| DNAJB6     | -0.8460499 | 2.62E-83 |
| ST3GAL6    | 0.43242129 | 2.86E-83 |
| KMT2E      | -0.7563822 | 3.49E-83 |
| ANGPT1     | 0.98621889 | 5.80E-83 |
| RBM38      | -0.8088177 | 6.79E-83 |
| MYCN       | 0.61163652 | 6.81E-83 |
| AC245060.5 | 0.81220073 | 8.41E-83 |
| CAPG       | 0.78009752 | 2.39E-82 |
| CXXC5      | -0.9560445 | 3.92E-82 |
| PPIL4      | -0.7341789 | 4.85E-82 |

|            |            |          |
|------------|------------|----------|
| IFITM10    | 0.35016314 | 5.28E-82 |
| TPM3       | -0.7436446 | 8.89E-82 |
| MPC2       | -0.6974314 | 1.40E-81 |
| MAT2A      | 0.72902563 | 1.69E-81 |
| HERC2      | 0.61914715 | 1.73E-81 |
| IFT57      | -0.7068963 | 2.74E-81 |
| GTF2I      | 0.74163734 | 4.26E-81 |
| MRC2       | 0.44876069 | 4.30E-81 |
| TMSB10     | -0.7078046 | 8.42E-81 |
| JCHAIN     | -1.7196723 | 1.49E-79 |
| RGS18      | 0.57428502 | 1.81E-79 |
| LRPAP1     | 0.77416893 | 4.56E-79 |
| RASGEF1B   | -0.6713388 | 5.58E-79 |
| HIF1A      | -0.8312706 | 5.67E-79 |
| ACSM3      | 1.02637586 | 6.80E-79 |
| URI1       | 0.69362026 | 9.82E-79 |
| FAM30A     | -0.9955689 | 6.08E-78 |
| SERBP1     | 0.64884815 | 1.55E-77 |
| TREM1      | -0.7788406 | 2.15E-77 |
| LMNB1      | 0.51367311 | 4.74E-77 |
| KLF3       | -0.8282717 | 7.83E-77 |
| VMP1       | -0.7918617 | 1.89E-76 |
| RELB       | -0.7677596 | 3.12E-76 |
| FSCN1      | -0.8029673 | 5.30E-76 |
| NFATC1     | -0.7100713 | 6.83E-76 |
| KNOP1      | 0.52762706 | 1.62E-75 |
| RPL37A     | 0.42703289 | 1.96E-75 |
| MT-ND6     | 0.78521975 | 3.89E-75 |
| PHF20      | -0.7523418 | 1.02E-74 |
| NDUFV2     | -0.6473749 | 1.32E-74 |
| HTRA3      | 0.45983633 | 1.92E-74 |
| AL627171.2 | 0.67263484 | 1.99E-74 |
| MBOAT7     | -0.7476926 | 2.16E-74 |
| NACA       | 0.43246715 | 4.73E-74 |
| FRY        | 0.48752687 | 8.07E-74 |
| YBX3       | -0.8703873 | 2.60E-73 |
| IRF2BP2    | 0.80679355 | 9.83E-73 |
| NEAT1      | -1.0198013 | 1.92E-72 |
| KRAS       | -0.7066414 | 2.10E-72 |
| ARID4B     | -0.7861258 | 2.24E-72 |
| NDUFB1     | 0.64379731 | 2.44E-72 |
| LY6E       | -0.8388744 | 1.17E-71 |
| MBP        | -0.7438181 | 1.24E-71 |
| DDAH2      | -0.7432204 | 1.31E-71 |
| S100A6     | -1.1242583 | 2.74E-71 |
| PIM3       | -0.7530294 | 8.69E-71 |
| RPS11      | 0.45045669 | 1.70E-70 |
| TOP2B      | 0.74092227 | 1.87E-70 |
| UBE2B      | -0.6639425 | 1.88E-70 |
| ID1        | -1.4815564 | 2.06E-70 |

|            |            |          |
|------------|------------|----------|
| MEX3B      | 0.37006259 | 2.12E-70 |
| HMGB1      | 0.64721509 | 7.19E-70 |
| CD74       | -0.8991125 | 9.00E-70 |
| HLA-A      | -0.6939658 | 9.34E-70 |
| MANF       | -0.7347408 | 9.71E-70 |
| RALGDS     | -0.7934938 | 1.05E-69 |
| YPEL5      | -0.8759533 | 1.90E-69 |
| MRPL33     | 0.67135685 | 3.15E-69 |
| YWHAZ      | -0.8238131 | 3.22E-69 |
| ARF6       | -0.6964692 | 7.73E-69 |
| PRKDC      | 0.6614071  | 9.53E-69 |
| NARS       | 0.60693795 | 9.83E-69 |
| CBX3       | 0.62336677 | 1.17E-68 |
| VAMP8      | 0.60132389 | 1.37E-68 |
| RNASE3     | 0.45055065 | 1.46E-68 |
| R3HDM4     | -0.6018552 | 1.57E-68 |
| AL034397.3 | 0.58162962 | 1.58E-68 |
| GAPT       | 0.66349024 | 1.96E-68 |
| HCST       | -0.9391117 | 2.78E-68 |
| RSL1D1     | 0.61595434 | 3.22E-68 |
| RPS28      | 0.3603081  | 3.37E-68 |
| CSNK1A1    | -0.6782394 | 4.31E-68 |
| SH2B3      | -0.5997514 | 4.85E-68 |
| FBXO34     | -0.7169805 | 6.23E-68 |
| CD38       | 0.57689345 | 1.07E-67 |
| CAT        | 0.67701936 | 2.16E-67 |
| TMEM161B-  | 0.72449433 | 2.35E-67 |
| RALGAPA2   | 0.51707777 | 3.00E-67 |
| BPTF       | 0.72538398 | 3.28E-67 |
| RAC1       | -0.5856071 | 5.32E-67 |
| NAP1L1     | 0.69496898 | 8.50E-67 |
| LINC02470  | 0.49777902 | 9.24E-67 |
| C11orf54   | 0.42373154 | 1.32E-66 |
| SERF2      | -0.4831417 | 1.62E-66 |
| ATP8B4     | 0.77213898 | 3.73E-66 |
| CTR9       | 0.74448095 | 4.17E-66 |
| TENT5A     | 0.55034298 | 8.85E-66 |
| EZR        | -0.8644081 | 2.20E-65 |
| TP53       | 0.38162827 | 2.22E-65 |
| SYNJ2      | -0.7996188 | 5.34E-65 |
| CD84       | 0.57809704 | 7.37E-65 |
| CBX1       | 0.37186455 | 8.43E-65 |
| RHOA       | -0.6580268 | 1.31E-64 |
| CYTH4      | -0.7010823 | 1.51E-64 |
| TIPARP     | -0.815914  | 1.66E-64 |
| UBB        | -0.6211001 | 1.71E-64 |
| OMA1       | 0.31449344 | 2.92E-64 |
| JUN        | -1.193584  | 4.58E-64 |
| LSP1       | -0.7621611 | 4.64E-64 |
| ALOX5AP    | -0.7016797 | 5.32E-64 |

|            |            |          |
|------------|------------|----------|
| CDH26      | 0.31467911 | 9.20E-64 |
| TACC1      | -0.7011355 | 1.34E-63 |
| LRPPRC     | 0.53568613 | 1.51E-63 |
| ATP2B1-AS1 | -0.6923183 | 1.93E-63 |
| MZB1       | -0.7643753 | 2.25E-63 |
| PLXDC2     | 0.57189016 | 2.78E-63 |
| SGMS2      | -0.5241783 | 3.20E-63 |
| MT-ND3     | 0.55997443 | 3.22E-63 |
| GNAI2      | -0.6346656 | 3.71E-63 |
| SPINK2     | -0.754124  | 4.91E-63 |
| TPPP       | -0.4170585 | 6.53E-63 |
| JMJD1C     | -0.7956556 | 6.82E-63 |
| RIPOR2     | -0.6633149 | 7.30E-63 |
| ZSCAN18    | -0.558345  | 1.04E-62 |
| ZNF66      | 0.3753942  | 1.09E-62 |
| UPP1       | -0.6251533 | 1.26E-62 |
| C16orf54   | -0.5636699 | 1.39E-62 |
| DYNLT1     | -0.591388  | 1.52E-62 |
| AC244502.1 | 0.98911547 | 1.69E-62 |
| CENPJ      | 0.47801633 | 2.14E-62 |
| S100A10    | -1.1494807 | 3.20E-62 |
| PLP2       | -0.6809263 | 5.29E-62 |
| MAP7D1     | -0.6241055 | 5.78E-62 |
| SAMHD1     | -0.5664814 | 6.33E-62 |
| NPDC1      | -0.6359328 | 7.79E-62 |
| PPP3CA     | 0.5219     | 8.21E-62 |
| GATD3A     | 0.40600984 | 8.86E-62 |
| CMTM3      | -0.6813344 | 1.11E-61 |
| EXOSC5     | 0.38911419 | 1.54E-61 |
| ACTN1      | 0.56560175 | 3.07E-61 |
| RCS1       | 0.50855888 | 3.53E-61 |
| NINJ1      | -0.6921484 | 3.89E-61 |
| ELMSAN1    | -0.7213132 | 5.39E-61 |
| CD96       | 0.69873204 | 8.66E-61 |
| YWHAQ      | -0.5296341 | 9.98E-61 |
| CYTH1      | -0.7096039 | 1.06E-60 |
| PNISR      | 0.59964212 | 1.12E-60 |
| GSN        | -0.6471872 | 1.57E-60 |
| RBM12B     | 0.42491705 | 2.31E-60 |
| NOL8       | 0.52921155 | 3.92E-60 |
| ODF3L1     | -0.3295742 | 4.26E-60 |
| RELL1      | -0.7014424 | 5.09E-60 |
| LGALS1     | -1.559372  | 5.31E-60 |
| CHCHD2     | -0.5033848 | 6.09E-60 |
| UBTF       | 0.4709071  | 6.26E-60 |
| CYTOR      | -0.7095258 | 7.99E-60 |
| HIPK1      | -0.6285611 | 8.86E-60 |
| RPL41      | 0.32568444 | 1.10E-59 |
| KLF13      | -0.6685914 | 1.18E-59 |
| TMOD3      | -0.5456386 | 1.46E-59 |

|           |            |          |
|-----------|------------|----------|
| STAT1     | 0.41928879 | 1.52E-59 |
| RHOG      | -0.6499176 | 3.47E-59 |
| THEMIS2   | -0.6086422 | 3.78E-59 |
| SPART     | 0.71432075 | 4.51E-59 |
| PTP4A3    | -0.5558287 | 4.95E-59 |
| MTSS1     | -0.4117939 | 7.44E-59 |
| RPL15     | -0.3880319 | 8.41E-59 |
| PIM1      | -0.7360319 | 1.24E-58 |
| CFL1      | -0.5908045 | 1.25E-58 |
| CDC42     | -0.5538094 | 1.31E-58 |
| H3F3B     | -0.8404185 | 1.45E-58 |
| BCL3      | -0.5968088 | 1.63E-58 |
| ZNRF1     | 0.44115441 | 1.76E-58 |
| HSP90B1   | -1.086205  | 2.08E-58 |
| SNX2      | -0.6194247 | 2.10E-58 |
| ARL4A     | -0.6485114 | 2.47E-58 |
| CYTIP     | -0.6309972 | 3.71E-58 |
| RPL23     | 0.50649505 | 4.70E-58 |
| G3BP2     | -0.63612   | 4.78E-58 |
| CSRNP1    | -0.5374179 | 4.90E-58 |
| IFFO2     | -0.4990381 | 5.05E-58 |
| ASAH1     | 0.77253679 | 6.03E-58 |
| TRIM73    | 0.46514366 | 6.36E-58 |
| SET       | 0.54756166 | 6.72E-58 |
| FTX       | 0.70136687 | 8.59E-58 |
| MFSD1     | 0.54961003 | 1.02E-57 |
| SRSF3     | 0.61357772 | 1.08E-57 |
| ETF1      | -0.6783039 | 1.64E-57 |
| PPP1R18   | -0.5680168 | 2.06E-57 |
| GAS2L1    | -0.3380015 | 2.07E-57 |
| MDK       | -0.7215902 | 2.30E-57 |
| TUBB      | -0.7745298 | 3.01E-57 |
| GNAI3     | -0.5423482 | 3.24E-57 |
| PLPPR3    | 0.62929609 | 3.66E-57 |
| ARPC5L    | -0.492111  | 3.68E-57 |
| ZBTB43    | -0.5822644 | 3.85E-57 |
| TSEN34    | -0.5627648 | 5.40E-57 |
| SMC2      | 0.44501494 | 6.40E-57 |
| TASOR     | 0.42759447 | 1.79E-56 |
| CAPZA2    | -0.5965556 | 1.92E-56 |
| RILPL2    | -0.6670998 | 2.40E-56 |
| RPLP2     | 0.31362797 | 2.91E-56 |
| RPL30     | 0.32799883 | 3.31E-56 |
| MTRNR2L8  | 0.51873569 | 3.44E-56 |
| ZBTB44    | 0.56359957 | 4.58E-56 |
| NPTX2     | -0.427179  | 4.84E-56 |
| TMBIM4    | 0.5720632  | 5.74E-56 |
| LINC-PINT | -0.6253175 | 5.97E-56 |
| NPC2      | 0.54679448 | 6.21E-56 |
| NCF4      | 0.61980701 | 8.55E-56 |



|          |            |          |
|----------|------------|----------|
| SRSF7    | 0.67928953 | 1.03E-55 |
| RPAP2    | 0.70503459 | 1.23E-55 |
| C16orf74 | 0.33429027 | 1.44E-55 |
| CFD      | 1.44848675 | 1.83E-55 |
| AHR      | -0.6304411 | 1.98E-55 |
| IL1RAP   | -0.6602295 | 3.01E-55 |
| PARP4    | 0.44837764 | 3.07E-55 |
| MTIF3    | 0.54576627 | 3.56E-55 |
| TSTD1    | -0.6180974 | 6.18E-55 |
| WTAP     | -0.6237599 | 6.91E-55 |
| RPS21    | 0.34874188 | 7.29E-55 |
| APAF1    | 0.34386366 | 8.34E-55 |
| BIN1     | -0.5183095 | 9.35E-55 |
| SIK3     | -0.5600025 | 9.40E-55 |
| HIST1H4C | 0.45046912 | 1.72E-54 |
| LUC7L3   | 0.56820822 | 1.81E-54 |
| WASHC1   | 0.44051304 | 1.99E-54 |
| TTC3     | 0.68332996 | 2.79E-54 |
| CDKN2D   | -0.6083945 | 2.91E-54 |
| WDFY2    | -0.6644279 | 3.74E-54 |
| ANTXR2   | -0.63814   | 5.61E-54 |
| PIGM     | 0.35370937 | 5.69E-54 |
| KPNA4    | -0.4954174 | 7.00E-54 |
| UBE2N    | -0.4696156 | 8.78E-54 |
| NAMPT    | -0.7531864 | 1.37E-53 |
| ADAM17   | -0.6651494 | 1.70E-53 |
| SOCS3    | -0.5223127 | 1.71E-53 |
| IL1B     | 0.37911173 | 2.78E-53 |
| TLE5     | -0.547993  | 3.02E-53 |
| EGFL7    | -0.7117309 | 3.96E-53 |
| KLF10    | -0.6854863 | 4.13E-53 |
| FCER1G   | -0.6932999 | 4.59E-53 |
| MAFF     | -0.6196221 | 5.02E-53 |
| DEPTOR   | 0.25036107 | 5.35E-53 |
| GOLGA8R  | 0.30916071 | 6.19E-53 |
| CCND3    | -0.6159351 | 7.73E-53 |
| SRSF5    | 0.50068455 | 7.96E-53 |
| ARHGDI A | -0.5144051 | 8.01E-53 |
| DBI      | -0.6885679 | 8.66E-53 |
| KDM6B    | -0.6870278 | 8.93E-53 |
| GOLGA8N  | 0.35684623 | 1.50E-52 |
| SAP18    | -0.6685033 | 1.57E-52 |
| DLD      | -0.4572061 | 2.00E-52 |
| COX6B1   | 0.52557609 | 2.33E-52 |
| FAM217B  | 0.33396983 | 2.50E-52 |
| H19      | -0.8199189 | 2.85E-52 |
| CARD19   | -0.5233279 | 4.93E-52 |
| ZNF737   | 0.3537126  | 5.00E-52 |
| PTPRC    | -0.6716935 | 5.17E-52 |
| RABAC1   | -0.5387286 | 6.21E-52 |

|            |            |          |
|------------|------------|----------|
| TTC17      | 0.43976063 | 6.66E-52 |
| TRAF4      | -0.5701537 | 6.67E-52 |
| WDR12      | 0.36695977 | 1.39E-51 |
| SLC35E4    | -0.5299522 | 1.79E-51 |
| PTPRE      | -0.7021456 | 2.22E-51 |
| AC096667.1 | 0.29770173 | 2.60E-51 |
| ETFB       | -0.527388  | 2.66E-51 |
| TFG        | -0.4429358 | 2.85E-51 |
| LAMP2      | 0.53438312 | 5.13E-51 |
| GAS5       | 0.53242848 | 5.21E-51 |
| RBBP4      | 0.51282673 | 6.39E-51 |
| Z97192.3   | 0.38236176 | 6.43E-51 |
| ATRX       | 0.66256601 | 7.17E-51 |
| ASCL2      | 0.2387863  | 7.30E-51 |
| RIOK3      | -0.5773867 | 8.29E-51 |
| STK17B     | -0.6039626 | 1.03E-50 |
| PPP4R3B    | 0.46142831 | 1.07E-50 |
| PDCD11     | 0.33297852 | 1.12E-50 |
| PRDX3      | 0.44743326 | 1.39E-50 |
| LUZP1      | -0.5649618 | 1.64E-50 |
| TNFRSF1A   | -0.4975975 | 1.92E-50 |
| CNR2       | 0.30066005 | 1.97E-50 |
| CNST       | -0.6364985 | 2.98E-50 |
| LMO4       | 0.53268735 | 5.87E-50 |
| EDEM3      | 0.45931444 | 6.03E-50 |
| TSPAN2     | -0.4070613 | 6.73E-50 |
| TIMP1      | -0.6795239 | 8.26E-50 |
| CITED4     | 0.30662019 | 1.11E-49 |
| OIP5-AS1   | 0.55201478 | 2.20E-49 |
| BCO2       | -0.4905713 | 2.33E-49 |
| ZNF680     | 0.27056724 | 2.40E-49 |
| TMEM63A    | -0.4840842 | 2.75E-49 |
| PSMD12     | -0.4424931 | 2.91E-49 |
| LDHA       | -0.6109836 | 3.41E-49 |
| SMC4       | 0.66597704 | 3.83E-49 |
| FUCA1      | 0.358464   | 4.02E-49 |
| MAP3K8     | -0.6038392 | 5.84E-49 |
| CKAP2      | 0.36649424 | 7.30E-49 |
| ARGLU1     | 0.60377438 | 9.29E-49 |
| AGO2       | -0.5488434 | 9.63E-49 |
| TTC1       | 0.41651919 | 9.69E-49 |
| UBE2D2     | -0.542855  | 1.00E-48 |
| ARL8A      | -0.4502618 | 1.29E-48 |
| GPR183     | -0.8403182 | 1.52E-48 |
| SPNS3      | -0.5352891 | 1.58E-48 |
| TSG101     | -0.4130362 | 2.13E-48 |
| GOLIM4     | 0.50064067 | 2.54E-48 |
| DUSP6      | -1.0025327 | 2.82E-48 |
| H2AFJ      | -0.5145425 | 3.29E-48 |
| HNRNPUL1   | -0.5233577 | 4.79E-48 |

|            |            |          |
|------------|------------|----------|
| LRRFIP2    | -0.5866882 | 4.89E-48 |
| CLEC2D     | 0.22140046 | 5.20E-48 |
| MRPL34     | 0.43819287 | 5.74E-48 |
| GAPDH      | -0.4235196 | 6.88E-48 |
| LRRK1      | 0.30239198 | 7.72E-48 |
| S100A4     | -1.0603466 | 7.98E-48 |
| GCSH       | 0.37322959 | 8.66E-48 |
| PAK2       | 0.46190937 | 8.89E-48 |
| ITM2C      | -0.6717356 | 1.10E-47 |
| HCG18      | 0.49188063 | 1.15E-47 |
| CHST12     | 0.40403766 | 1.38E-47 |
| ITGA4      | 0.65000853 | 1.60E-47 |
| TARBP1     | 0.47029131 | 1.63E-47 |
| SYAP1      | -0.7814528 | 2.13E-47 |
| MIB1       | 0.42092073 | 2.29E-47 |
| PTPN1      | -0.5537686 | 2.42E-47 |
| AL354733.3 | 0.24003295 | 2.66E-47 |
| SETDB2     | 0.42995777 | 2.71E-47 |
| CLEC2B     | -0.5994896 | 3.15E-47 |
| DENND11    | 0.37379695 | 3.54E-47 |
| ARL4C      | -0.4895534 | 4.17E-47 |
| CYB5A      | 0.27974532 | 4.50E-47 |
| AC104083.1 | 0.2336449  | 5.16E-47 |
| RARA-AS1   | -0.3833336 | 5.50E-47 |
| ETV6       | 0.4963417  | 5.95E-47 |
| RBM28      | 0.37269078 | 6.02E-47 |
| PSTPIP2    | 0.46449906 | 6.51E-47 |
| GMCL1      | 0.45857491 | 8.37E-47 |
| HSPE1      | 0.61375354 | 9.33E-47 |
| UBR5-AS1   | 0.44258269 | 9.86E-47 |
| EHMT2      | 0.31182651 | 1.01E-46 |
| ATM        | 0.45056494 | 1.06E-46 |
| YWHAH      | -0.5310725 | 1.20E-46 |
| SOS1       | 0.36619817 | 1.71E-46 |
| PRKD2      | -0.362484  | 1.99E-46 |
| VEGFB      | 0.33615326 | 2.13E-46 |
| IQGAP1     | -0.5555608 | 2.47E-46 |
| RNASEH2B   | 0.61057672 | 2.50E-46 |
| GALNT1     | 0.44026083 | 2.51E-46 |
| FCHSD2     | 0.34337515 | 2.81E-46 |
| IQCH-AS1   | 0.24880903 | 3.08E-46 |
| LINC00342  | 0.62301144 | 3.60E-46 |
| PLEC       | -0.5899258 | 4.28E-46 |
| PYGL       | 0.46206589 | 5.43E-46 |
| ARHGAP27   | -0.5310192 | 5.50E-46 |
| YTHDC1     | 0.49210656 | 5.62E-46 |
| TMA16      | 0.42855115 | 7.27E-46 |
| CSNK1D     | -0.4662808 | 9.16E-46 |
| HLTF       | 0.35097218 | 1.07E-45 |
| ZNF804A    | 0.25273918 | 1.27E-45 |

|            |            |          |
|------------|------------|----------|
| PPP1CB     | -0.5835629 | 1.32E-45 |
| SLC20A1    | -0.5792477 | 1.33E-45 |
| TWF2       | -0.5166929 | 1.50E-45 |
| CFP        | -0.4207009 | 1.59E-45 |
| SLC39A3    | 0.50341361 | 1.68E-45 |
| PER2       | -0.4463266 | 1.85E-45 |
| EVI2B      | 0.54100643 | 2.53E-45 |
| BAIAP2     | -0.4504845 | 2.93E-45 |
| ELF1       | -0.6370083 | 3.03E-45 |
| DENND4A    | -0.5484726 | 3.27E-45 |
| ARHGAP4    | -0.4362004 | 3.89E-45 |
| ST13       | 0.47253387 | 4.63E-45 |
| RAD50      | 0.42476636 | 4.70E-45 |
| NSA2       | 0.54919554 | 5.01E-45 |
| EXOSC6     | 0.39798891 | 5.66E-45 |
| LFNG       | -0.4825168 | 5.94E-45 |
| GARS-DT    | 0.36512357 | 6.21E-45 |
| KCNE3      | 0.34876854 | 6.72E-45 |
| YPEL3      | 0.48394051 | 7.10E-45 |
| SUB1       | -0.4933681 | 7.84E-45 |
| SGO2       | 0.29419454 | 7.85E-45 |
| GPATCH2    | -0.468366  | 8.24E-45 |
| RHOC       | -0.5157534 | 1.10E-44 |
| SEC61B     | -0.4970211 | 1.12E-44 |
| MRPS26     | 0.30750467 | 1.19E-44 |
| AGL        | 0.26365403 | 1.24E-44 |
| ACOT7      | -0.3457832 | 1.26E-44 |
| ZMYM4      | 0.3865584  | 1.26E-44 |
| SLBP       | -0.4115055 | 1.38E-44 |
| S1PR4      | -0.3699272 | 1.40E-44 |
| PCF11      | 0.53140737 | 1.60E-44 |
| ENSA       | -0.4515399 | 1.64E-44 |
| FDX1       | -0.423047  | 2.20E-44 |
| AC092683.1 | 0.40576851 | 2.23E-44 |
| TNRC18     | 0.48907638 | 2.25E-44 |
| TMX4       | -0.6913336 | 2.34E-44 |
| SPOP       | -0.3752171 | 2.35E-44 |
| IMPA2      | 0.25708345 | 3.07E-44 |
| NR3C1      | -0.4928003 | 3.50E-44 |
| ST6GALNAC  | -0.4003238 | 3.53E-44 |
| MAN1A1     | 0.41704904 | 3.62E-44 |
| CHD1       | -0.6001375 | 3.80E-44 |
| MITD1      | 0.38143262 | 3.98E-44 |
| BOD1L1     | 0.57391623 | 4.00E-44 |
| BAALC      | -0.5821022 | 4.20E-44 |
| ARID5A     | -0.5085851 | 4.33E-44 |
| RPL36A     | 0.3541521  | 4.95E-44 |
| ADI1       | 0.41385641 | 5.75E-44 |
| ARMCX3     | -0.5998741 | 5.93E-44 |
| STRAP      | -0.449987  | 6.54E-44 |

|            |            |          |
|------------|------------|----------|
| MCRIP2     | 0.28436743 | 8.05E-44 |
| SRSF6      | 0.58993264 | 8.64E-44 |
| CASP8      | -0.532206  | 9.40E-44 |
| NDE1       | -0.4160869 | 9.78E-44 |
| TOMM7      | 0.42823291 | 1.05E-43 |
| RAB1A      | -0.4013122 | 1.05E-43 |
| IGSF10     | 0.32240576 | 1.17E-43 |
| COMMD6     | 0.43005374 | 1.25E-43 |
| GPSM2      | 0.31160773 | 1.34E-43 |
| JUP        | -0.4751726 | 1.51E-43 |
| TMX1       | 0.37365041 | 1.61E-43 |
| TMCC1-AS1  | 0.31554746 | 1.69E-43 |
| BMP2K      | 0.45696776 | 1.74E-43 |
| SERTAD1    | -0.5083785 | 1.89E-43 |
| SFXN3      | -0.4395623 | 2.00E-43 |
| ZC3H8      | 0.30529221 | 2.12E-43 |
| RBM14      | -0.497172  | 2.22E-43 |
| MAP1LC3B   | -0.5329168 | 2.32E-43 |
| TMEM173    | -0.4706775 | 2.34E-43 |
| MOB3A      | -0.4640523 | 3.58E-43 |
| AL021368.2 | 0.41010532 | 3.98E-43 |
| ALG8       | 0.18011692 | 4.20E-43 |
| HES4       | -0.5224448 | 4.32E-43 |
| LEPROTL1   | -0.500181  | 4.51E-43 |
| ZNF141     | 0.34656477 | 5.15E-43 |
| CA5B       | -0.4325605 | 5.30E-43 |
| RPL13A     | 0.28380308 | 6.36E-43 |
| HIC1       | -0.4334861 | 6.49E-43 |
| TPPP3      | -0.3319023 | 6.61E-43 |
| TNFRSF4    | -0.7147495 | 7.29E-43 |
| HSPD1      | 0.58782727 | 7.35E-43 |
| PRR12      | 0.23987254 | 8.61E-43 |
| DMAC1      | 0.31352167 | 9.24E-43 |
| HOXA3      | 0.34674397 | 9.25E-43 |
| PCMTD2     | 0.24595919 | 9.35E-43 |
| PTER       | 0.21450207 | 1.29E-42 |
| GOLGA8O    | 0.23032033 | 1.43E-42 |
| LRMDA      | 0.3431264  | 1.45E-42 |
| ATP2A2     | -0.4184103 | 1.47E-42 |
| APOLD1     | 0.28482292 | 1.60E-42 |
| PLCB1      | -0.5146646 | 1.63E-42 |
| PPP6R1     | -0.4225643 | 1.65E-42 |
| AGPAT4     | -0.5129637 | 1.82E-42 |
| LPCAT2     | 0.6242482  | 2.16E-42 |
| PRH1       | 0.22148805 | 2.49E-42 |
| SARAF      | -0.4983728 | 3.27E-42 |
| HERPUD1    | -0.5052043 | 4.65E-42 |
| CMSS1      | 0.36216204 | 4.78E-42 |
| SLC35A1    | 0.22855832 | 5.33E-42 |
| NUDT1      | -0.4458739 | 5.48E-42 |

|           |            |          |
|-----------|------------|----------|
| KANK1     | 0.22195006 | 7.15E-42 |
| CYBA      | -0.499297  | 7.69E-42 |
| VPS13C    | 0.52905761 | 8.55E-42 |
| C15orf39  | -0.4372682 | 9.69E-42 |
| TNFRSF18  | -0.4633804 | 1.02E-41 |
| PPA2      | 0.33699615 | 1.04E-41 |
| PHLDA1    | -0.6597785 | 1.13E-41 |
| CD37      | -0.5559847 | 1.17E-41 |
| POGLUT1   | 0.25382378 | 1.56E-41 |
| BUD31     | -0.3919105 | 1.90E-41 |
| PNPT1     | 0.30150857 | 2.01E-41 |
| AZU1      | 1.07642114 | 2.28E-41 |
| SUDS3     | 0.22808034 | 2.34E-41 |
| ARMC10    | 0.3296715  | 2.51E-41 |
| NCL       | 0.52797347 | 2.72E-41 |
| ABCA1     | -0.3865762 | 2.77E-41 |
| NRDC      | 0.47666865 | 2.82E-41 |
| RXYLT1    | 0.3470553  | 2.93E-41 |
| P2RY8     | 0.41477776 | 3.18E-41 |
| HAT1      | -0.3859598 | 3.70E-41 |
| DAAM1     | -0.5628998 | 3.82E-41 |
| UBE2H     | -0.5357236 | 4.08E-41 |
| ABCC4     | 0.46339905 | 4.25E-41 |
| RHOF      | -0.457836  | 4.34E-41 |
| ZSWIM7    | 0.34758384 | 5.14E-41 |
| ANXA11    | -0.4027883 | 5.59E-41 |
| SPNS2     | -0.4957706 | 7.44E-41 |
| PHF14     | 0.4297929  | 7.65E-41 |
| NUP42     | 0.30592131 | 8.46E-41 |
| DLEU1     | 0.27177388 | 9.11E-41 |
| ISOC2     | 0.25245273 | 9.42E-41 |
| PPM1F     | -0.3911713 | 1.02E-40 |
| PCNA      | 0.06907133 | 1.07E-40 |
| BRD7      | 0.45819573 | 1.18E-40 |
| RRAGC     | -0.394476  | 1.19E-40 |
| RPL18A    | -0.4424739 | 1.23E-40 |
| AHSA1     | 0.29068033 | 1.25E-40 |
| GPR27     | 0.30405613 | 1.29E-40 |
| STOML3    | -0.2589197 | 1.41E-40 |
| LYRM7     | 0.40563125 | 1.56E-40 |
| OCLN      | 0.29572835 | 1.74E-40 |
| AK2       | 0.4740107  | 1.75E-40 |
| HLA-C     | -0.5735943 | 2.27E-40 |
| SLC9A3R2  | -0.5888081 | 2.50E-40 |
| STAB1     | 0.43521658 | 2.53E-40 |
| DUSP14    | -0.4205599 | 2.81E-40 |
| STARD4-AS | 0.23804696 | 3.48E-40 |
| LINC00926 | 0.21654448 | 3.75E-40 |
| MT-ND2    | 0.44750305 | 3.79E-40 |
| ACADM     | 0.42734197 | 4.03E-40 |

|            |            |          |
|------------|------------|----------|
| LINC00996  | 0.27359048 | 4.44E-40 |
| OPN3       | 0.24525757 | 4.79E-40 |
| MDN1       | 0.35446382 | 5.83E-40 |
| CD300A     | -0.4311023 | 6.41E-40 |
| CMTM6      | -0.4812539 | 7.33E-40 |
| HLA-B      | -0.5731347 | 7.80E-40 |
| MANBA      | 0.36488385 | 8.02E-40 |
| NT5C       | -0.4187658 | 8.48E-40 |
| PA2G4      | 0.52517069 | 8.58E-40 |
| NUFIP2     | 0.50541541 | 8.99E-40 |
| CKS2       | 0.28555584 | 1.05E-39 |
| NSF        | 0.24976174 | 1.23E-39 |
| HTR1F      | 0.24101942 | 1.41E-39 |
| ZNF706     | -0.4085254 | 1.45E-39 |
| NEK9       | 0.1984628  | 1.50E-39 |
| ATF3       | -0.4680496 | 1.51E-39 |
| CREB1      | 0.36159664 | 2.15E-39 |
| CREBZF     | 0.32468376 | 3.01E-39 |
| TMEM106B   | 0.31459987 | 3.11E-39 |
| MRPS34     | 0.37378815 | 3.12E-39 |
| BCL7B      | -0.384161  | 3.70E-39 |
| N4BP3      | -0.3030482 | 3.96E-39 |
| MTAP       | 0.2906581  | 4.39E-39 |
| PDGFA      | -0.3851197 | 4.63E-39 |
| SVIL       | -0.6000259 | 5.47E-39 |
| VPS37B     | -0.4500636 | 5.95E-39 |
| UBAC1      | 0.21321365 | 6.23E-39 |
| DENND6B    | -0.429822  | 6.62E-39 |
| UBE2D1     | -0.4743703 | 6.80E-39 |
| INKA1      | -0.4596347 | 7.19E-39 |
| PPP1R3E    | 0.34331282 | 7.50E-39 |
| PDCD10     | -0.4033523 | 7.74E-39 |
| FAM177A1   | -0.3571264 | 8.44E-39 |
| RHEX       | 0.65824893 | 8.92E-39 |
| TRA2B      | 0.54254375 | 1.02E-38 |
| RNF126     | -0.3392245 | 1.08E-38 |
| TESPA1     | 0.45452135 | 1.15E-38 |
| R3HDM2     | 0.4423998  | 1.18E-38 |
| CKS1B      | 0.08918227 | 1.19E-38 |
| GGCT       | 0.38186069 | 1.33E-38 |
| PCBP1-AS1  | 0.29963527 | 1.34E-38 |
| LACC1      | 0.32429495 | 1.49E-38 |
| POLR2H     | 0.23621401 | 1.53E-38 |
| AC005670.3 | 0.32926382 | 1.53E-38 |
| DPYSL3     | -0.2732731 | 1.67E-38 |
| ZNF302     | 0.31489457 | 1.82E-38 |
| TNFAIP2    | -0.595829  | 2.19E-38 |
| NREP       | 0.39705834 | 2.32E-38 |
| LINC01409  | 0.24068514 | 3.33E-38 |
| SLC35E2A   | 0.25565156 | 3.73E-38 |

|          |            |          |
|----------|------------|----------|
| TXNDC5   | 0.39224502 | 3.73E-38 |
| CKLF     | -0.7040361 | 3.79E-38 |
| REXO2    | 0.31581939 | 4.12E-38 |
| POLR3K   | 0.20973095 | 4.30E-38 |
| CCN3     | -0.3017872 | 4.44E-38 |
| PSMG4    | 0.20287828 | 4.59E-38 |
| PPP2CA   | -0.3768363 | 4.88E-38 |
| PDLIM2   | -0.3746072 | 5.08E-38 |
| AGPAT2   | -0.3210446 | 5.12E-38 |
| SDHAF3   | 0.2192507  | 5.14E-38 |
| HOMER3   | 0.37014346 | 6.68E-38 |
| TRIM25   | 0.23748351 | 7.59E-38 |
| NOP56    | 0.46980239 | 8.15E-38 |
| ZBTB20   | 0.54936087 | 8.48E-38 |
| SMC1A    | 0.32176078 | 8.70E-38 |
| MALT1    | -0.3993893 | 9.38E-38 |
| IL2RA    | -0.5217613 | 9.38E-38 |
| CD81     | 0.41563816 | 1.06E-37 |
| ZNF891   | 0.28172164 | 1.09E-37 |
| TNFRSF1B | -0.4179556 | 1.20E-37 |
| EGR1     | 0.50730669 | 1.24E-37 |
| DCTN6    | -0.394063  | 1.26E-37 |
| CDK6     | 0.4928239  | 1.26E-37 |
| RSRC2    | -0.5012935 | 1.42E-37 |
| SKAP2    | 0.49767185 | 1.50E-37 |
| PDXK     | -0.3385889 | 1.54E-37 |
| WDR3     | 0.22885903 | 1.55E-37 |
| SNAI3    | -0.4394156 | 1.65E-37 |
| NOLC1    | 0.31664472 | 1.93E-37 |
| ADPRHL2  | -0.2363282 | 1.94E-37 |
| CIAO2A   | 0.30283292 | 1.94E-37 |
| SERPINE1 | -0.3970334 | 2.26E-37 |
| WDR70    | 0.35114716 | 2.29E-37 |
| CFAP126  | -0.2004369 | 2.48E-37 |
| HSP90AB1 | 0.39234963 | 2.55E-37 |
| KIF9     | -0.4027681 | 2.57E-37 |
| DDX10    | 0.30610775 | 2.64E-37 |
| NTPCR    | 0.26630125 | 2.68E-37 |
| CREG1    | 0.48957062 | 2.72E-37 |
| UBE2V2   | 0.2836283  | 2.91E-37 |
| CORO1C   | -0.4508069 | 2.94E-37 |
| FAM111A  | 0.31626877 | 3.43E-37 |
| UQCRFS1  | -0.3986275 | 3.49E-37 |
| AKIRIN2  | -0.4039419 | 3.50E-37 |
| PSMB1    | -0.4196938 | 3.68E-37 |
| SUMO3    | 0.3005875  | 4.03E-37 |
| ZFPM1    | 0.18218738 | 4.20E-37 |
| HLA-DPA1 | -0.5966477 | 4.58E-37 |
| RRP12    | -0.5146275 | 4.90E-37 |
| RPL12    | 0.30303527 | 4.98E-37 |



|           |            |          |
|-----------|------------|----------|
| ECHDC1    | 0.28485595 | 5.57E-37 |
| ZMAT5     | 0.25247846 | 5.76E-37 |
| HIST2H2BE | -0.5064936 | 6.15E-37 |
| ME2       | 0.35116188 | 6.44E-37 |
| XYLT1     | 0.22486037 | 7.32E-37 |
| EIF5      | -0.5187415 | 7.35E-37 |
| SNHG25    | 0.35050672 | 7.66E-37 |
| FMC1      | 0.28276665 | 7.69E-37 |
| RBM17     | -0.38888   | 1.04E-36 |
| WASF2     | -0.4788275 | 1.05E-36 |
| NR1H2     | -0.3434461 | 1.09E-36 |
| EPM2AIP1  | 0.39005169 | 1.20E-36 |
| PRKCQ-AS1 | 0.26760023 | 1.32E-36 |
| POLE3     | 0.30884911 | 1.50E-36 |
| MAPKAPK3  | -0.3687337 | 1.93E-36 |
| PRRG4     | 0.28161311 | 2.10E-36 |
| WRNIP1    | 0.25427347 | 2.11E-36 |
| MCPH1     | 0.21791065 | 2.27E-36 |
| EMC3      | -0.375686  | 2.33E-36 |
| TOP1MT    | 0.30274538 | 2.65E-36 |
| ARL5A     | 0.31922137 | 2.65E-36 |
| LRRC75A   | 0.84821096 | 3.35E-36 |
| FRAT2     | 0.21517789 | 3.63E-36 |
| HDDC2     | 0.2777385  | 3.67E-36 |
| CCDC6     | -0.3550793 | 4.05E-36 |
| FAM120A   | 0.37284104 | 4.06E-36 |
| ENDOG     | 0.24530389 | 4.09E-36 |
| CD302     | 0.4675068  | 4.11E-36 |
| CAPNS1    | -0.3705517 | 4.21E-36 |
| ARL6IP1   | 0.43563402 | 4.54E-36 |
| RPL22     | 0.25366721 | 4.70E-36 |
| KCNK17    | -0.3737008 | 4.88E-36 |
| ABRAXAS1  | 0.25293721 | 4.89E-36 |
| TMEM131   | 0.34286397 | 5.12E-36 |
| ERGIC1    | -0.3525549 | 5.19E-36 |
| KAT6B     | 0.36277255 | 5.64E-36 |
| PDCD4     | 0.50955304 | 5.72E-36 |
| ADRB1     | 0.25455865 | 5.81E-36 |
| ALDOA     | 0.33823301 | 6.12E-36 |
| ARG2      | -0.2440479 | 6.37E-36 |
| UTP3      | 0.32554615 | 6.46E-36 |
| DDIT4     | -0.7759737 | 7.03E-36 |
| IGHM      | -0.6262608 | 8.20E-36 |
| INKA2     | -0.3167789 | 8.26E-36 |
| PCYOX1    | 0.20583877 | 9.01E-36 |
| TNFAIP8   | 0.55662482 | 9.49E-36 |
| DNMT1     | 0.32415907 | 9.76E-36 |
| FMNL1     | -0.4057882 | 9.98E-36 |
| DCTN3     | -0.278569  | 1.27E-35 |
| TERF2     | -0.3107813 | 1.28E-35 |

|            |            |          |
|------------|------------|----------|
| DDX18      | 0.44697212 | 1.38E-35 |
| TMX3       | 0.25807634 | 1.41E-35 |
| CRLS1      | 0.16384256 | 1.42E-35 |
| SMIM12     | -0.2530326 | 1.50E-35 |
| ACIN1      | 0.34186429 | 1.56E-35 |
| HADHA      | 0.39176053 | 1.57E-35 |
| TFAP4      | 0.16836993 | 1.67E-35 |
| TNFSF13B   | 0.51630848 | 1.73E-35 |
| CELF1      | -0.4424132 | 1.96E-35 |
| SEC14L1    | -0.3666834 | 2.05E-35 |
| PTPRA      | 0.36662341 | 2.16E-35 |
| ZNF605     | 0.23181741 | 2.17E-35 |
| GRK2       | 0.33028611 | 2.29E-35 |
| PRKACB     | 0.5552489  | 2.31E-35 |
| BRI3BP     | 0.38409632 | 2.35E-35 |
| AC007384.1 | -0.3740951 | 2.40E-35 |
| LTB        | -0.6495926 | 2.44E-35 |
| TBCA       | 0.4796246  | 2.54E-35 |
| CCDC66     | 0.25684431 | 2.56E-35 |
| FAM122C    | -0.3569966 | 2.72E-35 |
| NT5DC1     | 0.20197131 | 2.77E-35 |
| KRCC1      | 0.32101114 | 2.87E-35 |
| AC026471.4 | 0.16500295 | 3.00E-35 |
| POP5       | 0.26597297 | 3.11E-35 |
| SLC39A10   | 0.40458712 | 3.27E-35 |
| AKIRIN1    | -0.3374896 | 3.66E-35 |
| PIN4       | 0.27142341 | 3.86E-35 |
| PAXIP1-AS1 | 0.20226124 | 4.05E-35 |
| NDUFAF2    | 0.26687245 | 4.13E-35 |
| RNF130     | 0.48371972 | 4.51E-35 |
| ZNF770     | 0.25253931 | 4.72E-35 |
| ADGRG1     | -0.4810001 | 5.13E-35 |
| TRADD      | 0.14185026 | 5.50E-35 |
| ATF4       | -0.4789425 | 5.50E-35 |
| NCOA4      | 0.49209658 | 5.54E-35 |
| SKI        | 0.21727344 | 5.59E-35 |
| NOP14      | 0.27536444 | 5.76E-35 |
| HIST1H1C   | -0.9008035 | 6.18E-35 |
| USP14      | -0.4029549 | 6.47E-35 |
| VPS41      | 0.25268461 | 7.31E-35 |
| AGPAT5     | 0.32947276 | 8.50E-35 |
| ZNF431     | 0.51454309 | 8.63E-35 |
| PIK3CB     | 0.29206809 | 8.67E-35 |
| SUPT16H    | 0.42354614 | 8.98E-35 |
| CAMKK2     | 0.28936824 | 1.19E-34 |
| SAMD9      | 0.2436484  | 1.20E-34 |
| SDCBP      | -0.4361988 | 1.21E-34 |
| FAHD2A     | 0.17371829 | 1.21E-34 |
| GRN        | 0.42787836 | 1.26E-34 |
| WDR1       | -0.4055254 | 1.30E-34 |

|          |            |          |
|----------|------------|----------|
| CFAP36   | 0.49193838 | 1.33E-34 |
| MAT2B    | 0.30157585 | 1.33E-34 |
| TNFRSF14 | 0.26873099 | 1.44E-34 |
| CD2BP2   | -0.2686509 | 1.49E-34 |
| ALDH3B1  | 0.2377579  | 1.54E-34 |
| SPINT2   | -0.434893  | 1.59E-34 |
| FIRRE    | 0.24985275 | 1.76E-34 |
| EVA1B    | -0.533964  | 1.77E-34 |
| SMIM26   | 0.44019779 | 1.80E-34 |
| MORF4L2  | -0.3918882 | 1.81E-34 |
| MIR22HG  | -0.3768916 | 1.87E-34 |
| APEX1    | 0.44178425 | 2.04E-34 |
| SMIM19   | 0.26275469 | 2.08E-34 |
| TMUB1    | -0.2367677 | 2.57E-34 |
| EIF2S3   | 0.45918726 | 2.58E-34 |
| PARN     | 0.18933497 | 2.80E-34 |
| TPCN1    | 0.19840403 | 2.80E-34 |
| PPP4C    | -0.2610316 | 3.18E-34 |
| MAP1S    | -0.3603957 | 3.40E-34 |
| SMAD3    | -0.4106882 | 3.59E-34 |
| CYHR1    | 0.1453335  | 3.61E-34 |
| VPS36    | 0.39832443 | 3.81E-34 |
| SSH2     | -0.3186235 | 4.07E-34 |
| GOLGA8M  | 0.1241868  | 4.09E-34 |
| RUNX3    | -0.6649249 | 4.14E-34 |
| C1orf162 | 0.44215448 | 4.16E-34 |
| THYN1    | 0.24227594 | 4.48E-34 |
| RPL36    | 0.27760395 | 4.80E-34 |
| FKBP1A   | -0.401556  | 5.09E-34 |
| TREML2   | -0.2266026 | 5.10E-34 |
| THUMPD1  | 0.43378318 | 5.34E-34 |
| VPS53    | 0.19126208 | 5.34E-34 |
| TCF7L2   | -0.421613  | 5.42E-34 |
| BHLHE40  | -0.5708044 | 5.71E-34 |
| MTMR6    | -0.3454016 | 5.91E-34 |
| TBCB     | -0.2628773 | 6.02E-34 |
| WASIR1   | 0.14716291 | 6.07E-34 |
| CLPTM1L  | 0.21718809 | 6.07E-34 |
| METTL7A  | 0.2691589  | 6.41E-34 |
| FAM216A  | 0.25248891 | 6.51E-34 |
| ZNF493   | 0.35133005 | 6.52E-34 |
| EIF2AK1  | 0.38082218 | 6.90E-34 |
| MRPL15   | -0.3093799 | 7.03E-34 |
| NFKBID   | -0.4253665 | 7.73E-34 |
| MGA      | 0.34338199 | 8.32E-34 |
| Z83843.1 | 0.3125532  | 9.56E-34 |
| PSMA6    | -0.4205256 | 1.01E-33 |
| NPIP4    | 0.18598702 | 1.11E-33 |
| PAQR8    | -0.3492511 | 1.15E-33 |
| MSI2     | 0.62573365 | 1.16E-33 |

|            |            |          |
|------------|------------|----------|
| CEP63      | 0.37416927 | 1.35E-33 |
| CSK        | -0.3032555 | 1.41E-33 |
| SBDS       | -0.4051082 | 1.42E-33 |
| VPS26A     | -0.2822762 | 1.50E-33 |
| QSOX1      | 0.24270244 | 1.52E-33 |
| DBP        | 0.18345905 | 1.55E-33 |
| CCDC144A   | 0.31530889 | 1.61E-33 |
| KANSL1L    | 0.22063195 | 1.79E-33 |
| KCNN4      | -0.3887418 | 1.88E-33 |
| APBB1IP    | 0.37897039 | 1.99E-33 |
| AC090559.1 | 0.43237744 | 2.05E-33 |
| U2SURP     | 0.4266526  | 2.18E-33 |
| DHX40      | 0.21314231 | 2.23E-33 |
| NHLRC2     | 0.31662362 | 2.40E-33 |
| H6PD       | 0.17616428 | 2.40E-33 |
| RNF7       | -0.4078129 | 2.55E-33 |
| GSEC       | 0.16318806 | 2.78E-33 |
| SLC25A19   | 0.18721822 | 2.86E-33 |
| DDX55      | 0.23412796 | 2.95E-33 |
| STXBP4     | 0.18601866 | 2.97E-33 |
| NFKBIA     | -0.9491557 | 3.24E-33 |
| RNF44      | 0.22944686 | 3.25E-33 |
| GUK1       | -0.3377141 | 3.91E-33 |
| TACC3      | 0.24275695 | 4.00E-33 |
| EMID1      | 0.20404658 | 4.12E-33 |
| CDK9       | -0.3380903 | 4.20E-33 |
| AL450998.2 | 0.21274402 | 4.54E-33 |
| GRK3       | 0.21586572 | 4.64E-33 |
| SMAD5      | 0.27293334 | 4.67E-33 |
| RGS19      | -0.4948077 | 6.06E-33 |
| UBE2A      | -0.3286283 | 6.13E-33 |
| DDX46      | 0.42422281 | 6.44E-33 |
| SMARCAD1   | 0.25115275 | 7.14E-33 |
| SRM        | 0.40466855 | 7.27E-33 |
| TCAIM      | 0.24371247 | 7.30E-33 |
| COPRS      | 0.1888101  | 7.48E-33 |
| GLUL       | -0.6454601 | 7.50E-33 |
| SLC39A11   | 0.16720177 | 7.60E-33 |
| TSSC4      | -0.2049183 | 8.96E-33 |
| TMEM251    | 0.16903598 | 9.85E-33 |
| PAFAH1B2   | -0.3253229 | 1.01E-32 |
| CCDC12     | -0.3762214 | 1.08E-32 |
| NMI        | 0.36006278 | 1.12E-32 |
| ATP2B4     | 0.26504365 | 1.13E-32 |
| ZNF138     | 0.2235286  | 1.22E-32 |
| ZRANB2     | 0.48473157 | 1.24E-32 |
| USP4       | -0.2833463 | 1.28E-32 |
| TRAF5      | -0.4160838 | 1.41E-32 |
| SLC25A46   | 0.24268075 | 1.55E-32 |
| OSER1      | -0.241347  | 1.56E-32 |

|           |            |          |
|-----------|------------|----------|
| OTUD6B-AS | 0.30045076 | 1.62E-32 |
| PTPN6     | -0.4976453 | 1.64E-32 |
| METAP2    | 0.4152693  | 1.82E-32 |
| GTF2H2C   | 0.17766929 | 1.92E-32 |
| ITGB1     | 0.25865716 | 1.94E-32 |
| PIGF      | 0.22481742 | 1.95E-32 |
| HP1BP3    | 0.41095963 | 2.03E-32 |
| ARF1      | -0.452891  | 2.08E-32 |
| SPAG9     | -0.4298882 | 2.20E-32 |
| CD58      | -0.4388751 | 2.20E-32 |
| ARHGAP30  | -0.411339  | 2.33E-32 |
| RAB5A     | -0.3548939 | 2.34E-32 |
| MLF2      | -0.3107131 | 2.78E-32 |
| DNTTIP1   | -0.2466679 | 3.04E-32 |
| MRPL3     | 0.35253679 | 3.25E-32 |
| XAF1      | 0.35361211 | 3.31E-32 |
| PSMG1     | 0.15161963 | 3.61E-32 |
| NMNAT3    | 0.16788638 | 3.72E-32 |
| TTC14     | 0.38175541 | 3.72E-32 |
| DOCK10    | 0.26132662 | 3.81E-32 |
| DGKD      | -0.3417781 | 3.87E-32 |
| BLOC1S2   | -0.2817986 | 4.05E-32 |
| GNL3L     | 0.23122531 | 4.22E-32 |
| ATIC      | 0.28483086 | 4.27E-32 |
| MRPS31    | 0.29786647 | 4.40E-32 |
| NXT2      | 0.23573053 | 4.56E-32 |
| ARID3B    | -0.3370941 | 5.06E-32 |
| CNBP      | 0.38799433 | 5.15E-32 |
| ATG101    | -0.2778418 | 5.20E-32 |
| ANO6      | 0.2009318  | 5.30E-32 |
| PYURF     | 0.35992703 | 5.94E-32 |
| ACTR1B    | -0.3327144 | 7.02E-32 |
| C11orf68  | -0.2171116 | 7.65E-32 |
| SCAND1    | -0.3540333 | 7.79E-32 |
| DDX1      | 0.30188381 | 8.57E-32 |
| ARL11     | 0.25359929 | 8.67E-32 |
| MYCBP2    | 0.4601664  | 9.00E-32 |
| CENPX     | 0.19990258 | 9.25E-32 |
| M6PR      | 0.37823952 | 9.30E-32 |
| ADK       | 0.35750719 | 9.67E-32 |
| KRT10     | 0.3390173  | 9.85E-32 |
| SLC30A9   | 0.21905017 | 9.97E-32 |
| TBC1D5    | 0.33563182 | 1.04E-31 |
| NUDT4     | 0.18286428 | 1.12E-31 |
| GRK6      | -0.268668  | 1.12E-31 |
| SELENOK   | -0.2646196 | 1.14E-31 |
| ALG3      | 0.13714574 | 1.22E-31 |
| PPIB      | -0.4526098 | 1.24E-31 |
| FLYWCH2   | 0.16169244 | 1.27E-31 |
| KRIT1     | 0.14906725 | 1.31E-31 |

|           |            |          |
|-----------|------------|----------|
| SOD2      | -0.5318999 | 1.39E-31 |
| TTF2      | 0.20715632 | 1.40E-31 |
| NSD1      | 0.26699321 | 1.43E-31 |
| PET117    | 0.15099008 | 1.45E-31 |
| TRIB1     | -0.3645136 | 1.45E-31 |
| SLC39A4   | 0.22104948 | 1.47E-31 |
| TMEM80    | 0.16714081 | 1.50E-31 |
| ATP6V0A2  | 0.3868928  | 1.50E-31 |
| DNAJB11   | -0.3075516 | 1.53E-31 |
| TMA7      | 0.33995114 | 1.55E-31 |
| SIGIRR    | -0.3009514 | 1.62E-31 |
| RAB14     | -0.398415  | 1.63E-31 |
| UBE2J1    | -0.4419185 | 1.64E-31 |
| RUVBL1    | 0.25413241 | 1.64E-31 |
| GNG7      | 0.1802829  | 1.93E-31 |
| CPSF2     | 0.27029075 | 1.95E-31 |
| FAM228B   | 0.2126751  | 2.00E-31 |
| ENTPD1-AS | 0.16133921 | 2.04E-31 |
| ARPC1A    | -0.2686188 | 2.26E-31 |
| COX15     | 0.13590214 | 2.42E-31 |
| RRP9      | 0.14539807 | 2.51E-31 |
| OCEL1     | 0.1871114  | 2.53E-31 |
| SH3BP2    | -0.4741738 | 2.67E-31 |
| FAM210B   | 0.25770258 | 3.11E-31 |
| GPATCH11  | -0.4148099 | 3.28E-31 |
| ATRN      | 0.16226595 | 3.73E-31 |
| SLC43A3   | -0.3552513 | 4.19E-31 |
| TMCO1     | 0.39910732 | 4.23E-31 |
| NRROS     | 0.06516747 | 4.48E-31 |
| COMMD9    | 0.233016   | 4.48E-31 |
| MRPL54    | -0.2545425 | 4.60E-31 |
| GLB1      | 0.1598275  | 4.61E-31 |
| SYNE3     | -0.4356416 | 4.72E-31 |
| TMPO      | 0.30735745 | 4.81E-31 |
| FHL1      | -0.2860961 | 4.92E-31 |
| IL12A-AS1 | 0.31823052 | 4.96E-31 |
| CTNNB1    | -0.4820023 | 4.99E-31 |
| ZBTB16    | 0.44106187 | 5.20E-31 |
| DEAF1     | 0.22445211 | 5.26E-31 |
| HSD17B12  | 0.32218421 | 5.32E-31 |
| SMIM8     | 0.24056646 | 5.36E-31 |
| COA6      | 0.25654162 | 5.78E-31 |
| THOC3     | 0.21734721 | 6.02E-31 |
| ZNF480    | 0.22569096 | 6.35E-31 |
| RNF11     | -0.3204718 | 6.37E-31 |
| ZMPSTE24  | 0.14418485 | 6.99E-31 |
| CETN3     | 0.15066779 | 7.04E-31 |
| CD53      | -0.4659003 | 7.37E-31 |
| VASP      | -0.5096073 | 7.88E-31 |
| RSAD1     | 0.14505582 | 8.15E-31 |

|            |            |          |
|------------|------------|----------|
| CARNMT1    | 0.23130069 | 8.21E-31 |
| ASRGL1     | 0.22102529 | 8.32E-31 |
| LY75       | 0.37342636 | 8.90E-31 |
| N4BP2      | -0.4326062 | 9.15E-31 |
| SEH1L      | 0.2102059  | 9.35E-31 |
| HCG11      | 0.21499849 | 9.39E-31 |
| MCEE       | 0.14167312 | 1.03E-30 |
| TARSL2     | 0.24877616 | 1.05E-30 |
| GUCY1A1    | 0.45198963 | 1.12E-30 |
| ANXA6      | -0.2981276 | 1.15E-30 |
| LZIC       | 0.19878461 | 1.17E-30 |
| MAPRE1     | -0.2623923 | 1.18E-30 |
| OSBPL1A    | 0.22089058 | 1.20E-30 |
| TES        | -0.5489501 | 1.24E-30 |
| SNRPE      | 0.38544699 | 1.25E-30 |
| MRPS5      | 0.27555693 | 1.28E-30 |
| TMEM192    | 0.25169203 | 1.32E-30 |
| ARF3       | -0.2863478 | 1.46E-30 |
| MPV17L     | 0.15676584 | 1.55E-30 |
| CBR1       | 0.23466982 | 1.60E-30 |
| NPIP5      | 0.20038006 | 1.61E-30 |
| DCP1A      | -0.3339461 | 1.63E-30 |
| ELP4       | 0.13963194 | 1.70E-30 |
| LSM1       | -0.1958749 | 1.72E-30 |
| PCID2      | 0.23525844 | 1.78E-30 |
| RPS15A     | 0.25876722 | 1.80E-30 |
| EHD1       | -0.4275444 | 1.86E-30 |
| SATB1-AS1  | 0.28222589 | 1.94E-30 |
| ORMDL2     | -0.3014493 | 1.94E-30 |
| CSTB       | -0.364303  | 2.07E-30 |
| AC092747.4 | 0.24717893 | 2.25E-30 |
| ZDHHC21    | 0.2782662  | 2.26E-30 |
| LINC01355  | 0.17459916 | 2.42E-30 |
| LINC01252  | 0.14679125 | 2.68E-30 |
| TRIM8      | -0.390283  | 2.69E-30 |
| NRX1       | -0.4439204 | 2.74E-30 |
| TOX4       | -0.3028705 | 2.78E-30 |
| RIPK2      | -0.3962663 | 2.81E-30 |
| STX17      | 0.26275073 | 2.83E-30 |
| C9orf139   | 0.39675624 | 2.88E-30 |
| NUCB2      | 0.53232084 | 2.89E-30 |
| PPT1       | 0.31112455 | 2.97E-30 |
| CLEC12A    | 0.29753642 | 3.08E-30 |
| CTNBL1     | 0.20639487 | 3.33E-30 |
| ENTR1      | 0.22062829 | 3.76E-30 |
| HOXA6      | 0.18799357 | 3.85E-30 |
| AGGF1      | 0.19596874 | 3.95E-30 |
| SLC20A2    | 0.20277273 | 4.04E-30 |
| LAIR1      | 0.43745806 | 4.21E-30 |
| PTPN2      | 0.33432792 | 4.32E-30 |

|            |            |          |
|------------|------------|----------|
| GLUD1      | -0.2667669 | 4.32E-30 |
| DDX39A     | 0.19224445 | 4.52E-30 |
| RHOT1      | 0.24020175 | 4.52E-30 |
| EIF4A2     | 0.3733174  | 4.64E-30 |
| POLR2J3    | 0.42301056 | 4.83E-30 |
| EMD        | -0.2671798 | 4.92E-30 |
| NDUFV3     | 0.28708183 | 5.01E-30 |
| MCM3AP-AS  | 0.1555578  | 5.28E-30 |
| CEBPA      | 0.51440765 | 5.35E-30 |
| NAA38      | 0.35147025 | 5.57E-30 |
| RECQL      | 0.24499381 | 5.82E-30 |
| KTN1       | 0.44885748 | 5.88E-30 |
| TFEC       | 0.37373748 | 6.10E-30 |
| MFSD14C    | 0.19485191 | 6.22E-30 |
| SH3YL1     | 0.18118204 | 6.25E-30 |
| QKI        | 0.36420142 | 6.39E-30 |
| IDH1       | 0.30466422 | 6.87E-30 |
| C1GALT1C1  | 0.20013205 | 7.02E-30 |
| INTS8      | 0.17678257 | 8.08E-30 |
| TST        | 0.22796363 | 8.97E-30 |
| SPG21      | 0.18030904 | 8.98E-30 |
| TRIM28     | 0.17377228 | 9.47E-30 |
| IRF2BPL    | -0.3386974 | 9.67E-30 |
| SPG11      | 0.28297474 | 9.80E-30 |
| LINC00665  | 0.23542832 | 9.93E-30 |
| PMS1       | 0.1960397  | 9.95E-30 |
| SF3B5      | -0.3513859 | 9.99E-30 |
| MRPS9      | 0.15243872 | 1.02E-29 |
| OARD1      | 0.21512321 | 1.08E-29 |
| CMPK1      | 0.27840592 | 1.08E-29 |
| PLEKHO2    | -0.3747331 | 1.12E-29 |
| SNCA       | 0.19982107 | 1.18E-29 |
| MAPKAP1    | 0.19296056 | 1.24E-29 |
| OAZ2       | -0.3392456 | 1.25E-29 |
| AC016831.5 | -0.3582611 | 1.26E-29 |
| ANKRD27    | 0.19999606 | 1.28E-29 |
| JAML       | -0.3330054 | 1.30E-29 |
| ZNF638     | 0.38503587 | 1.30E-29 |
| NFATC2     | -0.3131696 | 1.35E-29 |
| SERINC1    | -0.3599892 | 1.36E-29 |
| ATP6V0C    | -0.4408289 | 1.37E-29 |
| RABEPK     | 0.12554757 | 1.40E-29 |
| FOPNL      | 0.19956506 | 1.44E-29 |
| APOL1      | 0.11625287 | 1.46E-29 |
| HEXD       | 0.18553887 | 1.55E-29 |
| TSC22D4    | 0.08691065 | 1.59E-29 |
| METAP1D    | 0.13729962 | 1.75E-29 |
| BRD3       | 0.18965078 | 1.75E-29 |
| PYCR2      | 0.16696151 | 1.90E-29 |
| EIF4G3     | 0.22799937 | 1.92E-29 |



|           |            |          |
|-----------|------------|----------|
| NSUN6     | 0.17557685 | 1.94E-29 |
| CYB5R3    | -0.2808014 | 1.97E-29 |
| MAPK1IP1L | -0.3836732 | 2.00E-29 |
| STAU2     | 0.15268189 | 2.42E-29 |
| IFITM3    | -0.4200258 | 2.43E-29 |
| MIER1     | -0.403308  | 2.47E-29 |
| PACSIN2   | -0.3346349 | 2.51E-29 |
| AIMP1     | 0.36013001 | 2.52E-29 |
| ATG14     | 0.12883993 | 2.56E-29 |
| HNRNPA1   | -0.3843186 | 2.57E-29 |
| ZNF117    | 0.23606841 | 2.78E-29 |
| PUS7L     | 0.28044103 | 2.79E-29 |
| TBCK      | 0.20435905 | 2.85E-29 |
| RTF2      | -0.2879348 | 2.88E-29 |
| NDUFA13   | -0.3681043 | 3.03E-29 |
| LLPH      | 0.29585822 | 3.07E-29 |
| BMI1      | 0.29543308 | 3.14E-29 |
| CORO1A    | -0.4596609 | 3.15E-29 |
| CRTAP     | 0.27069672 | 3.26E-29 |
| PBDC1     | -0.334966  | 3.45E-29 |
| MPHOSPH8  | 0.36723779 | 3.68E-29 |
| COG2      | 0.16887414 | 3.91E-29 |
| EEF1AKNM1 | 0.17646236 | 3.93E-29 |
| ZNF708    | 0.22669362 | 3.94E-29 |
| GGNBP2    | -0.3391014 | 4.12E-29 |
| CHIC2     | -0.2971546 | 4.66E-29 |
| ATP5ME    | 0.39144272 | 4.67E-29 |
| IMP3      | 0.36064104 | 4.68E-29 |
| GPX4      | 0.3619734  | 4.69E-29 |
| ZNF322    | 0.17681241 | 4.71E-29 |
| CSF2RB    | 0.56270538 | 4.73E-29 |
| CEP290    | 0.38259095 | 4.83E-29 |
| ZCCHC7    | 0.2986809  | 4.84E-29 |
| PRKAA1    | -0.3965226 | 5.19E-29 |
| ZNF487    | -0.306268  | 5.60E-29 |
| VPS72     | 0.11610762 | 5.66E-29 |
| SAMD1     | 0.17398517 | 5.81E-29 |
| GPR132    | -0.2941709 | 5.92E-29 |
| PTPN22    | 0.21909319 | 6.02E-29 |
| DEDD2     | -0.3523087 | 6.11E-29 |
| MARCKSL1  | -0.5381294 | 6.13E-29 |
| SNHG30    | 0.18494092 | 6.41E-29 |
| MTHFD1    | 0.14597722 | 6.42E-29 |
| THOC1     | 0.24826101 | 6.71E-29 |
| MCM3      | 0.07971219 | 6.79E-29 |
| DGCR6L    | 0.12924523 | 6.88E-29 |
| SELENOW   | -0.3926889 | 6.97E-29 |
| PIGN      | 0.16618978 | 7.05E-29 |
| ERCC6L2   | 0.21369078 | 7.07E-29 |
| ZBTB21    | -0.3205534 | 7.35E-29 |

|            |            |          |
|------------|------------|----------|
| FAM174C    | 0.23694098 | 7.52E-29 |
| MFSD6      | -0.391697  | 7.54E-29 |
| ACTL6A     | 0.19633983 | 7.68E-29 |
| KANTR      | 0.18191493 | 7.82E-29 |
| AC025040.1 | 0.15731482 | 9.33E-29 |
| REXO4      | 0.25057285 | 9.49E-29 |
| TLN1       | 0.3810722  | 9.61E-29 |
| SCAMP1-AS  | 0.14106403 | 9.77E-29 |
| MPC1       | 0.22661555 | 1.05E-28 |
| CD83       | -0.4175293 | 1.06E-28 |
| AC104041.1 | 0.11628115 | 1.06E-28 |
| GLMN       | 0.21205777 | 1.08E-28 |
| AC068587.4 | 0.26410398 | 1.09E-28 |
| IRAK3      | 0.41699248 | 1.29E-28 |
| PTPMT1     | 0.23547308 | 1.35E-28 |
| FADD       | -0.2642832 | 1.37E-28 |
| THOC7      | 0.37346427 | 1.39E-28 |
| PGM2       | 0.20572925 | 1.42E-28 |
| BCLAF1     | 0.35103277 | 1.45E-28 |
| CCDC107    | -0.2466851 | 1.51E-28 |
| BCKDHB     | 0.153623   | 1.52E-28 |
| ABHD10     | 0.08538558 | 1.56E-28 |
| PRMT3      | 0.15774348 | 1.82E-28 |
| MTR        | 0.29876936 | 1.84E-28 |
| SCAMP1     | 0.18318156 | 1.88E-28 |
| DNPB1      | 0.32288829 | 1.94E-28 |
| IPO8       | 0.2151322  | 1.99E-28 |
| NFE2L2     | -0.3737442 | 2.07E-28 |
| NCBP2      | 0.32502507 | 2.19E-28 |
| FKBP2      | 0.15802719 | 2.23E-28 |
| CEBPG      | -0.3195527 | 2.31E-28 |
| SEC22B     | 0.24527071 | 2.33E-28 |
| NFYB       | 0.22481053 | 2.41E-28 |
| C15orf61   | 0.10833529 | 2.46E-28 |
| EIF3I      | -0.3821379 | 2.46E-28 |
| EIF3E      | 0.34227199 | 2.48E-28 |
| MGRN1      | -0.2171695 | 2.65E-28 |
| SCARB1     | 0.16932413 | 2.67E-28 |
| KCNAB2     | 0.338701   | 2.78E-28 |
| FKBP4      | 0.24519543 | 2.80E-28 |
| EGLN2      | -0.2591941 | 2.81E-28 |
| SRBD1      | 0.22649854 | 2.87E-28 |
| PPWD1      | 0.27599366 | 2.89E-28 |
| CARF       | 0.18242557 | 2.95E-28 |
| ARL2       | 0.19072806 | 2.95E-28 |
| DPYD       | 0.1729577  | 3.13E-28 |
| MTX2       | 0.16923194 | 3.20E-28 |
| ARHGEF6    | 0.30147505 | 3.26E-28 |
| TOB2       | -0.3607305 | 3.28E-28 |
| AC019205.1 | 0.14846977 | 3.29E-28 |

|            |            |          |
|------------|------------|----------|
| STX12      | -0.2596322 | 3.40E-28 |
| TXNDC9     | -0.1865364 | 3.48E-28 |
| PPP1R16B   | -0.2528423 | 3.55E-28 |
| TAF12      | 0.23816561 | 3.61E-28 |
| TCTN3      | 0.15782682 | 3.64E-28 |
| GTPBP10    | 0.16650379 | 3.77E-28 |
| SPTSSA     | 0.20526657 | 3.82E-28 |
| PM20D2     | 0.21421826 | 3.83E-28 |
| SRP9       | 0.27871436 | 3.91E-28 |
| SRPRB      | 0.17183681 | 4.07E-28 |
| ORC2       | 0.16459697 | 4.32E-28 |
| IFITM2     | -0.3781125 | 4.35E-28 |
| NECAP2     | -0.273872  | 4.38E-28 |
| RCN2       | 0.20161119 | 4.45E-28 |
| RNF144A    | 0.2021617  | 4.89E-28 |
| RPL36AL    | -0.3300227 | 4.92E-28 |
| PGM2L1     | -0.328158  | 5.05E-28 |
| PBXIP1     | -0.2851914 | 5.05E-28 |
| ABRACL     | 0.43462913 | 5.09E-28 |
| TNNI2      | -0.281252  | 5.58E-28 |
| AHI1       | 0.20874833 | 5.78E-28 |
| CDC42SE1   | -0.3502598 | 5.86E-28 |
| BRD8       | 0.28987694 | 5.89E-28 |
| NSUN2      | 0.07572752 | 6.29E-28 |
| LINC00899  | 0.27363663 | 6.38E-28 |
| FASTKD1    | 0.21697684 | 6.55E-28 |
| CDK11A     | 0.16095939 | 6.72E-28 |
| MGAT1      | -0.3385451 | 6.78E-28 |
| OSGIN2     | -0.3469419 | 6.96E-28 |
| BAHCC1     | 0.38849137 | 7.02E-28 |
| COA3       | 0.22804776 | 7.04E-28 |
| ARFGAP2    | -0.222146  | 7.13E-28 |
| ATE1       | 0.1760175  | 7.26E-28 |
| FAH        | 0.2452088  | 7.63E-28 |
| THOC2      | 0.37043755 | 7.72E-28 |
| SLC3A2     | -0.3386881 | 8.13E-28 |
| CCT5       | 0.36536667 | 8.28E-28 |
| CDYL       | 0.23139559 | 8.73E-28 |
| EAPP       | -0.3041257 | 8.74E-28 |
| RNF19B     | -0.3022346 | 8.80E-28 |
| TRUB2      | 0.16192076 | 9.56E-28 |
| PLEKHF1    | -0.2850341 | 9.63E-28 |
| GFI1       | 0.2596344  | 1.09E-27 |
| HSPA1A     | 0.10280119 | 1.11E-27 |
| SSBP3      | 0.264116   | 1.15E-27 |
| ITGB3BP    | 0.23733206 | 1.17E-27 |
| PIBF1      | 0.20315581 | 1.18E-27 |
| FBXO9      | 0.2152357  | 1.21E-27 |
| AL592183.1 | 0.16637926 | 1.23E-27 |
| PDCD6IP    | 0.34813116 | 1.30E-27 |

|           |            |          |
|-----------|------------|----------|
| ELL2      | -0.3327745 | 1.34E-27 |
| TMEM14C   | 0.37121397 | 1.35E-27 |
| CDC42EP3  | -0.4422119 | 1.37E-27 |
| PMVK      | 0.16593916 | 1.41E-27 |
| C5orf24   | 0.23989095 | 1.42E-27 |
| HUWE1     | 0.26553819 | 1.43E-27 |
| MIA3      | 0.27083139 | 1.50E-27 |
| TMEM189   | -0.2049936 | 1.50E-27 |
| ERMP1     | 0.18996647 | 1.51E-27 |
| PPCDC     | -0.2837469 | 1.65E-27 |
| INTS10    | 0.21874849 | 1.65E-27 |
| IAH1      | -0.2713603 | 1.68E-27 |
| WDR36     | 0.1676739  | 1.71E-27 |
| MAPK1     | -0.3534432 | 1.72E-27 |
| POLR2F    | 0.26728655 | 1.75E-27 |
| NUDCD2    | 0.24461899 | 1.75E-27 |
| TRPS1     | -0.3604156 | 1.85E-27 |
| USP48     | 0.32889516 | 1.89E-27 |
| FAM214B   | -0.304161  | 2.01E-27 |
| HLA-E     | -0.4377006 | 2.02E-27 |
| DUSP23    | 0.24555851 | 2.10E-27 |
| CEP41     | 0.17662495 | 2.18E-27 |
| SRSF1     | 0.30814129 | 2.40E-27 |
| CALM3     | -0.2679272 | 2.52E-27 |
| SLC16A3   | -0.3943807 | 2.67E-27 |
| ASPSCR1   | 0.12370157 | 2.69E-27 |
| LRIF1     | 0.24115076 | 2.69E-27 |
| STK40     | -0.30092   | 2.74E-27 |
| NBPF19    | 0.19616831 | 2.75E-27 |
| PAFAH1B1  | -0.3169558 | 2.89E-27 |
| CWC25     | -0.2816155 | 2.93E-27 |
| TTC37     | 0.33117218 | 2.99E-27 |
| IFT27     | 0.13174274 | 3.14E-27 |
| RNFT1     | 0.16416411 | 3.37E-27 |
| EPRS      | 0.30558435 | 3.44E-27 |
| ZMYM3     | 0.12467729 | 3.61E-27 |
| DNAJA2    | -0.3294618 | 3.62E-27 |
| CHD2      | -0.5046702 | 3.65E-27 |
| FOSL1     | -0.2468022 | 3.81E-27 |
| PRKAG2-AS | 0.15615789 | 3.94E-27 |
| ACO1      | 0.14564138 | 3.94E-27 |
| STAG3     | 0.12707878 | 3.96E-27 |
| SLC33A1   | 0.16740341 | 3.97E-27 |
| HIKESHI   | 0.24979082 | 4.03E-27 |
| CDK2AP2   | -0.0869448 | 4.20E-27 |
| RPL28     | -0.2694285 | 4.38E-27 |
| EHMT1     | 0.24512621 | 4.42E-27 |
| MFSD14A   | -0.2252297 | 4.53E-27 |
| ZNF121    | 0.19089171 | 4.57E-27 |
| MCM7      | -0.0438841 | 4.57E-27 |

|            |            |          |
|------------|------------|----------|
| UBE2L3     | -0.3608081 | 4.63E-27 |
| IRF5       | 0.15327948 | 4.68E-27 |
| DPY19L4    | 0.22222626 | 4.91E-27 |
| WASHC5     | 0.14447611 | 4.93E-27 |
| ADGRA3     | 0.11514962 | 5.08E-27 |
| CDS2       | -0.2838769 | 5.17E-27 |
| ZNF397     | 0.22260458 | 5.43E-27 |
| PHKB       | 0.28404035 | 5.43E-27 |
| ZNF780B    | 0.16959589 | 5.44E-27 |
| ZNF622     | -0.1918225 | 5.45E-27 |
| RELT       | -0.3372461 | 5.45E-27 |
| DCXR       | 0.27401963 | 5.59E-27 |
| NFKB1      | -0.2933622 | 5.64E-27 |
| FBRS       | -0.2079029 | 5.68E-27 |
| OCIAD1     | 0.35641981 | 5.75E-27 |
| AKAP8L     | -0.2621665 | 5.82E-27 |
| RBM27      | -0.3165796 | 5.86E-27 |
| RALY       | -0.2685076 | 5.89E-27 |
| ZNF253     | 0.18342556 | 5.91E-27 |
| HENMT1     | 0.19436105 | 5.98E-27 |
| ZEB2       | 0.53770624 | 6.00E-27 |
| STARD3NL   | -0.2106993 | 6.60E-27 |
| AC005261.1 | 0.16992995 | 6.70E-27 |
| GFOD1      | -0.422092  | 6.84E-27 |
| GNS        | 0.17794184 | 7.01E-27 |
| STXBP5     | 0.37395612 | 7.09E-27 |
| ZNF718     | 0.14008174 | 7.39E-27 |
| MAPRE2     | -0.3341586 | 7.54E-27 |
| CDK4       | 0.17582915 | 7.59E-27 |
| IER2       | -0.6213645 | 7.68E-27 |
| NRG4       | 0.27886337 | 8.23E-27 |
| BAIAP2-DT  | -0.2246948 | 8.23E-27 |
| DHPS       | 0.17023419 | 8.61E-27 |
| PLXNC1     | 0.27741057 | 8.93E-27 |
| C22orf34   | 0.13261186 | 9.66E-27 |
| EXOSC2     | 0.12570261 | 9.78E-27 |
| ATR        | 0.3387435  | 9.84E-27 |
| STIM2      | -0.2393211 | 9.92E-27 |
| URM1       | -0.158088  | 1.04E-26 |
| TM9SF2     | 0.26629028 | 1.10E-26 |
| LDHB       | 0.35677221 | 1.11E-26 |
| ITPR2      | 0.33291618 | 1.19E-26 |
| RHEB       | -0.2653882 | 1.20E-26 |
| RAB32      | 0.5259165  | 1.23E-26 |
| MINCR      | 0.18264609 | 1.23E-26 |
| PSMB8-AS1  | 0.15221293 | 1.23E-26 |
| TM7SF3     | 0.44419647 | 1.26E-26 |
| UQCC2      | 0.20120612 | 1.27E-26 |
| SKA2       | 0.20592345 | 1.31E-26 |
| MCOLN1     | 0.12429653 | 1.40E-26 |

|           |            |          |
|-----------|------------|----------|
| ADRM1     | -0.2021471 | 1.41E-26 |
| HIBADH    | 0.16765498 | 1.43E-26 |
| NSRP1     | 0.38325866 | 1.44E-26 |
| CDK19     | 0.18572173 | 1.44E-26 |
| DOK2      | -0.3818436 | 1.48E-26 |
| TMEM11    | -0.1337068 | 1.49E-26 |
| GADD45B   | -0.4481215 | 1.53E-26 |
| mars-02   | 0.09868124 | 1.53E-26 |
| ACADVL    | -0.2313394 | 1.59E-26 |
| CAMLG     | 0.45372283 | 1.61E-26 |
| ACOT13    | 0.21564325 | 1.67E-26 |
| DIMT1     | 0.20998891 | 1.68E-26 |
| ACOX1     | 0.12934168 | 1.70E-26 |
| LNPEP     | 0.30536971 | 1.74E-26 |
| NDUFB6    | 0.28290419 | 1.76E-26 |
| IGFLR1    | 0.2344407  | 1.80E-26 |
| PCMT1     | 0.28610306 | 1.83E-26 |
| HDAC3     | 0.01084095 | 1.91E-26 |
| SYNC      | 0.18989854 | 1.91E-26 |
| PSMF1     | -0.1502123 | 1.94E-26 |
| ZNF511    | -0.1442019 | 1.97E-26 |
| GART      | 0.26831953 | 2.01E-26 |
| HELB      | 0.22577874 | 2.02E-26 |
| ZNF248    | 0.16826501 | 2.06E-26 |
| EFTUD2    | 0.10881153 | 2.09E-26 |
| XPOT      | 0.27764714 | 2.17E-26 |
| FAM83G    | -0.2137313 | 2.19E-26 |
| PIN1      | -0.1438636 | 2.22E-26 |
| NCKAP1L   | 0.31236549 | 2.47E-26 |
| PNMA1     | -0.3009372 | 2.63E-26 |
| SELENOF   | 0.26461864 | 2.65E-26 |
| FKBP8     | -0.3110841 | 2.66E-26 |
| AIP       | 0.01556304 | 2.69E-26 |
| PIGP      | 0.2297636  | 2.74E-26 |
| SAMD4B    | -0.21835   | 2.89E-26 |
| LCOR      | -0.2846748 | 2.91E-26 |
| NBPF14    | 0.15223684 | 2.91E-26 |
| STAMBP    | 0.16853311 | 2.99E-26 |
| GNA12     | 0.29506593 | 2.99E-26 |
| ACTG1     | -0.3614134 | 3.04E-26 |
| RUFY1     | 0.24982127 | 3.13E-26 |
| RPARP-AS1 | 0.28276702 | 3.17E-26 |
| ATG7      | 0.15592883 | 3.19E-26 |
| ZNF26     | 0.26382218 | 3.27E-26 |
| NUDCD1    | 0.16708363 | 3.28E-26 |
| RAB8B     | -0.3674627 | 3.36E-26 |
| DCTN2     | -0.2007948 | 3.46E-26 |
| SLC5A3    | -0.4041046 | 3.47E-26 |
| CBL       | -0.261548  | 3.49E-26 |
| R3HDM1    | 0.22839607 | 3.62E-26 |

|         |            |          |
|---------|------------|----------|
| SMIM27  | 0.27217718 | 3.63E-26 |
| SH3BP5  | -0.2903014 | 3.74E-26 |
| TIMMDC1 | 0.23938903 | 3.77E-26 |
| WASHC2C | 0.21486022 | 3.82E-26 |
| MTIF2   | 0.2397714  | 3.89E-26 |
| RPS27L  | 0.38637934 | 3.91E-26 |
| TIA1    | 0.3241025  | 3.93E-26 |
| N4BP2L2 | 0.4338013  | 4.07E-26 |
| NARS2   | 0.13060118 | 4.31E-26 |
| TCP1    | -0.2593767 | 4.34E-26 |
| SNRPD3  | 0.30682948 | 4.51E-26 |
| TTN     | 0.10563367 | 4.59E-26 |
| FAM172A | 0.14107829 | 4.62E-26 |
| PGRMC2  | 0.21877663 | 4.72E-26 |
| GRPEL1  | 0.1555833  | 4.98E-26 |
| DPH5    | 0.13405421 | 5.12E-26 |
| ZNF439  | 0.17737254 | 5.18E-26 |
| PECAM1  | 0.29617178 | 5.21E-26 |
| MTHFS   | 0.17693646 | 5.27E-26 |
| PLEKHJ1 | -0.1827706 | 5.48E-26 |
| PAM16   | 0.22153709 | 5.52E-26 |
| ZMYM1   | 0.13367611 | 5.78E-26 |
| PMS2    | 0.18460576 | 6.04E-26 |
| FOXO3   | -0.2936881 | 6.34E-26 |
| EIF4H   | -0.3212471 | 6.35E-26 |
| SF3B3   | 0.19084631 | 6.68E-26 |
| TCAF1   | 0.21946675 | 6.80E-26 |
| TFPI    | -0.4659557 | 6.83E-26 |
| MRPS33  | 0.34336986 | 6.88E-26 |
| ZNF814  | 0.19749205 | 6.92E-26 |
| ABCG1   | -0.2948183 | 7.01E-26 |
| TUBGCP4 | 0.18483218 | 7.13E-26 |
| ALPK1   | 0.15165445 | 7.39E-26 |
| PRMT2   | -0.2807796 | 7.41E-26 |
| TNIP2   | -0.1871373 | 7.41E-26 |
| PPIL3   | 0.09847601 | 7.55E-26 |
| LDLR    | -0.3360241 | 7.84E-26 |
| BDH2    | 0.15939491 | 8.03E-26 |
| ARL17A  | 0.1376122  | 8.03E-26 |
| TAF1    | 0.15692332 | 8.23E-26 |
| CHROMR  | 0.24612376 | 8.30E-26 |
| FES     | 0.1655555  | 8.37E-26 |
| GCA     | 0.19092103 | 9.04E-26 |
| SMIM30  | 0.19124556 | 9.06E-26 |
| SELENOT | -0.2868267 | 9.46E-26 |
| ARF4    | -0.3444468 | 9.48E-26 |
| TMEM245 | 0.20880135 | 9.49E-26 |
| TINF2   | -0.2506078 | 9.81E-26 |
| IFNGR2  | -0.1772552 | 1.04E-25 |
| NPTN    | 0.09002395 | 1.06E-25 |

|            |            |          |
|------------|------------|----------|
| ERV3-1     | 0.24700038 | 1.06E-25 |
| PRPF8      | 0.27501636 | 1.07E-25 |
| SEC23IP    | 0.17087817 | 1.14E-25 |
| ACY2       | 0.15960254 | 1.18E-25 |
| DERA       | 0.10257973 | 1.21E-25 |
| IP6K2      | -0.286738  | 1.32E-25 |
| POLR3H     | 0.12876592 | 1.34E-25 |
| CCM2       | -0.3043813 | 1.35E-25 |
| FAM207A    | 0.08412288 | 1.45E-25 |
| LAP3       | 0.14464657 | 1.51E-25 |
| PHF7       | 0.17599582 | 1.54E-25 |
| UGGT1      | 0.17261267 | 1.58E-25 |
| NDUFAF8    | 0.26103755 | 1.69E-25 |
| LNPK       | 0.16503997 | 1.71E-25 |
| AGTRAP     | 0.20011487 | 1.72E-25 |
| NOTCH2     | 0.19161022 | 1.74E-25 |
| MTOR       | 0.09489735 | 1.76E-25 |
| ARL6IP6    | 0.06712474 | 1.78E-25 |
| COA1       | 0.20084513 | 1.79E-25 |
| ATF1       | 0.12992406 | 1.83E-25 |
| IFRD2      | 0.15938805 | 1.85E-25 |
| ERLIN1     | 0.25924646 | 1.85E-25 |
| MCM3AP     | 0.19802909 | 1.91E-25 |
| PHACTR2    | 0.26666271 | 1.92E-25 |
| UTP18      | 0.17274651 | 1.92E-25 |
| NEDD9      | -0.3941597 | 1.92E-25 |
| ODC1       | -0.301421  | 2.04E-25 |
| ANAPC13    | 0.16488874 | 2.06E-25 |
| WIPI2      | -0.2163534 | 2.15E-25 |
| SCP2       | 0.3351521  | 2.22E-25 |
| EIF4EBP1   | 0.01531633 | 2.26E-25 |
| JOSD1      | -0.2269994 | 2.29E-25 |
| EBNA1BP2   | 0.22047883 | 2.30E-25 |
| PIGX       | 0.19719209 | 2.33E-25 |
| ZEB1       | -0.3817869 | 2.36E-25 |
| LINC00667  | 0.16971881 | 2.36E-25 |
| EBAG9      | 0.15059281 | 2.40E-25 |
| C6orf226   | -0.2662763 | 2.58E-25 |
| PRDM16     | 0.23250818 | 2.59E-25 |
| TRMT13     | 0.22628158 | 2.67E-25 |
| DHRX       | 0.12430861 | 2.67E-25 |
| ADAT2      | 0.14369239 | 2.84E-25 |
| SNRNP40    | 0.1253528  | 2.97E-25 |
| AC142472.1 | 0.15469071 | 3.04E-25 |
| TMEM168    | 0.18127699 | 3.11E-25 |
| ERAP1      | 0.15762097 | 3.13E-25 |
| ABHD14A    | 0.12222193 | 3.15E-25 |
| COX4I1     | -0.363456  | 3.26E-25 |
| MRPL57     | -0.4090102 | 3.32E-25 |
| POLR3GL    | 0.26333706 | 3.45E-25 |



|           |            |          |
|-----------|------------|----------|
| LARP1     | 0.32405545 | 3.49E-25 |
| NUDT16L1  | -0.2869501 | 3.55E-25 |
| DMTF1     | -0.2256145 | 3.67E-25 |
| GAS7      | -0.2979246 | 3.71E-25 |
| ZNF32     | 0.15299997 | 3.76E-25 |
| TSGA10    | 0.18197664 | 3.81E-25 |
| ARHGEF2   | -0.27632   | 3.84E-25 |
| GANAB     | 0.15896353 | 3.90E-25 |
| ANXA2     | -0.4344336 | 3.93E-25 |
| NGDN      | -0.028588  | 3.95E-25 |
| SCNM1     | -0.0339888 | 4.08E-25 |
| ZNF83     | 0.16342699 | 4.22E-25 |
| KIAA0100  | 0.20193736 | 4.30E-25 |
| SNHG20    | 0.18181041 | 4.32E-25 |
| MAN1A2    | 0.31339442 | 4.34E-25 |
| CLCN7     | 0.20658343 | 4.50E-25 |
| INPP5B    | 0.0507805  | 4.76E-25 |
| EXOSC8    | 0.15515095 | 4.96E-25 |
| RBIS      | 0.36694704 | 5.03E-25 |
| ALAD      | 0.13590258 | 5.16E-25 |
| C12orf45  | 0.30788435 | 5.30E-25 |
| HBP1      | -0.2811482 | 5.32E-25 |
| SREBF1    | -0.261431  | 5.35E-25 |
| SMC6      | 0.19033394 | 5.37E-25 |
| STRBP     | 0.2502546  | 5.45E-25 |
| DHRS4     | 0.1235995  | 5.46E-25 |
| MED10     | -0.276387  | 5.49E-25 |
| ILF3-DT   | 0.19046659 | 5.67E-25 |
| SUCLG2    | 0.16763259 | 5.87E-25 |
| RPL8      | -0.3297323 | 5.96E-25 |
| UBE3D     | 0.14585401 | 6.52E-25 |
| HNRNPUL2  | 0.21588526 | 6.56E-25 |
| RNF145    | -0.2353054 | 6.56E-25 |
| FBXW11    | -0.183737  | 6.63E-25 |
| NLN       | 0.16879102 | 6.64E-25 |
| RTCA-AS1  | 0.25365158 | 6.69E-25 |
| THAP5     | 0.22133055 | 6.89E-25 |
| PNPLA8    | -0.2704047 | 7.11E-25 |
| LINC01278 | 0.14273525 | 7.12E-25 |
| REPIN1    | -0.1941257 | 7.20E-25 |
| NDUFB3    | 0.27095477 | 7.21E-25 |
| ARFGAP3   | -0.3082867 | 7.23E-25 |
| ADGRE2    | -0.4104027 | 7.30E-25 |
| LIAS      | 0.1530208  | 7.34E-25 |
| MYL12A    | -0.373     | 7.35E-25 |
| TAF9      | -0.4629003 | 7.36E-25 |
| VPS33A    | 0.04203095 | 7.36E-25 |
| USP6NL    | -0.3712143 | 7.48E-25 |
| MAPKAPK2  | -0.2454257 | 7.59E-25 |
| TEX30     | -0.2725737 | 7.81E-25 |

|            |            |          |
|------------|------------|----------|
| CD68       | -0.3591056 | 8.39E-25 |
| FBXO25     | 0.16954278 | 8.40E-25 |
| BLOC1S5    | 0.1902547  | 8.94E-25 |
| CHCHD7     | 0.29873604 | 9.12E-25 |
| TMEM208    | -0.2280039 | 9.56E-25 |
| PSMD7      | -0.2778321 | 9.68E-25 |
| PML        | -0.1723306 | 9.74E-25 |
| YPEL2      | -0.2970527 | 9.77E-25 |
| PIGS       | 0.13033935 | 1.02E-24 |
| PDCD2      | 0.2624543  | 1.02E-24 |
| FBXO11     | -0.2437538 | 1.03E-24 |
| YRDC       | 0.14010104 | 1.05E-24 |
| SSR1       | 0.34309147 | 1.13E-24 |
| HDAC2      | 0.28419358 | 1.17E-24 |
| CDC123     | -0.2573966 | 1.19E-24 |
| EIF3B      | 0.23469343 | 1.20E-24 |
| GSK3B      | 0.16983727 | 1.21E-24 |
| HIST1H2BC  | -0.349951  | 1.22E-24 |
| PDCL3      | 0.17051241 | 1.23E-24 |
| SNHG32     | 0.41293842 | 1.27E-24 |
| ADD1       | -0.3348678 | 1.29E-24 |
| MKNK2      | -0.3401718 | 1.30E-24 |
| LINC01410  | 0.11419461 | 1.31E-24 |
| ZC3H4      | 0.19137273 | 1.35E-24 |
| PIGBOS1    | 0.20021163 | 1.38E-24 |
| DIPK2A     | 0.13392104 | 1.42E-24 |
| LARP4      | 0.16798762 | 1.45E-24 |
| CBWD1      | 0.15037086 | 1.49E-24 |
| IRF9       | -0.2638109 | 1.50E-24 |
| HIBCH      | 0.12610746 | 1.50E-24 |
| INSR       | 0.15910853 | 1.55E-24 |
| AC015813.1 | 0.17914111 | 1.55E-24 |
| ARID3A     | -0.3490397 | 1.63E-24 |
| NDUFAF4    | 0.11723868 | 1.63E-24 |
| MAN2B2     | 0.1453692  | 1.68E-24 |
| TCOF1      | 0.21041009 | 1.73E-24 |
| CTSC       | 0.41232767 | 1.73E-24 |
| MNS1       | -0.3101884 | 1.75E-24 |
| ARRB2      | -0.3330224 | 1.77E-24 |
| AAMP       | 0.04005911 | 1.79E-24 |
| STK11      | 0.09458564 | 1.85E-24 |
| SRP14-AS1  | 0.1391694  | 1.88E-24 |
| MSRB3      | 0.32726659 | 1.88E-24 |
| SMIM20     | 0.14418381 | 1.90E-24 |
| CPT1A      | 0.30238983 | 1.92E-24 |
| DLST       | -0.1556169 | 2.05E-24 |
| FBL        | 0.33183045 | 2.09E-24 |
| B3GALNT2   | 0.14940018 | 2.14E-24 |
| BMS1       | 0.18071641 | 2.16E-24 |
| NUDT7      | 0.10686133 | 2.21E-24 |

|            |            |          |
|------------|------------|----------|
| BRIX1      | 0.1523754  | 2.21E-24 |
| ELP3       | 0.08645615 | 2.24E-24 |
| ZMYND11    | 0.17820499 | 2.26E-24 |
| PSMD9      | -0.1152654 | 2.30E-24 |
| MBD4       | 0.28898323 | 2.32E-24 |
| TANK       | -0.3103029 | 2.37E-24 |
| CCDC91     | 0.19605256 | 2.52E-24 |
| RNF20      | 0.19905199 | 2.54E-24 |
| SS18L2     | 0.06647949 | 2.64E-24 |
| CYLD       | -0.3280029 | 2.65E-24 |
| ATXN7L1    | 0.13689927 | 2.68E-24 |
| FLT3       | 0.51331079 | 2.76E-24 |
| IVD        | 0.20671867 | 2.77E-24 |
| MRPL19     | 0.1922484  | 2.79E-24 |
| AC004918.1 | 0.09214825 | 2.82E-24 |
| PSMD11     | -0.2210862 | 2.84E-24 |
| ARID1B     | 0.43455957 | 2.85E-24 |
| SNHG4      | 0.20714443 | 2.86E-24 |
| SSBP4      | -0.2217003 | 2.87E-24 |
| SNRPC      | -0.1058177 | 2.89E-24 |
| CHMP6      | -0.226852  | 3.04E-24 |
| TRIM27     | 0.22184178 | 3.13E-24 |
| CD46       | 0.34863864 | 3.25E-24 |
| DUSP1      | -0.5791203 | 3.38E-24 |
| MRE11      | 0.25157657 | 3.43E-24 |
| DHX37      | 0.16413676 | 3.51E-24 |
| NAB2       | -0.2536502 | 3.54E-24 |
| LINC02245  | 0.12803876 | 3.57E-24 |
| CUTC       | 0.09703205 | 3.64E-24 |
| ICE2       | 0.19654157 | 3.74E-24 |
| POLR2G     | 0.18083596 | 3.86E-24 |
| DOK3       | 0.14555561 | 3.97E-24 |
| CDC34      | -0.1338445 | 4.10E-24 |
| CEP44      | 0.14638693 | 4.13E-24 |
| MKKS       | 0.17075523 | 4.14E-24 |
| EWSR1      | -0.3066314 | 4.15E-24 |
| DYNC1LI1   | -0.2687406 | 4.16E-24 |
| ACBD3      | -0.3406646 | 4.45E-24 |
| TMEM41B    | -0.179296  | 4.53E-24 |
| TP53BP2    | -0.2926484 | 4.73E-24 |
| RNMT       | -0.2861271 | 4.74E-24 |
| ATP5PD     | 0.3695989  | 4.78E-24 |
| MLH3       | 0.21202481 | 4.79E-24 |
| SPAG7      | -0.1800468 | 4.83E-24 |
| ZNF514     | 0.11307103 | 4.85E-24 |
| RPP40      | 0.10131002 | 4.85E-24 |
| SIVA1      | -0.1420813 | 4.87E-24 |
| ABTB1      | 0.10526923 | 4.95E-24 |
| TAS2R14    | 0.10286945 | 5.07E-24 |
| TVP23B     | 0.08399509 | 5.11E-24 |

|            |            |          |
|------------|------------|----------|
| BLVRB      | 0.264667   | 5.23E-24 |
| SH3KBP1    | 0.39044536 | 5.36E-24 |
| LINC01089  | 0.08875565 | 5.43E-24 |
| APMAP      | 0.12413722 | 5.59E-24 |
| COQ8A      | 0.14648732 | 5.69E-24 |
| CUL1       | 0.15341837 | 5.89E-24 |
| SLC38A10   | 0.20520551 | 5.97E-24 |
| ISG15      | -0.3152387 | 6.12E-24 |
| TOPBP1     | 0.2057664  | 6.22E-24 |
| SLC36A4    | 0.17055423 | 6.29E-24 |
| CHPT1      | 0.18466981 | 6.40E-24 |
| RBM39      | -0.4265455 | 6.61E-24 |
| UBR2       | 0.09366971 | 6.67E-24 |
| SULT1A1    | 0.15967091 | 6.69E-24 |
| RAD51C     | 0.06263608 | 6.86E-24 |
| GLYR1      | 0.24602762 | 7.04E-24 |
| RANGRF     | 0.13752904 | 7.11E-24 |
| SOS2       | 0.23323269 | 7.35E-24 |
| DYNC1I2    | 0.28155723 | 7.35E-24 |
| ZNHIT6     | 0.28673323 | 7.47E-24 |
| ZNF609     | 0.22878251 | 7.77E-24 |
| CCDC125    | 0.22984393 | 7.78E-24 |
| EHBP1L1    | -0.2963025 | 7.78E-24 |
| NFKBIL1    | 0.0453498  | 7.79E-24 |
| ARL17B     | 0.08963017 | 7.87E-24 |
| TMUB2      | -0.1779235 | 7.99E-24 |
| TMEM150A   | 0.10524732 | 8.01E-24 |
| SLC39A6    | 0.14910162 | 8.09E-24 |
| UBA2       | 0.18035263 | 8.18E-24 |
| ACADSB     | 0.14540235 | 8.22E-24 |
| NSFL1C     | -0.179474  | 8.29E-24 |
| PRMT5      | 0.14684357 | 8.60E-24 |
| MRPL1      | 0.18236073 | 8.67E-24 |
| TRPV2      | -0.1916616 | 9.10E-24 |
| FOSL2      | -0.4201222 | 9.33E-24 |
| TMEM35B    | 0.19525855 | 9.61E-24 |
| GBGT1      | 0.11877746 | 9.69E-24 |
| PAXIP1-AS2 | 0.13705419 | 1.01E-23 |
| UBE2M      | 0.18484366 | 1.02E-23 |
| JMJD6      | -0.1428812 | 1.05E-23 |
| SKIDA1     | 0.19843522 | 1.06E-23 |
| ANAPC5     | 0.37237488 | 1.07E-23 |
| NR6A1      | 0.16688783 | 1.09E-23 |
| CYB561D2   | 0.10267275 | 1.12E-23 |
| FAM98B     | 0.11872694 | 1.15E-23 |
| MCM5       | -0.118994  | 1.21E-23 |
| NDUFA3     | 0.35593124 | 1.22E-23 |
| ANKRD10-IT | 0.16817958 | 1.23E-23 |
| CCDC18     | 0.1764958  | 1.29E-23 |
| FAM160B1   | -0.1474962 | 1.29E-23 |

|            |            |          |
|------------|------------|----------|
| VPS51      | -0.0862983 | 1.30E-23 |
| NFXL1      | 0.12522806 | 1.30E-23 |
| AC010642.2 | 0.10699939 | 1.32E-23 |
| AC090630.1 | 0.14901012 | 1.33E-23 |
| MED30      | 0.03855029 | 1.36E-23 |
| VWA5A      | 0.17234939 | 1.39E-23 |
| ZNF69      | 0.14450457 | 1.39E-23 |
| CMIP       | 0.20987721 | 1.44E-23 |
| RABIF      | -0.2277141 | 1.45E-23 |
| SNRPA1     | -0.2489403 | 1.49E-23 |
| IDI1       | -0.3469948 | 1.50E-23 |
| TSPAN3     | 0.23544082 | 1.50E-23 |
| MNAT1      | 0.11861773 | 1.56E-23 |
| TP53I13    | -0.1820718 | 1.57E-23 |
| TMED3      | 0.17702439 | 1.60E-23 |
| CAD        | 0.14745426 | 1.63E-23 |
| CAMTA1     | -0.2268994 | 1.66E-23 |
| SGTA       | -0.2603048 | 1.68E-23 |
| RAB7B      | 0.19026113 | 1.68E-23 |
| SURF6      | 0.16691227 | 1.72E-23 |
| NHLRC3     | 0.1396925  | 1.79E-23 |
| ZBTB8OS    | 0.13082022 | 1.81E-23 |
| RPUSD3     | 0.14441151 | 1.86E-23 |
| CHMP1A     | -0.1644501 | 1.86E-23 |
| CFAP20     | -0.1913999 | 1.92E-23 |
| KLF2       | -0.4368644 | 2.05E-23 |
| SUMO1      | -0.2551113 | 2.06E-23 |
| CNOT6      | 0.12146291 | 2.09E-23 |
| MSH3       | 0.22601874 | 2.12E-23 |
| AL157392.3 | 0.12504205 | 2.12E-23 |
| RTN3       | 0.32316288 | 2.15E-23 |
| HACD3      | 0.15395367 | 2.16E-23 |
| PDE4DIP    | 0.18344377 | 2.18E-23 |
| NFYC       | 0.0634133  | 2.19E-23 |
| AC104530.1 | 0.18062539 | 2.24E-23 |
| ARID4A     | -0.3925024 | 2.29E-23 |
| JKAMP      | 0.20555025 | 2.41E-23 |
| SLC46A3    | 0.13185564 | 2.43E-23 |
| CACYBP     | 0.28716456 | 2.44E-23 |
| GLT8D1     | 0.11506356 | 2.67E-23 |
| CNTRL      | 0.34565754 | 2.73E-23 |
| DTYMK      | 0.12608947 | 2.75E-23 |
| CCDC149    | 0.16434849 | 2.77E-23 |
| LSM6       | 0.13528277 | 2.80E-23 |
| RPS24      | 0.21629608 | 2.94E-23 |
| PPP1R35    | -0.2004975 | 2.96E-23 |
| UBA1       | 0.12479116 | 3.01E-23 |
| LINC00623  | 0.13771102 | 3.05E-23 |
| UNG        | 0.06521848 | 3.07E-23 |
| ERH        | 0.32007425 | 3.19E-23 |

|            |            |          |
|------------|------------|----------|
| GNPTG      | 0.20375574 | 3.25E-23 |
| TESC       | 0.30871963 | 3.40E-23 |
| SAR1A      | -0.207081  | 3.42E-23 |
| VPS11      | 0.10170898 | 3.47E-23 |
| GTF2H3     | 0.14059003 | 3.48E-23 |
| UBE2F      | 0.27160088 | 3.50E-23 |
| GARS       | -0.2637057 | 3.55E-23 |
| PMF1       | -0.2362399 | 3.55E-23 |
| DHFR       | 0.01078737 | 3.61E-23 |
| FBXL3      | -0.2696633 | 3.67E-23 |
| NOG        | 0.15392018 | 3.70E-23 |
| METRNL     | -0.2999763 | 3.74E-23 |
| RPA3       | -0.0068413 | 3.75E-23 |
| UXS1       | 0.15426998 | 3.77E-23 |
| CCDC14     | 0.25150092 | 3.89E-23 |
| ITFG1      | 0.1125952  | 3.89E-23 |
| GSAP       | 0.11285109 | 3.96E-23 |
| DDA1       | -0.1721253 | 4.00E-23 |
| FARSA      | 0.28538465 | 4.01E-23 |
| SLIRP      | 0.27204139 | 4.01E-23 |
| ZXDC       | 0.1091913  | 4.10E-23 |
| PDHA1      | 0.11892929 | 4.12E-23 |
| C17orf67   | 0.18699435 | 4.16E-23 |
| TIMP2      | 0.21218779 | 4.22E-23 |
| SQOR       | 0.2766006  | 4.27E-23 |
| RBL2       | 0.18738566 | 4.38E-23 |
| CHCHD3     | 0.13226091 | 4.48E-23 |
| HMGB2      | -0.3950338 | 4.51E-23 |
| SMIM29     | -0.1533403 | 4.55E-23 |
| PIIP5K2    | 0.3071251  | 4.57E-23 |
| ZNF433-AS1 | 0.20660741 | 4.59E-23 |
| SNRNP27    | 0.18592511 | 4.64E-23 |
| AC007566.1 | 0.12118867 | 4.65E-23 |
| ITGAX      | -0.3127187 | 4.68E-23 |
| NAPEPLD    | 0.16695622 | 4.92E-23 |
| PRPF19     | 0.04083862 | 5.10E-23 |
| FTH1       | -0.4447276 | 5.11E-23 |
| EEF1E1     | 0.18750385 | 5.24E-23 |
| MEF2C      | -0.4976114 | 5.27E-23 |
| TUBA1C     | -0.278717  | 5.43E-23 |
| ITFG2      | 0.129853   | 5.46E-23 |
| SESN1      | -0.2510622 | 5.47E-23 |
| ANAPC16    | 0.26410212 | 5.49E-23 |
| SMAP2      | -0.2923134 | 5.61E-23 |
| OSGEP      | -0.122676  | 5.75E-23 |
| EEF1AKMT1  | 0.12580101 | 5.78E-23 |
| LYPLA2     | -0.1176565 | 5.84E-23 |
| RBM4       | -0.2752564 | 5.88E-23 |
| API5       | 0.13188903 | 5.89E-23 |
| UBA6       | -0.2590357 | 5.95E-23 |

|            |            |          |
|------------|------------|----------|
| DPY30      | 0.14239334 | 6.02E-23 |
| STK24      | -0.3093684 | 6.08E-23 |
| GNL1       | -0.2514515 | 6.08E-23 |
| HEBP2      | -0.295338  | 6.22E-23 |
| ARMC1      | 0.11019015 | 6.35E-23 |
| CTDSPL2    | -0.0708106 | 6.35E-23 |
| AC009061.2 | 0.11592479 | 6.56E-23 |
| PDCD5      | 0.29387515 | 6.74E-23 |
| PLPBP      | 0.14421412 | 6.83E-23 |
| PUS7       | 0.16774924 | 7.16E-23 |
| LATS2      | -0.3238896 | 7.29E-23 |
| ALYREF     | 0.15176113 | 7.50E-23 |
| PCNX4      | 0.34606713 | 7.66E-23 |
| PKD2       | 0.21090979 | 7.69E-23 |
| MRPL39     | -0.1233388 | 7.72E-23 |
| KDM5C      | -0.0277981 | 7.75E-23 |
| FAM32A     | 0.03197545 | 7.86E-23 |
| ICAM1      | -0.2673737 | 7.89E-23 |
| N4BP1      | -0.2688434 | 8.47E-23 |
| CBWD2      | 0.14417675 | 8.66E-23 |
| RBM6       | 0.1862261  | 8.66E-23 |
| PSMC5      | -0.0808497 | 8.69E-23 |
| PRELID3B   | -0.0876709 | 8.80E-23 |
| HMGCL      | 0.05066793 | 8.80E-23 |
| POLI       | 0.10329538 | 8.92E-23 |
| QPRT       | 0.39918818 | 9.37E-23 |
| PITHD1     | -0.1157225 | 9.42E-23 |
| GAB3       | 0.05454866 | 9.45E-23 |
| MON1B      | 0.14177865 | 9.57E-23 |
| BTN3A2     | 0.15335006 | 9.59E-23 |
| FBH1       | 0.11463531 | 9.65E-23 |
| DHX8       | -0.0071585 | 9.68E-23 |
| MRPS22     | -0.2241185 | 9.72E-23 |
| PAAF1      | 0.20065903 | 9.76E-23 |
| TIMM17A    | -0.2016424 | 9.78E-23 |
| TSPO       | -0.364696  | 9.81E-23 |
| DNAJC10    | 0.35572545 | 9.93E-23 |
| ARHGEF7    | -0.3250664 | 9.98E-23 |
| PIGK       | 0.14188171 | 1.01E-22 |
| TMC6       | -0.2899753 | 1.02E-22 |
| PIK3C3     | 0.26134668 | 1.03E-22 |
| MAP1LC3A   | -0.2671704 | 1.03E-22 |
| PDCD6      | 0.32214854 | 1.03E-22 |
| TRAPPC3    | 0.15193314 | 1.04E-22 |
| CPSF7      | -0.1592396 | 1.06E-22 |
| NISCH      | 0.10501497 | 1.15E-22 |
| ERG28      | 0.02518303 | 1.16E-22 |
| RMND1      | 0.15717406 | 1.17E-22 |
| PRKCQ      | 0.09204326 | 1.17E-22 |
| LRRC28     | 0.09024035 | 1.17E-22 |

|            |            |          |
|------------|------------|----------|
| AC026124.1 | 0.15127181 | 1.18E-22 |
| RPP21      | 0.12624843 | 1.19E-22 |
| CBX4       | 0.06504144 | 1.20E-22 |
| PSMB7      | -0.1521052 | 1.22E-22 |
| RBPMS      | -0.2858719 | 1.22E-22 |
| FCF1       | 0.14026053 | 1.24E-22 |
| FOS        | -0.6056705 | 1.30E-22 |
| TDRD3      | 0.15392838 | 1.37E-22 |
| TIMM17B    | -0.0104146 | 1.41E-22 |
| PSMB2      | -0.2195563 | 1.42E-22 |
| KLHDC3     | 0.08094776 | 1.47E-22 |
| BAZ2A      | -0.2810468 | 1.51E-22 |
| XRRA1      | 0.13717805 | 1.52E-22 |
| SMARCC1    | 0.40646971 | 1.54E-22 |
| ZNF276     | -0.2431609 | 1.57E-22 |
| CD244      | 0.12585747 | 1.59E-22 |
| SAMM50     | 0.05059361 | 1.60E-22 |
| B3GNTL1    | 0.16260994 | 1.60E-22 |
| GCLC       | 0.16852522 | 1.63E-22 |
| C1orf50    | -0.1148676 | 1.64E-22 |
| PPP1R10    | 0.19080654 | 1.64E-22 |
| SHPRH      | 0.18281685 | 1.64E-22 |
| RAB11A     | -0.1646349 | 1.64E-22 |
| FAM49B     | -0.3003519 | 1.65E-22 |
| KRT18      | -0.4796737 | 1.65E-22 |
| SPIDR      | 0.18527018 | 1.66E-22 |
| POLR3A     | 0.11675252 | 1.79E-22 |
| GLO1       | 0.19338996 | 1.79E-22 |
| HILPDA     | 0.11265662 | 1.80E-22 |
| APOOL      | 0.14543436 | 1.85E-22 |
| ZNF790-AS1 | 0.12083673 | 1.88E-22 |
| DPH7       | 0.12098976 | 2.00E-22 |
| UBE2D3     | -0.3533047 | 2.02E-22 |
| PHF5A      | 0.06429132 | 2.04E-22 |
| TMEM126B   | 0.21828264 | 2.05E-22 |
| TPRKB      | 0.1410728  | 2.06E-22 |
| DARS       | 0.31236279 | 2.07E-22 |
| LASP1      | -0.2322283 | 2.08E-22 |
| NEU4       | -0.24255   | 2.12E-22 |
| ZC3H6      | 0.19888393 | 2.18E-22 |
| EEF2K      | 0.07892121 | 2.19E-22 |
| ZNF664     | 0.12741181 | 2.21E-22 |
| WDR61      | 0.22741236 | 2.24E-22 |
| TFAM       | -0.3266154 | 2.27E-22 |
| PRR11      | 0.1590856  | 2.28E-22 |
| EMC2       | 0.15462711 | 2.28E-22 |
| PLAUR      | -0.3534428 | 2.28E-22 |
| PCMTD1     | 0.25944285 | 2.32E-22 |
| GNA13      | -0.245019  | 2.33E-22 |
| MACF1      | 0.433657   | 2.34E-22 |



|            |            |          |
|------------|------------|----------|
| MYBBP1A    | 0.12642333 | 2.36E-22 |
| GMPR       | 0.20659203 | 2.40E-22 |
| ROCK2      | 0.2813396  | 2.50E-22 |
| ARSD       | 0.28188902 | 2.51E-22 |
| CHID1      | 0.01405954 | 2.52E-22 |
| F8A3       | 0.13114383 | 2.54E-22 |
| DPM2       | 0.09843596 | 2.54E-22 |
| KDM2A      | -0.1783169 | 2.57E-22 |
| NUP43      | 0.09690802 | 2.57E-22 |
| NT5M       | 0.14913045 | 2.59E-22 |
| AC006480.2 | 0.11877208 | 2.60E-22 |
| YARS       | 0.03135156 | 2.66E-22 |
| TGIF2      | -0.2165386 | 2.66E-22 |
| PYM1       | -0.2244312 | 2.67E-22 |
| RNF213     | 0.19672347 | 2.70E-22 |
| PRKAG2     | 0.10020878 | 2.73E-22 |
| IGFBP2     | 0.44646952 | 2.75E-22 |
| NUP153     | -0.0993949 | 2.79E-22 |
| TRIP11     | 0.30615636 | 2.79E-22 |
| TMEM218    | 0.21214722 | 2.82E-22 |
| TUT7       | 0.19636384 | 2.86E-22 |
| KPNA2      | -0.1480509 | 2.90E-22 |
| ZNF429     | 0.18019246 | 2.97E-22 |
| FAM106A    | 0.06758413 | 3.07E-22 |
| ST3GAL1    | -0.2988476 | 3.10E-22 |
| RUNX1      | 0.35930107 | 3.15E-22 |
| ELOC       | -0.1656151 | 3.22E-22 |
| FUT10      | 0.05884309 | 3.23E-22 |
| ECM1       | -0.1923731 | 3.33E-22 |
| RFLNB      | 0.39675266 | 3.33E-22 |
| STAT2      | 0.21451538 | 3.34E-22 |
| ZNFX1      | -0.2808825 | 3.43E-22 |
| LMO7       | 0.13219134 | 3.49E-22 |
| ZNF518A    | 0.22660072 | 3.50E-22 |
| PLBD2      | 0.07457198 | 3.57E-22 |
| EMG1       | -0.119765  | 3.62E-22 |
| CIZ1       | 0.12379091 | 3.64E-22 |
| RFX2       | -0.2891605 | 3.70E-22 |
| IMMP1L     | 0.1272376  | 3.71E-22 |
| ZC3H7B     | 0.12535367 | 3.71E-22 |
| ZNF714     | 0.1452296  | 3.84E-22 |
| ZMYND19    | 0.10438777 | 3.96E-22 |
| AFG3L2     | 0.18496512 | 4.03E-22 |
| ZYX        | -0.3193021 | 4.11E-22 |
| RRAGA      | -0.1567269 | 4.14E-22 |
| CHST13     | 0.11960443 | 4.16E-22 |
| GTF2H5     | 0.19559296 | 4.20E-22 |
| G6PD       | -0.2309914 | 4.27E-22 |
| THAP6      | 0.10737114 | 4.27E-22 |
| HNRNPAB    | 0.38088085 | 4.27E-22 |

|         |            |          |
|---------|------------|----------|
| HEATR3  | 0.10904095 | 4.32E-22 |
| LRRRC59 | -0.1707486 | 4.34E-22 |
| NOMO1   | 0.08410639 | 4.36E-22 |
| ITGAE   | 0.2723992  | 4.39E-22 |
| HMOX2   | -0.1094048 | 4.41E-22 |
| SDHAF2  | -0.1918064 | 4.49E-22 |
| SEC13   | -0.0059498 | 4.51E-22 |
| SMIM7   | 0.05361325 | 4.61E-22 |
| CSF3R   | 0.43246885 | 4.66E-22 |
| KDELR2  | -0.1531186 | 4.68E-22 |
| SDK2    | 0.08445554 | 4.86E-22 |
| YIPF3   | -0.1359299 | 4.93E-22 |
| NUMB    | -0.1891051 | 4.95E-22 |
| TRMT10C | 0.32275609 | 5.02E-22 |
| XPC     | 0.18158191 | 5.06E-22 |
| DOK1    | -0.1719708 | 5.10E-22 |
| LYSMD2  | 0.16553646 | 5.17E-22 |
| TCF12   | 0.07675161 | 5.21E-22 |
| DGLUCY  | 0.23174768 | 5.33E-22 |
| ALDH6A1 | 0.14194795 | 5.35E-22 |
| CMC1    | 0.17456702 | 5.62E-22 |
| VEZT    | -0.2343091 | 5.67E-22 |
| ZNF529  | 0.11164469 | 5.79E-22 |
| KCNMB3  | 0.10572743 | 6.28E-22 |
| EXTL2   | 0.14518801 | 6.53E-22 |
| HAUS1   | 0.13072606 | 6.66E-22 |
| SARS    | 0.16715838 | 6.73E-22 |
| CTSW    | -0.3955029 | 6.73E-22 |
| NDUFAF6 | 0.16363773 | 6.80E-22 |
| MOSPD2  | 0.11187001 | 6.95E-22 |
| SLC16A7 | 0.19034754 | 7.03E-22 |
| TLR2    | 0.18386458 | 7.09E-22 |
| GPR174  | 0.19808974 | 7.19E-22 |
| MAP7    | 0.35448486 | 7.22E-22 |
| CDCA7L  | 0.15825492 | 7.23E-22 |
| MTA2    | 0.02025959 | 7.26E-22 |
| NUP107  | 0.15476433 | 7.40E-22 |
| CGGBP1  | 0.24575225 | 7.41E-22 |
| HDAC7   | -0.1769857 | 7.76E-22 |
| F11R    | -0.3078638 | 7.92E-22 |
| HEBP1   | 0.19179433 | 8.06E-22 |
| LIX1L   | 0.11883543 | 8.06E-22 |
| MRPL47  | -0.1925098 | 8.06E-22 |
| NSMAF   | 0.14039582 | 8.12E-22 |
| RAD17   | 0.15085537 | 8.35E-22 |
| CNOT11  | 0.07368387 | 8.46E-22 |
| ELMO1   | -0.2630366 | 8.76E-22 |
| BZW2    | 0.2959525  | 8.80E-22 |
| LYAR    | 0.17323712 | 9.03E-22 |
| TCEA2   | -0.2559969 | 9.06E-22 |

|            |            |          |
|------------|------------|----------|
| HADH       | 0.13705956 | 9.19E-22 |
| NAA50      | -0.1782235 | 9.21E-22 |
| MXI1       | 0.14665834 | 9.39E-22 |
| CDKN1B     | 0.03753593 | 9.51E-22 |
| DNAJC19    | 0.21682228 | 9.51E-22 |
| MBD2       | 0.11276057 | 9.55E-22 |
| SCAMP3     | 0.13664881 | 9.55E-22 |
| RPP25L     | 0.11259469 | 9.68E-22 |
| NARF       | 0.10082446 | 9.76E-22 |
| CEP152     | 0.17276996 | 9.80E-22 |
| TMEM41A    | 0.12682531 | 9.88E-22 |
| ZC3H15     | -0.3775468 | 9.93E-22 |
| PFN1       | -0.4545221 | 9.99E-22 |
| XPNPEP3    | 0.09990353 | 1.05E-21 |
| GLRX       | -0.1301879 | 1.05E-21 |
| ZNF652     | 0.15280221 | 1.09E-21 |
| AP002748.4 | 0.07309481 | 1.09E-21 |
| MFN1       | 0.09284482 | 1.11E-21 |
| SHFL       | -0.2206199 | 1.11E-21 |
| NRAS       | -0.2195358 | 1.11E-21 |
| FMNL3      | 0.10054352 | 1.12E-21 |
| TSEN2      | 0.12891419 | 1.12E-21 |
| KIDINS220  | 0.13856229 | 1.14E-21 |
| TRIM44     | 0.26576621 | 1.18E-21 |
| GOSR1      | -0.1639631 | 1.20E-21 |
| ZNF785     | 0.17517207 | 1.20E-21 |
| C2CD2      | 0.08682272 | 1.22E-21 |
| HSPB11     | 0.10338493 | 1.27E-21 |
| KAT7       | 0.10505045 | 1.32E-21 |
| MRPL11     | -0.0253093 | 1.34E-21 |
| NDUFAF3    | -0.0503098 | 1.34E-21 |
| PSMA5      | 0.24680187 | 1.36E-21 |
| ZNF181     | 0.12461986 | 1.37E-21 |
| HYPK       | 0.09343755 | 1.37E-21 |
| RASA4      | 0.11033725 | 1.37E-21 |
| LTN1       | 0.18529515 | 1.38E-21 |
| TMED10     | -0.229669  | 1.38E-21 |
| COL24A1    | 0.2436248  | 1.39E-21 |
| KDM4A      | 0.20849547 | 1.39E-21 |
| AL138756.1 | 0.13004712 | 1.39E-21 |
| HOXB2      | -0.3278537 | 1.41E-21 |
| SLCO3A1    | 0.14196587 | 1.42E-21 |
| GSPT2      | 0.16027079 | 1.43E-21 |
| ING1       | 0.0379008  | 1.44E-21 |
| ELMOD2     | 0.131175   | 1.45E-21 |
| MRPL22     | -0.1800743 | 1.52E-21 |
| INTS6      | -0.3701456 | 1.53E-21 |
| MRPL50     | 0.11791001 | 1.54E-21 |
| WDR41      | 0.00146593 | 1.54E-21 |
| NUDCD3     | 0.12319491 | 1.55E-21 |

|            |            |          |
|------------|------------|----------|
| ALDH5A1    | 0.14315623 | 1.59E-21 |
| ITGB1BP1   | -0.1695358 | 1.59E-21 |
| GPR108     | 0.06287469 | 1.61E-21 |
| TTN-AS1    | 0.20146754 | 1.63E-21 |
| NOC3L      | 0.24540415 | 1.65E-21 |
| SMIM10L1   | 0.15460625 | 1.67E-21 |
| SDHAF1     | 0.12854836 | 1.70E-21 |
| DPPA4      | 0.29391763 | 1.71E-21 |
| IFIH1      | 0.18851268 | 1.72E-21 |
| ORC3       | 0.10214875 | 1.73E-21 |
| PSMC4      | -0.1356128 | 1.80E-21 |
| ATG3       | -0.2002368 | 1.81E-21 |
| COG3       | -0.2433897 | 1.83E-21 |
| NAXE       | 0.12932352 | 1.88E-21 |
| AL390728.6 | 0.16698824 | 1.91E-21 |
| NDUFA8     | 0.13516337 | 1.91E-21 |
| FUOM       | -0.2207648 | 1.96E-21 |
| UNC50      | 0.10438453 | 1.97E-21 |
| DTX3L      | 0.14615295 | 1.98E-21 |
| AHDC1      | -0.3338153 | 1.99E-21 |
| IRAK1      | 0.01596535 | 2.00E-21 |
| DPF2       | -0.0757249 | 2.03E-21 |
| GLOD4      | 0.21100748 | 2.04E-21 |
| UBAC2      | 0.05285023 | 2.12E-21 |
| PPP1R12B   | 0.15848772 | 2.12E-21 |
| CMBL       | 0.17788259 | 2.13E-21 |
| C16orf58   | 0.05387277 | 2.14E-21 |
| ACLY       | 0.1775366  | 2.15E-21 |
| FRG1       | 0.33115543 | 2.16E-21 |
| COMMD4     | 0.1287278  | 2.17E-21 |
| UBALD2     | -0.1932867 | 2.21E-21 |
| FAN1       | 0.08207007 | 2.24E-21 |
| ELAC2      | 0.07592457 | 2.24E-21 |
| LINC01184  | 0.1373629  | 2.29E-21 |
| KLHL18     | -0.2523813 | 2.29E-21 |
| ANKRD13D   | -0.1610486 | 2.30E-21 |
| HPRT1      | -0.1557966 | 2.34E-21 |
| ZNF224     | 0.03875749 | 2.36E-21 |
| PPP1R21    | 0.14111741 | 2.38E-21 |
| RNPEPL1    | 0.02928339 | 2.41E-21 |
| C1orf174   | 0.0810125  | 2.43E-21 |
| TMEM30A    | 0.11513957 | 2.46E-21 |
| DCTPP1     | 0.0953315  | 2.50E-21 |
| GPAT3      | -0.3351894 | 2.56E-21 |
| RAB2A      | -0.3083416 | 2.59E-21 |
| POLG2      | 0.10185933 | 2.68E-21 |
| UBQLN1     | -0.1941381 | 2.73E-21 |
| THRA       | 0.05689324 | 2.78E-21 |
| NME1       | 0.29096998 | 2.79E-21 |
| BFAR       | -0.1904729 | 2.84E-21 |

|            |            |          |
|------------|------------|----------|
| UMPS       | 0.02033302 | 2.86E-21 |
| CYBRD1     | 0.11440444 | 2.86E-21 |
| RBM8A      | -0.3243903 | 2.88E-21 |
| ZNRF2      | 0.09674686 | 2.93E-21 |
| INTS11     | -0.0392431 | 2.95E-21 |
| GOLT1B     | -0.0835071 | 2.99E-21 |
| MRPS2      | 0.02681244 | 3.03E-21 |
| METTL8     | 0.17034986 | 3.11E-21 |
| NIPAL2     | 0.13852054 | 3.14E-21 |
| AP3S1      | -0.2002183 | 3.19E-21 |
| AC097448.1 | 0.10492931 | 3.28E-21 |
| TIMM9      | 0.2255444  | 3.30E-21 |
| ERI2       | 0.12049093 | 3.30E-21 |
| NEDD8      | 0.28045021 | 3.30E-21 |
| CBWD5      | 0.15797631 | 3.34E-21 |
| PPP4R1     | -0.2305361 | 3.41E-21 |
| ARRDC1     | -0.0114279 | 3.46E-21 |
| PPM1K      | 0.23890902 | 3.49E-21 |
| MLEC       | 0.29132748 | 3.51E-21 |
| RIDA       | 0.12700854 | 3.53E-21 |
| RFC4       | 0.04620582 | 3.56E-21 |
| LONP2      | 0.1630158  | 3.57E-21 |
| RPGR       | -0.3653573 | 3.57E-21 |
| ADSS       | 0.1785548  | 3.57E-21 |
| EEF1D      | -0.282698  | 3.61E-21 |
| SNTB1      | 0.12282211 | 3.62E-21 |
| NCK1       | -0.2059905 | 3.64E-21 |
| TNRC6B     | 0.3222898  | 3.64E-21 |
| FAM89B     | -0.1104839 | 3.65E-21 |
| SNRNP200   | 0.22263147 | 3.67E-21 |
| ZNF37A     | 0.23428479 | 3.73E-21 |
| GAS6-AS1   | 0.18784062 | 3.74E-21 |
| TMEM248    | -0.0048154 | 3.77E-21 |
| GET1       | -0.1444614 | 3.88E-21 |
| TECR       | 0.03129803 | 3.89E-21 |
| XXYLT1     | 0.10985448 | 3.92E-21 |
| MCFD2      | -0.2112815 | 3.99E-21 |
| AC010883.3 | 0.13701424 | 3.99E-21 |
| HMG20B     | 0.04207584 | 4.00E-21 |
| NAGK       | -0.0392446 | 4.03E-21 |
| TRAPPC11   | 0.17198979 | 4.09E-21 |
| EVI5       | 0.17728293 | 4.12E-21 |
| GRAMD1A    | -0.153612  | 4.19E-21 |
| PHF6       | 0.20023225 | 4.21E-21 |
| RNF13      | 0.149369   | 4.22E-21 |
| GNL2       | 0.08325359 | 4.27E-21 |
| ATP6V1B2   | -0.1858346 | 4.28E-21 |
| GIGYF2     | 0.11685194 | 4.37E-21 |
| EIF4EBP2   | 0.17641023 | 4.39E-21 |
| CEP57      | 0.19183547 | 4.46E-21 |

|            |            |          |
|------------|------------|----------|
| POLR2C     | 0.01284641 | 4.47E-21 |
| ARPC5      | 0.22657403 | 4.52E-21 |
| CEBPZOS    | 0.17154733 | 4.65E-21 |
| TMEM209    | 0.12118368 | 4.67E-21 |
| UHMK1      | 0.21363031 | 4.83E-21 |
| AC004540.2 | 0.24587994 | 4.87E-21 |
| LIG3       | 0.1323323  | 4.93E-21 |
| PPP6R3     | -0.2444663 | 4.96E-21 |
| STX8       | 0.10673641 | 4.98E-21 |
| PPP6R2     | 0.10185873 | 5.07E-21 |
| MFSD3      | 0.10616554 | 5.20E-21 |
| RCC2       | 0.1865898  | 5.33E-21 |
| SUSD1      | 0.16000536 | 5.34E-21 |
| SP1        | 0.1397442  | 5.37E-21 |
| CD34       | -0.2039321 | 5.44E-21 |
| KDM1A      | 0.21111643 | 5.45E-21 |
| SRRM1      | 0.32363521 | 5.49E-21 |
| SENP7      | 0.16311934 | 5.50E-21 |
| AC105285.1 | 0.12274403 | 5.57E-21 |
| NOL12      | 0.01296683 | 5.71E-21 |
| LIPT1      | 0.13841876 | 5.93E-21 |
| OTUB1      | 0.02379627 | 5.94E-21 |
| ORC4       | 0.08708927 | 5.97E-21 |
| DTD2       | 0.12510848 | 6.05E-21 |
| EPG5       | 0.09237027 | 6.07E-21 |
| IFT122     | 0.0819314  | 6.11E-21 |
| CTPS1      | 0.15341577 | 6.22E-21 |
| P2RX4      | 0.11847495 | 6.27E-21 |
| EXOC3      | 0.17612427 | 6.28E-21 |
| YBX1       | -0.3648213 | 6.28E-21 |
| MAGOH      | -0.1141486 | 6.31E-21 |
| IARS       | 0.20448955 | 6.31E-21 |
| SNHG9      | 0.16612749 | 6.39E-21 |
| ATP6V1F    | 0.36460111 | 6.41E-21 |
| ELP5       | -0.1431722 | 6.43E-21 |
| AUP1       | -0.1441707 | 6.49E-21 |
| GON7       | 0.1568704  | 6.53E-21 |
| PLA2G12A   | 0.06221242 | 6.54E-21 |
| C1D        | -0.0309504 | 6.65E-21 |
| TMEM97     | 0.11207123 | 6.76E-21 |
| ALKBH3     | 0.08631312 | 6.77E-21 |
| ACOT11     | 0.16504634 | 6.80E-21 |
| TSPYL4     | -0.0665622 | 7.09E-21 |
| PLEKHM1    | -0.1640074 | 7.14E-21 |
| B3GALT6    | 0.09083608 | 7.17E-21 |
| ADAL       | 0.13797741 | 7.51E-21 |
| USF2       | 0.25059456 | 7.67E-21 |
| SYNJ2BP    | 0.15552097 | 7.92E-21 |
| RNF168     | -0.3188537 | 8.01E-21 |
| LRRC8C     | -0.3685916 | 8.01E-21 |

|            |            |          |
|------------|------------|----------|
| UBE2G2     | 0.23440926 | 8.10E-21 |
| ARV1       | 0.13249458 | 8.17E-21 |
| ARHGAP15   | 0.18732727 | 8.19E-21 |
| AC004951.1 | 0.1377092  | 8.33E-21 |
| LAMP1      | 0.24405116 | 8.35E-21 |
| NSD2       | -0.0753468 | 8.61E-21 |
| ERCC3      | 0.05530755 | 8.77E-21 |
| ADIPOR1    | -0.1043682 | 8.77E-21 |
| DUS1L      | 0.14383909 | 8.88E-21 |
| CZIB       | 0.10347435 | 8.92E-21 |
| AP1G1      | -0.2701343 | 9.09E-21 |
| HRAS       | -0.2144771 | 9.13E-21 |
| HAX1       | 0.00447116 | 9.18E-21 |
| TAB2       | -0.0240807 | 9.20E-21 |
| ZSWIM6     | -0.2885376 | 9.24E-21 |
| STARD7     | 0.17993987 | 9.26E-21 |
| FER        | 0.13025483 | 9.46E-21 |
| YES1       | -0.1814721 | 9.49E-21 |
| ARRDC5     | 0.09619235 | 9.52E-21 |
| OSTM1      | 0.12698612 | 9.53E-21 |
| DNAAF2     | 0.14660659 | 9.57E-21 |
| RNF181     | -0.1969818 | 9.70E-21 |
| BAK1       | -0.1759026 | 9.86E-21 |
| AFTPH      | -0.2048088 | 9.95E-21 |
| JPX        | 0.39515667 | 1.02E-20 |
| VPS8       | 0.08792867 | 1.03E-20 |
| RC3H2      | -0.2041722 | 1.04E-20 |
| HMGA1      | -0.4457159 | 1.04E-20 |
| EAF1       | -0.2124421 | 1.05E-20 |
| MPHOSPH9   | 0.19942672 | 1.05E-20 |
| EIF2B1     | 0.15676013 | 1.06E-20 |
| CPTP       | -0.1631902 | 1.09E-20 |
| MRPL27     | -0.1194402 | 1.11E-20 |
| NFAT5      | -0.1573219 | 1.12E-20 |
| ZNF33A     | 0.22865223 | 1.13E-20 |
| SAFB       | 0.18124113 | 1.15E-20 |
| USP33      | 0.22108151 | 1.16E-20 |
| ZNF587B    | 0.10484781 | 1.17E-20 |
| ADH5       | 0.17768542 | 1.19E-20 |
| BEND6      | 0.16333621 | 1.22E-20 |
| ADD3       | 0.23234011 | 1.23E-20 |
| COPS2      | -0.2869119 | 1.25E-20 |
| PWWP2B     | -0.2154491 | 1.27E-20 |
| KIF5B      | -0.1945279 | 1.27E-20 |
| RBX1       | 0.33899431 | 1.28E-20 |
| TIMM44     | 0.05495218 | 1.32E-20 |
| RNF5       | 0.15531839 | 1.32E-20 |
| YLPM1      | 0.18663761 | 1.33E-20 |
| AL513128.2 | 0.10842175 | 1.33E-20 |
| GCN1       | 0.09291228 | 1.34E-20 |

|            |            |          |
|------------|------------|----------|
| HPCAL1     | -0.1695912 | 1.34E-20 |
| PLRG1      | 0.16144044 | 1.35E-20 |
| TRABD      | -0.1204821 | 1.37E-20 |
| AC022087.1 | 0.07347173 | 1.39E-20 |
| MRPL30     | 0.16872969 | 1.39E-20 |
| EMC4       | 0.10495157 | 1.41E-20 |
| SLC25A38   | 0.09716485 | 1.43E-20 |
| CDC5L      | -0.1180233 | 1.43E-20 |
| LMAN2      | -0.1771959 | 1.46E-20 |
| C12orf66   | 0.10052442 | 1.49E-20 |
| RNF169     | 0.12359737 | 1.50E-20 |
| PPM1B      | -0.1755773 | 1.51E-20 |
| RRP7A      | -0.0927551 | 1.52E-20 |
| RNF216     | 0.06911827 | 1.54E-20 |
| PPCS       | 0.34191732 | 1.57E-20 |
| RNF125     | -0.2762091 | 1.58E-20 |
| EIF4E2     | -0.0793507 | 1.59E-20 |
| HDHD2      | 0.15553716 | 1.60E-20 |
| PACC1      | 0.0778633  | 1.61E-20 |
| AC099518.5 | 0.04294369 | 1.61E-20 |
| PDIA4      | 0.11166322 | 1.69E-20 |
| DOCK11     | 0.14641103 | 1.73E-20 |
| CEP192     | 0.15817955 | 1.73E-20 |
| CLPB       | 0.16181558 | 1.76E-20 |
| ANKAR      | 0.08247169 | 1.76E-20 |
| PIGC       | 0.16907665 | 1.82E-20 |
| RNF114     | -0.2080213 | 1.84E-20 |
| FNDC3A     | 0.09103369 | 1.85E-20 |
| FADS1      | 0.26989119 | 1.85E-20 |
| EIF2B2     | -0.2161235 | 1.85E-20 |
| ARHGAP11A  | 0.1594309  | 1.87E-20 |
| IMPACT     | 0.23188149 | 1.92E-20 |
| CEP128     | 0.14083108 | 1.93E-20 |
| ABT1       | -0.1446481 | 1.94E-20 |
| HS2ST1     | 0.12685352 | 1.96E-20 |
| CXorf21    | 0.22868596 | 1.96E-20 |
| APLP2      | 0.47636249 | 1.97E-20 |
| SEPTIN9    | -0.1658791 | 1.97E-20 |
| UTP14A     | 0.2156935  | 2.10E-20 |
| PHF23      | -0.1666595 | 2.11E-20 |
| PABPC4     | 0.28984793 | 2.11E-20 |
| DIS3L      | 0.14647966 | 2.24E-20 |
| NIF3L1     | 0.09177333 | 2.26E-20 |
| RNF166     | -0.2334611 | 2.26E-20 |
| GATAD1     | 0.28961956 | 2.27E-20 |
| MAGT1      | -0.1622115 | 2.27E-20 |
| WDR75      | 0.0851994  | 2.28E-20 |
| MLLT1      | 0.16095847 | 2.29E-20 |
| STX10      | 0.04288447 | 2.30E-20 |
| RPRD1A     | 0.07207299 | 2.34E-20 |



|          |            |          |
|----------|------------|----------|
| TMEM242  | -0.1229316 | 2.36E-20 |
| RNF4     | -0.1539846 | 2.37E-20 |
| UBE2G1   | -0.077867  | 2.39E-20 |
| PAN3     | 0.09343541 | 2.40E-20 |
| BAG6     | -0.0330689 | 2.44E-20 |
| B4GALT1  | -0.1429815 | 2.45E-20 |
| PRPF6    | 0.20536948 | 2.47E-20 |
| MGMT     | -0.1315551 | 2.53E-20 |
| METTL15  | 0.11881907 | 2.57E-20 |
| BCL7C    | -0.1382373 | 2.57E-20 |
| UBN2     | 0.20469717 | 2.57E-20 |
| SLC39A8  | 0.14499467 | 2.59E-20 |
| LIMD1    | -0.1652297 | 2.60E-20 |
| BCCIP    | 0.15202268 | 2.62E-20 |
| KIF1BP   | -0.228454  | 2.65E-20 |
| PGP      | 0.14076518 | 2.76E-20 |
| IFT52    | 0.09054578 | 2.78E-20 |
| RABGAP1  | 0.19520819 | 2.82E-20 |
| KIAA1143 | 0.1944679  | 2.85E-20 |
| PLEKHA3  | 0.05396352 | 2.91E-20 |
| SPATA13  | -0.219856  | 2.95E-20 |
| EMC7     | -0.1762621 | 2.96E-20 |
| CCNY     | 0.18378987 | 2.97E-20 |
| RPAIN    | 0.19746944 | 2.97E-20 |
| ICOSLG   | -0.2141947 | 3.02E-20 |
| L3HYPDH  | 0.08632219 | 3.14E-20 |
| ALG6     | 0.08927206 | 3.16E-20 |
| UBE2S    | -0.2245021 | 3.16E-20 |
| CALCOCO1 | 0.0158474  | 3.17E-20 |
| BOLA2B   | 0.11482804 | 3.17E-20 |
| ZNF844   | 0.09794288 | 3.18E-20 |
| GGPS1    | 0.14598382 | 3.18E-20 |
| VKORC1L1 | 0.06884409 | 3.24E-20 |
| GMPS     | 0.00073859 | 3.26E-20 |
| SNRPA    | -0.1991579 | 3.28E-20 |
| ISOC1    | 0.06169258 | 3.32E-20 |
| DLG1     | 0.12496052 | 3.40E-20 |
| PRPS2    | 0.08814131 | 3.40E-20 |
| NUDT6    | 0.15183927 | 3.43E-20 |
| ROBO3    | -0.1929639 | 3.44E-20 |
| THUMPD2  | 0.14948186 | 3.45E-20 |
| BLMH     | 0.09091686 | 3.49E-20 |
| DRAM2    | 0.10099667 | 3.53E-20 |
| GALNT7   | 0.2712981  | 3.53E-20 |
| SLC43A1  | 0.12343721 | 3.56E-20 |
| KHNYN    | -0.221171  | 3.58E-20 |
| TIFA     | 0.10733612 | 3.61E-20 |
| PFDN6    | 0.14455783 | 3.64E-20 |
| VRK3     | -0.040908  | 3.65E-20 |
| TM9SF4   | 0.09137884 | 3.69E-20 |

|            |            |          |
|------------|------------|----------|
| HDAC8      | 0.19706074 | 3.71E-20 |
| DCTN5      | 0.03969715 | 3.72E-20 |
| SH3GL1     | -0.1595951 | 3.81E-20 |
| SRSF4      | -0.2068775 | 3.81E-20 |
| GPI        | 0.17030678 | 3.82E-20 |
| RIN3       | -0.2474251 | 3.82E-20 |
| IVNS1ABP   | -0.2752349 | 3.86E-20 |
| AC138649.1 | 0.12893339 | 3.86E-20 |
| ACAT1      | 0.16848092 | 3.89E-20 |
| TMEM69     | 0.06517557 | 3.89E-20 |
| PLAU       | -0.3335107 | 3.96E-20 |
| TXNDC17    | -0.1467141 | 3.97E-20 |
| CSPP1      | -0.2682046 | 3.98E-20 |
| SNRNP25    | 0.11178997 | 4.05E-20 |
| ASPH       | 0.19228362 | 4.09E-20 |
| CCL5       | -0.5850506 | 4.15E-20 |
| FAM13A     | 0.01779094 | 4.21E-20 |
| FBXL20     | 0.1167149  | 4.22E-20 |
| RPS19BP1   | -0.1634733 | 4.27E-20 |
| KANSL2     | 0.03549829 | 4.29E-20 |
| POLR1B     | 0.10762169 | 4.30E-20 |
| CEBPZ      | 0.24857512 | 4.36E-20 |
| CACUL1     | -0.2034311 | 4.42E-20 |
| SYK        | 0.18955626 | 4.49E-20 |
| GNB2       | -0.1729874 | 4.50E-20 |
| CCDC102B   | 0.14715344 | 4.53E-20 |
| TBC1D10B   | -0.1395407 | 4.54E-20 |
| FERMT3     | -0.2555725 | 4.57E-20 |
| CYB5R4     | 0.17568622 | 4.60E-20 |
| COMMD10    | 0.08629712 | 4.63E-20 |
| UBASH3B    | -0.2531059 | 4.65E-20 |
| TRAPPC4    | -0.1795738 | 4.70E-20 |
| CAPN2      | -0.2178505 | 4.88E-20 |
| IDE        | 0.13940399 | 4.92E-20 |
| COX18      | 0.1488021  | 4.95E-20 |
| RPL27      | 0.18468795 | 4.95E-20 |
| ZC3HAV1L   | 0.07505022 | 4.98E-20 |
| STX1A      | -0.1481038 | 5.00E-20 |
| HCFC1R1    | -0.0694191 | 5.06E-20 |
| AL109811.2 | 0.11308917 | 5.10E-20 |
| PTDSS1     | 0.14310961 | 5.25E-20 |
| NIFK-AS1   | 0.11551835 | 5.26E-20 |
| RNF113A    | 0.10860158 | 5.30E-20 |
| ZNF43      | 0.22416433 | 5.31E-20 |
| NOTCH3     | -0.1786949 | 5.41E-20 |
| PLEKHM3    | 0.13131791 | 5.54E-20 |
| ZNF490     | 0.12010659 | 5.56E-20 |
| METTL4     | 0.10386625 | 5.57E-20 |
| SNX18      | 0.11935758 | 5.62E-20 |
| WDR89      | 0.08719585 | 5.68E-20 |

|            |            |          |
|------------|------------|----------|
| LINC02256  | 0.27840931 | 5.71E-20 |
| SSRP1      | 0.09845125 | 5.73E-20 |
| OSGEPL1    | 0.12254511 | 5.79E-20 |
| PSAP       | 0.1612718  | 5.81E-20 |
| NCOA3      | -0.3448999 | 5.86E-20 |
| MAP3K4     | 0.1664489  | 5.93E-20 |
| FKBP5      | -0.1855132 | 5.99E-20 |
| DCTD       | 0.0132194  | 5.99E-20 |
| C1orf56    | -0.1930371 | 6.00E-20 |
| GPALPP1    | 0.19880997 | 6.14E-20 |
| GDF11      | 0.19793582 | 6.14E-20 |
| RBM4B      | 0.05625267 | 6.19E-20 |
| TMEM259    | -0.1421672 | 6.22E-20 |
| UBAP1      | -0.1994785 | 6.29E-20 |
| MAGOHB     | 0.11411207 | 6.41E-20 |
| RRP36      | -0.0859247 | 6.43E-20 |
| CD300LF    | 0.05391879 | 6.58E-20 |
| MSH2       | 0.15343937 | 6.65E-20 |
| GLI4       | 0.10884223 | 6.80E-20 |
| SACM1L     | 0.0085069  | 6.83E-20 |
| UBE2Z      | -0.3211069 | 6.87E-20 |
| PPP6C      | -0.227053  | 6.88E-20 |
| CLASP2     | 0.13635072 | 6.90E-20 |
| DLGAP4     | -0.2173727 | 7.03E-20 |
| UBL7       | 0.09873721 | 7.03E-20 |
| NDFIP1     | -0.2756995 | 7.05E-20 |
| CTNS       | 0.09434396 | 7.18E-20 |
| NCOA1      | 0.16595854 | 7.21E-20 |
| HMG3       | 0.3001399  | 7.22E-20 |
| KDM6A      | -0.1310638 | 7.29E-20 |
| THAP11     | -0.1000756 | 7.34E-20 |
| RRP15      | 0.18386455 | 7.42E-20 |
| WDSUB1     | 0.15023219 | 7.43E-20 |
| NELFA      | -0.0388531 | 7.59E-20 |
| CTSA       | 0.24891262 | 7.62E-20 |
| ZNF146     | 0.16061534 | 7.64E-20 |
| SGK3       | 0.29241955 | 7.64E-20 |
| DERL2      | -0.1740941 | 7.81E-20 |
| RNF138     | -0.1787193 | 7.90E-20 |
| LIPA       | 0.05545403 | 7.96E-20 |
| XBP1       | -0.4362229 | 8.00E-20 |
| SLC30A5    | 0.04223066 | 8.06E-20 |
| VDAC1      | 0.34891984 | 8.06E-20 |
| WDR13      | -0.2082666 | 8.14E-20 |
| AC079781.5 | 0.10614216 | 8.16E-20 |
| THAP12     | -0.1566267 | 8.24E-20 |
| ZBTB46     | -0.2067821 | 8.29E-20 |
| RPUSD4     | 0.0777405  | 8.61E-20 |
| SZRD1      | -0.2217361 | 8.94E-20 |
| MGAT2      | 0.04564773 | 8.95E-20 |

|           |            |          |
|-----------|------------|----------|
| EMC6      | -0.1098076 | 8.97E-20 |
| TOR1AIP1  | 0.20511127 | 8.98E-20 |
| STMN1     | -0.1120732 | 9.07E-20 |
| RAPGEF1   | 0.09582265 | 9.17E-20 |
| PIH1D1    | -0.0633832 | 9.17E-20 |
| RPL7L1    | 0.22873404 | 9.27E-20 |
| LAGE3     | 0.12334846 | 9.31E-20 |
| SDF2L1    | -0.0243498 | 9.55E-20 |
| IL27RA    | -0.3132657 | 1.00E-19 |
| PSMD6     | -0.2332477 | 1.00E-19 |
| MRPL32    | 0.11140584 | 1.01E-19 |
| HEATR1    | 0.13765573 | 1.05E-19 |
| CLTB      | -0.1084042 | 1.05E-19 |
| PPP2R2A   | -0.2469305 | 1.06E-19 |
| CAPN1     | -0.224428  | 1.06E-19 |
| POLDIP3   | -0.0874604 | 1.08E-19 |
| POU2F2    | -0.3314734 | 1.10E-19 |
| RPF2      | 0.19131266 | 1.10E-19 |
| POLR2E    | -0.0893064 | 1.11E-19 |
| LRIG2     | 0.06820264 | 1.11E-19 |
| DTNBP1    | 0.123619   | 1.13E-19 |
| EDC4      | -0.0613526 | 1.15E-19 |
| CLDND1    | -0.3511057 | 1.17E-19 |
| PREPL     | 0.15432542 | 1.17E-19 |
| CD2AP     | -0.3280308 | 1.18E-19 |
| SPNS1     | -0.01358   | 1.18E-19 |
| MSL3      | 0.04861882 | 1.18E-19 |
| TRIM38    | 0.24294274 | 1.19E-19 |
| RNF214    | 0.14124584 | 1.20E-19 |
| ANKRD49   | 0.12896172 | 1.20E-19 |
| NOP10     | -0.3217244 | 1.21E-19 |
| SLC35C2   | 0.0867018  | 1.21E-19 |
| FANCA     | 0.09188049 | 1.23E-19 |
| SLC26A2   | 0.25904392 | 1.24E-19 |
| C6orf89   | 0.03309752 | 1.27E-19 |
| GORASP2   | -0.1778622 | 1.28E-19 |
| MAPKAPK5- | 0.08612202 | 1.28E-19 |
| ING4      | 0.14900458 | 1.31E-19 |
| EIF3J-DT  | 0.1611829  | 1.32E-19 |
| QARS      | 0.08622088 | 1.33E-19 |
| ZNF169    | 0.06822564 | 1.33E-19 |
| RUNX2     | 0.1562863  | 1.36E-19 |
| RB1       | 0.19552192 | 1.37E-19 |
| RPL29     | -0.2830992 | 1.38E-19 |
| GCFC2     | 0.1073461  | 1.39E-19 |
| CDKN2AIPN | 0.04866869 | 1.40E-19 |
| N6AMT1    | 0.08691208 | 1.41E-19 |
| DUSP10    | -0.2029874 | 1.43E-19 |
| MRPS28    | 0.10329993 | 1.44E-19 |
| SLU7      | -0.2153877 | 1.45E-19 |

|                       |            |          |
|-----------------------|------------|----------|
| RFNG                  | 0.09774799 | 1.47E-19 |
| TMEM128               | 0.07806876 | 1.48E-19 |
| CSGALNAC <sup>-</sup> | -0.2181765 | 1.48E-19 |
| CNOT2                 | -0.2477321 | 1.48E-19 |
| NXT1                  | -0.0976961 | 1.48E-19 |
| AP1AR                 | 0.14055475 | 1.50E-19 |
| AL096870.8            | 0.13923119 | 1.52E-19 |
| DERL1                 | -0.2189093 | 1.55E-19 |
| KYAT3                 | 0.09313314 | 1.55E-19 |
| ZNF675                | 0.10843986 | 1.56E-19 |
| NPRL2                 | 0.14854995 | 1.58E-19 |
| MGST2                 | 0.19346445 | 1.59E-19 |
| NUDT9                 | 0.07424199 | 1.60E-19 |
| MPLKIP                | 0.17073491 | 1.61E-19 |
| ZNF106                | 0.26623035 | 1.63E-19 |
| PARG                  | 0.06923013 | 1.65E-19 |
| ZNF667                | -0.2917871 | 1.65E-19 |
| AC246817.1            | 0.12558239 | 1.65E-19 |
| SIN3A                 | -0.1257667 | 1.65E-19 |
| SLC22A16              | 0.10502461 | 1.67E-19 |
| COA4                  | 0.26179635 | 1.68E-19 |
| MYNN                  | -0.0296254 | 1.69E-19 |
| DCAF17                | 0.10989408 | 1.70E-19 |
| ERP44                 | -0.211355  | 1.70E-19 |
| USP11                 | 0.08320235 | 1.74E-19 |
| UVRAG                 | 0.03599057 | 1.74E-19 |
| RGL4                  | -0.2016449 | 1.77E-19 |
| ERCC5                 | 0.19927    | 1.81E-19 |
| SETD5                 | -0.15903   | 1.82E-19 |
| SNX17                 | -0.0638398 | 1.82E-19 |
| DNAJC3                | -0.2606061 | 1.83E-19 |
| NUCKS1                | 0.31344637 | 1.86E-19 |
| PLGLB2                | 0.10929548 | 1.89E-19 |
| PTTG1IP               | 0.24283159 | 1.89E-19 |
| ZNF573                | 0.07832628 | 1.90E-19 |
| HSPH1                 | 0.20982202 | 1.92E-19 |
| TBC1D1                | 0.12347657 | 1.94E-19 |
| AAMDC                 | 0.12905892 | 1.94E-19 |
| RPA2                  | 0.2147492  | 1.96E-19 |
| RIPOR1                | -0.2548153 | 2.01E-19 |
| MANEA                 | 0.11493438 | 2.02E-19 |
| MTMR12                | -0.2538777 | 2.03E-19 |
| PDE3B                 | 0.16553587 | 2.05E-19 |
| FUCA2                 | 0.15216042 | 2.05E-19 |
| IST1                  | -0.2096276 | 2.06E-19 |
| SPRYD7                | 0.10681721 | 2.06E-19 |
| TEX264                | 0.04501026 | 2.07E-19 |
| L3MBTL2               | 0.08774243 | 2.09E-19 |
| NBR2                  | 0.09536598 | 2.11E-19 |
| CEP78                 | 0.16554762 | 2.11E-19 |

|            |            |          |
|------------|------------|----------|
| C20orf27   | 0.06875556 | 2.15E-19 |
| GPR89A     | 0.08413944 | 2.20E-19 |
| IBTK       | 0.15831592 | 2.21E-19 |
| PIKFYVE    | 0.24833615 | 2.24E-19 |
| UROD       | 0.06727977 | 2.24E-19 |
| NRBP1      | -0.1510029 | 2.26E-19 |
| COQ5       | 0.06691472 | 2.26E-19 |
| SERPINB9   | -0.3004108 | 2.27E-19 |
| NUP133     | 0.10329146 | 2.27E-19 |
| PDAP1      | 0.16858438 | 2.30E-19 |
| ALKBH4     | 0.05497265 | 2.30E-19 |
| METAP1     | 0.12732339 | 2.33E-19 |
| TRIO       | 0.03986631 | 2.34E-19 |
| KIAA1109   | 0.13841044 | 2.36E-19 |
| TRIAP1     | 0.06400342 | 2.37E-19 |
| C11orf98   | 0.09474551 | 2.39E-19 |
| CBFB       | 0.12331518 | 2.40E-19 |
| U2AF2      | 0.11952567 | 2.40E-19 |
| SDC4       | -0.1783187 | 2.44E-19 |
| KLF4       | -0.1945662 | 2.47E-19 |
| CBFA2T2    | 0.13054669 | 2.49E-19 |
| PAXBP1     | 0.27018793 | 2.49E-19 |
| PTK2B      | -0.095395  | 2.51E-19 |
| WDR48      | -0.1437887 | 2.53E-19 |
| AC018638.7 | 0.06888721 | 2.56E-19 |
| CYTH2      | -0.217852  | 2.60E-19 |
| AK6        | -0.0038332 | 2.63E-19 |
| HECA       | -0.1443647 | 2.65E-19 |
| DCP2       | 0.16492233 | 2.68E-19 |
| MRS2       | 0.10490012 | 2.68E-19 |
| SP110      | 0.11084889 | 2.69E-19 |
| DCPS       | 0.11814968 | 2.70E-19 |
| BRMS1      | -0.0042382 | 2.74E-19 |
| METTL5     | 0.16501622 | 2.76E-19 |
| B4GALT6    | 0.13477419 | 2.84E-19 |
| ZNF24      | -0.0610079 | 2.85E-19 |
| KTI12      | 0.08245111 | 2.91E-19 |
| MRFAP1L1   | 0.10368735 | 2.91E-19 |
| DDOST      | -0.1434527 | 2.91E-19 |
| ZNF524     | 0.05703094 | 2.93E-19 |
| MLX        | -0.1097378 | 2.93E-19 |
| TAMM41     | 0.0679023  | 2.98E-19 |
| CCDC28A    | 0.03063118 | 3.00E-19 |
| BCAS3      | 0.10071648 | 3.01E-19 |
| RCN1       | 0.20263653 | 3.06E-19 |
| RFXANK     | 0.04580164 | 3.07E-19 |
| SPATA2L    | -0.2028571 | 3.12E-19 |
| SNUPN      | 0.18333078 | 3.16E-19 |
| LZTS2      | -0.0900868 | 3.19E-19 |
| CWF19L2    | 0.19405039 | 3.19E-19 |

|           |            |          |
|-----------|------------|----------|
| DOCK2     | 0.30688264 | 3.20E-19 |
| FHL3      | -0.2157501 | 3.20E-19 |
| ZNF195    | 0.20251196 | 3.22E-19 |
| TBP       | 0.06150874 | 3.22E-19 |
| EHBP1     | 0.10281152 | 3.26E-19 |
| LYPLAL1   | 0.11966817 | 3.29E-19 |
| SCLT1     | 0.09112642 | 3.31E-19 |
| SHOC2     | -0.2466472 | 3.32E-19 |
| CAPRIN1   | 0.28525418 | 3.37E-19 |
| SERPING1  | -0.239881  | 3.41E-19 |
| IFT172    | 0.06857906 | 3.42E-19 |
| DCAF12    | 0.08365335 | 3.42E-19 |
| RAE1      | -0.1594258 | 3.43E-19 |
| AP3B1     | 0.16176656 | 3.45E-19 |
| DYRK1B    | -0.2193499 | 3.46E-19 |
| HDAC6     | 0.10276217 | 3.47E-19 |
| SLC35A3   | 0.10678424 | 3.48E-19 |
| QSER1     | 0.09509181 | 3.50E-19 |
| PGAM5     | 0.07510468 | 3.53E-19 |
| PIP4K2B   | 0.12970693 | 3.54E-19 |
| ZNF124    | 0.11171216 | 3.58E-19 |
| RNF34     | -0.1654844 | 3.58E-19 |
| COPB1     | -0.1859447 | 3.60E-19 |
| TMEM14B   | 0.30084722 | 3.62E-19 |
| RPIA      | 0.14289645 | 3.63E-19 |
| SNHG1     | 0.18490934 | 3.63E-19 |
| SSU72     | 0.24983521 | 3.65E-19 |
| ANXA4     | 0.16059216 | 3.68E-19 |
| TOMM6     | 0.30360752 | 3.71E-19 |
| TRAPPC12  | 0.11707439 | 3.71E-19 |
| SOCS7     | 0.07735641 | 3.75E-19 |
| COMMD1    | 0.07230135 | 3.81E-19 |
| XPO1      | 0.27801984 | 3.85E-19 |
| NNT       | 0.17828552 | 3.86E-19 |
| C21orf91  | 0.14248763 | 3.91E-19 |
| ZNF512    | 0.13564456 | 3.92E-19 |
| CDIPT     | 0.01303064 | 3.94E-19 |
| HCFC1     | 0.07333687 | 3.98E-19 |
| CCDC117   | 0.14096258 | 4.01E-19 |
| S100A9    | -0.3500587 | 4.07E-19 |
| MICU1     | 0.13614424 | 4.10E-19 |
| SH3TC1    | -0.1966903 | 4.14E-19 |
| FAF2      | -0.1856381 | 4.32E-19 |
| TRIM5     | 0.16124546 | 4.34E-19 |
| RIT1      | -0.2441739 | 4.35E-19 |
| TMEM59    | -0.3215659 | 4.38E-19 |
| SDHB      | 0.03070258 | 4.39E-19 |
| RBM26-AS1 | 0.10201362 | 4.47E-19 |
| HIF1AN    | 0.02249214 | 4.48E-19 |
| PDS5B     | 0.12309595 | 4.53E-19 |

|            |            |          |
|------------|------------|----------|
| STK32C     | 0.17950169 | 4.53E-19 |
| MRPL14     | 0.07858781 | 4.58E-19 |
| KAT8       | 0.07430856 | 4.62E-19 |
| TOMM40     | 0.10545    | 4.66E-19 |
| TUBGCP3    | 0.09868503 | 4.66E-19 |
| JPT1       | -0.1611854 | 4.71E-19 |
| BUD23      | -0.0034841 | 4.71E-19 |
| ILF2       | -0.3288369 | 4.75E-19 |
| MATR3.1    | 0.1506435  | 4.79E-19 |
| SMARCAL1   | 0.09138827 | 4.79E-19 |
| DNM1L      | 0.01007693 | 4.82E-19 |
| MTREX      | 0.08593793 | 4.84E-19 |
| ZC3H7A     | 0.078956   | 4.86E-19 |
| BX890604.2 | 0.26565553 | 4.94E-19 |
| APIP       | 0.17037641 | 4.95E-19 |
| GFM1       | 0.0901554  | 4.98E-19 |
| RNF40      | 0.01190697 | 5.02E-19 |
| AL356599.1 | 0.09872471 | 5.03E-19 |
| ATMIN      | 0.07405872 | 5.03E-19 |
| PCNT       | 0.1623192  | 5.05E-19 |
| FBXL15     | 0.06072222 | 5.12E-19 |
| IL16       | 0.1657568  | 5.22E-19 |
| USP3       | -0.1567693 | 5.35E-19 |
| AC123768.4 | 0.06143831 | 5.47E-19 |
| TNIP1      | -0.2129506 | 5.48E-19 |
| GPR146     | -0.2935092 | 5.51E-19 |
| SLC37A1    | -0.0818648 | 5.52E-19 |
| BLCAP      | -0.1219317 | 5.55E-19 |
| ZNF618     | 0.11767396 | 5.78E-19 |
| DENND3     | -0.2697113 | 5.84E-19 |
| SETD1B     | -0.0375152 | 5.89E-19 |
| WDR26      | -0.0665944 | 5.89E-19 |
| NSMCE3     | 0.08192672 | 5.99E-19 |
| SRF        | -0.0503964 | 6.02E-19 |
| IKBKB      | 0.05240234 | 6.05E-19 |
| MAPK9      | 0.14540013 | 6.10E-19 |
| ALG10B     | 0.1380086  | 6.14E-19 |
| USP22      | -0.176238  | 6.15E-19 |
| NR1D2      | 0.15531255 | 6.16E-19 |
| PPIH       | 0.03629628 | 6.22E-19 |
| RTN4R      | -0.2144186 | 6.27E-19 |
| HIST1H2AC  | -0.2183726 | 6.43E-19 |
| SLC50A1    | -0.2094851 | 6.45E-19 |
| ERVK3-1    | -0.1591942 | 6.52E-19 |
| ALAS1      | -0.2058132 | 6.55E-19 |
| YIF1A      | -0.0909108 | 6.57E-19 |
| MTCH1      | -0.2072283 | 6.57E-19 |
| CTCF       | -0.0489108 | 6.59E-19 |
| DENND1B    | 0.20698423 | 6.60E-19 |
| MIR17HG    | 0.08699515 | 6.62E-19 |



|           |            |          |
|-----------|------------|----------|
| PJA2      | -0.2899329 | 6.63E-19 |
| WASHC4    | 0.19577786 | 6.70E-19 |
| COIL      | 0.07891048 | 6.72E-19 |
| ECPAS     | 0.11223373 | 6.86E-19 |
| ST3GAL4   | 0.15307786 | 6.90E-19 |
| TFCP2     | 0.14374164 | 6.90E-19 |
| SDHAF4    | 0.11533283 | 6.95E-19 |
| NINJ2     | 0.12931762 | 6.96E-19 |
| UPF3A     | 0.26703306 | 6.97E-19 |
| LENG8     | -0.2070491 | 7.01E-19 |
| CISD1     | 0.08355526 | 7.16E-19 |
| VIRMA     | 0.003402   | 7.19E-19 |
| AGPS      | 0.10275545 | 7.27E-19 |
| MID1IP1   | -0.2153277 | 7.28E-19 |
| C2orf69   | 0.12606083 | 7.29E-19 |
| ZFP14     | 0.15112484 | 7.31E-19 |
| IDH2      | -0.1571242 | 7.34E-19 |
| GATC      | 0.12359485 | 7.36E-19 |
| EIF1B-AS1 | 0.11826637 | 7.39E-19 |
| NCF2      | -0.2743797 | 7.40E-19 |
| RAB4B     | 0.12651989 | 7.42E-19 |
| LINC00205 | 0.12442833 | 7.52E-19 |
| GNB4      | -0.2084001 | 7.60E-19 |
| FAM76B    | 0.10246948 | 7.65E-19 |
| RC3H1     | -0.244934  | 7.70E-19 |
| CTSZ      | -0.1770404 | 7.81E-19 |
| GNPDA2    | 0.08842858 | 7.86E-19 |
| VPS26C    | -0.208907  | 8.06E-19 |
| SNAP29    | -0.1971523 | 8.08E-19 |
| CHMP2B    | -0.2291924 | 8.12E-19 |
| COPE      | -0.2854619 | 8.13E-19 |
| DPM1      | -0.1945483 | 8.14E-19 |
| DTWD2     | 0.10134686 | 8.15E-19 |
| TSHZ1     | 0.06837751 | 8.18E-19 |
| AASDH     | 0.09472683 | 8.23E-19 |
| ACTR10    | -0.0929773 | 8.29E-19 |
| SFT2D1    | 0.02113812 | 8.30E-19 |
| ZNF727    | 0.16535761 | 8.33E-19 |
| ZNF101    | 0.08616199 | 8.41E-19 |
| AQR       | 0.15129065 | 8.41E-19 |
| TCF15     | 0.09832779 | 8.42E-19 |
| ARMCX6    | -0.1670753 | 8.44E-19 |
| IP6K1     | -0.1952223 | 8.47E-19 |
| NELFE     | -0.0336041 | 8.47E-19 |
| PPTC7     | -0.1924132 | 8.51E-19 |
| FAM192A   | 0.18675449 | 8.59E-19 |
| TOR1AIP2  | -0.043332  | 8.70E-19 |
| KBTBD7    | 0.10740468 | 8.71E-19 |
| SART1     | -0.0065867 | 8.94E-19 |
| MSRB1     | -0.0205236 | 9.06E-19 |

|         |            |          |
|---------|------------|----------|
| OGA     | -0.2360231 | 9.09E-19 |
| TMED8   | 0.05241199 | 9.12E-19 |
| RAB22A  | -0.2585552 | 9.13E-19 |
| TOR4A   | -0.1606238 | 9.19E-19 |
| TAPT1   | -0.1970934 | 9.25E-19 |
| ADAM15  | -0.196911  | 9.47E-19 |
| EML3    | 0.06622805 | 9.55E-19 |
| SETD3   | 0.03432924 | 9.55E-19 |
| NANS    | -0.0984274 | 9.87E-19 |
| SMAP1   | 0.13439844 | 1.02E-18 |
| ACTR1A  | -0.2352921 | 1.02E-18 |
| ATP11A  | 0.09995623 | 1.02E-18 |
| CLTC    | -0.1307152 | 1.03E-18 |
| PDCL    | 0.10859807 | 1.03E-18 |
| MMACHC  | 0.09484415 | 1.03E-18 |
| LRCH4   | -0.1023716 | 1.04E-18 |
| PFKFB3  | -0.2948193 | 1.08E-18 |
| NTHL1   | -0.0389776 | 1.08E-18 |
| ATP6V1D | -0.1550487 | 1.09E-18 |
| NOL10   | 0.09062428 | 1.10E-18 |
| PDLIM7  | -0.0599799 | 1.12E-18 |
| LIG4    | 0.13967389 | 1.13E-18 |
| ZNF681  | 0.18631677 | 1.13E-18 |
| ARPC4   | -0.1464992 | 1.13E-18 |
| RRBP1   | -0.3109896 | 1.16E-18 |
| NDUFAB1 | 0.1457379  | 1.18E-18 |
| CSNK2A2 | 0.03150964 | 1.18E-18 |
| CAST    | -0.3503422 | 1.18E-18 |
| RHOH    | -0.2014369 | 1.19E-18 |
| MRFAP1  | -0.0716678 | 1.19E-18 |
| SAFB2   | 0.10483492 | 1.20E-18 |
| TWNK    | 0.13127717 | 1.20E-18 |
| PLXNB2  | -0.226373  | 1.22E-18 |
| CHPF2   | -0.125578  | 1.27E-18 |
| KLHL24  | 0.27619794 | 1.28E-18 |
| PHTF1   | -0.1288862 | 1.28E-18 |
| SHKBP1  | -0.1668155 | 1.31E-18 |
| UBE2R2  | -0.2343177 | 1.32E-18 |
| MYPOP   | 0.0780871  | 1.32E-18 |
| TMEM43  | -0.1774446 | 1.33E-18 |
| PDXDC1  | 0.08261833 | 1.35E-18 |
| GMFB    | -0.1449101 | 1.35E-18 |
| PELP1   | 0.10006352 | 1.40E-18 |
| AGK     | 0.10260263 | 1.40E-18 |
| ALCAM   | 0.24956189 | 1.42E-18 |
| TAF2    | 0.05690013 | 1.42E-18 |
| MYO9A   | 0.14542823 | 1.43E-18 |
| VRK2    | 0.15124588 | 1.43E-18 |
| LSG1    | 0.13612609 | 1.43E-18 |
| CHST14  | 0.08358106 | 1.43E-18 |

|            |            |          |
|------------|------------|----------|
| NOSIP      | 0.0356124  | 1.44E-18 |
| EIF3M      | 0.26339228 | 1.49E-18 |
| MDM1       | 0.12901623 | 1.50E-18 |
| CYSLTR1    | 0.16034598 | 1.50E-18 |
| EPN1       | -0.1944036 | 1.51E-18 |
| TMEM273    | -0.2502519 | 1.53E-18 |
| TRPM7      | 0.16181895 | 1.54E-18 |
| MMP24OS    | -0.1330411 | 1.55E-18 |
| NUP54      | -0.1047896 | 1.56E-18 |
| PPP1R15B   | -0.1366577 | 1.56E-18 |
| AC022098.1 | 0.07425246 | 1.58E-18 |
| ITSN2      | -0.3035324 | 1.59E-18 |
| TSR3       | -0.0865885 | 1.59E-18 |
| TET1       | 0.08585043 | 1.59E-18 |
| COLGALT1   | 0.09983203 | 1.60E-18 |
| SLC25A40   | 0.10217929 | 1.61E-18 |
| GPBP1      | -0.1912368 | 1.61E-18 |
| TRPM2      | 0.10807692 | 1.61E-18 |
| GBP4       | 0.21663377 | 1.62E-18 |
| RELA       | -0.1856384 | 1.63E-18 |
| IRF2BP1    | -0.0079175 | 1.63E-18 |
| AMPD3      | 0.08115745 | 1.65E-18 |
| ATP10D     | 0.17330729 | 1.68E-18 |
| DNAJC24    | 0.10725948 | 1.70E-18 |
| DTWD1      | 0.23644085 | 1.72E-18 |
| CDK11B     | 0.11944533 | 1.73E-18 |
| LZTFL1     | -0.0492977 | 1.74E-18 |
| PDLIM4     | -0.1929052 | 1.75E-18 |
| FECH       | 0.10527672 | 1.76E-18 |
| CCDC86     | 0.07681339 | 1.76E-18 |
| TSN        | 0.12212923 | 1.76E-18 |
| EEF1AKMT4  | 0.08983779 | 1.78E-18 |
| RAB6A      | -0.1751836 | 1.78E-18 |
| C1GALT1    | 0.00354339 | 1.79E-18 |
| PPM1A      | -0.1342257 | 1.79E-18 |
| ZNF84      | 0.18726461 | 1.80E-18 |
| IPO7       | 0.20046541 | 1.81E-18 |
| STAT6      | 0.0935229  | 1.81E-18 |
| CPNE8      | 0.1622085  | 1.83E-18 |
| KCTD20     | 0.09325532 | 1.83E-18 |
| TXNIP      | -0.4732926 | 1.84E-18 |
| STK10      | -0.1904172 | 1.87E-18 |
| SPATC1L    | 0.138341   | 1.88E-18 |
| NSUN3      | 0.10042173 | 1.91E-18 |
| TIAL1      | 0.28261026 | 1.92E-18 |
| CBFA2T3    | -0.0739155 | 1.94E-18 |
| PHF21A     | 0.09652227 | 1.94E-18 |
| ETFRF1     | -0.2189487 | 1.95E-18 |
| MCTS1      | 0.20938742 | 1.99E-18 |
| ZNF808     | 0.05881858 | 2.00E-18 |

|            |            |          |
|------------|------------|----------|
| AC009950.1 | 0.07661127 | 2.06E-18 |
| TSNAX      | 0.19940843 | 2.06E-18 |
| TUFM       | -0.2031393 | 2.08E-18 |
| SND1       | 0.02866712 | 2.09E-18 |
| G2E3       | 0.09657967 | 2.11E-18 |
| NUTF2      | -0.1550117 | 2.12E-18 |
| ABCF2      | 0.08989843 | 2.15E-18 |
| FBXL12     | -0.1647826 | 2.16E-18 |
| SCRN3      | 0.08269712 | 2.18E-18 |
| METTL23    | 0.0452888  | 2.18E-18 |
| LMBRD2     | 0.10771343 | 2.19E-18 |
| ATP23      | 0.12496751 | 2.23E-18 |
| ACTN4      | -0.2649568 | 2.24E-18 |
| ZNF362     | 0.07688069 | 2.25E-18 |
| NMRAL1     | 0.04703636 | 2.26E-18 |
| SLC35E2B   | 0.04516109 | 2.27E-18 |
| RABL2A     | 0.0889695  | 2.28E-18 |
| MAD2L1     | 0.10628681 | 2.31E-18 |
| C1orf43    | -0.1097668 | 2.33E-18 |
| MRPS27     | 0.08729384 | 2.33E-18 |
| FDX2       | -0.1511603 | 2.36E-18 |
| CARD6      | 0.13568921 | 2.36E-18 |
| RBM41      | 0.17926201 | 2.37E-18 |
| ERI3       | 0.0563437  | 2.37E-18 |
| CAPN7      | 0.13773492 | 2.37E-18 |
| CDC37      | -0.1429994 | 2.38E-18 |
| SEMA4D     | 0.0566722  | 2.38E-18 |
| VBP1       | 0.08556268 | 2.43E-18 |
| DHODH      | 0.1020816  | 2.43E-18 |
| GNAQ       | 0.29730427 | 2.44E-18 |
| NUDC       | -0.0955269 | 2.48E-18 |
| DMXL1      | 0.15139065 | 2.49E-18 |
| CASP1      | 0.03155451 | 2.50E-18 |
| ANKRD40    | -0.0523746 | 2.50E-18 |
| TESK2      | 0.09894792 | 2.52E-18 |
| PPP3CB-AS  | 0.13429269 | 2.52E-18 |
| WASHC3     | 0.07687054 | 2.53E-18 |
| SLC39A1    | -0.0692199 | 2.58E-18 |
| ALS2       | 0.20484348 | 2.64E-18 |
| ZNF561     | 0.07453216 | 2.65E-18 |
| YY1AP1     | -0.2034082 | 2.66E-18 |
| GDE1       | 0.03062698 | 2.69E-18 |
| MTFR1      | 0.08069893 | 2.71E-18 |
| DIP2A      | 0.10305133 | 2.72E-18 |
| GTPBP4     | -0.253799  | 2.75E-18 |
| FADS2      | 0.08123571 | 2.77E-18 |
| ATG12      | 0.22145592 | 2.79E-18 |
| RRP1       | 0.06713597 | 2.81E-18 |
| GDI2       | 0.34120762 | 2.83E-18 |
| FXN        | 0.13106925 | 2.83E-18 |

|            |            |          |
|------------|------------|----------|
| AC106791.1 | 0.13193702 | 2.85E-18 |
| TRMT10B    | 0.15061956 | 2.86E-18 |
| AUH        | 0.07285387 | 2.87E-18 |
| H2AFY2     | 0.09932133 | 2.90E-18 |
| RAD23B     | 0.12999206 | 2.94E-18 |
| MAP3K5     | 0.04183259 | 2.96E-18 |
| DNAJC11    | 0.06200161 | 3.03E-18 |
| MAPK12     | 0.11152621 | 3.07E-18 |
| C1orf131   | 0.11894189 | 3.10E-18 |
| MGST3      | -0.2420339 | 3.13E-18 |
| AUXG01000  | 0.11626061 | 3.13E-18 |
| ZNF280D    | 0.20292459 | 3.14E-18 |
| GINM1      | -0.2406146 | 3.15E-18 |
| METTL2B    | 0.09769739 | 3.17E-18 |
| LDLRAD4    | 0.15477765 | 3.18E-18 |
| MTRF1      | 0.10098449 | 3.18E-18 |
| MRPS10     | 0.07225329 | 3.19E-18 |
| AC108519.1 | 0.10270129 | 3.22E-18 |
| NDUFA5     | 0.11113131 | 3.22E-18 |
| TMEM60     | 0.1196011  | 3.23E-18 |
| PNKP       | -0.1404021 | 3.26E-18 |
| MIR4435-2H | -0.1835854 | 3.27E-18 |
| FKTN       | 0.10977068 | 3.29E-18 |
| BCKDHA     | 0.11921824 | 3.30E-18 |
| CPSF4      | 0.06203357 | 3.31E-18 |
| HACL1      | 0.09880224 | 3.31E-18 |
| COPS5      | 0.1430862  | 3.34E-18 |
| UCHL5      | 0.16099237 | 3.39E-18 |
| NT5C3B     | 0.08111403 | 3.41E-18 |
| NXPE3      | 0.11052167 | 3.46E-18 |
| PAGR1      | 0.01536438 | 3.46E-18 |
| PPP1CC     | -0.0089989 | 3.46E-18 |
| AC083798.2 | 0.07950013 | 3.48E-18 |
| CTBP1      | 0.25869751 | 3.49E-18 |
| CXorf56    | 0.029139   | 3.55E-18 |
| MRPS30     | 0.1777208  | 3.67E-18 |
| MPST       | 0.17646731 | 3.68E-18 |
| NR2C1      | 0.01850097 | 3.68E-18 |
| UTP6       | 0.19043051 | 3.70E-18 |
| MRTO4      | 0.16525594 | 3.72E-18 |
| AGFG1      | 0.07454774 | 3.73E-18 |
| ZCCHC8     | 0.03519561 | 3.73E-18 |
| AC093627.4 | 0.06698832 | 3.74E-18 |
| MRPL44     | -0.0176934 | 3.75E-18 |
| C3         | 0.10275865 | 3.84E-18 |
| GABARAPL2  | 0.21257421 | 3.90E-18 |
| AL359504.2 | 0.08568601 | 3.91E-18 |
| CCDC30     | 0.14192275 | 3.93E-18 |
| MOSMO      | 0.10631819 | 3.94E-18 |
| CLK1       | -0.3031525 | 4.00E-18 |

|            |            |          |
|------------|------------|----------|
| CLN5       | 0.08480553 | 4.01E-18 |
| C19orf25   | -0.0335185 | 4.06E-18 |
| RAB37      | 0.20342287 | 4.08E-18 |
| FAM120AOS  | -0.1064731 | 4.11E-18 |
| POMGNT1    | 0.06184018 | 4.13E-18 |
| DDX56      | -0.0605702 | 4.18E-18 |
| EXOC4      | 0.07621785 | 4.21E-18 |
| TMEM165    | 0.13290902 | 4.24E-18 |
| SURF1      | -0.0001133 | 4.28E-18 |
| STOML2     | -0.0210417 | 4.29E-18 |
| CALHM2     | -0.2075263 | 4.31E-18 |
| CCNK       | -0.1305215 | 4.33E-18 |
| CERK       | -0.1180696 | 4.34E-18 |
| ELP1       | 0.0916707  | 4.35E-18 |
| CHD4       | 0.32139124 | 4.37E-18 |
| KMT2B      | 0.07663759 | 4.38E-18 |
| MRPL10     | -0.1451578 | 4.38E-18 |
| COL9A2     | 0.07858497 | 4.48E-18 |
| GNL3       | 0.1758943  | 4.50E-18 |
| SLC6A6     | -0.2055884 | 4.50E-18 |
| TYW1       | 0.11290916 | 4.55E-18 |
| GTF3C1     | -0.0082427 | 4.57E-18 |
| HEATR5B    | -0.1104767 | 4.59E-18 |
| RFX7       | 0.08038592 | 4.63E-18 |
| AHCY       | 0.00216558 | 4.67E-18 |
| AL138963.4 | 0.06393578 | 4.67E-18 |
| MOK        | -0.1687636 | 4.68E-18 |
| YTHDF3     | 0.01556108 | 4.68E-18 |
| EIF4E      | -0.1260542 | 4.76E-18 |
| RSRC1      | 0.18533739 | 4.77E-18 |
| ZNF566     | 0.14556732 | 4.79E-18 |
| IFT20      | -0.0831466 | 4.80E-18 |
| EFR3A      | -0.040349  | 4.83E-18 |
| CHTOP      | -0.0492089 | 4.85E-18 |
| TMEM156    | 0.14316975 | 4.85E-18 |
| P4HA1      | 0.19888219 | 4.93E-18 |
| ARID2      | 0.02777836 | 4.95E-18 |
| SUCNR1     | 0.41617177 | 4.97E-18 |
| RASAL3     | 0.16550579 | 5.00E-18 |
| ATP5MPL    | 0.33555147 | 5.03E-18 |
| SLC29A1    | 0.12363313 | 5.05E-18 |
| AASDHPPT   | 0.02021863 | 5.11E-18 |
| AGO1       | 0.12497327 | 5.13E-18 |
| ARCN1      | -0.0235499 | 5.19E-18 |
| MAF1       | -0.1411756 | 5.21E-18 |
| TNFAIP8L1  | -0.1286218 | 5.23E-18 |
| AC138150.1 | 0.10681893 | 5.24E-18 |
| PLD3       | -0.1178028 | 5.26E-18 |
| ALDH9A1    | 0.03511962 | 5.27E-18 |
| FAM50B     | 0.062639   | 5.29E-18 |

|            |            |          |
|------------|------------|----------|
| NOTCH1     | -0.2419003 | 5.31E-18 |
| ALG11      | 0.09709956 | 5.33E-18 |
| UAP1       | -0.0452793 | 5.36E-18 |
| STXBP3     | 0.20051266 | 5.36E-18 |
| USO1       | 0.21241832 | 5.41E-18 |
| MARCH3     | 0.11726063 | 5.47E-18 |
| SNX13      | 0.05197226 | 5.53E-18 |
| PDHX       | -0.0053278 | 5.55E-18 |
| GPN1       | -0.0342716 | 5.70E-18 |
| CCS        | -0.0899174 | 5.71E-18 |
| AP2B1      | 0.09471519 | 5.73E-18 |
| WARS2-AS1  | 0.10714477 | 5.77E-18 |
| C6orf62    | 0.1511343  | 5.82E-18 |
| SAP30BP    | -0.2048105 | 5.82E-18 |
| ATP8B2     | -0.2342259 | 5.94E-18 |
| TMEM220    | 0.19241002 | 6.08E-18 |
| TNPO3      | -0.0396606 | 6.10E-18 |
| USP28      | 0.11013653 | 6.12E-18 |
| TRMT61B    | 0.0605163  | 6.41E-18 |
| DNASE2     | 0.12352168 | 6.46E-18 |
| SUPT20H    | 0.15519476 | 6.52E-18 |
| AHCYL1     | 0.16790245 | 6.53E-18 |
| C3orf38    | 0.00411355 | 6.54E-18 |
| AC060780.1 | 0.2265475  | 6.60E-18 |
| CASP2      | 0.17725095 | 6.65E-18 |
| LENG1      | -0.1011314 | 6.71E-18 |
| ITPRID2    | -0.2580989 | 6.72E-18 |
| SHISA5     | -0.0875448 | 6.87E-18 |
| CIITA      | 0.2098754  | 6.88E-18 |
| C16orf87   | 0.08628148 | 6.98E-18 |
| C1RL       | 0.10798558 | 7.10E-18 |
| PTGER2     | -0.2551558 | 7.22E-18 |
| RCOR1      | 0.07581485 | 7.39E-18 |
| DHX33      | 0.14184276 | 7.50E-18 |
| NUP50      | 0.0397835  | 7.51E-18 |
| RNF19A     | -0.2075167 | 7.55E-18 |
| CBLB       | -0.2060866 | 7.61E-18 |
| RIOK2      | 0.05391701 | 7.62E-18 |
| TGIF1      | 5.9487E-05 | 7.67E-18 |
| HMGXB4     | -0.136771  | 7.79E-18 |
| GNPTAB     | 0.3400728  | 7.80E-18 |
| SLC43A2    | -0.3030415 | 7.84E-18 |
| CKAP5      | 0.10046525 | 7.94E-18 |
| MED27      | -0.0568558 | 7.96E-18 |
| IK         | -0.0011118 | 7.98E-18 |
| PHYKPL     | -0.162003  | 8.08E-18 |
| SCAMP4     | -0.0271268 | 8.13E-18 |
| NQO2       | 0.04524015 | 8.15E-18 |
| UBE2W      | 0.06686307 | 8.16E-18 |
| KDM3B      | 0.10227171 | 8.21E-18 |

|            |            |          |
|------------|------------|----------|
| UFD1       | -0.0272735 | 8.22E-18 |
| MRPL21     | -0.1274457 | 8.23E-18 |
| ATXN2L     | -0.0313136 | 8.24E-18 |
| TALDO1     | 0.29881937 | 8.25E-18 |
| ADAMTSL4   | -0.2222042 | 8.39E-18 |
| GPS2       | 0.09326814 | 8.42E-18 |
| EMC8       | -0.1703719 | 8.44E-18 |
| CPD        | 0.11253425 | 8.50E-18 |
| SNAP23     | 0.22044044 | 8.87E-18 |
| NSMCE1     | 0.09534531 | 8.91E-18 |
| MR1        | 0.09538074 | 8.93E-18 |
| NBAS       | 0.0748058  | 8.94E-18 |
| LRRC8A     | -0.2979917 | 8.96E-18 |
| DGKA       | -0.2389339 | 9.11E-18 |
| PDHB       | 0.03747842 | 9.12E-18 |
| BAD        | 0.03317902 | 9.14E-18 |
| ZNF746     | 0.01570632 | 9.32E-18 |
| CEP76      | 0.10699964 | 9.44E-18 |
| C12orf10   | -0.1485279 | 9.49E-18 |
| AC025171.2 | 0.22665257 | 9.53E-18 |
| FANCF      | 0.08532842 | 9.54E-18 |
| TMEM131L   | -0.2173726 | 9.54E-18 |
| FAAP20     | -0.0264889 | 9.66E-18 |
| ZBTB1      | 0.15547187 | 9.68E-18 |
| WEE1       | -0.2157368 | 9.73E-18 |
| COQ9       | 0.0681723  | 9.77E-18 |
| TRPC4AP    | -0.1250034 | 9.83E-18 |
| COL4A5     | 0.16629609 | 9.87E-18 |
| AL499604.1 | 0.07728617 | 1.01E-17 |
| ZMAT3      | 0.10478971 | 1.02E-17 |
| PHF1       | -0.1704464 | 1.02E-17 |
| KIAA1586   | 0.09835586 | 1.03E-17 |
| PRKX       | 0.04494007 | 1.04E-17 |
| STOM       | -0.2308605 | 1.05E-17 |
| CD99L2     | 0.08017717 | 1.05E-17 |
| DAZAP2     | 0.18603366 | 1.06E-17 |
| PCBP1      | 0.24431065 | 1.07E-17 |
| MCM6       | -0.0433094 | 1.07E-17 |
| CCDC71L    | -0.0731832 | 1.07E-17 |
| PNPO       | 0.06218081 | 1.08E-17 |
| CPSF3      | 0.13057602 | 1.09E-17 |
| MPV17      | 0.10866761 | 1.09E-17 |
| MOB4       | -0.0592753 | 1.10E-17 |
| MGLL       | 0.01088101 | 1.10E-17 |
| RGS16      | 0.15837737 | 1.11E-17 |
| ATG4C      | 0.13728082 | 1.13E-17 |
| CCZ1       | -0.0075033 | 1.13E-17 |
| ADRB2      | 0.20717823 | 1.13E-17 |
| POLR2I     | 0.13654946 | 1.14E-17 |
| NDUFS2     | 0.19531461 | 1.16E-17 |



|           |            |          |
|-----------|------------|----------|
| TGFBR2    | -0.1335017 | 1.17E-17 |
| NCSTN     | 0.07859905 | 1.17E-17 |
| WBP11     | -0.2188635 | 1.17E-17 |
| TM4SF1    | -0.2358781 | 1.18E-17 |
| C20orf96  | 0.08345179 | 1.18E-17 |
| BTBD2     | 0.06325174 | 1.19E-17 |
| MAZ       | 0.27839034 | 1.20E-17 |
| CERS2     | 0.1608052  | 1.20E-17 |
| CRYL1     | 0.10944398 | 1.21E-17 |
| YIPF6     | -0.079047  | 1.22E-17 |
| PAQR3     | 0.08503764 | 1.23E-17 |
| NFIL3     | 0.14871603 | 1.23E-17 |
| MTX1      | -0.1396118 | 1.23E-17 |
| SPTLC1    | 0.10448359 | 1.23E-17 |
| SNRK      | -0.0463948 | 1.23E-17 |
| ANGEL2    | 0.18259623 | 1.24E-17 |
| TBC1D8    | 0.07082158 | 1.24E-17 |
| HSDL2     | 0.15587013 | 1.26E-17 |
| WDR46     | 0.09761397 | 1.27E-17 |
| CDK7      | 0.01064245 | 1.27E-17 |
| CSKMT     | 0.17927123 | 1.29E-17 |
| MAFK      | -0.1814283 | 1.30E-17 |
| PFDN1     | 0.08562171 | 1.30E-17 |
| MIS18A    | 0.10036956 | 1.31E-17 |
| NUP155    | 0.09618203 | 1.32E-17 |
| NFIC      | 0.22605435 | 1.34E-17 |
| PXK       | 0.25990186 | 1.35E-17 |
| GTPBP6    | 0.11631475 | 1.35E-17 |
| CDC42EP2  | -0.1459412 | 1.35E-17 |
| NKIRAS2   | -0.108147  | 1.35E-17 |
| NAGPA     | 0.09362442 | 1.35E-17 |
| DEF6      | -0.0385568 | 1.36E-17 |
| TAP1      | 0.00635639 | 1.37E-17 |
| ADGRG6    | 0.15833569 | 1.37E-17 |
| LSM14B    | -0.0228691 | 1.37E-17 |
| PLEKHA5   | 0.19504683 | 1.38E-17 |
| LINC01684 | 0.17425668 | 1.38E-17 |
| ORMDL1    | 0.33563991 | 1.38E-17 |
| PKD1      | 0.07768789 | 1.39E-17 |
| PXN       | -0.162602  | 1.41E-17 |
| SPPL3     | -0.1836573 | 1.41E-17 |
| S100PBP   | 0.16041297 | 1.43E-17 |
| EEF1A1    | -0.2558085 | 1.43E-17 |
| NTMT1     | -0.1218875 | 1.43E-17 |
| HK2       | 0.09667166 | 1.44E-17 |
| PAXX      | -0.0543782 | 1.45E-17 |
| ZNF585A   | 0.05703916 | 1.45E-17 |
| PWWP2A    | 0.0963281  | 1.47E-17 |
| SF3B4     | -0.0930923 | 1.49E-17 |
| SLC35B3   | 0.12229535 | 1.53E-17 |

|             |            |          |
|-------------|------------|----------|
| MAP3K12     | 0.07927674 | 1.57E-17 |
| ATP6V1A     | -0.1670351 | 1.58E-17 |
| UPF2        | 0.28786267 | 1.59E-17 |
| ZNF91       | 0.23126145 | 1.59E-17 |
| EBPL        | 0.26922426 | 1.59E-17 |
| ZNF346      | 0.05719883 | 1.60E-17 |
| ARPP19      | -0.2639029 | 1.60E-17 |
| ZNF667-AS1  | -0.0919715 | 1.61E-17 |
| EIF2AK4     | 0.14305006 | 1.61E-17 |
| HSPB1       | -0.2639556 | 1.62E-17 |
| RCBTB1      | 0.15478139 | 1.62E-17 |
| RAD54L2     | 0.04206881 | 1.63E-17 |
| MRPS14      | 0.04515367 | 1.65E-17 |
| INTS13      | 0.11040141 | 1.66E-17 |
| FAM222B     | -0.0901272 | 1.68E-17 |
| TMEM42      | 0.14941703 | 1.72E-17 |
| HDLBP       | 0.16471442 | 1.76E-17 |
| DMAC2L      | 0.19511496 | 1.76E-17 |
| ZSCAN16-AS1 | 0.22022797 | 1.80E-17 |
| ABHD17B     | 0.06164458 | 1.83E-17 |
| SOX12       | 0.09761862 | 1.84E-17 |
| KIAA2013    | 0.12674638 | 1.87E-17 |
| PSMB9       | -0.0486252 | 1.88E-17 |
| TXNDC12     | 0.1600748  | 1.88E-17 |
| NSMCE4A     | 0.02460034 | 1.89E-17 |
| DFFB        | 0.10397506 | 1.90E-17 |
| AC004540.1  | 0.12281927 | 1.91E-17 |
| PLSCR1      | -0.0034995 | 1.92E-17 |
| SPECC1      | 0.21054162 | 1.94E-17 |
| LTBP3       | -0.1852152 | 1.95E-17 |
| COPA        | -0.1661254 | 1.96E-17 |
| RPS6KA4     | -0.1128405 | 1.97E-17 |
| FAM136A     | 0.19037508 | 1.98E-17 |
| SNX19       | 0.04136277 | 1.98E-17 |
| MYDGF       | -0.0917016 | 1.99E-17 |
| MBNL3       | 0.16032807 | 2.00E-17 |
| ZNF598      | -0.155901  | 2.00E-17 |
| CCDC106     | 0.09545263 | 2.02E-17 |
| MFAP1       | -0.1312312 | 2.03E-17 |
| PPP1R7      | 0.11338914 | 2.03E-17 |
| ATP6AP2     | 0.07311831 | 2.04E-17 |
| DYRK3       | -0.2716847 | 2.06E-17 |
| KIAA1958    | 0.15465299 | 2.08E-17 |
| DDX23       | 0.16341738 | 2.11E-17 |
| SNX27       | 0.11068402 | 2.14E-17 |
| XPO5        | 0.10488649 | 2.14E-17 |
| CFL2        | 0.10403856 | 2.16E-17 |
| EPHB6       | 0.09914491 | 2.17E-17 |
| TMEM258     | 0.27936667 | 2.21E-17 |
| SLC2A4RG    | 0.13429902 | 2.22E-17 |

|            |            |          |
|------------|------------|----------|
| UIMC1      | -0.1308326 | 2.24E-17 |
| PSMA4      | 0.25763454 | 2.24E-17 |
| TTBK2      | 0.17395663 | 2.24E-17 |
| TGFBR1     | -0.1632704 | 2.26E-17 |
| RPL11      | 0.16235664 | 2.27E-17 |
| GMPR2      | 0.13919585 | 2.29E-17 |
| RPL7A      | -0.2288007 | 2.29E-17 |
| CRLF3      | 0.07538147 | 2.29E-17 |
| GEMIN6     | 0.11023323 | 2.29E-17 |
| MCUR1      | 0.05649275 | 2.30E-17 |
| DAP3       | 0.08526021 | 2.30E-17 |
| FTSJ3      | 0.10189577 | 2.31E-17 |
| ADAM10     | 0.17420268 | 2.32E-17 |
| CD63       | -0.3128594 | 2.32E-17 |
| NR2C2      | 0.01205595 | 2.32E-17 |
| HIST1H4E   | 0.1565309  | 2.33E-17 |
| SUPT5H     | 0.03629234 | 2.33E-17 |
| TM2D1      | 0.18029333 | 2.34E-17 |
| ALDH3A2    | 0.10138739 | 2.36E-17 |
| PSMB6      | -0.13957   | 2.36E-17 |
| TFB2M      | -0.0388409 | 2.37E-17 |
| CSNK1G3    | -0.1670012 | 2.37E-17 |
| VAMP5      | 0.14163567 | 2.40E-17 |
| AFF4       | -0.1620474 | 2.40E-17 |
| AC012615.1 | 0.06514685 | 2.40E-17 |
| PPFIBP1    | 0.08239513 | 2.41E-17 |
| CASD1      | 0.0907238  | 2.41E-17 |
| IFNAR2     | 0.14940751 | 2.42E-17 |
| CFLAR      | 0.33904266 | 2.44E-17 |
| MCRIP1     | -0.1418618 | 2.45E-17 |
| SF3A3      | 0.05076501 | 2.47E-17 |
| VAPA       | -0.3585618 | 2.50E-17 |
| C11orf1    | 0.17290293 | 2.50E-17 |
| ARRB1      | 0.22028307 | 2.52E-17 |
| ASH2L      | 0.12419974 | 2.53E-17 |
| ZADH2      | 0.08511201 | 2.54E-17 |
| GPATCH4    | 0.21632522 | 2.55E-17 |
| DESI2      | -0.0981696 | 2.56E-17 |
| SLC25A39   | -0.1050769 | 2.57E-17 |
| LACTB      | -0.1862526 | 2.61E-17 |
| DBT        | 0.17036883 | 2.72E-17 |
| KLHL9      | -0.0705902 | 2.72E-17 |
| SIPA1      | 0.05699067 | 2.72E-17 |
| C7orf50    | 0.1160351  | 2.76E-17 |
| CLNS1A     | 0.3062549  | 2.76E-17 |
| MRPL28     | -0.034205  | 2.81E-17 |
| TSR1       | 0.10731689 | 2.85E-17 |
| NADK2      | 0.13553278 | 2.89E-17 |
| HSF1       | -0.1343543 | 2.91E-17 |
| ARRDC2     | -0.1963049 | 2.91E-17 |

|            |            |          |
|------------|------------|----------|
| DBNL       | -0.0852171 | 2.94E-17 |
| RNPC3      | 0.19101141 | 2.96E-17 |
| PPID       | 0.15557067 | 2.98E-17 |
| PHKG2      | 0.05961416 | 3.00E-17 |
| FUT4       | 0.15075675 | 3.00E-17 |
| CHMP2A     | -0.1976796 | 3.08E-17 |
| RASSF5     | -0.1385004 | 3.08E-17 |
| ITGB2      | -0.2701459 | 3.12E-17 |
| NUP58      | -0.0082618 | 3.12E-17 |
| TMEM230    | 0.20508584 | 3.15E-17 |
| HARS       | -0.000572  | 3.16E-17 |
| B3GAT3     | -0.0456169 | 3.16E-17 |
| SAT2       | 0.01567687 | 3.17E-17 |
| LIME1      | -0.284138  | 3.21E-17 |
| ZRANB1     | -0.1696187 | 3.22E-17 |
| WDR83      | 0.06294583 | 3.23E-17 |
| TMEM170B   | 0.09438521 | 3.25E-17 |
| SLC11A2    | 0.0674253  | 3.27E-17 |
| CREB3L2    | 0.12750408 | 3.31E-17 |
| ZDHHC2     | 0.09376586 | 3.32E-17 |
| LSM4       | 0.0502598  | 3.35E-17 |
| HPS6       | -0.0786214 | 3.38E-17 |
| AC015802.6 | 0.08488573 | 3.41E-17 |
| VSIG10     | 0.03406707 | 3.41E-17 |
| VWF        | 0.32999698 | 3.44E-17 |
| TSFM       | 0.04868088 | 3.44E-17 |
| EFCAB14    | 0.16989442 | 3.45E-17 |
| NEK7       | 0.09622174 | 3.47E-17 |
| NDUFV1     | -0.1323811 | 3.49E-17 |
| UQCC3      | 0.08066175 | 3.53E-17 |
| ALKBH5     | 0.09046522 | 3.55E-17 |
| RO60       | -0.0874499 | 3.58E-17 |
| AL022311.1 | 0.01349357 | 3.61E-17 |
| FRYL       | 0.12754209 | 3.62E-17 |
| PPM1H      | 0.11586438 | 3.63E-17 |
| RNF135     | 0.07616757 | 3.64E-17 |
| COPZ1      | -0.0626944 | 3.65E-17 |
| MAP3K1     | -0.2445479 | 3.66E-17 |
| SMPD2      | -0.1667492 | 3.68E-17 |
| RCHY1      | -0.1330317 | 3.70E-17 |
| ICAM2      | -0.1699702 | 3.87E-17 |
| ZNF830     | 0.21060088 | 3.88E-17 |
| ZNF333     | 0.05392392 | 3.90E-17 |
| STT3A      | 0.11561908 | 3.90E-17 |
| ZNF414     | -0.1400228 | 3.90E-17 |
| TOR1A      | 0.04094501 | 3.91E-17 |
| CYP4V2     | 0.09280725 | 3.93E-17 |
| CCDC90B    | 0.03585528 | 3.94E-17 |
| GPN3       | 0.04708852 | 3.99E-17 |
| EXOC2      | 0.09325791 | 4.03E-17 |

|             |            |          |
|-------------|------------|----------|
| TARS        | -0.1182525 | 4.04E-17 |
| RPL26L1     | 0.13035008 | 4.09E-17 |
| HEMK1       | 0.10969733 | 4.11E-17 |
| CMPK2       | 0.11698144 | 4.13E-17 |
| WDR74       | 0.0910495  | 4.15E-17 |
| C5orf63     | 0.1181828  | 4.20E-17 |
| C21orf62-AS | 0.12944998 | 4.21E-17 |
| TBC1D15     | -0.1492884 | 4.21E-17 |
| HIVEP1      | -0.2920864 | 4.27E-17 |
| RPL24       | 0.17697574 | 4.30E-17 |
| HERC4       | 0.22303149 | 4.31E-17 |
| DLG5        | 0.05960062 | 4.32E-17 |
| BMF         | -0.1699014 | 4.32E-17 |
| BUB3        | 0.11446205 | 4.37E-17 |
| PPP2R2D     | 0.00518974 | 4.39E-17 |
| CNOT9       | -0.0923263 | 4.43E-17 |
| C14orf119   | -0.0667592 | 4.45E-17 |
| TRPT1       | 0.12759187 | 4.46E-17 |
| CRKL        | -0.0588665 | 4.46E-17 |
| ATG16L2     | 0.05319809 | 4.49E-17 |
| PLEKHA2     | -0.0835368 | 4.49E-17 |
| TPP1        | 0.12262112 | 4.52E-17 |
| SON         | 0.24771987 | 4.53E-17 |
| HPF1        | 0.18290226 | 4.58E-17 |
| OSCAR       | -0.2002884 | 4.66E-17 |
| CCP110      | -0.0055511 | 4.68E-17 |
| ANKRD17     | 0.20042258 | 4.68E-17 |
| FAM76A      | -0.1646215 | 4.69E-17 |
| ADO         | 0.03773414 | 4.71E-17 |
| CSNK1E      | -0.1030229 | 4.83E-17 |
| PPP2CB      | -0.1033395 | 4.83E-17 |
| MAP10       | 0.07208945 | 4.84E-17 |
| RHBDF2      | -0.2313485 | 4.91E-17 |
| CCDC61      | 0.05446678 | 4.91E-17 |
| SERGEF      | 0.06513876 | 4.92E-17 |
| PIGL        | 0.06794535 | 4.92E-17 |
| RAF1        | -0.0690791 | 4.94E-17 |
| MORC2       | 0.1858589  | 4.96E-17 |
| DNAJC4      | -0.0113909 | 5.03E-17 |
| SEPHS2      | 0.12184654 | 5.03E-17 |
| NUP160      | 0.04874038 | 5.05E-17 |
| MZT1        | 0.07199507 | 5.10E-17 |
| MAPK6       | 0.09824411 | 5.17E-17 |
| MCM4        | -0.0300262 | 5.17E-17 |
| PLIN3       | -0.2369003 | 5.17E-17 |
| MIIP        | 0.06206574 | 5.19E-17 |
| CFAP97      | 0.2282173  | 5.19E-17 |
| AC005332.6  | 0.06686327 | 5.20E-17 |
| C17orf80    | 0.09566188 | 5.24E-17 |
| CTU1        | 0.00236809 | 5.24E-17 |

|           |            |          |
|-----------|------------|----------|
| PRSS21    | -0.1624209 | 5.29E-17 |
| SLC35E3   | 0.20890993 | 5.32E-17 |
| POLR1A    | 0.10270315 | 5.33E-17 |
| KCMF1     | -0.2494449 | 5.34E-17 |
| BRD9      | -0.0103453 | 5.35E-17 |
| MKRN1     | -0.1203428 | 5.36E-17 |
| PINK1     | 0.0547981  | 5.37E-17 |
| TM9SF1    | -0.1067748 | 5.38E-17 |
| C19orf48  | -0.0079314 | 5.39E-17 |
| SERTAD2   | -0.1434673 | 5.40E-17 |
| NUP85     | 0.07578868 | 5.43E-17 |
| SERINC5   | 0.1546483  | 5.46E-17 |
| UTP20     | 0.14881254 | 5.46E-17 |
| DHRS7B    | 0.05588463 | 5.52E-17 |
| POC5      | 0.11458725 | 5.53E-17 |
| SELENOO   | -0.0092056 | 5.62E-17 |
| SCO2      | -0.1367031 | 5.64E-17 |
| RDH14     | -0.0520074 | 5.69E-17 |
| RANBP6    | 0.11562529 | 5.69E-17 |
| SPON2     | -0.1319138 | 5.75E-17 |
| PSMD14    | -0.0901895 | 5.75E-17 |
| TTC32     | 0.10154485 | 5.79E-17 |
| PPP1R9B   | 0.02645237 | 5.83E-17 |
| ATP5PF    | 0.27802891 | 5.84E-17 |
| GYG1      | 0.00868273 | 5.96E-17 |
| ALKBH2    | 0.09522968 | 5.97E-17 |
| MARC2     | 0.07125261 | 6.03E-17 |
| ASXL2     | 0.07829559 | 6.03E-17 |
| TIMM23    | -0.1074313 | 6.05E-17 |
| CLN8      | -0.1607016 | 6.06E-17 |
| EDEM2     | 0.1198707  | 6.09E-17 |
| NUTM2A-AS | 0.17347483 | 6.12E-17 |
| PPP2R5D   | 0.05974913 | 6.14E-17 |
| THOC6     | 0.10058877 | 6.25E-17 |
| IL4I1     | -0.1592196 | 6.25E-17 |
| NELFB     | -0.0049584 | 6.32E-17 |
| RBCK1     | -0.1397994 | 6.32E-17 |
| DGKE      | 0.19589327 | 6.36E-17 |
| SAR1B     | 0.06391213 | 6.37E-17 |
| OSBPL5    | 0.09785951 | 6.40E-17 |
| RTCB      | -0.0626774 | 6.43E-17 |
| USP39     | 0.03149524 | 6.45E-17 |
| RCC1      | 0.06203394 | 6.49E-17 |
| CDKL3     | 0.07627298 | 6.52E-17 |
| FAM92A    | 0.12093486 | 6.57E-17 |
| RFFL      | 0.06621901 | 6.61E-17 |
| GIGYF1    | 0.04292768 | 6.66E-17 |
| B9D2      | -0.1446241 | 6.66E-17 |
| MSRA      | -0.0615231 | 6.73E-17 |
| CUL4B     | 0.14256523 | 6.78E-17 |

|            |            |          |
|------------|------------|----------|
| TMTC4      | 0.04273588 | 6.85E-17 |
| COA5       | 0.11023509 | 6.86E-17 |
| NLRP2      | 0.06972265 | 6.90E-17 |
| STRADB     | 0.10166111 | 7.03E-17 |
| AL355488.1 | 0.07420886 | 7.17E-17 |
| BTN3A1     | 0.07912014 | 7.22E-17 |
| SLC30A1    | -0.2138863 | 7.26E-17 |
| INTS3      | 0.04286374 | 7.29E-17 |
| DNAH14     | 0.13459639 | 7.34E-17 |
| CCDC58     | 0.1149338  | 7.36E-17 |
| SIPA1L3    | 0.10864025 | 7.36E-17 |
| AC009107.2 | 0.04563396 | 7.49E-17 |
| EIF4A3     | 0.06279136 | 7.49E-17 |
| RPS6KA5    | -0.2703403 | 7.55E-17 |
| SLC30A7    | 0.09029228 | 7.55E-17 |
| KHSRP      | 0.14256534 | 7.67E-17 |
| ALKBH7     | 0.36222556 | 7.67E-17 |
| UBXN6      | -0.0230023 | 7.73E-17 |
| MBTD1      | 0.14365136 | 7.73E-17 |
| LINC00909  | 0.17760322 | 7.80E-17 |
| SLC30A6    | 0.07953169 | 7.81E-17 |
| EIF2D      | 0.01702263 | 7.89E-17 |
| RFX8       | 0.08906864 | 7.95E-17 |
| CARD9      | 0.11222223 | 7.97E-17 |
| UPK3BL1    | 0.00034121 | 8.13E-17 |
| RRS1       | 0.13726386 | 8.13E-17 |
| TRRAP      | 0.11112437 | 8.16E-17 |
| ASB16-AS1  | 0.09007626 | 8.28E-17 |
| SDE2       | -0.2197634 | 8.28E-17 |
| USP36      | -0.0809491 | 8.39E-17 |
| PCIF1      | -0.2406183 | 8.46E-17 |
| CDADC1     | 0.12609881 | 8.47E-17 |
| OXLD1      | 0.01531825 | 8.68E-17 |
| AFMID      | 0.14199787 | 8.71E-17 |
| TOR2A      | -0.0438754 | 8.71E-17 |
| MTRES1     | 0.0536907  | 8.78E-17 |
| ZNF226     | 0.06288815 | 8.78E-17 |
| DUSP18     | -0.2347388 | 8.87E-17 |
| ERAP2      | 0.0925745  | 8.87E-17 |
| MYO15B     | -0.0954061 | 8.94E-17 |
| USP47      | -0.1828539 | 8.99E-17 |
| MGAT4A     | 0.05534209 | 9.04E-17 |
| ATXN3      | 0.11296062 | 9.07E-17 |
| FLI1       | 0.06059594 | 9.07E-17 |
| PRPF18     | 0.09124246 | 9.10E-17 |
| EIF2A      | 0.22459931 | 9.11E-17 |
| TNFSF14    | 0.07575928 | 9.15E-17 |
| NDUFS1     | 0.19765765 | 9.23E-17 |
| TBL1XR1    | 0.20484993 | 9.30E-17 |
| C12orf65   | -0.2036137 | 9.30E-17 |

|            |            |             |
|------------|------------|-------------|
| CDK14      | 0.12309234 | 9.32E-17    |
| TAPBP      | -0.2670678 | 9.32E-17    |
| DNAJC9     | -0.0579654 | 9.35E-17    |
| COPB2      | 0.03205804 | 9.36E-17    |
| MOSPD1     | 0.04710588 | 9.38E-17    |
| POLR2D     | 0.14393969 | 9.38E-17    |
| TRAPPC6A   | 0.09900673 | 9.50E-17    |
| ARNT       | 0.05570614 | 9.57E-17    |
| GET3       | -0.0091753 | 9.59E-17    |
| MARS       | -0.1773252 | 9.77E-17    |
| RPL22L1    | 0.36822357 | 9.86E-17    |
| PDIK1L     | 0.06976968 | 9.93E-17    |
| VAMP3      | -0.0945796 | 9.93E-17    |
| STRN4      | -0.1178589 | 1.00043E-16 |
| USP15      | -0.3244444 | 1.00578E-16 |
| WRN        | 0.13141102 | 1.01721E-16 |
| BCAP31     | -0.2365327 | 1.02264E-16 |
| SASH3      | -0.1057925 | 1.03538E-16 |
| UBA3       | 0.16468198 | 1.04603E-16 |
| TRAPPC8    | 0.01154945 | 1.0502E-16  |
| DNAJC21    | 0.22083412 | 1.07184E-16 |
| IREB2      | -0.0161584 | 1.07248E-16 |
| LMAN1      | 0.15604357 | 1.08942E-16 |
| SLC10A3    | -0.1497645 | 1.09854E-16 |
| CAP1       | -0.3227314 | 1.10262E-16 |
| CNPPD1     | -0.0635328 | 1.10329E-16 |
| TCP11L2    | -0.2909254 | 1.10462E-16 |
| TMEM87B    | 0.03135882 | 1.12842E-16 |
| EEA1       | 0.21741892 | 1.12911E-16 |
| NDUFA10    | 0.06842883 | 1.13102E-16 |
| AC036176.1 | 0.0577031  | 1.14016E-16 |
| TPST2      | -0.1831059 | 1.14183E-16 |
| MED6       | -0.1083777 | 1.14196E-16 |
| C19orf12   | -0.1291266 | 1.14764E-16 |
| PPP1CA     | -0.1546844 | 1.15922E-16 |
| PEF1       | -0.1961253 | 1.161E-16   |
| GLRX3      | 0.10577109 | 1.16423E-16 |
| GABPA      | 0.10274318 | 1.16762E-16 |
| GOPC       | 0.12398484 | 1.17411E-16 |
| BLOC1S4    | 0.00864722 | 1.18088E-16 |
| PAIP2      | -0.3411229 | 1.18986E-16 |
| PGBD4      | 0.1072056  | 1.19103E-16 |
| PTBP1      | 0.0220207  | 1.21907E-16 |
| PTMA       | 0.24871891 | 1.2232E-16  |
| WDR73      | -0.0956035 | 1.25719E-16 |
| UBE2Q2     | -0.2306744 | 1.28869E-16 |
| SLC35B1    | -0.1059468 | 1.30055E-16 |
| APEH       | 0.09783722 | 1.30253E-16 |
| BCL2L12    | 0.03806651 | 1.33574E-16 |
| TBC1D2B    | -0.0802371 | 1.33601E-16 |



|            |            |             |
|------------|------------|-------------|
| NDUFA9     | -0.0825037 | 1.34024E-16 |
| INPP4A     | -0.0482881 | 1.35535E-16 |
| MED21      | 0.12855842 | 1.35734E-16 |
| SNX20      | 0.05462602 | 1.35984E-16 |
| LCP2       | -0.0045349 | 1.36434E-16 |
| NUP98      | -0.1650544 | 1.37393E-16 |
| YWHAG      | -0.2618268 | 1.38027E-16 |
| CCDC115    | 0.10863049 | 1.39204E-16 |
| AC026471.1 | 0.05861392 | 1.39231E-16 |
| ELP2       | 0.1216542  | 1.40608E-16 |
| AC005562.1 | -0.0149206 | 1.42186E-16 |
| CFAP44     | 0.09393224 | 1.42573E-16 |
| CHMP4B     | 0.01613122 | 1.42782E-16 |
| TERF1      | 0.12472111 | 1.43021E-16 |
| PITPNA-AS1 | 0.01985326 | 1.44428E-16 |
| ATAD1      | -0.0032182 | 1.46183E-16 |
| SIRT7      | -0.0621453 | 1.46445E-16 |
| SFT2D3     | 0.04971294 | 1.47088E-16 |
| GPSM1      | -0.1513654 | 1.47418E-16 |
| PLA2G4A    | -0.0884414 | 1.47531E-16 |
| TTC5       | 0.10922595 | 1.48268E-16 |
| TIMM13     | 0.24959047 | 1.4838E-16  |
| NNT-AS1    | 0.14678724 | 1.48865E-16 |
| TPT1-AS1   | 0.09810161 | 1.51691E-16 |
| ERF        | -0.255667  | 1.51856E-16 |
| TENT4B     | -0.0146265 | 1.53086E-16 |
| SLC2A3     | -0.2950955 | 1.53963E-16 |
| SMARCA5    | 0.25970332 | 1.55101E-16 |
| CEPT1      | 0.08998547 | 1.57753E-16 |
| SYMPK      | 0.02072501 | 1.58709E-16 |
| TTC28-AS1  | 0.10231907 | 1.59148E-16 |
| EBLN3P     | 0.12530791 | 1.59262E-16 |
| SCARB2     | -0.204654  | 1.62521E-16 |
| HDAC1      | 0.16201558 | 1.64268E-16 |
| LEMD3      | -0.0886608 | 1.64762E-16 |
| CHML       | 0.25073382 | 1.68008E-16 |
| RASA2      | -0.2176007 | 1.68144E-16 |
| CBR4       | 0.13085633 | 1.69798E-16 |
| BRCC3      | 0.12777948 | 1.70825E-16 |
| CDCA4      | -0.1628419 | 1.73027E-16 |
| CXXC1      | 0.11579858 | 1.73347E-16 |
| SLC17A5    | -0.1692437 | 1.74847E-16 |
| ANKRD10    | 0.0734108  | 1.79084E-16 |
| FBXO42     | -0.0192173 | 1.7962E-16  |
| DROSHA     | 0.06623665 | 1.79645E-16 |
| SENP5      | -0.0569881 | 1.7989E-16  |
| SOCS5      | 0.05814537 | 1.80744E-16 |
| GIMAP2     | 0.06007246 | 1.80931E-16 |
| TTLL3      | 0.00415128 | 1.8116E-16  |
| GOLGA8A    | 0.10881629 | 1.81301E-16 |

|           |            |             |
|-----------|------------|-------------|
| TXLNG     | 0.05051185 | 1.82556E-16 |
| TLNRD1    | -0.1827147 | 1.84342E-16 |
| HADHB     | 0.04918564 | 1.85191E-16 |
| RETREG2   | 0.11771108 | 1.86927E-16 |
| LEO1      | 0.02814103 | 1.88321E-16 |
| ZBTB38    | 0.13290338 | 1.8885E-16  |
| TLK2      | -0.0110324 | 1.90108E-16 |
| MRPL9     | -0.0494898 | 1.90744E-16 |
| DKC1      | 0.22556759 | 1.93553E-16 |
| C12orf29  | 0.11475695 | 1.94618E-16 |
| PRRC2A    | 0.04998571 | 1.94673E-16 |
| FAM219B   | -0.1550321 | 1.94742E-16 |
| ACO2      | -0.0087163 | 1.95275E-16 |
| TAGAP     | -0.1350771 | 1.96475E-16 |
| RAB5C     | -0.2444686 | 1.97259E-16 |
| SAC3D1    | 0.13545862 | 1.98218E-16 |
| HAUS4     | 0.0333947  | 1.99837E-16 |
| SUPT7L    | -0.0760341 | 2.00175E-16 |
| RAB1B     | -0.0452366 | 2.0252E-16  |
| LRRRC41   | -0.0352931 | 2.0376E-16  |
| PLEKHH3   | -0.1618151 | 2.04939E-16 |
| RPE       | 0.10864172 | 2.06629E-16 |
| POLR2B    | -0.0623001 | 2.08032E-16 |
| PAN3-AS1  | 0.14257006 | 2.09324E-16 |
| DDX19A    | 0.07434368 | 2.09586E-16 |
| CASP7     | -0.1565091 | 2.11941E-16 |
| BACE1-AS  | 0.08912617 | 2.12847E-16 |
| SPRTN     | 0.07291879 | 2.13029E-16 |
| SGPL1     | -0.1480652 | 2.15326E-16 |
| ERVK13-1  | 0.04993084 | 2.16128E-16 |
| DRG1      | -0.0053769 | 2.18395E-16 |
| LINC02693 | 0.07255777 | 2.20788E-16 |
| RAD51-AS1 | 0.0956303  | 2.21201E-16 |
| EEFSEC    | 0.10274867 | 2.21421E-16 |
| MAP7D3    | 0.13849414 | 2.22385E-16 |
| VPS45     | 0.10169997 | 2.26794E-16 |
| DCUN1D4   | 0.03111362 | 2.27723E-16 |
| CCNC      | -0.0488208 | 2.28914E-16 |
| HINT3     | 0.08319856 | 2.29339E-16 |
| KDM5B     | -0.3669082 | 2.31759E-16 |
| FRA10AC1  | 0.15122497 | 2.32077E-16 |
| TMC3-AS1  | 0.07819651 | 2.36642E-16 |
| MRPL16    | 0.10043602 | 2.3784E-16  |
| PEX3      | 0.04307563 | 2.39196E-16 |
| MRPL41    | -0.0862053 | 2.40255E-16 |
| ZDHHC3    | 0.02442431 | 2.40565E-16 |
| CPNE3     | 0.2150852  | 2.41132E-16 |
| THAP4     | -0.0115183 | 2.43192E-16 |
| PUF60     | -0.1570228 | 2.43663E-16 |
| SERPINB1  | 0.35377559 | 2.46172E-16 |

|            |            |             |
|------------|------------|-------------|
| RASSF2     | -0.1351193 | 2.46718E-16 |
| SUZ12      | 0.1315651  | 2.51054E-16 |
| PARP8      | 0.03263057 | 2.51405E-16 |
| RLIM       | -0.2189729 | 2.54444E-16 |
| PAXIP1     | 0.06044301 | 2.5517E-16  |
| USP19      | 0.06751086 | 2.55232E-16 |
| SPIN1      | 0.14502845 | 2.5721E-16  |
| RNF10      | -0.2544743 | 2.59757E-16 |
| PAPSS1     | 0.09691034 | 2.61245E-16 |
| PRSS2      | -0.7246676 | 2.61487E-16 |
| FIP1L1     | -0.0922302 | 2.63782E-16 |
| ALG13      | 0.11841122 | 2.64126E-16 |
| ERICH1     | 0.15280777 | 2.65322E-16 |
| MRPS12     | 0.18503872 | 2.66465E-16 |
| TMED1      | -0.0533575 | 2.66583E-16 |
| GLTP       | -0.147258  | 2.6758E-16  |
| ANKIB1     | 0.13536276 | 2.69099E-16 |
| PPP1R8     | -0.0669048 | 2.73831E-16 |
| CNOT1      | -0.1103463 | 2.73961E-16 |
| DHX15      | -0.0671503 | 2.76733E-16 |
| MRPS18A    | -0.1273038 | 2.79163E-16 |
| CASC3      | 0.02192075 | 2.79851E-16 |
| NAF1       | 0.02378634 | 2.80332E-16 |
| TFDP1      | 0.08208455 | 2.81648E-16 |
| AC093673.1 | -0.1345516 | 2.81714E-16 |
| LETM1      | 0.07228694 | 2.81929E-16 |
| L2HGDH     | 0.11844394 | 2.82627E-16 |
| TBC1D20    | 0.02223437 | 2.89617E-16 |
| SMARCB1    | 0.03616815 | 2.89659E-16 |
| MRPL40     | 0.13693736 | 2.90697E-16 |
| ZNF639     | 0.06765057 | 2.91943E-16 |
| MAPKAPK5   | 0.03676948 | 2.94427E-16 |
| GUCY1B1    | 0.12651216 | 2.95208E-16 |
| SKP2       | 0.07858885 | 2.96424E-16 |
| TBRG4      | -0.0410986 | 2.97973E-16 |
| CNPY3      | -0.235001  | 2.97975E-16 |
| FAM91A1    | 0.00479607 | 3.0237E-16  |
| YBEY       | 0.06336426 | 3.03929E-16 |
| ZNF350     | -0.0079385 | 3.04193E-16 |
| LDAH       | 0.11643578 | 3.10921E-16 |
| TMED9      | -0.0530749 | 3.11573E-16 |
| C5orf15    | 0.0125614  | 3.12252E-16 |
| ZNF428     | -0.1126536 | 3.12652E-16 |
| LANCL1     | 0.035534   | 3.13091E-16 |
| MED8       | -0.149841  | 3.16909E-16 |
| FAM20B     | 0.13349045 | 3.17391E-16 |
| PHACTR1    | 0.15363785 | 3.19218E-16 |
| JAK1       | 0.16263668 | 3.22862E-16 |
| ZBTB11     | 0.00612653 | 3.25586E-16 |
| EIF2S1     | -0.1504777 | 3.27101E-16 |

|           |            |             |
|-----------|------------|-------------|
| ISCA1     | -0.0957329 | 3.27975E-16 |
| RP2       | -0.1507405 | 3.37261E-16 |
| CRK       | -0.2556508 | 3.3785E-16  |
| KAT14     | 0.10361379 | 3.39423E-16 |
| GPAA1     | -0.0820215 | 3.46493E-16 |
| PAQR7     | 0.08046927 | 3.50357E-16 |
| MPHOSPH10 | 0.1463003  | 3.52403E-16 |
| DEXI      | -0.0122114 | 3.54331E-16 |
| DPY19L2   | 0.13963926 | 3.56779E-16 |
| IL6R      | -0.1950104 | 3.58992E-16 |
| RABGEF1   | -0.2114532 | 3.62264E-16 |
| INAFM2    | 0.0928818  | 3.6571E-16  |
| METTL3    | 0.06407283 | 3.66419E-16 |
| GCNT1     | 0.22210206 | 3.66557E-16 |
| ZNF410    | -0.1475417 | 3.67296E-16 |
| ADNP2     | -0.2172654 | 3.70643E-16 |
| KLHL23    | 0.05596606 | 3.74845E-16 |
| CORO7     | -0.1785223 | 3.76813E-16 |
| ANGPTL6   | 0.07366121 | 3.79774E-16 |
| C5orf51   | 0.0298635  | 3.80227E-16 |
| LRG1      | 0.09786556 | 3.84477E-16 |
| CFAP298   | -0.0193124 | 3.86421E-16 |
| RRP1B     | 0.14307928 | 3.86443E-16 |
| TATDN1    | 0.22350815 | 3.93221E-16 |
| PACRGL    | 0.0847678  | 4.00607E-16 |
| CLK4      | -0.0713075 | 4.01673E-16 |
| HPS3      | 0.11767533 | 4.04599E-16 |
| RBM22     | -0.1205435 | 4.07432E-16 |
| WDTC1     | 0.0521769  | 4.07497E-16 |
| ACBD6     | 0.12052046 | 4.07826E-16 |
| SCFD1     | -0.1372464 | 4.09543E-16 |
| UBAP2L    | 0.08823441 | 4.1024E-16  |
| OTUD4     | -0.0390095 | 4.12886E-16 |
| SLC35F2   | 0.05808546 | 4.13624E-16 |
| PIWIL4    | 0.09817537 | 4.17419E-16 |
| RASA3     | 0.16302243 | 4.1823E-16  |
| HTATSF1   | -0.0963548 | 4.20679E-16 |
| TMEM9B    | -0.0092606 | 4.24039E-16 |
| NASP      | 0.19850689 | 4.24388E-16 |
| CISD2     | 0.12870178 | 4.34539E-16 |
| SIGMAR1   | 0.09904888 | 4.36102E-16 |
| RIC8A     | -0.1066197 | 4.37042E-16 |
| COPS3     | -0.1130556 | 4.38935E-16 |
| MACROD1   | 0.05901191 | 4.40659E-16 |
| ATG10     | 0.08668518 | 4.4698E-16  |
| SCHIP1    | 0.15248493 | 4.47942E-16 |
| PPP3R1    | -0.2425951 | 4.52229E-16 |
| GM2A      | 0.15545637 | 4.52581E-16 |
| GUF1      | 0.10373154 | 4.52697E-16 |
| LETMD1    | 0.11029028 | 4.54471E-16 |

|            |            |             |
|------------|------------|-------------|
| HSPA14.1   | 0.05796238 | 4.54521E-16 |
| RANBP2     | -0.2539788 | 4.5601E-16  |
| SLC25A33   | -0.0121418 | 4.62366E-16 |
| CEP170     | -0.2768373 | 4.62802E-16 |
| MED12L     | 0.10611221 | 4.65714E-16 |
| PPP4R2     | -0.2284523 | 4.69727E-16 |
| LARP4B     | 0.09836673 | 4.72101E-16 |
| RAB3GAP2   | -0.005836  | 4.7631E-16  |
| ANTKMT     | 0.04651767 | 4.81034E-16 |
| CAAP1      | 0.11002784 | 4.85174E-16 |
| RIOX2      | 0.17787535 | 4.86509E-16 |
| IRF3       | 0.1365526  | 4.87296E-16 |
| CHKA       | 0.078507   | 4.89265E-16 |
| VPS13B     | 0.11038712 | 4.91248E-16 |
| ACBD5      | 0.06667934 | 4.93294E-16 |
| AC245297.3 | 0.18514894 | 4.94011E-16 |
| ZNF766     | 0.14527599 | 4.96287E-16 |
| POLD2      | 0.09708823 | 4.98114E-16 |
| CLIP2      | -0.0741743 | 4.98505E-16 |
| GNPAT      | -0.0211632 | 4.99112E-16 |
| TMEM18     | 0.16712372 | 5.00147E-16 |
| PIP4P1     | -0.1394474 | 5.0185E-16  |
| PTGES2     | 0.00024864 | 5.04344E-16 |
| SLC52A2    | -0.0487569 | 5.0519E-16  |
| ATP9B      | 0.08750974 | 5.09368E-16 |
| ZNF260     | 0.09080998 | 5.10527E-16 |
| TEX10      | 0.08754466 | 5.14172E-16 |
| FHOD1      | -0.015937  | 5.14625E-16 |
| NOP2       | 0.07793534 | 5.20909E-16 |
| GCSAML     | 0.22065949 | 5.23908E-16 |
| GLG1       | 0.09807629 | 5.25836E-16 |
| DGKZ       | -0.127744  | 5.30692E-16 |
| CNIH4      | -0.1367355 | 5.37466E-16 |
| RAP1A      | -0.2616625 | 5.38992E-16 |
| PRPSAP2    | 0.05669918 | 5.41031E-16 |
| TMEM68     | 0.07961864 | 5.41693E-16 |
| PNPLA4     | 0.08274676 | 5.49285E-16 |
| RSPRY1     | -0.1216006 | 5.49759E-16 |
| ZBTB26     | 0.04253049 | 5.54675E-16 |
| FOXK1      | -0.0099557 | 5.55635E-16 |
| PEPD       | 0.07406672 | 5.56195E-16 |
| AC006504.5 | 0.12755866 | 5.60802E-16 |
| CEP162     | 0.17502582 | 5.61575E-16 |
| ATXN10     | 0.07803449 | 5.62529E-16 |
| KATNA1     | -0.1579643 | 5.66121E-16 |
| C1orf109   | 0.07758151 | 5.70138E-16 |
| TAPBPL     | -0.1676687 | 5.70894E-16 |
| SRP68      | -0.0232138 | 5.74727E-16 |
| TPD52L2    | -0.0319599 | 5.84387E-16 |
| CASC4      | 0.09813696 | 5.89359E-16 |

|            |            |             |
|------------|------------|-------------|
| C4orf46    | 0.08655594 | 5.90738E-16 |
| MCCC2      | 0.11332646 | 5.9092E-16  |
| USP20      | 0.07322946 | 5.9994E-16  |
| PHC2       | -0.039205  | 6.07919E-16 |
| HAUS3      | 0.08182413 | 6.07945E-16 |
| BAG2       | 0.11478479 | 6.09349E-16 |
| SLAIN2     | -0.0289775 | 6.09508E-16 |
| KAT6A      | -0.2305938 | 6.1404E-16  |
| MAP4       | -0.061268  | 6.21191E-16 |
| TBC1D10C   | -0.1221669 | 6.26974E-16 |
| ZNF587     | 0.09655416 | 6.53743E-16 |
| WAC-AS1    | 0.2257366  | 6.58195E-16 |
| VPS4A      | -0.075159  | 6.58225E-16 |
| TIMM10     | 0.02714123 | 6.63167E-16 |
| ZNF720     | 0.14295729 | 6.6602E-16  |
| TRIM24     | -0.0062911 | 6.68567E-16 |
| GALK1      | 0.07434895 | 6.68576E-16 |
| GAPVD1     | -0.0100386 | 6.69666E-16 |
| KDSR       | 0.13036936 | 6.74385E-16 |
| MRPS11     | 0.13052122 | 6.8979E-16  |
| FGFRL1     | 0.03418373 | 7.03177E-16 |
| CD164      | 0.3743306  | 7.04966E-16 |
| RALB       | -0.0817665 | 7.07985E-16 |
| RABL6      | 0.05661807 | 7.14116E-16 |
| DNMT3A     | 0.13567855 | 7.14801E-16 |
| MRPS16     | 0.00144485 | 7.16436E-16 |
| EVL        | -0.0828714 | 7.18901E-16 |
| ANKLE1     | 0.1034054  | 7.20659E-16 |
| SAP30L     | 0.01299559 | 7.26788E-16 |
| RHOQ       | -0.0990309 | 7.31587E-16 |
| CCDC82     | -0.1624481 | 7.3193E-16  |
| ATP11B     | -0.0755755 | 7.34354E-16 |
| CREB3      | -0.167579  | 7.38039E-16 |
| AL135925.1 | 0.07341328 | 7.39464E-16 |
| EPB41L4A-A | 0.20053677 | 7.39915E-16 |
| PGS1       | 0.10073393 | 7.40044E-16 |
| LARP1B     | 0.08589331 | 7.49427E-16 |
| PHACTR4    | 0.14065757 | 7.50223E-16 |
| AP2S1      | 0.04604549 | 7.58621E-16 |
| ADPRM      | 0.07409233 | 7.72641E-16 |
| C4orf48    | -0.2866492 | 7.73036E-16 |
| AC092329.4 | 0.02115051 | 7.75965E-16 |
| RB1CC1     | -0.282056  | 7.77167E-16 |
| ALG2       | -0.1375711 | 7.80505E-16 |
| DNAJB4     | 0.09534944 | 7.87304E-16 |
| BABAM1     | -0.0033417 | 7.91102E-16 |
| ILK        | -0.0414786 | 7.98229E-16 |
| RASSF1     | -0.0385537 | 8.03281E-16 |
| RAB11B     | -0.0570944 | 8.04048E-16 |
| SCAI       | 0.12824115 | 8.06581E-16 |

|           |            |             |
|-----------|------------|-------------|
| MED12     | 0.11377559 | 8.07966E-16 |
| TFE3      | -0.1013102 | 8.11888E-16 |
| GTF3C3    | 0.07263725 | 8.1316E-16  |
| ZNF519    | 0.0887622  | 8.14289E-16 |
| ATL2      | 0.11859864 | 8.19302E-16 |
| DEGS1     | -0.1665675 | 8.24176E-16 |
| ETFA      | 0.08319163 | 8.30682E-16 |
| PAICS     | 0.16644051 | 8.44966E-16 |
| ELK4      | 0.0197088  | 8.45685E-16 |
| MTMR9     | -0.1297285 | 8.51522E-16 |
| DCAF8     | 0.06325762 | 8.52196E-16 |
| BCAS2     | -0.1590043 | 8.54068E-16 |
| JARID2    | -0.1568585 | 8.55369E-16 |
| SEC22C    | -0.1643233 | 8.56587E-16 |
| RSAD2     | 0.09615348 | 8.59315E-16 |
| ELOF1     | -0.0860309 | 8.66549E-16 |
| SH3BP1    | -0.1356337 | 8.75557E-16 |
| NOA1      | 0.09736982 | 8.81235E-16 |
| ERGIC2    | 0.08833368 | 8.81543E-16 |
| PRPSAP1   | 0.1348705  | 8.88561E-16 |
| ZNF600    | 0.03290971 | 8.89796E-16 |
| ATP2A3    | 0.15613696 | 8.90388E-16 |
| TMEM33    | 0.06898521 | 8.93783E-16 |
| MVB12A    | 0.02883585 | 8.95463E-16 |
| BTD       | 0.07674387 | 9.02701E-16 |
| COA7      | 0.0784205  | 9.03752E-16 |
| FBXW7     | -0.1603895 | 9.06723E-16 |
| PTBP2     | -0.1991708 | 9.16916E-16 |
| NCBP2AS2  | 0.13013754 | 9.31086E-16 |
| PITRM1    | 0.05639827 | 9.32643E-16 |
| GGA2      | 0.10659058 | 9.40288E-16 |
| ZBTB37    | 0.16233054 | 9.45068E-16 |
| PSEN1     | -0.0839123 | 9.48726E-16 |
| LGALS3BP  | -0.2492657 | 9.69135E-16 |
| LATS1     | 0.05971495 | 9.7075E-16  |
| COMMD2    | -0.0223467 | 9.80811E-16 |
| AARSD1    | 0.03216169 | 9.89431E-16 |
| ZNF761    | 0.08796834 | 9.94283E-16 |
| ZNF551    | 0.06589817 | 1.00662E-15 |
| CEP104    | 0.10650878 | 1.00685E-15 |
| CCDC18-AS | 0.17361094 | 1.00977E-15 |
| CLPTM1    | -0.035599  | 1.01171E-15 |
| REEP4     | -0.0312215 | 1.01697E-15 |
| RNF141    | -0.0082572 | 1.02654E-15 |
| GALNT4    | -0.2047301 | 1.0295E-15  |
| TRAPPC2   | 0.059584   | 1.04409E-15 |
| FAM89A    | 0.0794064  | 1.04483E-15 |
| BIRC2     | 0.0649387  | 1.04831E-15 |
| SSNA1     | 0.00396443 | 1.05577E-15 |
| KLHDC1    | 0.08191699 | 1.06087E-15 |

|            |            |             |
|------------|------------|-------------|
| ID3        | -0.2619272 | 1.06426E-15 |
| MMAB       | 0.07792401 | 1.06932E-15 |
| AGO4       | 0.05803536 | 1.08734E-15 |
| MFF        | 0.05772579 | 1.09E-15    |
| NFATC2IP   | -0.0403145 | 1.09854E-15 |
| AF117829.1 | 0.10264977 | 1.1076E-15  |
| WBP1L      | -0.1547889 | 1.11294E-15 |
| RUFY3      | -0.01842   | 1.12523E-15 |
| TRIM4      | 0.08671061 | 1.13419E-15 |
| NCAPD3     | 0.07985583 | 1.13452E-15 |
| ZBED1      | 0.11588248 | 1.13588E-15 |
| GCDH       | 0.06631214 | 1.14456E-15 |
| TJAP1      | 0.00923281 | 1.14639E-15 |
| ARFGEF1    | 0.06078401 | 1.14692E-15 |
| NOL6       | 0.08135185 | 1.14698E-15 |
| GMNN       | -0.0596528 | 1.14793E-15 |
| SLC66A2    | -0.1207974 | 1.15491E-15 |
| CSF1R      | 0.12773984 | 1.16917E-15 |
| DNAJB12    | -0.0948985 | 1.17114E-15 |
| ADARB1     | 0.10321234 | 1.17194E-15 |
| SMIM24     | 0.41996367 | 1.17715E-15 |
| PRPF4      | -0.0414824 | 1.1776E-15  |
| IRAK4      | 0.16133194 | 1.18019E-15 |
| C8orf33    | 0.11276939 | 1.18112E-15 |
| USP10      | -0.0219159 | 1.18205E-15 |
| MTHFD1L    | 0.09682004 | 1.18652E-15 |
| GTF3C6     | -0.100717  | 1.18807E-15 |
| ADSL       | 0.07949761 | 1.19435E-15 |
| ACAD8      | 0.03038144 | 1.19457E-15 |
| ARL6IP4    | -0.2974512 | 1.20317E-15 |
| KIAA2026   | 0.10072229 | 1.20786E-15 |
| MRPL12     | 0.09153424 | 1.20916E-15 |
| ABCB7      | 0.13367768 | 1.21309E-15 |
| TAF7       | 0.29720349 | 1.21652E-15 |
| DDX52      | 0.0348418  | 1.21686E-15 |
| CTDSP1     | -0.085777  | 1.22029E-15 |
| NMT1       | 0.06494948 | 1.23361E-15 |
| UCHL3      | -0.0180909 | 1.23767E-15 |
| C22orf39   | 0.00200545 | 1.23987E-15 |
| SNHG15     | -0.2056157 | 1.24914E-15 |
| UBR5       | -0.188365  | 1.25584E-15 |
| CHP1       | 0.01806849 | 1.25652E-15 |
| AKAP1      | 0.13161151 | 1.26069E-15 |
| ARSB       | 0.08948305 | 1.26196E-15 |
| SOAT1      | 0.12495336 | 1.2641E-15  |
| AAK1       | 0.21928497 | 1.26672E-15 |
| PAK1IP1    | 0.1735383  | 1.27065E-15 |
| CUX1       | 0.24062381 | 1.27183E-15 |
| NSUN5      | 0.10553078 | 1.28123E-15 |
| NFATC3     | 0.08793653 | 1.29447E-15 |



|            |            |             |
|------------|------------|-------------|
| CHAMP1     | -0.1085899 | 1.29522E-15 |
| GTF2E2     | 0.06051915 | 1.29782E-15 |
| PARL       | 0.09503005 | 1.31297E-15 |
| HDHD3      | 0.00721934 | 1.31607E-15 |
| STAU1      | -0.1339726 | 1.32872E-15 |
| FAM214A    | -0.0222594 | 1.33568E-15 |
| ZNHIT3     | -0.018792  | 1.35708E-15 |
| RSRP1      | 0.32942683 | 1.36667E-15 |
| SMARCC2    | 0.23205447 | 1.36972E-15 |
| SMYD3      | 0.15908857 | 1.37176E-15 |
| GOT2       | 0.05214001 | 1.4011E-15  |
| STN1       | -0.026654  | 1.40493E-15 |
| PDRG1      | -0.1498175 | 1.41543E-15 |
| MAN2C1     | -0.0490377 | 1.41671E-15 |
| DNPEP      | 0.07481631 | 1.41719E-15 |
| EA2F2      | -0.1930962 | 1.41976E-15 |
| GMDS-DT    | 0.11794454 | 1.43729E-15 |
| DPY19L3    | 0.12783204 | 1.44823E-15 |
| CLK2       | 0.02717078 | 1.45224E-15 |
| ARIH1      | -0.1678491 | 1.45241E-15 |
| AIFM1      | 0.14428996 | 1.45617E-15 |
| CD151      | -0.2070876 | 1.46562E-15 |
| CTNND1     | 0.13696499 | 1.50037E-15 |
| MFSD12     | -0.1283639 | 1.50113E-15 |
| RNF149     | -0.2251094 | 1.50827E-15 |
| PLIN2      | 0.1650069  | 1.50854E-15 |
| ZFP64      | 0.06784733 | 1.51084E-15 |
| ST8SIA4    | 0.0482048  | 1.5204E-15  |
| TNPO1      | 0.09592795 | 1.53156E-15 |
| SDF2       | -0.0616464 | 1.53574E-15 |
| MKRN2      | -0.091975  | 1.54264E-15 |
| NCK1-DT    | 0.14238102 | 1.54815E-15 |
| ZBED3      | 0.00596232 | 1.55206E-15 |
| EIF3G      | -0.329236  | 1.55619E-15 |
| TMCC1      | 0.0590354  | 1.55982E-15 |
| CNP        | 0.07393117 | 1.56658E-15 |
| UBE2L6     | -0.0250272 | 1.56871E-15 |
| AL009179.2 | 0.1011555  | 1.57117E-15 |
| STAT3      | -0.1590523 | 1.57152E-15 |
| ZNF546     | 0.08828265 | 1.57175E-15 |
| CLUAP1     | -0.0190772 | 1.5982E-15  |
| RICTOR     | -0.211511  | 1.60858E-15 |
| KMT2C      | -0.0934119 | 1.62112E-15 |
| MVP        | -0.1805818 | 1.63243E-15 |
| LAT2       | 0.31911498 | 1.63723E-15 |
| XPO4       | 0.03732921 | 1.65532E-15 |
| HNRNPH2    | -0.1379052 | 1.66735E-15 |
| CTSB       | 0.06064241 | 1.67007E-15 |
| RASAL2     | 0.11475962 | 1.68996E-15 |
| PAF1       | -0.2207017 | 1.69592E-15 |

|            |            |             |
|------------|------------|-------------|
| CES2       | 0.04555534 | 1.69895E-15 |
| RABGGTB    | 0.10177728 | 1.6993E-15  |
| UPF3B      | 0.18036006 | 1.69993E-15 |
| SPSB3      | -0.0616081 | 1.70283E-15 |
| NIN        | 0.1867412  | 1.70431E-15 |
| OTUD5      | -0.1098538 | 1.71374E-15 |
| MRPL24     | 0.16630823 | 1.71471E-15 |
| KCNQ5      | 0.13718661 | 1.73609E-15 |
| NPEPPS     | -0.2211563 | 1.7532E-15  |
| FTCDNL1    | 0.1138686  | 1.75356E-15 |
| CRCP       | 0.02706825 | 1.75442E-15 |
| ENDOV      | -0.0966677 | 1.75479E-15 |
| AC090825.1 | 0.08710884 | 1.76292E-15 |
| KIAA1549   | 0.07376052 | 1.76307E-15 |
| MIF4GD     | 0.06372019 | 1.76323E-15 |
| SLF2       | 0.09400423 | 1.78424E-15 |
| MIGA1      | 0.0066945  | 1.78675E-15 |
| ZCCHC17    | -0.0212836 | 1.8248E-15  |
| ANAPC1     | 0.09925183 | 1.82924E-15 |
| ITCH       | -0.1349411 | 1.83115E-15 |
| ZNF70      | 0.07528493 | 1.83254E-15 |
| CPOX       | 0.06352032 | 1.83489E-15 |
| PBX3       | -0.2634824 | 1.83519E-15 |
| S100A1     | -0.264238  | 1.83541E-15 |
| MYL6B      | -0.0509238 | 1.8406E-15  |
| SNX15      | 0.04558605 | 1.86952E-15 |
| MRPL36     | 0.02538488 | 1.87576E-15 |
| SFSWAP     | -0.0321684 | 1.87705E-15 |
| ZNF738     | 0.03559894 | 1.90027E-15 |
| TEN1       | -0.054084  | 1.91031E-15 |
| FARSB      | 0.12374495 | 1.91764E-15 |
| CCDC126    | 0.06802659 | 1.9368E-15  |
| CREBBP     | 0.0101399  | 1.94318E-15 |
| FBXO3      | -0.0801224 | 1.94763E-15 |
| ARHGEF9    | 0.05463422 | 1.96917E-15 |
| TLR4       | 0.08698294 | 2.02367E-15 |
| AATF       | -0.0004605 | 2.02452E-15 |
| PPP2R3C    | 0.0778472  | 2.02494E-15 |
| C1orf52    | -0.1268395 | 2.0276E-15  |
| GALT       | 0.0397844  | 2.0322E-15  |
| MGME1      | 0.05863956 | 2.03805E-15 |
| FAM118A    | -0.1206563 | 2.05087E-15 |
| HACD2      | 0.09125615 | 2.06028E-15 |
| DNMT3B     | -0.0685212 | 2.06653E-15 |
| HCCS       | -0.1340697 | 2.07025E-15 |
| FBXO22     | 0.23463008 | 2.08585E-15 |
| C2orf74    | 0.12142164 | 2.1115E-15  |
| SNAPC3     | 0.09791024 | 2.13341E-15 |
| SMG7       | -0.0742711 | 2.14391E-15 |
| LIN7C      | 0.09607692 | 2.16451E-15 |

|           |            |             |
|-----------|------------|-------------|
| TAF15     | 0.21900334 | 2.17025E-15 |
| SRGN      | 0.69685572 | 2.1777E-15  |
| NLK       | 0.15983414 | 2.1812E-15  |
| LAMTOR3   | -0.054192  | 2.18316E-15 |
| OBI1      | 0.06673638 | 2.18894E-15 |
| ABHD13    | 0.10704978 | 2.20483E-15 |
| FLOT2     | -0.0424801 | 2.20875E-15 |
| BCOR      | -0.2319799 | 2.22133E-15 |
| DPAGT1    | 0.06110948 | 2.22502E-15 |
| UQCRC1    | -0.0729858 | 2.2554E-15  |
| AP1B1     | 0.00496353 | 2.2601E-15  |
| MIEN1     | 0.05745282 | 2.27272E-15 |
| BCL11A    | 0.27962981 | 2.28236E-15 |
| PPIF      | -0.2344733 | 2.301E-15   |
| OAF       | -0.1688434 | 2.30159E-15 |
| HLA-DRA   | -0.3623848 | 2.37376E-15 |
| TRA2A     | 0.00038463 | 2.39595E-15 |
| NOB1      | 0.1401348  | 2.40882E-15 |
| MRRF      | 0.06837364 | 2.41495E-15 |
| PIGH      | 0.07714122 | 2.44189E-15 |
| SDAD1     | 0.12932446 | 2.45964E-15 |
| CELF2     | 0.32567993 | 2.46039E-15 |
| MCM2      | -0.0135475 | 2.47507E-15 |
| KIAA0586  | 0.12574618 | 2.4842E-15  |
| NDUFA6    | -0.20295   | 2.50363E-15 |
| TMEM256   | 0.15651503 | 2.50948E-15 |
| VDAC3     | 0.16512338 | 2.51263E-15 |
| MAP4K3-DT | -0.0373232 | 2.51738E-15 |
| COPG1     | 0.03853701 | 2.53356E-15 |
| ARID5B    | 0.13006099 | 2.55634E-15 |
| ABHD8     | 0.09343494 | 2.58845E-15 |
| IPO5      | 0.10231171 | 2.59246E-15 |
| ERCC6     | 0.09812002 | 2.59476E-15 |
| TMEM50B   | -0.034574  | 2.60966E-15 |
| HIVEP2    | -0.2223518 | 2.62349E-15 |
| COPS7A    | -0.0170141 | 2.62484E-15 |
| TMEM127   | -0.0742271 | 2.63737E-15 |
| UBQLN2    | 0.07870699 | 2.65156E-15 |
| CCNT2     | -0.0721677 | 2.67199E-15 |
| TOMM20    | 0.2921861  | 2.68336E-15 |
| FAM43A    | 0.21648394 | 2.70195E-15 |
| MRPL58    | 0.03761822 | 2.70357E-15 |
| PIAS2     | 0.17091339 | 2.706E-15   |
| SDHC      | 0.21833863 | 2.71154E-15 |
| TMEM144   | 0.08152278 | 2.72493E-15 |
| GPSM3     | -0.3211325 | 2.7568E-15  |
| BAG4      | -0.011689  | 2.794E-15   |
| EXOC7     | 0.01567086 | 2.80072E-15 |
| LSM2      | 0.27129038 | 2.80319E-15 |
| PRICKLE1  | -0.0749864 | 2.83194E-15 |

|            |            |             |
|------------|------------|-------------|
| SPAST      | 0.08354966 | 2.83937E-15 |
| HIST2H2AC  | 0.12866771 | 2.85073E-15 |
| RIOK1      | 0.05106246 | 2.86037E-15 |
| RNF2       | -0.1473924 | 2.88794E-15 |
| SCOC-AS1   | 0.12426232 | 2.90659E-15 |
| GGA1       | -0.1497647 | 2.92951E-15 |
| INTS4      | 0.06554295 | 2.93141E-15 |
| SLC25A43   | 0.05540217 | 2.97536E-15 |
| GPX7       | 0.04373848 | 2.98941E-15 |
| SRC        | -0.2180757 | 2.99653E-15 |
| CYB5D2     | 0.09560572 | 3.00666E-15 |
| PIEZO1     | -0.0704804 | 3.01429E-15 |
| SCAP       | 0.07065431 | 3.0464E-15  |
| MESD       | 0.12409765 | 3.06453E-15 |
| COMMD8     | 0.14341102 | 3.07728E-15 |
| DENND10    | -0.0016321 | 3.11196E-15 |
| SNHG10     | 0.04478924 | 3.12327E-15 |
| TMEM184C   | 0.10152626 | 3.13269E-15 |
| SEC23B     | 0.03792301 | 3.1491E-15  |
| ISCA2      | -0.0226995 | 3.16447E-15 |
| MBLAC2     | 0.07788401 | 3.17155E-15 |
| AC074117.1 | 0.07905013 | 3.17255E-15 |
| EXOSC10    | 0.05283832 | 3.20035E-15 |
| COX11      | 0.11484451 | 3.22122E-15 |
| MEA1       | 0.03128567 | 3.22197E-15 |
| MTF2       | -0.1451638 | 3.23634E-15 |
| UHRF2      | -0.0967791 | 3.25247E-15 |
| PLEKHB2    | -0.0649044 | 3.25401E-15 |
| CTDNBP1    | -0.0430702 | 3.28486E-15 |
| TIMM8B     | 0.18314647 | 3.29321E-15 |
| PBX2       | 0.03362997 | 3.29433E-15 |
| ACYP1      | 0.00036218 | 3.30916E-15 |
| ZFX        | 0.15620017 | 3.32349E-15 |
| AC092069.1 | 0.12273134 | 3.35571E-15 |
| CNPY2      | 0.20116282 | 3.35633E-15 |
| RING1      | 0.02486205 | 3.37677E-15 |
| COMMD7     | -0.2594583 | 3.37801E-15 |
| DDX60L     | 0.14443729 | 3.38541E-15 |
| ZNF800     | -0.1586216 | 3.42402E-15 |
| MRPS15     | 0.1121011  | 3.43577E-15 |
| IFNGR1     | -0.2050331 | 3.45024E-15 |
| ZNF561-AS1 | 0.10359067 | 3.48731E-15 |
| ABHD3      | 0.03719689 | 3.49118E-15 |
| SIRPA      | 0.09893393 | 3.52494E-15 |
| RFC2       | -0.0386914 | 3.53878E-15 |
| ETHE1      | -0.1378695 | 3.56714E-15 |
| RAB3D      | -0.0243167 | 3.56728E-15 |
| CTNBP1     | -0.0011007 | 3.57104E-15 |
| BIN3       | -0.1617549 | 3.60724E-15 |
| AC007262.2 | 0.09867323 | 3.63088E-15 |

|            |            |             |
|------------|------------|-------------|
| CHMP4A     | 0.14349702 | 3.64256E-15 |
| PNPLA6     | -0.116731  | 3.64352E-15 |
| VTI1A      | -0.0613278 | 3.65544E-15 |
| METTL25    | 0.09026324 | 3.66807E-15 |
| KATNBL1    | 0.24134859 | 3.68409E-15 |
| TET3       | 0.06258763 | 3.68576E-15 |
| WWC3       | 0.09296179 | 3.69172E-15 |
| GTF2B      | -0.1047104 | 3.71518E-15 |
| CCZ1B      | 0.06580897 | 3.71774E-15 |
| ZNF273     | 0.03416517 | 3.79085E-15 |
| FBXO4      | 0.07054208 | 3.79773E-15 |
| MFSD4B     | 0.18095824 | 3.80163E-15 |
| TMEM260    | 0.15025395 | 3.85207E-15 |
| TWF1       | 0.02984551 | 3.87252E-15 |
| CLK3       | -0.1672582 | 3.89815E-15 |
| RMI1       | 0.11358034 | 3.95219E-15 |
| PSMG3      | -0.0183381 | 3.95298E-15 |
| PTCD3      | 0.15045396 | 3.95591E-15 |
| RPN2       | -0.1099206 | 3.95606E-15 |
| KLHDC4     | 0.03101053 | 3.96052E-15 |
| NDC1       | 0.07680411 | 3.96913E-15 |
| USP7       | -0.0562338 | 3.96996E-15 |
| SRFBP1     | -0.0303498 | 3.98435E-15 |
| RPL3       | -0.2847137 | 4.03892E-15 |
| UQCRB      | 0.24680414 | 4.04829E-15 |
| B3GNT8     | -0.2010102 | 4.08388E-15 |
| SLC25A11   | 0.02006035 | 4.10007E-15 |
| NBDY       | -0.209663  | 4.10304E-15 |
| TMEM177    | 0.06087129 | 4.11185E-15 |
| FUBP3      | 0.08589914 | 4.12465E-15 |
| AP002449.1 | 0.05929646 | 4.13414E-15 |
| ARHGEF19   | 0.06545344 | 4.14489E-15 |
| MXRA7      | 0.06678534 | 4.15089E-15 |
| SMU1       | 0.06006404 | 4.15761E-15 |
| MIRLET7BH  | -0.1470407 | 4.18113E-15 |
| ROCK1      | -0.3477789 | 4.1868E-15  |
| NFE2L3     | 0.18277185 | 4.2424E-15  |
| PURB       | -0.0148992 | 4.24289E-15 |
| AC021097.2 | 0.06596607 | 4.25893E-15 |
| KANSL1     | -0.0427281 | 4.28806E-15 |
| ZSCAN30    | 0.1046176  | 4.30671E-15 |
| DOCK5      | -0.1364162 | 4.32441E-15 |
| CASS4      | -0.1896211 | 4.35766E-15 |
| HIST1H2AK  | 0.11205501 | 4.35786E-15 |
| DOCK1      | -0.1857668 | 4.38357E-15 |
| ADAM28     | 0.33330774 | 4.38864E-15 |
| SLC35F5    | 0.03573468 | 4.41265E-15 |
| RPL9       | 0.16300865 | 4.43018E-15 |
| THUMPD3-A  | -0.1932895 | 4.45506E-15 |
| LYRM2      | 0.07775448 | 4.47911E-15 |

|            |            |             |
|------------|------------|-------------|
| HOXA7      | 0.00659614 | 4.52865E-15 |
| ASF1A      | 0.10902124 | 4.56158E-15 |
| ANKLE2     | -0.1504545 | 4.57599E-15 |
| YEATS4     | 0.00755367 | 4.59358E-15 |
| MPDU1      | -0.0980249 | 4.59557E-15 |
| SLC7A6OS   | -0.0144663 | 4.65974E-15 |
| DR1        | -0.0155011 | 4.67815E-15 |
| SLC2A5     | 0.11158551 | 4.69213E-15 |
| DMAC2      | 0.04073743 | 4.72462E-15 |
| PRKAG1     | 0.04180446 | 4.75783E-15 |
| COG5       | 0.09160063 | 4.80805E-15 |
| WDR45      | -0.035145  | 4.82191E-15 |
| SLC25A37   | 0.22670786 | 4.83635E-15 |
| TNFRSF25   | -0.1848212 | 4.85322E-15 |
| ZBTB40     | 0.09211831 | 4.90986E-15 |
| ARL16      | -0.0596814 | 4.92952E-15 |
| ANP32E     | 0.24729398 | 4.93558E-15 |
| ZNF3       | -0.1626581 | 4.9373E-15  |
| DMAP1      | -0.0016586 | 4.98454E-15 |
| ACADS      | -0.0190595 | 5.04034E-15 |
| GID8       | -0.0417267 | 5.09412E-15 |
| GAK        | -0.0204535 | 5.10256E-15 |
| ZNF579     | -0.1790186 | 5.11077E-15 |
| AC002310.1 | 0.06505353 | 5.11308E-15 |
| PNKD       | 0.17125214 | 5.18882E-15 |
| CDC42SE2   | -0.2422183 | 5.19951E-15 |
| EXOC5      | -0.0550918 | 5.25527E-15 |
| RFXAP      | 0.0820963  | 5.25675E-15 |
| EBP        | 0.05947863 | 5.35614E-15 |
| CARD16     | -0.016626  | 5.41623E-15 |
| FAM122B    | 0.04126515 | 5.42255E-15 |
| NUCB1      | -0.1055229 | 5.42761E-15 |
| YAF2       | -0.0765688 | 5.43171E-15 |
| FTSJ1      | 0.0183914  | 5.49177E-15 |
| CYP7B1     | 0.12341853 | 5.49772E-15 |
| ACAD10     | 0.06733039 | 5.50728E-15 |
| NEK6       | 0.0676805  | 5.52913E-15 |
| C9orf43    | 0.06681382 | 5.55581E-15 |
| WHRN       | -0.0884413 | 5.5596E-15  |
| ZNF506     | 0.20857591 | 5.57644E-15 |
| HAVCR2     | -0.0662762 | 5.5831E-15  |
| TMEM134    | -0.0473338 | 5.61934E-15 |
| GID4       | 0.0859174  | 5.62184E-15 |
| UBE2E3     | -0.0236527 | 5.65527E-15 |
| SMCR8      | 0.08690653 | 5.68024E-15 |
| COA8       | -0.0037771 | 5.76555E-15 |
| UBALD1     | -0.0664166 | 5.7977E-15  |
| TRANK1     | 0.15843092 | 5.88601E-15 |
| MED4       | -0.1123761 | 5.94962E-15 |
| CCDC127    | -0.1593701 | 5.97296E-15 |

|            |            |             |
|------------|------------|-------------|
| CTBP1-DT   | 0.10610804 | 6.01377E-15 |
| CXCR4      | 0.16384154 | 6.07745E-15 |
| SPN        | 0.33622112 | 6.07957E-15 |
| MPG        | -0.2200888 | 6.08155E-15 |
| ARL1       | 0.03703389 | 6.12291E-15 |
| RGS14      | -0.1636345 | 6.15423E-15 |
| RAD51D     | 0.07591938 | 6.15962E-15 |
| CCDC22     | -0.0021097 | 6.16485E-15 |
| TMEM19     | 0.08383097 | 6.18017E-15 |
| PTCD1      | 0.063687   | 6.19521E-15 |
| PPFIA1     | 0.10591813 | 6.19753E-15 |
| NAA10      | -0.1043634 | 6.24387E-15 |
| HBS1L      | 0.038469   | 6.2507E-15  |
| LONRF1     | -0.2173031 | 6.25181E-15 |
| HAUS2      | -0.1510977 | 6.37248E-15 |
| TCFL5      | 0.08093901 | 6.37865E-15 |
| CDK10      | 0.00130923 | 6.38396E-15 |
| MSL1       | 0.11321522 | 6.38519E-15 |
| RMDN1      | 0.09980558 | 6.39235E-15 |
| BIN2       | 0.1421532  | 6.49077E-15 |
| ZNF74      | 0.09953003 | 6.51355E-15 |
| MBIP       | -0.0150075 | 6.53559E-15 |
| WDR82      | -0.1007275 | 6.53893E-15 |
| EFCAB2     | -0.0021696 | 6.55156E-15 |
| PDE6D      | 0.06555307 | 6.5752E-15  |
| RNASEL     | 0.10606332 | 6.60528E-15 |
| STX4       | -0.0694921 | 6.61463E-15 |
| HESX1      | 0.07699747 | 6.61746E-15 |
| FANCB      | 0.03849233 | 6.62916E-15 |
| RBM34      | 0.05200672 | 6.69429E-15 |
| FBXW5      | -0.0447579 | 6.70931E-15 |
| PTGES3     | 0.2840756  | 6.72757E-15 |
| MAPKBP1    | -0.2465089 | 6.74303E-15 |
| SLC35B4    | 0.08068011 | 6.84937E-15 |
| GPS1       | -0.0062861 | 6.86863E-15 |
| TAF4       | 0.02799587 | 6.92589E-15 |
| AC027601.6 | -0.1638127 | 6.97814E-15 |
| THUMPD3    | -0.0401499 | 6.98013E-15 |
| MRNIP      | -0.0052528 | 6.98503E-15 |
| GTF2IRD2   | 0.07387915 | 6.98573E-15 |
| SHARPIN    | -0.0206376 | 7.0011E-15  |
| SNF8       | -0.0487898 | 7.05558E-15 |
| NKX2-3     | 0.05534973 | 7.12078E-15 |
| PIK3CD     | 0.06484539 | 7.15024E-15 |
| AKR1A1     | 0.01378477 | 7.17652E-15 |
| COX7C      | 0.20850406 | 7.42884E-15 |
| TMEM203    | 0.06847118 | 7.43874E-15 |
| ST6GALNAC  | -0.1462343 | 7.44079E-15 |
| KLC1       | -0.1312799 | 7.45256E-15 |
| ENG        | 0.08366902 | 7.53256E-15 |

|           |            |             |
|-----------|------------|-------------|
| AKT1      | -0.0029444 | 7.6053E-15  |
| NUP62     | -0.0693298 | 7.63819E-15 |
| HPS1      | 0.11726138 | 7.77062E-15 |
| WDR81     | 0.01853248 | 7.77337E-15 |
| ZC3H14    | 0.09898804 | 7.79835E-15 |
| SLC48A1   | 0.04587788 | 7.8001E-15  |
| FAM117A   | 0.25944431 | 7.8596E-15  |
| EPC2      | 0.0626933  | 7.88789E-15 |
| RNF167    | -0.1217714 | 7.89208E-15 |
| GDAP2     | 0.00587583 | 7.8938E-15  |
| ERO1A     | -0.0185992 | 8.05801E-15 |
| RFK       | -0.0554872 | 8.09636E-15 |
| LINC01138 | 0.08428139 | 8.10957E-15 |
| ANAPC7    | 0.06047262 | 8.12541E-15 |
| CYB561A3  | -0.0029274 | 8.22133E-15 |
| ANKHD1    | 0.15550696 | 8.22686E-15 |
| TMEM216   | -0.0255998 | 8.24496E-15 |
| PHKG1     | 0.09651651 | 8.28111E-15 |
| CSTF2T    | 0.0857424  | 8.28742E-15 |
| POT1      | 0.0819316  | 8.31472E-15 |
| SNRNP70   | 0.06414584 | 8.35768E-15 |
| SMCHD1    | 0.23321483 | 8.43905E-15 |
| IMP4      | -0.0217839 | 8.48581E-15 |
| STX5      | -0.1273414 | 8.57567E-15 |
| PDIA3     | -0.2592972 | 8.57789E-15 |
| RIC8B     | 0.06282914 | 8.77725E-15 |
| ABI2      | -0.2247831 | 8.80577E-15 |
| SS18      | -0.0493491 | 8.81268E-15 |
| SLA2      | -0.0312018 | 8.82088E-15 |
| NECAP1    | 0.01375348 | 8.87218E-15 |
| FOXJ3     | -0.0732275 | 8.88223E-15 |
| BAG1      | 0.15912662 | 8.89839E-15 |
| AKT2      | -0.0713284 | 8.92706E-15 |
| CCDC174   | -0.1304888 | 8.96591E-15 |
| SERTAD3   | -0.2137333 | 8.99052E-15 |
| CNN2      | -0.0718581 | 9.23757E-15 |
| SF3A1     | 0.02481169 | 9.25073E-15 |
| BUD13     | -0.0721525 | 9.25354E-15 |
| KIF22     | 0.08691993 | 9.27082E-15 |
| VAPB      | -0.0896866 | 9.37815E-15 |
| RMND5A    | 0.04122951 | 9.39493E-15 |
| USP12     | -0.2377196 | 9.46629E-15 |
| HINT2     | 0.01068595 | 9.47014E-15 |
| NUP93     | 0.00328902 | 9.4716E-15  |
| GOLGA7    | 0.07281613 | 9.5097E-15  |
| WDFY1     | 0.16420037 | 9.51098E-15 |
| TAZ       | -0.1412146 | 9.51312E-15 |
| CSNK1G2   | 0.07491505 | 9.53567E-15 |
| FZR1      | -0.2105781 | 9.54751E-15 |
| APPBP2    | -0.1027108 | 9.56362E-15 |



|            |            |             |
|------------|------------|-------------|
| RPN1       | 0.01414314 | 9.59923E-15 |
| MAPK14     | -0.0084975 | 9.62473E-15 |
| TTC21B     | 0.05263756 | 9.64787E-15 |
| VAMP4      | 0.08627831 | 9.68449E-15 |
| PSMC6      | -0.0700914 | 9.75599E-15 |
| RILP       | -0.0083888 | 9.75621E-15 |
| PPP2R5A    | 0.0172357  | 9.78092E-15 |
| CSNK2B     | -0.2412857 | 9.84303E-15 |
| SRRT       | 0.0622498  | 9.85057E-15 |
| NFKBIE     | -0.1140984 | 9.91752E-15 |
| MBD5       | 0.03626073 | 1.01119E-14 |
| SDHD       | 0.15080563 | 1.01857E-14 |
| OSTF1      | 0.10676152 | 1.01929E-14 |
| CNOT7      | 0.14833103 | 1.02092E-14 |
| ABCD4      | -0.045217  | 1.03101E-14 |
| TXNDC15    | 0.04343948 | 1.03211E-14 |
| ZNF557     | 0.0768493  | 1.03379E-14 |
| IER3       | -0.4788171 | 1.04403E-14 |
| PTPN11     | 0.02034211 | 1.04525E-14 |
| USP9X      | -0.1481521 | 1.04558E-14 |
| ZNF48      | -0.1509467 | 1.04562E-14 |
| GCH1       | -0.2835053 | 1.04848E-14 |
| TMEM106A   | 0.03825144 | 1.06988E-14 |
| RRM1       | 0.07299171 | 1.08451E-14 |
| TRIQK      | 0.07930377 | 1.08554E-14 |
| TMEM147-A  | 0.1064527  | 1.08571E-14 |
| DNAJC13    | 0.1380103  | 1.08775E-14 |
| NAPG       | -0.1933475 | 1.09292E-14 |
| PACS1      | 0.02603938 | 1.101E-14   |
| ZBTB33     | 0.09858904 | 1.11136E-14 |
| SIKE1      | 0.05299031 | 1.11525E-14 |
| HOOK2      | 0.0380028  | 1.11631E-14 |
| RAP2C      | -0.0377697 | 1.11778E-14 |
| CCNH       | -0.0109747 | 1.13995E-14 |
| SORD       | 0.15785269 | 1.14372E-14 |
| HINFP      | 0.01113353 | 1.14688E-14 |
| WDR18      | -0.041943  | 1.14853E-14 |
| KPNA6      | -0.1635268 | 1.15079E-14 |
| TMSB4X     | 0.37834258 | 1.15744E-14 |
| PTEN       | 0.27166731 | 1.16631E-14 |
| TBC1D9B    | 0.11259185 | 1.1754E-14  |
| WASIR2     | 0.05763862 | 1.19058E-14 |
| ZNRD2      | -0.085198  | 1.20335E-14 |
| AC016831.1 | -0.1832734 | 1.20544E-14 |
| NHP2       | 0.22693723 | 1.22205E-14 |
| SMIM1      | 0.1016845  | 1.22266E-14 |
| ENOSF1     | 0.19530033 | 1.2273E-14  |
| MIEF1      | 0.08797759 | 1.23197E-14 |
| SIL1       | -0.1711724 | 1.24087E-14 |
| TMEM147    | 0.14874997 | 1.24227E-14 |

|            |            |             |
|------------|------------|-------------|
| ELOVL1     | -0.0714646 | 1.24238E-14 |
| WWP1       | 0.06255574 | 1.2501E-14  |
| PDIA6      | -0.0936062 | 1.25272E-14 |
| RBM42      | -0.1257726 | 1.25378E-14 |
| EIF2B3     | 0.10789576 | 1.25549E-14 |
| NSL1       | 0.08501854 | 1.27356E-14 |
| ARHGEF1    | -0.1358918 | 1.29057E-14 |
| MDC1       | 0.02304134 | 1.30904E-14 |
| GSK3A      | -0.1306777 | 1.32489E-14 |
| NPM1       | 0.26037806 | 1.33236E-14 |
| BOP1       | 0.0356915  | 1.34271E-14 |
| TFPT       | 0.05982347 | 1.34515E-14 |
| MED1       | 0.0389618  | 1.34583E-14 |
| ANKRD39    | 0.04079364 | 1.35492E-14 |
| SPRED2     | -0.1602572 | 1.35802E-14 |
| EIF2B5     | 0.02572028 | 1.35806E-14 |
| TDG        | 0.12426284 | 1.35896E-14 |
| NCKAP5L    | -0.1487018 | 1.37693E-14 |
| POM121     | 0.0382422  | 1.37728E-14 |
| BNIP2      | -0.2479391 | 1.37758E-14 |
| CUEDC2     | 0.0148135  | 1.38707E-14 |
| DPY19L1    | 0.10542661 | 1.39551E-14 |
| DCUN1D1    | 0.08200133 | 1.39558E-14 |
| RARS2      | -0.0230908 | 1.40655E-14 |
| LINC00339  | 0.07796273 | 1.41044E-14 |
| GOLPH3     | -0.1276406 | 1.42404E-14 |
| GPRC5D-AS  | 0.05395322 | 1.43382E-14 |
| BDH1       | 0.12576046 | 1.45076E-14 |
| RNF123     | 0.07259642 | 1.45359E-14 |
| LINC00662  | 0.1078284  | 1.45988E-14 |
| SH2D2A     | -0.2217536 | 1.46653E-14 |
| AC006213.2 | 0.0788914  | 1.47604E-14 |
| ATP6V0D1   | -0.1415161 | 1.48194E-14 |
| LINC02802  | 0.11262089 | 1.48349E-14 |
| SMNDC1     | 0.12121343 | 1.48932E-14 |
| ARMC5      | 0.08183466 | 1.49445E-14 |
| BTBD6      | 0.06138201 | 1.49632E-14 |
| DNAJC5     | -0.1287997 | 1.50199E-14 |
| APH1A      | -0.1182226 | 1.51143E-14 |
| MYLK-AS1   | 0.07642811 | 1.51205E-14 |
| MRPL52     | 0.07533608 | 1.52137E-14 |
| DCK        | 0.17673966 | 1.53609E-14 |
| CNNM3      | 0.09379903 | 1.53746E-14 |
| PRKAR1A    | -0.1436694 | 1.55344E-14 |
| CDC16      | 0.09052919 | 1.55559E-14 |
| AC139887.2 | -0.0933748 | 1.55915E-14 |
| DNAJB14    | -0.1568336 | 1.56041E-14 |
| NF2        | 0.05355373 | 1.5708E-14  |
| RPA1       | 0.11303342 | 1.57825E-14 |
| EPB41L3    | 0.08703813 | 1.60115E-14 |

|           |            |             |
|-----------|------------|-------------|
| RAD18     | 0.09529391 | 1.60845E-14 |
| DGKQ      | 0.09585343 | 1.61658E-14 |
| TUG1      | 0.04201691 | 1.63352E-14 |
| CD109     | -0.2912889 | 1.63699E-14 |
| PATZ1     | 0.0612569  | 1.6477E-14  |
| STK38     | 0.12169162 | 1.66493E-14 |
| TNK2      | -0.1203372 | 1.66868E-14 |
| HGS       | -0.1374631 | 1.68048E-14 |
| CEP70     | 0.10962116 | 1.68526E-14 |
| ZNF182    | 0.04817278 | 1.69785E-14 |
| YTHDF2    | -0.0089654 | 1.70724E-14 |
| RABEP1    | 0.05208007 | 1.72344E-14 |
| ZNF426    | -0.002462  | 1.72942E-14 |
| MAST3     | 0.08828882 | 1.74139E-14 |
| ZDHHC20   | 0.05755423 | 1.75561E-14 |
| BCKDK     | -0.0863734 | 1.76136E-14 |
| ATG4B     | -0.039157  | 1.76901E-14 |
| RNF187    | 0.12598443 | 1.81287E-14 |
| AMN       | -0.1870232 | 1.8145E-14  |
| C1orf122  | -0.0696437 | 1.81909E-14 |
| GIT1      | -0.006652  | 1.82255E-14 |
| CHST11    | -0.1111635 | 1.82358E-14 |
| CCNJ      | 0.06593453 | 1.82769E-14 |
| PRPF31    | 0.04865086 | 1.83145E-14 |
| RBM23     | 0.10535674 | 1.84206E-14 |
| TCEAL9    | 0.16875696 | 1.84737E-14 |
| HTATIP2   | 0.11844034 | 1.85249E-14 |
| BOD1      | 0.0510392  | 1.85398E-14 |
| ACTR6     | 0.11623656 | 1.87392E-14 |
| VPS13B-DT | 0.07579823 | 1.88693E-14 |
| BTK       | 0.16786529 | 1.88877E-14 |
| SFR1      | 0.08930076 | 1.90114E-14 |
| SLC35E1   | -0.2108713 | 1.90761E-14 |
| MTLN      | 0.09438939 | 1.91516E-14 |
| CCNDBP1   | 0.14541127 | 1.93404E-14 |
| LRBA      | -0.1071501 | 1.93588E-14 |
| ESRRA     | 0.02941209 | 1.94479E-14 |
| ZNF585B   | 0.09358215 | 1.96078E-14 |
| ENOPH1    | 0.06477817 | 1.96331E-14 |
| ZNF655    | -0.0897697 | 1.97023E-14 |
| FAM50A    | 0.0786595  | 1.97492E-14 |
| RNF220    | 0.1795456  | 1.99286E-14 |
| PTGER4    | 0.13249614 | 2.00822E-14 |
| ESYT2     | -0.145951  | 2.02028E-14 |
| SIN3B     | 0.04141118 | 2.03891E-14 |
| CARD8-AS1 | -0.0046523 | 2.04358E-14 |
| PLPP5     | 0.02462762 | 2.04516E-14 |
| CPXM1     | -0.1356161 | 2.05426E-14 |
| PPIE      | 0.09177305 | 2.05675E-14 |
| PRORP     | -0.0985719 | 2.0689E-14  |

|            |            |             |
|------------|------------|-------------|
| ZNF28      | 0.0762323  | 2.07225E-14 |
| TBC1D13    | 0.08176068 | 2.10237E-14 |
| FBXL5      | -0.0040948 | 2.12782E-14 |
| FBXW8      | 0.05911571 | 2.13416E-14 |
| PUM2       | 0.13462937 | 2.15016E-14 |
| FIS1       | -0.1454596 | 2.16101E-14 |
| COX10-AS1  | 0.06668509 | 2.17705E-14 |
| COASY      | 0.04149464 | 2.18719E-14 |
| ATAD2      | -0.0057861 | 2.19938E-14 |
| ARHGAP25   | -0.233762  | 2.19939E-14 |
| TMEM167B   | -0.095922  | 2.2141E-14  |
| BCL2L13    | -0.0418109 | 2.22598E-14 |
| LRRRC58    | 0.12800417 | 2.22991E-14 |
| PRKCD      | -0.101366  | 2.25631E-14 |
| SLC25A25-A | 0.06179662 | 2.25897E-14 |
| NOC2L      | 0.0195759  | 2.2787E-14  |
| FLYWCH1    | 0.06769496 | 2.28422E-14 |
| TXK        | 0.07032233 | 2.29216E-14 |
| CLPP       | -0.0282854 | 2.30111E-14 |
| UCK2       | -0.0478709 | 2.3096E-14  |
| MDH1       | 0.124963   | 2.32478E-14 |
| SLC38A7    | 0.07559965 | 2.3266E-14  |
| BEX4       | -0.1610052 | 2.35905E-14 |
| ATP8A1     | 0.12923274 | 2.36583E-14 |
| RABL2B     | 0.11529535 | 2.38621E-14 |
| TFIP11     | -0.1218809 | 2.4066E-14  |
| NIT1       | 0.07334158 | 2.40719E-14 |
| WDR7       | 0.10977918 | 2.42992E-14 |
| LSM10      | 0.02555038 | 2.43409E-14 |
| PPME1      | 0.02031235 | 2.4585E-14  |
| NFRKB      | 0.09028327 | 2.45949E-14 |
| ZNF787     | -0.0615377 | 2.46342E-14 |
| NUP210     | 0.08293489 | 2.47126E-14 |
| GFOD2      | -0.1191863 | 2.47268E-14 |
| AC016735.1 | 0.07038457 | 2.50964E-14 |
| EGLN1      | 0.11048784 | 2.51642E-14 |
| CYP20A1    | 0.07002507 | 2.5333E-14  |
| SNRPG      | -0.1309283 | 2.53533E-14 |
| HSH2D      | 0.08574236 | 2.54603E-14 |
| SNHG8      | 0.24085249 | 2.5604E-14  |
| SUSD6      | -0.0926787 | 2.56169E-14 |
| UBQLN4     | 0.06536995 | 2.56694E-14 |
| CEP95      | 0.02827724 | 2.58214E-14 |
| GUCD1      | 0.01254497 | 2.6411E-14  |
| INF2       | -0.1754528 | 2.6814E-14  |
| SEC24B     | -0.1237346 | 2.73834E-14 |
| AC244090.1 | 0.03025875 | 2.74225E-14 |
| UBN1       | 0.01798457 | 2.74863E-14 |
| RAB20      | -0.1139012 | 2.75839E-14 |
| NABP2      | 0.07739256 | 2.76439E-14 |

|            |            |             |
|------------|------------|-------------|
| MRPL23     | 0.15983366 | 2.76502E-14 |
| STAT5A     | 0.1257396  | 2.79058E-14 |
| PLAA       | -0.0590619 | 2.79126E-14 |
| RNF146     | 0.0178463  | 2.79915E-14 |
| CHD8       | -0.0933865 | 2.81565E-14 |
| UBE2T      | 0.04523822 | 2.82495E-14 |
| GSKIP      | -0.1348667 | 2.84539E-14 |
| CDK16      | -0.0671688 | 2.85181E-14 |
| WDPCP      | 0.11242342 | 2.86076E-14 |
| MNDA       | 0.11622948 | 2.86134E-14 |
| WDR92      | 0.06558923 | 2.86461E-14 |
| PADI2      | 0.06209169 | 2.87818E-14 |
| AC084198.2 | 0.05583598 | 2.89016E-14 |
| RANBP9     | -0.0190075 | 2.92579E-14 |
| E2F3       | 0.06727864 | 2.93165E-14 |
| TMEM115    | -0.124632  | 2.9423E-14  |
| SLC38A9    | 0.07834998 | 2.94242E-14 |
| ANKRD11    | 0.12313116 | 2.95758E-14 |
| TRAP1      | 0.06616149 | 2.96573E-14 |
| NAE1       | 0.09291743 | 2.96575E-14 |
| TIGD2      | 0.03961373 | 2.97035E-14 |
| HMG20A     | -0.0080744 | 2.97562E-14 |
| PRR13      | 0.21319225 | 2.98168E-14 |
| NIFK       | 0.26074472 | 3.00007E-14 |
| SVIP       | -0.0679829 | 3.00398E-14 |
| UTF1       | -0.2322456 | 3.01709E-14 |
| SRPRA      | 0.00692532 | 3.0187E-14  |
| NPLOC4     | -0.0108479 | 3.02205E-14 |
| PLAAT4     | -0.1502992 | 3.02474E-14 |
| RFTN1      | 0.09157985 | 3.05197E-14 |
| INPPL1     | 0.01055183 | 3.06871E-14 |
| SPTAN1     | -0.2129856 | 3.11808E-14 |
| SDSL       | 0.10105953 | 3.12108E-14 |
| TRIM59     | 0.14872464 | 3.14889E-14 |
| PARP11     | 0.11915408 | 3.15315E-14 |
| EPHA1-AS1  | 0.10155734 | 3.16274E-14 |
| NEU1       | -0.0466929 | 3.16592E-14 |
| CRTC2      | -0.1419735 | 3.16796E-14 |
| SLC8B1     | 0.04155744 | 3.16878E-14 |
| PYROXD1    | 0.06383287 | 3.18245E-14 |
| GRASP      | -0.1832118 | 3.21381E-14 |
| PI4KB      | -0.0939688 | 3.22332E-14 |
| AC004148.1 | 0.05912791 | 3.23159E-14 |
| MRTFB      | 0.05218011 | 3.29192E-14 |
| ATF7       | -0.0879325 | 3.29865E-14 |
| SFT2D2     | -0.0480782 | 3.31178E-14 |
| APOBR      | 0.03428964 | 3.31684E-14 |
| AC100810.1 | -0.1049528 | 3.32539E-14 |
| NAA20      | -0.030894  | 3.32687E-14 |
| WASHC2A    | 0.12654776 | 3.3401E-14  |

|            |            |             |
|------------|------------|-------------|
| SMARCD2    | -0.0695564 | 3.3421E-14  |
| ASB8       | -0.1576969 | 3.34712E-14 |
| ZNF793     | 0.11075776 | 3.35082E-14 |
| HSD17B10   | -0.0229491 | 3.35306E-14 |
| SOGA1      | 0.08797503 | 3.35494E-14 |
| AC019069.1 | 0.07291091 | 3.37418E-14 |
| ALDH1B1    | 0.051499   | 3.37482E-14 |
| FHIT       | 0.07289099 | 3.38888E-14 |
| RAB3GAP1   | -0.0018063 | 3.40024E-14 |
| BTBD7      | -0.1601043 | 3.41062E-14 |
| GTF2A2     | 0.16101037 | 3.45092E-14 |
| ACAP2      | -0.0692559 | 3.46179E-14 |
| OAT        | 0.15601965 | 3.46457E-14 |
| MZT2A      | -0.1513338 | 3.50233E-14 |
| PPP2R1A    | -0.0220495 | 3.50898E-14 |
| TMED2      | -0.0428762 | 3.57894E-14 |
| ODF2L      | -0.0579159 | 3.71224E-14 |
| EFCAB11    | 0.07259206 | 3.72383E-14 |
| CPLANE1    | 0.0924353  | 3.74385E-14 |
| COQ10B     | 0.04427116 | 3.746E-14   |
| BBS2       | 0.02707001 | 3.7462E-14  |
| KRT17      | -0.3324185 | 3.77552E-14 |
| THAP2      | 0.09948812 | 3.78333E-14 |
| PUM3       | 0.2060603  | 3.84769E-14 |
| MTPN       | -0.3136273 | 3.87504E-14 |
| ATRAID     | 0.02597087 | 3.88645E-14 |
| RENBP      | 0.07732885 | 3.88731E-14 |
| SNX29      | 0.05485184 | 3.88897E-14 |
| TIGD1      | 0.05799335 | 3.96918E-14 |
| C5orf22    | 0.03707581 | 4.01476E-14 |
| SKP1       | 0.30020415 | 4.02626E-14 |
| MRPL43     | 0.00738992 | 4.03208E-14 |
| RPF1       | -0.0025452 | 4.03903E-14 |
| ZNF277     | 0.09970499 | 4.05028E-14 |
| TYW1B      | 0.0843247  | 4.11114E-14 |
| MMRN1      | 0.11240849 | 4.11554E-14 |
| TAF4B      | 0.08344705 | 4.13244E-14 |
| LYRM4      | 0.01662509 | 4.18437E-14 |
| SORT1      | 0.00196529 | 4.18586E-14 |
| TSR2       | -0.1000816 | 4.20966E-14 |
| NIT2       | 0.17604067 | 4.23555E-14 |
| ZNF227     | 0.04596842 | 4.30078E-14 |
| FAM13A-AS1 | 0.03920073 | 4.31375E-14 |
| RPS6KA1    | 0.02950378 | 4.31865E-14 |
| GAMT       | -0.0682526 | 4.32755E-14 |
| N4BP2L1    | -0.0340695 | 4.33277E-14 |
| ZNF337     | -0.009596  | 4.35194E-14 |
| BRWD3      | 0.06915192 | 4.43278E-14 |
| STMP1      | 0.3061774  | 4.44675E-14 |
| STRIP1     | -0.0243765 | 4.46474E-14 |

|            |            |             |
|------------|------------|-------------|
| PATL1      | -0.0702903 | 4.53222E-14 |
| NPM3       | 0.04411391 | 4.53944E-14 |
| HIGD1A     | -0.0518473 | 4.55169E-14 |
| CIR1       | -0.2755684 | 4.58495E-14 |
| MAGED1     | -0.1052919 | 4.59366E-14 |
| UQCC1      | 0.07880172 | 4.59675E-14 |
| ST3GAL3    | 0.09743726 | 4.62359E-14 |
| FUT8       | 0.07552368 | 4.63372E-14 |
| KIAA0930   | 0.16452403 | 4.64148E-14 |
| PSMB5      | 0.02813864 | 4.67063E-14 |
| SCO1       | 0.08507809 | 4.69883E-14 |
| SQSTM1     | -0.4424014 | 4.72285E-14 |
| SP3        | -0.035326  | 4.74349E-14 |
| HELQ       | 0.0749995  | 4.8021E-14  |
| ERLIN2     | 0.04878224 | 4.81746E-14 |
| DUSP11     | -0.0957229 | 4.82453E-14 |
| SPATA5     | 0.1111282  | 4.83686E-14 |
| RBFA       | 0.07139733 | 4.85994E-14 |
| MAP3K11    | -0.2185657 | 4.87607E-14 |
| PGGT1B     | 0.12756348 | 4.91089E-14 |
| SH3D21     | 0.10568767 | 4.91899E-14 |
| TM2D3      | -0.1204722 | 4.91911E-14 |
| RANBP1     | 0.10305841 | 4.95548E-14 |
| EIF2B4     | 0.06801585 | 4.97183E-14 |
| TYMS       | -0.3073828 | 4.97532E-14 |
| ATF6B      | -0.0006057 | 5.03707E-14 |
| UTP4       | 0.07214004 | 5.05096E-14 |
| TTC7A      | 0.01792512 | 5.0561E-14  |
| KAT5       | -0.127501  | 5.0836E-14  |
| PPP1R11    | 0.01163379 | 5.11623E-14 |
| C5orf56    | 0.03418375 | 5.14574E-14 |
| SHQ1       | 0.08580422 | 5.16154E-14 |
| ZBED4      | 0.05209965 | 5.18478E-14 |
| CYB5B      | -0.0358482 | 5.20639E-14 |
| P3H1       | 0.06203772 | 5.21861E-14 |
| WBP2       | -0.0240841 | 5.22086E-14 |
| NME4       | 0.09310056 | 5.24067E-14 |
| GALNT11    | 0.1433823  | 5.2855E-14  |
| ZNF740     | 0.04679129 | 5.2915E-14  |
| CUL5       | -0.1390596 | 5.29369E-14 |
| OSBPL9     | -0.0562164 | 5.29843E-14 |
| PKM        | -0.1826462 | 5.30671E-14 |
| AP1S1      | 0.09686642 | 5.32528E-14 |
| QRSL1      | 0.10565045 | 5.32983E-14 |
| AP002387.2 | 0.09983612 | 5.33464E-14 |
| ETFDH      | 0.03991162 | 5.36673E-14 |
| CYFIP1     | 0.1251749  | 5.38193E-14 |
| CHMP1B     | 0.01064091 | 5.38725E-14 |
| FADS3      | -0.1890856 | 5.4095E-14  |
| CCL1       | -0.2017087 | 5.44234E-14 |

|          |            |             |
|----------|------------|-------------|
| ACAD9    | 0.04062184 | 5.47879E-14 |
| MAP2K4   | -0.1151223 | 5.47892E-14 |
| RAB40C   | 0.07909716 | 5.48401E-14 |
| UBE3C    | 0.10524906 | 5.51577E-14 |
| NUDT21   | -0.0016108 | 5.57786E-14 |
| RBM33    | -0.115954  | 5.58474E-14 |
| TOR3A    | 0.0323122  | 5.67644E-14 |
| ACAP1    | -0.2203532 | 5.72512E-14 |
| CATSPER2 | 0.11415573 | 5.75837E-14 |
| RHOT2    | -0.0282407 | 5.79637E-14 |
| TMEM120B | -0.0954157 | 5.7964E-14  |
| AP1M1    | 0.00129918 | 5.81694E-14 |
| PGRMC1   | -0.1111477 | 5.83534E-14 |
| MRPL17   | -0.0109989 | 5.87269E-14 |
| GTDC1    | 0.13127083 | 5.991E-14   |
| SYTL1    | -0.1782685 | 6.01605E-14 |
| NOL11    | 0.0298249  | 6.01633E-14 |
| FNTA     | 0.05156157 | 6.01679E-14 |
| TSTA3    | -0.1149344 | 6.06684E-14 |
| STIP1    | 0.06955209 | 6.08079E-14 |
| FGR      | -0.1728293 | 6.09098E-14 |
| VAV3     | 0.01317523 | 6.12799E-14 |
| PIP4K2A  | 0.1457204  | 6.16191E-14 |
| UBE2J2   | -0.0981369 | 6.2132E-14  |
| PREP     | 0.09550642 | 6.23403E-14 |
| PRNP     | -0.1746266 | 6.25474E-14 |
| MPHOSPH6 | 0.05543247 | 6.35171E-14 |
| PUS3     | 0.11787122 | 6.37753E-14 |
| PSMD10   | 0.02428974 | 6.38542E-14 |
| JRKL     | 0.12045573 | 6.48804E-14 |
| TOP3B    | 0.03523551 | 6.51696E-14 |
| GEMIN4   | 0.07991604 | 6.56415E-14 |
| NCLN     | -0.0503529 | 6.5715E-14  |
| TMEM160  | 0.04997347 | 6.59028E-14 |
| GTF3C2   | 0.02168409 | 6.60177E-14 |
| TATDN3   | -0.0173177 | 6.60676E-14 |
| NAP1L4   | 0.1086972  | 6.68902E-14 |
| HIPK2    | -0.063267  | 6.7274E-14  |
| PCNX1    | 0.09537823 | 6.73046E-14 |
| DST      | 0.18258658 | 6.73841E-14 |
| TP53INP1 | 0.11440841 | 6.77473E-14 |
| DELE1    | 0.04711097 | 6.77908E-14 |
| ZNF358   | 0.0912358  | 6.78668E-14 |
| EID1     | -0.2171273 | 6.78719E-14 |
| COX16    | 0.16388024 | 6.78948E-14 |
| FTL      | 0.29249858 | 6.79734E-14 |
| GDI1     | -0.1288736 | 6.81048E-14 |
| HK1      | -0.1394437 | 6.85793E-14 |
| PRR14    | -0.0888918 | 6.88841E-14 |
| ARHGAP1  | 0.03111499 | 6.91593E-14 |



|            |            |             |
|------------|------------|-------------|
| MMGT1      | 0.06425498 | 6.98415E-14 |
| SDR39U1    | -0.0747011 | 7.00081E-14 |
| ZNF354A    | 0.10758873 | 7.00538E-14 |
| EIF2AK2    | 0.13993749 | 7.04715E-14 |
| CD47       | -0.2727573 | 7.0788E-14  |
| CYSTM1     | -0.2230952 | 7.17963E-14 |
| BRAP       | -0.049566  | 7.22475E-14 |
| TNFAIP3    | 0.01358385 | 7.2814E-14  |
| ZSCAN29    | 0.06416537 | 7.28158E-14 |
| AL359644.1 | 0.05212455 | 7.29271E-14 |
| NAT14      | -0.1147698 | 7.29876E-14 |
| ZNF562     | 0.06241246 | 7.30758E-14 |
| UBL7-AS1   | 0.06170193 | 7.37633E-14 |
| GUSB       | -0.10623   | 7.42172E-14 |
| AC007383.2 | 0.07340967 | 7.4264E-14  |
| DDB1       | 0.01216512 | 7.47117E-14 |
| ELOA-AS1   | 0.06196235 | 7.49527E-14 |
| FAM102B    | -0.170224  | 7.51456E-14 |
| TUBB2A     | -0.1456387 | 7.51801E-14 |
| AP2A1      | 0.01918083 | 7.64329E-14 |
| EXT2       | 0.02539983 | 7.69842E-14 |
| TXLNA      | 0.0509899  | 7.71566E-14 |
| STUB1      | 0.0344558  | 7.73705E-14 |
| PRDM8      | -0.1634624 | 7.83409E-14 |
| KXD1       | 0.06523355 | 7.86355E-14 |
| ZKSCAN2-D  | 0.09588723 | 7.87543E-14 |
| CERT1      | -0.2421775 | 7.88009E-14 |
| LMF2       | -0.1509284 | 7.88581E-14 |
| RAI1       | -0.1056638 | 7.90223E-14 |
| PKP4       | 0.12624074 | 7.90837E-14 |
| DDX49      | -0.0400504 | 7.91777E-14 |
| ZNF621     | 0.04967839 | 7.96712E-14 |
| VAMP2      | -0.0545024 | 7.97624E-14 |
| ZNF92      | 0.10865776 | 7.97872E-14 |
| SETMAR     | 0.06069647 | 7.98822E-14 |
| WNK1       | 0.07411525 | 8.03859E-14 |
| PAIP1      | 0.06981658 | 8.04352E-14 |
| PREX1      | 0.05054531 | 8.05257E-14 |
| LTA4H      | 0.26069432 | 8.08406E-14 |
| RNASEH1    | -0.0501736 | 8.09377E-14 |
| PARP1      | 0.21631186 | 8.10117E-14 |
| UBL4A      | -0.1485992 | 8.13608E-14 |
| PSMC2      | -0.031146  | 8.14356E-14 |
| GANC       | 0.06797852 | 8.14519E-14 |
| RNF41      | -0.0719049 | 8.23227E-14 |
| TIMM10B    | -0.1347453 | 8.27347E-14 |
| ITPK1      | 0.09715464 | 8.28707E-14 |
| AC011447.3 | 0.0897938  | 8.29692E-14 |
| VEZF1      | -0.1824548 | 8.30279E-14 |
| LGALS9     | 0.09458835 | 8.31256E-14 |

|            |            |             |
|------------|------------|-------------|
| FIBP       | -0.0466858 | 8.34254E-14 |
| ZCCHC3     | 0.0724582  | 8.35211E-14 |
| GEMIN7     | 0.00753643 | 8.35652E-14 |
| FAM78A     | -0.0131889 | 8.42563E-14 |
| CDC14A     | -0.2201357 | 8.45808E-14 |
| ZNF641     | 0.07271794 | 8.52745E-14 |
| NDRG3      | 0.04406375 | 8.54539E-14 |
| ZNF354B    | 0.09145872 | 8.5618E-14  |
| IFNAR1     | -0.0079087 | 8.60368E-14 |
| SDHA       | 0.02374873 | 8.64646E-14 |
| USP53      | -0.0490212 | 8.65174E-14 |
| MFNG       | 0.01185703 | 8.68449E-14 |
| KLHDC8B    | 0.0517654  | 8.71536E-14 |
| SMG6       | -0.0106946 | 8.72354E-14 |
| MRPS17     | 0.10111305 | 8.76202E-14 |
| NUSAP1     | 0.05853321 | 8.80643E-14 |
| PGBD2      | 0.06030515 | 8.86361E-14 |
| TNPO2      | 0.03686445 | 8.88651E-14 |
| RNF111     | -0.1109035 | 8.95684E-14 |
| EPM2A      | 0.08389579 | 9.05702E-14 |
| TP53I11    | -0.1545833 | 9.23451E-14 |
| CBLL1      | 0.01741071 | 9.2461E-14  |
| SEC61A1    | -0.0624641 | 9.27881E-14 |
| ZNF606     | 0.06423472 | 9.28334E-14 |
| HLA-DMA    | -0.2477491 | 9.30062E-14 |
| SRA1       | -0.1647808 | 9.46318E-14 |
| BCAP29     | 0.02252752 | 9.54104E-14 |
| MARCH5     | -0.0277123 | 9.59159E-14 |
| ILVBL      | 0.01641888 | 9.6854E-14  |
| MED15      | -0.1367073 | 9.69728E-14 |
| SURF4      | -0.0801247 | 9.81052E-14 |
| HIF1A-AS3  | 0.06752033 | 9.826E-14   |
| PRRC1      | 0.01146169 | 9.8366E-14  |
| AC011043.1 | 0.08132531 | 9.92191E-14 |
| GNG10      | -0.0082227 | 1.0132E-13  |
| P2RY11     | 0.04903044 | 1.01505E-13 |
| SCAF1      | -0.0594768 | 1.01773E-13 |
| FAM234A    | 0.06406135 | 1.01814E-13 |
| AK9        | 0.12555768 | 1.02161E-13 |
| JPT2       | -0.0376191 | 1.02553E-13 |
| NUDT14     | 0.112541   | 1.02635E-13 |
| BICRAL     | 0.11330217 | 1.03093E-13 |
| ARIH2      | 0.0105484  | 1.03607E-13 |
| OSTC       | 0.22582381 | 1.03901E-13 |
| CARHSP1    | -0.1671726 | 1.05029E-13 |
| MT1X       | 0.05214465 | 1.05733E-13 |
| AC016773.1 | 0.03309961 | 1.08249E-13 |
| HECTD4     | 0.0374082  | 1.08539E-13 |
| SNHG19     | 0.109259   | 1.09185E-13 |
| TOLLIP     | -0.1028748 | 1.0945E-13  |

|            |            |             |
|------------|------------|-------------|
| TUBA1B     | -0.5753349 | 1.10063E-13 |
| ARHGEF40   | 0.03143339 | 1.10091E-13 |
| FDPS       | 0.05131494 | 1.10201E-13 |
| NDST2      | -0.1632286 | 1.10313E-13 |
| AC118549.1 | 0.11191957 | 1.11734E-13 |
| MTFR1L     | 0.05654245 | 1.11793E-13 |
| SYNGR2     | 0.10765651 | 1.12047E-13 |
| PPP2R5C    | -0.0526194 | 1.12579E-13 |
| CPVL       | 0.26837848 | 1.13411E-13 |
| E2F4       | 0.02414028 | 1.13798E-13 |
| SNRNP35    | -0.0421066 | 1.15843E-13 |
| AL354740.1 | 0.08029869 | 1.15875E-13 |
| OXNAD1     | 0.06639756 | 1.16265E-13 |
| PARP10     | 0.04451666 | 1.1668E-13  |
| NOM1       | 0.07204193 | 1.16737E-13 |
| BNIP3L     | -0.1452091 | 1.17127E-13 |
| PRIMPOL    | 0.09719379 | 1.17685E-13 |
| FOXRED1    | 0.0305463  | 1.17719E-13 |
| TCERG1     | 0.08838957 | 1.18027E-13 |
| RAP2B      | 0.0117344  | 1.19191E-13 |
| ATF2       | -0.0719995 | 1.19399E-13 |
| ZNF528-AS1 | 0.11911773 | 1.19403E-13 |
| CBWD3      | 0.09472143 | 1.20296E-13 |
| SPEN       | -0.0244304 | 1.20358E-13 |
| METTL21A   | -0.0097947 | 1.20414E-13 |
| LDLRAD2    | -0.2065411 | 1.20677E-13 |
| ZNF594     | 0.0786962  | 1.20717E-13 |
| CCDC124    | -0.0160375 | 1.21022E-13 |
| ACAP3      | -0.1335732 | 1.21369E-13 |
| SIRT2      | -0.1207895 | 1.22132E-13 |
| IDH3B      | -0.0418917 | 1.22603E-13 |
| TOMM70     | 0.06696637 | 1.2328E-13  |
| SEC63      | 0.13046869 | 1.23659E-13 |
| REX1BD     | -0.0625362 | 1.2381E-13  |
| PRMT7      | 0.0900009  | 1.24595E-13 |
| PCYT2      | 0.08106948 | 1.25337E-13 |
| CENPW      | -0.0405913 | 1.2573E-13  |
| SASS6      | 0.13199536 | 1.25767E-13 |
| SUGT1      | 0.13111934 | 1.26274E-13 |
| DCAF16     | 0.03364603 | 1.29415E-13 |
| TSPAN32    | -0.169367  | 1.30389E-13 |
| ZNF274     | -0.0606997 | 1.30425E-13 |
| SPRYD4     | 0.07122819 | 1.317E-13   |
| FUNDC2     | 0.0327637  | 1.31821E-13 |
| SF3B1      | -0.2952477 | 1.32568E-13 |
| GABPB1-IT1 | 0.0165011  | 1.32594E-13 |
| ATP6AP1    | -0.0157152 | 1.33334E-13 |
| SCARF1     | -0.1321504 | 1.33671E-13 |
| POLR2M     | 0.04405368 | 1.34593E-13 |
| TEX2       | 0.05512818 | 1.35039E-13 |

|            |            |             |
|------------|------------|-------------|
| HSPBAP1    | 0.06434027 | 1.35735E-13 |
| ZNF717     | 0.06960577 | 1.36589E-13 |
| TRIM11     | -0.0713315 | 1.37156E-13 |
| CDC27      | -0.0876762 | 1.38771E-13 |
| HTRA2      | -0.0015093 | 1.3891E-13  |
| CNOT10     | -0.0110994 | 1.4114E-13  |
| KMT5B      | -0.0423354 | 1.41244E-13 |
| CDK12      | -0.0529024 | 1.41672E-13 |
| RAB8A      | -0.0093265 | 1.41783E-13 |
| GPANK1     | -0.0144007 | 1.41992E-13 |
| CAB39      | -0.0418895 | 1.42159E-13 |
| SDCCAG8    | 0.23329529 | 1.4357E-13  |
| MCTP2      | -0.0600767 | 1.43852E-13 |
| CDK13      | 0.15700316 | 1.44046E-13 |
| MIB2       | -0.0282416 | 1.44065E-13 |
| ZNF654     | -0.0253317 | 1.44142E-13 |
| MAVS       | -0.0674561 | 1.45451E-13 |
| ISY1       | 0.04691047 | 1.46077E-13 |
| DGUOK      | -0.0272739 | 1.46289E-13 |
| KIFAP3     | -0.0588313 | 1.47609E-13 |
| PTCD2      | 0.07859295 | 1.47849E-13 |
| ACAA1      | -0.1128119 | 1.47959E-13 |
| ZNF394     | -0.1246398 | 1.48149E-13 |
| NBEAL1     | 0.08624582 | 1.4824E-13  |
| POC1B      | -0.0759025 | 1.49481E-13 |
| IRAK2      | -0.1412225 | 1.50149E-13 |
| ZNF529-AS1 | 0.07149698 | 1.51002E-13 |
| AZIN1      | 0.00759966 | 1.51258E-13 |
| CTSF       | 0.03320955 | 1.52159E-13 |
| TIPRL      | -0.022093  | 1.53004E-13 |
| NDUFB10    | 0.20400883 | 1.5311E-13  |
| SMYD4      | 0.07535861 | 1.53962E-13 |
| NIPSNAP3A  | 0.02696425 | 1.54417E-13 |
| VPS25      | 0.03060371 | 1.56734E-13 |
| MRPL2      | 0.05017225 | 1.5719E-13  |
| GLRX2      | -0.0737724 | 1.57933E-13 |
| TFB1M      | 0.04031263 | 1.58055E-13 |
| MOB2       | -0.0703059 | 1.5866E-13  |
| NEDD1      | -0.0013105 | 1.59755E-13 |
| CERS5      | -0.0167198 | 1.6112E-13  |
| SNRNP48    | 0.0274845  | 1.62199E-13 |
| NCOA5      | 0.06872069 | 1.64472E-13 |
| AC027097.1 | 0.0983742  | 1.64986E-13 |
| AC016747.1 | -0.1409826 | 1.65328E-13 |
| ELAVL1     | -0.0279689 | 1.65383E-13 |
| LIN54      | -0.0005573 | 1.65535E-13 |
| AC093157.1 | 0.08749837 | 1.66463E-13 |
| CRELD2     | -0.1236213 | 1.6737E-13  |
| ELOA       | 0.02359925 | 1.68043E-13 |
| FUNDC1     | 0.10043108 | 1.69225E-13 |

|           |            |             |
|-----------|------------|-------------|
| TDP2      | -0.0063673 | 1.69506E-13 |
| FAM53C    | 0.05081012 | 1.69795E-13 |
| CCDC57    | 0.04574582 | 1.69842E-13 |
| FAM210A   | -0.0480048 | 1.70225E-13 |
| TMLHE     | 0.02646909 | 1.70622E-13 |
| TMEM91    | -0.161491  | 1.72491E-13 |
| OCIAD2    | -0.1319563 | 1.73026E-13 |
| COPS7B    | 0.00221927 | 1.73416E-13 |
| COX19     | -0.0608811 | 1.74079E-13 |
| DSTYK     | -0.2288822 | 1.74195E-13 |
| TRIOBP    | -0.0929805 | 1.78434E-13 |
| TMEM159   | 0.09406658 | 1.78572E-13 |
| UGGT2     | 0.06379277 | 1.78612E-13 |
| DIPK1B    | 0.08000447 | 1.79245E-13 |
| HELLPAR   | 0.15336909 | 1.79614E-13 |
| INPP5D    | 0.15746403 | 1.83697E-13 |
| CISD3     | 0.07835741 | 1.8376E-13  |
| CTBP2     | -0.1030832 | 1.84734E-13 |
| USPL1     | 0.06427595 | 1.85332E-13 |
| CHMP3     | -0.0238271 | 1.86658E-13 |
| ZNF345    | 0.06592154 | 1.88363E-13 |
| TMC8      | 0.0867055  | 1.89079E-13 |
| TCEAL1    | 0.1176391  | 1.89261E-13 |
| RAB11FIP2 | 0.11830057 | 1.90065E-13 |
| IDNK      | 0.14606689 | 1.90168E-13 |
| ABHD17A   | -0.1846955 | 1.90572E-13 |
| ELF4      | -0.1781763 | 1.90958E-13 |
| ZNF395    | -0.1983623 | 1.90998E-13 |
| GLE1      | 0.07664445 | 1.91135E-13 |
| GSDMD     | 0.0148063  | 1.94375E-13 |
| MAP2K5    | 0.03564526 | 1.94858E-13 |
| THADA     | 0.15089595 | 1.96451E-13 |
| RAB9A     | 0.07690665 | 1.97335E-13 |
| SRPK2     | 0.10176923 | 1.98159E-13 |
| JAGN1     | -0.0795786 | 1.99871E-13 |
| ARL5B     | 0.05328591 | 2.00022E-13 |
| ST3GAL2   | -0.0154231 | 2.01831E-13 |
| KRBA2     | 0.05631934 | 2.04539E-13 |
| HMBOX1    | 0.08334949 | 2.0523E-13  |
| KIF20B    | 0.20479943 | 2.05547E-13 |
| CUL3      | -0.1581633 | 2.06836E-13 |
| PHC3      | 0.04113897 | 2.07578E-13 |
| SARNP     | -0.1402836 | 2.08337E-13 |
| SUN2      | 0.00195103 | 2.09303E-13 |
| WIZ       | 0.01294986 | 2.09643E-13 |
| EEF1AKMT3 | 0.06750803 | 2.10127E-13 |
| CROT      | 0.10870158 | 2.10725E-13 |
| PQBP1     | 0.12658412 | 2.11455E-13 |
| CDK5      | 0.04850318 | 2.12956E-13 |
| RFWD3     | 0.01497084 | 2.13535E-13 |

|            |            |             |
|------------|------------|-------------|
| GPBP1L1    | -0.0817599 | 2.14525E-13 |
| R3HCC1     | -0.0079111 | 2.14987E-13 |
| LRRCC1     | 0.13285812 | 2.16133E-13 |
| YKT6       | -0.037974  | 2.16921E-13 |
| WDR43      | 0.25511194 | 2.17103E-13 |
| SUPV3L1    | -0.0894474 | 2.17562E-13 |
| LINC00863  | 0.05559363 | 2.17735E-13 |
| IRF2       | -0.0020987 | 2.18079E-13 |
| NUDT5      | -0.0274482 | 2.18562E-13 |
| CINP       | 0.00524002 | 2.18828E-13 |
| AC093297.2 | 0.07855306 | 2.20641E-13 |
| DYM        | 0.10614087 | 2.22113E-13 |
| DNM2       | -0.0006657 | 2.23796E-13 |
| ACSL5      | 0.09390898 | 2.24479E-13 |
| STX7       | 0.23126162 | 2.25439E-13 |
| TCHP       | 0.08378256 | 2.2583E-13  |
| TMEM167A   | -0.1266181 | 2.26146E-13 |
| CCNG2      | 0.04168798 | 2.27325E-13 |
| DCAF6      | 0.00522926 | 2.28411E-13 |
| CYP1B1     | 0.25167635 | 2.28512E-13 |
| STK26      | 0.22705579 | 2.30574E-13 |
| ADPGK      | 0.02819132 | 2.31347E-13 |
| USP34      | 0.16145876 | 2.34451E-13 |
| AEBP2      | -0.0214758 | 2.34452E-13 |
| NIP7       | -0.0520945 | 2.34938E-13 |
| NDST1      | 0.06567016 | 2.35452E-13 |
| TIMM50     | -0.0018558 | 2.35817E-13 |
| MBD6       | -0.0040261 | 2.40102E-13 |
| MACO1      | -0.0409716 | 2.40368E-13 |
| PIGU       | 0.04685892 | 2.44164E-13 |
| NOCT       | 0.06723541 | 2.4752E-13  |
| AP2M1      | -0.1553241 | 2.51774E-13 |
| AC008267.5 | 0.06300599 | 2.5184E-13  |
| CWC22      | -0.1197953 | 2.53817E-13 |
| MBD3       | 0.09408287 | 2.55163E-13 |
| FAM120C    | 0.04639872 | 2.55861E-13 |
| PSENN      | 0.02247019 | 2.56036E-13 |
| TUBD1      | 0.03258084 | 2.56661E-13 |
| SLC25A28   | -0.0358318 | 2.57134E-13 |
| DCUN1D5    | -0.0685497 | 2.57682E-13 |
| GAR1       | 0.1277519  | 2.58207E-13 |
| CHD1L      | 0.09270418 | 2.5883E-13  |
| HDAC10     | -0.0021462 | 2.59475E-13 |
| SLC45A3    | 0.18524554 | 2.61542E-13 |
| ELF2       | -0.1365739 | 2.62147E-13 |
| MRPL55     | 0.1363107  | 2.62193E-13 |
| LRRRC8D    | 0.0077418  | 2.62207E-13 |
| TPR        | 0.2678547  | 2.64591E-13 |
| IFT22      | -0.1523293 | 2.65164E-13 |
| AC010618.3 | 0.08627332 | 2.66522E-13 |

|            |            |             |
|------------|------------|-------------|
| UBE2E1     | -0.0442392 | 2.66731E-13 |
| YIPF1      | 0.04948544 | 2.67276E-13 |
| ATP1B3     | 0.04064315 | 2.69918E-13 |
| BCL7A      | 0.05180695 | 2.69923E-13 |
| POP7       | -0.0074898 | 2.70251E-13 |
| INO80D     | 0.08108604 | 2.70322E-13 |
| AKAP7      | 0.10244196 | 2.70423E-13 |
| LTBP4      | 0.08448457 | 2.71283E-13 |
| BRD2       | -0.1154625 | 2.71526E-13 |
| ELP6       | 0.05179232 | 2.72816E-13 |
| PMPCA      | -0.064367  | 2.73863E-13 |
| RPP38      | -0.0526904 | 2.76935E-13 |
| JDP2       | -0.0036327 | 2.79387E-13 |
| ZFAND1     | 0.15027563 | 2.85299E-13 |
| IMPDH1     | 0.00857822 | 2.87409E-13 |
| RPP14      | 0.06426672 | 2.89101E-13 |
| TRAPPC2L   | 0.03589096 | 2.89911E-13 |
| NCAPD2     | 0.08464682 | 2.90045E-13 |
| NRM        | -0.1511418 | 2.90372E-13 |
| AL133453.1 | 0.03837913 | 2.91394E-13 |
| WBP1       | -0.1071128 | 2.92934E-13 |
| ZNF875     | 0.03738206 | 2.94791E-13 |
| PLTP       | -0.1349272 | 2.98785E-13 |
| PINX1      | 0.09814375 | 2.99313E-13 |
| FAM117B    | 0.08560205 | 2.99712E-13 |
| COX17      | 0.06748085 | 3.00404E-13 |
| LINC02019  | 0.02819482 | 3.02292E-13 |
| ABRAXAS2   | -0.1171004 | 3.04031E-13 |
| GATM       | 0.06662142 | 3.05425E-13 |
| NUTM2B-AS  | 0.13914361 | 3.06582E-13 |
| NOL9       | 0.03763649 | 3.09321E-13 |
| LINC00539  | 0.05574905 | 3.15557E-13 |
| DHRS4-AS1  | 0.08985817 | 3.15559E-13 |
| CAPRIN2    | 0.07920386 | 3.19903E-13 |
| ZFR        | -0.1549881 | 3.22235E-13 |
| HSCB       | 0.14915918 | 3.22983E-13 |
| ETNK1      | 0.1555098  | 3.24387E-13 |
| ATP6V1H    | -0.0308567 | 3.25734E-13 |
| EFNB1      | -0.1366007 | 3.258E-13   |
| MXD1       | 0.14769825 | 3.27247E-13 |
| AP3D1      | 0.05424363 | 3.28577E-13 |
| ADAR       | 0.00163464 | 3.30514E-13 |
| HSPA4      | 0.00678785 | 3.3107E-13  |
| RNF217     | 0.06087523 | 3.33922E-13 |
| ZNF567     | 0.05487024 | 3.349E-13   |
| SNU13      | -0.2280901 | 3.36081E-13 |
| ELMOD3     | 0.06496818 | 3.38103E-13 |
| YIPF5      | -0.0767781 | 3.40115E-13 |
| PKN2       | -0.1512533 | 3.404E-13   |
| GBF1       | 0.00525252 | 3.42554E-13 |

|             |            |             |
|-------------|------------|-------------|
| RALGPS2     | 0.06497058 | 3.4438E-13  |
| PTS         | -0.1756516 | 3.45602E-13 |
| CUL9        | 0.01770918 | 3.46544E-13 |
| MLLT6       | 0.06832346 | 3.46822E-13 |
| SNHG17      | 0.11095618 | 3.51705E-13 |
| SLC39A7     | 0.00011738 | 3.52158E-13 |
| INO80B      | 0.05591862 | 3.55213E-13 |
| BX664615.2  | 0.04800197 | 3.555E-13   |
| TIMM29      | -0.0102203 | 3.57478E-13 |
| BBS10       | 0.06086794 | 3.59381E-13 |
| C2orf68     | 0.03419967 | 3.59776E-13 |
| ZNF689      | 0.00238534 | 3.61633E-13 |
| PLD1        | 0.13236187 | 3.62168E-13 |
| CSTF3       | 0.07578777 | 3.63257E-13 |
| TSEN15      | 0.05197386 | 3.64586E-13 |
| MBTPS1      | 0.09729588 | 3.68466E-13 |
| AC005921.2  | -0.002752  | 3.68482E-13 |
| AIMP2       | 0.06305163 | 3.71449E-13 |
| DRG2        | 0.05921594 | 3.73698E-13 |
| LPIN1       | -0.1515989 | 3.74199E-13 |
| LPCAT4      | 0.03291032 | 3.74686E-13 |
| CUTA        | 0.23005028 | 3.76314E-13 |
| TPRG1L      | -0.0754272 | 3.79851E-13 |
| TMEM101     | 0.09656255 | 3.81664E-13 |
| ESF1        | 0.22906277 | 3.82836E-13 |
| TMED4       | -0.1053412 | 3.82974E-13 |
| CAMK2G      | 0.03645795 | 3.83639E-13 |
| HAUS7       | 0.07545208 | 3.84549E-13 |
| AAAS        | 0.04899442 | 3.88655E-13 |
| RBM15B      | -0.0861156 | 3.89193E-13 |
| TRIM47      | -0.1007209 | 3.90507E-13 |
| RAB35       | -0.1223225 | 3.92151E-13 |
| IER5        | -0.2323981 | 3.94535E-13 |
| PSMD3       | 0.00794696 | 3.98897E-13 |
| PIGT        | -0.1245349 | 4.04231E-13 |
| PRKCB       | -0.0547827 | 4.05261E-13 |
| N4BP2L2-IT2 | 0.07409724 | 4.05753E-13 |
| GABARAPL1   | -0.1083877 | 4.0707E-13  |
| KCNC4       | 0.13476909 | 4.07796E-13 |
| SETX        | -0.0778135 | 4.08617E-13 |
| SUPT6H      | -0.0993565 | 4.09981E-13 |
| RAB27A      | 0.20424564 | 4.12799E-13 |
| TGS1        | 0.02450256 | 4.14844E-13 |
| ZDHHC24     | -0.011168  | 4.15059E-13 |
| VHL         | -0.0141478 | 4.15799E-13 |
| YIPF2       | -0.0436423 | 4.17685E-13 |
| THOC5       | 0.06667455 | 4.23349E-13 |
| TAS2R4      | 0.09523177 | 4.23785E-13 |
| CD55        | -0.2511275 | 4.29943E-13 |
| NAGLU       | 0.01488465 | 4.32139E-13 |



|           |            |             |
|-----------|------------|-------------|
| HMOX1     | 0.0777334  | 4.3299E-13  |
| BRAF      | -0.2149013 | 4.3326E-13  |
| PRDM16-DT | 0.05783883 | 4.36309E-13 |
| CCDC32    | 0.01774153 | 4.44533E-13 |
| GOLGA3    | 0.06699591 | 4.45935E-13 |
| MTERF1    | 0.06949672 | 4.5002E-13  |
| BORCS5    | 0.08411627 | 4.50381E-13 |
| POLR2J    | 0.09538313 | 4.512E-13   |
| MRPS7     | -0.0445162 | 4.51829E-13 |
| NEPRO     | 0.06543582 | 4.53661E-13 |
| TMEM179B  | 0.02558369 | 4.62947E-13 |
| DDRKG1    | -0.0375277 | 4.6377E-13  |
| ZNHIT1    | 0.1433248  | 4.64658E-13 |
| ICE1      | 0.00035538 | 4.65566E-13 |
| KLHDC2    | -0.0283151 | 4.66618E-13 |
| SMDT1     | -0.1020753 | 4.76245E-13 |
| MINPP1    | 0.08860504 | 4.76897E-13 |
| MYCBP     | 0.09370102 | 4.7842E-13  |
| HMG4      | -0.0442823 | 4.80462E-13 |
| BMT2      | 0.03299747 | 4.84321E-13 |
| ANKS1A    | -0.0510949 | 4.88374E-13 |
| FOXK2     | 0.02254798 | 4.90973E-13 |
| ALG10     | 0.05267261 | 4.91419E-13 |
| PEX1      | 0.06889594 | 4.96257E-13 |
| LUC7L2    | -0.1404276 | 4.98114E-13 |
| PAPOLG    | -0.0011523 | 5.17587E-13 |
| DDX59     | 0.00631003 | 5.17977E-13 |
| PDE4D     | -0.0643748 | 5.18129E-13 |
| ZDHHC4    | 0.05669549 | 5.22214E-13 |
| NEMP1     | 0.0920509  | 5.22862E-13 |
| FBXL4     | 0.07243602 | 5.33776E-13 |
| POLR2J2   | 0.03321479 | 5.3513E-13  |
| PIK3CA    | -0.1694777 | 5.36291E-13 |
| PARVB     | -0.1445637 | 5.39901E-13 |
| COQ7      | 0.01712495 | 5.39922E-13 |
| FBXO7     | -0.1506696 | 5.40908E-13 |
| TCF3      | 0.09416529 | 5.45898E-13 |
| FBXO38    | -0.0522426 | 5.45958E-13 |
| GGA3      | 0.02182192 | 5.46782E-13 |
| VMA21     | 0.10796972 | 5.46855E-13 |
| SNHG5     | 0.25310934 | 5.47236E-13 |
| KIN       | -0.0282447 | 5.48216E-13 |
| NAA60     | -0.100602  | 5.49613E-13 |
| TYK2      | 0.00690631 | 5.49649E-13 |
| ATP7A     | 0.12685822 | 5.50019E-13 |
| MXD4      | -0.2064178 | 5.53801E-13 |
| EPDR1     | -0.0351694 | 5.54403E-13 |
| FIG4      | 0.07359565 | 5.54866E-13 |
| FAM162A   | 0.15216601 | 5.58063E-13 |
| RPP30     | 0.03045499 | 5.58576E-13 |

|            |            |             |
|------------|------------|-------------|
| POLG       | -0.0095758 | 5.59819E-13 |
| PDXP       | 0.08035536 | 5.61538E-13 |
| NR2F6      | 0.08333174 | 5.62216E-13 |
| ZFPL1      | -0.0254608 | 5.63418E-13 |
| FASTK      | -0.0814034 | 5.63949E-13 |
| ZDHHC7     | -0.0930272 | 5.65406E-13 |
| SNIP1      | -0.0289151 | 5.66626E-13 |
| HDDC3      | 0.08419336 | 5.73587E-13 |
| GRAMD4     | 0.06870772 | 5.77356E-13 |
| EPC1       | 0.12282513 | 5.82727E-13 |
| MPRIP      | 0.05802476 | 5.85961E-13 |
| PALB2      | 0.07145098 | 5.86793E-13 |
| FPGS       | -0.0364712 | 5.91588E-13 |
| NKAP       | 0.09354424 | 5.9214E-13  |
| TCEANC2    | 0.13211597 | 5.95025E-13 |
| DFFA       | 0.13906161 | 5.9698E-13  |
| CCDC138    | 0.0437054  | 5.9711E-13  |
| CCDC180    | 0.07863539 | 5.97121E-13 |
| LINC01500  | 0.05725514 | 5.99072E-13 |
| AC093227.1 | 0.0583501  | 6.14376E-13 |
| NFKB2      | -0.2266762 | 6.18922E-13 |
| GATAD2B    | 0.02505537 | 6.19522E-13 |
| SIRT5      | 0.08371604 | 6.21402E-13 |
| POLR2K     | 0.03843679 | 6.23961E-13 |
| CHORDC1    | 0.07470471 | 6.26382E-13 |
| TRIM65     | 0.05105401 | 6.28648E-13 |
| FAM114A2   | 0.10993851 | 6.38775E-13 |
| TRMT1      | 0.00494319 | 6.40757E-13 |
| PTPN18     | 0.08262347 | 6.40838E-13 |
| MROH6      | 0.07149969 | 6.43493E-13 |
| ZFAND2B    | 0.02992377 | 6.44968E-13 |
| FSD1L      | -0.180001  | 6.46501E-13 |
| TMEM250    | -0.0407684 | 6.46603E-13 |
| FBXO45     | -0.040176  | 6.52225E-13 |
| CCDC173    | -0.1349127 | 6.53341E-13 |
| TEDC1      | -0.1554658 | 6.53562E-13 |
| EI24       | -0.0359646 | 6.56645E-13 |
| BCR        | -0.0625734 | 6.58438E-13 |
| CLSTN3     | -0.023463  | 6.62555E-13 |
| SWI5       | 0.06793983 | 6.64658E-13 |
| ZKSCAN3    | 0.03823113 | 6.68852E-13 |
| SAP30      | 0.03992917 | 6.69101E-13 |
| GLCE       | 0.08560877 | 6.69699E-13 |
| LEMD2      | -0.0181138 | 6.71866E-13 |
| LPCAT1     | 0.07885061 | 6.76943E-13 |
| IFT43      | -0.0400869 | 6.78493E-13 |
| SLC25A13   | 0.00762784 | 6.81112E-13 |
| SLC25A16   | 0.01337425 | 6.82889E-13 |
| MTMR14     | -0.0350129 | 6.84423E-13 |
| MDM2       | 0.09299944 | 6.8644E-13  |

|            |            |             |
|------------|------------|-------------|
| C12orf75   | -0.2448742 | 6.87139E-13 |
| ING2       | -0.018416  | 6.92989E-13 |
| STX18      | 0.03101304 | 6.93507E-13 |
| CLASP1     | 0.0973771  | 6.95263E-13 |
| PXN-AS1    | 0.07745539 | 6.96885E-13 |
| MRPS35     | 0.00246038 | 6.98057E-13 |
| TRIM33     | -0.1021364 | 6.99674E-13 |
| MYO1F      | -0.0955477 | 7.01261E-13 |
| LSM12      | -0.0587999 | 7.06156E-13 |
| GATB       | 0.05304898 | 7.09633E-13 |
| CHMP5      | 0.22623867 | 7.10937E-13 |
| ZNRD1      | 0.09691385 | 7.11705E-13 |
| FAS        | -0.1468085 | 7.14667E-13 |
| HYAL3      | 0.09998423 | 7.15056E-13 |
| MRPS23     | 0.05398507 | 7.17434E-13 |
| SCCPDH     | 0.19818953 | 7.18915E-13 |
| CLCN3      | -0.0039764 | 7.19164E-13 |
| PTGIR      | -0.1941603 | 7.26122E-13 |
| MDP1       | -0.0035464 | 7.26616E-13 |
| CCDC28B    | -0.1374492 | 7.30409E-13 |
| MHENCN     | -0.1278709 | 7.3208E-13  |
| COX5B      | -0.2255594 | 7.37484E-13 |
| LNX2       | -0.0723078 | 7.39684E-13 |
| UBR3       | 0.08694165 | 7.39904E-13 |
| SLC7A1     | -0.0663577 | 7.4063E-13  |
| DCAF15     | -0.1325448 | 7.45247E-13 |
| ANKRD16    | 0.08946153 | 7.46978E-13 |
| C2orf49    | 0.05811235 | 7.52695E-13 |
| ERGIC3     | 0.05810161 | 7.53485E-13 |
| ZNF687     | -0.0099512 | 7.58085E-13 |
| FUT7       | 0.08022007 | 7.58728E-13 |
| TWISTNB    | -0.0685116 | 7.62409E-13 |
| IL9R       | 0.05933731 | 7.68175E-13 |
| NMD3       | 0.00389408 | 7.68907E-13 |
| NUP188     | 0.08000303 | 7.73981E-13 |
| BICD2      | -0.1408923 | 7.78071E-13 |
| PPIL2      | 0.0160695  | 7.79966E-13 |
| ANAPC10    | -0.0163635 | 7.80129E-13 |
| ASAP1      | 0.10874654 | 7.85198E-13 |
| ARRDC3     | -0.2316946 | 7.87813E-13 |
| METTL18    | 0.13151955 | 7.89229E-13 |
| MFSD10     | -0.1688162 | 7.96174E-13 |
| ZBTB6      | 0.05910597 | 7.96482E-13 |
| FAM133B    | -0.2045984 | 7.98137E-13 |
| TRAF6      | -0.0741835 | 7.98613E-13 |
| TAF8       | -0.002892  | 8.09289E-13 |
| ZC3H12C    | 0.01942602 | 8.09722E-13 |
| SYNRG      | 0.09827264 | 8.10982E-13 |
| AC107464.3 | -0.0476578 | 8.12346E-13 |
| FANCL      | 0.08467685 | 8.15565E-13 |

|            |            |             |
|------------|------------|-------------|
| RFC5       | 0.05208149 | 8.15674E-13 |
| TMEM71     | -0.1091116 | 8.31313E-13 |
| TLR1       | 0.03107511 | 8.43988E-13 |
| RABGAP1L   | 0.02638318 | 8.44034E-13 |
| KDM3A      | -0.0588862 | 8.48485E-13 |
| COX14      | -0.0580379 | 8.50597E-13 |
| APOE       | 0.06891385 | 8.52057E-13 |
| NUDT22     | 0.04246582 | 8.54004E-13 |
| FRMD4B     | -0.2555382 | 8.55423E-13 |
| UNC119     | 0.00388183 | 8.59053E-13 |
| CNIH1      | -0.0586011 | 8.59966E-13 |
| BRD4       | -0.086425  | 8.6216E-13  |
| AP3M1      | 0.05483619 | 8.63424E-13 |
| ZBTB14     | 0.07490753 | 8.68941E-13 |
| OXA1L      | 0.06591394 | 8.70068E-13 |
| FKBP7      | 0.06206835 | 8.71334E-13 |
| ISYNA1     | -0.0650138 | 8.71777E-13 |
| DDX60      | 0.07000053 | 8.72879E-13 |
| ATP5PB     | -0.2250561 | 8.77353E-13 |
| COPS6      | -0.0995433 | 8.82601E-13 |
| MRPS24     | 0.15218387 | 8.84007E-13 |
| MGAT4B     | -0.168622  | 8.85738E-13 |
| IFIT5      | 0.04679389 | 8.88738E-13 |
| AC090114.2 | -0.1185096 | 8.91388E-13 |
| POLR1E     | 0.09851908 | 8.92866E-13 |
| CRNDE      | 0.13916425 | 9.00267E-13 |
| DDX41      | 0.07415858 | 9.04286E-13 |
| ZNF160     | -0.1169297 | 9.09065E-13 |
| LRRC47     | 0.07364103 | 9.09675E-13 |
| BRD1       | -0.1046209 | 9.21878E-13 |
| CMAS       | 0.0160632  | 9.25217E-13 |
| VRK1       | 0.10422024 | 9.26626E-13 |
| UBL3       | -0.0378328 | 9.29855E-13 |
| MRPL42     | 0.18904735 | 9.33578E-13 |
| CLIC4      | -0.1645161 | 9.37591E-13 |
| NEK1       | 0.08717637 | 9.4744E-13  |
| POLDIP2    | 0.00735843 | 9.51584E-13 |
| PCBD2      | 0.13056244 | 9.68113E-13 |
| VAV1       | 0.02506202 | 9.71792E-13 |
| RMDN3      | 0.02879834 | 9.79685E-13 |
| MLF1       | -0.1130795 | 9.85907E-13 |
| BRPF1      | -0.0590553 | 9.86306E-13 |
| SPOPL      | -0.0099138 | 9.86709E-13 |
| BLOC1S6    | 0.12838297 | 9.90393E-13 |
| DNAJA3     | 0.0752682  | 9.93237E-13 |
| GSR        | 0.07766473 | 9.95847E-13 |
| BCL2L2     | 0.07120503 | 9.98593E-13 |
| TMBIM1     | -0.1715725 | 9.99335E-13 |
| DDB2       | -0.1295915 | 1.00348E-12 |
| MFSD14B    | 0.03959687 | 1.00604E-12 |

|           |            |             |
|-----------|------------|-------------|
| POLB      | -0.0190618 | 1.00808E-12 |
| GLA       | 0.03128279 | 1.01333E-12 |
| DCTN4     | -0.1635711 | 1.01339E-12 |
| ETAA1     | 0.08066665 | 1.01659E-12 |
| DIP2B     | 0.08201156 | 1.02873E-12 |
| SPOUT1    | 0.07969066 | 1.02968E-12 |
| RAB5B     | 0.0381868  | 1.03531E-12 |
| SLC4A1AP  | 0.0740079  | 1.0371E-12  |
| SUMF1     | 0.0638296  | 1.03714E-12 |
| SLC35D1   | 0.03447654 | 1.04162E-12 |
| ARHGAP45  | -0.0834669 | 1.042E-12   |
| EDRF1     | 0.05988546 | 1.04584E-12 |
| MOAP1     | -0.0603723 | 1.0478E-12  |
| FAM104A   | -0.0260157 | 1.05019E-12 |
| SLK       | -0.1072003 | 1.05303E-12 |
| XIST      | 0.34373772 | 1.05595E-12 |
| XPNPEP1   | -0.0762032 | 1.06221E-12 |
| XAB2      | -0.1023194 | 1.08056E-12 |
| C12orf76  | -0.0384994 | 1.08341E-12 |
| TDP1      | 0.06071433 | 1.08374E-12 |
| SPRY2     | 0.07525368 | 1.09701E-12 |
| PHAX      | -0.0341092 | 1.09985E-12 |
| MCTP1     | -0.0698494 | 1.10058E-12 |
| ZNF616    | 0.09127881 | 1.10597E-12 |
| TBXAS1    | 0.08908481 | 1.10659E-12 |
| HNRNPDL   | -0.2828899 | 1.1167E-12  |
| CERCAM    | 0.04091757 | 1.11948E-12 |
| FAM102A   | 0.07988045 | 1.12313E-12 |
| PEX5      | 0.04838341 | 1.12395E-12 |
| MUS81     | 0.04845865 | 1.12897E-12 |
| PPIL1     | 0.05963336 | 1.13249E-12 |
| KIAA0319L | 0.10706599 | 1.1344E-12  |
| CENPB     | 0.05242431 | 1.1347E-12  |
| C11orf71  | -0.0344595 | 1.13884E-12 |
| RCC1L     | -0.0021943 | 1.1413E-12  |
| TRAPPC10  | 0.02219625 | 1.14938E-12 |
| FLCN      | -0.0178616 | 1.15298E-12 |
| NEXN      | 0.15795132 | 1.15715E-12 |
| CCDC69    | -0.1415234 | 1.16325E-12 |
| FBRSL1    | 0.08608884 | 1.17212E-12 |
| RPRD1B    | -0.1841799 | 1.17397E-12 |
| KCTD10    | -0.1283353 | 1.17955E-12 |
| AHCYL2    | 0.06309266 | 1.18215E-12 |
| PCCB      | 0.00832419 | 1.18321E-12 |
| FAM241A   | -0.1272421 | 1.18678E-12 |
| BECN1     | 0.03358794 | 1.20208E-12 |
| TMEM9     | 0.05099365 | 1.20329E-12 |
| TK2       | 0.03627634 | 1.20504E-12 |
| ZNF12     | -0.0220262 | 1.21086E-12 |
| IPO9      | 0.08060698 | 1.23353E-12 |

|            |            |             |
|------------|------------|-------------|
| TNFSF12    | 0.08491252 | 1.23848E-12 |
| PHTF2      | -0.1134148 | 1.23912E-12 |
| AP3S2      | -0.0543396 | 1.24106E-12 |
| POM121C    | 0.00864306 | 1.25413E-12 |
| USP24      | 0.09381604 | 1.26689E-12 |
| THNSL1     | 0.06178618 | 1.28097E-12 |
| HOPX       | -0.3744752 | 1.28177E-12 |
| TEC        | 0.01412289 | 1.28324E-12 |
| HNRNPL     | 0.00497796 | 1.288E-12   |
| MBD1       | 0.03209937 | 1.29976E-12 |
| ABI1       | -0.1863545 | 1.30518E-12 |
| INTS14     | -0.0065098 | 1.30581E-12 |
| MAP2K7     | 0.01312346 | 1.31055E-12 |
| NSD3       | 0.15976839 | 1.32056E-12 |
| SNRPB      | -0.2603002 | 1.32087E-12 |
| ZNF385A    | -0.1982696 | 1.32363E-12 |
| HELZ       | -0.1447394 | 1.32819E-12 |
| SLC25A32   | -0.0118022 | 1.33446E-12 |
| EXOSC3     | -0.0735932 | 1.3428E-12  |
| MPV17L2    | 0.03215068 | 1.3491E-12  |
| GOLGA5     | -0.0043884 | 1.3493E-12  |
| THAP9-AS1  | -0.0976778 | 1.35452E-12 |
| YIF1B      | -0.061677  | 1.36718E-12 |
| FLAD1      | 0.05165238 | 1.38558E-12 |
| DAXX       | -0.0884645 | 1.39602E-12 |
| SETDB1     | -0.0127607 | 1.3983E-12  |
| UBA5       | 0.12166455 | 1.41642E-12 |
| STK11IP    | -0.0406511 | 1.41918E-12 |
| COG6       | 0.11820007 | 1.42004E-12 |
| RPS6KC1    | 0.0708733  | 1.42501E-12 |
| STK38L     | -0.0394154 | 1.42836E-12 |
| NIPBL-DT   | 0.1693515  | 1.43583E-12 |
| BSDC1      | -0.108515  | 1.43815E-12 |
| ZNF85      | 0.1191294  | 1.44895E-12 |
| AC103591.3 | -0.3175608 | 1.45752E-12 |
| BICD1      | 0.08103513 | 1.45846E-12 |
| NFE2L1     | -0.1448919 | 1.46631E-12 |
| CEP57L1    | 0.1534502  | 1.47203E-12 |
| SAP30L-AS1 | 0.05290661 | 1.4763E-12  |
| TMEM70     | -0.0401092 | 1.47829E-12 |
| TPSB2      | 0.07999213 | 1.48967E-12 |
| KLF3-AS1   | -0.1791326 | 1.49549E-12 |
| LIMK1      | -0.089845  | 1.50447E-12 |
| STRN3      | -0.0297609 | 1.51311E-12 |
| PSTPIP1    | -0.1903923 | 1.51927E-12 |
| ZMIZ2      | -0.0042516 | 1.52047E-12 |
| TMEM170A   | -0.0623636 | 1.52262E-12 |
| YAE1       | 0.05225805 | 1.54545E-12 |
| PLCB2      | -0.0132724 | 1.54986E-12 |
| TAX1BP3    | 0.09505311 | 1.55476E-12 |

|            |            |             |
|------------|------------|-------------|
| ZC3H18     | 0.03157755 | 1.5598E-12  |
| RPRD2      | 0.03706084 | 1.55985E-12 |
| CABIN1     | -0.1478789 | 1.56166E-12 |
| DBF4       | 0.12098751 | 1.56213E-12 |
| NPHP3      | 0.03502771 | 1.5663E-12  |
| NDUFA12    | -0.087776  | 1.57662E-12 |
| PCED1A     | 0.00188309 | 1.57665E-12 |
| QTRT1      | -0.1074056 | 1.57772E-12 |
| ATPAF2     | 0.00804583 | 1.57989E-12 |
| SCAF4      | -0.0662846 | 1.59455E-12 |
| KIAA0232   | -0.2382493 | 1.5957E-12  |
| PPP1R14B   | -0.2798378 | 1.61687E-12 |
| LITAF      | -0.1628837 | 1.62338E-12 |
| SNHG3      | 0.18020637 | 1.62989E-12 |
| RNF8       | 0.03191037 | 1.63123E-12 |
| SRP72      | 0.23453779 | 1.63321E-12 |
| TEFM       | 0.09045557 | 1.63375E-12 |
| SURF2      | 0.01242704 | 1.64504E-12 |
| RBBP5      | 0.04479284 | 1.65078E-12 |
| CLIP4      | 0.0857661  | 1.65119E-12 |
| DNAAF5     | 0.07021451 | 1.65487E-12 |
| GVQW3      | -0.0107002 | 1.65737E-12 |
| TARS2      | 0.09711589 | 1.67193E-12 |
| UQCRHL     | 0.07676085 | 1.67742E-12 |
| CNOT3      | -0.0158332 | 1.68282E-12 |
| POLR2A     | -0.0418375 | 1.68754E-12 |
| SNAPIN     | 0.02479358 | 1.68824E-12 |
| TMCO3      | -0.0482864 | 1.69845E-12 |
| B3GALNT1   | 0.08049527 | 1.6991E-12  |
| LGALS8     | 0.09258845 | 1.71616E-12 |
| BACH1      | 0.00577711 | 1.71957E-12 |
| HGSNAT     | 0.01380205 | 1.72966E-12 |
| AKNA       | -0.0493769 | 1.73501E-12 |
| PPM1G      | -0.0153527 | 1.73906E-12 |
| ALG5       | -0.0575239 | 1.74262E-12 |
| AC009403.1 | 0.0680445  | 1.7663E-12  |
| UBE2O      | 0.0386381  | 1.77218E-12 |
| DPEP2      | 0.02136788 | 1.77225E-12 |
| C18orf25   | -0.0805287 | 1.77307E-12 |
| YARS2      | -0.0355795 | 1.78643E-12 |
| AC144521.1 | 0.04512025 | 1.78709E-12 |
| TRMT6      | -0.0302131 | 1.79823E-12 |
| COQ4       | -0.0441441 | 1.80031E-12 |
| RAD23A     | -0.0151905 | 1.81042E-12 |
| PRPF38A    | -0.089854  | 1.81283E-12 |
| STMN3      | -0.0787872 | 1.83047E-12 |
| PRKCH      | -0.1564626 | 1.83206E-12 |
| SLC66A3    | 0.07465556 | 1.84122E-12 |
| ATG2A      | 0.03198574 | 1.84351E-12 |
| NUMA1      | 0.12400675 | 1.85697E-12 |

|            |            |             |
|------------|------------|-------------|
| IDH3A      | 0.06388626 | 1.86001E-12 |
| DCUN1D3    | -0.0622811 | 1.86446E-12 |
| QDPR       | 0.10376956 | 1.86844E-12 |
| UMODL1-AS  | 0.08161265 | 1.87084E-12 |
| CENPU      | -0.0491963 | 1.9209E-12  |
| DYRK1A     | -0.2211922 | 1.92325E-12 |
| ARL3       | -0.1132635 | 1.94042E-12 |
| EXOC1      | 0.02570313 | 1.95298E-12 |
| TMEM219    | -0.0080763 | 1.95353E-12 |
| APOBEC3G   | -0.0338405 | 1.96191E-12 |
| DUSP3      | 0.14595321 | 1.96807E-12 |
| CBX6       | 0.0399649  | 1.97651E-12 |
| PAPOLA     | -0.1654614 | 1.9819E-12  |
| VPS13D     | 0.05810818 | 1.98516E-12 |
| KCTD21-AS  | 0.08942749 | 1.9868E-12  |
| ZNF574     | -0.070595  | 1.98976E-12 |
| MAP3K2     | -0.0325652 | 2.0186E-12  |
| OSBP       | -0.1190802 | 2.03077E-12 |
| SGMS1-AS1  | 0.06839351 | 2.0491E-12  |
| ZNF692     | 0.07473469 | 2.05912E-12 |
| SUCLG1     | 0.03887049 | 2.06386E-12 |
| POLR3C     | 0.09075232 | 2.06482E-12 |
| OTUD6B     | 0.15621832 | 2.06515E-12 |
| EEPD1      | -0.1388512 | 2.06691E-12 |
| ERLEC1     | 0.06243631 | 2.07593E-12 |
| CDK17      | -0.1275816 | 2.08724E-12 |
| AC019080.1 | 0.0656224  | 2.08949E-12 |
| SNAPC5     | 0.0409376  | 2.10421E-12 |
| ATXN2      | -0.246071  | 2.10919E-12 |
| ABL2       | -0.0425682 | 2.11198E-12 |
| QRICH1     | -0.0280328 | 2.13099E-12 |
| OTULIN     | 0.10385319 | 2.13115E-12 |
| FBXW2      | -0.0151283 | 2.14127E-12 |
| EPB41      | 0.22232469 | 2.14602E-12 |
| AL133243.3 | -0.1274205 | 2.14675E-12 |
| HAUS6      | 0.05155397 | 2.15516E-12 |
| PDPR       | 0.03916476 | 2.15903E-12 |
| SFI1       | -0.0758544 | 2.17006E-12 |
| LTV1       | 0.04736182 | 2.17182E-12 |
| ANKRA2     | 0.06606251 | 2.23256E-12 |
| TMEM164    | 0.0524608  | 2.23776E-12 |
| KEAP1      | -0.0262539 | 2.24822E-12 |
| NPIP2      | 0.0837159  | 2.25088E-12 |
| PCCA-DT    | 0.0610706  | 2.26712E-12 |
| SLC25A26   | 0.04054286 | 2.3036E-12  |
| EZH1       | -0.0222361 | 2.32969E-12 |
| TUBGCP5    | 0.04061024 | 2.33171E-12 |
| LUC7L      | -0.0121762 | 2.33566E-12 |
| CERNA2     | 0.05968655 | 2.35297E-12 |
| SENP6      | 0.23300023 | 2.35611E-12 |



|            |            |             |
|------------|------------|-------------|
| DHX32      | 0.09880003 | 2.3564E-12  |
| ERO1B      | 0.077143   | 2.36322E-12 |
| UBFD1      | 0.03922077 | 2.38256E-12 |
| LINC01082  | 0.06118091 | 2.38713E-12 |
| ZNF460     | 0.05857132 | 2.393E-12   |
| PRIM2      | 0.04326336 | 2.41083E-12 |
| AC104596.1 | 0.05748705 | 2.41478E-12 |
| GIT2       | 0.07771329 | 2.42416E-12 |
| AC110285.2 | 0.02673292 | 2.44194E-12 |
| ATP1B1     | -0.2662107 | 2.45828E-12 |
| NUP88      | 0.02792499 | 2.4673E-12  |
| RAB18      | -0.0322723 | 2.49221E-12 |
| GPCPD1     | -0.0573277 | 2.49669E-12 |
| RIOX1      | -0.0064819 | 2.52349E-12 |
| ECI2       | 0.07025713 | 2.54692E-12 |
| RAB44      | 0.10586092 | 2.54966E-12 |
| NFKBIB     | -0.1548451 | 2.55367E-12 |
| NAB1       | -0.1499642 | 2.56545E-12 |
| ATG4D      | -0.1369974 | 2.60594E-12 |
| COBLL1     | -0.2685171 | 2.61506E-12 |
| PSMB3      | -0.146774  | 2.62442E-12 |
| UBXN7      | -0.1720853 | 2.62501E-12 |
| ST6GAL1    | 0.08527082 | 2.65273E-12 |
| CALU       | 0.08756742 | 2.65315E-12 |
| SMC5       | -0.0618979 | 2.65608E-12 |
| CIC        | -0.1092069 | 2.6667E-12  |
| RSU1       | 0.12514894 | 2.6705E-12  |
| SUCLA2     | 0.03584076 | 2.68544E-12 |
| OS9        | 0.08830727 | 2.70273E-12 |
| ZNF559     | 0.08987511 | 2.70469E-12 |
| PARP9      | 0.00706698 | 2.7062E-12  |
| RAB34      | -0.1457236 | 2.70787E-12 |
| SMS        | 0.10427766 | 2.71804E-12 |
| BORCS7     | -0.0162931 | 2.73083E-12 |
| MRPL49     | -0.1001249 | 2.74136E-12 |
| TTC9C      | -0.0100716 | 2.75121E-12 |
| SNHG21     | -0.0620695 | 2.77188E-12 |
| ZNF281     | 0.06887998 | 2.77732E-12 |
| PROSER1    | 0.01480098 | 2.78066E-12 |
| VPS29      | -0.0444334 | 2.79263E-12 |
| PIP4P2     | -0.0126234 | 2.7933E-12  |
| SRPK1      | 0.07443072 | 2.79652E-12 |
| UCKL1      | -0.0574726 | 2.80634E-12 |
| P4HB       | -0.1108083 | 2.82564E-12 |
| AC022973.5 | 0.08315965 | 2.8611E-12  |
| ATP11C     | 0.08608749 | 2.86542E-12 |
| SACS       | -0.016665  | 2.87724E-12 |
| YTHDF1     | -0.0218871 | 2.87873E-12 |
| ZBTB25     | 0.01872696 | 2.91562E-12 |
| ATP2C1     | 0.13702631 | 2.92226E-12 |

|            |            |             |
|------------|------------|-------------|
| CETN2      | -0.0799386 | 2.94804E-12 |
| RWDD4      | -0.0476382 | 2.97174E-12 |
| EMILIN2    | -0.0592923 | 2.99396E-12 |
| IER3IP1    | 0.01314777 | 3.00349E-12 |
| OPA1       | -0.1365262 | 3.01961E-12 |
| LENG9      | 0.09344461 | 3.03434E-12 |
| BCL2A1     | -0.1131524 | 3.05938E-12 |
| DDX39B     | -0.0646048 | 3.0619E-12  |
| ZDHHC9     | 0.04804387 | 3.07188E-12 |
| GTF2H2     | 0.11321366 | 3.07668E-12 |
| DUT        | 0.05841408 | 3.08533E-12 |
| ZER1       | -0.0361493 | 3.09209E-12 |
| ECHS1      | 0.13677983 | 3.09327E-12 |
| CAND1      | -0.0897506 | 3.11378E-12 |
| VPS16      | 0.01147284 | 3.13065E-12 |
| FN3KRP     | 0.06734355 | 3.1495E-12  |
| SLC26A1    | 0.07145579 | 3.155E-12   |
| POMP       | -0.2091611 | 3.17106E-12 |
| ATXN7      | 0.0080853  | 3.17263E-12 |
| FOXN3      | -0.0302392 | 3.17487E-12 |
| MIR222HG   | -0.0237594 | 3.17551E-12 |
| SH2D3C     | -0.1801148 | 3.19457E-12 |
| DCAF11     | 0.07518563 | 3.19543E-12 |
| EP400      | 0.14678017 | 3.21148E-12 |
| AC242426.2 | 0.05268039 | 3.22824E-12 |
| CRYZ       | 0.05002253 | 3.22859E-12 |
| MOSPD3     | 0.04389126 | 3.23419E-12 |
| PLGRKT     | 0.12863935 | 3.24477E-12 |
| RHBDD1     | 0.05155581 | 3.25636E-12 |
| LPGAT1     | 0.04698682 | 3.26061E-12 |
| TELO2      | 0.02408374 | 3.29386E-12 |
| KMT5A      | 0.00792308 | 3.32929E-12 |
| ZNF660     | 0.12282535 | 3.32939E-12 |
| ZNF184     | 0.07460606 | 3.35909E-12 |
| LHPP       | -0.0348309 | 3.37646E-12 |
| ZNF257     | 0.08088623 | 3.39202E-12 |
| RITA1      | 0.07850924 | 3.39563E-12 |
| FBXO28     | -0.0838872 | 3.39818E-12 |
| MPPE1      | 0.13881293 | 3.40611E-12 |
| VPS39      | 0.02438239 | 3.41447E-12 |
| CNOT8      | -0.0028163 | 3.44055E-12 |
| PIK3IP1    | 0.05695922 | 3.48348E-12 |
| TRNT1      | 0.00830407 | 3.48926E-12 |
| EFHC1      | -0.0076768 | 3.50937E-12 |
| CSTF1      | 0.01930753 | 3.51069E-12 |
| SGSM3      | -0.0540022 | 3.53953E-12 |
| BTBD1      | 0.04221767 | 3.5427E-12  |
| TASP1      | -0.0643154 | 3.57963E-12 |
| MOCS2      | 0.09129075 | 3.58195E-12 |
| YDJC       | 0.00827079 | 3.58951E-12 |

|            |            |             |
|------------|------------|-------------|
| TSIX       | 0.08950785 | 3.5946E-12  |
| SAMD11     | 0.06988164 | 3.61301E-12 |
| DOCK8      | 0.13881477 | 3.61739E-12 |
| MIPEP      | 0.07161615 | 3.6614E-12  |
| TAF11      | -0.0789493 | 3.66514E-12 |
| MED17      | -0.0329777 | 3.70334E-12 |
| ZNF33B     | 0.15711944 | 3.72863E-12 |
| PRPS1      | -0.0478423 | 3.74792E-12 |
| PSMC3      | -0.0327929 | 3.74897E-12 |
| ZNF213-AS1 | 0.09453689 | 3.75155E-12 |
| GLRX5      | 0.03452988 | 3.76117E-12 |
| GTF2F1     | -0.0682219 | 3.76459E-12 |
| COQ6       | 0.02412182 | 3.80125E-12 |
| MSL2       | 0.11961383 | 3.82913E-12 |
| AIDA       | -0.1326028 | 3.85724E-12 |
| IQCB1      | -0.0857125 | 3.87882E-12 |
| EIF6       | -0.0954496 | 3.88834E-12 |
| ACSS1      | -0.052532  | 3.9208E-12  |
| PEX26      | 0.14011034 | 3.92919E-12 |
| ETV3       | -0.0310126 | 3.9311E-12  |
| CCDC136    | 0.1169537  | 3.93267E-12 |
| DDX54      | 0.04772746 | 3.93716E-12 |
| TMEM123    | 0.24336853 | 3.9468E-12  |
| GHDC       | 0.10321215 | 3.95314E-12 |
| GRIPAP1    | -0.0842645 | 3.96649E-12 |
| PHF8       | 0.05375051 | 3.98497E-12 |
| NRIP1      | -0.0360262 | 4.00137E-12 |
| PIAS1      | -0.0967785 | 4.01366E-12 |
| PRPF39     | 0.0460687  | 4.02221E-12 |
| ENOX2      | 0.10545662 | 4.04797E-12 |
| CCDC97     | -0.121427  | 4.05908E-12 |
| TMEM161B   | 0.07894954 | 4.07623E-12 |
| CDC40      | -0.0985545 | 4.11113E-12 |
| UNKL       | 0.06385772 | 4.11287E-12 |
| LSM5       | 0.1619734  | 4.13094E-12 |
| VPS50      | 0.0732099  | 4.13825E-12 |
| CCDC88C    | -0.1412485 | 4.19318E-12 |
| MAML1      | 0.06389914 | 4.19907E-12 |
| MRTFA      | -0.1452873 | 4.20451E-12 |
| MYSM1      | 0.13401564 | 4.21328E-12 |
| PDGFC      | -0.0817973 | 4.25839E-12 |
| ZBED5      | 0.03760204 | 4.26138E-12 |
| ZNF701     | 0.04351478 | 4.26403E-12 |
| TMEM107    | 0.00853588 | 4.27012E-12 |
| WDFY4      | 0.09509889 | 4.27415E-12 |
| TUT4       | 0.17971513 | 4.27724E-12 |
| SNX10      | -0.1528859 | 4.28655E-12 |
| NME6       | 0.04408519 | 4.29193E-12 |
| LAMTOR2    | 0.1125787  | 4.29779E-12 |
| XIAP       | -0.042615  | 4.30918E-12 |

|            |            |             |
|------------|------------|-------------|
| VPS18      | -0.0482776 | 4.31637E-12 |
| CCDC25     | 0.09615632 | 4.31881E-12 |
| NUFIP1     | 0.06572602 | 4.33192E-12 |
| LYSMD3     | 0.03183192 | 4.35884E-12 |
| CCDC7      | 0.05498295 | 4.39411E-12 |
| STIMATE    | -0.0394362 | 4.40196E-12 |
| ZNF441     | 0.04096533 | 4.41767E-12 |
| C6orf120   | -0.0423388 | 4.42118E-12 |
| SLC2A1     | -0.2321485 | 4.42597E-12 |
| RNF6       | 0.0139763  | 4.45053E-12 |
| ZNF593     | 0.07637309 | 4.45234E-12 |
| AC007038.2 | 0.08848751 | 4.47395E-12 |
| DDX28      | -0.0118268 | 4.4913E-12  |
| DYSF       | -0.0568704 | 4.50582E-12 |
| CWC27      | 0.10699907 | 4.55637E-12 |
| MSANTD4    | 0.07282887 | 4.59285E-12 |
| YOD1       | 0.09392925 | 4.60966E-12 |
| METTL16    | 0.00285137 | 4.63193E-12 |
| COX7A2L    | 0.17744535 | 4.6779E-12  |
| MKNK1      | -0.0537058 | 4.69671E-12 |
| PSMC1      | -0.1008205 | 4.70814E-12 |
| DGKG       | 0.03782658 | 4.7237E-12  |
| HERPUD2    | -0.0651492 | 4.74904E-12 |
| ZNF326     | -0.205078  | 4.79569E-12 |
| DENND5A    | -0.0145152 | 4.83753E-12 |
| EID2       | 0.05800429 | 4.87543E-12 |
| MTM1       | 0.09938988 | 4.89186E-12 |
| PDPK1      | -0.0507465 | 4.93468E-12 |
| MSRB2      | 0.17646832 | 4.94124E-12 |
| AL391069.2 | 0.1382753  | 4.97503E-12 |
| DYNLRB1    | 0.20586102 | 5.03801E-12 |
| DCAF13     | 0.04851766 | 5.07017E-12 |
| USE1       | 0.0426216  | 5.11014E-12 |
| CCNT1      | -0.0366932 | 5.12753E-12 |
| LINC01637  | 0.09031133 | 5.14434E-12 |
| ASXL1      | 0.08522821 | 5.15057E-12 |
| ADCY7      | -0.0811228 | 5.15393E-12 |
| C19orf18   | 0.05818434 | 5.17288E-12 |
| RESF1      | 0.14163428 | 5.22199E-12 |
| FUT11      | 0.00620268 | 5.22984E-12 |
| MAN2A2     | 0.14641026 | 5.2805E-12  |
| ATAD2B     | -0.0440356 | 5.28894E-12 |
| NCOR2      | 0.06559986 | 5.30641E-12 |
| CAPZB      | -0.2033666 | 5.36138E-12 |
| CHEK2      | 0.09720118 | 5.36636E-12 |
| CYCS       | -0.0738962 | 5.43303E-12 |
| SEC23A     | -0.0566128 | 5.43342E-12 |
| SLC12A7    | -0.1899085 | 5.46228E-12 |
| BANF1      | 0.13282742 | 5.48402E-12 |
| ZNF564     | 0.03954806 | 5.4951E-12  |

|            |            |             |
|------------|------------|-------------|
| RCE1       | -0.0779853 | 5.5189E-12  |
| AC016876.1 | 0.04576822 | 5.58773E-12 |
| ZNF550     | 0.05431254 | 5.65204E-12 |
| ADIPOR2    | -0.1046135 | 5.67682E-12 |
| TRIM22     | 0.11626579 | 5.68964E-12 |
| KBTBD2     | -0.1378503 | 5.74732E-12 |
| RPL10      | -0.1897156 | 5.82036E-12 |
| EED        | -0.0344294 | 5.84905E-12 |
| SLC25A30   | 0.04342799 | 5.88986E-12 |
| BIK        | 0.06180862 | 5.89498E-12 |
| CRIP1      | 0.07604054 | 5.89884E-12 |
| SMARCA4    | 0.10631023 | 5.9084E-12  |
| MYO5A      | 0.06842173 | 5.91491E-12 |
| PIK3C2A    | 0.06080584 | 5.95453E-12 |
| C15orf40   | 0.12831039 | 5.98858E-12 |
| CEBPB      | -0.1146623 | 6.00176E-12 |
| NUP205     | 0.03790243 | 6.06603E-12 |
| AVL9       | -0.0427491 | 6.09184E-12 |
| ILF3       | 0.04005423 | 6.1628E-12  |
| THEM6      | 0.07146282 | 6.18276E-12 |
| EIF4E3     | 0.13954526 | 6.19813E-12 |
| SPATS2     | 0.10684129 | 6.20209E-12 |
| WASL       | -0.0213568 | 6.2257E-12  |
| PTRH2      | 0.08770182 | 6.25653E-12 |
| BLZF1      | -0.0934412 | 6.28633E-12 |
| ANKMY2     | -0.0455979 | 6.30862E-12 |
| USP32      | -0.0314609 | 6.34932E-12 |
| POLK       | -0.1306165 | 6.35104E-12 |
| SDF4       | -0.0562575 | 6.38447E-12 |
| ZFAND5     | 0.07819263 | 6.46995E-12 |
| RPAP3      | 0.07634255 | 6.5011E-12  |
| RAB2B      | -0.0031251 | 6.50594E-12 |
| VCP        | -0.1763884 | 6.53919E-12 |
| MRPL37     | -0.1041322 | 6.54145E-12 |
| RER1       | -0.0043508 | 6.54426E-12 |
| CARS2      | 0.04684545 | 6.56442E-12 |
| ZNF736     | 0.06315265 | 6.59533E-12 |
| MAD2L2     | -0.0408913 | 6.60666E-12 |
| CDT1       | -0.2642342 | 6.6569E-12  |
| NAPRT      | -0.1170793 | 6.69217E-12 |
| LINC01341  | 0.05278222 | 6.71376E-12 |
| IARS2      | 0.03971916 | 6.76617E-12 |
| TENT2      | -0.0051448 | 6.76937E-12 |
| RYBP       | -0.1203357 | 6.82998E-12 |
| DNAJC16    | 0.10110291 | 6.90904E-12 |
| ZNF577     | 0.08303286 | 6.97993E-12 |
| SLC27A5    | 0.06447421 | 6.98891E-12 |
| HSPG2      | -0.0712245 | 6.99167E-12 |
| ZNF623     | 0.04169481 | 7.02245E-12 |
| TMED7      | -0.0042958 | 7.02773E-12 |

|            |            |             |
|------------|------------|-------------|
| ASB3       | 0.05110737 | 7.0282E-12  |
| AL390728.5 | 0.06116953 | 7.04242E-12 |
| LINC00685  | 0.05840699 | 7.0848E-12  |
| DDX50      | 0.1292742  | 7.08909E-12 |
| MIR762HG   | 0.05779467 | 7.12568E-12 |
| CDKN2AIP   | 0.04496211 | 7.19053E-12 |
| AL035530.2 | 0.07656734 | 7.20172E-12 |
| CYFIP2     | -0.1913802 | 7.31955E-12 |
| ZNF888     | -0.0606912 | 7.33734E-12 |
| UBA7       | -0.0812413 | 7.37688E-12 |
| CXorf38    | -0.0562589 | 7.4062E-12  |
| SUOX       | 0.05274862 | 7.43404E-12 |
| LCORL      | 0.15069001 | 7.46065E-12 |
| PPDPF      | -0.2253554 | 7.46517E-12 |
| TIMM23B    | -0.06108   | 7.53169E-12 |
| KIZ        | 0.08169593 | 7.5444E-12  |
| TMEM87A    | -0.0083028 | 7.63803E-12 |
| LINC00847  | 0.00158243 | 7.65157E-12 |
| PLEKHA8    | 0.06215118 | 7.6712E-12  |
| PARP14     | 0.01559352 | 7.71084E-12 |
| MIA2       | 0.13766472 | 7.72513E-12 |
| PLPP6      | 0.05377338 | 7.82256E-12 |
| TRNAU1AP   | -0.0942872 | 7.90232E-12 |
| AC119396.1 | 0.03431147 | 7.91922E-12 |
| DPM3       | 0.12147087 | 7.93116E-12 |
| AC096711.2 | 0.04533056 | 7.93628E-12 |
| DENND4B    | -0.0166282 | 7.93838E-12 |
| GRWD1      | -0.0082677 | 7.94757E-12 |
| AC108863.2 | 0.04083705 | 8.09741E-12 |
| WWP2       | -0.0152713 | 8.14911E-12 |
| EEF2       | 0.20637158 | 8.152E-12   |
| C16orf72   | -0.1260468 | 8.15394E-12 |
| SPATA33    | -0.099279  | 8.1803E-12  |
| PPP4R3A    | 0.0776245  | 8.19618E-12 |
| ADNP       | 0.05523487 | 8.29991E-12 |
| GPT2       | -0.0570673 | 8.30686E-12 |
| CD82       | -0.2563206 | 8.3178E-12  |
| MITF       | 0.08774614 | 8.31831E-12 |
| ZNF234     | 0.05036417 | 8.33271E-12 |
| PITPNB     | -0.0114068 | 8.39203E-12 |
| SPPL2A     | -0.0870296 | 8.3926E-12  |
| SLC9A3-AS1 | 0.04495941 | 8.45817E-12 |
| AC044849.1 | -0.1877788 | 8.48457E-12 |
| A1BG       | -0.2212501 | 8.51831E-12 |
| ZNF263     | 0.00224719 | 8.64075E-12 |
| NDUFS4     | 0.15302446 | 8.66419E-12 |
| GRHPR      | -0.1499192 | 8.71337E-12 |
| ULK1       | -0.0263372 | 8.79431E-12 |
| DHRS1      | -0.0394395 | 8.79597E-12 |
| MANBAL     | -0.0903773 | 8.81365E-12 |

|            |            |             |
|------------|------------|-------------|
| UBA6-AS1   | 0.06844199 | 8.82015E-12 |
| MESP1      | 0.07771744 | 8.84557E-12 |
| GMIP       | -0.0618283 | 8.86629E-12 |
| BABAM2     | 0.01646412 | 8.98897E-12 |
| PCLAF      | -0.4395713 | 8.99436E-12 |
| MCCC1      | 0.03337058 | 9.04654E-12 |
| ZBTB41     | 0.08410362 | 9.12955E-12 |
| ANKRD46    | 0.09240477 | 9.16348E-12 |
| FAM135A    | 0.09379348 | 9.28598E-12 |
| UBXN4      | -0.2109829 | 9.3083E-12  |
| HAGH       | 0.07654858 | 9.36442E-12 |
| ARID1A     | 0.01912467 | 9.37081E-12 |
| INTS6-AS1  | 0.07313508 | 9.4138E-12  |
| ANKRD13A   | 0.03578091 | 9.4826E-12  |
| SF3B6      | -0.2291002 | 9.49413E-12 |
| ATP1A1     | -0.0982421 | 9.55244E-12 |
| SQLE       | -0.1882582 | 9.57196E-12 |
| AC211476.6 | 0.05197836 | 9.57465E-12 |
| KDM1B      | 0.05789258 | 9.716E-12   |
| AURKAIP1   | 0.1005424  | 9.74787E-12 |
| BTBD8      | 0.05419951 | 9.82677E-12 |
| FH         | 0.06779022 | 9.84188E-12 |
| TPRA1      | 0.03900507 | 9.8918E-12  |
| MT-CO3     | -0.2081649 | 1.00453E-11 |
| CMC2       | 0.01328916 | 1.00665E-11 |
| PRMT1      | 0.00625878 | 1.00885E-11 |
| NAAA       | -0.1318499 | 1.01761E-11 |
| TFRC       | -0.2237818 | 1.02E-11    |
| POLR3D     | 0.09545356 | 1.02462E-11 |
| CAVIN1     | -0.1608341 | 1.03719E-11 |
| AC104825.1 | 0.03630602 | 1.04075E-11 |
| C9orf78    | 0.1314214  | 1.04505E-11 |
| MRPS25     | 0.11653042 | 1.05033E-11 |
| LHFPL2     | -0.0803727 | 1.05584E-11 |
| NAT10      | 0.13351353 | 1.05915E-11 |
| WDR34      | -0.0699697 | 1.06701E-11 |
| BX284668.5 | 0.07723867 | 1.07123E-11 |
| FOXN2      | -0.1221735 | 1.07275E-11 |
| AC016831.7 | -0.1417277 | 1.07317E-11 |
| PPP1R26    | 0.05318474 | 1.07337E-11 |
| ZNF268     | 0.03512809 | 1.07675E-11 |
| NOTCH2NL/  | 0.04183997 | 1.0787E-11  |
| AC008969.1 | 0.11945683 | 1.08778E-11 |
| SAMD8      | -0.1334185 | 1.0886E-11  |
| POLE4      | 0.04650778 | 1.09204E-11 |
| MRPS6      | -0.093777  | 1.09313E-11 |
| RASSF7     | -0.0318765 | 1.09428E-11 |
| TMEM38B    | -0.0760831 | 1.10571E-11 |
| BRAT1      | 0.01809372 | 1.1076E-11  |
| CASP8AP2   | 0.09010896 | 1.11314E-11 |

|           |            |             |
|-----------|------------|-------------|
| DYNC2LI1  | 0.06570512 | 1.12242E-11 |
| CENPH     | 0.0074018  | 1.13234E-11 |
| OSBPL8    | 0.24928597 | 1.13402E-11 |
| DHX38     | 0.02320519 | 1.13802E-11 |
| BISPR     | 0.07196123 | 1.15751E-11 |
| CASP3     | -0.158339  | 1.16113E-11 |
| LMBRD1    | 0.0460522  | 1.16233E-11 |
| MARCH7    | -0.0008465 | 1.16277E-11 |
| LRP5      | 0.07559371 | 1.16887E-11 |
| GNB5      | 0.10060734 | 1.17729E-11 |
| REL       | -0.0817994 | 1.19433E-11 |
| CMTR1     | 0.03733705 | 1.19541E-11 |
| KDM4B     | 0.0247742  | 1.19594E-11 |
| KATNB1    | -0.1055776 | 1.19899E-11 |
| COQ2      | 0.06372878 | 1.19914E-11 |
| ZNF783    | 0.05796769 | 1.21036E-11 |
| WDR45B    | 0.14103655 | 1.21384E-11 |
| PIP5K1A   | -0.0316108 | 1.21424E-11 |
| NCBP3     | 0.17535025 | 1.2228E-11  |
| Z99127.4  | 0.03100599 | 1.22699E-11 |
| ECHDC2    | -0.0054396 | 1.22923E-11 |
| ANAPC15   | -0.0890244 | 1.23138E-11 |
| ZC3H11A   | 0.05630759 | 1.23218E-11 |
| ZNF417    | 0.07188763 | 1.23981E-11 |
| DDX20     | -0.0438073 | 1.24199E-11 |
| PEX16     | -0.0859392 | 1.24322E-11 |
| TRIM21    | -0.0193873 | 1.24869E-11 |
| NSUN4     | 0.01841323 | 1.25082E-11 |
| NUP37     | 0.06773573 | 1.26259E-11 |
| POFUT1    | 0.0857913  | 1.27646E-11 |
| ARSA      | -0.0799617 | 1.28854E-11 |
| C16orf91  | -0.0075767 | 1.29003E-11 |
| OBSCN     | 0.04764035 | 1.29095E-11 |
| TIMM8A    | 0.02530373 | 1.29584E-11 |
| APOBEC3C  | 0.09934821 | 1.29874E-11 |
| MEGF8     | 0.07328754 | 1.29941E-11 |
| CCDC85B   | 0.16531519 | 1.31256E-11 |
| RAMAC     | 0.02675268 | 1.31555E-11 |
| ENTPD3-AS | 0.0582913  | 1.32282E-11 |
| GOLGA8Q   | 0.07377703 | 1.32542E-11 |
| RNF115    | -0.0009749 | 1.32675E-11 |
| AHCTF1    | -0.016774  | 1.33368E-11 |
| CRYZL1    | -0.0518113 | 1.33592E-11 |
| PROK2     | 0.07446069 | 1.34808E-11 |
| C1QBP     | 0.27674558 | 1.35117E-11 |
| TEX261    | 0.0202933  | 1.37478E-11 |
| PRKCSH    | 0.03298036 | 1.37575E-11 |
| PLCXD1    | -0.0145129 | 1.3759E-11  |
| LINC01215 | -0.1505312 | 1.39019E-11 |
| SLC19A1   | 0.04898475 | 1.39621E-11 |



|          |            |             |
|----------|------------|-------------|
| ANKRD26  | 0.12903149 | 1.39779E-11 |
| RAP1GDS1 | 0.01252587 | 1.39888E-11 |
| BCS1L    | 0.01956689 | 1.40111E-11 |
| KBTBD3   | 0.05683923 | 1.40966E-11 |
| TCIRG1   | -0.1221001 | 1.4103E-11  |
| PPP2R5E  | 0.05097674 | 1.41506E-11 |
| UBR7     | 0.00969051 | 1.41575E-11 |
| BTBD3    | -0.0472533 | 1.41864E-11 |
| KIF9-AS1 | 0.00819533 | 1.41901E-11 |
| PDK3     | 0.03568817 | 1.46759E-11 |
| STXBP2   | -0.0435893 | 1.47218E-11 |
| ERCC2    | 0.0631004  | 1.47551E-11 |
| MTRR     | 0.04039683 | 1.48591E-11 |
| RRM2B    | 0.0413072  | 1.4862E-11  |
| TICAM1   | -0.1716846 | 1.48774E-11 |
| SMN1     | 0.06258113 | 1.49003E-11 |
| SCRN1    | -0.2032488 | 1.49171E-11 |
| ZNF765   | 0.07927751 | 1.49448E-11 |
| RBM48    | 0.01378275 | 1.49574E-11 |
| MRPL4    | 0.07673541 | 1.50568E-11 |
| SAMSN1   | 0.17772758 | 1.50773E-11 |
| TRIM37   | 0.04633964 | 1.52656E-11 |
| EIF4EBP3 | 0.1154105  | 1.52669E-11 |
| CANT1    | -0.0432486 | 1.54369E-11 |
| GPATCH8  | -0.0313898 | 1.54451E-11 |
| ZMYM6    | 0.0829051  | 1.55089E-11 |
| APPL2    | 0.03616575 | 1.5515E-11  |
| DYRK4    | 0.03362514 | 1.55397E-11 |
| SLC41A3  | -0.0126448 | 1.55555E-11 |
| NBR1     | 0.1291348  | 1.55715E-11 |
| ZNF93    | 0.11125897 | 1.56886E-11 |
| EHD4     | -0.1356477 | 1.57257E-11 |
| SYNE1    | 0.08160628 | 1.58621E-11 |
| TRIM58   | 0.00599771 | 1.58871E-11 |
| PSMD13   | -0.1057701 | 1.59604E-11 |
| MOCS3    | 0.01768667 | 1.59732E-11 |
| TRAF3    | -0.1491836 | 1.60392E-11 |
| L3MBTL1  | 0.0673098  | 1.60773E-11 |
| FAR2     | 0.01599504 | 1.61504E-11 |
| MOGS     | 0.03990843 | 1.63296E-11 |
| WAC      | -0.1575979 | 1.63418E-11 |
| SNN      | -0.1492956 | 1.64973E-11 |
| FAM53B   | 0.07767878 | 1.66738E-11 |
| NAPA     | -0.1027425 | 1.67421E-11 |
| SLC35A4  | -0.0122739 | 1.67775E-11 |
| MTMR4    | 0.05810467 | 1.68665E-11 |
| SYT11    | -0.1978197 | 1.68723E-11 |
| REPS1    | 0.0496679  | 1.71056E-11 |
| MAMDC2   | -0.1315375 | 1.71396E-11 |
| SPHK1    | -0.1458265 | 1.7277E-11  |

|            |            |             |
|------------|------------|-------------|
| REEP3      | 0.08105054 | 1.74658E-11 |
| LINC00476  | 0.10489091 | 1.75049E-11 |
| MTA1       | -0.0256126 | 1.75539E-11 |
| RAB7A      | -0.1033296 | 1.75668E-11 |
| RERE       | -0.0216243 | 1.75906E-11 |
| ACPP       | 0.00610392 | 1.77657E-11 |
| ZNF548     | 0.0361149  | 1.80172E-11 |
| GPD2       | 0.0522661  | 1.80798E-11 |
| ZFP90      | 0.06731918 | 1.83252E-11 |
| AL031595.3 | -0.1357874 | 1.88189E-11 |
| GTF2F2     | 0.00659955 | 1.88235E-11 |
| GCAT       | 0.0781692  | 1.88308E-11 |
| WAPL       | -0.0264367 | 1.89334E-11 |
| TBC1D2     | 0.03397397 | 1.89699E-11 |
| CR381653.1 | 0.04527767 | 1.89893E-11 |
| COPS9      | 0.23057624 | 1.934E-11   |
| MROH1      | 0.05513363 | 1.95036E-11 |
| PLEKHM2    | -0.0107691 | 1.9511E-11  |
| NGRN       | -0.1363052 | 1.95152E-11 |
| MADD       | 0.0478206  | 1.9557E-11  |
| MEX3C      | -0.0976862 | 1.96497E-11 |
| NCOA7      | -0.0006572 | 1.96868E-11 |
| DUSP22     | -0.0076553 | 1.9687E-11  |
| SENP2      | -0.0390864 | 1.96885E-11 |
| VOPP1      | 0.01345322 | 1.96979E-11 |
| FIGNL1     | 0.0595734  | 1.98559E-11 |
| TBCE       | 0.01781331 | 1.98571E-11 |
| RASGRP2    | -0.1095976 | 1.99494E-11 |
| NAA30      | -0.0042316 | 2.00945E-11 |
| CFDP1      | 0.22255325 | 2.0101E-11  |
| UBE2K      | 0.01467283 | 2.02038E-11 |
| FAM3C      | -0.0688058 | 2.03903E-11 |
| AC008124.1 | -0.0076303 | 2.04275E-11 |
| ATG5       | -0.0603553 | 2.08564E-11 |
| DEDD       | -0.1551847 | 2.09729E-11 |
| CYBC1      | 0.04164241 | 2.10026E-11 |
| FAM41C     | 0.03319573 | 2.12091E-11 |
| LRMP       | 0.00905503 | 2.12346E-11 |
| SPECC1L    | 0.0500783  | 2.13159E-11 |
| CHCHD4     | 0.05903389 | 2.13978E-11 |
| CCND2      | 0.00396443 | 2.15762E-11 |
| PUM1       | -0.1552451 | 2.17268E-11 |
| SAP130     | 0.05834166 | 2.18059E-11 |
| IRAK1BP1   | 0.06480417 | 2.1824E-11  |
| LRP10      | -0.1964051 | 2.19029E-11 |
| GPKOW      | -0.0316516 | 2.20675E-11 |
| GEMIN5     | 0.07594673 | 2.22258E-11 |
| P4HTM      | -0.0773061 | 2.2274E-11  |
| PICALM     | -0.0372883 | 2.24483E-11 |
| SCRN2      | -0.0258764 | 2.2503E-11  |

|            |            |             |
|------------|------------|-------------|
| EEF1AKMT2  | 0.0682202  | 2.25078E-11 |
| BAZ1B      | 0.04033026 | 2.25881E-11 |
| TMEM126A   | 0.02836254 | 2.26845E-11 |
| RALA       | -0.1286017 | 2.26942E-11 |
| SLC25A15   | 0.04467431 | 2.27034E-11 |
| VTI1B      | 0.04073639 | 2.27486E-11 |
| FASTKD3    | 0.04787517 | 2.2844E-11  |
| SHMT1      | 0.07300478 | 2.2865E-11  |
| PRTN3      | 0.31154861 | 2.29243E-11 |
| NCOA6      | 0.08968284 | 2.30635E-11 |
| SEL1L      | -0.0411092 | 2.31288E-11 |
| FAM122A    | 0.02114556 | 2.33096E-11 |
| CHD6       | 0.04885351 | 2.36342E-11 |
| NDUFS6     | 0.17650052 | 2.36414E-11 |
| DEGS2      | 0.057246   | 2.3715E-11  |
| RNF24      | 0.18276143 | 2.39116E-11 |
| CRACR2A    | 0.04580464 | 2.4238E-11  |
| TBK1       | 0.00118572 | 2.44435E-11 |
| CHRAC1     | 0.03739748 | 2.44691E-11 |
| SMAD7      | 0.01481793 | 2.44947E-11 |
| BATF       | 0.02478772 | 2.47374E-11 |
| TSPAN33    | -0.0277122 | 2.47884E-11 |
| UNC5B      | -0.0412579 | 2.48096E-11 |
| PSPH       | 0.07215564 | 2.48565E-11 |
| OGFOD3     | 0.05344636 | 2.48901E-11 |
| PSMG2      | -0.086481  | 2.50037E-11 |
| ZNF544     | 0.10235779 | 2.52162E-11 |
| VMAC       | -0.0255564 | 2.52798E-11 |
| CLPX       | 0.07067393 | 2.52945E-11 |
| TMED5      | -0.0633134 | 2.55119E-11 |
| IMMT       | 0.06327568 | 2.55191E-11 |
| IFIT3      | 0.05961756 | 2.56123E-11 |
| IMMP2L     | 0.06993099 | 2.5619E-11  |
| CAPN10     | -0.0450229 | 2.57733E-11 |
| PTK7       | 0.04267359 | 2.58348E-11 |
| H2AFZ      | -0.1605948 | 2.58365E-11 |
| STX3       | -0.1270109 | 2.59929E-11 |
| ATP13A3    | 0.00255697 | 2.60022E-11 |
| TNFSF13    | -0.1179819 | 2.61225E-11 |
| IFT74      | 0.13658634 | 2.62167E-11 |
| KARS       | 0.0768396  | 2.63161E-11 |
| UMAD1      | 0.05246434 | 2.63202E-11 |
| BRF2       | -0.0096943 | 2.66546E-11 |
| ZFP62      | 0.06214621 | 2.67508E-11 |
| BROX       | 0.14177507 | 2.68713E-11 |
| NAA15      | -0.0731883 | 2.68946E-11 |
| USP1       | -0.0381171 | 2.70212E-11 |
| FO393401.1 | 0.02388591 | 2.74688E-11 |
| MYH11      | 0.063115   | 2.77435E-11 |
| TNRC6A     | -0.0293612 | 2.78678E-11 |

|            |            |             |
|------------|------------|-------------|
| LINC01578  | -0.2367868 | 2.80932E-11 |
| RTN2       | 0.06718085 | 2.81122E-11 |
| RNH1       | 0.08268716 | 2.83762E-11 |
| MRPS18B    | 0.02571498 | 2.83804E-11 |
| AKAP11     | 0.09092796 | 2.85969E-11 |
| TRAPPC2B   | -0.0379881 | 2.87074E-11 |
| ABITRAM    | 0.04676279 | 2.87274E-11 |
| SNAPC4     | 0.0663436  | 2.88236E-11 |
| CDC73      | -0.0868499 | 2.89009E-11 |
| GATAD2A    | -0.0803358 | 2.89572E-11 |
| DIS3       | -0.0467781 | 2.95884E-11 |
| CCDC137    | -0.0836169 | 2.98275E-11 |
| MTPAP      | 0.03842669 | 2.99511E-11 |
| SHLD2      | 0.0081896  | 2.99928E-11 |
| LENG8-AS1  | 0.0950686  | 3.00163E-11 |
| RBM12      | -0.0519081 | 3.0114E-11  |
| ELK1       | -0.0304383 | 3.01299E-11 |
| TADA2A     | 0.06550961 | 3.04151E-11 |
| D2HGDH     | -0.0450239 | 3.06107E-11 |
| ERC1       | 0.04994348 | 3.07597E-11 |
| APOL6      | -0.1200125 | 3.09063E-11 |
| OPA3       | 0.01401934 | 3.11851E-11 |
| WDR33      | 0.0190096  | 3.13365E-11 |
| TOMM5      | 0.21774659 | 3.15774E-11 |
| ADCY3      | 0.04445786 | 3.16266E-11 |
| TIGD5      | 0.00805085 | 3.1714E-11  |
| ZNF581     | -0.0479214 | 3.18582E-11 |
| NIPSNAP2   | 0.10283934 | 3.19238E-11 |
| MFSD5      | -0.0399274 | 3.20038E-11 |
| HEIH       | -0.0439486 | 3.21105E-11 |
| VPS26B     | 0.03317834 | 3.24443E-11 |
| AC012146.1 | 0.13864162 | 3.2497E-11  |
| HYMAI      | -0.0451208 | 3.25059E-11 |
| SAE1       | 0.03430896 | 3.25096E-11 |
| ZYG11B     | 0.10574991 | 3.26266E-11 |
| MLXIP      | 0.07553528 | 3.26303E-11 |
| FAM200B    | 0.05630951 | 3.29698E-11 |
| HEXB       | 0.07826523 | 3.30537E-11 |
| SECISBP2L  | -0.1054581 | 3.33376E-11 |
| MRPL45     | 0.12872141 | 3.35149E-11 |
| SCMH1      | 0.04397556 | 3.40844E-11 |
| EVI2A      | 0.16852575 | 3.42363E-11 |
| PSMD2      | 0.10115925 | 3.42913E-11 |
| TFEB       | -0.1418244 | 3.46051E-11 |
| ACSF3      | 0.14606309 | 3.49837E-11 |
| SHMT2      | 0.03121331 | 3.51196E-11 |
| POU5F2     | 0.06578612 | 3.52699E-11 |
| GRSF1      | 0.07459713 | 3.52986E-11 |
| AC092279.1 | 0.03300183 | 3.53024E-11 |
| ZNF174     | 0.04431705 | 3.53712E-11 |

|          |            |             |
|----------|------------|-------------|
| PARVG    | 0.13309754 | 3.55395E-11 |
| RCCD1    | 0.08638201 | 3.55422E-11 |
| TP53RK   | 0.03008597 | 3.55792E-11 |
| ELOVL5   | 0.01025008 | 3.60326E-11 |
| TLE3     | -0.0467412 | 3.61635E-11 |
| ABCA2    | 0.01166896 | 3.6199E-11  |
| SUN1     | -0.1697952 | 3.63604E-11 |
| RUVBL2   | 0.02224472 | 3.64148E-11 |
| MCM9     | 0.06578627 | 3.65149E-11 |
| FAM184B  | 0.05249141 | 3.67156E-11 |
| SERINC3  | 0.08836348 | 3.68969E-11 |
| SLC7A6   | -0.1094501 | 3.74621E-11 |
| FEM1B    | -0.0427796 | 3.74696E-11 |
| RAB12    | 0.02599654 | 3.75627E-11 |
| MKLN1    | -0.1042212 | 3.77958E-11 |
| TRAF7    | 0.03157964 | 3.81585E-11 |
| ARHGAP17 | -0.0020468 | 3.81781E-11 |
| DPP3     | 0.01668591 | 3.83119E-11 |
| PDS5A    | 0.11149142 | 3.90611E-11 |
| TPGS1    | -0.0058646 | 3.96437E-11 |
| MRPL35   | 0.08930895 | 3.96683E-11 |
| SLC38A1  | -0.2928006 | 3.97066E-11 |
| PTPN9    | -0.0618926 | 4.01846E-11 |
| WRAP73   | 0.03234583 | 4.02358E-11 |
| NIBAN1   | 0.2748004  | 4.03068E-11 |
| USP25    | 0.0741336  | 4.03534E-11 |
| ASCC2    | 0.08452082 | 4.03927E-11 |
| VPS54    | 0.086076   | 4.0487E-11  |
| TNKS2    | -0.0585298 | 4.05781E-11 |
| IKBKE    | -0.0746879 | 4.06313E-11 |
| CIAO1    | 0.08287497 | 4.06773E-11 |
| ACTR2    | 0.19081139 | 4.07324E-11 |
| PLCL2    | 0.04397289 | 4.08589E-11 |
| CASTOR2  | 0.07397532 | 4.09492E-11 |
| SNAP47   | -0.0440473 | 4.11671E-11 |
| C1orf216 | -0.0053072 | 4.1272E-11  |
| NECTIN2  | -0.1518922 | 4.14576E-11 |
| HERC3    | -0.0457596 | 4.14742E-11 |
| DDX31    | 0.06320376 | 4.15489E-11 |
| TMEM64   | 0.04413452 | 4.18082E-11 |
| ILKAP    | 0.01849052 | 4.20311E-11 |
| FLII     | -0.0197646 | 4.22182E-11 |
| ZP3      | 0.06019024 | 4.23451E-11 |
| ACACA    | -0.0142086 | 4.25716E-11 |
| TRIB3    | -0.1542503 | 4.28528E-11 |
| NUB1     | 0.08833364 | 4.29014E-11 |
| TMX2     | 0.06063713 | 4.29783E-11 |
| STK3     | 0.08580536 | 4.36995E-11 |
| CRBN     | -0.1783721 | 4.3899E-11  |
| UPF1     | -0.0717736 | 4.39403E-11 |

|            |            |             |
|------------|------------|-------------|
| KBTBD6     | 0.02535017 | 4.40179E-11 |
| ZNF230     | 0.05182598 | 4.42992E-11 |
| FBXO46     | 0.03424529 | 4.43071E-11 |
| XRN1       | 0.04955207 | 4.49209E-11 |
| MBNL2      | 0.03331696 | 4.50121E-11 |
| ABHD16A    | -0.083585  | 4.50795E-11 |
| FASTKD2    | 0.01300627 | 4.51473E-11 |
| AC004687.1 | 0.25967247 | 4.58319E-11 |
| ZNF816     | -0.0030016 | 4.62821E-11 |
| MPP5       | 0.0220919  | 4.63412E-11 |
| SCML2      | -0.1256002 | 4.70332E-11 |
| MED31      | -0.1001018 | 4.72491E-11 |
| VWA8       | 0.06708286 | 4.72771E-11 |
| HMBS       | 0.05441453 | 4.74164E-11 |
| TBC1D7     | 0.00982779 | 4.74645E-11 |
| SOX18      | -0.1918914 | 4.79051E-11 |
| CDK5RAP2   | -0.0611125 | 4.86329E-11 |
| PSMB4      | -0.0740174 | 4.90833E-11 |
| GABPB2     | 0.10493522 | 4.94642E-11 |
| ZCCHC9     | 0.06906206 | 4.97926E-11 |
| MEMO1      | 0.06911373 | 4.97944E-11 |
| EPS15L1    | 0.09060875 | 5.01234E-11 |
| AL121933.2 | 0.03733911 | 5.04604E-11 |
| ZNF665     | 0.09776308 | 5.05385E-11 |
| PDSS2      | 0.07412286 | 5.09039E-11 |
| GOLGA8B    | 0.06889456 | 5.09137E-11 |
| SRP54      | -0.0204624 | 5.09402E-11 |
| SLC38A2    | 0.0482157  | 5.15452E-11 |
| CLN6       | 0.06261007 | 5.192E-11   |
| ZNF267     | -0.0721027 | 5.19798E-11 |
| DCAF7      | 0.13097279 | 5.19997E-11 |
| GEMIN2     | 0.02865143 | 5.24748E-11 |
| TOPORS     | 0.06316039 | 5.27458E-11 |
| SMAD4      | -0.0695752 | 5.28582E-11 |
| CDC26      | 0.03738545 | 5.29905E-11 |
| AC007038.1 | 0.07156482 | 5.35097E-11 |
| JADE2      | -0.0641344 | 5.36557E-11 |
| TSPOAP1    | 0.07425965 | 5.40818E-11 |
| VPS35L     | 0.06888386 | 5.41863E-11 |
| AMPD2      | -0.0966847 | 5.42566E-11 |
| FAM160B2   | -0.0996724 | 5.46793E-11 |
| CXorf40B   | -0.0368251 | 5.47744E-11 |
| SLC12A6    | 0.10505125 | 5.49915E-11 |
| SPIRE1     | 0.06143789 | 5.50993E-11 |
| NFU1       | 0.07204262 | 5.51163E-11 |
| ITPR1      | 0.15452702 | 5.53152E-11 |
| SRCAP      | 0.026102   | 5.58849E-11 |
| PSMD1      | 0.05669327 | 5.59326E-11 |
| IDH3G      | 0.00672158 | 5.60628E-11 |
| MPZL1      | 0.10392121 | 5.64249E-11 |

|            |            |             |
|------------|------------|-------------|
| UNC45A     | -0.030172  | 5.67202E-11 |
| ACTR3B     | 0.05881248 | 5.68459E-11 |
| SRI        | -0.0989073 | 5.68664E-11 |
| PMPCB      | 0.15119011 | 5.69011E-11 |
| INTS2      | 0.08714381 | 5.70987E-11 |
| ZNF383     | 0.08166887 | 5.74903E-11 |
| RUNDC1     | -3.37E-05  | 5.95596E-11 |
| RIMKLB     | -0.1287357 | 5.99145E-11 |
| HOXA4      | 0.04715637 | 6.06694E-11 |
| WDR37      | -0.0285042 | 6.0833E-11  |
| ZFAND2A    | -0.1677919 | 6.09161E-11 |
| ZBTB24     | 0.02154058 | 6.14252E-11 |
| CENPQ      | 0.06013309 | 6.14903E-11 |
| IL4R       | -0.1685692 | 6.17091E-11 |
| FNIP1      | 0.13270563 | 6.17298E-11 |
| CLMN       | -0.0899617 | 6.18746E-11 |
| AC025171.4 | 0.06646563 | 6.19211E-11 |
| DHX9       | 0.17790122 | 6.20137E-11 |
| RGS3       | -0.1563857 | 6.20872E-11 |
| SLC1A5     | -0.1687942 | 6.23326E-11 |
| AC024075.1 | 0.04278444 | 6.24189E-11 |
| MARCH6     | 0.04594709 | 6.30582E-11 |
| DENND1A    | 0.02728854 | 6.32474E-11 |
| HSPBP1     | -0.0363555 | 6.37232E-11 |
| ING3       | 0.0394607  | 6.37334E-11 |
| ACY1       | 0.00888795 | 6.3858E-11  |
| LSM14A     | 0.02772637 | 6.38638E-11 |
| VAMP7      | -0.0100482 | 6.38761E-11 |
| ZSCAN32    | -0.0023948 | 6.41453E-11 |
| LTBR       | -0.1383232 | 6.43525E-11 |
| TMEM8A     | -0.0037559 | 6.45787E-11 |
| TADA3      | 0.06365857 | 6.46117E-11 |
| LARP7      | 0.17324302 | 6.47348E-11 |
| NRBF2      | 0.01967833 | 6.49504E-11 |
| KIAA1191   | 0.02895705 | 6.53767E-11 |
| LAS1L      | 0.06735292 | 6.59547E-11 |
| ZFP3       | 0.06505498 | 6.63331E-11 |
| BRCA1      | 0.00068738 | 6.65254E-11 |
| AL133330.1 | -0.1679473 | 6.81598E-11 |
| CREM       | -0.2476051 | 6.88696E-11 |
| NBEAL2     | -0.2083072 | 6.89853E-11 |
| BLM        | 0.09310107 | 6.94082E-11 |
| PTPN4      | 0.03298222 | 6.94305E-11 |
| FNTB       | 0.08725405 | 6.9579E-11  |
| SLC23A2    | 0.02197905 | 7.00233E-11 |
| ATF7IP     | 0.13717074 | 7.13583E-11 |
| ECSIT      | 0.02188313 | 7.15528E-11 |
| TSPAN31    | -0.0038899 | 7.17958E-11 |
| HM13       | -0.0769584 | 7.18034E-11 |
| VPS37A     | -0.0080559 | 7.21509E-11 |

|            |            |             |
|------------|------------|-------------|
| KIF2A      | -0.1659946 | 7.22062E-11 |
| CSE1L      | 0.05063527 | 7.23854E-11 |
| ZNF404     | 0.06128133 | 7.26844E-11 |
| ARHGAP9    | -0.1157882 | 7.41941E-11 |
| SMIM4      | 0.11223019 | 7.42818E-11 |
| CRISPLD1   | 0.06364801 | 7.43508E-11 |
| NDUFS7     | 0.13762262 | 7.44639E-11 |
| LINC01150  | 0.03936983 | 7.44849E-11 |
| AC092171.5 | 0.05291664 | 7.52439E-11 |
| PHF12      | -0.0436252 | 7.54163E-11 |
| RDX        | -0.100579  | 7.64435E-11 |
| NCBP1      | 0.08845615 | 7.67279E-11 |
| RPS6KB2    | -0.0614372 | 7.72518E-11 |
| RORA-AS1   | 0.07942625 | 7.72677E-11 |
| ACP5       | 0.04997034 | 7.78446E-11 |
| CYB5RL     | 0.05966646 | 7.78573E-11 |
| ZNF586     | 0.04073332 | 7.82014E-11 |
| TMEM129    | -0.0294126 | 7.85777E-11 |
| INTS7      | 0.0361965  | 7.8862E-11  |
| GPATCH2L   | 0.17767703 | 7.89431E-11 |
| STK25      | -0.0132027 | 7.89462E-11 |
| ZNF721     | 0.10770112 | 7.90347E-11 |
| ACAT2      | 0.0511795  | 7.93461E-11 |
| PRDX4      | -0.0815781 | 7.95656E-11 |
| ARL2BP     | -0.1440557 | 7.95989E-11 |
| ZNF485     | 0.05700755 | 8.07668E-11 |
| ECI1       | -0.0264082 | 8.14263E-11 |
| MEN1       | 0.04510289 | 8.14286E-11 |
| MEGF6      | 0.04078608 | 8.20106E-11 |
| PXMP4      | 0.07931998 | 8.20883E-11 |
| CCDC62     | 0.06999363 | 8.25428E-11 |
| XPA        | 0.09845228 | 8.30751E-11 |
| METTL1     | 0.08180806 | 8.37141E-11 |
| TRIM23     | 0.0094546  | 8.3753E-11  |
| LSM3       | -0.031798  | 8.54841E-11 |
| NUDT18     | -0.072132  | 8.58932E-11 |
| CYREN      | -0.0015741 | 8.59895E-11 |
| XPO7       | 0.05876418 | 8.63067E-11 |
| FABP5      | 0.27206144 | 8.68995E-11 |
| ENTPD6     | 0.00870374 | 8.70857E-11 |
| ERCC1      | -0.0237378 | 8.75892E-11 |
| ARSK       | 0.04605301 | 8.76878E-11 |
| KRR1       | -0.0051968 | 8.77855E-11 |
| NCK2       | 0.02002894 | 8.85379E-11 |
| BTBD10     | -0.1532175 | 8.8868E-11  |
| SETD2      | -0.1610933 | 8.90315E-11 |
| GBE1       | 0.00530806 | 9.00054E-11 |
| PLEKHF2    | -0.0378558 | 9.00069E-11 |
| LINC00910  | 0.06828145 | 9.03339E-11 |
| ZZEF1      | 0.01857917 | 9.12227E-11 |



|                       |            |             |
|-----------------------|------------|-------------|
| ATPSCKMT              | 0.09492154 | 9.1235E-11  |
| RSBN1L                | -0.1860826 | 9.13022E-11 |
| PTGR2                 | 0.10266693 | 9.15409E-11 |
| EPGN                  | 0.06224211 | 9.17137E-11 |
| CCAR2                 | -0.0144347 | 9.20695E-11 |
| LIMA1                 | 0.07389266 | 9.22592E-11 |
| KRT8                  | 0.05823726 | 9.24897E-11 |
| EDEM1                 | -0.0425059 | 9.24974E-11 |
| CD7                   | -0.0833485 | 9.25073E-11 |
| TMEM223               | -0.0619651 | 9.26581E-11 |
| WDR20                 | -0.085075  | 9.33056E-11 |
| STAM2                 | 0.00351023 | 9.35001E-11 |
| TRMT2A                | 0.03582729 | 9.5137E-11  |
| BX842570.1            | 0.03848205 | 9.61451E-11 |
| GNPNAT1               | -0.1168768 | 9.7142E-11  |
| CHERP                 | -0.0107741 | 9.77313E-11 |
| ZNF669                | 0.02561555 | 9.77748E-11 |
| ATP6V1C1              | -0.027533  | 9.79042E-11 |
| PIGG                  | 0.02376234 | 9.79562E-11 |
| NAA25                 | 0.02989633 | 9.89079E-11 |
| SGF29                 | 0.1117314  | 9.9004E-11  |
| SF3A2                 | -0.0895803 | 9.9971E-11  |
| CCDC171               | 0.06720532 | 1.00744E-10 |
| AC139099.2            | -0.1386346 | 1.02397E-10 |
| AC018362.1            | 0.0887283  | 1.03591E-10 |
| FAM98C                | 0.01491377 | 1.03961E-10 |
| DNAJC7                | -0.1532845 | 1.04884E-10 |
| MAGEF1                | 0.05219052 | 1.05197E-10 |
| RNF25                 | -0.108365  | 1.05306E-10 |
| PISD                  | -0.0986508 | 1.06984E-10 |
| TESMIN                | 0.09811817 | 1.07364E-10 |
| CCT4                  | -0.0360651 | 1.07631E-10 |
| TAF6                  | -0.0317496 | 1.07659E-10 |
| LIMK2                 | -0.0463679 | 1.07743E-10 |
| MAIP1                 | -0.0350584 | 1.07954E-10 |
| IFI6                  | -0.0325372 | 1.07985E-10 |
| GBP3                  | 0.06229016 | 1.09007E-10 |
| ZNF629                | 0.00964086 | 1.09163E-10 |
| ZNF90                 | 0.09495553 | 1.09612E-10 |
| KMO                   | 0.0478248  | 1.10593E-10 |
| SNAPC1                | 0.06794725 | 1.11365E-10 |
| CGRRF1                | -0.1311143 | 1.1274E-10  |
| ATP6V0E1              | 0.20335114 | 1.12831E-10 |
| COG4                  | 0.06296689 | 1.13141E-10 |
| HNRNPA1P <sup>2</sup> | -0.1042691 | 1.13179E-10 |
| MRPL46                | -0.0118923 | 1.13624E-10 |
| LRCH3                 | 0.01108522 | 1.14482E-10 |
| TCEAL3                | -0.2157236 | 1.1504E-10  |
| DNAJB1                | 0.01602694 | 1.15362E-10 |
| POLR3E                | 0.05170018 | 1.15869E-10 |

|            |            |             |
|------------|------------|-------------|
| RXRA       | -0.0727186 | 1.16219E-10 |
| ZNF512B    | -0.0480524 | 1.1626E-10  |
| FAR1       | -0.1758392 | 1.16278E-10 |
| FBXO41     | 0.03651552 | 1.16704E-10 |
| PSMA3-AS1  | 0.22053106 | 1.17172E-10 |
| ALOX12-AS' | 0.05765356 | 1.1725E-10  |
| CHCHD5     | -0.0510089 | 1.17537E-10 |
| RPL19      | -0.1918924 | 1.17941E-10 |
| P2RY10     | 0.05976079 | 1.19672E-10 |
| RSBN1      | 0.04626003 | 1.20321E-10 |
| ACP6       | 0.06566618 | 1.20425E-10 |
| SELENOP    | 0.30744656 | 1.21233E-10 |
| COPS4      | -0.1696193 | 1.21566E-10 |
| NIPA2      | -0.0435337 | 1.21956E-10 |
| C3orf33    | 0.0563232  | 1.22033E-10 |
| USF1       | -0.0724459 | 1.23054E-10 |
| MYO9B      | -0.0064775 | 1.23702E-10 |
| PRRC2B     | 0.06634714 | 1.2452E-10  |
| TMTC2      | 0.06741524 | 1.24876E-10 |
| DPP7       | -0.1436528 | 1.25036E-10 |
| UNC93B1    | -0.0848712 | 1.25121E-10 |
| VPS28      | -0.0872519 | 1.26473E-10 |
| MICOS10    | 0.11944713 | 1.27482E-10 |
| ACD        | -0.0376221 | 1.29563E-10 |
| XPR1       | 0.0814629  | 1.308E-10   |
| ELK3       | 0.08765874 | 1.30973E-10 |
| PSMD5      | 0.00420808 | 1.31118E-10 |
| TRIM52     | 0.06318009 | 1.31356E-10 |
| DTD1       | 0.0092149  | 1.31542E-10 |
| CAPN15     | -0.020308  | 1.31591E-10 |
| HOXB4      | 0.0535815  | 1.31689E-10 |
| MMADHC     | 0.0573938  | 1.31817E-10 |
| RFT1       | 0.06892302 | 1.31859E-10 |
| UGP2       | 0.13741478 | 1.32054E-10 |
| WT1        | 0.04169829 | 1.32527E-10 |
| FAM13B     | 0.01754189 | 1.32783E-10 |
| SFXN5      | 0.08821352 | 1.3289E-10  |
| U91328.1   | 0.04218511 | 1.33219E-10 |
| CCDC189    | 0.03849674 | 1.33965E-10 |
| RBMXL1     | 0.032849   | 1.33984E-10 |
| WT1-AS     | 0.07040602 | 1.34053E-10 |
| DERL3      | 0.08865254 | 1.34409E-10 |
| ZNF649     | 0.05484016 | 1.35306E-10 |
| LRRRC69    | 0.05586764 | 1.3553E-10  |
| ANAPC4     | 0.04677433 | 1.35863E-10 |
| SMAGP      | 0.03456422 | 1.3638E-10  |
| PFKP       | -0.0665548 | 1.36469E-10 |
| STAM       | 0.05266374 | 1.38159E-10 |
| MAN1B1     | -0.0230624 | 1.38314E-10 |
| RPS26      | 0.20453107 | 1.38751E-10 |

|            |            |             |
|------------|------------|-------------|
| ZNF518B    | 0.08839077 | 1.40226E-10 |
| METTL17    | -0.0172972 | 1.40503E-10 |
| TMEM109    | 0.04506632 | 1.40809E-10 |
| MCAT       | -0.0889576 | 1.41717E-10 |
| NUBP1      | -0.073407  | 1.4179E-10  |
| ZNHIT2     | -0.0905886 | 1.42122E-10 |
| ARHGEF3    | -0.1247529 | 1.42494E-10 |
| EXOC6      | 0.02232143 | 1.43072E-10 |
| AC080038.1 | 0.05010932 | 1.45981E-10 |
| AC002558.3 | 0.00175992 | 1.46145E-10 |
| SMIM15     | 0.02678456 | 1.46756E-10 |
| PHRF1      | 0.00204588 | 1.48744E-10 |
| B3GNT5     | -0.066874  | 1.49044E-10 |
| RCOR3      | 0.15321587 | 1.50596E-10 |
| TXNRD1     | 0.05658295 | 1.50938E-10 |
| ERCC4      | 0.08929652 | 1.51022E-10 |
| PGPEP1     | -0.0779423 | 1.51965E-10 |
| PPAN       | -0.0963831 | 1.51976E-10 |
| FEM1C      | -0.0866595 | 1.52919E-10 |
| ZNF264     | -0.1059389 | 1.5399E-10  |
| THEM4      | 0.06967697 | 1.54114E-10 |
| AC102953.2 | 0.04154382 | 1.54448E-10 |
| NPAT       | 0.03967495 | 1.57945E-10 |
| RLF        | -0.0294275 | 1.58672E-10 |
| HNRNPLL    | 0.07465695 | 1.59504E-10 |
| ZMIZ1      | -0.0732348 | 1.59772E-10 |
| COTL1      | 0.04890755 | 1.60093E-10 |
| DAP        | -0.0555195 | 1.60276E-10 |
| LRRC27     | 0.07519802 | 1.60792E-10 |
| MARC1      | 0.05350905 | 1.61057E-10 |
| TMEM44     | 0.01218515 | 1.61172E-10 |
| GRINA      | 0.01520048 | 1.61457E-10 |
| AGO3       | 0.11824617 | 1.61579E-10 |
| C1orf35    | -0.0815491 | 1.61651E-10 |
| CORO1B     | 0.04675732 | 1.62188E-10 |
| AL162595.1 | 0.05804088 | 1.62383E-10 |
| GON4L      | -0.1442353 | 1.63046E-10 |
| DCAF5      | -0.0162357 | 1.63625E-10 |
| MECP2      | -0.0490605 | 1.63646E-10 |
| SP140L     | 0.04826112 | 1.65222E-10 |
| KDM2B      | 0.06042033 | 1.65634E-10 |
| STX11      | -0.1821135 | 1.66589E-10 |
| MALSU1     | -0.0043246 | 1.66901E-10 |
| ITPA       | 0.06932746 | 1.67182E-10 |
| POLE       | 0.01888506 | 1.67374E-10 |
| DIDO1      | -0.0439444 | 1.68093E-10 |
| BOLA2      | 0.03265924 | 1.6996E-10  |
| SMARCD1    | 0.02263744 | 1.70482E-10 |
| ZFAND6     | -0.1258615 | 1.70765E-10 |
| HIPK3      | -0.1350368 | 1.71582E-10 |

|            |            |             |
|------------|------------|-------------|
| PTOV1      | -0.0657498 | 1.73152E-10 |
| ANKRD13C   | -0.0012008 | 1.73201E-10 |
| CLEC11A    | 0.13871773 | 1.73903E-10 |
| MED16      | -0.0177822 | 1.74185E-10 |
| LCT        | -0.1225769 | 1.74543E-10 |
| KLF16      | -0.129339  | 1.7474E-10  |
| RTCA       | -0.0656065 | 1.75174E-10 |
| PCYT1A     | -0.0884756 | 1.75841E-10 |
| BTA1F1     | -0.0435491 | 1.76166E-10 |
| TMEM184B   | -0.0697193 | 1.76585E-10 |
| ZC3H12A    | -0.1549924 | 1.76599E-10 |
| ADAM8      | -0.1883603 | 1.76714E-10 |
| RAB30-DT   | 0.06610767 | 1.77389E-10 |
| ANKRD36C   | 0.1289763  | 1.77579E-10 |
| PDLIM5     | 0.04022718 | 1.80425E-10 |
| GAB2       | -0.1335093 | 1.80611E-10 |
| AC004865.2 | -0.0271587 | 1.82145E-10 |
| FAHD2B     | 0.04474888 | 1.82197E-10 |
| CLIC2      | 0.06914808 | 1.82306E-10 |
| LNCAROD    | 0.1018785  | 1.82369E-10 |
| CTDP1      | -0.0958844 | 1.83868E-10 |
| OLA1       | 0.14350071 | 1.84362E-10 |
| PEX2       | -0.0236784 | 1.84521E-10 |
| MED29      | -0.0544011 | 1.84944E-10 |
| FAM98A     | 0.06156982 | 1.85246E-10 |
| RTTN       | 0.0550912  | 1.8528E-10  |
| SPAG1      | -0.1521403 | 1.85712E-10 |
| ASB13      | 0.08612682 | 1.86286E-10 |
| C11orf49   | 0.0347383  | 1.86325E-10 |
| SPDYE3     | 0.06012655 | 1.87001E-10 |
| AP000766.1 | 0.05794659 | 1.87149E-10 |
| SLC1A4     | 0.05565377 | 1.88113E-10 |
| FTO        | 0.07976829 | 1.88921E-10 |
| AC097376.3 | 0.06839718 | 1.89923E-10 |
| PDE12      | 0.0082159  | 1.91776E-10 |
| LBHD1      | 0.03180002 | 1.93119E-10 |
| SUPT4H1    | -0.0583631 | 1.93674E-10 |
| FUS        | 0.27035642 | 1.94838E-10 |
| STAT4      | -0.1197421 | 1.97018E-10 |
| ITGAV      | 0.05196853 | 1.97374E-10 |
| RPL21      | 0.14901322 | 1.97537E-10 |
| SKIL       | -0.0818801 | 1.98071E-10 |
| DNAJC15    | -0.1672823 | 1.98148E-10 |
| ERMARD     | 0.0504457  | 1.98654E-10 |
| KLHDC10    | -0.0759283 | 1.98983E-10 |
| DNTTIP2    | -0.0305586 | 1.99056E-10 |
| LINC00963  | 0.03147189 | 1.99114E-10 |
| PPP1R2     | -0.092882  | 1.99374E-10 |
| NKRF       | 0.00168237 | 2.0135E-10  |
| ATOX1      | -0.1294992 | 2.01956E-10 |

|            |            |             |
|------------|------------|-------------|
| PIK3AP1    | 0.13292494 | 2.01994E-10 |
| ODR4       | 0.04880972 | 2.04036E-10 |
| UBXN8      | 0.04861914 | 2.04629E-10 |
| HYOU1      | -0.0007666 | 2.05753E-10 |
| HELLS      | -0.1459924 | 2.0645E-10  |
| TGFBRAP1   | -0.0622251 | 2.06985E-10 |
| AZIN1-AS1  | 0.04248813 | 2.07791E-10 |
| KLHL5      | -0.0297004 | 2.08341E-10 |
| AAGAB      | -0.0728517 | 2.08423E-10 |
| DGCR2      | 0.03567167 | 2.10459E-10 |
| HSD17B7    | 0.0405077  | 2.10793E-10 |
| MNT        | -0.1089995 | 2.1122E-10  |
| SLC25A29   | -0.0859763 | 2.1138E-10  |
| GAA        | -0.008875  | 2.12216E-10 |
| TTPAL      | -0.0299215 | 2.12869E-10 |
| TPGS2      | -0.0235672 | 2.13355E-10 |
| SMG5       | -0.0244336 | 2.13363E-10 |
| COPS8      | -0.0823154 | 2.15666E-10 |
| AC091607.2 | 0.06747234 | 2.16391E-10 |
| G3BP1      | 0.26241138 | 2.16769E-10 |
| XPO6       | 0.03098575 | 2.17194E-10 |
| CEP120     | 0.09121528 | 2.18422E-10 |
| FBXL17     | 0.08143694 | 2.18921E-10 |
| STAP1      | -0.1419743 | 2.19536E-10 |
| METTL14    | -0.0175192 | 2.23206E-10 |
| RBM18      | 0.01060778 | 2.2435E-10  |
| ZFC3H1     | 0.13962569 | 2.24535E-10 |
| PRKRIP1    | -0.0403758 | 2.24673E-10 |
| AP1S2      | 0.12758747 | 2.25224E-10 |
| PTPN7      | -0.1212676 | 2.25843E-10 |
| CDK2       | 0.00036636 | 2.25887E-10 |
| EXOSC7     | 0.04225437 | 2.26936E-10 |
| ERMAP      | 0.05078073 | 2.27059E-10 |
| LEPROT     | 0.09130126 | 2.27509E-10 |
| ABL1       | -0.0307271 | 2.2782E-10  |
| LINC01003  | -0.0876028 | 2.29119E-10 |
| MRPL20     | 0.1201803  | 2.29292E-10 |
| IL10RB     | 0.00600834 | 2.31143E-10 |
| CPNE2      | -0.1129517 | 2.33923E-10 |
| ANKRD54    | -0.0500976 | 2.35179E-10 |
| SLC10A7    | 0.04389656 | 2.35705E-10 |
| ANGPT2     | 0.05744818 | 2.35984E-10 |
| NDUFS8     | -0.0301016 | 2.37088E-10 |
| AP1G2      | -0.0424688 | 2.39945E-10 |
| NFE2       | 0.17381365 | 2.4181E-10  |
| QTRT2      | -0.0073069 | 2.43316E-10 |
| GSTM2      | 0.03056174 | 2.45125E-10 |
| GLCCI1     | 0.06607793 | 2.4544E-10  |
| MAP1A      | -0.2432424 | 2.45758E-10 |
| NCOA2      | 0.04876379 | 2.45935E-10 |

|            |            |             |
|------------|------------|-------------|
| COG8       | 0.05446018 | 2.46182E-10 |
| SELENON    | 0.04325885 | 2.49352E-10 |
| ZNF768     | 0.01320474 | 2.50498E-10 |
| CAVIN2     | -0.030682  | 2.51571E-10 |
| IMPA1      | 0.03611765 | 2.51633E-10 |
| RGP1       | -0.0313731 | 2.53043E-10 |
| RASSF3     | 0.00098517 | 2.54729E-10 |
| MAD1L1     | 0.04311213 | 2.55442E-10 |
| RBBP7      | 0.03788038 | 2.55589E-10 |
| AC127502.2 | -0.0281786 | 2.56264E-10 |
| RETREG3    | -0.0415853 | 2.58154E-10 |
| BCAT2      | 0.06496302 | 2.58582E-10 |
| AC002454.1 | 0.03220939 | 2.60055E-10 |
| ZFYVE21    | -0.0262466 | 2.60266E-10 |
| RNF38      | -0.116856  | 2.62887E-10 |
| PFKL       | -0.0188197 | 2.63085E-10 |
| RPSA       | -0.2735422 | 2.65108E-10 |
| CEP97      | 0.08479318 | 2.66713E-10 |
| TMEM183A   | 0.0008101  | 2.66906E-10 |
| PHPT1      | -0.0114157 | 2.69479E-10 |
| AP5B1      | 0.07151929 | 2.71035E-10 |
| BRWD1      | 0.10134128 | 2.73847E-10 |
| RBKS       | 0.06490311 | 2.74509E-10 |
| MRPL13     | -0.0844268 | 2.74728E-10 |
| HIST1H2AH  | 0.05623177 | 2.74879E-10 |
| HCFC2      | -0.1230957 | 2.75291E-10 |
| RIF1       | 0.07484119 | 2.75516E-10 |
| ABCC5      | 0.06818166 | 2.77281E-10 |
| SZT2       | 0.0423989  | 2.7782E-10  |
| CSRP1      | 0.0542086  | 2.79027E-10 |
| NUP214     | 0.09515855 | 2.80137E-10 |
| NRSN2-AS1  | 0.05529728 | 2.82948E-10 |
| TSTD3      | 0.04525022 | 2.84191E-10 |
| BCL10      | -0.044359  | 2.85136E-10 |
| CEP85      | 0.06678685 | 2.86444E-10 |
| GTF2H1     | 0.02532826 | 2.87404E-10 |
| ZCWPW1     | 0.05946672 | 2.88164E-10 |
| FXR2       | -0.045529  | 2.89842E-10 |
| TMEM222    | -0.0303902 | 2.90204E-10 |
| PRCP       | 0.02778801 | 2.91399E-10 |
| MAEA       | -0.0552846 | 2.91463E-10 |
| BIRC6      | 0.0882705  | 2.9184E-10  |
| UBE3A      | -0.1001477 | 2.93774E-10 |
| OGFR       | 0.01728285 | 2.93805E-10 |
| TNKS       | 0.02443843 | 2.94253E-10 |
| THAP7      | 0.00312706 | 2.95034E-10 |
| AL354822.1 | 0.06010406 | 2.95666E-10 |
| CGAS       | 0.1084111  | 2.96793E-10 |
| RAMP1      | 0.0896127  | 2.98207E-10 |
| ZNF589     | 0.04375963 | 2.99504E-10 |

|            |            |             |
|------------|------------|-------------|
| HDGFL2     | 0.01139506 | 3.00358E-10 |
| MARVELD1   | 0.05524332 | 3.01602E-10 |
| SPIN2B     | 0.05637425 | 3.04615E-10 |
| NDUFA1     | 0.21184422 | 3.07682E-10 |
| GTF3C5     | -0.0698248 | 3.08953E-10 |
| DHRS11     | 0.08538517 | 3.09998E-10 |
| KCTD18     | 0.04351991 | 3.10869E-10 |
| UBE2Q1     | 0.11021316 | 3.1679E-10  |
| DHRS4L2    | 0.08087955 | 3.19373E-10 |
| CCDC77     | 0.05393708 | 3.22676E-10 |
| RFC1       | -0.137852  | 3.23817E-10 |
| SCAMP2     | -0.1251578 | 3.25345E-10 |
| CDC37L1    | 0.00877567 | 3.25477E-10 |
| NT5C2      | 0.00352677 | 3.25908E-10 |
| ARHGAP35   | 0.03848219 | 3.26344E-10 |
| SNX5       | 0.01351389 | 3.27634E-10 |
| MEAF6      | -0.0096976 | 3.2842E-10  |
| CXCL8      | -0.8631588 | 3.29502E-10 |
| FAM193B    | -0.0055032 | 3.30622E-10 |
| ADGRE1     | 0.08062728 | 3.31519E-10 |
| ZNF337-AS1 | 0.05966482 | 3.32067E-10 |
| EXOC8      | 0.0502434  | 3.33972E-10 |
| SRP19      | -0.1276986 | 3.34171E-10 |
| RALGAPA1   | -0.1336445 | 3.35692E-10 |
| MTFP1      | -0.0098308 | 3.37657E-10 |
| DCAF1      | -0.0042498 | 3.39785E-10 |
| CCDC43     | 0.00656818 | 3.45754E-10 |
| TAB3       | -0.0174282 | 3.46043E-10 |
| MINDY2     | -0.1451217 | 3.46999E-10 |
| SCOC       | 0.02411715 | 3.52489E-10 |
| CACNA2D4   | 0.04372655 | 3.5322E-10  |
| NMB        | 0.02353335 | 3.54388E-10 |
| CCT6B      | 0.05604542 | 3.56785E-10 |
| ZDHHC14    | 0.05324769 | 3.57428E-10 |
| COP1       | -0.0102804 | 3.58096E-10 |
| PHKA2      | 0.09474486 | 3.59084E-10 |
| CEP164     | 0.04966015 | 3.61072E-10 |
| ZKSCAN8    | 0.04205407 | 3.62101E-10 |
| CYB561     | -0.1075125 | 3.64225E-10 |
| CENPC      | -0.0254234 | 3.6431E-10  |
| AC025171.1 | 0.12600683 | 3.71289E-10 |
| MAP4K5     | 0.0205697  | 3.72072E-10 |
| KLHL20     | -0.0206863 | 3.72454E-10 |
| SMARCA2    | 0.19305131 | 3.74093E-10 |
| DICER1     | 0.15630691 | 3.83664E-10 |
| NDUFAF1    | 0.04500164 | 3.89376E-10 |
| FYCO1      | 0.03814839 | 3.9392E-10  |
| NFX1       | -0.0617261 | 3.95802E-10 |
| CDKN1C     | 0.25287265 | 3.9599E-10  |
| XRCC1      | 0.00058611 | 4.00859E-10 |

|            |            |             |
|------------|------------|-------------|
| KCTD2      | -0.030142  | 4.02926E-10 |
| POGK       | 0.07536135 | 4.06216E-10 |
| KLHL8      | 0.09105871 | 4.13153E-10 |
| MTG1       | 0.04011014 | 4.14524E-10 |
| POLR1C     | 0.05144587 | 4.14552E-10 |
| PGM1       | 0.07872242 | 4.18607E-10 |
| NIBAN2     | -0.1095427 | 4.19494E-10 |
| AL109615.4 | 0.06227389 | 4.19636E-10 |
| ZNF7       | 0.02614859 | 4.20329E-10 |
| RRP8       | -0.0220411 | 4.24961E-10 |
| MRGBP      | 0.04796605 | 4.25463E-10 |
| NSMCE2     | 0.01994866 | 4.25581E-10 |
| USP16      | -0.1701177 | 4.25887E-10 |
| PITPNA     | -0.052863  | 4.28787E-10 |
| ZNF419     | -0.0023455 | 4.29558E-10 |
| SIAH1      | -0.0208942 | 4.31473E-10 |
| C11orf21   | -0.082588  | 4.32428E-10 |
| DENND4C    | 0.01304636 | 4.3301E-10  |
| SEC24B-AS1 | 0.04484614 | 4.34123E-10 |
| MEF2C-AS1  | 0.04043846 | 4.40323E-10 |
| MAD2L1BP   | -0.1142808 | 4.41527E-10 |
| METTL9     | -0.0581832 | 4.41608E-10 |
| AP5Z1      | -0.0534128 | 4.47762E-10 |
| ARMC8      | -0.0220271 | 4.50872E-10 |
| NUBP2      | 0.05150883 | 4.51043E-10 |
| ISCU       | 0.21775463 | 4.53863E-10 |
| SPCS3      | -0.1494784 | 4.5732E-10  |
| SUMF2      | 0.13668767 | 4.58094E-10 |
| TUBE1      | -0.0119352 | 4.644E-10   |
| SEPTIN1    | -0.1090976 | 4.65939E-10 |
| WDR27      | 0.07453948 | 4.68689E-10 |
| ZDHHC18    | -0.1193083 | 4.7425E-10  |
| LYPLA1     | 0.13135128 | 4.74376E-10 |
| ZNF45      | 0.0112878  | 4.74961E-10 |
| ATN1       | -0.0167881 | 4.79615E-10 |
| ZDHHC23    | -0.0554508 | 4.79715E-10 |
| SCD5       | -0.1193153 | 4.80088E-10 |
| HEXA       | -0.0878792 | 4.85955E-10 |
| PMEPA1     | -0.1783589 | 4.90065E-10 |
| PI4KA      | 0.118849   | 4.90618E-10 |
| PMM2       | 0.09318019 | 4.94777E-10 |
| PREB       | 0.03798101 | 4.9508E-10  |
| TMEM267    | 0.0856365  | 4.96821E-10 |
| DUSP12     | -0.0513229 | 5.01688E-10 |
| AGA        | 0.05352684 | 5.04531E-10 |
| GFM2       | 0.05889733 | 5.06081E-10 |
| ITPRIPL2   | 0.01790451 | 5.06733E-10 |
| KPNA3      | -0.0314861 | 5.06918E-10 |
| RSF1       | -0.1860459 | 5.07636E-10 |
| URB1       | 0.10834011 | 5.07809E-10 |



|            |            |             |
|------------|------------|-------------|
| ZNF646     | 0.01985842 | 5.07846E-10 |
| SETD4      | -0.0275885 | 5.07982E-10 |
| C12orf73   | 0.04752317 | 5.08766E-10 |
| APTX       | 0.01693424 | 5.09043E-10 |
| AC025159.1 | 0.02939966 | 5.1162E-10  |
| TMEM9B-AS  | 0.07902731 | 5.11926E-10 |
| ZKSCAN5    | 0.02062403 | 5.16372E-10 |
| HERC1      | -0.0097118 | 5.17275E-10 |
| CHRNA1     | 0.01577414 | 5.20835E-10 |
| TBPL1      | -0.0458709 | 5.22795E-10 |
| NUP35      | 0.04063344 | 5.23769E-10 |
| L3MBTL3    | 0.07779613 | 5.24758E-10 |
| FAM168B    | -0.0697354 | 5.26178E-10 |
| BZW1       | -0.1919417 | 5.2634E-10  |
| DAPK1      | -0.1126031 | 5.27751E-10 |
| NOC4L      | -0.019395  | 5.28763E-10 |
| GSE1       | -0.0195382 | 5.31253E-10 |
| PRDX5      | -0.2424344 | 5.34118E-10 |
| NACC1      | -0.1037246 | 5.3486E-10  |
| BAG5       | 0.042242   | 5.35E-10    |
| SFXN4      | 0.102279   | 5.37675E-10 |
| CCDC34     | 0.12076406 | 5.40509E-10 |
| RNGTT      | 0.00796939 | 5.41466E-10 |
| PEX13      | -0.1150539 | 5.4181E-10  |
| ALG9       | 0.02656482 | 5.45402E-10 |
| POR        | 0.03354057 | 5.45544E-10 |
| JAK3       | -0.1292981 | 5.50499E-10 |
| CHKB-DT    | 0.05818065 | 5.50778E-10 |
| YEATS2     | 0.03250949 | 5.51495E-10 |
| PLCE1      | 0.05659442 | 5.5163E-10  |
| TAF3       | 0.05806272 | 5.52867E-10 |
| B3GNT2     | 0.08510693 | 5.52965E-10 |
| TBXA2R     | -0.1306729 | 5.54073E-10 |
| ZDHHC5     | -0.0097093 | 5.57143E-10 |
| HPS4       | 0.02071297 | 5.59964E-10 |
| PPP3CB     | 0.06080488 | 5.60303E-10 |
| MRPS18C    | 0.14988658 | 5.60419E-10 |
| KPNA1      | -0.0632983 | 5.61012E-10 |
| RBBP8      | 0.03641792 | 5.61093E-10 |
| BIVM       | 0.07259716 | 5.63494E-10 |
| TTL12      | 0.04551203 | 5.64589E-10 |
| MED13      | -0.0383143 | 5.65396E-10 |
| ANKRD42    | -0.0606225 | 5.66081E-10 |
| HDAC5      | -0.1118823 | 5.66333E-10 |
| ZNF507     | 0.0993411  | 5.68352E-10 |
| SECISBP2   | 0.00577333 | 5.69398E-10 |
| BCAT1      | -0.0199034 | 5.75322E-10 |
| POLRMT     | 0.07065696 | 5.8093E-10  |
| PDCD7      | 0.0786502  | 5.82755E-10 |
| PRRC2C     | -0.2675474 | 5.84131E-10 |

|            |            |             |
|------------|------------|-------------|
| CD59       | -0.0922978 | 5.85122E-10 |
| AKR7A2     | -0.0485759 | 5.85129E-10 |
| EXOSC9     | 0.02269941 | 5.901E-10   |
| MED19      | -0.1317572 | 5.94289E-10 |
| SPSB2      | -0.0677835 | 5.94391E-10 |
| CD33       | -0.1133728 | 5.94692E-10 |
| ATP13A2    | -0.0560871 | 5.98046E-10 |
| TOM1L2     | -0.0547458 | 6.07739E-10 |
| TKFC       | -0.0075825 | 6.17444E-10 |
| MCMBP      | 0.07081385 | 6.2563E-10  |
| TYSND1     | 0.04732284 | 6.30501E-10 |
| LRP8       | -0.0682308 | 6.40644E-10 |
| ZNF791     | 0.03195593 | 6.45062E-10 |
| H1FO       | -0.0832729 | 6.46421E-10 |
| MYO18A     | 0.11180823 | 6.48389E-10 |
| TCTN1      | -0.0534102 | 6.52699E-10 |
| KIF23      | 0.06487962 | 6.55783E-10 |
| SLC16A1    | 0.05988951 | 6.56113E-10 |
| NDUFA7     | 0.01215629 | 6.59942E-10 |
| TRIP4      | 0.06948766 | 6.64849E-10 |
| CNTROB     | 0.023474   | 6.70181E-10 |
| GBA        | 0.02610369 | 6.72155E-10 |
| AL512625.3 | -0.034323  | 6.72597E-10 |
| SMIM3      | -0.2198149 | 6.74129E-10 |
| NBPF26     | 0.03988364 | 6.74347E-10 |
| IL2RG      | -0.3322644 | 6.7448E-10  |
| ZNF331     | -0.0007078 | 6.74595E-10 |
| SHC1       | -0.0426611 | 6.77448E-10 |
| PEX6       | 0.05056607 | 6.78551E-10 |
| POGZ       | -0.0641421 | 6.80216E-10 |
| AC245060.6 | 0.0503279  | 6.80715E-10 |
| MAML3      | 0.09545356 | 6.85074E-10 |
| UROS       | 0.20217822 | 6.90477E-10 |
| RFX5       | 0.03331468 | 6.91443E-10 |
| TPX2       | 0.02703252 | 6.96E-10    |
| TRIM2      | 0.07680585 | 7.03435E-10 |
| CCDC102A   | -0.0203808 | 7.04417E-10 |
| ATXN1L     | -0.0872935 | 7.06514E-10 |
| TMEM141    | -0.017367  | 7.12102E-10 |
| EIF1AD     | -0.0804058 | 7.22047E-10 |
| NDRG1      | 0.11714243 | 7.28699E-10 |
| MCRS1      | 0.01753718 | 7.41837E-10 |
| TASOR2     | 0.11745983 | 7.44669E-10 |
| CTDSP2     | -0.0930972 | 7.45693E-10 |
| IFI27L2    | 0.10300639 | 7.5023E-10  |
| STRADA     | 0.00032464 | 7.52011E-10 |
| CCNL2      | -0.1119296 | 7.54268E-10 |
| GNRH1      | -0.1107409 | 7.54599E-10 |
| SNHG16     | 0.21912847 | 7.60431E-10 |
| ZNF266     | 0.00128657 | 7.6171E-10  |

|            |            |             |
|------------|------------|-------------|
| IFFO1      | 0.03954323 | 7.61978E-10 |
| BYSL       | -0.0085042 | 7.69501E-10 |
| TSC2       | 0.01832669 | 7.70268E-10 |
| CUL4A      | 0.04209293 | 7.70914E-10 |
| HOMEZ      | 0.04013707 | 7.73696E-10 |
| CD3EAP     | 0.08789477 | 7.75474E-10 |
| RABGGTA    | 0.04358158 | 7.79904E-10 |
| ZNF724     | 0.06882558 | 7.92496E-10 |
| NANP       | 0.01327254 | 7.97675E-10 |
| NAA35      | -0.0110876 | 7.98907E-10 |
| C12orf57   | 0.13464608 | 8.04032E-10 |
| DET1       | 0.05717628 | 8.04784E-10 |
| DPP9       | -0.0276348 | 8.05459E-10 |
| GPR89B     | 0.05004959 | 8.08662E-10 |
| IMPAD1     | -0.0148643 | 8.09534E-10 |
| TTC27      | 0.06741642 | 8.10598E-10 |
| HNRNPF     | -0.1991311 | 8.12432E-10 |
| HS6ST1     | 0.09853107 | 8.13382E-10 |
| GPR180     | 0.06320742 | 8.13665E-10 |
| CHST10     | 0.03852441 | 8.17966E-10 |
| CTPS2      | 0.00890424 | 8.18221E-10 |
| USF3       | 0.03284283 | 8.18791E-10 |
| GTF3C4     | -0.018957  | 8.21556E-10 |
| PRMT9      | 0.02775992 | 8.29938E-10 |
| GPATCH3    | 0.00312614 | 8.4514E-10  |
| AC092338.3 | 0.04162353 | 8.52082E-10 |
| SLC1A3     | 0.05827533 | 8.5316E-10  |
| MEF2D      | -0.092228  | 8.56376E-10 |
| NUDT15     | 0.04418954 | 8.68136E-10 |
| LCMT1      | 0.00508502 | 8.68493E-10 |
| USP42      | -0.0474321 | 8.79025E-10 |
| RGL2       | -0.1391293 | 8.81879E-10 |
| TTF1       | -0.05193   | 8.82498E-10 |
| SPTY2D1    | -0.1402332 | 8.85735E-10 |
| NELFCD     | -0.0163854 | 8.86003E-10 |
| AC058791.1 | -0.1438958 | 8.86519E-10 |
| COQ8B      | -0.0225353 | 8.90967E-10 |
| CCT2       | 0.03115377 | 8.92883E-10 |
| NAT9       | -0.0641202 | 8.94589E-10 |
| POLD4      | -0.0076122 | 8.9634E-10  |
| RAVER1     | -0.0091336 | 8.9858E-10  |
| HPS5       | -0.0015653 | 8.99829E-10 |
| DCP1B      | 0.0037233  | 9.06108E-10 |
| RGPD5      | -0.0270383 | 9.11511E-10 |
| CAMKMT     | 0.05632507 | 9.14705E-10 |
| DCTN1      | 0.03157393 | 9.15523E-10 |
| SREK1IP1   | -0.0019981 | 9.17948E-10 |
| PTGDS      | 0.43985925 | 9.27181E-10 |
| FCGRT      | 0.10710294 | 9.2794E-10  |
| FGD4       | 0.04162462 | 9.37676E-10 |

|            |            |             |
|------------|------------|-------------|
| SLC31A2    | -0.0986315 | 9.46329E-10 |
| MORN2      | 0.00249563 | 9.58413E-10 |
| ABHD18     | 0.0497516  | 9.60513E-10 |
| ANKRD33B   | 0.07381435 | 9.6113E-10  |
| NME3       | 0.05951103 | 9.62275E-10 |
| MMP17      | 0.04395292 | 9.66695E-10 |
| ARHGAP22   | 0.16315618 | 9.69286E-10 |
| CARD8      | 0.14321985 | 9.7116E-10  |
| TBKBP1     | -0.0697283 | 9.72929E-10 |
| CS         | 0.08532859 | 9.73944E-10 |
| PHF10      | 0.04060663 | 9.74028E-10 |
| PRDX6      | -0.2121058 | 9.8238E-10  |
| LINC02482  | 0.07859956 | 9.8535E-10  |
| CLDND2     | -0.1562057 | 9.90477E-10 |
| VKORC1     | -0.0199855 | 9.94095E-10 |
| DYNC1LI2   | -0.1093396 | 9.95593E-10 |
| FBXO6      | 0.03687151 | 1.00066E-09 |
| AL391684.1 | 0.04336894 | 1.00678E-09 |
| VPS13A     | 0.10322127 | 1.01348E-09 |
| SLC39A9    | 0.08946882 | 1.014E-09   |
| PGBD1      | 0.03252068 | 1.02185E-09 |
| AUTS2      | -0.0320383 | 1.02825E-09 |
| MARK3      | -0.067709  | 1.04134E-09 |
| TUBGCP2    | -0.0659546 | 1.04641E-09 |
| TXNDC11    | -0.0550181 | 1.04928E-09 |
| HSBP1L1    | -0.0110527 | 1.06169E-09 |
| FAM149B1   | 0.0169288  | 1.06627E-09 |
| IGHMBP2    | -0.0846903 | 1.07797E-09 |
| MIR181A1HC | 0.02373159 | 1.08017E-09 |
| RBMS1      | -0.1748591 | 1.08489E-09 |
| CCNQ       | -0.0892753 | 1.08675E-09 |
| HSPA13     | -0.0864262 | 1.0909E-09  |
| HIST1H4J   | 0.07362882 | 1.09214E-09 |
| UTP23      | 0.05398344 | 1.10011E-09 |
| ASMTL      | -0.1374843 | 1.10416E-09 |
| MRPL38     | 0.03174347 | 1.10606E-09 |
| AC020915.2 | 0.06180247 | 1.10607E-09 |
| POLH       | 0.0815912  | 1.10627E-09 |
| LMBR1L     | -0.0725803 | 1.11667E-09 |
| C12orf4    | 0.06365929 | 1.12028E-09 |
| AP5M1      | 0.11313787 | 1.12598E-09 |
| TRAF3IP1   | 0.1255342  | 1.13797E-09 |
| CTSS       | 0.20302514 | 1.14467E-09 |
| NF1        | 0.06891558 | 1.16194E-09 |
| FANCM      | 0.07457493 | 1.16794E-09 |
| MILR1      | -0.0553486 | 1.16827E-09 |
| JTB        | 0.14134158 | 1.1791E-09  |
| OXSM       | -0.0065259 | 1.18236E-09 |
| PSIP1      | -0.0076947 | 1.18557E-09 |
| TM2D2      | 0.02086536 | 1.18902E-09 |

|            |            |             |
|------------|------------|-------------|
| ZCCHC2     | 0.00160684 | 1.18906E-09 |
| CPT2       | 0.02920377 | 1.19268E-09 |
| PHYH       | 0.06289445 | 1.1953E-09  |
| REXO5      | 0.06736576 | 1.19787E-09 |
| AKIP1      | -0.0056146 | 1.21387E-09 |
| MANEA-DT   | 0.03418423 | 1.21461E-09 |
| DIAPH1     | -0.0512255 | 1.2175E-09  |
| WDR6       | -0.0065026 | 1.22512E-09 |
| PPP1R3D    | 0.07032907 | 1.22887E-09 |
| UHRF1BP1L  | -0.0085893 | 1.23361E-09 |
| SNX6       | -0.0226314 | 1.24109E-09 |
| IGF2BP2    | -0.0994334 | 1.24522E-09 |
| ZNF805     | -0.0188163 | 1.25643E-09 |
| WIPF2      | -0.1118634 | 1.2589E-09  |
| ABCF1      | -0.0394096 | 1.2623E-09  |
| MAN2B1     | 0.02579588 | 1.26741E-09 |
| CU638689.4 | 0.0598661  | 1.27008E-09 |
| AC015871.4 | 0.03879471 | 1.27533E-09 |
| MVB12B     | 0.03123622 | 1.2777E-09  |
| ATP6V1E1   | 0.03053189 | 1.28349E-09 |
| LRRC34     | 0.06304064 | 1.2894E-09  |
| NUDT16     | 0.05252704 | 1.29364E-09 |
| TAF5L      | -0.0492293 | 1.30231E-09 |
| GALNS      | 0.00280541 | 1.30497E-09 |
| LMAN2L     | 0.04856692 | 1.31672E-09 |
| AC026979.2 | -0.1826358 | 1.31825E-09 |
| CREB3L4    | 0.09265113 | 1.31834E-09 |
| TGOLN2     | 0.15548284 | 1.3191E-09  |
| DNAJB9     | -0.0282446 | 1.32775E-09 |
| ZFP82      | 0.04761342 | 1.32988E-09 |
| MUL1       | -0.0611856 | 1.33345E-09 |
| KRBOX4     | 0.01777024 | 1.33617E-09 |
| TRGC1      | -0.0174429 | 1.35376E-09 |
| DTX2       | -0.0049398 | 1.35714E-09 |
| TUSC2      | -0.0786283 | 1.36456E-09 |
| PSMG3-AS1  | 0.03512154 | 1.3656E-09  |
| PUS1       | 0.0663181  | 1.3732E-09  |
| LSM7       | -0.251323  | 1.37802E-09 |
| GPR107     | -0.070563  | 1.38398E-09 |
| LRRC8C-DT  | -0.026352  | 1.38429E-09 |
| P2RX5      | 0.12987123 | 1.38945E-09 |
| F8A1       | 0.06696622 | 1.40175E-09 |
| CYC1       | -0.0069155 | 1.40581E-09 |
| MLC1       | -0.0627082 | 1.41002E-09 |
| SNX16      | 0.04303514 | 1.41048E-09 |
| TLR6       | 0.0516216  | 1.41079E-09 |
| MTRF1L     | -0.136277  | 1.41087E-09 |
| ROMO1      | 0.08807559 | 1.41746E-09 |
| SPICE1     | 0.07870325 | 1.42391E-09 |
| ARMC6      | 0.06119948 | 1.4245E-09  |

|            |            |             |
|------------|------------|-------------|
| ZNF576     | 0.00732826 | 1.43819E-09 |
| NVL        | 0.01982347 | 1.44803E-09 |
| CCNI       | -0.2573469 | 1.4534E-09  |
| NEMP2      | 0.03948827 | 1.45512E-09 |
| ZDHHC13    | 0.0704699  | 1.4589E-09  |
| METTL6     | 0.03173981 | 1.45971E-09 |
| UNC13D     | -0.0301536 | 1.46532E-09 |
| PXMP2      | -0.0105348 | 1.46565E-09 |
| SOCS4      | 0.11829211 | 1.47437E-09 |
| AL158152.1 | 0.03837146 | 1.48073E-09 |
| CASP10     | -0.1477866 | 1.48157E-09 |
| COMMD5     | 0.01494745 | 1.48695E-09 |
| MTF1       | -0.0289952 | 1.49174E-09 |
| ZSWIM9     | 0.06202509 | 1.49636E-09 |
| GSTCD      | 0.06718013 | 1.4979E-09  |
| RDH11      | 0.035033   | 1.51415E-09 |
| PKN1       | -0.0046412 | 1.51699E-09 |
| MYLPF      | 0.13395898 | 1.52213E-09 |
| FBXL19     | 0.02530452 | 1.52551E-09 |
| LYZ        | 0.42146657 | 1.53503E-09 |
| NADK       | -0.0235927 | 1.5551E-09  |
| ZNF407     | -0.0101193 | 1.55615E-09 |
| AC027097.2 | 0.05765096 | 1.56472E-09 |
| LMBR1      | 0.01062886 | 1.57728E-09 |
| TESK1      | -0.1047618 | 1.58192E-09 |
| TMEM39A    | -0.032728  | 1.58897E-09 |
| ADAP1      | 0.03618518 | 1.58927E-09 |
| ACP1       | 0.02264097 | 1.60373E-09 |
| ILRUN      | -0.0232727 | 1.61212E-09 |
| CLIP1      | 0.04975404 | 1.6288E-09  |
| TERF2IP    | -0.1735479 | 1.64801E-09 |
| CYB5R1     | 0.01507947 | 1.67141E-09 |
| UBR4       | 0.02843932 | 1.67464E-09 |
| DDX27      | 0.13075561 | 1.6771E-09  |
| NPRL3      | 0.07868475 | 1.69072E-09 |
| PABPN1     | -0.0855071 | 1.70127E-09 |
| TACO1      | -0.0854789 | 1.71117E-09 |
| GATA2      | 0.46185512 | 1.71363E-09 |
| CDK2AP1    | 0.02765946 | 1.71976E-09 |
| RARS       | 0.07320605 | 1.74795E-09 |
| INTS12     | 0.02058352 | 1.74929E-09 |
| ZNF318     | 0.05879188 | 1.77287E-09 |
| ANKRD36B   | 0.04243677 | 1.77728E-09 |
| OSBPL2     | 0.02651574 | 1.77735E-09 |
| GYPC       | -0.2069752 | 1.77881E-09 |
| MAPK8      | -0.0936119 | 1.81761E-09 |
| FLNA       | 0.04073369 | 1.82588E-09 |
| GALM       | 0.08398307 | 1.82922E-09 |
| ZNF8       | 0.07664964 | 1.83898E-09 |
| MON2       | 0.04803008 | 1.84625E-09 |

|            |            |             |
|------------|------------|-------------|
| LINC01857  | 0.07732926 | 1.84996E-09 |
| DYNC1H1    | -0.1270679 | 1.87065E-09 |
| CEP250     | 0.0726881  | 1.87525E-09 |
| ICA1       | 0.02155981 | 1.88124E-09 |
| AC008105.3 | -0.0510084 | 1.88768E-09 |
| TRMU       | -0.0099396 | 1.88792E-09 |
| ORC5       | 0.0268323  | 1.88848E-09 |
| AMACR      | 0.03219787 | 1.89818E-09 |
| FUBP1      | 0.15704942 | 1.9302E-09  |
| FAM104B    | 0.04983433 | 1.95667E-09 |
| SNX4       | -0.0725604 | 1.97629E-09 |
| ZNF607     | 0.00907667 | 1.98472E-09 |
| HDAC4      | 0.02397054 | 1.99409E-09 |
| MECR       | 0.05708146 | 2.00426E-09 |
| AL161457.2 | 0.05973695 | 2.01623E-09 |
| ZNF16      | 0.04141775 | 2.02275E-09 |
| VPS4B      | 0.06049853 | 2.02379E-09 |
| DCLRE1C    | 0.00850487 | 2.04325E-09 |
| RHPN1      | -0.0549286 | 2.05543E-09 |
| HIST1H3D   | -0.1222862 | 2.05848E-09 |
| TMEM185B   | 0.03849374 | 2.06021E-09 |
| GPR135     | 0.06579383 | 2.06366E-09 |
| NT5DC3     | -0.1508852 | 2.07199E-09 |
| AC073389.1 | 0.02885998 | 2.09967E-09 |
| WDR60      | 0.13084768 | 2.10868E-09 |
| SUPT3H     | 0.02060163 | 2.11396E-09 |
| CFAP410    | 0.03207143 | 2.14721E-09 |
| SLC17A9    | -0.0318706 | 2.15272E-09 |
| MMP19      | -0.1793188 | 2.18485E-09 |
| ORAI3      | 0.03215636 | 2.19866E-09 |
| AEBP1      | 0.09210132 | 2.20606E-09 |
| FNDC3B     | 0.12262283 | 2.21371E-09 |
| PUSL1      | -0.0084881 | 2.21581E-09 |
| ACSL1      | -0.017086  | 2.2171E-09  |
| RXRβ       | 0.01131138 | 2.22667E-09 |
| IL17RA     | 0.0656212  | 2.23058E-09 |
| FAM215B    | 0.0160811  | 2.23502E-09 |
| NOL4L      | -0.0803801 | 2.23713E-09 |
| STX18-AS1  | 0.06908349 | 2.25186E-09 |
| TMEM39B    | 0.03128436 | 2.25629E-09 |
| DNAJC3-DT  | 0.08884069 | 2.26639E-09 |
| MDH2       | -0.0074329 | 2.27211E-09 |
| PROC       | -0.1269695 | 2.28627E-09 |
| AC024060.2 | 0.06764102 | 2.28889E-09 |
| LPCAT3     | -0.1264053 | 2.28906E-09 |
| PGD        | 0.12375492 | 2.28945E-09 |
| DCUN1D2    | 0.02361476 | 2.29258E-09 |
| ZNF571     | 0.00717592 | 2.30324E-09 |
| COG1       | -0.0413692 | 2.30711E-09 |
| CCDC59     | 0.08730533 | 2.31021E-09 |

|            |            |             |
|------------|------------|-------------|
| STYX       | 0.04719196 | 2.33456E-09 |
| C20orf194  | -0.0869285 | 2.34496E-09 |
| NDUFB5     | 0.19426571 | 2.34754E-09 |
| C8orf76    | -0.1011918 | 2.35536E-09 |
| SERPINA1   | 0.00926446 | 2.37282E-09 |
| KANK2      | -0.1416156 | 2.37725E-09 |
| NUS1       | -0.0073743 | 2.38774E-09 |
| THAP1      | -0.0151932 | 2.38947E-09 |
| STK17A     | 0.00236219 | 2.40555E-09 |
| NRDE2      | 0.10485363 | 2.42141E-09 |
| ZNF430     | -0.0583206 | 2.43143E-09 |
| AC103769.1 | 0.03614611 | 2.43278E-09 |
| ZHX1       | 0.06655301 | 2.4467E-09  |
| RPL5       | 0.14507684 | 2.45298E-09 |
| JMY        | 0.04801351 | 2.45884E-09 |
| GGH        | -0.0841198 | 2.46479E-09 |
| DDHD2      | 0.02461641 | 2.47158E-09 |
| OGFOD2     | 0.05065605 | 2.47487E-09 |
| GPATCH1    | 0.08381661 | 2.49521E-09 |
| LPIN2      | -0.0858461 | 2.51169E-09 |
| MARCH2     | -0.0267804 | 2.52074E-09 |
| EMC1       | 0.08842418 | 2.54574E-09 |
| ATP1A1-AS1 | 0.07356619 | 2.56736E-09 |
| SCFD2      | 0.05721422 | 2.56979E-09 |
| MAGEH1     | 0.05256137 | 2.58479E-09 |
| TMEM51     | -0.0763939 | 2.59228E-09 |
| HTT        | 0.01090295 | 2.6015E-09  |
| AC002464.1 | 0.04390102 | 2.60626E-09 |
| PALD1      | 0.0905863  | 2.62033E-09 |
| NRF1       | -0.0047203 | 2.66611E-09 |
| C6orf47    | -0.0885601 | 2.67427E-09 |
| NDUFS3     | 0.04926956 | 2.67594E-09 |
| PDE7A      | 0.04891697 | 2.68109E-09 |
| AATK       | -0.1336601 | 2.69269E-09 |
| AC008915.2 | 0.03596161 | 2.69721E-09 |
| AC159540.2 | 0.07982343 | 2.69797E-09 |
| GIPC1      | -0.0040562 | 2.71066E-09 |
| SETD6      | 0.05306447 | 2.7222E-09  |
| DISC1      | 0.06197085 | 2.74082E-09 |
| DHX29      | -0.0191065 | 2.75846E-09 |
| TRAF3IP3   | 0.02754032 | 2.75925E-09 |
| SPTBN1     | 0.00067561 | 2.77105E-09 |
| STK16      | -0.0137487 | 2.77503E-09 |
| SSH1       | -0.0530014 | 2.7772E-09  |
| REV1       | -0.0262373 | 2.7835E-09  |
| ZKSCAN4    | 0.04759285 | 2.8162E-09  |
| FBXW4      | -0.0201957 | 2.82001E-09 |
| TXN2       | -0.1023762 | 2.84418E-09 |
| LINC02591  | 0.03105015 | 2.84646E-09 |
| XRN2       | 0.16096848 | 2.86829E-09 |



|          |            |             |
|----------|------------|-------------|
| PLAGL2   | -0.0292745 | 2.88621E-09 |
| PGAP2    | 0.03470984 | 2.88628E-09 |
| APOL2    | 0.06401618 | 2.89067E-09 |
| CSNK2A1  | -0.0548048 | 2.89446E-09 |
| RNF14    | -0.0119343 | 2.89891E-09 |
| DOT1L    | -0.0874718 | 2.90781E-09 |
| ZNF100   | 0.09098723 | 2.9177E-09  |
| DHX34    | 0.01427906 | 2.92663E-09 |
| ZPR1     | 0.01323121 | 2.93371E-09 |
| SLC25A17 | 0.04608768 | 2.93413E-09 |
| ENTPD7   | -0.0239977 | 2.94864E-09 |
| MTERF4   | 0.16022993 | 2.99031E-09 |
| DSE      | -0.0240746 | 3.02139E-09 |
| PCYOX1L  | 0.05675372 | 3.03223E-09 |
| KLHL6    | -0.0034649 | 3.04665E-09 |
| PYCR1    | 0.05898014 | 3.05094E-09 |
| TRAF3IP2 | -0.0287853 | 3.0753E-09  |
| IQGAP2   | 0.16161276 | 3.07611E-09 |
| TTC33    | 0.02786985 | 3.08329E-09 |
| LIMD2    | -0.2450983 | 3.08494E-09 |
| ZDHHC17  | 0.03423753 | 3.098E-09   |
| VAR5     | 0.01010372 | 3.10212E-09 |
| C11orf74 | 0.11456618 | 3.10646E-09 |
| C7orf26  | 0.03626177 | 3.11087E-09 |
| PIK3CG   | -0.0326913 | 3.11481E-09 |
| PIK3R2   | 0.06153145 | 3.12088E-09 |
| CREBRF   | -0.1998729 | 3.13519E-09 |
| RMC1     | -0.0416644 | 3.15305E-09 |
| MAP2K6   | 0.05573166 | 3.16937E-09 |
| TMEM234  | -0.1198058 | 3.17482E-09 |
| OPRL1    | 0.02729866 | 3.19547E-09 |
| SATB1    | 0.12275212 | 3.19943E-09 |
| TTL      | -0.0158239 | 3.25511E-09 |
| SSBP2    | 0.04703346 | 3.27064E-09 |
| URGCP    | 0.03876734 | 3.29254E-09 |
| PBRM1    | 0.10266664 | 3.30295E-09 |
| ZNF286A  | 0.092406   | 3.33932E-09 |
| SVBP     | -0.0657926 | 3.34582E-09 |
| ABHD2    | 0.18646967 | 3.36003E-09 |
| MORC3    | -0.0267861 | 3.36212E-09 |
| CC2D1A   | -0.0022863 | 3.37101E-09 |
| PDE6G    | -0.0683541 | 3.39008E-09 |
| HACD4    | -0.01296   | 3.40079E-09 |
| TBL2     | -0.0897648 | 3.4047E-09  |
| UBTD2    | -0.0397656 | 3.4176E-09  |
| RPS25    | 0.15695868 | 3.46378E-09 |
| ZKSCAN1  | 0.11369752 | 3.48034E-09 |
| POP4     | -0.016571  | 3.49282E-09 |
| PRKCI    | 0.00525937 | 3.50405E-09 |
| AGAP9    | 0.03223829 | 3.55357E-09 |

|            |            |             |
|------------|------------|-------------|
| B4GALT5    | -0.049     | 3.55467E-09 |
| PANK3      | -0.006008  | 3.55903E-09 |
| AC012358.3 | 0.05724217 | 3.59703E-09 |
| PTRHD1     | 0.08291417 | 3.62801E-09 |
| LRRC37A2   | 0.04880603 | 3.6601E-09  |
| TMEM182    | 0.06350857 | 3.67332E-09 |
| MED7       | 0.02656106 | 3.69683E-09 |
| PFAS       | 0.05742409 | 3.70954E-09 |
| RPL26      | 0.13452538 | 3.73613E-09 |
| CHCHD1     | -0.0420621 | 3.74891E-09 |
| CNOT6L     | 0.03027436 | 3.74924E-09 |
| ANKRD50    | 0.08122555 | 3.76377E-09 |
| ZSCAN12    | 0.03838845 | 3.76596E-09 |
| BCL2L11    | 0.00122335 | 3.7683E-09  |
| BBIP1      | -0.0072184 | 3.77832E-09 |
| AZI2       | 0.08496104 | 3.78232E-09 |
| ITGA6-AS1  | 0.05664126 | 3.81747E-09 |
| LPP        | 0.04106214 | 3.82252E-09 |
| CCT7       | 0.16838356 | 3.85251E-09 |
| CARM1      | 0.04857367 | 3.86453E-09 |
| ITFG2-AS1  | 0.06361145 | 3.87044E-09 |
| MAST4      | -0.0459263 | 3.93994E-09 |
| CLUH       | 0.02537334 | 3.95596E-09 |
| C18orf21   | -0.041673  | 3.9598E-09  |
| AL049840.4 | -0.0551215 | 3.9712E-09  |
| ABCA7      | 0.03565122 | 3.97162E-09 |
| RREB1      | -0.0253515 | 3.98009E-09 |
| TAF5       | 0.0294184  | 4.0085E-09  |
| ANKS3      | 0.04635944 | 4.01223E-09 |
| GALNT10    | 0.0368517  | 4.02491E-09 |
| IFI35      | -0.0666246 | 4.07863E-09 |
| INPP5A     | 0.04687183 | 4.08983E-09 |
| MPND       | 0.04922063 | 4.10048E-09 |
| MMS19      | 0.00864729 | 4.10967E-09 |
| AC108134.3 | 0.035493   | 4.13919E-09 |
| ARMH3      | -0.0399339 | 4.15914E-09 |
| UTP11      | -0.0360294 | 4.23232E-09 |
| SBNO1      | 0.10104059 | 4.25553E-09 |
| ANO10      | 0.00013577 | 4.28827E-09 |
| ALDH18A1   | 0.06663336 | 4.29678E-09 |
| CDK5RAP3   | -0.0003852 | 4.34111E-09 |
| ATP6AP1L   | 0.04632001 | 4.34976E-09 |
| DEFB1      | 0.08728394 | 4.35128E-09 |
| MOB1B      | -0.1287161 | 4.35985E-09 |
| SDCBP2-AS  | 0.05677649 | 4.36972E-09 |
| ZNF280C    | 0.02506119 | 4.37484E-09 |
| STX16      | 0.00546424 | 4.41531E-09 |
| PICK1      | -0.0174949 | 4.42013E-09 |
| HDHD5      | 0.06400263 | 4.42687E-09 |
| ICMT       | 0.03778561 | 4.45884E-09 |

|            |            |             |
|------------|------------|-------------|
| ZSCAN9     | -0.00383   | 4.48811E-09 |
| RP9        | 0.01172345 | 4.51597E-09 |
| SAV1       | 0.04194371 | 4.52436E-09 |
| ZNF408     | -0.03931   | 4.59517E-09 |
| CCNB1IP1   | 0.10351497 | 4.62704E-09 |
| CAPZA1     | 0.02998118 | 4.62732E-09 |
| LYRM1      | -0.0264388 | 4.63164E-09 |
| ULK4       | -0.147712  | 4.63925E-09 |
| SWSAP1     | 0.06924603 | 4.64095E-09 |
| PPARGC1B   | 0.08424898 | 4.64603E-09 |
| VTA1       | -0.031085  | 4.65514E-09 |
| CIB1       | -0.0439506 | 4.74478E-09 |
| QPCTL      | 0.02870111 | 4.76186E-09 |
| CCDC88B    | -0.13296   | 4.82883E-09 |
| TTC4       | 0.04761943 | 4.83562E-09 |
| RNASEH1-A  | 0.0515903  | 4.8687E-09  |
| GTF2IRD2B  | 0.07535223 | 4.86929E-09 |
| PARPBP     | 0.01588557 | 4.8899E-09  |
| SLC2A13    | 0.05571845 | 4.9587E-09  |
| EIF4ENIF1  | -0.0180425 | 4.96758E-09 |
| ZNF10      | -0.001368  | 4.99591E-09 |
| ITGB2-AS1  | -0.1108631 | 5.00163E-09 |
| EP300      | 0.10280162 | 5.04664E-09 |
| FAM199X    | -0.008528  | 5.05511E-09 |
| ZNF709     | -0.0235377 | 5.05588E-09 |
| WIPF1      | 0.09252991 | 5.05685E-09 |
| SCLY       | 0.06169583 | 5.08693E-09 |
| G6PC3      | -0.1063423 | 5.11092E-09 |
| PFDN2      | -0.0887436 | 5.11498E-09 |
| AKAP17A    | -0.0638928 | 5.14253E-09 |
| PIK3R4     | -0.0623935 | 5.14881E-09 |
| AC067930.8 | 0.04237605 | 5.20957E-09 |
| AL133243.2 | -0.0799157 | 5.2572E-09  |
| ZSCAN21    | 0.0270575  | 5.29149E-09 |
| HACE1      | 0.04628764 | 5.31201E-09 |
| PGAM1      | 0.03951294 | 5.31313E-09 |
| CCDC169    | 0.08756687 | 5.35799E-09 |
| RBM25      | -0.275985  | 5.36946E-09 |
| PTBP3      | -0.0456768 | 5.39498E-09 |
| RAB5IF     | 0.14165712 | 5.44684E-09 |
| SEC16A     | 0.0305817  | 5.46321E-09 |
| XKR8       | -0.0822471 | 5.47837E-09 |
| PSMA2      | -0.0877486 | 5.48639E-09 |
| PDK1       | 0.02732759 | 5.51596E-09 |
| CEP83      | 0.11520155 | 5.52113E-09 |
| IFT80      | -0.0017181 | 5.53949E-09 |
| ZNF688     | -0.0750824 | 5.55007E-09 |
| PCBP2-OT1  | 0.04270907 | 5.57267E-09 |
| C2orf76    | 0.03777037 | 5.58298E-09 |
| ASH1L      | 0.05008754 | 5.59108E-09 |

|            |            |             |
|------------|------------|-------------|
| RYK        | 0.07708728 | 5.60607E-09 |
| CEP350     | -0.0646016 | 5.63413E-09 |
| MX2        | 0.05562712 | 5.65119E-09 |
| Z93930.2   | 0.05184165 | 5.65351E-09 |
| DDX19B     | -0.0404284 | 5.70267E-09 |
| STYXL1     | 0.04968189 | 5.73926E-09 |
| IFI27L1    | -0.0494016 | 5.76283E-09 |
| FAM229B    | -0.1073276 | 5.77438E-09 |
| PHF11      | 0.13546708 | 5.7773E-09  |
| GMEB1      | -0.0845674 | 5.8174E-09  |
| SBNO2      | -0.0678978 | 5.89212E-09 |
| TRMT44     | 0.05467356 | 5.92929E-09 |
| AC008764.8 | 0.05838391 | 5.94013E-09 |
| PPRC1      | -0.0407905 | 5.94499E-09 |
| TPK1       | -0.0348986 | 6.03893E-09 |
| PLD6       | 0.06335031 | 6.04094E-09 |
| SLC25A12   | -0.0276391 | 6.05307E-09 |
| PPHLN1     | -0.1270373 | 6.06633E-09 |
| RBM45      | 0.06543422 | 6.1183E-09  |
| PHF2       | 0.07657046 | 6.16822E-09 |
| MINDY3     | -0.0594077 | 6.25223E-09 |
| ZNF615     | 0.03570935 | 6.25432E-09 |
| DVL3       | 0.0786326  | 6.25532E-09 |
| GBP2       | -0.0734591 | 6.26377E-09 |
| HOXB-AS3   | -0.0255155 | 6.29941E-09 |
| ZNF580     | 0.00931284 | 6.37878E-09 |
| ABHD12     | 0.01565502 | 6.38475E-09 |
| ERAL1      | 0.02614154 | 6.42669E-09 |
| IGLL1      | 0.24432888 | 6.46217E-09 |
| ABCC1      | 0.06794285 | 6.57244E-09 |
| RCL1       | 0.01337525 | 6.63365E-09 |
| DGCR8      | 0.01547505 | 6.64404E-09 |
| SLC22A18   | -0.0763546 | 6.66853E-09 |
| TTC19      | 0.14240476 | 6.67063E-09 |
| AXIN1      | 0.00806783 | 6.70355E-09 |
| ZC3HC1     | -0.0335046 | 6.73446E-09 |
| U2AF1L4    | -0.0268594 | 6.75173E-09 |
| SLC5A6     | 0.04461305 | 6.75988E-09 |
| TLR9       | -0.0762323 | 6.76059E-09 |
| MIS12      | 0.03766785 | 6.78366E-09 |
| CLEC16A    | 0.06136945 | 6.8E-09     |
| TBC1D22A   | 0.05146458 | 6.89897E-09 |
| TRAPPC6B   | 0.0053904  | 6.90201E-09 |
| ZNF250     | 0.00872896 | 6.94253E-09 |
| ARHGAP23   | -0.1368461 | 6.95304E-09 |
| EML2       | 0.02882927 | 6.96755E-09 |
| EIF3C      | 0.06099674 | 7.01364E-09 |
| GOSR2      | -0.0066398 | 7.01747E-09 |
| FBXO30     | -0.1192435 | 7.04525E-09 |
| PARK7      | 0.14126032 | 7.04642E-09 |

|            |            |             |
|------------|------------|-------------|
| CTSH       | 0.14542314 | 7.091E-09   |
| SEPHS1     | 0.03331596 | 7.12537E-09 |
| RNF170     | 0.01436979 | 7.1612E-09  |
| PYCARD     | -0.189234  | 7.25268E-09 |
| MTERF3     | -0.0122584 | 7.26573E-09 |
| PSME3      | 0.00988321 | 7.30187E-09 |
| RPS6KB1    | -0.053406  | 7.34136E-09 |
| DDIT3      | -0.2462179 | 7.36195E-09 |
| WHAMM      | -0.0259818 | 7.40019E-09 |
| APOBEC3D   | 0.04893643 | 7.41359E-09 |
| CKMT2-AS1  | 0.07453854 | 7.42092E-09 |
| CMTM7      | -0.0352384 | 7.44953E-09 |
| MIATNB     | 0.05879871 | 7.48033E-09 |
| ATP5MC1    | 0.07804349 | 7.48897E-09 |
| NLRC3      | -0.1405595 | 7.54234E-09 |
| NOTCH2NL   | 0.04742587 | 7.56279E-09 |
| HIST1H1B   | -0.1581569 | 7.63291E-09 |
| MIER2      | -0.0579944 | 7.63985E-09 |
| SOCS1      | -0.2128901 | 7.64365E-09 |
| SLC16A5    | -0.0220703 | 7.67615E-09 |
| STARD9     | 0.0994421  | 7.72168E-09 |
| CHFR       | -0.0009221 | 7.73686E-09 |
| MFSD8      | -0.0145505 | 7.73711E-09 |
| MFSD11     | -0.0096486 | 7.76764E-09 |
| TRAK1      | -0.0676118 | 7.82375E-09 |
| LINC00641  | 0.0750522  | 7.85047E-09 |
| DDI2       | -0.0831925 | 7.85717E-09 |
| AC136944.2 | 0.05074645 | 7.87158E-09 |
| PLEKHO1    | -0.2503397 | 7.89425E-09 |
| SEC31B     | 0.04459022 | 7.89953E-09 |
| CANX       | 0.22092413 | 7.9135E-09  |
| AL138724.1 | -0.0482385 | 7.91427E-09 |
| FOXRED2    | 0.05036128 | 7.92464E-09 |
| CIAPIN1    | -0.0077033 | 7.93928E-09 |
| OSER1-DT   | 0.03711914 | 7.96312E-09 |
| IFRD1      | -0.0736266 | 7.97692E-09 |
| UBE4A      | 0.04210946 | 8.02296E-09 |
| DLAT       | 0.03181493 | 8.02528E-09 |
| Z97192.1   | 0.0528377  | 8.03413E-09 |
| CCDC130    | -0.0571755 | 8.0599E-09  |
| TAF13      | -0.0316345 | 8.10124E-09 |
| SUGP1      | 0.04967558 | 8.1823E-09  |
| MICOS13    | 0.17521623 | 8.20938E-09 |
| ORAI2      | 0.25487773 | 8.2885E-09  |
| PUS10      | 0.03335432 | 8.35787E-09 |
| BAX        | 0.14176949 | 8.39896E-09 |
| FEN1       | -0.0522028 | 8.43455E-09 |
| CCAR1      | -0.1088242 | 8.46559E-09 |
| ORC6       | -0.0460255 | 8.46772E-09 |
| C10orf95   | 0.07450029 | 8.47865E-09 |

|            |            |             |
|------------|------------|-------------|
| TNFAIP8L2  | -0.019801  | 8.50167E-09 |
| SLFN12     | 0.06739298 | 8.54314E-09 |
| VCPIP1     | 0.0127223  | 8.55926E-09 |
| CALCOCO2   | -0.0640653 | 8.56953E-09 |
| EFL1       | 0.06943124 | 8.5707E-09  |
| PIK3R1     | -0.13636   | 8.72888E-09 |
| RELCH      | -0.0120073 | 8.74454E-09 |
| RRAGB      | 0.03817542 | 8.76664E-09 |
| LINC00467  | 0.08535538 | 8.78869E-09 |
| GPM6B      | 0.0367376  | 8.8238E-09  |
| GTF2A1     | 0.07925119 | 8.84144E-09 |
| CCT3       | 0.16894637 | 8.90619E-09 |
| IL15RA     | -0.0136201 | 8.91252E-09 |
| LINS1      | 0.04943798 | 8.9454E-09  |
| CHUK       | 0.0123323  | 8.9496E-09  |
| LINC02615  | 0.02436003 | 9.05897E-09 |
| PTTG1      | -0.0406935 | 9.12936E-09 |
| WDR59      | 0.02412013 | 9.34511E-09 |
| MRPS36     | 0.10816051 | 9.39101E-09 |
| MAP3K13    | -0.044204  | 9.49416E-09 |
| MICAL3     | 0.03886821 | 9.50458E-09 |
| SAAL1      | 0.02808499 | 9.54859E-09 |
| CDC23      | 0.01524199 | 9.56848E-09 |
| PLXNA3     | -0.1854005 | 9.58162E-09 |
| HEXD-IT1   | 0.03458249 | 9.59623E-09 |
| MRM2       | -0.0213797 | 9.64691E-09 |
| MED9       | -0.0548521 | 9.69802E-09 |
| MFN2       | -0.0073792 | 9.74585E-09 |
| ZNF516     | -0.1237394 | 9.76787E-09 |
| MRI1       | 0.08484153 | 9.7999E-09  |
| FARS2      | -0.0264561 | 9.82172E-09 |
| SLC29A3    | 0.03295573 | 9.88386E-09 |
| RBM15      | -0.0048276 | 9.88494E-09 |
| FAM160A2   | -0.0370435 | 1.00084E-08 |
| ZNF671     | -0.0238678 | 1.00445E-08 |
| HLA-F-AS1  | 0.03975267 | 1.00629E-08 |
| ZNF418     | 0.01765661 | 1.02132E-08 |
| MED23      | -0.0300663 | 1.02367E-08 |
| ZNF568     | 0.07249971 | 1.04249E-08 |
| RCAN1      | 0.0450763  | 1.05361E-08 |
| AL589863.1 | 0.05358218 | 1.05944E-08 |
| RNF103     | -0.1027882 | 1.06171E-08 |
| MATK       | 0.05833341 | 1.06237E-08 |
| ZNF558     | 0.03505548 | 1.08126E-08 |
| UQCR11     | 0.19323267 | 1.08253E-08 |
| SLX4IP     | 0.0409128  | 1.08459E-08 |
| COPG2      | 0.08917126 | 1.0847E-08  |
| TBC1D23    | -0.0588853 | 1.09117E-08 |
| SMURF2     | -0.0549192 | 1.09147E-08 |
| SYNGR1     | -0.1573815 | 1.1029E-08  |

|            |            |             |
|------------|------------|-------------|
| DMTN       | 0.09525804 | 1.10976E-08 |
| CHSY1      | 0.09762966 | 1.11083E-08 |
| GOT1       | -0.0271326 | 1.11492E-08 |
| STK19      | -0.1095297 | 1.11703E-08 |
| ABHD14B    | -0.0247701 | 1.1235E-08  |
| GFPT1      | -0.0540739 | 1.1276E-08  |
| UBIAD1     | 0.04567412 | 1.12935E-08 |
| ZC3H10     | 0.04263923 | 1.13831E-08 |
| LACTB2     | 0.09724008 | 1.13929E-08 |
| JRK        | 0.0951225  | 1.13932E-08 |
| PTPN12     | -0.0278029 | 1.13941E-08 |
| ZSCAN26    | 0.06244518 | 1.1483E-08  |
| WDR54      | -0.149816  | 1.15041E-08 |
| DBR1       | 0.02519404 | 1.1547E-08  |
| FGFR1OP    | 0.03390641 | 1.15533E-08 |
| USP27X     | -0.1205699 | 1.16297E-08 |
| AGPAT1     | 0.02883451 | 1.16798E-08 |
| DHX16      | -0.0114041 | 1.16838E-08 |
| EDC3       | -0.0457528 | 1.16877E-08 |
| GTPBP3     | 0.0710595  | 1.16991E-08 |
| EIF3D      | -0.1971914 | 1.17047E-08 |
| PCBD1      | -0.0687776 | 1.18185E-08 |
| RPGRIP1L   | 0.05608093 | 1.18532E-08 |
| AOAH       | 0.04042427 | 1.18703E-08 |
| MAN2A1     | -0.0326319 | 1.18707E-08 |
| TSC22D2    | 0.01250064 | 1.19745E-08 |
| DNAJB2     | -0.0176975 | 1.20444E-08 |
| ZNF500     | 0.03757098 | 1.20572E-08 |
| KTN1-AS1   | 0.04787753 | 1.20799E-08 |
| CCDC47     | 0.03720876 | 1.22075E-08 |
| TBL3       | 0.04369489 | 1.23004E-08 |
| SIGLEC6    | 0.09278692 | 1.23334E-08 |
| ABCB10     | 0.06192029 | 1.23404E-08 |
| ISG20L2    | 0.09688776 | 1.23415E-08 |
| CASP9      | 0.01851519 | 1.25115E-08 |
| CNOT4      | 0.03514203 | 1.25492E-08 |
| ANKRD52    | 0.01232894 | 1.26553E-08 |
| FAIM       | 0.07354858 | 1.27584E-08 |
| AC064807.1 | 0.03592381 | 1.27933E-08 |
| SIRT1      | -0.0410679 | 1.27971E-08 |
| NONO       | 0.04075932 | 1.29439E-08 |
| CRYGD      | 0.04126348 | 1.3043E-08  |
| SETD9      | 0.04883236 | 1.305E-08   |
| PDE6B      | 0.07039065 | 1.3062E-08  |
| AC005726.1 | 0.05281314 | 1.31265E-08 |
| MICU2      | 0.06309258 | 1.32955E-08 |
| KIF27      | 0.08840428 | 1.33157E-08 |
| AC096992.2 | 0.04475131 | 1.333E-08   |
| TBC1D24    | 0.06541641 | 1.34144E-08 |
| LMNB2      | -0.044137  | 1.34236E-08 |

|            |            |             |
|------------|------------|-------------|
| TAP2       | 0.03617045 | 1.34722E-08 |
| BNIP1      | -0.0775462 | 1.34815E-08 |
| MSN        | -0.250401  | 1.35625E-08 |
| TOGARAM1   | -0.1041464 | 1.36049E-08 |
| ZNF782     | 0.05838722 | 1.36138E-08 |
| ZNF384     | 0.09077907 | 1.36487E-08 |
| MYD88      | 0.00808296 | 1.36491E-08 |
| PEX14      | -0.0228026 | 1.36926E-08 |
| AK3        | 0.05403502 | 1.37131E-08 |
| APLF       | 0.02463    | 1.3796E-08  |
| SLC9B2     | 0.05811337 | 1.38035E-08 |
| AC093690.1 | 0.06874286 | 1.38367E-08 |
| MTHFD2     | -0.1446731 | 1.38828E-08 |
| LONP1      | 0.03510862 | 1.40242E-08 |
| ADAMTS6    | 0.06585877 | 1.40824E-08 |
| BRI3       | 0.23409113 | 1.40975E-08 |
| UTRN       | 0.02426476 | 1.41018E-08 |
| JAK2       | 0.07097725 | 1.41641E-08 |
| SLMAP      | -0.1434846 | 1.41733E-08 |
| INSIG1     | -0.2123325 | 1.4238E-08  |
| AC004889.1 | -0.0385562 | 1.42429E-08 |
| XRCC4      | 0.08645546 | 1.42611E-08 |
| CCDC93     | -0.0580565 | 1.42782E-08 |
| CA2        | 0.12024108 | 1.43463E-08 |
| AC009961.4 | 0.0079576  | 1.43787E-08 |
| CDK8       | 0.05892553 | 1.45539E-08 |
| SPG7       | 0.00886438 | 1.46274E-08 |
| TIGAR      | 0.00496719 | 1.47022E-08 |
| YWHAB      | 0.22522606 | 1.4714E-08  |
| PHC1       | -0.0302968 | 1.48722E-08 |
| STX6       | 0.00012492 | 1.49122E-08 |
| POLL       | 0.01862677 | 1.49469E-08 |
| JADE1      | 0.07050069 | 1.49629E-08 |
| FKBP14     | 0.0771373  | 1.50309E-08 |
| ANKZF1     | 0.02197961 | 1.50444E-08 |
| AL080317.2 | 0.06958599 | 1.50755E-08 |
| PSMD4      | 0.13654607 | 1.51392E-08 |
| SMG8       | 0.04615172 | 1.53408E-08 |
| PRKAR2A    | -0.0573988 | 1.54098E-08 |
| ERI1       | -0.0426056 | 1.54405E-08 |
| PRELID1    | -0.2421798 | 1.54512E-08 |
| RIPK1      | 0.00496297 | 1.54675E-08 |
| MTMR10     | -0.0726787 | 1.56928E-08 |
| CEP295     | 0.07409439 | 1.56985E-08 |
| WDR5B      | 0.08476011 | 1.58052E-08 |
| ZNF254     | -0.0141815 | 1.60055E-08 |
| ITGA3      | -0.0852296 | 1.60352E-08 |
| RDH5       | 0.03513782 | 1.60565E-08 |
| ATF5       | -0.1204906 | 1.60964E-08 |
| AL592435.1 | 0.03507348 | 1.61605E-08 |



|            |            |             |
|------------|------------|-------------|
| ZNF780A    | 0.0549496  | 1.62604E-08 |
| RABL3      | -0.0911605 | 1.63952E-08 |
| DAB2       | 0.08585822 | 1.64768E-08 |
| DAZAP1     | -0.0447632 | 1.65709E-08 |
| DAGLB      | -0.0550907 | 1.65919E-08 |
| ARMH1      | -0.0605536 | 1.66562E-08 |
| AP000845.1 | 0.02689812 | 1.67365E-08 |
| KRI1       | 0.00454144 | 1.68268E-08 |
| GLMP       | 0.03266295 | 1.71148E-08 |
| EXOSC1     | -0.0315087 | 1.71255E-08 |
| ERG        | 0.16198772 | 1.73079E-08 |
| RSKR       | 0.05637949 | 1.73758E-08 |
| SLC9A6     | -0.0154348 | 1.76491E-08 |
| AGPAT3     | 0.03235038 | 1.76708E-08 |
| CCDC121    | 0.04713696 | 1.77287E-08 |
| ATG13      | -0.0367473 | 1.78528E-08 |
| TLK1       | 0.06059417 | 1.78906E-08 |
| TBC1D17    | 0.07376768 | 1.80375E-08 |
| ULK3       | -0.0466959 | 1.80966E-08 |
| AMD1       | -0.1700649 | 1.82569E-08 |
| MCPH1-AS1  | 0.04188431 | 1.84018E-08 |
| REV3L      | -0.1152182 | 1.84778E-08 |
| SCRIB      | 0.01781414 | 1.84793E-08 |
| PTRH1      | -0.0466567 | 1.85766E-08 |
| DNAJC2     | -0.0139551 | 1.87039E-08 |
| NADSYN1    | 0.05477731 | 1.88078E-08 |
| AC120053.1 | 0.08283088 | 1.8825E-08  |
| SLTM       | 0.28614699 | 1.89171E-08 |
| ZNF468     | -0.0017165 | 1.91266E-08 |
| EIF4G1     | 0.08886405 | 1.92257E-08 |
| ZC3HAV1    | -0.1267502 | 1.94147E-08 |
| TNS3       | -0.1011901 | 1.95215E-08 |
| UQCRH      | 0.16431135 | 1.9545E-08  |
| PLEK       | -0.2585944 | 1.95472E-08 |
| PILRB      | 0.01908632 | 1.9625E-08  |
| AL353807.5 | 0.05487095 | 1.96581E-08 |
| ZDHHC6     | 0.00061825 | 2.00584E-08 |
| TRIM14     | 0.04777058 | 2.0074E-08  |
| MZF1       | 0.02991674 | 2.01209E-08 |
| ARHGAP18   | 0.03044951 | 2.01889E-08 |
| IWS1       | -0.0394326 | 2.02699E-08 |
| C7orf31    | 0.04522828 | 2.02838E-08 |
| DLGAP1-AS  | -0.0522956 | 2.03068E-08 |
| COMMD3     | 0.09556524 | 2.06055E-08 |
| IRS2       | -0.0088647 | 2.06057E-08 |
| FAHD1      | 0.04670058 | 2.09814E-08 |
| SPART-AS1  | 0.0521266  | 2.10614E-08 |
| STON2      | -0.102122  | 2.11492E-08 |
| DHX30      | 0.02648722 | 2.11543E-08 |
| PLA2G15    | -0.1169179 | 2.13163E-08 |

|            |            |             |
|------------|------------|-------------|
| TBCC       | 0.08758257 | 2.13538E-08 |
| FAM120B    | 0.04413838 | 2.15229E-08 |
| SYTL2      | 0.05562829 | 2.16519E-08 |
| XYLT2      | 0.04885343 | 2.16608E-08 |
| MAGED2     | -0.0098573 | 2.17688E-08 |
| KDM4A-AS1  | 0.06419688 | 2.18239E-08 |
| FGFBP3     | 0.02622832 | 2.18565E-08 |
| TIMM21     | 0.07298605 | 2.18774E-08 |
| WDR49      | -0.1345466 | 2.19435E-08 |
| MPP1       | 0.1526182  | 2.20372E-08 |
| EXOSC4     | -0.0130328 | 2.21726E-08 |
| ABCE1      | 0.12930531 | 2.24262E-08 |
| TANGO2     | 0.00156752 | 2.26539E-08 |
| GADD45A    | -0.0670042 | 2.28826E-08 |
| UBE4B      | 0.06885207 | 2.29197E-08 |
| C5orf30    | -0.0581586 | 2.2969E-08  |
| TFDP2      | 0.06884708 | 2.32169E-08 |
| DPP8       | -0.017103  | 2.3251E-08  |
| MPI        | 0.03806135 | 2.33014E-08 |
| ZBTB4      | -0.0645967 | 2.33191E-08 |
| CUL2       | -0.0466442 | 2.33216E-08 |
| AC016727.1 | 0.01672067 | 2.33629E-08 |
| RELA-DT    | 0.03361594 | 2.35316E-08 |
| CHD9       | 0.12511414 | 2.356E-08   |
| DNAL4      | -0.0548425 | 2.36237E-08 |
| GTPBP1     | -0.0747811 | 2.37684E-08 |
| MAPK3      | -0.0717606 | 2.37957E-08 |
| ALG1       | 0.0414322  | 2.37996E-08 |
| LINC02035  | 0.03677105 | 2.38151E-08 |
| RAB4A      | 0.05633876 | 2.38708E-08 |
| CCDC51     | -0.0091238 | 2.39862E-08 |
| SYS1       | -0.0355754 | 2.41202E-08 |
| GOLGA2     | -0.0111088 | 2.42193E-08 |
| ARFIP1     | 0.04461138 | 2.44332E-08 |
| SPPL2B     | -0.0736321 | 2.44459E-08 |
| JAG1       | -0.1281558 | 2.45323E-08 |
| DECR1      | -0.0387713 | 2.46889E-08 |
| SPI1       | -0.1611108 | 2.4741E-08  |
| ZFP91      | -0.0835233 | 2.47899E-08 |
| PWP1       | 0.02578225 | 2.48114E-08 |
| DDT        | -0.2016472 | 2.48633E-08 |
| TMEM205    | -0.1710406 | 2.5027E-08  |
| KCTD5      | 0.00101068 | 2.50564E-08 |
| CPSF1      | 0.04348934 | 2.50726E-08 |
| CLN3       | 0.01948496 | 2.51328E-08 |
| GK5        | 0.11563059 | 2.51493E-08 |
| BTN3A3     | 0.05555376 | 2.53454E-08 |
| UNK        | -0.0517443 | 2.56999E-08 |
| PCGF6      | 0.06462398 | 2.57559E-08 |
| HOXA10     | 0.11360561 | 2.58747E-08 |

|            |            |             |
|------------|------------|-------------|
| WDR55      | -0.0183147 | 2.59822E-08 |
| HMCE5      | -0.1197087 | 2.61993E-08 |
| ASB7       | -0.0198472 | 2.62019E-08 |
| ASNSD1     | 0.06459293 | 2.62369E-08 |
| A1BG-AS1   | -0.0335517 | 2.63615E-08 |
| CALHM6     | 0.2174475  | 2.64414E-08 |
| ADHFE1     | 0.05090423 | 2.65192E-08 |
| ENC1       | 0.04840255 | 2.65646E-08 |
| RNASET2    | -0.1323929 | 2.66071E-08 |
| ZNF316     | -0.0478191 | 2.66311E-08 |
| PELO       | -0.0498331 | 2.66465E-08 |
| PIP5K1C    | -0.0133721 | 2.66835E-08 |
| TRMT11     | 0.01977522 | 2.67514E-08 |
| AC055822.1 | 0.05030585 | 2.68001E-08 |
| EEF2KMT    | 0.07918785 | 2.68302E-08 |
| RAVER2     | 0.04303441 | 2.68656E-08 |
| GTF2H4     | -0.0074441 | 2.68783E-08 |
| EXOG       | 0.04539018 | 2.71483E-08 |
| ZNF283     | 0.05163464 | 2.72389E-08 |
| PKIG       | 0.0291612  | 2.73162E-08 |
| ZMYM5      | -0.0790351 | 2.7337E-08  |
| RAD21      | -0.1076211 | 2.73498E-08 |
| CIAO3      | -0.0034905 | 2.74549E-08 |
| C21orf58   | 0.09891457 | 2.75043E-08 |
| FGD3       | 0.01774476 | 2.76058E-08 |
| CATSPERG   | 0.07534752 | 2.76096E-08 |
| RFC3       | 0.00475131 | 2.76368E-08 |
| AHRR       | 0.05579528 | 2.76669E-08 |
| CREBL2     | 0.01978095 | 2.7738E-08  |
| CARS       | -0.1350298 | 2.77536E-08 |
| MIR99AHG   | 0.07363423 | 2.77615E-08 |
| AKAP10     | 0.05280075 | 2.77927E-08 |
| FOXP1-IT1  | 0.00592427 | 2.79018E-08 |
| DDX51      | 0.0729799  | 2.80257E-08 |
| HERC5      | 0.04863021 | 2.80546E-08 |
| RAD1       | 0.00171397 | 2.82124E-08 |
| COMTD1     | -0.1051261 | 2.82975E-08 |
| HCK        | -0.0364384 | 2.8871E-08  |
| DANCR      | 0.14377591 | 2.903E-08   |
| MSH6       | -0.0261566 | 2.91425E-08 |
| GIMAP6     | -0.1394484 | 2.92499E-08 |
| ABI3       | -0.1042179 | 2.92747E-08 |
| LINC01678  | 0.07926203 | 2.92872E-08 |
| MAP4K3     | -0.0286544 | 2.93732E-08 |
| IRGQ       | -0.1080085 | 2.94171E-08 |
| COX10      | 0.00869285 | 2.9638E-08  |
| MAFG       | 0.00256366 | 2.96454E-08 |
| ZFH2-AS1   | 0.01730339 | 2.97247E-08 |
| AC092821.3 | 0.03439399 | 2.98839E-08 |
| MYO19      | 0.03182484 | 2.99605E-08 |

|            |            |             |
|------------|------------|-------------|
| VGLL4      | -0.1421311 | 3.00089E-08 |
| ZNF451     | -0.0429841 | 3.0241E-08  |
| NUDT2      | 0.02741792 | 3.0359E-08  |
| SNW1       | -0.1618097 | 3.03854E-08 |
| MED28      | 0.08356549 | 3.06306E-08 |
| OXSRI      | -0.0429929 | 3.06805E-08 |
| DUS3L      | -0.0396375 | 3.11585E-08 |
| INPP4B     | 0.11299219 | 3.11697E-08 |
| FAM221A    | 0.06318918 | 3.1675E-08  |
| NDUFA2     | 0.16809465 | 3.19822E-08 |
| EIPR1      | 0.04569058 | 3.20566E-08 |
| FEZ2       | -0.0166081 | 3.23087E-08 |
| BDP1       | -0.0126487 | 3.23497E-08 |
| BBC3       | -0.1208199 | 3.24236E-08 |
| DPH6       | 0.05142752 | 3.2743E-08  |
| OGT        | -0.1531346 | 3.27703E-08 |
| UBE2D4     | 0.06219294 | 3.31896E-08 |
| TCF20      | 0.05768605 | 3.33935E-08 |
| FAM3A      | -0.0337834 | 3.37389E-08 |
| UFL1       | -0.0907933 | 3.40471E-08 |
| DEPDC5     | 0.05756156 | 3.431E-08   |
| ZC3H3      | -0.018561  | 3.43226E-08 |
| AP006621.3 | 0.038414   | 3.44387E-08 |
| TOMM34     | -0.0245346 | 3.46017E-08 |
| IGBP1      | -0.0217877 | 3.46133E-08 |
| NCOR1      | 0.12610159 | 3.47148E-08 |
| HNRNPA3    | -0.2648412 | 3.49689E-08 |
| MTO1       | 0.05317936 | 3.49922E-08 |
| SLC35A5    | 0.04174753 | 3.51696E-08 |
| CSNK1G1    | -0.0745712 | 3.56078E-08 |
| ARL14EP    | 0.07264976 | 3.57961E-08 |
| UFM1       | 0.11956708 | 3.60159E-08 |
| CABLES1    | 0.06993711 | 3.62305E-08 |
| PHLPP1     | 0.00054605 | 3.64324E-08 |
| MED25      | -0.1561471 | 3.64348E-08 |
| POU2F1     | -0.0935796 | 3.64769E-08 |
| CNNM2      | 0.0751271  | 3.68346E-08 |
| LINC02384  | -0.0780248 | 3.68844E-08 |
| IGFBP7     | 0.10146882 | 3.71284E-08 |
| NDUFB7     | -0.0039054 | 3.71504E-08 |
| TBRG1      | 0.01289849 | 3.71927E-08 |
| RAB21      | -0.0757731 | 3.72645E-08 |
| CENPF      | 0.06286579 | 3.7792E-08  |
| UQCRC2     | 0.04318682 | 3.79093E-08 |
| RPTOR      | 0.02195741 | 3.80242E-08 |
| DES1       | -0.015273  | 3.81214E-08 |
| TMEM243    | -0.0460253 | 3.83832E-08 |
| RAC2       | -0.2331062 | 3.90688E-08 |
| RHBDD3     | 0.01870038 | 4.01206E-08 |
| AMMECR1L   | -0.039452  | 4.03668E-08 |

|            |            |             |
|------------|------------|-------------|
| AL590764.1 | 0.02360281 | 4.05821E-08 |
| TOMM40L    | -0.0666719 | 4.05967E-08 |
| B4GALT4    | 0.00348608 | 4.06044E-08 |
| SLC25A20   | 0.05339332 | 4.1014E-08  |
| MRPS21     | 0.13845173 | 4.11078E-08 |
| STAG1      | 0.08550788 | 4.11714E-08 |
| NEDD4      | 0.0515436  | 4.12423E-08 |
| SMAD2      | -0.0097524 | 4.14672E-08 |
| CARMIL2    | -0.0117389 | 4.1492E-08  |
| CIPC       | 0.01101032 | 4.18496E-08 |
| GALK2      | 0.11480003 | 4.23272E-08 |
| ABCA5      | 0.06038467 | 4.25697E-08 |
| CCSER2     | -0.0059524 | 4.31941E-08 |
| MEIS1-AS2  | -0.042807  | 4.36944E-08 |
| AMFR       | 0.00188335 | 4.39172E-08 |
| SMAD6      | 0.04803529 | 4.39872E-08 |
| USP37      | -0.0633457 | 4.39876E-08 |
| ZNF134     | 0.00408583 | 4.41371E-08 |
| SNHG12     | 0.10755098 | 4.41859E-08 |
| TGDS       | 0.00877269 | 4.42868E-08 |
| PLXND1     | 0.04201737 | 4.44939E-08 |
| CBY1       | -0.0579495 | 4.47998E-08 |
| TMEM214    | 0.02513911 | 4.49941E-08 |
| PGK1       | -0.2019455 | 4.54838E-08 |
| MIR155HG   | -0.0093244 | 4.6421E-08  |
| MLLT10     | 0.1056644  | 4.65516E-08 |
| TRIM68     | 0.05137465 | 4.66769E-08 |
| SREBF2     | 0.00420351 | 4.67053E-08 |
| AL645568.1 | 0.03881101 | 4.67393E-08 |
| PHB2       | -0.1267104 | 4.69821E-08 |
| ARL8B      | -0.0441999 | 4.71075E-08 |
| ENTPD5     | 0.04635711 | 4.72632E-08 |
| HUS1       | -0.0126676 | 4.73434E-08 |
| AC010623.1 | 0.02477397 | 4.73664E-08 |
| SNX14      | 0.04181321 | 4.85509E-08 |
| EIF5A      | -0.1722358 | 4.87818E-08 |
| PPARA      | 0.04323382 | 4.9164E-08  |
| ZBTB34     | -0.0728491 | 4.96668E-08 |
| MDM4       | 0.1358191  | 4.97116E-08 |
| ZNF496     | 0.03550976 | 4.98848E-08 |
| MED11      | 0.01479263 | 4.98878E-08 |
| NBN        | 0.0171145  | 5.03357E-08 |
| PHOSPHO2   | -0.0144924 | 5.05873E-08 |
| TIMM22     | -0.0717791 | 5.10221E-08 |
| ODF2       | 0.0571239  | 5.10355E-08 |
| DDX58      | 0.0888529  | 5.13423E-08 |
| PHF20L1    | 0.02383434 | 5.14481E-08 |
| FAM200A    | 0.03543611 | 5.20063E-08 |
| RFX1       | -0.0904127 | 5.2482E-08  |
| MRPL20-AS  | -0.0411326 | 5.28571E-08 |

|            |            |             |
|------------|------------|-------------|
| IRF8       | -0.2401729 | 5.32754E-08 |
| LINC02352  | 0.06494515 | 5.33229E-08 |
| INPP5F     | -0.0256772 | 5.45387E-08 |
| B3GALT4    | -0.1535138 | 5.45427E-08 |
| ZNF420     | 0.03016515 | 5.45808E-08 |
| NMNAT1     | 0.04644429 | 5.49085E-08 |
| XRCC5      | 0.19229449 | 5.49526E-08 |
| ATP13A1    | 0.0038676  | 5.52201E-08 |
| PPIP5K1    | 0.06871399 | 5.53574E-08 |
| TXNL4A     | -0.0025869 | 5.53976E-08 |
| KAT2A      | -0.0102567 | 5.54197E-08 |
| TXNL1      | -0.0123415 | 5.55272E-08 |
| BCL9L      | -0.0936688 | 5.56172E-08 |
| KANSL3     | -0.0946907 | 5.56213E-08 |
| SEC11C     | -0.0255063 | 5.56234E-08 |
| SOCS2      | 0.05015496 | 5.62316E-08 |
| KLHL11     | 0.03886073 | 5.63901E-08 |
| NGLY1      | 0.03610875 | 5.77369E-08 |
| SMG1       | 0.20448112 | 5.78633E-08 |
| SCYL3      | 0.03048723 | 5.79098E-08 |
| ST7L       | 0.06857667 | 5.82259E-08 |
| ZMYM2      | 0.06657936 | 5.8394E-08  |
| TMEM44-AS  | 0.02745629 | 5.86444E-08 |
| E2F5       | -0.0447551 | 5.87241E-08 |
| TMEM181    | 0.04955318 | 5.93079E-08 |
| SLC27A1    | 0.01566302 | 5.93216E-08 |
| AC135050.6 | -0.0009925 | 5.96864E-08 |
| EPB41L2    | 0.09896255 | 5.97714E-08 |
| LRRC42     | -0.1004598 | 5.99491E-08 |
| VEGFA      | -0.1304275 | 6.00655E-08 |
| PIP5K1B    | 0.0511682  | 6.044E-08   |
| ARAP1      | 0.0530799  | 6.06461E-08 |
| IRF7       | -0.0358769 | 6.09242E-08 |
| IQCG       | 0.01565594 | 6.13359E-08 |
| HIRA       | 0.03076813 | 6.13751E-08 |
| DDX24      | -0.1890944 | 6.23377E-08 |
| GTF2E1     | -0.0445435 | 6.24708E-08 |
| SLC15A4    | -0.1003948 | 6.29412E-08 |
| DHRS12     | -0.0705675 | 6.30536E-08 |
| CASP4      | 0.20761657 | 6.30894E-08 |
| BCORL1     | 0.01977078 | 6.32527E-08 |
| AFG1L      | 0.04916114 | 6.34235E-08 |
| CASP6      | 0.16115441 | 6.34438E-08 |
| SFXN2      | 0.05646098 | 6.36975E-08 |
| KCTD6      | -0.0526242 | 6.37039E-08 |
| ZFAND3     | 0.04967646 | 6.50624E-08 |
| AC124248.1 | 0.0716488  | 6.50993E-08 |
| AL360012.1 | 0.03475592 | 6.52663E-08 |
| CRAMP1     | 0.04448312 | 6.53593E-08 |
| MUTYH      | 0.00247185 | 6.59785E-08 |

|            |            |             |
|------------|------------|-------------|
| DACH1      | 0.07826472 | 6.61389E-08 |
| KIF1B      | -0.1020623 | 6.64129E-08 |
| CNTLN      | 0.05008287 | 6.67843E-08 |
| WDR25      | 0.02429937 | 6.70655E-08 |
| AL353622.1 | 0.04671063 | 6.73378E-08 |
| CDIP1      | -0.0107908 | 6.73567E-08 |
| NDUFB8     | -0.1510803 | 6.75719E-08 |
| PPP1R3F    | -0.0076903 | 6.78634E-08 |
| PTPN23     | 0.0103371  | 6.87415E-08 |
| PRKRA      | -0.0115233 | 6.89466E-08 |
| ZRSR2      | 0.04642826 | 6.89698E-08 |
| THOP1      | -0.0413016 | 6.90925E-08 |
| SLFN11     | 0.07756231 | 6.93566E-08 |
| ARAP2      | 0.01146758 | 6.94732E-08 |
| SS18L1     | -0.0106223 | 6.96681E-08 |
| ABO        | 0.10645116 | 6.98703E-08 |
| COQ10A     | 0.05102424 | 7.00163E-08 |
| TRIM16     | 0.06187572 | 7.10861E-08 |
| MTMR3      | 0.01875334 | 7.11774E-08 |
| SLC25A24   | -0.0186286 | 7.1259E-08  |
| CALCRL     | -0.2265355 | 7.18736E-08 |
| CERS6      | 0.06308085 | 7.23357E-08 |
| PPP3CC     | -0.0873331 | 7.23602E-08 |
| STAT5B     | 0.06017886 | 7.27271E-08 |
| ATAT1      | 0.01054483 | 7.37441E-08 |
| RNF139     | -0.0239185 | 7.46062E-08 |
| ZBTB8A     | -0.1921626 | 7.47491E-08 |
| BCDIN3D    | 0.03396839 | 7.5518E-08  |
| ZNF140     | -0.0340025 | 7.71479E-08 |
| BRK1       | -0.2148994 | 7.76065E-08 |
| DRAM1      | -0.0827957 | 7.76073E-08 |
| CISH       | -0.0908626 | 7.78766E-08 |
| DNAJC14    | 0.0250532  | 7.82134E-08 |
| NCEH1      | 0.04559732 | 7.8907E-08  |
| CDV3       | 0.17402107 | 7.98079E-08 |
| SRRD       | -0.0037511 | 8.01678E-08 |
| AL049840.2 | -0.0747658 | 8.02486E-08 |
| REXO1      | -0.0864068 | 8.03982E-08 |
| PRADC1     | 0.03596321 | 8.0481E-08  |
| NDUFAF7    | 0.04910252 | 8.07541E-08 |
| ZNF382     | 0.04080232 | 8.12807E-08 |
| C6orf136   | -0.0182912 | 8.20317E-08 |
| TPT1       | 0.13079169 | 8.24744E-08 |
| FRS2       | -0.0097916 | 8.2704E-08  |
| ATL3       | 0.04231638 | 8.28636E-08 |
| DAPP1      | -0.1465515 | 8.29764E-08 |
| MTFMT      | 0.05379045 | 8.33819E-08 |
| ZNF836     | -0.025868  | 8.38685E-08 |
| WBP4       | -0.1273605 | 8.3942E-08  |
| HIP1       | -0.1631541 | 8.41594E-08 |

|            |            |             |
|------------|------------|-------------|
| CMTR2      | 0.00355992 | 8.42528E-08 |
| TMF1       | -0.1026566 | 8.44587E-08 |
| SKIV2L     | 0.01073426 | 8.46776E-08 |
| SNX12      | -0.004605  | 8.50052E-08 |
| UNC119B    | -0.0546313 | 8.51309E-08 |
| MAP2K1     | 0.01094351 | 8.59495E-08 |
| GGCX       | 0.07318337 | 8.59879E-08 |
| LIN37      | -0.0491227 | 8.64487E-08 |
| E4F1       | -0.0675691 | 8.68652E-08 |
| PRIM1      | 0.01930856 | 8.77898E-08 |
| ATAD5      | 0.06152062 | 8.81155E-08 |
| ZNF595     | 0.03083825 | 8.85119E-08 |
| MTHFD2L    | 0.01220634 | 8.88666E-08 |
| AC007406.5 | 0.05355808 | 8.88869E-08 |
| ZNF334     | 0.00946157 | 8.8979E-08  |
| ZSCAN16    | -0.0677533 | 8.9239E-08  |
| SLC38A5    | 0.012351   | 9.06088E-08 |
| CPEB4      | 0.09584015 | 9.1217E-08  |
| CTNNA1     | 0.07234779 | 9.22612E-08 |
| DENND1C    | 0.00376772 | 9.23913E-08 |
| ARHGAP32   | 0.05359377 | 9.25822E-08 |
| METR1      | 0.05828417 | 9.31388E-08 |
| RNF208     | 0.0447359  | 9.32047E-08 |
| ZNF131     | 0.03580292 | 9.36098E-08 |
| NOP16      | 0.11402067 | 9.38975E-08 |
| CNDP2      | -0.0590662 | 9.42168E-08 |
| IL3RA      | 0.08020842 | 9.43346E-08 |
| AC110769.2 | 0.03827759 | 9.47014E-08 |
| NOMO3      | 0.01719491 | 9.50552E-08 |
| PSME4      | -0.1354615 | 9.51002E-08 |
| STARD4     | -0.0193152 | 9.52755E-08 |
| MAP3K20    | -0.0163657 | 9.5643E-08  |
| HOXB6      | -0.0700508 | 9.60383E-08 |
| TCTEX1D2   | -0.0038627 | 9.63373E-08 |
| AC093627.5 | 0.0527525  | 9.65321E-08 |
| TRMT112    | 0.11164629 | 9.81785E-08 |
| ZNF445     | 0.11024279 | 9.87356E-08 |
| C1RL-AS1   | -0.0132192 | 9.96233E-08 |
| FAM168A    | -0.0097979 | 9.99573E-08 |
| MARCH8     | -0.0674878 | 1.00054E-07 |
| AC005838.2 | 0.03221504 | 1.00357E-07 |
| PAQR6      | -0.0189905 | 1.01836E-07 |
| UAP1L1     | 0.01846268 | 1.03481E-07 |
| KSR1       | -0.1495875 | 1.03925E-07 |
| RGS10      | 0.2760998  | 1.04064E-07 |
| FDFT1      | -0.0470128 | 1.04961E-07 |
| ZNF330     | -0.00636   | 1.05182E-07 |
| RPUSD1     | 0.05654684 | 1.05434E-07 |
| DAD1       | 0.05173359 | 1.05965E-07 |
| GPR160     | 0.05358523 | 1.06859E-07 |



|            |            |             |
|------------|------------|-------------|
| PRPF3      | 0.07307304 | 1.07586E-07 |
| TADA1      | 0.01758558 | 1.07634E-07 |
| ZDHHC12    | -0.0372031 | 1.07732E-07 |
| MMUT       | 0.02229249 | 1.08134E-07 |
| BST1       | -0.0912529 | 1.08241E-07 |
| MAU2       | 0.04894492 | 1.08526E-07 |
| DIS3L2     | 0.00572265 | 1.08582E-07 |
| AC124016.2 | 0.04362203 | 1.09351E-07 |
| SRD5A3     | 0.15847473 | 1.09703E-07 |
| FAM193A    | -0.0429564 | 1.09828E-07 |
| PLSCR3     | 0.00111943 | 1.10634E-07 |
| STBD1      | -0.0962271 | 1.1116E-07  |
| SCYL2      | 0.00214479 | 1.11693E-07 |
| AC245884.8 | 0.03707198 | 1.11973E-07 |
| RCAN3      | -0.1247323 | 1.12859E-07 |
| DPH3       | -0.0638605 | 1.13599E-07 |
| WARS2      | -0.0329621 | 1.14444E-07 |
| B4GALT3    | -0.0697049 | 1.1486E-07  |
| HSD17B11   | 0.15610913 | 1.14898E-07 |
| TRMO       | -0.0410071 | 1.1492E-07  |
| ABHD15     | -0.0282067 | 1.15942E-07 |
| MMS22L     | 0.09593494 | 1.16505E-07 |
| NOP9       | 0.00333724 | 1.17023E-07 |
| TP53BP1    | 0.13210933 | 1.17307E-07 |
| AC008875.3 | -0.027038  | 1.17453E-07 |
| BTG3       | -0.0774409 | 1.18306E-07 |
| RNASEH2C   | 0.05792523 | 1.18473E-07 |
| BSG        | -0.0328632 | 1.19647E-07 |
| HS1BP3     | -0.0429449 | 1.19866E-07 |
| UQCRQ      | 0.16683637 | 1.20364E-07 |
| INO80E     | 0.00725755 | 1.20417E-07 |
| THRIL      | 0.03879299 | 1.20677E-07 |
| KLHL42     | 0.04050112 | 1.20679E-07 |
| CCT8       | 0.13781266 | 1.21197E-07 |
| WAS        | 0.00541622 | 1.21238E-07 |
| RBMX2      | 0.04482436 | 1.2143E-07  |
| LAPTM4A    | 0.00654336 | 1.22455E-07 |
| KIAA1841   | -0.1255669 | 1.22569E-07 |
| AC007336.1 | 0.08319649 | 1.23159E-07 |
| SLC22A5    | 0.03688168 | 1.23168E-07 |
| FCHO2      | 0.0290637  | 1.23964E-07 |
| RETSAT     | 0.02313401 | 1.25072E-07 |
| METTL26    | -0.0240739 | 1.25258E-07 |
| GMDS       | -0.0101252 | 1.25286E-07 |
| BSCL2      | 0.00706357 | 1.26009E-07 |
| TMEM187    | 0.02707061 | 1.26487E-07 |
| FASN       | 0.07099633 | 1.26627E-07 |
| TTI2       | 0.01944741 | 1.26736E-07 |
| TOM1       | -0.0161633 | 1.27159E-07 |
| PIK3R6     | -0.0240894 | 1.27758E-07 |

|            |            |             |
|------------|------------|-------------|
| AC092171.3 | 0.03550154 | 1.28122E-07 |
| EBLN2      | -0.021202  | 1.28435E-07 |
| CRY2       | -0.0468967 | 1.28642E-07 |
| AC018521.5 | -0.0227322 | 1.29546E-07 |
| KHDC4      | 0.1030954  | 1.29766E-07 |
| ZNF398     | -0.0201555 | 1.31038E-07 |
| ALDH16A1   | -0.0530119 | 1.31536E-07 |
| ICK        | 0.0651811  | 1.31545E-07 |
| STRN       | 0.00793272 | 1.31758E-07 |
| GMEB2      | -0.1137349 | 1.31829E-07 |
| THG1L      | 0.02713254 | 1.32581E-07 |
| RPS6KA3    | -0.0180213 | 1.33216E-07 |
| APC        | -0.0922743 | 1.33385E-07 |
| IFI30      | -0.1993573 | 1.33445E-07 |
| PI4K2B     | -0.050691  | 1.33764E-07 |
| PHGDH      | -0.1344594 | 1.33812E-07 |
| KLHL28     | -0.0834825 | 1.34078E-07 |
| NMRK1      | 0.03246923 | 1.35834E-07 |
| AL031595.2 | 0.03800854 | 1.36172E-07 |
| TMEM14A    | 0.04269389 | 1.37324E-07 |
| AC087473.1 | 0.06083637 | 1.39431E-07 |
| RBM7       | -0.0279075 | 1.40107E-07 |
| CEP19      | 0.04970279 | 1.40333E-07 |
| WARS       | -0.0940334 | 1.41183E-07 |
| LRR1       | 0.0202345  | 1.42123E-07 |
| ASCC3      | 0.04986311 | 1.42168E-07 |
| ZNF107     | 0.10084389 | 1.42761E-07 |
| UTP25      | 0.07228731 | 1.43244E-07 |
| FBF1       | 0.01721076 | 1.43685E-07 |
| STK35      | -0.0799667 | 1.43845E-07 |
| CLASRP     | -0.0056328 | 1.44627E-07 |
| CD79A      | -0.1076138 | 1.44951E-07 |
| ENY2       | -0.0891965 | 1.45489E-07 |
| MED14      | 0.01029205 | 1.46263E-07 |
| ARL6IP5    | 0.23409071 | 1.47419E-07 |
| RFX3       | 0.04944445 | 1.48055E-07 |
| AL590652.1 | 0.04750319 | 1.49319E-07 |
| SNX11      | 0.01614629 | 1.51612E-07 |
| TRAK2      | 0.01745711 | 1.52608E-07 |
| DENR       | 0.1470734  | 1.52962E-07 |
| AKAP9      | 0.38039752 | 1.53079E-07 |
| DDHD1      | -0.0531475 | 1.53473E-07 |
| SNX24      | 0.03946531 | 1.54281E-07 |
| RAB13      | -0.0843711 | 1.5441E-07  |
| IKZF5      | -0.053122  | 1.55673E-07 |
| ATRIP      | 0.02137036 | 1.56332E-07 |
| AGAP2      | -0.0534631 | 1.57369E-07 |
| SPCS2      | 0.02996015 | 1.57581E-07 |
| AL451085.2 | 0.01039663 | 1.60516E-07 |
| GCLM       | 0.03404837 | 1.60994E-07 |

|            |            |             |
|------------|------------|-------------|
| NORAD      | 0.1251643  | 1.63697E-07 |
| PCCA       | 0.0326307  | 1.6411E-07  |
| ZNF284     | 0.04770568 | 1.64887E-07 |
| NEK3       | 0.02058122 | 1.65034E-07 |
| PDE1B      | 0.01508109 | 1.65936E-07 |
| CHCHD10    | 0.18346064 | 1.66353E-07 |
| RAB11FIP3  | 0.03023967 | 1.66416E-07 |
| DUS4L      | 0.03481371 | 1.66458E-07 |
| SYNGAP1    | -0.0707934 | 1.68079E-07 |
| BTF3L4     | 0.04413664 | 1.68877E-07 |
| POC1B-AS1  | 0.06054067 | 1.71655E-07 |
| RBBP9      | 0.05499633 | 1.72667E-07 |
| UTP15      | -0.0025401 | 1.73002E-07 |
| MED18      | 0.00016559 | 1.75086E-07 |
| ZGPAT      | 3.8908E-05 | 1.75511E-07 |
| ACTR3C     | 0.04782763 | 1.76147E-07 |
| APH1B      | -0.0392292 | 1.7638E-07  |
| HMGXB3     | 0.03059641 | 1.78066E-07 |
| LINC00893  | -0.028129  | 1.78452E-07 |
| ZFYVE1     | -0.0005746 | 1.80103E-07 |
| BANP       | -0.0261397 | 1.8088E-07  |
| CENPV      | 0.055843   | 1.81591E-07 |
| AC015712.2 | 0.01556211 | 1.84601E-07 |
| TSPYL1     | -0.0354436 | 1.86035E-07 |
| TLE4       | -0.1125625 | 1.8708E-07  |
| FOCAD      | 0.0473044  | 1.87272E-07 |
| AL591895.1 | -0.0409682 | 1.87367E-07 |
| INTS5      | 0.00463751 | 1.87644E-07 |
| LRRC23     | 0.05292599 | 1.89926E-07 |
| ZBTB42     | -0.0503441 | 1.90063E-07 |
| JOSD2      | -0.0387963 | 1.9121E-07  |
| OGFOD1     | 0.02014065 | 1.94231E-07 |
| AC073111.4 | 0.01707322 | 1.94358E-07 |
| CMC4       | -0.0215864 | 1.96271E-07 |
| ESYT1      | -0.0002201 | 1.97657E-07 |
| AC005523.2 | 0.03316916 | 1.98603E-07 |
| CD79B      | -0.0838886 | 1.99548E-07 |
| TMEM161A   | 0.01940143 | 1.99571E-07 |
| AC078846.1 | 0.04777033 | 2.00503E-07 |
| AC008014.1 | 0.02523411 | 2.00676E-07 |
| FKBP11     | -0.0645114 | 2.0207E-07  |
| RWDD1      | 0.12183839 | 2.02881E-07 |
| BRF1       | -0.0974968 | 2.03815E-07 |
| ZNF813     | 0.05350902 | 2.04905E-07 |
| GIMAP1     | -0.0722562 | 2.06384E-07 |
| AGAP5      | 0.04308439 | 2.06788E-07 |
| HOXA5      | -0.0136606 | 2.07162E-07 |
| WDR77      | -0.0061455 | 2.08113E-07 |
| CENPT      | 0.0064005  | 2.08239E-07 |
| SND1-IT1   | 0.04679863 | 2.09402E-07 |

|            |            |             |
|------------|------------|-------------|
| PET100     | 0.12495568 | 2.11757E-07 |
| CDK5RAP1   | 0.01393243 | 2.12387E-07 |
| ANAPC2     | 0.06097083 | 2.14799E-07 |
| AC027020.2 | 0.04913739 | 2.15073E-07 |
| LINC02175  | 0.04969951 | 2.15292E-07 |
| C2CD3      | 0.00297998 | 2.16665E-07 |
| OXR1       | 0.10349093 | 2.16947E-07 |
| TP53TG1    | 0.08140493 | 2.17346E-07 |
| RNPEP      | -0.0389448 | 2.17412E-07 |
| PAK4       | -0.0131046 | 2.17581E-07 |
| DHTKD1     | 0.08544002 | 2.18639E-07 |
| TATDN2     | -0.0492199 | 2.19536E-07 |
| MARF1      | 0.03253243 | 2.19727E-07 |
| ECD        | -0.0661407 | 2.199E-07   |
| ZNF44      | -0.0432765 | 2.20925E-07 |
| RASGRP4    | -0.1211544 | 2.21306E-07 |
| TTC28      | 0.0375532  | 2.21528E-07 |
| KCTD3      | -0.0062674 | 2.23945E-07 |
| CCPG1      | 0.03439799 | 2.24579E-07 |
| UBP1       | -0.0351348 | 2.24888E-07 |
| SLC25A36   | -0.1550296 | 2.26245E-07 |
| APRT       | 0.17668628 | 2.26746E-07 |
| DHX57      | 0.0484314  | 2.29502E-07 |
| STK4       | -0.185683  | 2.30713E-07 |
| TAF1B      | -0.0107691 | 2.30957E-07 |
| PRR14L     | 0.09878225 | 2.31962E-07 |
| ZNF543     | 0.04797824 | 2.38471E-07 |
| ZNF469     | 0.02037063 | 2.38561E-07 |
| RBM3       | -0.1902251 | 2.38804E-07 |
| AC097634.1 | 0.0218885  | 2.38987E-07 |
| AC004803.1 | 0.04181961 | 2.40711E-07 |
| FPGT       | 0.05681174 | 2.42694E-07 |
| JMJD8      | -0.0375548 | 2.43216E-07 |
| VASH1      | 0.07709024 | 2.45171E-07 |
| TRUB1      | 0.02791561 | 2.45536E-07 |
| LRRC8B     | -0.0921322 | 2.46014E-07 |
| MPZ        | 0.02734912 | 2.47052E-07 |
| RANGAP1    | 0.04126873 | 2.47127E-07 |
| DUBR       | -0.1195027 | 2.48203E-07 |
| MYL5       | -0.0409451 | 2.49539E-07 |
| GBA2       | -0.0536548 | 2.49655E-07 |
| HECTD3     | -0.0161678 | 2.50477E-07 |
| PCGF1      | -0.0246343 | 2.53716E-07 |
| PCGF5      | -0.006661  | 2.54883E-07 |
| AIG1       | -0.0471192 | 2.55389E-07 |
| TAOK1      | 0.04457566 | 2.57243E-07 |
| SETD1A     | 0.01312911 | 2.58662E-07 |
| SSX2IP     | -0.1060093 | 2.59322E-07 |
| MERTK      | 0.06259678 | 2.59791E-07 |
| IFI16      | 0.25006213 | 2.60021E-07 |

|            |            |             |
|------------|------------|-------------|
| MARK2      | -0.0111986 | 2.61439E-07 |
| NUDT19     | 0.03872375 | 2.65477E-07 |
| SELPLG     | -0.0348334 | 2.66206E-07 |
| RBM5       | 0.01106888 | 2.69676E-07 |
| AL157938.3 | 0.04589249 | 2.708E-07   |
| CLSTN1     | 0.04923045 | 2.71198E-07 |
| LTB4R      | -0.0943508 | 2.731E-07   |
| SLC12A2    | 0.02924709 | 2.74171E-07 |
| AC147067.1 | 0.10550707 | 2.7428E-07  |
| SART3      | -0.0416536 | 2.75301E-07 |
| DYNLT3     | -0.0319148 | 2.75818E-07 |
| USP46      | -0.0074086 | 2.77176E-07 |
| TRIP12     | 0.17852614 | 2.7719E-07  |
| ZNF197     | 0.06193717 | 2.78099E-07 |
| DDX47      | 0.02495843 | 2.78668E-07 |
| RRNAD1     | 0.05885197 | 2.7897E-07  |
| ZNF592     | -0.0522304 | 2.82679E-07 |
| TMEM135    | 0.00638839 | 2.86259E-07 |
| TSPOAP1-A  | 0.01329376 | 2.86688E-07 |
| YME1L1     | 0.04174735 | 2.86925E-07 |
| KDM4C      | 0.0464146  | 2.87275E-07 |
| MAP2K2     | -0.0299449 | 2.8873E-07  |
| ARHGEF18   | 0.00705419 | 2.89425E-07 |
| LY86       | 0.00232823 | 2.91761E-07 |
| HEATR5A    | 0.04754319 | 2.92266E-07 |
| GPAM       | 0.04972416 | 2.92818E-07 |
| AL731563.3 | 0.04078607 | 2.93608E-07 |
| RUFY2      | -0.1030229 | 2.93792E-07 |
| SLC37A4    | 0.04050818 | 2.95177E-07 |
| KIF21B     | 0.02585189 | 2.95688E-07 |
| POLM       | -0.0016329 | 2.9578E-07  |
| IL6ST      | -0.0954684 | 2.98212E-07 |
| TMEM265    | 0.06413375 | 2.98568E-07 |
| RRAGD      | 0.03440912 | 2.98957E-07 |
| HLCS       | 0.04206878 | 2.99513E-07 |
| URB2       | 0.01838128 | 3.00891E-07 |
| SMPD1      | -0.0099041 | 3.02544E-07 |
| PHF19      | -0.1495994 | 3.02875E-07 |
| KIF16B     | 0.03850495 | 3.04812E-07 |
| MRM3       | -0.0063319 | 3.05138E-07 |
| AC108488.3 | 0.0533272  | 3.06013E-07 |
| ADGRG3     | -0.0839137 | 3.07375E-07 |
| TCTEX1D1   | 0.06921619 | 3.08032E-07 |
| CSF2RA     | 0.09579786 | 3.09641E-07 |
| DCAF10     | 0.08592564 | 3.11046E-07 |
| FYTTD1     | 0.01133847 | 3.12017E-07 |
| ADA        | 0.08976373 | 3.12228E-07 |
| DBNDD2     | -0.0837067 | 3.12823E-07 |
| CWC15      | -0.1085639 | 3.1314E-07  |
| DDX42      | 0.04835227 | 3.1472E-07  |

|            |            |             |
|------------|------------|-------------|
| STIM1      | 0.00401845 | 3.17005E-07 |
| KIAA1522   | -0.0850986 | 3.18371E-07 |
| ZNF486     | 0.10910038 | 3.24476E-07 |
| NT5C3A     | -0.1121187 | 3.24963E-07 |
| DNAJC25    | 0.03295043 | 3.25292E-07 |
| PSME2      | 0.06549196 | 3.26022E-07 |
| RALGAPB    | -0.0196107 | 3.32007E-07 |
| GOLPH3L    | -0.0249393 | 3.368E-07   |
| UPRT       | -0.0012737 | 3.45917E-07 |
| RBAK       | 0.04248622 | 3.46261E-07 |
| ZFYVE19    | -0.0414091 | 3.46575E-07 |
| PHB        | -0.0545731 | 3.47628E-07 |
| AC005072.1 | -0.0571673 | 3.49061E-07 |
| PSMA3      | -0.1610096 | 3.50801E-07 |
| CEP135     | -0.0357965 | 3.51651E-07 |
| LINC00672  | -0.0783976 | 3.51803E-07 |
| AC078883.1 | 0.02050328 | 3.53799E-07 |
| DNAL1      | -0.0539462 | 3.56011E-07 |
| AC012360.3 | 0.06656583 | 3.66496E-07 |
| ZNF510     | 0.03835041 | 3.68599E-07 |
| SHANK3     | -0.0990022 | 3.68789E-07 |
| DYTN       | 0.03969384 | 3.71055E-07 |
| MTG2       | 0.00094379 | 3.71808E-07 |
| TCN2       | -0.0853292 | 3.74841E-07 |
| MSANTD3    | 0.02947841 | 3.76001E-07 |
| BICRA      | 0.01566576 | 3.76437E-07 |
| ZNF185     | -0.0526619 | 3.78526E-07 |
| ATF7IP2    | -0.036592  | 3.78911E-07 |
| RTL10      | -0.0049654 | 3.81974E-07 |
| SIAH2      | -0.0707112 | 3.82533E-07 |
| RCBTB2     | 0.06091045 | 3.84355E-07 |
| HIC2       | -0.0068401 | 3.84439E-07 |
| AKR1B1     | -0.1024258 | 3.85565E-07 |
| RINL       | 0.04508686 | 3.901E-07   |
| AC008443.5 | 0.07054373 | 3.92641E-07 |
| MPP6       | 0.03588518 | 3.92696E-07 |
| NFYA       | 0.03349593 | 3.94958E-07 |
| NATD1      | 0.01249702 | 3.98332E-07 |
| AP2A2      | 0.01142091 | 3.99532E-07 |
| DNASE1     | -0.0123186 | 4.00217E-07 |
| AC073957.3 | 0.03409354 | 4.01919E-07 |
| HYAL2      | 0.01141384 | 4.02541E-07 |
| CCDC159    | 0.00258931 | 4.08427E-07 |
| ZNF292     | -0.1692654 | 4.08614E-07 |
| NEMF       | 0.11380597 | 4.1118E-07  |
| DOCK7      | 0.00156671 | 4.19436E-07 |
| ABCD3      | 0.0497021  | 4.22069E-07 |
| KIF18A     | -0.1303634 | 4.23151E-07 |
| PABPC1L    | -0.0420515 | 4.24563E-07 |
| CMTM2      | -0.1401964 | 4.28074E-07 |

|            |            |             |
|------------|------------|-------------|
| DCAKD      | 0.02763704 | 4.3007E-07  |
| SEMA4A     | 0.00083511 | 4.33002E-07 |
| UBXN11     | -0.0619544 | 4.3918E-07  |
| ACSL4      | 0.14426556 | 4.54209E-07 |
| SUCO       | 0.01637825 | 4.60242E-07 |
| BET1       | 0.05809291 | 4.61398E-07 |
| OGDH       | -0.0124158 | 4.63539E-07 |
| SNRPD2     | 0.18732865 | 4.71151E-07 |
| MKS1       | 0.02129833 | 4.72841E-07 |
| SERPINB6   | 0.10950272 | 4.74866E-07 |
| TBCCD1     | 0.04580008 | 4.75284E-07 |
| RPS27A     | 0.11857048 | 4.76924E-07 |
| PLOD3      | -0.0695532 | 4.77661E-07 |
| PCNP       | -0.0258729 | 4.79374E-07 |
| LIPE-AS1   | 0.0445687  | 4.8132E-07  |
| ZNF829     | 0.03409088 | 4.81608E-07 |
| CD9        | -0.1258816 | 4.82783E-07 |
| CLTA       | -0.1765788 | 4.83556E-07 |
| AC103691.1 | 0.02740383 | 4.85179E-07 |
| C1QTNF6    | 0.05213651 | 4.89701E-07 |
| FAM174A    | 0.02313826 | 4.96269E-07 |
| AC005674.2 | -0.0045354 | 4.97874E-07 |
| CEP89      | -0.0206947 | 5.00292E-07 |
| IPMK       | -0.0201197 | 5.10698E-07 |
| AC011477.2 | 0.03264409 | 5.1716E-07  |
| PIAS3      | 0.0193873  | 5.19954E-07 |
| BMP1       | -0.0390483 | 5.21069E-07 |
| MRM1       | 0.04319329 | 5.21456E-07 |
| SIDT2      | 0.01042818 | 5.22014E-07 |
| SELENOS    | -0.0773264 | 5.30853E-07 |
| GZF1       | -0.0041688 | 5.33282E-07 |
| PNO1       | 0.07694607 | 5.35788E-07 |
| PRDM11     | 0.00225253 | 5.42315E-07 |
| TRMT10A    | 0.04310183 | 5.45269E-07 |
| IKBIP      | 0.10651533 | 5.46026E-07 |
| PEX19      | 0.00589351 | 5.46141E-07 |
| CIAO2B     | -0.049997  | 5.49659E-07 |
| SNAPC2     | -0.0790447 | 5.49807E-07 |
| MLST8      | 0.02878336 | 5.55629E-07 |
| PPM1M      | 0.03212888 | 5.55677E-07 |
| ZCRB1      | 0.02410801 | 5.56725E-07 |
| CTSO       | 0.07722218 | 5.60197E-07 |
| PRKACA     | 0.05000886 | 5.61089E-07 |
| DHDDS      | -0.0015428 | 5.64314E-07 |
| CXorf40A   | -0.0522345 | 5.65155E-07 |
| NIPSNAP1   | 0.0418343  | 5.65741E-07 |
| BRMS1L     | 0.04809647 | 5.69531E-07 |
| ZNF23      | 0.06100193 | 5.69591E-07 |
| TBC1D16    | 0.04549696 | 5.70795E-07 |
| SLC66A1    | -0.0207413 | 5.79216E-07 |

|            |            |             |
|------------|------------|-------------|
| ZNF850     | 0.03824439 | 5.86871E-07 |
| PAG1       | -0.057902  | 5.8808E-07  |
| RPUSD2     | -0.0316492 | 5.96084E-07 |
| MT-CYB     | 0.21804094 | 5.96983E-07 |
| UBAP2      | 0.04852662 | 5.97182E-07 |
| ORMDL3     | 0.02906423 | 5.99046E-07 |
| UBE2V1     | 0.04607518 | 6.01219E-07 |
| HYI        | 0.03028746 | 6.0911E-07  |
| WAKMAR2    | 0.00417203 | 6.09529E-07 |
| ZNF845     | 0.02100395 | 6.16213E-07 |
| INPP1      | -0.0557268 | 6.16436E-07 |
| SHLD1      | -0.0804964 | 6.19305E-07 |
| AC009506.1 | 0.02632586 | 6.19809E-07 |
| TRIM26     | -0.0614835 | 6.20232E-07 |
| PEA15      | -0.0583388 | 6.22956E-07 |
| RGS12      | 0.05731896 | 6.2491E-07  |
| FBXL6      | -0.0594119 | 6.26073E-07 |
| HIST1H1E   | 0.19149773 | 6.28222E-07 |
| BACE1      | -0.0189879 | 6.29539E-07 |
| TOR1B      | -0.0173478 | 6.32304E-07 |
| ZNF217     | 0.03575914 | 6.36288E-07 |
| SNHG26     | 0.10520478 | 6.36318E-07 |
| COX20      | 0.06081597 | 6.38173E-07 |
| MBTPS2     | 0.03264109 | 6.3869E-07  |
| AC068888.1 | 0.02660796 | 6.38757E-07 |
| AC007325.4 | 0.01655286 | 6.40934E-07 |
| PRCC       | -0.0731347 | 6.42919E-07 |
| LDB1       | 0.05409075 | 6.43602E-07 |
| PAFAH1B3   | -0.006404  | 6.44682E-07 |
| AC240274.1 | 0.0480767  | 6.45027E-07 |
| WDR11      | 0.10022244 | 6.45441E-07 |
| ZBTB48     | -0.0073349 | 6.47834E-07 |
| FSBP       | 0.03764487 | 6.48408E-07 |
| MS4A7      | -0.1276104 | 6.4955E-07  |
| AMZ2       | 0.04355924 | 6.52113E-07 |
| ZNF668     | 0.0271395  | 6.52467E-07 |
| NDUFB9     | -0.125216  | 6.54692E-07 |
| HLA-DPB1   | -0.2900944 | 6.58461E-07 |
| SMN2       | 0.03802827 | 6.7291E-07  |
| ZNF432     | 0.0298883  | 6.75535E-07 |
| CENPP      | 0.02797954 | 6.85066E-07 |
| KLHL36     | -0.0288186 | 6.90835E-07 |
| GATD1      | 0.00352882 | 6.90964E-07 |
| MAP4K2     | -0.0625407 | 6.95911E-07 |
| RHNO1      | 0.00125955 | 7.00106E-07 |
| MRPL48     | 0.04818157 | 7.00764E-07 |
| ABHD4      | -0.0093125 | 7.03047E-07 |
| ZBED5-AS1  | 0.0755004  | 7.08532E-07 |
| MTCL1      | 0.0534919  | 7.09434E-07 |
| CLCN6      | -0.0424282 | 7.09851E-07 |



|            |            |             |
|------------|------------|-------------|
| ZCCHC10    | 0.00044618 | 7.1145E-07  |
| PSMA7      | -0.1548572 | 7.11893E-07 |
| TBC1D31    | 0.01350032 | 7.12581E-07 |
| CHAF1A     | -0.1020038 | 7.13001E-07 |
| AARS       | -0.0065635 | 7.13604E-07 |
| C2CD5      | 0.01637827 | 7.14753E-07 |
| AC146944.4 | 0.03770434 | 7.24339E-07 |
| IFIT2      | 0.00479632 | 7.25962E-07 |
| ZBTB10     | -0.0081576 | 7.29354E-07 |
| SNX1       | 0.00475073 | 7.31662E-07 |
| INVS       | 0.03225538 | 7.32551E-07 |
| GALC       | 0.02470749 | 7.38181E-07 |
| ZNF75D     | 0.05561317 | 7.44075E-07 |
| LINC01134  | 0.05287137 | 7.48853E-07 |
| SLC25A1    | -0.0247657 | 7.65237E-07 |
| SREK1      | 0.12934007 | 7.71429E-07 |
| GPD1L      | 0.04132925 | 7.7967E-07  |
| ZNF644     | 0.00520889 | 7.85229E-07 |
| ELMO2      | -0.0652451 | 7.8783E-07  |
| AP4B1      | -0.0260146 | 7.92269E-07 |
| PPP5C      | 0.02703666 | 8.01736E-07 |
| B4GALT7    | -0.0446024 | 8.10937E-07 |
| SLC15A2    | 0.01493635 | 8.1193E-07  |
| TMEM185A   | -0.0891873 | 8.17058E-07 |
| ANKRD44    | -0.0102428 | 8.23549E-07 |
| MED24      | 0.02654575 | 8.25908E-07 |
| ZNF852     | 0.05743552 | 8.28425E-07 |
| SLC35G2    | -0.0739641 | 8.34342E-07 |
| AC073896.3 | 0.03145781 | 8.37877E-07 |
| ZBTB39     | 0.02529092 | 8.47137E-07 |
| ALDOC      | 0.07549073 | 8.51528E-07 |
| FGD5-AS1   | 0.03332611 | 8.54829E-07 |
| FKBP3      | 0.05546333 | 8.57137E-07 |
| AC009779.2 | 0.02248169 | 8.65893E-07 |
| SLC45A4    | -0.1044627 | 8.68506E-07 |
| PARD6A     | -0.0669146 | 8.69297E-07 |
| VIM-AS1    | -0.2343824 | 8.70472E-07 |
| GALNT2     | 0.12390077 | 8.80547E-07 |
| RBM10      | 0.02406641 | 8.80865E-07 |
| HELZ2      | -0.0964718 | 8.82319E-07 |
| GFER       | -0.0216955 | 8.88721E-07 |
| SIRT3      | -0.028245  | 9.07643E-07 |
| ANKRD36    | 0.06601705 | 9.08526E-07 |
| CHMP7      | -0.0076623 | 9.17759E-07 |
| RBBP6      | 0.17883842 | 9.19088E-07 |
| TRIM13     | 0.03657664 | 9.20893E-07 |
| MAP3K2-DT  | 0.07818379 | 9.23624E-07 |
| ANXA2R     | -0.0779191 | 9.24199E-07 |
| FAM153CP   | 0.03218811 | 9.27349E-07 |
| LCLAT1     | 0.02968883 | 9.27457E-07 |

|            |            |             |
|------------|------------|-------------|
| ANKRD44-IT | -0.0176491 | 9.27895E-07 |
| C15orf65   | -0.0964507 | 9.39378E-07 |
| ZNF324B    | 0.00541784 | 9.48287E-07 |
| CBX5       | 0.11902953 | 9.49247E-07 |
| UVSSA      | 0.07200648 | 9.59871E-07 |
| INO80      | -0.0225194 | 9.67623E-07 |
| ZEB1-AS1   | -0.0697366 | 9.67729E-07 |
| ERCC8      | 0.03601897 | 9.70426E-07 |
| ZNF251     | 0.01899894 | 9.73642E-07 |
| FAF1       | 0.09380411 | 9.76056E-07 |
| SF3B2      | 0.12608756 | 9.77211E-07 |
| PVT1       | 0.06650041 | 9.83671E-07 |
| CA3-AS1    | 0.04518119 | 9.8406E-07  |
| AC246817.2 | 0.03440073 | 9.97305E-07 |
| ETS2       | -0.3114997 | 1.00247E-06 |
| GSS        | 0.03926376 | 1.00561E-06 |
| SLITRK4    | 0.04963036 | 1.01696E-06 |
| PKNOX1     | 0.0051565  | 1.01736E-06 |
| SEC31A     | 0.07007427 | 1.02265E-06 |
| ABCF3      | -0.0332063 | 1.02443E-06 |
| TECPR2     | 0.03510325 | 1.03922E-06 |
| USP38      | 0.00035458 | 1.04141E-06 |
| KPNA5      | -0.029631  | 1.04319E-06 |
| UGDH       | 0.04655172 | 1.04663E-06 |
| ZC3H13     | 0.13985218 | 1.04919E-06 |
| WDR19      | 0.03561474 | 1.06722E-06 |
| SNX30      | 0.07192695 | 1.07503E-06 |
| RBSN       | -0.0250655 | 1.07585E-06 |
| H2AFV      | 0.17887563 | 1.07642E-06 |
| GCC1       | -0.0085178 | 1.07698E-06 |
| NEFH       | 0.06823765 | 1.07803E-06 |
| PYROXD2    | 0.04001341 | 1.08399E-06 |
| HAGHL      | 0.06223685 | 1.08492E-06 |
| FUZ        | -0.0899826 | 1.0974E-06  |
| SMPD4      | -0.0303966 | 1.09937E-06 |
| PMAIP1     | -0.2798938 | 1.10372E-06 |
| ZNF329     | -0.035855  | 1.10386E-06 |
| TMEM67     | -0.1009796 | 1.10858E-06 |
| PRPF38B    | 0.19629373 | 1.11302E-06 |
| PATL2      | 0.00308278 | 1.11377E-06 |
| TTC31      | 0.00884322 | 1.13167E-06 |
| ERBIN      | -0.130794  | 1.15912E-06 |
| GPAT4      | -0.0537982 | 1.16001E-06 |
| CCDC84     | 0.00881816 | 1.16004E-06 |
| CPQ        | -0.0368434 | 1.16577E-06 |
| ZNF180     | 0.0168366  | 1.16857E-06 |
| FEM1A      | 0.04627764 | 1.18409E-06 |
| ATG4A      | 0.01762377 | 1.1877E-06  |
| BOLA3      | -0.0016915 | 1.1914E-06  |
| NPEPL1     | -0.002586  | 1.19394E-06 |

|            |            |             |
|------------|------------|-------------|
| SH3RF1     | -0.0890663 | 1.20163E-06 |
| PLD4       | 0.12607238 | 1.20512E-06 |
| ZNF790     | 0.02621116 | 1.2106E-06  |
| SIK2       | -0.0216545 | 1.21297E-06 |
| AC010745.5 | 0.0641189  | 1.22422E-06 |
| MTHFSD     | 0.03477525 | 1.22598E-06 |
| ZFAT       | 0.03332537 | 1.23514E-06 |
| RANBP3     | -0.0292478 | 1.24683E-06 |
| POMT1      | 0.03773598 | 1.24762E-06 |
| PROCA1     | 0.00431837 | 1.24865E-06 |
| SLC4A7     | 0.08620552 | 1.25528E-06 |
| RPS5       | -0.2735328 | 1.25623E-06 |
| RNF26      | 0.02151578 | 1.27827E-06 |
| TMEM238    | 0.0378645  | 1.27967E-06 |
| NBPF9      | 0.01623977 | 1.2817E-06  |
| PNPLA2     | -0.030371  | 1.28335E-06 |
| MACC1      | 0.02497925 | 1.29642E-06 |
| SCYL1      | -0.0529783 | 1.30621E-06 |
| ATXN7L3B   | 0.05505004 | 1.31054E-06 |
| GEMIN8     | -0.0117608 | 1.31545E-06 |
| WDR44      | -0.059634  | 1.3188E-06  |
| TRIM34     | 0.07650267 | 1.31907E-06 |
| WDR53      | 0.006665   | 1.32064E-06 |
| ACAD11     | -0.0028733 | 1.32927E-06 |
| DIAPH2     | 0.15973636 | 1.33218E-06 |
| KLC4       | 0.01951125 | 1.33582E-06 |
| RNF144B    | 0.0503772  | 1.34626E-06 |
| UBE3B      | 0.01348532 | 1.34648E-06 |
| AL513550.1 | 0.04419868 | 1.35028E-06 |
| KATNAL1    | -0.0137255 | 1.35038E-06 |
| AL157895.1 | 0.31377099 | 1.35851E-06 |
| NDEL1      | -0.1114225 | 1.36257E-06 |
| C10orf25   | 0.05038562 | 1.40766E-06 |
| BTG2       | -0.2459652 | 1.41155E-06 |
| PIAS4      | -0.1237058 | 1.41348E-06 |
| DUSP2      | -0.0652514 | 1.42646E-06 |
| ZNF627     | -0.0114418 | 1.43346E-06 |
| FLOT1      | -0.0412362 | 1.4504E-06  |
| NAALADL1   | 0.0515544  | 1.46498E-06 |
| MSTO1      | 0.00695087 | 1.47124E-06 |
| PPBP       | -0.3462567 | 1.47609E-06 |
| TCF25      | 0.07795    | 1.48397E-06 |
| AL132709.8 | 0.05219163 | 1.48459E-06 |
| SMYD2      | -0.0198199 | 1.49221E-06 |
| TEX22      | 0.01840184 | 1.49499E-06 |
| GOLGA1     | 0.02152361 | 1.49653E-06 |
| SH2B2      | -0.1334127 | 1.50585E-06 |
| TYROBP     | 0.30697534 | 1.51566E-06 |
| FAAP100    | -0.00158   | 1.51662E-06 |
| ZSCAN31    | 0.03930811 | 1.52604E-06 |

|            |            |             |
|------------|------------|-------------|
| KBTBD4     | -0.0423431 | 1.53548E-06 |
| DOP1B      | 0.02650157 | 1.54027E-06 |
| TOP3A      | 0.02067846 | 1.55297E-06 |
| AC027682.4 | 0.04227755 | 1.55774E-06 |
| ESCO1      | -0.0943455 | 1.55876E-06 |
| SLC35D2    | 0.00607985 | 1.56273E-06 |
| IDUA       | 0.02235973 | 1.57632E-06 |
| UBL5       | 0.22154426 | 1.58161E-06 |
| TOB1       | -0.0569163 | 1.60087E-06 |
| CTNNAL1    | -0.0038008 | 1.60472E-06 |
| NPR3       | 0.0280881  | 1.60518E-06 |
| CASTOR1    | 0.01152219 | 1.61477E-06 |
| FMR1-IT1   | 0.03550132 | 1.62099E-06 |
| AC005520.2 | 0.02051312 | 1.62878E-06 |
| BCL2L1     | -0.0112592 | 1.6342E-06  |
| DHFR2      | 0.05418384 | 1.6345E-06  |
| BORCS6     | -0.0214442 | 1.67642E-06 |
| NICN1      | -0.0018134 | 1.68313E-06 |
| NIPSNAP3B  | 0.06573569 | 1.7092E-06  |
| INPP5K     | 0.01401633 | 1.71005E-06 |
| FCHO1      | 0.06602087 | 1.73833E-06 |
| ZNF211     | -0.0437767 | 1.73966E-06 |
| ADAT1      | 0.00925918 | 1.75862E-06 |
| PSMB10     | 0.05738509 | 1.77842E-06 |
| NLRP1      | -0.1384631 | 1.78115E-06 |
| MIER3      | -0.0181569 | 1.78282E-06 |
| SLC35A2    | -0.0871058 | 1.78824E-06 |
| DYNLL2     | -0.0615646 | 1.79338E-06 |
| ARMC7      | -0.0248605 | 1.79835E-06 |
| SNX32      | 0.03722585 | 1.80756E-06 |
| UBR1       | 0.00025413 | 1.80771E-06 |
| XRCC6      | -0.0796679 | 1.81128E-06 |
| C16orf70   | 0.01828374 | 1.81518E-06 |
| CYTH3      | -0.0390912 | 1.82271E-06 |
| LINC00884  | 0.04570636 | 1.83187E-06 |
| SMCO4      | 0.0030511  | 1.83456E-06 |
| TENT5C     | 0.09229095 | 1.84165E-06 |
| NTAN1      | -0.053033  | 1.87045E-06 |
| ATP5MG     | 0.16503711 | 1.89751E-06 |
| CD36       | -0.1692232 | 1.90508E-06 |
| DNASE1L1   | -0.0764353 | 1.90778E-06 |
| NSDHL      | -0.0435456 | 1.90934E-06 |
| TMEM186    | 0.01063945 | 1.93062E-06 |
| SEC24C     | -0.0547497 | 1.93188E-06 |
| STAC3      | 0.05460534 | 1.93355E-06 |
| AC104162.2 | -0.0015677 | 1.93602E-06 |
| NPIPA1     | 0.06392652 | 1.96937E-06 |
| OSBPL3     | -0.0352547 | 1.97007E-06 |
| TRMT1L     | 0.06971541 | 1.97665E-06 |
| ACAA2      | 0.00782293 | 1.97706E-06 |

|            |            |             |
|------------|------------|-------------|
| CHM        | 0.09957947 | 1.9921E-06  |
| C3orf62    | -0.0387269 | 2.01555E-06 |
| AC010615.2 | 0.05873377 | 2.01557E-06 |
| MZT2B      | -0.2229599 | 2.02097E-06 |
| NUP50-DT   | 0.03536409 | 2.05123E-06 |
| PES1       | 0.01272201 | 2.07024E-06 |
| NUDT3      | 0.08008014 | 2.07787E-06 |
| HOOK3      | -0.0896804 | 2.07981E-06 |
| TTC39C     | -0.1045243 | 2.08621E-06 |
| ARFIP2     | -0.0200519 | 2.09698E-06 |
| HIST1H2AE  | -0.1070697 | 2.11607E-06 |
| SBF1       | -0.0525206 | 2.13009E-06 |
| TMEM65     | 0.04298548 | 2.13639E-06 |
| MRPL51     | -0.0036526 | 2.15059E-06 |
| BID        | -0.0516504 | 2.15156E-06 |
| TMEM191B   | 0.025149   | 2.16332E-06 |
| NDUFB2     | 0.13051367 | 2.18061E-06 |
| AGBL3      | 0.04710274 | 2.18158E-06 |
| AC135507.1 | 0.01584339 | 2.18971E-06 |
| ACOT8      | -0.0085163 | 2.19264E-06 |
| PDP1       | -0.0360886 | 2.20842E-06 |
| TRMT5      | 0.04491886 | 2.21754E-06 |
| TRIM66     | 0.05807012 | 2.22982E-06 |
| C15orf41   | 0.03808413 | 2.23345E-06 |
| AC021054.1 | 0.04385889 | 2.27232E-06 |
| PDCD4-AS1  | 0.09278363 | 2.30906E-06 |
| TUBGCP6    | -0.0090804 | 2.33755E-06 |
| MDFI       | 0.04749653 | 2.34892E-06 |
| RUSC1      | -0.0297848 | 2.38004E-06 |
| CHD3       | 0.09202431 | 2.41114E-06 |
| NR4A1      | -0.1291456 | 2.43003E-06 |
| CSAD       | 0.0060371  | 2.45195E-06 |
| KLHL21     | -0.0119173 | 2.4679E-06  |
| AC016588.2 | 0.03902169 | 2.4689E-06  |
| ADGRG5     | -0.0797996 | 2.48845E-06 |
| TRAPPC9    | -0.0051331 | 2.50007E-06 |
| TYW3       | 0.04482628 | 2.50871E-06 |
| MED13L     | -0.0861763 | 2.51478E-06 |
| ZUP1       | -0.0947521 | 2.51629E-06 |
| TCF4       | -0.2122001 | 2.52555E-06 |
| ZFYVE26    | 0.02972508 | 2.52825E-06 |
| PLOD1      | 0.0455892  | 2.54599E-06 |
| BLOC1S3    | -0.0354088 | 2.55619E-06 |
| U2AF1L5    | 0.03319775 | 2.55959E-06 |
| STT3B      | -0.1290601 | 2.56082E-06 |
| IQCE       | 0.02843779 | 2.57558E-06 |
| LRSAM1     | 0.02276358 | 2.5901E-06  |
| PEX7       | 0.04541344 | 2.59179E-06 |
| RAD9A      | -0.0358111 | 2.59407E-06 |
| RBM26      | 0.15738    | 2.59676E-06 |

|            |            |             |
|------------|------------|-------------|
| PDCD2L     | 0.05113896 | 2.60123E-06 |
| GPRC5C     | -0.0722371 | 2.60409E-06 |
| PRUNE1     | 0.00214623 | 2.61272E-06 |
| VANGL1     | -0.2011486 | 2.62472E-06 |
| TOMM22     | 0.05624118 | 2.6943E-06  |
| LIN52      | 0.02312864 | 2.69527E-06 |
| TRPV1      | 0.04343938 | 2.69823E-06 |
| DNAJC12    | 0.06907448 | 2.70262E-06 |
| ZNF672     | 0.0225741  | 2.71396E-06 |
| AC145207.5 | 0.04607919 | 2.72198E-06 |
| SCAF8      | -0.0490474 | 2.76417E-06 |
| STAG2      | -0.0129429 | 2.77498E-06 |
| ZBTB5      | -0.0139559 | 2.79497E-06 |
| LRRC40     | -0.0190828 | 2.81709E-06 |
| U2AF1      | 0.02813302 | 2.82551E-06 |
| EIF3J      | 0.11502476 | 2.86229E-06 |
| CC2D1B     | -0.0744584 | 2.88921E-06 |
| DZIP3      | 0.00853569 | 2.89011E-06 |
| SPTY2D1OS  | 0.04832794 | 2.91703E-06 |
| APTR       | -0.0582283 | 2.92844E-06 |
| TMEM199    | 0.02224377 | 2.93383E-06 |
| PPP1R37    | -0.0222443 | 2.94705E-06 |
| SYVN1      | -0.13472   | 2.97302E-06 |
| SPTLC2     | -0.1020855 | 2.98493E-06 |
| DEK        | 0.11309777 | 2.98909E-06 |
| TARDBP     | -0.2068674 | 3.00658E-06 |
| OAS2       | 0.02871441 | 3.01366E-06 |
| MVD        | -0.0729048 | 3.01845E-06 |
| AL353804.1 | 0.03010144 | 3.02948E-06 |
| TMED2-DT   | 0.06883649 | 3.06997E-06 |
| AC087190.1 | -0.0057437 | 3.07042E-06 |
| PDK2       | 0.02120529 | 3.08984E-06 |
| RAB28      | 0.0385915  | 3.09307E-06 |
| ITPKB      | -0.0518145 | 3.12411E-06 |
| ROGDI      | -0.0458299 | 3.13038E-06 |
| AC093323.1 | 0.07490034 | 3.20483E-06 |
| KLHL12     | -0.0174299 | 3.22253E-06 |
| FLVCR1-DT  | 0.06357233 | 3.24474E-06 |
| AL162458.1 | 0.01390306 | 3.27863E-06 |
| PITPNM1    | 0.04290829 | 3.2911E-06  |
| ZNF354C    | 0.04531839 | 3.29336E-06 |
| AC008443.1 | 0.00940098 | 3.29391E-06 |
| GSTM4      | -0.0056918 | 3.30452E-06 |
| WSB1       | 0.05864967 | 3.30967E-06 |
| ABHD11     | -0.0132151 | 3.32943E-06 |
| DNAJC8     | 0.13481333 | 3.34951E-06 |
| SMC3       | -0.0264374 | 3.37739E-06 |
| DNM1       | -0.0046312 | 3.40667E-06 |
| EME2       | -0.0056451 | 3.41099E-06 |
| BAP1       | -0.0089164 | 3.41217E-06 |

|            |            |             |
|------------|------------|-------------|
| ACTR8      | 0.02195757 | 3.4484E-06  |
| TRIM35     | -0.0391474 | 3.46058E-06 |
| PCSK7      | -0.0563123 | 3.46864E-06 |
| ABR        | -0.036439  | 3.52429E-06 |
| S100B      | -0.113648  | 3.5486E-06  |
| AC009404.1 | 0.0469811  | 3.56061E-06 |
| LDLRAP1    | -0.0301543 | 3.56113E-06 |
| BBS4       | 0.04328639 | 3.56352E-06 |
| RBM19      | 0.03228704 | 3.58706E-06 |
| PLAGL1     | 0.02965906 | 3.58787E-06 |
| C2orf42    | 0.03537925 | 3.59039E-06 |
| AP002360.1 | 0.04122171 | 3.62021E-06 |
| CCNYL1     | -0.0502501 | 3.64111E-06 |
| ZNF865     | 0.04101474 | 3.64789E-06 |
| WDR91      | -0.005676  | 3.65793E-06 |
| AL096865.1 | 0.0104213  | 3.69016E-06 |
| WVOX       | 0.01475761 | 3.7348E-06  |
| KMT2D      | 0.04735285 | 3.73714E-06 |
| CYB561D1   | 0.04847108 | 3.75467E-06 |
| AC025171.3 | -0.016283  | 3.81453E-06 |
| TRIM56     | 0.18963918 | 3.81747E-06 |
| MAST2      | -0.004249  | 3.84049E-06 |
| LINC01023  | -0.0933249 | 3.86197E-06 |
| ZSWIM1     | 0.04094782 | 3.86303E-06 |
| ALKBH6     | 0.01399175 | 3.86635E-06 |
| IKZF4      | 0.0434973  | 3.877E-06   |
| IFI44      | -0.0432147 | 3.88373E-06 |
| ZNF317     | -0.00111   | 3.88568E-06 |
| HNRNPR     | 0.17235496 | 3.88921E-06 |
| AGTPBP1    | 0.03090276 | 3.90163E-06 |
| HSDL1      | 0.0249626  | 3.90621E-06 |
| HSBP1      | -0.0269062 | 3.91593E-06 |
| CCNB1      | 0.02166736 | 3.91938E-06 |
| TRAF3IP2-A | 0.01313877 | 3.94617E-06 |
| TTI1       | 0.0228781  | 3.94964E-06 |
| ARAF       | -0.0350129 | 3.95253E-06 |
| MAP3K3     | -0.0700521 | 3.98408E-06 |
| ATAD3A     | 0.00721722 | 4.0265E-06  |
| KPTN       | -0.0901247 | 4.0431E-06  |
| ENGASE     | 0.03094586 | 4.06993E-06 |
| GNE        | 0.02354881 | 4.1259E-06  |
| TPRN       | 0.04227592 | 4.13714E-06 |
| ZNF775     | -0.1083746 | 4.13836E-06 |
| NECAB3     | 0.01521458 | 4.14109E-06 |
| PTDSS2     | -0.0040653 | 4.15299E-06 |
| ATP5F1E    | 0.20384198 | 4.16072E-06 |
| WDR5       | 0.00771539 | 4.16581E-06 |
| AL161421.1 | 0.03916101 | 4.16691E-06 |
| CLHC1      | 0.08340443 | 4.16836E-06 |
| AOPEP      | 0.00273421 | 4.2605E-06  |

|            |            |             |
|------------|------------|-------------|
| AP001059.3 | -0.0100854 | 4.28816E-06 |
| AKR1C3     | -0.0104048 | 4.31046E-06 |
| TRAFD1     | 0.00993004 | 4.31229E-06 |
| UEVLD      | 0.02340874 | 4.3146E-06  |
| ZNF22      | 0.10749949 | 4.33183E-06 |
| C16orf86   | -0.0102727 | 4.33357E-06 |
| TSC1       | -0.0342977 | 4.34317E-06 |
| KDM5A      | -0.0586094 | 4.34968E-06 |
| TMEM102    | -0.0857162 | 4.42914E-06 |
| TOP1       | -0.0121172 | 4.43854E-06 |
| HNRNPH3    | 0.05890668 | 4.46945E-06 |
| HSPA14     | 0.01237887 | 4.60483E-06 |
| THAP3      | -0.0301228 | 4.62837E-06 |
| NT5DC2     | 0.04713845 | 4.63721E-06 |
| GORASP1    | -0.0046483 | 4.66671E-06 |
| NBPF11     | 0.0376118  | 4.68816E-06 |
| ZNF136     | -0.0044372 | 4.68856E-06 |
| AC006064.4 | 0.02920763 | 4.70967E-06 |
| ERICH6-AS1 | -0.1101976 | 4.75654E-06 |
| DHRS7      | 0.0671494  | 4.79671E-06 |
| SENP3      | 0.01180293 | 4.7982E-06  |
| NFS1       | 0.02578708 | 4.81734E-06 |
| ABHD5      | 0.04082698 | 4.82177E-06 |
| MTCH2      | 5.2102E-05 | 4.82509E-06 |
| GTF2IRD1   | 0.04487984 | 4.84265E-06 |
| ARF5       | 0.06650903 | 4.85605E-06 |
| SV2A       | -0.0424775 | 4.88059E-06 |
| C18orf32   | 0.05838651 | 4.91084E-06 |
| AC234772.2 | 0.01414145 | 4.91972E-06 |
| RUSC2      | -0.0424411 | 4.9333E-06  |
| SEC24A     | -0.047355  | 4.94556E-06 |
| PSMA1      | 0.09546315 | 4.96102E-06 |
| EIF2S2     | -0.1519864 | 4.96598E-06 |
| DNAAF4     | 0.06609026 | 4.98102E-06 |
| NR1D1      | 0.04431833 | 4.98794E-06 |
| TXNDC16    | 0.03808963 | 5.00937E-06 |
| ACCS       | 0.0102739  | 5.03952E-06 |
| SIMC1      | 0.03840554 | 5.04143E-06 |
| ZNF677     | 0.04574412 | 5.1035E-06  |
| ANAPC11    | 0.1349827  | 5.11588E-06 |
| MAP4K4     | 0.06861237 | 5.11617E-06 |
| RAP2A      | 0.01994554 | 5.14095E-06 |
| DNAJC18    | -0.0663807 | 5.23375E-06 |
| TCEAL4     | 0.14728477 | 5.2366E-06  |
| TRAPPC13   | -0.0112912 | 5.2436E-06  |
| LIN9       | 0.05834313 | 5.27583E-06 |
| SNRPD1     | 0.05306514 | 5.2794E-06  |
| TRMT9B     | 0.05379422 | 5.32019E-06 |
| SMAD1      | -0.0345632 | 5.33255E-06 |
| RAP2C-AS1  | -0.0062894 | 5.37704E-06 |



|            |            |             |
|------------|------------|-------------|
| SAYSD1     | 0.0365779  | 5.38238E-06 |
| MLYCD      | 0.06817443 | 5.51786E-06 |
| ENTPD4     | 0.0091391  | 5.52036E-06 |
| AC090204.1 | 0.05251412 | 5.54904E-06 |
| GRK4       | 0.01322614 | 5.56211E-06 |
| LINC01534  | 0.03460357 | 5.56739E-06 |
| ICA1L      | -0.03403   | 5.68275E-06 |
| PANK2      | -0.0931983 | 5.6865E-06  |
| ZNF786     | 0.01062084 | 5.69649E-06 |
| TAF10      | -0.0423837 | 5.7055E-06  |
| TOE1       | 0.05908092 | 5.77272E-06 |
| TRAM1      | -0.0377052 | 5.81941E-06 |
| AL158212.3 | 0.03888957 | 5.83069E-06 |
| AL355377.3 | 0.03229676 | 5.86916E-06 |
| SUGP2      | 0.0929749  | 5.87378E-06 |
| SINHCAF    | -0.0718614 | 5.88997E-06 |
| NAA40      | 0.00778064 | 5.90905E-06 |
| SMUG1      | 0.03332207 | 5.91662E-06 |
| TPMT       | 0.05288669 | 5.95121E-06 |
| DDX6       | -0.0023275 | 5.96938E-06 |
| MTDH       | -0.2098308 | 5.97333E-06 |
| TECPR1     | 0.0035594  | 5.97732E-06 |
| AC107214.1 | 0.03424185 | 6.01889E-06 |
| HOTAIRM1   | 0.0044286  | 6.10117E-06 |
| TRIR       | -0.1663445 | 6.12776E-06 |
| NME2       | 0.18374248 | 6.17659E-06 |
| VPS33B     | -0.048856  | 6.19031E-06 |
| MTMR2      | -0.032053  | 6.20461E-06 |
| SRSF10     | 0.05987208 | 6.21019E-06 |
| INTS1      | -0.0423068 | 6.30443E-06 |
| GTPBP2     | 0.02334443 | 6.31359E-06 |
| ZNF781     | 0.04320618 | 6.33262E-06 |
| VCL        | -0.1004392 | 6.36938E-06 |
| SNRPB2     | 0.09249303 | 6.39178E-06 |
| PEX10      | -0.0100968 | 6.47331E-06 |
| LAMB2      | -0.0676953 | 6.47855E-06 |
| MEF2A      | -0.1228026 | 6.49453E-06 |
| MTA3       | -0.036469  | 6.50364E-06 |
| ACOT2      | 0.01235116 | 6.51686E-06 |
| PPP1R12A   | -0.1694146 | 6.56325E-06 |
| LYST       | 0.26891155 | 6.59309E-06 |
| LINC00921  | 0.01501752 | 6.63357E-06 |
| ZNF212     | -0.0335919 | 6.65251E-06 |
| KLHL26     | -0.0831601 | 6.68216E-06 |
| NIPAL3     | -0.0249045 | 6.69037E-06 |
| PDSS1      | 0.01069328 | 6.75325E-06 |
| DUSP5      | -0.1385656 | 6.79111E-06 |
| YJU2       | -0.0565128 | 6.83935E-06 |
| RAPGEF6    | -0.0579989 | 6.84525E-06 |
| CDKAL1     | 0.03920873 | 6.85289E-06 |

|            |            |             |
|------------|------------|-------------|
| AC008771.1 | 0.03865706 | 6.89726E-06 |
| ASH1L-AS1  | -0.0456428 | 6.92832E-06 |
| AGMAT      | 0.04559823 | 6.93928E-06 |
| STARD3     | -0.0325734 | 6.96404E-06 |
| RHBDD2     | -0.112042  | 6.97076E-06 |
| EPS15      | 0.12211439 | 6.99359E-06 |
| PRPF40A    | -0.1915979 | 7.03975E-06 |
| ZG16B      | -0.1194803 | 7.05451E-06 |
| SEPSECS-A  | 0.06378275 | 7.06418E-06 |
| SEC24D     | -0.0030527 | 7.06582E-06 |
| ELANE      | 0.27672771 | 7.08399E-06 |
| CLIC3      | -0.1275297 | 7.09651E-06 |
| HNRNPM     | 0.16956113 | 7.10665E-06 |
| CPEB2      | -0.0370047 | 7.13044E-06 |
| OPTN       | -0.1278077 | 7.14972E-06 |
| AC104532.2 | 0.01091389 | 7.27853E-06 |
| TTYH3      | -0.0383389 | 7.36991E-06 |
| LINC00923  | 0.04509176 | 7.40807E-06 |
| LBR        | -0.0973212 | 7.51351E-06 |
| ACOX3      | 0.01925643 | 7.52254E-06 |
| TBCE.1     | -0.0064128 | 7.53237E-06 |
| NBPF1      | 0.02873219 | 7.55601E-06 |
| PCTP       | 0.04278156 | 7.60693E-06 |
| PSMB8      | -0.0224632 | 7.6087E-06  |
| TAF6L      | 0.02137351 | 7.61774E-06 |
| GLIDR      | 0.03518745 | 7.7023E-06  |
| GPN2       | -0.0241588 | 7.85291E-06 |
| AL135791.1 | 0.03628155 | 7.89182E-06 |
| KLHL2      | -0.042384  | 7.89224E-06 |
| ZNF525     | 0.05003052 | 7.90563E-06 |
| CRAT       | 0.02653724 | 8.01196E-06 |
| TAOK2      | -0.0102293 | 8.01436E-06 |
| SH3BP5L    | -0.0338365 | 8.0494E-06  |
| PRPF4B     | -0.1351656 | 8.05888E-06 |
| NUBPL      | 0.05717582 | 8.16566E-06 |
| GIMAP8     | 0.02370887 | 8.21099E-06 |
| ZNF789     | -0.0245345 | 8.29296E-06 |
| FAM8A1     | 0.00339096 | 8.32579E-06 |
| GNB1       | 0.02422981 | 8.39724E-06 |
| RABEP2     | -0.127627  | 8.39802E-06 |
| ATP5MF     | 0.14485629 | 8.49673E-06 |
| AL356019.2 | 0.05090969 | 8.50925E-06 |
| EID3       | 0.02299294 | 8.51103E-06 |
| UBE2I      | -0.1714829 | 8.5657E-06  |
| NBPF12     | 0.06017058 | 8.60929E-06 |
| RASGEF1A   | -0.0155707 | 8.61131E-06 |
| PNMA6A     | 0.03652671 | 8.66762E-06 |
| AC010680.4 | 0.0295968  | 8.70596E-06 |
| PSMD8      | -0.1410979 | 8.78456E-06 |
| AC006141.1 | 0.11361993 | 8.79605E-06 |

|            |            |             |
|------------|------------|-------------|
| SSH3       | 0.00926381 | 8.84828E-06 |
| LPXN       | 0.00954476 | 8.88769E-06 |
| KIF13A     | -0.0010421 | 8.93325E-06 |
| CLOCK      | 0.05207663 | 9.06064E-06 |
| TXNL4B     | -0.0017192 | 9.06216E-06 |
| TTLL1      | 0.050355   | 9.09579E-06 |
| LARS2      | -0.0027854 | 9.12259E-06 |
| RAB33B     | -0.0068445 | 9.13441E-06 |
| ZNF347     | 0.05877699 | 9.18767E-06 |
| SOD1       | -0.1504386 | 9.19646E-06 |
| TPP2       | 0.04749435 | 9.25167E-06 |
| CENPL      | 0.02427912 | 9.27852E-06 |
| FMR1       | -0.0008368 | 9.29942E-06 |
| SELENOI    | -0.0147431 | 9.30428E-06 |
| ATXN7L3    | 0.02294954 | 9.32448E-06 |
| SIRT6      | -0.0086226 | 9.33162E-06 |
| PIGZ       | 0.03933063 | 9.44848E-06 |
| AC243960.1 | -0.0041684 | 9.5545E-06  |
| NFIX       | 0.05429995 | 9.5692E-06  |
| MEPCE      | -0.0043901 | 9.58462E-06 |
| MARCH1     | -0.1430509 | 9.64711E-06 |
| DALRD3     | -0.1216236 | 9.661E-06   |
| RAB31      | -0.1839014 | 9.67643E-06 |
| PARP6      | -0.0509322 | 9.68048E-06 |
| GSTK1      | -0.1708846 | 9.80838E-06 |
| SMG9       | -0.0040762 | 9.90025E-06 |
| MFHAS1     | 0.03962298 | 9.94194E-06 |
| AGXT       | 0.05365051 | 9.9939E-06  |
| PROSER3    | -0.0502013 | 1.01211E-05 |
| CCL28      | 0.04642595 | 1.01228E-05 |
| C19orf54   | 0.01841899 | 1.01749E-05 |
| DUSP7      | -0.0669505 | 1.02284E-05 |
| FGFR1OP2   | -0.0021303 | 1.02328E-05 |
| PPM1L      | -0.0037404 | 1.02707E-05 |
| RACGAP1    | 0.03604875 | 1.02939E-05 |
| GADD45GIP  | -0.1111182 | 1.03494E-05 |
| TRDMT1     | -0.0243492 | 1.03516E-05 |
| LRCH1      | -0.0445748 | 1.03839E-05 |
| ZNF133     | 0.01319087 | 1.04474E-05 |
| ZMAT2      | 0.02334408 | 1.04478E-05 |
| ANGEL1     | 0.03040408 | 1.06116E-05 |
| TTC24      | -0.0120697 | 1.0653E-05  |
| RAB10      | -0.0985097 | 1.07031E-05 |
| PARP15     | 0.01659519 | 1.0752E-05  |
| AC124283.1 | 0.01326701 | 1.07811E-05 |
| SWT1       | 0.01758616 | 1.08763E-05 |
| AC015871.7 | 0.01281313 | 1.0881E-05  |
| ZNF219     | 0.01899571 | 1.10272E-05 |
| HCG25      | 0.06266013 | 1.11036E-05 |
| ANKFY1     | 0.03392902 | 1.11425E-05 |

|            |            |             |
|------------|------------|-------------|
| IL18       | 0.22378245 | 1.11483E-05 |
| AGBL5      | -0.0451502 | 1.11787E-05 |
| AC009120.2 | 0.0623932  | 1.12015E-05 |
| BBX        | 0.0082872  | 1.12345E-05 |
| C6orf163   | 0.04201708 | 1.12883E-05 |
| AC008982.2 | 0.03621809 | 1.13028E-05 |
| SLF1       | 0.00914871 | 1.13524E-05 |
| MAP4K1     | -0.0135861 | 1.16005E-05 |
| CASZ1      | -0.0727667 | 1.17097E-05 |
| CCDC88A    | 0.14431418 | 1.17232E-05 |
| ZNF436-AS1 | -0.0164447 | 1.17749E-05 |
| NET1       | 0.06078711 | 1.17821E-05 |
| AC103702.1 | -0.0885285 | 1.17996E-05 |
| TNFAIP1    | -0.0781404 | 1.1814E-05  |
| AC009118.3 | 0.03472805 | 1.1816E-05  |
| USP21      | 0.01938477 | 1.18191E-05 |
| AC003681.1 | 0.04848906 | 1.18339E-05 |
| LMLN       | 0.0325022  | 1.1834E-05  |
| ISG20      | -0.1381946 | 1.19333E-05 |
| ATP5F1B    | -0.2003549 | 1.19344E-05 |
| DHX35      | 0.01424175 | 1.19745E-05 |
| LY6G5B     | 0.02010882 | 1.21062E-05 |
| FRMD8      | 0.0108444  | 1.22251E-05 |
| HIST1H2AM  | 0.04923694 | 1.22914E-05 |
| NEU3       | 0.04606657 | 1.25655E-05 |
| P2RY1      | 0.04711557 | 1.25931E-05 |
| DVL2       | 0.01950291 | 1.26486E-05 |
| SHPK       | 0.02676454 | 1.26521E-05 |
| FBXL18     | 0.03524596 | 1.26798E-05 |
| NDUFC2     | 0.15082716 | 1.27126E-05 |
| PTX3       | -0.2040082 | 1.27159E-05 |
| RBPJ       | -0.0548527 | 1.27348E-05 |
| MAK16      | 0.03389234 | 1.27666E-05 |
| BPNT1      | 0.02973038 | 1.27777E-05 |
| VCPKMT     | -0.0832298 | 1.2857E-05  |
| AC012306.2 | 0.03420436 | 1.29507E-05 |
| KMT2A      | -0.1882047 | 1.30428E-05 |
| ZNF335     | -0.0337957 | 1.30686E-05 |
| SHLD3      | 0.03182233 | 1.31064E-05 |
| BPGM       | 0.03699151 | 1.31335E-05 |
| MAFIP      | 0.04626683 | 1.31391E-05 |
| EYA3       | -0.0742231 | 1.31427E-05 |
| ZNF501     | 0.01470151 | 1.32333E-05 |
| GHITM      | 0.10006415 | 1.33745E-05 |
| GIHCG      | 0.22196142 | 1.34029E-05 |
| CCDC24     | -0.0814328 | 1.35638E-05 |
| AC022150.4 | 0.03904393 | 1.36473E-05 |
| FNBP4      | -0.1577243 | 1.3778E-05  |
| CWF19L1    | -0.0128992 | 1.40482E-05 |
| OSBPL7     | 0.01594702 | 1.41173E-05 |

|            |            |             |
|------------|------------|-------------|
| DHX36      | 0.0027027  | 1.4581E-05  |
| GMPPA      | 0.00781736 | 1.46463E-05 |
| PRELID2    | 0.02418456 | 1.46851E-05 |
| NR1H3      | -0.0312162 | 1.47609E-05 |
| INIP       | 0.04823261 | 1.48062E-05 |
| LIG1       | -0.015224  | 1.48761E-05 |
| AC009005.1 | 0.04853803 | 1.48842E-05 |
| LINC00174  | 0.0615596  | 1.4936E-05  |
| CYP51A1    | 0.04870695 | 1.50855E-05 |
| SCN1B      | -0.1475694 | 1.51392E-05 |
| LIMS1      | -0.0410633 | 1.52456E-05 |
| AC009093.2 | 0.06198776 | 1.52696E-05 |
| GYS1       | 0.0680283  | 1.53477E-05 |
| GXYLT1     | 0.01154755 | 1.54449E-05 |
| MICAL1     | -0.0853068 | 1.54571E-05 |
| NIPA1      | -0.0499946 | 1.55252E-05 |
| NLE1       | -0.0075115 | 1.5546E-05  |
| SRXN1      | -0.0102333 | 1.56277E-05 |
| CRNKL1     | -0.0304439 | 1.56279E-05 |
| AL590064.1 | 0.02750099 | 1.56288E-05 |
| RTL6       | -0.0036658 | 1.56941E-05 |
| TAB1       | 0.02064788 | 1.57752E-05 |
| RPP25      | 0.03154586 | 1.57842E-05 |
| BORA       | 0.0507424  | 1.58801E-05 |
| STPG1      | -0.0631927 | 1.59621E-05 |
| TMEM120A   | 0.008915   | 1.59848E-05 |
| NOP14-AS1  | -0.0529844 | 1.60851E-05 |
| PRAF2      | -0.0623505 | 1.61001E-05 |
| ARFGEF2    | -0.0495352 | 1.62086E-05 |
| GAB1       | 0.00577047 | 1.63877E-05 |
| KLHL15     | 0.03816121 | 1.6656E-05  |
| AL357079.1 | 0.06192965 | 1.67184E-05 |
| HCLS1      | 0.13243373 | 1.68795E-05 |
| CSTA       | 0.14078684 | 1.70143E-05 |
| PPOX       | -0.0172961 | 1.71648E-05 |
| AC046134.2 | 0.02685736 | 1.71928E-05 |
| SPDL1      | 0.10412411 | 1.73546E-05 |
| CAPN11     | -0.0925509 | 1.74932E-05 |
| ZFYVE27    | 0.01927169 | 1.74964E-05 |
| MAP3K7     | 0.01807172 | 1.75112E-05 |
| KLF7       | 0.02283395 | 1.7544E-05  |
| RAB38      | 0.04850858 | 1.76574E-05 |
| CHI3L1     | 0.07357357 | 1.77019E-05 |
| SAMD9L     | -0.0265217 | 1.79123E-05 |
| LRRC61     | -0.0199882 | 1.80807E-05 |
| ARHGAP19   | 0.00566244 | 1.80825E-05 |
| TRAPPC5    | 0.15711069 | 1.86013E-05 |
| AL391832.2 | -0.0018404 | 1.87325E-05 |
| ZDHHC8     | -0.050476  | 1.89105E-05 |
| EEF1G      | -0.184697  | 1.89401E-05 |

|            |            |             |
|------------|------------|-------------|
| BCLAF3     | -0.0430428 | 1.89929E-05 |
| TCF7       | 0.02917591 | 1.89968E-05 |
| AK5        | -0.077286  | 1.90748E-05 |
| S1PR2      | -0.0710283 | 1.94873E-05 |
| BLOC1S1    | -0.0070204 | 1.95878E-05 |
| ING5       | 0.044054   | 1.96102E-05 |
| BDNF-AS    | 0.05783509 | 1.96558E-05 |
| ITGA6      | 0.08872206 | 1.98098E-05 |
| PNRC1      | 0.14521095 | 1.98529E-05 |
| ZNF549     | -0.0073265 | 1.99182E-05 |
| PHETA1     | -0.0792334 | 2.00328E-05 |
| C1QTNF3    | 0.03897338 | 2.00994E-05 |
| ZNF30      | 0.03595072 | 2.01089E-05 |
| ZKSCAN7    | 0.03675396 | 2.02412E-05 |
| PSPC1      | 0.00847852 | 2.04047E-05 |
| PIGB       | 0.04216613 | 2.05548E-05 |
| CCHCR1     | 0.03345355 | 2.05617E-05 |
| PDP2       | 0.01328397 | 2.05683E-05 |
| SRGAP2     | -0.0138582 | 2.06952E-05 |
| NEK4       | 0.07337569 | 2.08247E-05 |
| CNBD2      | 0.0090696  | 2.11476E-05 |
| AC017083.1 | 0.01204404 | 2.12856E-05 |
| RAD52      | 0.05461117 | 2.13684E-05 |
| SGMS1      | -0.0573297 | 2.13923E-05 |
| H2AFX      | -0.0568132 | 2.16547E-05 |
| PFDN4      | -0.0489476 | 2.16641E-05 |
| UBXN2B     | 0.05914501 | 2.19408E-05 |
| ZNF620     | 0.04935829 | 2.20004E-05 |
| RBMX       | 0.14157009 | 2.20038E-05 |
| TEP1       | -0.0475205 | 2.20594E-05 |
| DNAJC28    | 0.05223018 | 2.21973E-05 |
| NEIL2      | -0.0170128 | 2.222E-05   |
| MTHFR      | 0.03669782 | 2.25318E-05 |
| ZNF611     | 0.0146473  | 2.26207E-05 |
| ARMT1      | -0.0109097 | 2.29536E-05 |
| BTG1       | -0.0225556 | 2.2969E-05  |
| ZNF236     | -0.0234285 | 2.31221E-05 |
| FOXJ2      | 0.00357543 | 2.33182E-05 |
| PTAR1      | 0.02383046 | 2.3342E-05  |
| ZNF324     | -0.0242403 | 2.34458E-05 |
| SEC61G     | -0.0779015 | 2.38534E-05 |
| VAC14      | 0.04645476 | 2.40975E-05 |
| AL391121.1 | -0.0603283 | 2.41426E-05 |
| TP53I3     | -0.0713602 | 2.43236E-05 |
| DNMBP      | -0.114956  | 2.43248E-05 |
| TYW5       | 0.0217539  | 2.44167E-05 |
| ACE        | -0.1187194 | 2.47127E-05 |
| NDUFAF5    | -0.0135051 | 2.48875E-05 |
| HPDL       | 0.03340027 | 2.49619E-05 |
| C4orf33    | 0.02360655 | 2.52057E-05 |

|            |            |             |
|------------|------------|-------------|
| AC024560.4 | 0.02926445 | 2.52241E-05 |
| FASTKD5    | 0.04523466 | 2.52788E-05 |
| ATG16L1    | -0.0113316 | 2.5283E-05  |
| DDX5       | -0.2736301 | 2.52875E-05 |
| PRC1       | -0.053488  | 2.54098E-05 |
| TMPRSS9    | 0.06973501 | 2.58014E-05 |
| ALKBH8     | 0.00415442 | 2.60543E-05 |
| PPP2R1B    | -0.0418949 | 2.62512E-05 |
| ACSL3      | -0.0947776 | 2.6312E-05  |
| MN1        | -0.1303296 | 2.6329E-05  |
| BOLA1      | 0.02882199 | 2.64648E-05 |
| CTBS       | 0.10857462 | 2.66375E-05 |
| RWDD3      | -0.0080155 | 2.67692E-05 |
| SLC2A11    | 0.03481805 | 2.68764E-05 |
| TMEM138    | 0.02655948 | 2.69699E-05 |
| UHRF1BP1   | 0.02547146 | 2.70206E-05 |
| ZNF696     | 0.02327306 | 2.70681E-05 |
| TMEM154    | 0.02114392 | 2.707E-05   |
| AC127521.1 | 0.00168915 | 2.71814E-05 |
| P2RX7      | 0.02379683 | 2.75272E-05 |
| DLC1       | 0.04972889 | 2.77073E-05 |
| CCNG1      | -0.0115966 | 2.7741E-05  |
| AC027644.3 | -0.0355872 | 2.77431E-05 |
| AC074032.1 | 0.05006128 | 2.77474E-05 |
| EMC10      | -0.0084883 | 2.79889E-05 |
| SLC9A7     | -0.038994  | 2.85082E-05 |
| AL591845.1 | 0.04217555 | 2.87061E-05 |
| LEPR       | 0.05590153 | 2.91889E-05 |
| AC008957.1 | 0.02752264 | 2.94379E-05 |
| SPATA5L1   | -0.0067223 | 2.95497E-05 |
| RAB40B     | 0.03753993 | 2.97238E-05 |
| DONSON     | -0.0034479 | 2.97308E-05 |
| TRMT2B     | 0.0686103  | 3.03707E-05 |
| KIAA1328   | 0.013968   | 3.05532E-05 |
| FLVCR1     | 0.04480801 | 3.05729E-05 |
| ZNF747     | 0.00707985 | 3.098E-05   |
| AC067852.2 | -0.0121526 | 3.1019E-05  |
| RINT1      | 0.0174929  | 3.13503E-05 |
| AC009812.1 | 0.04632407 | 3.15555E-05 |
| FARP2      | 0.02044919 | 3.15749E-05 |
| CD27-AS1   | -0.084526  | 3.16061E-05 |
| CLYBL      | 0.07273808 | 3.16902E-05 |
| RPL10A     | -0.1904751 | 3.19537E-05 |
| AL080317.1 | 0.04359324 | 3.19793E-05 |
| WRAP53     | 0.01874719 | 3.20231E-05 |
| ZNF527     | 0.02613522 | 3.22858E-05 |
| OBSL1      | 0.01313431 | 3.23767E-05 |
| PHF13      | -0.0882957 | 3.23786E-05 |
| TUBG1      | -0.0423728 | 3.26102E-05 |
| CTIF       | 0.03026744 | 3.27234E-05 |

|            |            |             |
|------------|------------|-------------|
| PCGF3      | -0.0825177 | 3.28597E-05 |
| SLC9A8     | -0.0053995 | 3.29215E-05 |
| MIOS       | -0.0237152 | 3.29424E-05 |
| HAUS5      | -0.0050875 | 3.29856E-05 |
| DDX17      | 0.17767578 | 3.31715E-05 |
| ZFP28      | -0.0647456 | 3.35581E-05 |
| CRTC1      | -0.0246805 | 3.38319E-05 |
| LINC01238  | 0.03615243 | 3.40103E-05 |
| CEP68      | -0.0134833 | 3.41309E-05 |
| PEAK1      | -0.1229766 | 3.44795E-05 |
| PYGO2      | -0.0206311 | 3.48599E-05 |
| DNAJC30    | -0.0634016 | 3.51034E-05 |
| KLHL7      | -0.0612669 | 3.52369E-05 |
| C19orf44   | 0.03018384 | 3.5474E-05  |
| JMJD7      | -0.0312319 | 3.58618E-05 |
| CDCP1      | -0.063668  | 3.61192E-05 |
| RNF31      | -0.003471  | 3.6198E-05  |
| AC073896.2 | 0.02084945 | 3.7032E-05  |
| CPA3       | 0.25099663 | 3.70369E-05 |
| PRKAR2B    | -0.01116   | 3.71175E-05 |
| NABP1      | -0.152731  | 3.7454E-05  |
| PINLYP     | 0.02443566 | 3.77849E-05 |
| GRB10      | -0.0524379 | 3.78789E-05 |
| PORCN      | 0.03717719 | 3.79137E-05 |
| ZNF296     | -0.083173  | 3.83757E-05 |
| TAF2       | -0.0714031 | 3.85329E-05 |
| MICU3      | -0.0294374 | 3.86741E-05 |
| TYMSOS     | 0.02520464 | 3.90941E-05 |
| WDYHV1     | 0.00914017 | 3.93843E-05 |
| AC099343.3 | -0.0283413 | 3.93914E-05 |
| BAZ1A      | -0.0671572 | 3.96418E-05 |
| PRKAB1     | -0.0760416 | 3.99879E-05 |
| NETO2      | 0.03141106 | 4.01772E-05 |
| CCT6A      | 0.14610243 | 4.0191E-05  |
| SSR3       | 0.10449759 | 4.02922E-05 |
| AL035587.1 | 0.01825146 | 4.03767E-05 |
| RBL1       | 0.05942506 | 4.04594E-05 |
| SGTB       | -0.0701785 | 4.04665E-05 |
| AL021155.5 | 0.00775691 | 4.06243E-05 |
| AC011939.2 | -0.0610649 | 4.06603E-05 |
| LINC02762  | -0.1089761 | 4.07585E-05 |
| TM7SF2     | 0.03200307 | 4.10284E-05 |
| AL157834.1 | 0.04763003 | 4.17629E-05 |
| AL109628.2 | 0.04256595 | 4.19817E-05 |
| DHCR7      | 0.04754716 | 4.22351E-05 |
| ZNF614     | 0.0105958  | 4.23139E-05 |
| PLEKHG2    | -0.0636762 | 4.25471E-05 |
| AC006427.2 | 0.04119572 | 4.26683E-05 |
| ALMS1      | 0.01629901 | 4.34752E-05 |
| TTLL4      | -0.0048378 | 4.35352E-05 |



|            |            |             |
|------------|------------|-------------|
| DOP1A      | 0.00993963 | 4.36905E-05 |
| LBH        | 0.16454734 | 4.39117E-05 |
| PPT2       | -0.0257734 | 4.41003E-05 |
| INTS6L     | -0.0125418 | 4.42612E-05 |
| CCDC9      | -0.0804672 | 4.43037E-05 |
| TVP23C     | 0.02482685 | 4.44705E-05 |
| MIR29B2CH1 | -0.0809222 | 4.45887E-05 |
| TNNT3      | -0.0908761 | 4.46137E-05 |
| RNPS1      | -0.0112188 | 4.50699E-05 |
| SH3PXD2A   | 0.07382371 | 4.54188E-05 |
| LSM11      | 0.04153652 | 4.55979E-05 |
| MDGA1      | 0.02326261 | 4.59559E-05 |
| TXNRD2     | 0.00558994 | 4.61593E-05 |
| DENND6A    | -0.0209198 | 4.62012E-05 |
| AC004076.2 | 0.02099856 | 4.6489E-05  |
| RHOBTB2    | 0.02453711 | 4.6549E-05  |
| TMEM175    | -0.0254975 | 4.65761E-05 |
| SLC38A6    | 0.04260542 | 4.66536E-05 |
| RMDN2      | 0.03934851 | 4.68535E-05 |
| KIAA0753   | -0.0084523 | 4.70352E-05 |
| CENPK      | 0.00559911 | 4.75155E-05 |
| PSTK       | -0.0101134 | 4.90849E-05 |
| LRRC37B    | -0.0561944 | 4.91239E-05 |
| SPACA9     | -0.0903908 | 4.94985E-05 |
| PURA       | 0.05872392 | 4.98298E-05 |
| C19orf81   | 0.05706447 | 5.1258E-05  |
| FAM234B    | 0.02563402 | 5.16538E-05 |
| AL117336.2 | 0.04453275 | 5.18276E-05 |
| GSTZ1      | -0.0295563 | 5.18481E-05 |
| SMYD5      | 0.0314621  | 5.19147E-05 |
| ADCK2      | -0.0010503 | 5.19409E-05 |
| EML4       | -0.1131334 | 5.26328E-05 |
| AC021097.1 | 0.04296112 | 5.28536E-05 |
| CNEP1R1    | -0.0682708 | 5.3036E-05  |
| OFD1       | 0.06683487 | 5.36712E-05 |
| GOLGA4     | -0.0304622 | 5.39117E-05 |
| ELL        | -0.1132629 | 5.48971E-05 |
| TMEM50A    | -0.049264  | 5.54651E-05 |
| NME7       | 0.05350305 | 5.65566E-05 |
| ACER3      | 0.0266731  | 5.67917E-05 |
| UFSP2      | -0.0692645 | 5.72614E-05 |
| ADGRA2     | 0.04318888 | 5.81341E-05 |
| KNTC1      | -0.0310513 | 5.9609E-05  |
| AC139530.1 | 0.00714635 | 5.98119E-05 |
| RANBP10    | -0.0220756 | 5.98912E-05 |
| TDRD7      | -0.0132789 | 6.01333E-05 |
| ZNF569     | 0.01356203 | 6.05287E-05 |
| HARS2      | -0.0281738 | 6.06533E-05 |
| C12orf43   | -0.0322128 | 6.08287E-05 |
| FANCI      | 0.01273808 | 6.08752E-05 |

|            |            |             |
|------------|------------|-------------|
| LAMTOR1    | 0.17381993 | 6.27012E-05 |
| AMZ1       | -0.0857386 | 6.29723E-05 |
| NOL7       | -0.1322947 | 6.38306E-05 |
| HSPA9      | 0.00462733 | 6.3854E-05  |
| TTC38      | 0.00749477 | 6.55021E-05 |
| KIF11      | 0.04984356 | 6.63794E-05 |
| DECR2      | 0.030942   | 6.65409E-05 |
| HSD17B8    | 0.01433742 | 6.72195E-05 |
| STK39      | 0.03075849 | 6.7466E-05  |
| TRMT12     | 0.02140658 | 6.82494E-05 |
| TAS2R30    | 0.01506106 | 6.86184E-05 |
| MALRD1     | 0.01016325 | 6.87184E-05 |
| CLCC1      | 0.01736125 | 6.89852E-05 |
| CAHM       | 0.01945494 | 6.92573E-05 |
| AC083862.3 | -0.0421735 | 6.93623E-05 |
| SEPTIN2    | 0.01645382 | 6.95728E-05 |
| IQSEC1     | -0.0967495 | 6.9837E-05  |
| EZH2       | -0.1257901 | 7.00348E-05 |
| AC009831.3 | -0.0426273 | 7.06916E-05 |
| TBC1D32    | 0.0448588  | 7.07163E-05 |
| ZNF207     | 0.09081134 | 7.12448E-05 |
| AL035587.2 | 0.03612667 | 7.14775E-05 |
| C9orf72    | 0.00872368 | 7.16413E-05 |
| ADAMDEC1   | 0.06555656 | 7.22583E-05 |
| SEC62      | -0.0902219 | 7.26165E-05 |
| PRICKLE3   | 0.01195759 | 7.27768E-05 |
| YIPF4      | 0.10572105 | 7.27845E-05 |
| SPATA20    | -0.0326814 | 7.27861E-05 |
| ZNF76      | 0.03141166 | 7.29044E-05 |
| MIR1915HG  | -0.0002958 | 7.42058E-05 |
| TRGC2      | 0.02398376 | 7.48165E-05 |
| SUFU       | 0.01014399 | 7.49484E-05 |
| NDUFV2-AS  | 0.01263571 | 7.55331E-05 |
| EXD3       | -0.0519355 | 7.56465E-05 |
| TUT1       | 0.00526135 | 7.59461E-05 |
| USP8       | 0.02166233 | 7.60539E-05 |
| VPS52      | 0.01245551 | 7.67764E-05 |
| SCAPER     | 0.04138989 | 7.75577E-05 |
| FAM131A    | -0.0984905 | 7.83833E-05 |
| KCNQ1OT1   | 0.43780418 | 7.84921E-05 |
| ZNF225     | 0.01239201 | 7.86035E-05 |
| CCDC167    | -0.0237728 | 7.93886E-05 |
| AC010680.3 | 0.03336398 | 7.96493E-05 |
| HNRNPD     | 0.10268508 | 7.96728E-05 |
| RWDD2B     | 0.06336918 | 8.14293E-05 |
| AARS2      | 0.05899537 | 8.14501E-05 |
| AC108047.1 | 0.02223454 | 8.24208E-05 |
| NHEJ1      | 0.0424815  | 8.37292E-05 |
| ZNF713     | 0.03626453 | 8.4276E-05  |
| MYO1G      | -0.1093133 | 8.48461E-05 |

|            |            |             |
|------------|------------|-------------|
| PTGS1      | 0.08168945 | 8.53712E-05 |
| RNF121     | 0.03388017 | 8.55359E-05 |
| SH3GLB2    | -0.0332786 | 8.56865E-05 |
| AC004034.1 | 0.01616003 | 8.62889E-05 |
| SOCS6      | -0.0136872 | 8.70728E-05 |
| TMOD2      | 0.02841888 | 8.7113E-05  |
| FKBP15     | -0.0219331 | 8.72922E-05 |
| MEST       | 0.01285796 | 8.74434E-05 |
| PDIA5      | 0.0091452  | 8.81326E-05 |
| MARK4      | -0.0184838 | 8.81505E-05 |
| ARFRP1     | -0.0702357 | 9.01263E-05 |
| SEC11A     | -0.0635331 | 9.16988E-05 |
| AC107375.1 | 0.00910511 | 9.22368E-05 |
| E2F3-IT1   | 0.009841   | 9.51452E-05 |
| ACTR3      | -0.1254237 | 9.60901E-05 |
| ZNF678     | 0.05493024 | 9.65369E-05 |
| XRCC2      | 0.04348158 | 9.66953E-05 |
| BSPRY      | -0.1225044 | 9.67534E-05 |
| AC106707.1 | 0.02749329 | 9.70211E-05 |
| INSIG2     | -0.0150292 | 9.77871E-05 |
| TMTC3      | 0.01193513 | 9.86868E-05 |
| EFCAB7     | 0.04598637 | 9.89683E-05 |
| GNPDA1     | 0.05660506 | 9.93376E-05 |
| SLFN12L    | 0.05769353 | 9.95064E-05 |
| MORF4L2-A  | 0.04800644 | 0.000101569 |
| C10orf143  | 0.02142599 | 0.00010286  |
| AC005076.1 | 0.05126147 | 0.00010391  |
| USP30-AS1  | -0.0380052 | 0.000104412 |
| ZSWIM8     | 0.0278432  | 0.000104463 |
| MEGF9      | -0.0001777 | 0.000104828 |
| TTLL5      | 0.02575175 | 0.000104936 |
| SLC24A1    | 0.05768349 | 0.000105159 |
| CCDC71     | -0.0254174 | 0.000107151 |
| THBS1      | -0.197301  | 0.000107796 |
| PRR34-AS1  | -0.0451458 | 0.000108211 |
| URB1-AS1   | -0.03572   | 0.000109165 |
| DEPDC7     | 0.02395493 | 0.000111604 |
| ASCC1      | -0.053718  | 0.000113012 |
| FRAT1      | 0.00838592 | 0.000113446 |
| UBE2E2     | -0.0010453 | 0.000114537 |
| KPNB1      | 0.06925361 | 0.000114721 |
| LINC01806  | -0.0634973 | 0.000115075 |
| SHF        | -0.065375  | 0.000115259 |
| NOP58      | 0.17414251 | 0.000115709 |
| PARP12     | -0.0161645 | 0.000116695 |
| SFPQ       | 0.16631042 | 0.000116861 |
| SIAE       | 0.0046739  | 0.000116987 |
| CYP2R1     | 0.0170135  | 0.000117011 |
| LTO1       | -0.0580261 | 0.000117211 |
| ILDR2      | 0.02481285 | 0.000118759 |

|            |            |             |
|------------|------------|-------------|
| FBXO33     | -0.0896355 | 0.000119637 |
| AC023157.3 | -0.0586915 | 0.000119922 |
| ZBTB22     | -0.0245302 | 0.000120427 |
| POGLUT3    | 0.00211206 | 0.000120587 |
| POLD1      | -0.0101199 | 0.000121234 |
| PPP1R3B    | -0.062929  | 0.000121407 |
| KCTD13     | 0.03667385 | 0.000122586 |
| SESTD1     | -0.0684086 | 0.000123131 |
| DAPK1-IT1  | -0.0572922 | 0.000123356 |
| LINC01002  | 0.02875425 | 0.000124356 |
| LRFN4      | 0.0308318  | 0.0001252   |
| CAMKK1     | -0.0931472 | 0.000126431 |
| DENND2D    | 0.03733205 | 0.00012659  |
| AC005726.5 | 0.03736608 | 0.000126798 |
| MYLIP      | 0.05928699 | 0.000127424 |
| ZNF700     | 0.02882843 | 0.000127633 |
| SYTL4      | -0.104053  | 0.000128483 |
| TMEM254    | -0.0063814 | 0.000128725 |
| CCDC15     | 0.05958369 | 0.0001291   |
| AC024075.2 | 0.04403893 | 0.000129278 |
| AL450384.2 | 0.03931341 | 0.000129328 |
| BTN2A1     | -0.0188623 | 0.000129418 |
| MED22      | -0.031901  | 0.000131206 |
| IKZF1      | -0.0773588 | 0.000131341 |
| HLA-F      | -0.0834256 | 0.000131472 |
| TEPSIN     | 0.00087191 | 0.000131694 |
| VENTX      | -0.0275791 | 0.00013193  |
| APOBEC3F   | 0.01029766 | 0.000132581 |
| SEC61A2    | -0.0839934 | 0.000132693 |
| SPHK2      | 0.04044946 | 0.000133477 |
| AC007952.4 | -0.006892  | 0.000133932 |
| APBA3      | 0.01979018 | 0.000134982 |
| ACTA2      | -0.036063  | 0.000136578 |
| LINC01122  | 0.04043383 | 0.000137546 |
| NPM2       | -0.0461676 | 0.000138107 |
| AL035071.1 | 0.01883331 | 0.000138944 |
| NACC2      | -0.0807754 | 0.000138946 |
| SMARCE1    | 0.00508654 | 0.000139095 |
| PHLDB3     | 0.00710196 | 0.000139233 |
| CRTC3      | -0.0588929 | 0.000140357 |
| HMG2       | 0.07151587 | 0.00014191  |
| RRN3       | 0.01569365 | 0.000142442 |
| ZNF619     | 0.03447432 | 0.000142443 |
| RBFADN     | 0.04679514 | 0.000143057 |
| LSM8       | 0.08327885 | 0.000143205 |
| LINC02193  | 0.02262664 | 0.000143578 |
| MT2A       | -0.2943068 | 0.000143937 |
| FBXL8      | 0.04885201 | 0.000144333 |
| ZNF143     | 0.07572661 | 0.000144406 |
| IPO11      | -0.0689489 | 0.000145327 |

|            |            |             |
|------------|------------|-------------|
| C10orf88   | 0.05510813 | 0.000146749 |
| HIST1H2AL  | 0.04376994 | 0.000147634 |
| ACOT9      | -0.0345896 | 0.000147845 |
| DEF8       | -0.0790095 | 0.000147849 |
| LRRC57     | -0.0593297 | 0.000148155 |
| FURIN      | -0.0516438 | 0.000149348 |
| EARS2      | 0.02595724 | 0.00015149  |
| TBC1D19    | -0.0076805 | 0.000152336 |
| SH3BGRL    | 0.18694126 | 0.000154588 |
| PPIG       | -0.141738  | 0.000155096 |
| ATF6       | -0.1237785 | 0.00015543  |
| PACS2      | -0.0099516 | 0.000156375 |
| WDR47      | -0.0591436 | 0.000157537 |
| AC090517.2 | 0.03080653 | 0.000159607 |
| HIRIP3     | -0.028585  | 0.000161409 |
| TSPAN14    | -0.0179794 | 0.000161985 |
| PCNX3      | -0.0015485 | 0.000162572 |
| CCSAP      | 0.01515389 | 0.000163194 |
| NAXD       | -0.01312   | 0.000163332 |
| DPH2       | 0.04572273 | 0.000164593 |
| AC079922.2 | -0.0033315 | 0.000167271 |
| PJA1       | -0.0096587 | 0.000167987 |
| FDXR       | 0.02432875 | 0.000168239 |
| FBXO32     | 0.04938058 | 0.000170014 |
| NRAV       | -0.0349281 | 0.000170478 |
| GIN1       | 0.0581127  | 0.000170794 |
| ZNF75A     | 0.02955647 | 0.000171619 |
| LRWD1      | 0.02447254 | 0.000171868 |
| HECTD1     | -0.0046988 | 0.000172674 |
| GABPB1     | -0.0897012 | 0.000172973 |
| LINC01572  | 0.03105481 | 0.000173128 |
| AC132872.1 | -0.0217714 | 0.000173882 |
| SLC22A4    | -0.0655438 | 0.00017823  |
| THBS3      | -0.0831677 | 0.000179483 |
| ZHX3       | 0.02725406 | 0.000180196 |
| PRR3       | 0.0288472  | 0.000180789 |
| CLDN15     | 0.00379705 | 0.000185624 |
| FRMD4A     | -0.0247733 | 0.000186233 |
| PFDN5      | 0.15767725 | 0.000186932 |
| ATG2B      | 0.01050842 | 0.000187462 |
| C9orf85    | 0.01656854 | 0.00018836  |
| EOGT       | 0.02262095 | 0.000188882 |
| PHIP       | -0.0345459 | 0.000189618 |
| MOV10      | -0.0541759 | 0.000191437 |
| P2RX1      | -0.0469328 | 0.000193134 |
| PANX2      | 0.02064693 | 0.000195035 |
| AC026401.3 | -0.1006358 | 0.000196226 |
| DNHD1      | 0.02771826 | 0.000196304 |
| AC024560.5 | 0.01336095 | 0.000198079 |
| ASB6       | -0.0844151 | 0.000198183 |

|            |            |             |
|------------|------------|-------------|
| ZNF71      | -0.059731  | 0.000199932 |
| RNASEH2A   | 0.035068   | 0.000200331 |
| ARHGAP10   | 0.06359886 | 0.000200848 |
| DHX58      | 0.02714787 | 0.000201054 |
| GORAB      | -0.0193872 | 0.000201172 |
| PELI1      | -0.1161923 | 0.000201615 |
| TYMP       | -0.0042937 | 0.000202817 |
| CENPBD1    | 0.02589903 | 0.000204183 |
| AL359643.3 | 0.0378091  | 0.000205954 |
| UBLCP1     | 0.05640827 | 0.000207645 |
| FOXO4      | 0.03610104 | 0.000209591 |
| RAB27B     | -0.1815952 | 0.000210247 |
| IMPDH2     | 0.11517465 | 0.000216199 |
| TIPIN      | 0.05484532 | 0.000218762 |
| AC090559.2 | -0.0022571 | 0.000220947 |
| CST3       | 0.3692186  | 0.000222472 |
| UBXN2A     | -0.0609214 | 0.000222481 |
| PCF11-AS1  | 0.01214906 | 0.000222519 |
| ARMC9      | 0.05677386 | 0.000223612 |
| LINC00683  | 0.02292248 | 0.000223659 |
| SF1        | -0.2275391 | 0.00022409  |
| RECK       | -0.0446152 | 0.000225148 |
| TMEM94     | 0.02195102 | 0.000226599 |
| LINC00653  | 0.03525602 | 0.000228476 |
| STEAP3     | 0.02438617 | 0.00022899  |
| ABCB8      | -0.0613898 | 0.000231209 |
| NKAPD1     | -0.044607  | 0.000231579 |
| GTPBP8     | -0.0292351 | 0.000232253 |
| RDH13      | -0.0449471 | 0.000232488 |
| MIR646HG   | 0.01381449 | 0.000236413 |
| PARP16     | 0.03987934 | 0.000239538 |
| DCAF4      | 0.03526593 | 0.000240003 |
| ZNF764     | -0.0086433 | 0.000240479 |
| PEX11B     | -0.0425961 | 0.000241372 |
| TRAM2-AS1  | 0.05897312 | 0.000242597 |
| AAR2       | -0.0276199 | 0.000243232 |
| ZNF282     | -0.0693372 | 0.000245504 |
| MBOAT1     | -0.0566802 | 0.000247473 |
| POLR3G     | 0.05710136 | 0.000247511 |
| NBPF10     | 0.05071349 | 0.000248623 |
| AL390195.2 | 0.03065508 | 0.000251588 |
| VAT1       | -0.0040814 | 0.000251742 |
| SLC25A51   | -0.0239409 | 0.00025177  |
| ITGAL      | -0.1563206 | 0.000251923 |
| C19orf53   | 0.03150986 | 0.000256123 |
| OTUD3      | 0.01076735 | 0.000258491 |
| ZNF552     | 0.01890784 | 0.000259746 |
| PEMT       | 0.04540417 | 0.000261885 |
| ECH1       | -0.00743   | 0.000262069 |
| SAP25      | 0.01505885 | 0.000262595 |

|            |            |             |
|------------|------------|-------------|
| DARS2      | 0.03517809 | 0.000262964 |
| BORCS8     | -0.03617   | 0.000266037 |
| IL17RC     | -0.0613058 | 0.000266059 |
| WDR35      | 0.00717995 | 0.000267481 |
| IKBKG      | -0.0514783 | 0.000273941 |
| AC008393.1 | 0.02646534 | 0.000276403 |
| UBXN1      | -0.1051729 | 0.000277251 |
| NBPF3      | 0.05220069 | 0.000280358 |
| IGSF8      | -0.0020053 | 0.000280447 |
| CIP2A      | 0.03264031 | 0.000285031 |
| AC083799.1 | -0.0380818 | 0.000285874 |
| AC068888.2 | 0.02717178 | 0.000286881 |
| ZRANB3     | 0.03724925 | 0.000288607 |
| SMPDL3B    | 0.01823738 | 0.000292129 |
| ZNF879     | 0.03047377 | 0.000292855 |
| EMC1-AS1   | 0.03140802 | 0.000294188 |
| SGSM2      | -0.0806914 | 0.000294667 |
| SPSB1      | -0.0457113 | 0.000295108 |
| ZBTB2      | -0.0749009 | 0.00029653  |
| ZNF699     | -0.0418102 | 0.000297099 |
| TRIM71     | -0.029817  | 0.000299341 |
| AL353194.1 | -0.014389  | 0.000301416 |
| RPS13      | 0.11042327 | 0.000301708 |
| NCDN       | 0.03791495 | 0.000302356 |
| AC069544.1 | 0.01695232 | 0.000303597 |
| HMGCS1     | -0.1726952 | 0.000303657 |
| AL162253.2 | 0.0347824  | 0.000306035 |
| RTP4       | 0.01112813 | 0.000311713 |
| AL133410.1 | 0.02028979 | 0.000311852 |
| LIN7B      | 0.04608101 | 0.00031334  |
| WDR76      | -0.0245572 | 0.000313629 |
| FAM110A    | -0.1012465 | 0.000314198 |
| BEND5      | 0.00035714 | 0.000314634 |
| PRSS57     | 0.15106042 | 0.000316726 |
| MSH5       | 0.00914798 | 0.00032118  |
| TTC7B      | 0.05350289 | 0.000326607 |
| NAIF1      | -0.0067644 | 0.000327603 |
| TIRAP      | 0.0112142  | 0.000330415 |
| HDGF       | 0.11192936 | 0.000333006 |
| AP002495.1 | 0.02455789 | 0.000333605 |
| EGFL8      | 0.00845104 | 0.000336095 |
| KCTD11     | 0.00979477 | 0.000337794 |
| WASF1      | 0.06467688 | 0.000341083 |
| EID2B      | 0.00357894 | 0.000343902 |
| VIPAS39    | -0.0070565 | 0.000345433 |
| BET1L      | -0.0182912 | 0.000347902 |
| AMBRA1     | -0.0808819 | 0.000349895 |
| OGFRL1     | 0.03640314 | 0.000350554 |
| ZNF35      | 0.00193207 | 0.000356469 |
| TTC9       | -0.0681322 | 0.000357213 |

|            |            |             |
|------------|------------|-------------|
| PIGW       | 0.01482609 | 0.000359776 |
| FANCG      | -0.0036792 | 0.000360955 |
| LY6G5C     | 0.01931212 | 0.000362495 |
| COA6-AS1   | -0.0154505 | 0.000364363 |
| AC103703.1 | 0.01576273 | 0.000367977 |
| PARP2      | 0.03413389 | 0.00036828  |
| IL12A      | -0.0166987 | 0.00036853  |
| HBEGF      | 0.04379215 | 0.000373489 |
| APOL3      | -0.020656  | 0.000374976 |
| HMG5       | 0.08392629 | 0.000377424 |
| GSPT1      | 0.12332899 | 0.00038148  |
| TRIM41     | -0.0249912 | 0.000383013 |
| AMER1      | 0.03486203 | 0.000383918 |
| DNAJC27    | -0.0468094 | 0.000387991 |
| MICAL2     | -0.0860444 | 0.000390153 |
| PPAT       | 0.03119354 | 0.000391001 |
| ZNF776     | 0.01671828 | 0.000391721 |
| AC069243.1 | 0.02456462 | 0.000392654 |
| DLEU2      | 0.0073459  | 0.000393359 |
| HIP1R      | -0.004197  | 0.000397929 |
| UCN        | 0.02566138 | 0.00039874  |
| AC040977.1 | 0.03209508 | 0.000401888 |
| AC006059.1 | 0.05314588 | 0.000406687 |
| MTMR1      | -0.029268  | 0.000408089 |
| CCDC122    | 0.06141725 | 0.00041232  |
| TMEM106C   | -0.0505489 | 0.000413049 |
| INO80C     | 0.03864719 | 0.00041347  |
| C18orf54   | 0.05949887 | 0.000413626 |
| PPP2R3B    | 0.02201192 | 0.000417784 |
| BEX3       | -0.0714655 | 0.000419474 |
| HSD17B1    | 0.02394695 | 0.000421699 |
| C20orf197  | 0.02311554 | 0.000422528 |
| HIST1H2BN  | 0.00667574 | 0.000423075 |
| C4orf3     | 0.07454876 | 0.00042627  |
| SLC25A42   | 0.01713961 | 0.000426989 |
| CPNE1      | -0.0006625 | 0.000430993 |
| SMURF1     | -0.104509  | 0.00043215  |
| PRDX2      | -0.0210682 | 0.000435288 |
| SEL1L3     | -0.051999  | 0.000438424 |
| ESD        | 0.12775981 | 0.000441515 |
| AFF1       | -0.0877619 | 0.00044161  |
| ZNF570     | -0.0322394 | 0.000442358 |
| RNF185     | -0.0121707 | 0.000446897 |
| CROCC      | 0.0292153  | 0.000447275 |
| WDCP       | 0.03570885 | 0.000449819 |
| ASTE1      | -0.0539328 | 0.000453192 |
| ZNF555     | 0.02353935 | 0.000457948 |
| MROH7      | 0.0309863  | 0.000458338 |
| ATP6V0B    | 0.10686241 | 0.000460234 |
| SLCO4A1    | -0.0491318 | 0.00046537  |



|            |            |             |
|------------|------------|-------------|
| UBOX5      | -0.0281714 | 0.000466996 |
| AC016394.1 | 0.02965056 | 0.00046864  |
| AC064805.2 | -0.0138213 | 0.000472086 |
| SLC35B2    | -0.0067015 | 0.000473272 |
| GKAP1      | 0.03618086 | 0.000473274 |
| AC009133.1 | 0.03058562 | 0.000473987 |
| AC004847.1 | 0.01645924 | 0.000474372 |
| TCEAL8     | 0.05014587 | 0.000479208 |
| PRAM1      | -0.082771  | 0.000487453 |
| HIST1H2AD  | 0.02702035 | 0.000488449 |
| RPL32      | 0.08889489 | 0.000488697 |
| CASTOR3    | 0.01875322 | 0.000494234 |
| FAM118B    | -0.0079503 | 0.000510052 |
| TRAM2      | 0.01312645 | 0.000511815 |
| TCEA1      | 0.06355136 | 0.000512608 |
| ZBTB47     | 0.02660013 | 0.000514439 |
| KIAA0355   | 0.02603551 | 0.00051883  |
| DNAJC1     | -0.1768092 | 0.000523358 |
| BBS9       | 0.01304843 | 0.000538399 |
| ZSCAN5A    | 0.02703201 | 0.000553859 |
| LINC01943  | -0.0125167 | 0.000554838 |
| SWAP70     | 0.06589327 | 0.00055713  |
| GEN1       | 0.05618052 | 0.000557446 |
| KMT5C      | -0.0660398 | 0.000566433 |
| ZRANB2-AS1 | 0.04747424 | 0.000576523 |
| ZNF599     | 0.02631531 | 0.000577205 |
| HIST1H2BF  | -0.0053183 | 0.000578535 |
| HOXA10-AS  | 0.09522362 | 0.000583202 |
| BARD1      | 0.01273147 | 0.000586784 |
| MORC2-AS1  | 0.04251745 | 0.000587404 |
| INCENP     | 0.02789406 | 0.000588349 |
| TWSG1      | -0.0613463 | 0.000590728 |
| MSMO1      | -0.046179  | 0.000592039 |
| DMXL2      | -0.0186063 | 0.000592091 |
| AL392172.1 | 0.0353042  | 0.000593798 |
| SP4        | -0.0021782 | 0.00060167  |
| GAS8       | -0.0054635 | 0.000602887 |
| AKT1S1     | -0.0469412 | 0.000608362 |
| TFR2       | 0.02644199 | 0.000609336 |
| AC016065.1 | -0.002405  | 0.000617999 |
| RAB29      | -0.0659573 | 0.000618342 |
| DTNB       | 0.05726243 | 0.000630238 |
| POFUT2     | -0.0950619 | 0.000631693 |
| RIC1       | 0.02029353 | 0.000631939 |
| HIVEP3     | -0.0243646 | 0.000635393 |
| TNFRSF10B  | -0.0667374 | 0.000637432 |
| NME8       | 0.02052884 | 0.000643439 |
| TMEM104    | -0.102255  | 0.000643648 |
| HMGCR      | -0.1134098 | 0.000648182 |
| AP003307.1 | -0.0127973 | 0.000648469 |

|            |            |             |
|------------|------------|-------------|
| ZNF467     | -0.0849876 | 0.000649804 |
| ZNF827     | -0.0068476 | 0.000649804 |
| BEST1      | 0.026321   | 0.000651032 |
| TMEM201    | 0.01924319 | 0.000654213 |
| POLD3      | -0.0171515 | 0.000660918 |
| PYGB       | 0.02159022 | 0.000666021 |
| PUDP       | 0.0107006  | 0.000672165 |
| RTF1       | -0.0874852 | 0.000675132 |
| LINC00894  | 0.0569026  | 0.00067519  |
| CUL7       | 0.00914114 | 0.00067927  |
| TSPAN4     | -0.043305  | 0.00068182  |
| TMEM53     | -0.0275649 | 0.000693542 |
| ZNF658     | 0.03604217 | 0.000695258 |
| ZNF154     | 0.02707087 | 0.000699828 |
| MEIS1      | -0.1281705 | 0.000700224 |
| PIK3R5     | -0.0669504 | 0.000705963 |
| E2F6       | 0.01228209 | 0.000709098 |
| PADI4      | -0.0306424 | 0.000709737 |
| MOB1A      | 0.00700049 | 0.000710292 |
| CSDE1      | -0.140413  | 0.000710456 |
| SYNJ1      | -0.0403429 | 0.000712093 |
| PIGV       | 0.02293544 | 0.000713012 |
| ACSS2      | -0.0109093 | 0.000728962 |
| ZMAT1      | -0.0135985 | 0.000736332 |
| AC011462.5 | -0.0495756 | 0.000738764 |
| EXD2       | 0.02609859 | 0.000739985 |
| COG7       | -0.0298433 | 0.000743452 |
| TTL10      | -0.0799827 | 0.000758254 |
| SPATA2     | -0.0286808 | 0.00076423  |
| NHSL2      | -0.0012978 | 0.000772316 |
| USB1       | 0.02583035 | 0.000786831 |
| MAML2      | -0.0717862 | 0.000788242 |
| AC007878.1 | 0.01235926 | 0.000790544 |
| SNX8       | -0.0680675 | 0.000794495 |
| AC068205.2 | 0.0339057  | 0.00079726  |
| KCNK5      | -0.0504519 | 0.000800433 |
| DUS2       | 0.00294001 | 0.000800952 |
| ZNF484     | 0.01310205 | 0.000804993 |
| NIPBL      | 0.04212565 | 0.000806593 |
| ARHGAP5    | -0.024789  | 0.000841849 |
| UCK1       | -0.0258769 | 0.000844972 |
| AC007066.2 | 0.04086205 | 0.00085089  |
| LYRM9      | 0.03411173 | 0.000855551 |
| LAPTM4B    | 0.07356878 | 0.000858304 |
| C8orf37    | 0.05288768 | 0.000871603 |
| TSEN54     | 0.00202086 | 0.000876931 |
| ATP5MC2    | 0.13949439 | 0.00088275  |
| MICALL2    | -0.0298346 | 0.000887659 |
| WDR24      | 0.02089039 | 0.000889806 |
| CPPED1     | -0.0576609 | 0.000898462 |

|            |            |             |
|------------|------------|-------------|
| AL096803.2 | 0.01470673 | 0.00090405  |
| AP4E1      | 0.01948226 | 0.000914201 |
| C14orf93   | 0.00956638 | 0.000914632 |
| AKAP8      | -0.0265793 | 0.000921989 |
| PPM1D      | 0.02034729 | 0.000950716 |
| TRMT61A    | 0.03940345 | 0.000951382 |
| DCLRE1A    | 0.03468519 | 0.000953088 |
| PAR6B      | 0.02241327 | 0.000964903 |
| AC092944.1 | 0.05022794 | 0.000974056 |
| AL121603.2 | -0.0077371 | 0.000988069 |
| SFXN1      | 0.0654732  | 0.001006283 |
| SLX4       | -0.0651198 | 0.001012901 |
| SLC39A13   | -0.0335489 | 0.00101467  |
| AC097382.3 | -0.0021876 | 0.001016836 |
| CRYBG1     | -0.1118554 | 0.001020111 |
| ZXDB       | -0.0055153 | 0.001020282 |
| EMSY       | 0.04612203 | 0.001026444 |
| CCDC92     | -0.0114931 | 0.0010335   |
| SLC27A2    | 0.03553487 | 0.001038374 |
| ZNF583     | -0.0100233 | 0.001065971 |
| FAM47E     | -0.0777765 | 0.001079129 |
| CHKB       | -0.0372213 | 0.001084196 |
| SMIM6      | -0.0154708 | 0.001085202 |
| AC025181.2 | -0.0501296 | 0.001093363 |
| ARNTL2     | -0.0035265 | 0.001110434 |
| ZNF839     | -0.0081779 | 0.001111088 |
| ZNF148     | -0.0223788 | 0.001126548 |
| PRPF40B    | 0.04784647 | 0.001133559 |
| CELF6      | 0.02164963 | 0.001142263 |
| TRIM16L    | 0.03018765 | 0.001142516 |
| KRTCAP2    | -0.0766992 | 0.001173202 |
| ESS2       | -0.0738492 | 0.001189149 |
| PCM1       | 0.07826577 | 0.001200844 |
| C3AR1      | -0.0396302 | 0.001214393 |
| SLC49A4    | 0.00668597 | 0.001217575 |
| ZNF280B    | 0.04926914 | 0.001232078 |
| FAM126B    | -0.0941725 | 0.00123999  |
| ZNF749     | -0.0008753 | 0.001241845 |
| ZNF554     | 0.02928689 | 0.001249203 |
| ZNF175     | 0.03183137 | 0.001251146 |
| AL355336.1 | 0.02736535 | 0.001252508 |
| CDC42-IT1  | 0.01845892 | 0.001256994 |
| MFSD9      | 0.00289838 | 0.001260139 |
| AP000873.2 | 0.01212235 | 0.001269381 |
| DVL1       | 0.02574636 | 0.001273892 |
| ZNF461     | 0.0095048  | 0.001279623 |
| DYRK2      | -0.0343081 | 0.00128191  |
| HOXB3      | 0.01642948 | 0.001298226 |
| REST       | -0.0052735 | 0.001321436 |
| ARRDC1-AS  | -0.0186158 | 0.001325161 |

|            |            |             |
|------------|------------|-------------|
| MAPK8IP3   | -0.0651676 | 0.001356263 |
| RPL4       | -0.23642   | 0.001360694 |
| MARCKS     | -0.1758711 | 0.001360994 |
| CDYL2      | -0.0295735 | 0.001374121 |
| ANKMY1     | 0.03753738 | 0.001381255 |
| TPI1       | -0.0088981 | 0.001389105 |
| ZNF624     | -0.0079462 | 0.001406315 |
| PROM1      | 0.16848861 | 0.001410351 |
| SEC22A     | -0.0321831 | 0.001414722 |
| SH2B1      | 0.00012814 | 0.001420295 |
| SRRM2      | 0.0984454  | 0.001430729 |
| AC026124.2 | -0.0245134 | 0.001437699 |
| MYH9       | 0.06057897 | 0.001438571 |
| USP5       | 0.04806352 | 0.0014515   |
| RHOBTB1    | -0.0281825 | 0.001452231 |
| OLIG1      | -0.0145298 | 0.001453856 |
| AL592295.5 | 0.01687288 | 0.001462519 |
| YTHDC2     | -0.025024  | 0.001490531 |
| ELAC1      | 0.02045221 | 0.001492415 |
| MYO5C      | -0.0835179 | 0.001494086 |
| POLA1      | 0.0546698  | 0.001499568 |
| TNRC6C     | 0.04129974 | 0.001504964 |
| SRSF2      | -0.1201134 | 0.001506435 |
| CCDC146    | 0.0268424  | 0.001513353 |
| AC010969.2 | 0.00622493 | 0.001520487 |
| CDCA7      | -0.0195431 | 0.001527869 |
| ACOT4      | 0.02365288 | 0.001554883 |
| ZKSCAN2    | 0.00661905 | 0.001588225 |
| ETV5       | -0.0536361 | 0.001596858 |
| CD48       | -0.0720253 | 0.001620837 |
| ATP8B3     | 0.04109207 | 0.001620892 |
| TMEM217    | -0.0996439 | 0.001629415 |
| POLA2      | 0.0053668  | 0.001645357 |
| PYCARD-AS  | -0.0490174 | 0.00165739  |
| YWHAE      | 0.15152164 | 0.001657721 |
| PLEKHG4    | 0.03507252 | 0.00166423  |
| OTUD1      | 0.0178588  | 0.001666627 |
| WDR4       | 0.01129534 | 0.001675445 |
| UXT        | 0.11627867 | 0.001677267 |
| DSN1       | 0.00525508 | 0.00171557  |
| SLFN13     | 0.02442046 | 0.00172321  |
| CPB2-AS1   | 0.02984699 | 0.00173434  |
| PRKAB2     | -0.0245576 | 0.001742611 |
| DIABLO     | 0.05142978 | 0.001763785 |
| WDR31      | 0.02782607 | 0.0017677   |
| TCP11L1    | 0.01518935 | 0.001774839 |
| DOLK       | 0.00743975 | 0.001796155 |
| AC048341.1 | -0.0025186 | 0.001813654 |
| RBMS2      | -0.0330713 | 0.001814409 |
| AC009113.1 | 0.01556753 | 0.001820707 |

|            |            |             |
|------------|------------|-------------|
| ARL13B     | -0.0548572 | 0.001835719 |
| HBD        | -0.039624  | 0.001839991 |
| EIF4G2     | 0.04571099 | 0.001860429 |
| GRIK5      | -0.0480893 | 0.001874799 |
| PNRC2      | -0.0795785 | 0.001898729 |
| DGAT1      | 0.03427085 | 0.001906466 |
| APPL1      | -0.0600972 | 0.00191836  |
| RNF139-AS1 | -0.0095063 | 0.00192633  |
| AC141424.1 | 0.01251087 | 0.001952216 |
| LINC00513  | -0.0748232 | 0.001962705 |
| C1orf54    | -0.0469781 | 0.0019746   |
| FBXL13     | 0.02317527 | 0.001976861 |
| SSB        | 0.15334747 | 0.001995076 |
| TIGD7      | 0.03688153 | 0.002042964 |
| ZNF440     | 0.0384904  | 0.002044771 |
| SCAF11     | 0.0986403  | 0.002045972 |
| MINDY1     | -0.0965802 | 0.002047075 |
| SEPTIN7    | -0.057004  | 0.002075895 |
| IPO13      | 0.02126086 | 0.002085177 |
| LETM2      | -0.0996351 | 0.002089664 |
| FAU        | -0.1163487 | 0.002090792 |
| ITPKC      | -0.053247  | 0.002105404 |
| PGM3       | 0.03972794 | 0.002108164 |
| AC105339.6 | 0.03341272 | 0.002121759 |
| CHST7      | -0.0702726 | 0.002140703 |
| ZFP1       | -0.0501264 | 0.002177168 |
| ZNF837     | 0.0044375  | 0.002195392 |
| C8orf82    | 0.03270171 | 0.002204485 |
| ASL        | -0.0492142 | 0.002205387 |
| LINC01515  | 0.0423881  | 0.002209078 |
| LINC00528  | 0.00726669 | 0.002261598 |
| RAPGEF2    | -0.0844913 | 0.002271523 |
| RTL8A      | -0.0040113 | 0.002294994 |
| BBS1       | -0.0066641 | 0.002314027 |
| C2orf92    | -0.0448116 | 0.002318843 |
| METTL2A    | 0.03010688 | 0.002358714 |
| CBR3-AS1   | 0.06610385 | 0.002362059 |
| RAB11FIP4  | -0.0852619 | 0.002372302 |
| AL035446.1 | -0.1249753 | 0.002390321 |
| TAPT1-AS1  | 0.01579523 | 0.002394017 |
| GK         | 0.00512501 | 0.002397216 |
| NDUFC1     | 0.08009359 | 0.002401506 |
| NAPB       | -0.0357698 | 0.002418522 |
| LMF1       | 0.04346925 | 0.0024338   |
| COMT       | 0.08522666 | 0.002453569 |
| SRP14      | -0.1717555 | 0.00249213  |
| ZWILCH     | 0.01815826 | 0.002492242 |
| UGCG       | 0.01892983 | 0.002508007 |
| ABAT       | 0.01970169 | 0.00253414  |
| EXOC3-AS1  | 0.03572231 | 0.00253876  |

|            |            |             |
|------------|------------|-------------|
| HSF2       | -0.0458885 | 0.002539374 |
| TBCEL      | 0.02241398 | 0.002627597 |
| SPINDOC    | -0.0132901 | 0.002630654 |
| IL11RA     | 0.04240216 | 0.002663004 |
| C9orf40    | 0.02538806 | 0.002691971 |
| AP4M1      | -0.0134218 | 0.00273718  |
| ZSCAN25    | 0.03561948 | 0.00275835  |
| F2R        | -0.1441728 | 0.002901397 |
| SH3GLB1    | -0.1378078 | 0.002940106 |
| AL121652.1 | 0.02762609 | 0.002949852 |
| AVEN       | 0.05801328 | 0.002999553 |
| GRAP       | -0.0576301 | 0.00301908  |
| RASA1      | 0.012969   | 0.003035638 |
| TAX1BP1    | 0.09395597 | 0.003042217 |
| AIF1L      | -0.1430909 | 0.003043672 |
| AL078587.2 | 0.02531725 | 0.003045804 |
| SLC25A22   | 0.01741374 | 0.003126556 |
| HSPA8      | 0.20190829 | 0.003150231 |
| CAMK1D     | -0.1318798 | 0.00316407  |
| MPZL3      | -0.0738752 | 0.003183084 |
| LSS        | -0.0081673 | 0.003191396 |
| ZSCAN2     | -0.0057655 | 0.003209765 |
| AC006449.6 | 0.01074265 | 0.003231629 |
| AC021016.2 | 0.02525143 | 0.003235345 |
| VPS35      | -0.0662372 | 0.003254435 |
| TPCN2      | -0.0285829 | 0.003304034 |
| PRR5       | -0.0544992 | 0.003307455 |
| STAR       | 0.02191146 | 0.003315039 |
| SMCR5      | -0.1054124 | 0.003340092 |
| TARBP2     | 0.03087121 | 0.003341173 |
| PRDM4      | -0.017146  | 0.003393128 |
| EPS8L2     | 0.02040547 | 0.003397583 |
| SRGAP2C    | 0.03574021 | 0.003399293 |
| KNSTRN     | 0.01823133 | 0.003402259 |
| USP40      | 0.0418311  | 0.003430547 |
| TSTD2      | 0.00859863 | 0.00344988  |
| FAM126A    | 0.02096125 | 0.003470935 |
| CPSF6      | 0.01703939 | 0.003475918 |
| ZNF777     | -0.0137791 | 0.003489531 |
| CCDC186    | -0.0935073 | 0.003508831 |
| ZNF81      | 0.02012938 | 0.00353671  |
| AL080250.1 | 0.04678131 | 0.003538249 |
| ZNF213     | -0.009565  | 0.003544647 |
| MIF        | -0.2357454 | 0.00355045  |
| GCHFR      | 0.00087157 | 0.003554549 |
| AC004241.1 | -0.0407996 | 0.003584705 |
| TRAF2      | -0.0441754 | 0.003610922 |
| AC016949.1 | -0.0364575 | 0.003687361 |
| MTBP       | 0.02969354 | 0.003687415 |
| SERPINF2   | 0.02181973 | 0.003767108 |

|            |            |             |
|------------|------------|-------------|
| TM9SF3     | -0.0031023 | 0.003796059 |
| CDC7       | 0.02443446 | 0.003898675 |
| ZNF18      | -0.0080937 | 0.003947868 |
| FKBPL      | -0.0261352 | 0.003951287 |
| ZNF626     | 0.04129125 | 0.003997827 |
| ZNF319     | -0.0219129 | 0.004189068 |
| LINC00630  | 0.00606807 | 0.0042675   |
| SYPL1      | 0.09285314 | 0.004275396 |
| EMC9       | -0.0027949 | 0.004287523 |
| RRAS       | -0.0640548 | 0.004397662 |
| LINC01176  | 0.03915595 | 0.004416928 |
| AC127035.1 | 0.03053033 | 0.004423229 |
| SH3BP5-AS1 | 0.02659316 | 0.004499235 |
| MED26      | -0.0367825 | 0.004501195 |
| MCM8       | 0.03041338 | 0.004515713 |
| HSD11B1L   | 0.02731161 | 0.004529834 |
| HSP90AA1   | -0.2574514 | 0.004567346 |
| TMEM25     | -0.0483158 | 0.004639351 |
| TRAPPC1    | -0.0018528 | 0.004669477 |
| JMJD4      | -0.021173  | 0.004674368 |
| CLSPN      | -0.1176304 | 0.004686015 |
| IPO4       | 0.0036818  | 0.004739871 |
| FAM185A    | 0.01255373 | 0.004809564 |
| DLG4       | -0.0511559 | 0.004810882 |
| ZNF846     | 0.03197696 | 0.004886297 |
| PRMT6      | 0.00904266 | 0.00489382  |
| NUMBL      | -0.059583  | 0.00493008  |
| KIAA0513   | 0.00810462 | 0.004964401 |
| RPAP1      | 0.05778424 | 0.004979374 |
| DHRS13     | 0.01499395 | 0.004998416 |
| TIAM2      | 0.03836306 | 0.005022973 |
| PTPA       | -0.0271466 | 0.00502761  |
| LINC01473  | 0.0310156  | 0.005102751 |
| TBL1X      | -0.0046932 | 0.005130804 |
| AL135999.1 | 0.00379239 | 0.005244392 |
| NXF1       | -0.0009839 | 0.005270509 |
| ZNF670     | 0.0349749  | 0.005302366 |
| MPP7       | -0.0895093 | 0.005355419 |
| TRG-AS1    | -0.2271891 | 0.00536216  |
| SRSF8      | 0.04371551 | 0.005393588 |
| OXCT1      | -0.0881637 | 0.005459226 |
| SLC4A5     | 0.02345734 | 0.005461868 |
| ZNF77      | 0.01702358 | 0.005462344 |
| ZCCHC14    | 0.00259592 | 0.005468847 |
| HOXA9      | 0.22001917 | 0.005505731 |
| APOO       | -0.0026793 | 0.005672394 |
| RHBDF1     | -0.0844334 | 0.005821145 |
| CXCL2      | -0.0540547 | 0.005866122 |
| BTN2A2     | 0.00394889 | 0.005884616 |
| IL10RB-DT  | 0.02137004 | 0.005918541 |

|            |            |             |
|------------|------------|-------------|
| MBNL1-AS1  | -0.007362  | 0.005953892 |
| C8orf58    | -0.0507505 | 0.005978849 |
| BST2       | -0.1279967 | 0.006079571 |
| CBX2       | 0.01456732 | 0.0061417   |
| HRH2       | 0.008087   | 0.006315804 |
| ZNF470     | 0.02136854 | 0.006316526 |
| AC253572.2 | -0.0717165 | 0.006460074 |
| CA13       | 0.00148313 | 0.006519078 |
| SPRYD3     | -0.0416349 | 0.006545734 |
| FBXW9      | -0.0179812 | 0.006613605 |
| ZBTB11-AS1 | -0.0122125 | 0.006670193 |
| SBF2       | -0.0093609 | 0.006696778 |
| RTN4IP1    | 0.01242376 | 0.006957179 |
| PIGA       | -0.0218581 | 0.006998062 |
| RMND5B     | -0.0233288 | 0.00701266  |
| GSTM5      | -0.007224  | 0.007146528 |
| NENF       | -0.0035611 | 0.007235741 |
| MYCBPAP    | 0.02480564 | 0.007319336 |
| CRYBG3     | 0.05171818 | 0.00737926  |
| CTTNBP2NL  | -0.0739261 | 0.00747256  |
| KANSL1-AS1 | 0.02098071 | 0.007478763 |
| ARIH2OS    | 0.0210503  | 0.007482622 |
| NANOS3     | -0.0414586 | 0.007491528 |
| TOM1L1     | -0.0147439 | 0.007514002 |
| ZBED3-AS1  | 0.0389477  | 0.007536994 |
| INTU       | 0.0489349  | 0.007758659 |
| HDAC4-AS1  | -0.0169305 | 0.00776342  |
| ZNF275     | -0.059648  | 0.007764193 |
| ATP5F1A    | 0.135779   | 0.00783028  |
| ZNF674     | 0.02129189 | 0.007845997 |
| MFAP3      | 0.01000583 | 0.007910078 |
| ACBD4      | 0.01975195 | 0.007994082 |
| LCP1       | -0.1535172 | 0.008118456 |
| SLC7A5     | -0.1257197 | 0.00813786  |
| TBCD       | 0.01086057 | 0.008155415 |
| MCU        | 0.02785376 | 0.008175552 |
| S100Z      | 0.0189372  | 0.008258125 |
| NLRP3      | -0.0524305 | 0.008272693 |
| MIR3936HG  | 0.02072362 | 0.008294779 |
| SLC31A1    | -0.0342005 | 0.008354966 |
| AREL1      | -0.0329583 | 0.008405608 |
| EDF1       | -0.0826832 | 0.008440224 |
| BAHD1      | -0.046642  | 0.008495458 |
| EIF4B      | -0.0146374 | 0.008526492 |
| CHN2       | 0.01190993 | 0.008565704 |
| SUSD3      | 0.01758454 | 0.008595764 |
| AC008074.2 | 0.00228593 | 0.008613359 |
| ZDHC16     | 0.0122332  | 0.008678162 |
| AP1S3      | -0.0584745 | 0.00880016  |
| SARS2      | -0.0111284 | 0.008805201 |



|            |            |             |
|------------|------------|-------------|
| SPAG16     | 0.02569227 | 0.008918503 |
| ANXA7      | -0.0279751 | 0.009234022 |
| BRD3OS     | 0.00443556 | 0.009248219 |
| ZBTB18     | -0.0084056 | 0.009312181 |
| SBNO1-AS1  | -0.0302236 | 0.009378942 |
| HHLA3      | 0.02115707 | 0.009408788 |
| CDAN1      | 0.0156358  | 0.009527888 |
| IGFBP6     | -0.1010554 | 0.009792351 |
| AL355001.2 | -0.0015892 | 0.009826219 |
| LAMTOR4    | 0.12808484 | 0.009854233 |
| ZNF34      | 0.00576378 | 0.009973729 |
| VWA1       | -0.0861065 | 0.009986832 |
| FBXO21     | -0.0717065 | 0.010280529 |
| PIDD1      | -0.0406063 | 0.010398932 |
| FXR1       | 0.07368216 | 0.010511571 |
| BRPF3      | 0.02432424 | 0.010552879 |
| TRIM52-AS1 | -0.0230254 | 0.010668027 |
| FNBP1      | 0.01688731 | 0.010733003 |
| SSR2       | -0.0710281 | 0.010857934 |
| SNHG11     | -0.006078  | 0.010945679 |
| ZW10       | 0.00804463 | 0.011127373 |
| DNAJC17    | -0.0141855 | 0.011171941 |
| FIZ1       | -0.0092736 | 0.011178748 |
| TBC1D10A   | -0.0652044 | 0.011254095 |
| SULT1C4    | 0.01064257 | 0.011391517 |
| PIGO       | -0.0015631 | 0.011476963 |
| RECQL5     | 0.04539839 | 0.011486271 |
| C3orf35    | 0.02698063 | 0.01149579  |
| AC147651.4 | -0.0565487 | 0.011554162 |
| GNAS       | -0.1736728 | 0.011606802 |
| FMO5       | 0.01792636 | 0.011782723 |
| QSOX2      | -1.843E-05 | 0.01178564  |
| ITGB7      | -0.0948526 | 0.011820645 |
| LINC02021  | 0.0300103  | 0.011830253 |
| SERF1A     | 0.02665486 | 0.011891449 |
| GINS2      | -0.0739869 | 0.011956483 |
| NKIRAS1    | 0.0163284  | 0.012016319 |
| SLC25A44   | -0.03603   | 0.012161253 |
| CCDC191    | -0.0083817 | 0.012221459 |
| CTSG       | 0.08806393 | 0.012305673 |
| MOB3C      | -0.0395402 | 0.012345603 |
| SYNCRIP    | 0.01781491 | 0.012436991 |
| AL365272.1 | -0.0120002 | 0.012451663 |
| HIST1H2BK  | 0.02730957 | 0.012495724 |
| CIDEB      | -0.0120975 | 0.012501964 |
| NAA80      | 0.04478577 | 0.012634405 |
| AC007390.2 | 0.0334506  | 0.012637888 |
| SEPSECS    | 0.042118   | 0.013034385 |
| WDHD1      | 0.03688954 | 0.013141324 |
| CACTIN     | 0.00536328 | 0.01332588  |

|            |            |             |
|------------|------------|-------------|
| MT1F       | -0.0562164 | 0.013491527 |
| AL442125.1 | -0.0223504 | 0.013511376 |
| IQCK       | 0.00272986 | 0.013551397 |
| AP4S1      | -0.0625084 | 0.01393197  |
| AC018647.2 | 0.02998644 | 0.014053955 |
| NDUFB11    | -0.0380862 | 0.014178678 |
| SC5D       | 0.00453185 | 0.014446627 |
| ZNF25      | 0.04105219 | 0.014454071 |
| LANCL2     | -0.0515777 | 0.014497064 |
| IFT140     | 0.03364501 | 0.014538111 |
| EXO5       | -0.0071753 | 0.014654721 |
| FAM204A    | 0.02878146 | 0.014963344 |
| HSPA1B     | -0.052891  | 0.015095865 |
| HEATR6     | 0.01409496 | 0.015156895 |
| PGLS       | -0.1090405 | 0.015232524 |
| OAS3       | -0.0540395 | 0.01524413  |
| CAMSAP1    | 0.02737997 | 0.015416448 |
| AEN        | -0.0138271 | 0.015422295 |
| WSB2       | -0.008316  | 0.015538181 |
| TRBVB      | -0.0440659 | 0.015632148 |
| ANP32A     | 0.06836807 | 0.015719913 |
| MMAA       | 0.01243764 | 0.015756833 |
| RPS4X      | -0.1341316 | 0.015807061 |
| MAP3K14    | -0.064841  | 0.015990711 |
| TMCO4      | 0.03011112 | 0.016031241 |
| CRELD1     | 0.00381802 | 0.016046232 |
| OR2L2      | 0.031656   | 0.016272984 |
| VDAC2      | 0.11086491 | 0.016438508 |
| GOLGB1     | -0.0133064 | 0.01653688  |
| EML2-AS1   | 0.02967791 | 0.016595091 |
| SLC25A35   | 0.02099346 | 0.016784379 |
| BNIP3      | 0.04732907 | 0.017101122 |
| C7orf25    | -0.000356  | 0.017409294 |
| SLC5A10    | -0.0388383 | 0.017630024 |
| NUDT8      | -0.0357533 | 0.017630771 |
| RAB9B      | 0.03971817 | 0.01779063  |
| ZFYVE16    | 0.01997568 | 0.017856376 |
| ZNF17      | 0.00902087 | 0.017934413 |
| NAPA-AS1   | -0.0246937 | 0.018218466 |
| AL033543.1 | -0.0761991 | 0.018252697 |
| KAT2B      | -0.0229773 | 0.018269776 |
| NR2C2AP    | 0.02667578 | 0.018578611 |
| ARHGAP12   | 0.00804499 | 0.019020308 |
| PNN        | 0.15411016 | 0.019156801 |
| AL662844.4 | -0.0050106 | 0.019276587 |
| CSTF2      | -0.0007017 | 0.019308995 |
| ZFP30      | 0.01307821 | 0.0200634   |
| AC008035.1 | 0.03179864 | 0.020066059 |
| DEPDC1B    | 0.02673548 | 0.020333244 |
| POGLUT2    | 0.00305545 | 0.020361497 |

|            |            |             |
|------------|------------|-------------|
| MED20      | -0.0137864 | 0.020664335 |
| ZCCHC4     | 0.01537348 | 0.020779577 |
| YJEFN3     | 0.0058537  | 0.020902938 |
| SPCS1      | -0.0959848 | 0.021181684 |
| ST3GAL5    | -0.0979528 | 0.021486448 |
| USP30      | -0.0449782 | 0.021588741 |
| TMEM263    | -0.0106009 | 0.021918387 |
| HOXB5      | -0.079757  | 0.022001285 |
| ZNF772     | 0.01194541 | 0.022389149 |
| SLC27A3    | -0.0062597 | 0.022405425 |
| C1orf112   | 0.02348247 | 0.022551597 |
| MX1        | 0.03003088 | 0.022647043 |
| SPATA7     | 0.01304155 | 0.022755122 |
| AL645728.1 | 0.02578247 | 0.02299933  |
| BUB1B      | 0.00150419 | 0.023112033 |
| AC133550.3 | 0.0315816  | 0.023276151 |
| SORBS3     | -0.0807792 | 0.023497496 |
| SARM1      | 0.03620497 | 0.023984263 |
| LRRC45     | 0.00518315 | 0.023988408 |
| B2M        | -0.1679842 | 0.023998138 |
| MPO        | -0.2437788 | 0.024332776 |
| HHEX       | 0.02267112 | 0.024610811 |
| KIF3B      | -0.036573  | 0.024612938 |
| ZNF674-AS1 | -0.0032787 | 0.024635857 |
| NAT1       | 0.01232569 | 0.024751339 |
| NKTR       | -0.0659016 | 0.024791935 |
| ARRDC3-AS  | 0.03537632 | 0.024800547 |
| CHEK1      | -0.0742154 | 0.024865255 |
| ZBTB45     | -0.0480315 | 0.025158691 |
| OCRL       | -0.0087725 | 0.025873474 |
| STARD8     | -0.0681304 | 0.025974822 |
| BTRC       | 0.01049221 | 0.026085351 |
| MMP25-AS1  | 0.01098348 | 0.026194612 |
| PSD4       | 0.03249356 | 0.026893978 |
| MLH1       | -0.0319239 | 0.027460714 |
| A2M-AS1    | 0.01631822 | 0.027485878 |
| ALG1L2     | 0.03863045 | 0.027507817 |
| CALML4     | 0.01051224 | 0.027535953 |
| FNIP2      | -0.0838829 | 0.027806838 |
| TBC1D22B   | -0.0244288 | 0.028026844 |
| AC020910.5 | 0.02657998 | 0.028162826 |
| C2CD2L     | -0.0587834 | 0.028240333 |
| BPHL       | 0.01484375 | 0.028530891 |
| HIST1H2BG  | -0.1003024 | 0.028651536 |
| TET2       | -0.0250396 | 0.029472055 |
| MRPL53     | 0.03852919 | 0.029602231 |
| ZNF726     | -0.021155  | 0.029607516 |
| LXN        | 0.15536834 | 0.030077596 |
| TTYH2      | 0.00881263 | 0.030991641 |
| AGAP3      | -0.0675406 | 0.031035011 |

|            |            |             |
|------------|------------|-------------|
| SH3BP4     | -0.0378071 | 0.03127147  |
| ARHGEF17   | -0.0650426 | 0.031430788 |
| TMEM62     | -0.0014998 | 0.031513196 |
| TIPARP-AS1 | 0.01538071 | 0.032151206 |
| GRB2       | 0.08713825 | 0.033127794 |
| RUBCN      | 0.01328363 | 0.033164372 |
| AP3M2      | -0.0165473 | 0.03415351  |
| HNRNPC     | 0.10052574 | 0.03457462  |
| MYCNOS     | 0.02048308 | 0.034911293 |
| ARFGAP1    | -0.047005  | 0.035293506 |
| HVCN1      | -0.0320783 | 0.035344816 |
| ITM2A      | -0.1360218 | 0.035927757 |
| REPS2      | 0.0178286  | 0.036304165 |
| C12orf49   | 0.01798012 | 0.037224688 |
| ERN1       | -0.0305263 | 0.037388125 |
| AC020656.1 | 0.10986849 | 0.037702807 |
| ZNF235     | 0.02687206 | 0.037861778 |
| ENPP4      | 0.00571653 | 0.037880978 |
| ALG12      | 0.02070369 | 0.038180984 |
| KIF13B     | -0.0132642 | 0.038349046 |
| ZNF200     | 0.01504945 | 0.03868007  |
| ZFP36L2    | 0.16494797 | 0.038923594 |
| SLC12A9    | -0.0739913 | 0.039977124 |
| ATP5PO     | -0.0103913 | 0.040038323 |
| APEX2      | -0.0039455 | 0.040165296 |
| AC093525.6 | -0.0244359 | 0.040227142 |
| SOCS2-AS1  | -0.007245  | 0.040455781 |
| SNRPF      | 0.10788319 | 0.04054818  |
| AP001816.1 | -0.0656605 | 0.0406414   |
| RMI2       | -0.0464718 | 0.041390325 |
| FYN        | -0.0526151 | 0.041520473 |
| HNRNPU     | -0.2458393 | 0.042860967 |
| ELN        | -0.1092611 | 0.043100399 |
| ATP5IF1    | -0.05896   | 0.043157747 |
| ZNF778     | 0.0242491  | 0.043494466 |
| JADE3      | 0.00817239 | 0.04352883  |
| ASAP2      | -0.0033179 | 0.043617892 |
| DOHH       | -0.0319325 | 0.044866618 |
| AC090517.5 | 0.02473339 | 0.046083973 |
| GBP5       | 0.02210355 | 0.046180517 |
| PPP1R12C   | -0.0213379 | 0.04627666  |
| COX6A1     | -0.1603081 | 0.046405938 |
| GSTM3      | 0.03055974 | 0.046490796 |
| DNA2       | 0.02327188 | 0.046528184 |
| TBC1D25    | -0.0298402 | 0.046684665 |
| TBC1D14    | -0.001118  | 0.047103316 |
| NEK8       | -0.0220102 | 0.04772889  |
| POLR3F     | -0.036812  | 0.047784112 |
| DPCD       | -0.0523077 | 0.049570944 |
| TRIT1      | -0.0237352 | 0.049637763 |

|            |            |             |
|------------|------------|-------------|
| FCHSD1     | -0.0289263 | 0.051257043 |
| VNN1       | -0.0959303 | 0.051774151 |
| C11orf24   | -0.081132  | 0.051884472 |
| LINC01137  | 0.00851053 | 0.051974422 |
| ARMCX1     | -0.0760443 | 0.053132814 |
| AP001059.2 | -0.0338058 | 0.053324238 |
| NDUFS5     | -0.0645934 | 0.053359706 |
| ZBTB3      | -0.000399  | 0.053669161 |
| KDELR1     | 0.05820785 | 0.053682981 |
| INAFM1     | -0.037751  | 0.053728583 |
| NKD1       | 0.05490397 | 0.053923264 |
| TCTA       | -0.0545153 | 0.054146148 |
| PDZD11     | 0.00627322 | 0.054454307 |
| CCSER1     | 0.05763423 | 0.055151127 |
| KHDRBS1    | -0.106943  | 0.055335615 |
| IQSEC3     | 0.02306226 | 0.055436598 |
| MIGA2      | -0.0019739 | 0.056449257 |
| ATPAF1     | -0.0070079 | 0.056904068 |
| HIST1H1D   | 0.2760215  | 0.057207659 |
| MIR1-1HG-A | 0.00498058 | 0.057948699 |
| CDPF1      | 0.00268763 | 0.058758068 |
| AP001505.1 | 0.03439951 | 0.059100759 |
| AC109460.2 | 0.01993581 | 0.060889798 |
| INTS9      | 0.04014145 | 0.062132212 |
| AC007114.1 | 0.04531198 | 0.062242452 |
| DUSP28     | 0.00418836 | 0.063843078 |
| SLC25A53   | -0.0105931 | 0.064286731 |
| HYLS1      | 0.06028937 | 0.064622082 |
| CTC1       | -0.0336197 | 0.064781569 |
| PSMC3IP    | -0.0788768 | 0.06521745  |
| AC020658.5 | -0.0018561 | 0.065544608 |
| RPL13      | -0.1269127 | 0.066239443 |
| LZTR1      | -0.0015547 | 0.070628805 |
| CLP1       | -0.0082812 | 0.071063686 |
| SRR        | 0.02117498 | 0.071669219 |
| CYSLTR2    | -0.1239695 | 0.07182238  |
| AL022162.1 | 0.02061086 | 0.072066443 |
| FAM189B    | -0.0063696 | 0.072205625 |
| LINC00173  | -0.0300898 | 0.072214698 |
| SP2        | -0.0472054 | 0.072511693 |
| SBF2-AS1   | 0.02870246 | 0.072868295 |
| ATP6V1E2   | 0.03156591 | 0.072877729 |
| PRKAR1B    | 0.03826647 | 0.073006538 |
| AP5S1      | -0.0325114 | 0.073193486 |
| C17orf75   | -0.0066306 | 0.073318377 |
| FAM107B    | 0.12330073 | 0.073536035 |
| TMEM241    | 0.02627962 | 0.07373876  |
| PSKH1      | -0.0516264 | 0.074685171 |
| FBXO8      | -0.0350406 | 0.076010598 |
| AC005332.3 | 0.03029175 | 0.076671906 |

|            |            |             |
|------------|------------|-------------|
| LAMTOR5    | -0.0821261 | 0.076920788 |
| SLC25A14   | -0.0327102 | 0.077640664 |
| ATP5MC3    | -0.1513589 | 0.078030458 |
| ATP5MD     | 0.0771542  | 0.078047251 |
| BRCA2      | -0.0829334 | 0.078504316 |
| CNPY4      | 0.01166875 | 0.079626612 |
| AL136038.5 | 0.03465854 | 0.079968769 |
| ZBTB7B     | 0.01084273 | 0.080130198 |
| S100A13    | -0.0715318 | 0.08030092  |
| TMBIM6     | -0.0290024 | 0.082497595 |
| GPR137     | -0.032378  | 0.082597419 |
| MFSD13A    | 0.0278412  | 0.082953139 |
| RAB24      | 0.01084985 | 0.083411812 |
| KLC2       | -0.0536976 | 0.085604745 |
| RALBP1     | -0.0800079 | 0.087426743 |
| ZNF792     | -0.00154   | 0.087978172 |
| AC092428.1 | -0.0553886 | 0.088179951 |
| PHF3       | -0.0092392 | 0.088816924 |
| NAA16      | 0.00723684 | 0.089502355 |
| SLA        | 0.04845824 | 0.090388543 |
| CD200      | 0.00326192 | 0.091427093 |
| TRIP6      | -0.0281534 | 0.09148792  |
| OSBPL11    | -0.0673773 | 0.092259767 |
| DAPK3      | -0.0238374 | 0.092761767 |
| MMD        | 0.01748736 | 0.092989909 |
| YPEL1      | 0.03418589 | 0.093981769 |
| USP51      | 0.0454644  | 0.093998408 |
| AIFM2      | 0.01112919 | 0.094002121 |
| RPS3       | -0.1505244 | 0.094303891 |
| CNNM4      | -0.0107622 | 0.095424259 |
| MRPL18     | -0.035601  | 0.097761684 |
| FLT3LG     | -0.0242554 | 0.099738963 |
| TNRC6C-AS  | -0.0036455 | 0.099878028 |
| NCAPH2     | -0.0282373 | 0.10013407  |
| GALE       | -0.0544861 | 0.100204565 |
| UBTD1      | -0.0617182 | 0.100919898 |
| MEAK7      | -0.0247322 | 0.101340174 |
| ATG9A      | -0.0514241 | 0.10161207  |
| RPS23      | 0.05748097 | 0.102912438 |
| LINC00294  | -0.0085533 | 0.103690367 |
| MLKL       | -0.0766463 | 0.10408055  |
| TNFRSF10A  | -0.0695615 | 0.104411266 |
| LTK        | -0.07655   | 0.10518796  |
| SRGAP2B    | 0.00953187 | 0.10540032  |
| Z95331.1   | -0.039475  | 0.10644855  |
| VAMP1      | -0.0545983 | 0.106881357 |
| IFT46      | -0.0054632 | 0.108072715 |
| SULF2      | -0.058763  | 0.108097    |
| RPL27A     | 0.07853261 | 0.108798814 |
| ZBTB17     | -0.0459041 | 0.109093999 |

|            |            |             |
|------------|------------|-------------|
| PLB1       | -0.0532679 | 0.109507129 |
| SELENOH    | 0.14559091 | 0.110498554 |
| LINC01006  | 0.02847042 | 0.110697405 |
| ATP6V0A1   | 0.00291106 | 0.111757027 |
| HERC6      | 0.02759766 | 0.11344849  |
| PRDM15     | 0.02402082 | 0.114219397 |
| MMP28      | -0.0576375 | 0.115203318 |
| SLC27A4    | 0.03357584 | 0.115555278 |
| BGLAP      | -0.0259024 | 0.11719286  |
| TENT4A     | -0.0241036 | 0.118198211 |
| CCL23      | -0.0159671 | 0.120553662 |
| AC114980.1 | -0.0262502 | 0.122971084 |
| STK32B     | 0.0351719  | 0.126056264 |
| CD180      | -0.0739144 | 0.126827175 |
| RNF217-AS1 | 0.022691   | 0.129242601 |
| MON1A      | 0.01285167 | 0.129926991 |
| SSBP1      | 0.07277853 | 0.131374498 |
| COX7B      | 0.06279901 | 0.131492936 |
| AP002381.2 | -0.0017319 | 0.134876578 |
| AC010359.3 | -0.0499049 | 0.135501582 |
| DYNLL1     | -0.0302439 | 0.136847721 |
| CEACAM21   | -0.0396543 | 0.137142347 |
| AC092164.1 | 0.01042298 | 0.140020068 |
| NDUFA11    | -0.0192118 | 0.141715116 |
| ZNF223     | -0.0095053 | 0.144173486 |
| FGL2       | 0.11573239 | 0.14806191  |
| FBXO5      | 0.01208247 | 0.148440113 |
| PROSER2    | 0.00029057 | 0.149957514 |
| SNX3       | 0.14073619 | 0.150270998 |
| LINC02848  | 0.00406536 | 0.150743476 |
| ARMCX5     | -0.0017692 | 0.152382719 |
| AL080276.2 | 0.02290207 | 0.154042399 |
| MIEF2      | -0.0373266 | 0.154915696 |
| PIGQ       | -0.0085362 | 0.156142046 |
| USP49      | 0.03072781 | 0.156395715 |
| CHCHD6     | 0.01286019 | 0.156422463 |
| AC004943.2 | 0.01798881 | 0.157060556 |
| STARD7-AS  | 0.027685   | 0.158165749 |
| DNAJA4     | -0.0229536 | 0.15964101  |
| AMMECR1    | 0.02750275 | 0.165634832 |
| REEP5      | -0.0023208 | 0.16655604  |
| GLS        | -0.0361021 | 0.169815784 |
| LMO2       | 0.1422747  | 0.171364212 |
| ZNF710-AS1 | 0.05160686 | 0.171840827 |
| LINC02328  | -0.0114049 | 0.172588858 |
| HIGD2A     | 0.04649658 | 0.173794763 |
| TSPAN17    | 0.00609376 | 0.175219191 |
| RHOBTB3    | 0.03783993 | 0.176892328 |
| SRSF9      | -0.069036  | 0.177546338 |
| NLRC5      | -0.0204412 | 0.178836313 |

|            |            |             |
|------------|------------|-------------|
| PEX11A     | 0.01389323 | 0.179716983 |
| ARRDC4     | -0.0247169 | 0.179840522 |
| WDR83OS    | -0.035051  | 0.180116098 |
| SENP1      | 0.00141677 | 0.18270639  |
| AC011603.2 | 0.02512513 | 0.182731425 |
| ARPC1B     | -0.1574212 | 0.185263395 |
| LINC02361  | -0.074983  | 0.185380343 |
| MINK1      | 0.01713739 | 0.186913222 |
| HIST1H2BE  | 0.01654988 | 0.187452204 |
| CAMTA2     | -0.0059915 | 0.188241781 |
| CAPS       | -0.0132724 | 0.189736814 |
| PRR5L      | -0.0381481 | 0.191194523 |
| KBTBD11    | 0.02777503 | 0.193576391 |
| CEACAM4    | -0.0562375 | 0.194281165 |
| NAALADL2   | 0.02843657 | 0.195685792 |
| NCALD      | 0.00551552 | 0.196146744 |
| CLINT1     | -0.0389374 | 0.196477814 |
| RPS12      | 0.08500723 | 0.199899253 |
| TAF1A      | 0.00096507 | 0.201820819 |
| HMGA1P4    | -0.0137069 | 0.204530774 |
| METTL22    | 0.00044226 | 0.208942873 |
| ZNF662     | 0.02382301 | 0.209637754 |
| ATAD3C     | 0.03714122 | 0.209896153 |
| HGH1       | 0.03298622 | 0.2103612   |
| PRDM2      | -0.0805087 | 0.210394625 |
| ACTR5      | 0.01093184 | 0.210502055 |
| RARG       | -0.057264  | 0.216071037 |
| NPW        | -0.053079  | 0.216539744 |
| MEF2B      | -0.0047925 | 0.217570139 |
| ADAM9      | -0.0423263 | 0.218768901 |
| RACK1      | 0.09445763 | 0.219014422 |
| RIPK3      | -0.0466849 | 0.228607843 |
| PAN2       | 0.00752486 | 0.229584902 |
| ZNF473     | 0.01628031 | 0.230096224 |
| RAB11B-AS' | 0.00785567 | 0.230682732 |
| VILL       | 0.01483606 | 0.231294942 |
| TCTN2      | 0.01226503 | 0.232623644 |
| CYB5D1     | -0.0257229 | 0.237413469 |
| ZNF880     | -0.0844424 | 0.241446529 |
| MGAT5      | 0.00910931 | 0.242942464 |
| ZNF684     | -0.0191755 | 0.244669465 |
| R3HCC1L    | -0.0199628 | 0.252555759 |
| AP003486.1 | 0.02150796 | 0.254015057 |
| CKM        | -0.0136693 | 0.25446351  |
| NOD1       | 0.00345964 | 0.25793064  |
| CRADD      | 0.01544237 | 0.25933439  |
| LINC01004  | 0.029604   | 0.259727075 |
| KHDC1      | 0.02749737 | 0.264935782 |
| THRAP3     | -0.0250863 | 0.26591314  |
| FAM161B    | -0.0114577 | 0.26605814  |



|            |            |             |
|------------|------------|-------------|
| HOMER1     | -0.0195042 | 0.267410351 |
| ADPRH      | -0.0004242 | 0.269334967 |
| DICER1-AS1 | 0.04562021 | 0.269391821 |
| ZNF189     | -0.0023701 | 0.275196422 |
| SESN2      | -0.0745576 | 0.280533576 |
| ZBTB9      | 0.00289963 | 0.281667445 |
| AMN1       | -0.0029528 | 0.286870803 |
| BAZ2B      | 0.0227067  | 0.297735715 |
| TCTE3      | 0.01622189 | 0.298917922 |
| CACNA1A    | 0.00094085 | 0.299013662 |
| GLYCTK     | -0.0713927 | 0.303423722 |
| HHAT       | 0.01547181 | 0.306001578 |
| AL139260.1 | 0.02946119 | 0.306607889 |
| EMB        | -0.1274742 | 0.308072352 |
| MLLT11     | -0.0798737 | 0.320230326 |
| TANC2      | 0.02817977 | 0.32027923  |
| NYNRIN     | -0.0168366 | 0.321556031 |
| GNAI1      | -0.0486159 | 0.322718224 |
| BUB1       | 0.02343374 | 0.327775259 |
| AL133523.1 | 0.01010332 | 0.32809973  |
| C1QTNF4    | -0.1326889 | 0.328281854 |
| ZNF773     | -0.0126703 | 0.329572142 |
| IL12RB1    | -0.015107  | 0.340371701 |
| AL050309.1 | 0.02713332 | 0.343058015 |
| AC093827.4 | -0.0105262 | 0.353742764 |
| AC099778.1 | 0.01931922 | 0.356592371 |
| IPPK       | -0.0194169 | 0.365523347 |
| LCMT2      | 0.04363691 | 0.3695756   |
| KMT2E-AS1  | -0.0067862 | 0.377610199 |
| KIAA0556   | -0.0369594 | 0.381762502 |
| SPARC      | -0.0642033 | 0.390589941 |
| TMEM116    | 0.02439491 | 0.39770215  |
| AC091057.6 | 0.02234679 | 0.399985251 |
| SRSF11     | 0.01320158 | 0.409905025 |
| GNB1L      | 0.03846708 | 0.412119376 |
| EIF3A      | 0.08221454 | 0.413351277 |
| SVOPL      | 0.02771942 | 0.415906775 |
| TIE1       | -0.0250776 | 0.41736303  |
| BIRC3      | -0.0625763 | 0.420046397 |
| IL13RA1    | 0.05129218 | 0.428077442 |
| AMT        | -0.0053146 | 0.430234033 |
| FAM24B     | -0.0059899 | 0.434994947 |
| C16orf46   | -0.01207   | 0.445644617 |
| ZNF142     | 0.00945183 | 0.45540405  |
| CFAP70     | 0.01190484 | 0.462087222 |
| SULT1A3    | 0.01576116 | 0.476164844 |
| ENKD1      | -0.0154004 | 0.492840725 |
| ZNF526     | -0.0363874 | 0.506900884 |
| SEMA6B     | -0.0300435 | 0.509471979 |
| ASB1       | -0.0322806 | 0.512135376 |

|             |            |             |
|-------------|------------|-------------|
| TMEM268     | -0.013282  | 0.524563477 |
| ARMC2       | 0.01334535 | 0.528588923 |
| PAK1        | 0.01168765 | 0.52874133  |
| AC245452.1  | 0.01000182 | 0.55671449  |
| RGPD2       | -0.0001937 | 0.557804253 |
| DENND5B     | 0.04227873 | 0.564506426 |
| FAAP24      | 0.02883365 | 0.567578158 |
| SP100       | 0.08662982 | 0.573840469 |
| ZNF14       | -0.0036681 | 0.575452088 |
| GATA2-AS1   | -0.0510046 | 0.576922889 |
| CENPS       | -0.0230747 | 0.578889571 |
| MAEL        | 0.02887052 | 0.580855665 |
| IFT88       | -0.0675172 | 0.60399185  |
| PIM2        | -0.0056537 | 0.630689179 |
| AC130895.1  | -0.0163221 | 0.64396366  |
| ABLIM1      | 0.01622415 | 0.64716688  |
| COX5A       | 0.0212079  | 0.658483003 |
| CAPN10-DT   | 0.01426664 | 0.663408892 |
| AC026979.4  | 0.02451833 | 0.664958139 |
| MVK         | -0.0157771 | 0.669311973 |
| TAF1C       | -0.0100416 | 0.675321741 |
| CD69        | -0.1221422 | 0.682664922 |
| BBS7        | 0.0528852  | 0.695602947 |
| MORF4L1     | -0.1662403 | 0.702062671 |
| ZFHX3       | 0.00080164 | 0.743003205 |
| AC093849.4  | 0.02742316 | 0.746955714 |
| GCC2        | -0.0326777 | 0.754425665 |
| TNFSF4      | -0.0034373 | 0.768845813 |
| AL356804.1  | 0.0468084  | 0.776087908 |
| DNAJC27-AS1 | 0.00417506 | 0.785827182 |
| TTC8        | 0.01049073 | 0.797048582 |
| CCDC142     | -0.0189218 | 0.801638829 |
| ZNF444      | -0.0191704 | 0.844527784 |
| PTAFR       | -0.012322  | 0.85872754  |
| HOXB-AS1    | 0.01502649 | 0.927146889 |
| HNRNPK      | 0.10947862 | 0.943447396 |
| AC012020.1  | -0.0204054 | 0.969837095 |
| SLC16A1-AS1 | 0.00783629 | 0.977698652 |
| ZMYND8      | 0.06546638 | 0.986619233 |
| ZNF799      | 0.00255903 | 1           |
| HDAC9       | -0.1090862 | 1           |
| DZANK1      | 0.0099097  | 1           |
| DSCC1       | 0.01377353 | 1           |
| TMEM86B     | -0.0738291 | 1           |
| KYNU        | 0.01791814 | 1           |
| LRP12       | 0.00281914 | 1           |
| MT-CO2      | 0.11294877 | 1           |
| TMEM237     | 0.02468482 | 1           |
| SLC4A2      | -0.0222978 | 1           |
| UFC1        | 0.06914938 | 1           |

|            |            |   |
|------------|------------|---|
| ZNF513     | -0.0148841 | 1 |
| NAGA       | 0.01474142 | 1 |
| IFT81      | 0.00579694 | 1 |
| ZNF691     | -0.0083265 | 1 |
| GAS2       | 0.0520269  | 1 |
| MICALL1    | -0.027055  | 1 |
| PTP4A2     | 0.08469515 | 1 |
| HLX        | -0.0004827 | 1 |
| TRIM46     | -0.0045928 | 1 |
| AC009962.1 | 0.02793996 | 1 |
| SLC44A2    | -0.0686447 | 1 |
| DDX11      | 0.02959645 | 1 |
| AC000065.2 | -0.0057497 | 1 |
| ABHD17C    | -0.008768  | 1 |
| ABCC10     | -0.0047891 | 1 |
| NFKBIZ     | 0.04268288 | 1 |
| NDUFB4     | -0.0513618 | 1 |
| AL117332.1 | 0.01019226 | 1 |
| AACS       | 0.02319893 | 1 |
| OSM        | -0.0581365 | 1 |
| MYO1B      | -0.0562461 | 1 |
| SLC35C1    | -0.0250966 | 1 |
| AC027279.1 | 0.01001222 | 1 |
| AQP3       | 0.08788621 | 1 |
| IGF2BP3    | -0.1020266 | 1 |
| SMIM13     | -3.159E-05 | 1 |
| HLA-DRB5   | -0.1932009 | 1 |
| MYO7B      | 0.01154928 | 1 |
| FANCD2     | 0.00589566 | 1 |
| FGGY       | -0.0451962 | 1 |
| AL049840.5 | -0.0553579 | 1 |
| POLR2L     | -0.0383981 | 1 |
| SEPTIN6    | -0.0068009 | 1 |
| VARS2      | 0.01796183 | 1 |
| VPS9D1     | -0.046058  | 1 |
| SSR4       | -0.1351864 | 1 |
| KIFC3      | -0.0944833 | 1 |
| INPP5E     | -0.0499289 | 1 |
| RBM43      | 0.05475558 | 1 |
| DNAJA1     | -0.0182024 | 1 |
| AC007686.3 | -0.0532569 | 1 |
| CLDN10     | 0.02430361 | 1 |
| RNASEK     | 0.06957685 | 1 |
| ATAD3B     | -0.0251442 | 1 |
| GPR141     | 0.02154663 | 1 |
| C9orf16    | 0.05485025 | 1 |
| CCNL1      | -0.1161786 | 1 |
| MICB       | -0.0085765 | 1 |
| LPAR2      | -0.0447798 | 1 |
| HIST1H2BD  | -0.0553523 | 1 |

|            |            |   |
|------------|------------|---|
| GTF3A      | 0.06529835 | 1 |
| CTU2       | 0.02318163 | 1 |
| AC040970.1 | -0.0109837 | 1 |
| GDPD1      | -0.0522539 | 1 |
| DDX21      | 0.05817662 | 1 |
| EIF2AK3    | -0.0017622 | 1 |
| ATP5F1C    | 0.00770546 | 1 |
| ECT2       | 0.00121241 | 1 |
| HACD1      | 0.01883289 | 1 |
| RPL7       | 0.06967126 | 1 |
| ICAM4      | -0.0024145 | 1 |
| PIP4K2C    | 0.02518909 | 1 |
| NCF1       | 0.0351639  | 1 |
| PPA1       | 0.15728562 | 1 |
| DBF4B      | 0.02831039 | 1 |
| SLC25A5    | 0.11155792 | 1 |
| MAX        | -0.0401558 | 1 |
| AC004812.2 | -0.0282799 | 1 |
| DSC2       | 0.0055145  | 1 |
| C3orf80    | -0.0537624 | 1 |
| SFMBT2     | -0.0172613 | 1 |
| EIF5B      | -0.0360856 | 1 |
| FKRP       | -0.0299493 | 1 |
| CCDC26     | 0.03157574 | 1 |
| PASK       | 0.03489661 | 1 |
| FAM81B     | -0.0291284 | 1 |
| FBXO31     | -0.0389071 | 1 |
| AC091729.3 | 0.02024347 | 1 |
| AL683813.1 | -0.0065302 | 1 |
| ZNF625     | 0.03834421 | 1 |
| GSTO1      | 0.05606904 | 1 |
| EHD2       | -0.0546146 | 1 |
| HAUS8      | 0.00586225 | 1 |
| ACVR1      | 0.03383093 | 1 |
| SUV39H2    | 0.024459   | 1 |
| SERAC1     | -0.0055448 | 1 |
| SERPINI1   | 0.06408874 | 1 |
| ARHGAP26   | -0.0301395 | 1 |
| ACTB       | -0.1668166 | 1 |
| MT-ND1     | -0.1599368 | 1 |
| DDX3X      | -0.1202084 | 1 |
| AL591623.1 | -0.0542436 | 1 |
| ITGA2B     | -0.0654317 | 1 |
| HEXIM1     | 0.0104806  | 1 |
| AL050341.2 | -0.0160851 | 1 |
| ATP6V1G1   | -0.0714352 | 1 |
| AURKA      | 0.04627555 | 1 |
| GABARAP    | -0.1435718 | 1 |
| SAMD10     | -0.026337  | 1 |
| TIGD6      | 0.00374453 | 1 |

|                        |            |   |
|------------------------|------------|---|
| GMFG                   | -0.1226918 | 1 |
| PRDM10                 | 0.02013326 | 1 |
| PITPNC1                | 0.00380223 | 1 |
| AP003068.2             | -0.0361648 | 1 |
| RPS14                  | -0.1191103 | 1 |
| LAMTOR5-A              | 0.00485502 | 1 |
| KLF11                  | -0.012428  | 1 |
| AL451165.2             | -0.0156129 | 1 |
| LYL1                   | 0.03986071 | 1 |
| HCP5                   | 0.02061123 | 1 |
| ZNF771                 | -0.0029602 | 1 |
| AL358780.1             | -0.007772  | 1 |
| ERP29                  | 0.03552852 | 1 |
| YY1                    | -0.0074533 | 1 |
| GALNT6                 | -0.0205116 | 1 |
| NPC1                   | -0.0107164 | 1 |
| FAM27C                 | -0.0008933 | 1 |
| SMIM14                 | 0.03147824 | 1 |
| REC8                   | -0.0087908 | 1 |
| HIST2H2AA <sub>4</sub> | 0.01353217 | 1 |
| GDPGP1                 | -0.007156  | 1 |
| RETN                   | 0.00076058 | 1 |
| CST7                   | -0.0847614 | 1 |
| FCSK                   | 0.01560508 | 1 |
| AC095057.3             | -0.0118818 | 1 |
| CCNA1                  | 0.0164413  | 1 |
| AL118516.1             | -0.0923167 | 1 |
| CEBPD                  | 0.0686605  | 1 |
| PRXL2B                 | 0.02288888 | 1 |
| MICA                   | 0.00542928 | 1 |
| MYOF                   | -0.0175966 | 1 |
| EIF1B                  | -0.1489676 | 1 |
| ZSWIM4                 | -0.0684277 | 1 |
| USP54                  | 0.00837368 | 1 |
| CLU                    | -0.213906  | 1 |
| CYP2U1                 | 0.02574711 | 1 |
| NCAPG2                 | 0.01278674 | 1 |
| ZNF682                 | -0.0064172 | 1 |
| TEX9                   | 0.01424452 | 1 |
| ENPP2                  | -0.0481738 | 1 |
| LGALS3                 | 0.0149058  | 1 |
| ZNF528                 | 0.03095351 | 1 |
| AC009318.1             | 0.06147499 | 1 |
| IBA57                  | -0.0230067 | 1 |
| MAP11                  | -0.0103903 | 1 |
| AL121944.1             | -0.0729022 | 1 |
| GLIPR1                 | -0.1102398 | 1 |
| COX6C                  | 0.01983409 | 1 |
| HLA-DMB                | -0.0501246 | 1 |
| AC015982.2             | 0.02159164 | 1 |

|            |            |   |
|------------|------------|---|
| HIST1H4H   | 0.00880784 | 1 |
| AC092620.1 | 0.01135856 | 1 |
| SUMO2      | -0.107271  | 1 |
| FOXP1      | -0.0237637 | 1 |
| AC069185.1 | 0.04013275 | 1 |
| DXO        | -0.0429775 | 1 |
| TKT        | 0.08470644 | 1 |
| AC015871.1 | 0.02163779 | 1 |
| ACSF2      | -0.0089837 | 1 |
| TAOK3      | 0.07763065 | 1 |
| RAN        | -0.0683784 | 1 |
| AC132192.2 | -0.0069638 | 1 |
| APOM       | 0.00088964 | 1 |
| CDR2       | 0.01364658 | 1 |
| HLA-DRB1   | -0.0278334 | 1 |
| PDZD8      | 0.05032531 | 1 |
| ZNF763     | 0.00669468 | 1 |
| TSPAN13    | -0.0112114 | 1 |
| AC009065.4 | 0.00960605 | 1 |
| CCDC112    | 0.03208218 | 1 |
| COX7A2     | -0.0197939 | 1 |
| GAN        | -0.0029619 | 1 |
| ZNF584     | -0.0310823 | 1 |
| MYL12B     | -0.1244596 | 1 |
| DCLRE1B    | -0.0011998 | 1 |
| DANT2      | 0.02640479 | 1 |
| ARHGDIB    | -0.1340634 | 1 |
| DRAP1      | 0.0120317  | 1 |
| MIR4453HG  | -0.0207897 | 1 |
| HNRNPH1    | 0.11286884 | 1 |
| CHURC1     | 0.01011732 | 1 |
| CALM2      | -0.0443601 | 1 |
| ALDH2      | -0.0034232 | 1 |
| ARF4-AS1   | 0.00999503 | 1 |
| GNG5       | 0.01543249 | 1 |
| CACNA1C-A  | 0.0105722  | 1 |
| RPS15      | -0.1114795 | 1 |
| CDC37L1-D1 | 0.01651216 | 1 |
| SYF2       | 0.02455719 | 1 |
| TULP3      | 0.01458954 | 1 |
| COX8A      | -0.0307931 | 1 |
| RHOB       | -0.0668405 | 1 |
| YTHDF3-AS  | -0.0435689 | 1 |
| DOCK8-AS1  | -0.0034905 | 1 |
| EIF3L      | 0.04913183 | 1 |
| KIF3A      | 0.00068649 | 1 |
| TAF1D      | 0.07450647 | 1 |
| BX640514.2 | -0.0042425 | 1 |
| ELOB       | -0.0535173 | 1 |
| RPS3A      | 0.06920187 | 1 |

|            |            |   |
|------------|------------|---|
| SEM1       | -0.0471444 | 1 |
| EIF3F      | -0.1201136 | 1 |
| HLA-DQA2   | -0.01632   | 1 |
| C17orf49   | -0.0555131 | 1 |
| PTGS2      | -0.1101245 | 1 |
| HNRNPA2B1  | 0.03101633 | 1 |
| AC091271.1 | -0.0499616 | 1 |
| HNRNPA0    | -3.175E-05 | 1 |
| RPL17      | 0.02270395 | 1 |
| BASP1      | -0.0285878 | 1 |
| TSPYL2     | -0.0052183 | 1 |
| ACRBP      | -0.0392624 | 1 |
| RPS16      | 0.04210237 | 1 |
| SNHG29     | 0.03824203 | 1 |
| ACY3       | -0.0017865 | 1 |
| RAB3IP     | 0.00614192 | 1 |
| C11orf95   | 0.00010702 | 1 |
| NSMF       | -0.0384774 | 1 |
| SELL       | -0.035311  | 1 |
| CALR       | 0.00245673 | 1 |
| DGCR6      | -0.0388785 | 1 |
| RPL23A     | 0.03807511 | 1 |
| STX2       | -0.0279644 | 1 |
| MALAT1     | -0.0047043 | 1 |
| SLC25A45   | 0.00893193 | 1 |
| HIST1H2AG  | -0.0155675 | 1 |
| AC127496.5 | 0.01484006 | 1 |
| RTRAF      | 0.05204629 | 1 |
| HLA-DQB1   | -0.0386621 | 1 |
| AFF3       | -0.0245504 | 1 |
| AL355075.4 | -0.0512313 | 1 |
| JHY        | -0.0308195 | 1 |
| C11orf58   | -0.010692  | 1 |
| SNHG7      | 0.15102709 | 1 |
| POLR1D     | 0.00334631 | 1 |
| MT-ND4     | -0.0842852 | 1 |
| ANKRD12    | -0.0689046 | 1 |
| SERPINF1   | -0.0218818 | 1 |
| ATP5F1D    | 0.04143848 | 1 |
| RSPH3      | -0.019895  | 1 |
| NQO1       | -0.0088753 | 1 |
| GSTP1      | -0.0813084 | 1 |
| MBNL1      | -0.066606  | 1 |
| HMGB3      | -0.0505126 | 1 |
| PHYHD1     | 0.01467014 | 1 |
| SLC25A3    | -0.0694091 | 1 |
| FAM161A    | -0.0137515 | 1 |
| MFGE8      | 0.01431552 | 1 |
| IER5L      | -0.0403669 | 1 |
| OAZ1       | -0.1003634 | 1 |

|            |            |   |
|------------|------------|---|
| RPL14      | 0.04000178 | 1 |
| TSC22D1-A5 | 0.01602652 | 1 |
| PCK2       | -0.041861  | 1 |
| HIST2H2BF  | 0.01015347 | 1 |
| GPR35      | -0.0424168 | 1 |
| PRDX1      | -0.0026512 | 1 |
| AREG       | -0.0507654 | 1 |
| POP1       | 0.01210092 | 1 |
| ARPC3      | 0.0342907  | 1 |
| CKB        | -0.0451086 | 1 |
| PSME1      | 0.0705655  | 1 |
| PPIA       | -0.0650312 | 1 |
| PLAC8      | 0.23314372 | 1 |
| PEBP1      | -0.0666826 | 1 |
| RAD51B     | 0.00715022 | 1 |
| SERP1      | 0.07327529 | 1 |
| ZNF710     | -0.0089589 | 1 |
| CSRNP2     | -0.0175447 | 1 |
| RPLP1      | -0.0458409 | 1 |
| HLA-DQA1   | -0.0262931 | 1 |
| RPS7       | -7.214E-05 | 1 |
| LINC00211  | 0.00385705 | 1 |
| ARPC2      | -0.0578358 | 1 |
| LAPTM5     | 0.00697289 | 1 |
| RPLP0      | -0.0060576 | 1 |
| AC002467.1 | -0.004919  | 1 |
| ZNF165     | -0.0578164 | 1 |
| EIF4A1     | -0.0919315 | 1 |
| RPL6       | -0.0971659 | 1 |
| MT-ATP6    | -0.04199   | 1 |
| LAT        | -0.0156077 | 1 |
| EIF3H      | -0.0284062 | 1 |
| FXD5       | 0.03598181 | 1 |
| HIST1H3H   | -0.0127967 | 1 |
| RPS2       | 0.00082084 | 1 |
| ITM2B      | -0.1114254 | 1 |
| EIF3K      | -0.0283007 | 1 |
| AC087239.1 | -0.0266292 | 1 |
| RPS8       | -0.0576144 | 1 |
| SLFN5      | 0.00421172 | 1 |
| RPL18      | -0.0199209 | 1 |
| ID2        | 0.02060094 | 1 |
| OST4       | -0.0886735 | 1 |
| NOP53      | -0.0181293 | 1 |
| EIF1AX     | 0.02580248 | 1 |
| SLC25A6    | -0.0410395 | 1 |
| H2AFY      | -0.1855225 | 1 |
| MT-ND5     | -0.044906  | 1 |
| RPS19      | -0.064991  | 1 |
| RPL35      | -0.0259534 | 1 |



|         |            |   |
|---------|------------|---|
| RSL24D1 | -0.0287695 | 1 |
| UBA52   | -0.0234031 | 1 |
| EEF1B2  | -0.0748628 | 1 |
| RPS18   | -0.0547155 | 1 |
| NDUFA4  | 0.05027671 | 1 |
| BTF3    | -0.02879   | 1 |
| RPS6    | -0.0370153 | 1 |
| ANP32B  | -0.0461142 | 1 |
| ENO1    | -0.0284091 | 1 |
| MT-CO1  | 0.00344187 | 1 |
| HINT1   | -0.0073061 | 1 |

**ILs after standard culture versus pre-culture (reference). Only genes expressed in >10%**





































































































































































































































































































































































































































































































**% of single cells are reported. Log2 Fold Change (FC) and FDR-adjusted p-value.**

**Supplementary Table 11. Differential gene expression averaged across 500 progenitor**

| <b>Gene</b> | <b>log2FC</b> | <b>FDR q-value</b>    |
|-------------|---------------|-----------------------|
| ANXA1       | -2.3375846    | 0                     |
| MYADM       | -2.8060444    | 0                     |
| TAGLN2      | -1.9334824    | 0                     |
| VIM         | -3.4069547    | 0                     |
| TSC22D3     | -2.8462124    | 2.77974178057077e-318 |
| LMNA        | -3.6404171    | 6.02E-308             |
| CRIP1       | -3.8948268    | 2.00E-286             |
| RGCC        | -3.2919423    | 1.84E-250             |
| EMP3        | -1.8746542    | 3.26E-216             |
| ADGRE5      | -1.7790391    | 4.78E-213             |
| ATP2B1      | -1.9134165    | 2.81E-211             |
| CD99        | -1.4483342    | 6.52E-176             |
| EMP1        | -1.8965051    | 1.51E-162             |
| UBC         | -1.1812184    | 2.12E-161             |
| LRRFIP1     | -1.3110344    | 1.00E-160             |
| IRF1        | -1.5670636    | 2.34E-156             |
| TGFB1       | -1.2590533    | 2.40E-156             |
| TUBA1A      | -1.8150254    | 2.47E-156             |
| EGR1        | 1.4080353     | 2.83E-148             |
| S100A11     | -1.8170291    | 9.76E-146             |
| SAT1        | -1.5612057    | 9.75E-140             |
| UCP2        | -1.4462797    | 2.12E-139             |
| CLIC1       | -0.9032945    | 1.87E-138             |
| ANGPT1      | 1.4088588     | 3.38E-137             |
| TUBB4B      | -1.3572877    | 3.30E-136             |
| DNAJB6      | -1.1722718    | 1.26E-135             |
| IDS         | -1.2086669    | 1.05E-128             |
| CD44        | -1.121522     | 3.12E-127             |
| EIF1        | -0.7630081    | 9.35E-124             |
| RARA        | -0.9502257    | 3.64E-120             |
| PLCG2       | 1.0773338     | 2.43E-118             |
| MYC         | 1.3047563     | 1.45E-114             |
| RAB11FIP1   | -1.1289048    | 1.06E-113             |
| ITGA5       | -1.0911463    | 4.75E-113             |
| TNFRSF12A   | -0.9242382    | 1.25E-112             |
| RUNX3       | -1.2366208    | 2.79E-112             |
| AHNAK       | -1.4763885    | 6.31E-111             |
| MAP2K3      | -1.0552356    | 4.56E-109             |
| MIDN        | -1.0976542    | 1.78E-108             |
| TIPARP      | -1.2088022    | 9.93E-108             |
| HES1        | -1.2048366    | 2.04E-106             |
| CRIP2       | -0.7447854    | 2.19E-105             |
| AC020916.1  | -1.4169928    | 1.54E-103             |
| PER1        | -0.8352433    | 2.45E-102             |
| MYL6        | -0.8125559    | 2.70E-102             |
| RELB        | -0.8180123    | 3.13E-101             |
| RASL10A     | -0.6792563    | 2.60E-100             |

|           |            |           |
|-----------|------------|-----------|
| TUBB6     | -0.9245059 | 4.68E-100 |
| RTN4      | -0.9604063 | 1.38E-98  |
| HSPA5     | -1.8358802 | 1.43E-97  |
| CXXC5     | -1.0838766 | 2.11E-97  |
| RALGDS    | -1.0280196 | 2.02E-94  |
| RAP1B     | -0.9034915 | 3.04E-93  |
| AKAP13    | -0.9864108 | 3.85E-93  |
| KMT2E     | -0.8690247 | 1.51E-91  |
| SERBP1    | 0.7647731  | 1.90E-89  |
| GABPB1-AS | 1.0452194  | 2.63E-89  |
| ZBTB7A    | -0.9680911 | 1.34E-88  |
| CREB5     | -0.9505609 | 2.01E-88  |
| RPS27     | 0.4148093  | 6.83E-88  |
| TMSB10    | -0.7329173 | 8.06E-88  |
| RBM38     | -0.8145607 | 4.06E-86  |
| SLC40A1   | 0.9754483  | 2.11E-85  |
| TPSAB1    | 1.3237574  | 2.15E-85  |
| SKIL      | -0.871665  | 6.27E-85  |
| CDKN1A    | -0.7174621 | 1.82E-84  |
| PHLDA2    | -0.7528447 | 1.06E-83  |
| MGST1     | 1.086087   | 2.94E-83  |
| SH3BGRL3  | -0.7578811 | 3.61E-83  |
| DSTN      | -0.8899183 | 1.89E-82  |
| PRXL2C    | -0.8148852 | 1.13E-81  |
| KCTD9     | -0.9431098 | 1.74E-81  |
| FSCN1     | -0.7832123 | 1.94E-81  |
| GNA15     | -0.7784873 | 2.42E-81  |
| PLK3      | -0.8303839 | 3.21E-81  |
| NFATC1    | -0.7414664 | 4.40E-80  |
| PLP2      | -0.8008794 | 8.13E-80  |
| GPR183    | -1.1209152 | 3.31E-79  |
| EFHD2     | -0.8720996 | 3.69E-79  |
| FLT3      | 1.0137087  | 4.33E-79  |
| DDIT4     | -0.8930427 | 6.91E-79  |
| FYB1      | 0.8234275  | 4.22E-78  |
| RHOG      | -0.7679749 | 2.27E-77  |
| H1FX      | -1.4189585 | 2.04E-74  |
| LARS      | 0.7769379  | 2.14E-74  |
| ARID4B    | -0.8675474 | 4.61E-74  |
| FTH1      | -0.8614378 | 6.69E-74  |
| CALM1     | -0.89153   | 9.37E-74  |
| URI1      | 0.7396917  | 3.01E-73  |
| MTURN     | -0.7854517 | 2.69E-72  |
| PDLIM1    | -0.6918546 | 3.65E-72  |
| KLF13     | -0.8309398 | 5.95E-72  |
| ARF6      | -0.7281482 | 6.56E-72  |
| JUND      | -0.870247  | 1.31E-71  |
| GLIPR2    | -0.7445711 | 2.69E-71  |
| NCL       | 0.8140783  | 3.14E-71  |
| RPS29     | 0.4217363  | 3.66E-71  |

|           |            |          |
|-----------|------------|----------|
| CTSC      | 0.769119   | 1.13E-70 |
| NINJ1     | -0.8286644 | 2.94E-70 |
| RPS17     | 0.6291208  | 4.73E-70 |
| SLC9A3R1  | -0.880831  | 6.31E-70 |
| EXOSC5    | 0.4991194  | 6.99E-70 |
| PPP1R15A  | -0.8623278 | 1.29E-69 |
| PLEC      | -0.7650252 | 2.69E-69 |
| RASGEF1B  | -0.6399277 | 3.83E-69 |
| ELMSAN1   | -0.8180367 | 8.56E-69 |
| RHOA      | -0.7152543 | 9.04E-69 |
| ADAM17    | -0.8321232 | 2.90E-68 |
| MT-ND6    | 0.8328146  | 4.36E-68 |
| NAP1L1    | 0.6942548  | 7.12E-68 |
| TRA2B     | 0.7431242  | 8.16E-68 |
| RILPL2    | -0.7280735 | 1.02E-67 |
| HIC1      | -0.4801841 | 1.19E-67 |
| SAMHD1    | -0.5561217 | 1.31E-67 |
| TNFSF13B  | 0.7386027  | 3.37E-67 |
| LINC02470 | 0.5493023  | 1.09E-66 |
| SNHG6     | 0.5946499  | 2.51E-66 |
| S100A10   | -1.1342465 | 4.20E-66 |
| YWHAZ     | -0.8344214 | 7.69E-66 |
| RGS18     | 0.6505081  | 8.56E-66 |
| PPP1CB    | -0.7346874 | 1.34E-65 |
| HSP90AB1  | 0.5774752  | 2.15E-65 |
| SQSTM1    | -0.8276299 | 2.69E-65 |
| SLC16A3   | -0.760693  | 8.38E-65 |
| HIPK1     | -0.7511448 | 9.53E-65 |
| CIRBP     | -0.6498825 | 1.20E-64 |
| LGALS1    | -1.6152859 | 2.18E-64 |
| NUCB2     | 0.7411786  | 2.26E-64 |
| CITED2    | 0.7506561  | 5.02E-64 |
| IL1B      | 0.6108414  | 8.06E-64 |
| MT-ND3    | 0.5625418  | 8.15E-64 |
| SYNJ2     | -0.8020373 | 1.01E-63 |
| CDC42     | -0.5961551 | 1.35E-63 |
| RSL1D1    | 0.676936   | 1.36E-63 |
| C16orf54  | -0.693213  | 1.53E-63 |
| HSPD1     | 0.8049305  | 1.94E-63 |
| CTNNB1    | -0.7862111 | 2.08E-63 |
| CD74      | -0.8299169 | 1.93E-62 |
| FOS       | 1.7253516  | 3.02E-62 |
| BCL3      | -0.6176758 | 3.27E-62 |
| MYB       | 0.7631585  | 4.92E-62 |
| TPPP      | -0.4144221 | 1.24E-61 |
| NACA      | 0.4265483  | 1.78E-61 |
| WTAP      | -0.7029793 | 2.47E-61 |
| SEPTIN11  | -0.7584018 | 2.75E-61 |
| HSPE1     | 0.7400543  | 3.96E-61 |
| EZR       | -0.8252969 | 6.32E-61 |

|            |            |          |
|------------|------------|----------|
| RPL23      | 0.5565163  | 9.15E-61 |
| UBB        | -0.6368248 | 1.01E-60 |
| PPIL4      | -0.6866952 | 1.04E-60 |
| RAC1       | -0.5814325 | 1.04E-60 |
| AL034397.3 | 0.6876035  | 1.54E-60 |
| TREM1      | -0.7461672 | 3.45E-60 |
| MAT2A      | 0.691087   | 6.06E-60 |
| CSNK1A1    | -0.6472702 | 6.95E-60 |
| NAIP       | 0.4795289  | 1.68E-59 |
| PRKDC      | 0.7490084  | 2.30E-59 |
| MAP7D1     | -0.6579252 | 2.33E-59 |
| SRSF7      | 0.8146123  | 2.74E-59 |
| FBXO34     | -0.7228079 | 3.52E-59 |
| ID1        | -1.4518007 | 4.51E-59 |
| RELL1      | -0.6900161 | 5.26E-59 |
| SGMS2      | -0.5088485 | 1.06E-58 |
| BHLHE40    | -0.7521365 | 3.09E-58 |
| PRR7       | -0.5902877 | 2.15E-57 |
| BCO2       | -0.4949324 | 7.10E-57 |
| KNOP1      | 0.5388451  | 7.16E-57 |
| CD69       | 0.7925926  | 7.78E-57 |
| KLF10      | -0.7750911 | 8.33E-56 |
| KLF3       | -0.7688005 | 8.92E-56 |
| GUCY1A1    | 0.8399423  | 1.27E-55 |
| TSC22D1    | -0.9992725 | 1.67E-55 |
| PHF20      | -0.7070596 | 2.56E-55 |
| CYTH1      | -0.714906  | 9.51E-55 |
| TES        | -0.7359663 | 9.51E-55 |
| UBE2B      | -0.6184324 | 1.01E-54 |
| SARAF      | -0.5948516 | 3.10E-54 |
| ARID5A     | -0.5980679 | 3.11E-54 |
| PIM3       | -0.7034108 | 3.54E-54 |
| MPC2       | -0.5922254 | 4.69E-54 |
| RPL38      | 0.3892273  | 8.56E-54 |
| PA2G4      | 0.705504   | 1.12E-53 |
| KRAS       | -0.6880215 | 1.40E-53 |
| SMC4       | 0.8153522  | 1.87E-53 |
| SH2B3      | -0.5788013 | 5.42E-53 |
| NDUFB1     | 0.5518209  | 6.31E-53 |
| ARL4A      | -0.7156848 | 7.64E-53 |
| CFL1       | -0.5831536 | 1.78E-52 |
| DDAH2      | -0.7207221 | 2.46E-52 |
| UPP1       | -0.6458077 | 2.59E-52 |
| SRSF3      | 0.6365869  | 9.95E-52 |
| G3BP2      | -0.6379984 | 3.30E-51 |
| CAPZA2     | -0.6842469 | 3.42E-51 |
| GPR132     | -0.3693264 | 3.87E-51 |
| KIT        | 0.6593851  | 4.41E-51 |
| SPART      | 0.5780663  | 6.56E-51 |
| CDKN2D     | -0.5647668 | 1.31E-50 |

|            |            |          |
|------------|------------|----------|
| NOTCH1     | -0.6077643 | 1.36E-50 |
| LSP1       | -0.7275904 | 1.69E-50 |
| MBP        | -0.6240107 | 2.46E-50 |
| ICAM3      | -0.6248732 | 2.88E-50 |
| VAMP8      | 0.5308186  | 3.66E-50 |
| ATP6V0C    | -0.6077886 | 6.96E-50 |
| ARGLU1     | 0.64963    | 7.03E-50 |
| HIST1H4C   | 0.6885248  | 9.54E-50 |
| ODF3L1     | -0.3286139 | 1.31E-49 |
| SLC35E4    | -0.5338172 | 3.39E-49 |
| TSPAN2     | -0.4020165 | 4.35E-49 |
| VSIR       | -0.7551198 | 6.02E-49 |
| CSRNP1     | -0.4984515 | 7.21E-49 |
| KPNA4      | -0.5623653 | 7.56E-49 |
| MAN1A1     | 0.5253519  | 8.49E-49 |
| KDM6B      | -0.7210531 | 1.23E-48 |
| SAP18      | -0.6208584 | 1.72E-48 |
| CNBP       | 0.4960513  | 2.58E-48 |
| LYN        | -0.664876  | 3.83E-48 |
| CD81       | 0.5694394  | 4.70E-48 |
| DBI        | -0.6873553 | 5.27E-48 |
| BAIAP2     | -0.487717  | 6.22E-48 |
| JMJD1C     | -0.6935987 | 1.41E-47 |
| SIK3       | -0.5901243 | 1.47E-47 |
| IER3       | -0.7125024 | 2.14E-47 |
| AGPAT4     | -0.5362766 | 2.61E-47 |
| PNP        | -0.6890413 | 3.10E-47 |
| BPTF       | 0.6601391  | 3.37E-47 |
| CYTH4      | -0.6137942 | 3.41E-47 |
| ORAI1      | -0.5627058 | 3.47E-47 |
| ZSCAN18    | -0.5418669 | 3.48E-47 |
| SORL1      | 0.5818594  | 6.11E-47 |
| ANTXR2     | -0.6214411 | 7.18E-47 |
| IGLL1      | 1.0592249  | 8.24E-47 |
| HMGN1      | 0.483043   | 1.30E-46 |
| ZBTB43     | -0.5959507 | 1.85E-46 |
| SMAD7      | -0.4343352 | 2.08E-46 |
| AC245060.5 | 0.635308   | 2.11E-46 |
| ZFAS1      | 0.6328955  | 3.30E-46 |
| DENND4A    | -0.5889258 | 5.39E-46 |
| RGS19      | -0.6468079 | 5.99E-46 |
| ABCA1      | -0.3850176 | 1.92E-45 |
| PDGFA      | -0.3855108 | 2.02E-45 |
| DYNLT1     | -0.525485  | 2.21E-45 |
| MBOAT7     | -0.6093199 | 3.31E-45 |
| LUC7L3     | 0.5494009  | 3.57E-45 |
| NPTX2      | -0.4220788 | 3.80E-45 |
| CA5B       | -0.4670887 | 4.01E-45 |
| IFT57      | -0.5271033 | 4.25E-45 |
| GAS2L1     | -0.3297031 | 7.15E-45 |

|           |            |          |
|-----------|------------|----------|
| MOB3A     | -0.5207653 | 1.23E-44 |
| SUCNR1    | 0.9348603  | 1.99E-44 |
| TACC1     | -0.6530757 | 2.70E-44 |
| TMOD3     | -0.5756527 | 2.78E-44 |
| YPEL5     | -0.8023338 | 3.37E-44 |
| HIF1A     | -0.699186  | 3.53E-44 |
| VMP1      | -0.755802  | 3.88E-44 |
| CD302     | 0.5718772  | 1.14E-43 |
| MTSS1     | -0.3884714 | 1.24E-43 |
| SRSF5     | 0.5584836  | 1.44E-43 |
| RARA-AS1  | -0.3752558 | 1.58E-43 |
| PPP1R18   | -0.4920837 | 1.72E-43 |
| CD82      | -0.6218657 | 1.89E-43 |
| CMTM3     | -0.5960847 | 3.50E-43 |
| CMSS1     | 0.4330819  | 6.05E-43 |
| TMBIM4    | 0.5583937  | 6.48E-43 |
| NAMPT     | -0.7123379 | 7.39E-43 |
| DENND6B   | -0.5192026 | 1.85E-42 |
| R3HDM4    | -0.5630016 | 2.13E-42 |
| LRRFIP2   | -0.6058263 | 2.61E-42 |
| LFNG      | -0.4474044 | 3.46E-42 |
| TXN       | -0.5770073 | 4.36E-42 |
| RPS11     | 0.3771038  | 6.84E-42 |
| TTC1      | 0.4037497  | 7.09E-42 |
| PLEKHO1   | -0.5914082 | 7.21E-42 |
| H3F3A     | -0.3697933 | 7.36E-42 |
| PHLDA1    | -0.6492804 | 8.53E-42 |
| CD9       | -0.6701429 | 8.55E-42 |
| ARL4C     | -0.4732219 | 1.27E-41 |
| IGFBP2    | 0.6256122  | 1.49E-41 |
| MIR22HG   | -0.3995892 | 1.52E-41 |
| IFFO2     | -0.4692469 | 1.66E-41 |
| APBB1IP   | 0.4692767  | 1.72E-41 |
| CSNK1D    | -0.5216966 | 2.48E-41 |
| NOL8      | 0.4964878  | 3.09E-41 |
| KLF6      | -0.8423068 | 3.16E-41 |
| TARBP1    | 0.5478536  | 3.80E-41 |
| TRAF4     | -0.5047161 | 3.81E-41 |
| LINC01226 | 0.3313578  | 4.87E-41 |
| ARHGDI1   | -0.5202408 | 5.58E-41 |
| TTC3      | 0.5874334  | 5.59E-41 |
| HSD17B4   | 0.4407155  | 8.07E-41 |
| AGO2      | -0.5428538 | 9.87E-41 |
| NFKBIA    | -1.0302803 | 1.77E-40 |
| IQGAP1    | -0.5223736 | 1.85E-40 |
| ETF1      | -0.6363113 | 1.89E-40 |
| DPYSL3    | -0.2703327 | 2.14E-40 |
| LINC01268 | 0.4363587  | 2.35E-40 |
| TPM4      | -0.6541821 | 2.54E-40 |
| TPPP3     | -0.3329547 | 6.06E-40 |



|          |            |          |
|----------|------------|----------|
| SERPINE1 | -0.3938265 | 1.07E-39 |
| ARL8A    | -0.4947702 | 1.37E-39 |
| TASOR    | 0.4046515  | 1.40E-39 |
| STOML3   | -0.2589197 | 1.84E-39 |
| NFE2L2   | -0.4922044 | 2.29E-39 |
| MAP3K8   | -0.5802278 | 3.07E-39 |
| UBE2H    | -0.5532945 | 4.19E-39 |
| PPP1R16B | -0.2507074 | 5.43E-39 |
| LRPPRC   | 0.4630461  | 5.50E-39 |
| SEC61B   | -0.4817619 | 9.94E-39 |
| SLC20A1  | -0.583456  | 1.13E-38 |
| ARL2     | 0.4362942  | 1.20E-38 |
| PNISR    | 0.5366203  | 1.67E-38 |
| RPL37    | 0.3040759  | 2.49E-38 |
| CYTIP    | -0.5332449 | 2.52E-38 |
| RAD50    | 0.5171434  | 3.31E-38 |
| VAPA     | -0.5576836 | 3.34E-38 |
| HERPUD1  | -0.5087419 | 3.89E-38 |
| DNPH1    | 0.4577625  | 4.01E-38 |
| TMX4     | -0.7296808 | 6.72E-38 |
| MYL12B   | -0.4590654 | 7.63E-38 |
| TNFRSF1A | -0.4818092 | 8.60E-38 |
| FMNL1    | -0.5296618 | 9.31E-38 |
| PTPN6    | -0.5940786 | 9.60E-38 |
| UBE2D1   | -0.5116769 | 1.27E-37 |
| RCSD1    | 0.5138097  | 1.49E-37 |
| MRPS34   | 0.5094458  | 2.27E-37 |
| REXO2    | 0.4197182  | 3.60E-37 |
| CHCHD2   | -0.4481873 | 4.52E-37 |
| ACTG1    | -0.4514185 | 4.53E-37 |
| LST1     | -0.558072  | 5.20E-37 |
| CFAP126  | -0.2016711 | 6.97E-37 |
| LDHB     | 0.4925257  | 7.07E-37 |
| CD84     | 0.4651556  | 8.41E-37 |
| SET      | 0.4700029  | 9.39E-37 |
| MAFF     | -0.5515908 | 1.76E-36 |
| NPDC1    | -0.4636966 | 1.81E-36 |
| CDC42SE1 | -0.567147  | 3.00E-36 |
| ACTN1    | 0.4413068  | 3.28E-36 |
| MCL1     | -0.6960384 | 5.42E-36 |
| H3F3B    | -0.7132198 | 5.55E-36 |
| MARCKSL1 | -0.5994089 | 8.46E-36 |
| YWHAQ    | -0.4941178 | 8.69E-36 |
| MTIF3    | 0.547542   | 9.48E-36 |
| ZFP36    | -0.8025204 | 1.04E-35 |
| PYGL     | 0.4817426  | 1.32E-35 |
| GAPT     | 0.5213686  | 1.74E-35 |
| PSTPIP2  | 0.4871112  | 1.81E-35 |
| HSP90B1  | -0.9279393 | 2.32E-35 |
| TNFAIP2  | -0.6430352 | 2.32E-35 |

|            |            |          |
|------------|------------|----------|
| SYAP1      | -0.8175588 | 2.38E-35 |
| IL1RAP     | -0.5659633 | 2.53E-35 |
| THEMIS2    | -0.5169115 | 3.21E-35 |
| HIST2H2BE  | -0.5126519 | 3.53E-35 |
| TENT5A     | 0.4173048  | 4.40E-35 |
| MT-CYB     | 0.4187455  | 4.72E-35 |
| ARF4       | -0.4743567 | 4.73E-35 |
| ZMYM4      | 0.4181813  | 4.87E-35 |
| PTP4A3     | -0.4382202 | 5.41E-35 |
| SFXN3      | -0.4349944 | 5.96E-35 |
| ATRX       | 0.5699843  | 6.02E-35 |
| RNF19B     | -0.3470818 | 7.79E-35 |
| MIS18BP1   | 0.5468829  | 1.10E-34 |
| HES4       | -0.5173576 | 1.35E-34 |
| RPL31      | 0.3294293  | 1.47E-34 |
| ABRACL     | 0.4305895  | 1.54E-34 |
| FDX1       | -0.4625654 | 1.66E-34 |
| SERTAD1    | -0.4641028 | 2.75E-34 |
| GPATCH2    | -0.4610001 | 3.25E-34 |
| AL355922.1 | 0.3269544  | 3.26E-34 |
| SPNS2      | -0.4572435 | 3.32E-34 |
| PM20D2     | 0.3489306  | 4.28E-34 |
| SRSF6      | 0.5074028  | 4.45E-34 |
| SUB1       | -0.4585105 | 6.77E-34 |
| TFG        | -0.4586121 | 7.59E-34 |
| RNASE2     | 0.6309031  | 1.05E-33 |
| S100A6     | -0.840855  | 1.21E-33 |
| BLVRB      | 0.4367964  | 1.38E-33 |
| RPAP2      | 0.5562298  | 1.54E-33 |
| LDHA       | -0.546952  | 1.60E-33 |
| TRIM73     | 0.3863822  | 1.89E-33 |
| RNASEH2B   | 0.6327498  | 2.41E-33 |
| NARS       | 0.4755526  | 2.53E-33 |
| FUS        | 0.5113834  | 2.54E-33 |
| CMTM6      | -0.4841485 | 2.64E-33 |
| PRKAG2-AS  | 0.2337129  | 2.97E-33 |
| PDCD11     | 0.3383597  | 3.00E-33 |
| LINC00342  | 0.5418145  | 3.22E-33 |
| MAP1LC3B   | -0.5662637 | 3.22E-33 |
| SNX2       | -0.5570395 | 3.52E-33 |
| OMA1       | 0.2188811  | 3.64E-33 |
| SH3BP5     | -0.3082628 | 4.22E-33 |
| GNAI3      | -0.5241011 | 4.82E-33 |
| PRDX3      | 0.4401641  | 4.91E-33 |
| FAM216A    | 0.3776377  | 5.63E-33 |
| CYTL1      | 0.8360609  | 6.42E-33 |
| AC007384.1 | -0.3467484 | 6.65E-33 |
| CHMP6      | -0.3455898 | 7.05E-33 |
| PER2       | -0.4423763 | 9.28E-33 |
| GTF2I      | 0.5269173  | 1.12E-32 |

|          |            |          |
|----------|------------|----------|
| RSRC2    | -0.5368078 | 1.48E-32 |
| EHD1     | -0.4379772 | 1.49E-32 |
| UTP3     | 0.3767315  | 1.70E-32 |
| ACOT7    | -0.3129868 | 1.73E-32 |
| PACSIN2  | -0.4366821 | 2.09E-32 |
| TSG101   | -0.4411351 | 2.25E-32 |
| CLEC12A  | 0.3442791  | 2.44E-32 |
| YWHAH    | -0.5392277 | 2.63E-32 |
| BCL2     | 0.37034    | 2.90E-32 |
| HLA-B    | -0.4646339 | 4.10E-32 |
| CBX3     | 0.4284236  | 4.73E-32 |
| ISOC2    | 0.3254437  | 4.86E-32 |
| LEPROTL1 | -0.4672052 | 5.19E-32 |
| SLC39A3  | 0.4788312  | 6.32E-32 |
| CD83     | -0.4297129 | 6.53E-32 |
| NR3C1    | -0.4779215 | 6.71E-32 |
| SPIN4    | 0.4338707  | 8.77E-32 |
| PTGDS    | 0.8703575  | 1.03E-31 |
| SUPT16H  | 0.4904348  | 1.87E-31 |
| NAA38    | 0.416509   | 1.90E-31 |
| GCSH     | 0.4030037  | 1.94E-31 |
| MSI2     | 0.5698156  | 2.02E-31 |
| NOP56    | 0.5826406  | 2.51E-31 |
| GPATCH11 | -0.468114  | 2.59E-31 |
| MRPL33   | 0.4266489  | 2.90E-31 |
| GNAI2    | -0.4855576 | 3.42E-31 |
| PABPC1   | 0.4220794  | 3.80E-31 |
| C1QBP    | 0.4851443  | 4.19E-31 |
| RIOK3    | -0.4870801 | 4.76E-31 |
| BCL7B    | -0.4183492 | 6.61E-31 |
| RHOF     | -0.4850367 | 6.61E-31 |
| SRM      | 0.5217015  | 8.95E-31 |
| TRIM8    | -0.4917448 | 8.97E-31 |
| CCT5     | 0.4538808  | 1.15E-30 |
| PARP4    | 0.3920982  | 1.44E-30 |
| ARG2     | -0.2553397 | 1.68E-30 |
| VASP     | -0.4865699 | 1.82E-30 |
| NRDC     | 0.4463067  | 2.05E-30 |
| FAM214B  | -0.3230689 | 2.41E-30 |
| TSEN34   | -0.4138541 | 3.77E-30 |
| PPP2CA   | -0.4058733 | 4.36E-30 |
| FIRRE    | 0.2836104  | 4.52E-30 |
| MRPL3    | 0.4020159  | 4.61E-30 |
| MCRIP2   | 0.351326   | 6.62E-30 |
| ALOX5AP  | -0.5452218 | 6.80E-30 |
| UBE2D2   | -0.4162559 | 7.32E-30 |
| RFX2     | -0.4163138 | 7.46E-30 |
| IFI16    | 0.6099459  | 7.83E-30 |
| GPR174   | 0.3533733  | 8.01E-30 |
| GAPDH    | -0.3211698 | 9.60E-30 |

|           |            |          |
|-----------|------------|----------|
| H19       | -0.7186365 | 1.08E-29 |
| HNRNPUL1  | -0.4987217 | 1.10E-29 |
| MTMR6     | -0.3674691 | 1.13E-29 |
| ZNF487    | -0.2999361 | 1.31E-29 |
| HERC2     | 0.3853607  | 1.77E-29 |
| ANXA11    | -0.398664  | 1.89E-29 |
| YTHDC1    | 0.3850192  | 2.16E-29 |
| LDLR      | -0.3339928 | 2.48E-29 |
| WDR3      | 0.2504053  | 2.55E-29 |
| HNRNPA1   | -0.4072769 | 2.67E-29 |
| PFKFB3    | -0.3498834 | 3.28E-29 |
| NPC2      | 0.4063589  | 4.26E-29 |
| NEDD8     | 0.3873428  | 4.72E-29 |
| ELF1      | -0.5173013 | 6.27E-29 |
| TMEM14C   | 0.3997617  | 8.17E-29 |
| RHOC      | -0.4354427 | 9.91E-29 |
| CASP8     | -0.483866  | 1.02E-28 |
| UBTF      | 0.3813886  | 1.05E-28 |
| CHD2      | -0.551567  | 1.13E-28 |
| RBM3      | -0.419865  | 1.26E-28 |
| DAAM1     | -0.5089886 | 1.29E-28 |
| RUFY1     | 0.3928805  | 1.32E-28 |
| WDFY2     | -0.6144689 | 1.40E-28 |
| NREP      | 0.4225223  | 1.44E-28 |
| VEGFB     | 0.3162413  | 1.47E-28 |
| MPHOSPH8  | 0.4034055  | 1.54E-28 |
| LIMD2     | -0.466651  | 1.59E-28 |
| TMEM161B  | 0.4935299  | 1.80E-28 |
| MAPK1IP1L | -0.4563797 | 2.10E-28 |
| UQCR10    | 0.3914008  | 2.22E-28 |
| CD53      | -0.4325378 | 2.26E-28 |
| HNRNPAB   | 0.5298004  | 2.63E-28 |
| PYURF     | 0.4043256  | 2.73E-28 |
| RBM8A     | -0.389449  | 2.97E-28 |
| CDK6      | 0.4285245  | 3.56E-28 |
| ARL6IP5   | 0.5473924  | 4.18E-28 |
| CST7      | 0.5428958  | 4.37E-28 |
| U2SURP    | 0.4476832  | 5.01E-28 |
| RRAGC     | -0.4258962 | 5.06E-28 |
| RBM28     | 0.3921197  | 5.07E-28 |
| PNMA1     | -0.3113951 | 6.10E-28 |
| EPRS      | 0.42992    | 6.38E-28 |
| ATP8B4    | 0.4874078  | 6.67E-28 |
| PDCD5     | 0.4396378  | 6.84E-28 |
| RNF11     | -0.3630342 | 7.03E-28 |
| OPN3      | 0.2485311  | 7.30E-28 |
| UBE2N     | -0.4316951 | 8.50E-28 |
| LAPTM5    | -0.4853274 | 1.03E-27 |
| PARP1     | 0.4437509  | 1.07E-27 |
| IFI30     | -0.6519375 | 1.12E-27 |

|            |            |          |
|------------|------------|----------|
| FAM122C    | -0.3486064 | 1.22E-27 |
| TRMT10C    | 0.3934618  | 1.33E-27 |
| INKA2      | -0.2911967 | 1.33E-27 |
| PRKD2      | -0.3399275 | 1.35E-27 |
| GAS5       | 0.4593563  | 1.52E-27 |
| RPL36      | 0.2490545  | 1.59E-27 |
| MAPK1      | -0.425922  | 1.64E-27 |
| PLEKHF1    | -0.3251175 | 1.64E-27 |
| CD300A     | -0.3897043 | 1.67E-27 |
| MAP1S      | -0.4238352 | 1.80E-27 |
| EDEM3      | 0.3385141  | 1.84E-27 |
| LUZP1      | -0.4816989 | 1.88E-27 |
| HOXB2      | -0.5177517 | 2.25E-27 |
| CYLD       | -0.453583  | 2.26E-27 |
| PPP4R3B    | 0.4312014  | 2.89E-27 |
| ALG8       | 0.1897058  | 2.98E-27 |
| DAB2       | 0.2605743  | 3.70E-27 |
| MTAP       | 0.3206512  | 4.53E-27 |
| RPL35A     | 0.2578472  | 5.24E-27 |
| DOK2       | -0.3961579 | 5.81E-27 |
| GPATCH4    | 0.3622565  | 6.05E-27 |
| UBE2D3     | -0.3700903 | 7.61E-27 |
| PPP6R1     | -0.3981321 | 7.66E-27 |
| CITED4     | 0.2357935  | 8.52E-27 |
| ELL2       | -0.3606303 | 8.98E-27 |
| ENSA       | -0.4024998 | 9.23E-27 |
| YBX3       | -0.594525  | 1.19E-26 |
| TMPO       | 0.4413042  | 1.28E-26 |
| SPI1       | -0.5094172 | 1.39E-26 |
| OSGIN2     | -0.3931956 | 1.54E-26 |
| NUCKS1     | 0.4782493  | 1.56E-26 |
| TMCC1-AS1  | 0.3224042  | 1.63E-26 |
| RAB14      | -0.4296358 | 1.67E-26 |
| MT-CO3     | 0.3002419  | 2.47E-26 |
| MLF2       | -0.2913322 | 2.53E-26 |
| DUSP14     | -0.4091606 | 2.66E-26 |
| RRP12      | -0.4740455 | 2.80E-26 |
| USP48      | 0.3556346  | 2.86E-26 |
| PRKCQ-AS1  | 0.3008669  | 3.12E-26 |
| N4BP3      | -0.2850269 | 3.20E-26 |
| EHMT2      | 0.2936873  | 3.39E-26 |
| CD58       | -0.4423505 | 3.59E-26 |
| PUS7L      | 0.2577772  | 3.65E-26 |
| EXOSC6     | 0.337063   | 3.68E-26 |
| TWF2       | -0.467065  | 3.92E-26 |
| GGCT       | 0.433065   | 4.29E-26 |
| AC104083.1 | 0.2298882  | 5.14E-26 |
| CDC42EP3   | -0.479515  | 5.71E-26 |
| RUVBL1     | 0.3459339  | 6.16E-26 |
| HTR1F      | 0.2420243  | 6.32E-26 |

|            |            |          |
|------------|------------|----------|
| APRT       | 0.3745146  | 6.35E-26 |
| CFP        | -0.3482519 | 8.25E-26 |
| AGPAT5     | 0.3777904  | 9.90E-26 |
| MKNK2      | -0.4170284 | 1.02E-25 |
| WDR12      | 0.3290065  | 1.02E-25 |
| BZW2       | 0.4159864  | 1.03E-25 |
| RIPOR2     | -0.443415  | 1.10E-25 |
| PAK2       | 0.3527014  | 1.22E-25 |
| RPL13A     | 0.2397577  | 1.28E-25 |
| AC007952.4 | 0.4587509  | 1.41E-25 |
| ST13       | 0.3802106  | 1.56E-25 |
| JUP        | -0.4043263 | 1.75E-25 |
| M6PR       | 0.387853   | 1.89E-25 |
| IRF8       | -0.3640664 | 1.92E-25 |
| CEP290     | 0.3955645  | 2.02E-25 |
| MFSD1      | 0.3868786  | 2.22E-25 |
| RPL37A     | 0.2744683  | 2.64E-25 |
| RPS27L     | 0.4456116  | 2.67E-25 |
| SKAP2      | 0.508441   | 2.99E-25 |
| LRRC8C     | -0.3996379 | 3.12E-25 |
| PTPRC      | -0.4872549 | 3.46E-25 |
| RBM14      | -0.4296195 | 3.77E-25 |
| TOP2B      | 0.5177091  | 4.23E-25 |
| ZMIZ1      | -0.457919  | 4.36E-25 |
| DDX46      | 0.4155784  | 4.62E-25 |
| DLD        | -0.4701308 | 4.78E-25 |
| ARHGAP22   | 0.2987403  | 5.15E-25 |
| SMAD3      | -0.3877674 | 5.44E-25 |
| VPS37B     | -0.3986036 | 5.71E-25 |
| RPS9       | -0.2419936 | 5.84E-25 |
| MALT1      | -0.3915809 | 7.17E-25 |
| ACADM      | 0.413549   | 7.20E-25 |
| RABAC1     | -0.3641373 | 9.77E-25 |
| CBX1       | 0.3217032  | 1.10E-24 |
| RPL34      | 0.2460945  | 1.12E-24 |
| CYTOR      | -0.4735267 | 1.21E-24 |
| SNAI3      | -0.4524734 | 1.39E-24 |
| MT-ATP6    | 0.2741588  | 1.57E-24 |
| MYCBP2     | 0.4532995  | 1.70E-24 |
| OCIAD1     | 0.3798974  | 1.82E-24 |
| THUMP3-A   | -0.358573  | 1.93E-24 |
| NEU4       | -0.2445856 | 2.17E-24 |
| MRPS12     | 0.3611981  | 2.31E-24 |
| RPS28      | 0.2264395  | 2.81E-24 |
| TMEM63A    | -0.3782149 | 3.10E-24 |
| TLE5       | -0.4351137 | 3.21E-24 |
| KANK1      | 0.190365   | 3.43E-24 |
| RNF10      | -0.3737844 | 3.78E-24 |
| APEX1      | 0.4226282  | 3.90E-24 |
| MYCN       | 0.2758208  | 4.15E-24 |

|           |            |          |
|-----------|------------|----------|
| FHL3      | -0.3598817 | 4.18E-24 |
| FN1       | 0.1256373  | 4.24E-24 |
| CHD1      | -0.559504  | 4.28E-24 |
| PCF11     | 0.4403186  | 4.47E-24 |
| SNRPE     | 0.3887782  | 4.63E-24 |
| NOLC1     | 0.3704232  | 4.80E-24 |
| CNTRL     | 0.4100993  | 4.87E-24 |
| OSER1     | -0.336417  | 5.14E-24 |
| PTPRA     | 0.3543579  | 5.18E-24 |
| NPM1      | 0.3400377  | 5.33E-24 |
| MFSD6     | -0.3895309 | 5.94E-24 |
| TTC17     | 0.3907198  | 6.21E-24 |
| LYAR      | 0.2784104  | 6.30E-24 |
| POLR3K    | 0.2401213  | 6.94E-24 |
| FCER1G    | -0.510657  | 7.92E-24 |
| CYBA      | -0.3783595 | 8.10E-24 |
| RBM12B    | 0.331219   | 8.41E-24 |
| PLEKHO2   | -0.3781697 | 9.28E-24 |
| MRPS26    | 0.3669248  | 1.02E-23 |
| ARHGEF7   | -0.3304538 | 1.08E-23 |
| SMC2      | 0.3435904  | 1.22E-23 |
| TRAF5     | -0.3780219 | 1.22E-23 |
| C11orf68  | -0.26845   | 1.34E-23 |
| FRAT2     | 0.2439079  | 1.39E-23 |
| CAT       | 0.4467759  | 1.40E-23 |
| SERF2     | -0.2736622 | 1.41E-23 |
| ICAM1     | -0.2627676 | 1.51E-23 |
| VDAC3     | 0.3599857  | 1.53E-23 |
| STRAP     | -0.3871868 | 1.75E-23 |
| RIPK2     | -0.390782  | 1.77E-23 |
| MGST2     | 0.3910179  | 1.92E-23 |
| EMC3      | -0.3915373 | 2.11E-23 |
| LINC-PINT | -0.4424347 | 2.17E-23 |
| XAF1      | 0.3163798  | 2.34E-23 |
| TPM3      | -0.3951619 | 2.90E-23 |
| NCOA3     | -0.4786993 | 3.06E-23 |
| FAM217B   | 0.3011496  | 3.09E-23 |
| H2AFJ     | -0.4449077 | 3.33E-23 |
| TFAP4     | 0.1608797  | 3.47E-23 |
| SH2D2A    | -0.2408885 | 3.49E-23 |
| RPL36AL   | -0.3015458 | 3.66E-23 |
| RPL30     | 0.2085428  | 3.67E-23 |
| FABP5     | 0.5013611  | 3.79E-23 |
| STK24     | -0.3675779 | 3.80E-23 |
| EIF5      | -0.478268  | 3.82E-23 |
| HMGB1     | 0.4267276  | 4.06E-23 |
| SLC25A19  | 0.2002508  | 4.13E-23 |
| DUSP23    | 0.3067648  | 4.21E-23 |
| N4BP2     | -0.4709413 | 4.65E-23 |
| MIER1     | -0.4270949 | 4.79E-23 |

|           |            |          |
|-----------|------------|----------|
| RPS20     | 0.3272493  | 5.16E-23 |
| PIGM      | 0.2666526  | 5.20E-23 |
| HIST1H1C  | -0.8248726 | 5.35E-23 |
| MAP7      | 0.385792   | 5.60E-23 |
| STK40     | -0.3195348 | 5.72E-23 |
| FAM83G    | -0.205696  | 6.05E-23 |
| IGSF10    | 0.3203951  | 6.55E-23 |
| SOX4      | 0.7791989  | 6.78E-23 |
| TFPI      | -0.4229401 | 6.82E-23 |
| ERF       | -0.3653253 | 6.91E-23 |
| CHST12    | 0.3828709  | 7.07E-23 |
| SLC39A4   | 0.2614693  | 7.25E-23 |
| ARHGAP27  | -0.4353999 | 7.30E-23 |
| BOD1L1    | 0.4815339  | 7.30E-23 |
| DDX1      | 0.3243626  | 7.48E-23 |
| YRDC      | 0.2284378  | 7.64E-23 |
| PDCD10    | -0.4145055 | 7.90E-23 |
| TCF7L2    | -0.3708399 | 8.02E-23 |
| TBCA      | 0.3528546  | 8.18E-23 |
| PSMD12    | -0.4183853 | 8.19E-23 |
| KRT10     | 0.3702136  | 8.39E-23 |
| NOP10     | -0.3679934 | 8.99E-23 |
| ICOSLG    | -0.2515752 | 9.54E-23 |
| EBPL      | 0.379804   | 1.17E-22 |
| LYRM7     | 0.361022   | 1.20E-22 |
| USP14     | -0.4132619 | 1.24E-22 |
| PTPN1     | -0.4528043 | 1.44E-22 |
| NUFIP2    | 0.4333327  | 1.68E-22 |
| GFOD1     | -0.3791466 | 1.70E-22 |
| CAPNS1    | -0.4042827 | 1.99E-22 |
| FTX       | 0.4899256  | 2.02E-22 |
| PPP6R3    | -0.296617  | 2.08E-22 |
| FHL1      | -0.2714512 | 2.97E-22 |
| ARID3A    | -0.4789802 | 3.02E-22 |
| PTPRE     | -0.4398522 | 3.04E-22 |
| HLA-A     | -0.3737763 | 3.16E-22 |
| DMAC1     | 0.3808127  | 3.56E-22 |
| ST6GALNAC | -0.3176061 | 3.69E-22 |
| FOSL2     | -0.4562634 | 3.70E-22 |
| CHD4      | 0.3896321  | 3.85E-22 |
| RPL12     | 0.2516844  | 4.08E-22 |
| C11orf54  | 0.2946912  | 4.20E-22 |
| CDC42EP2  | -0.1447938 | 4.45E-22 |
| GTF2A2    | 0.3789462  | 4.85E-22 |
| HMGA1     | -0.4583345 | 5.36E-22 |
| MRPL34    | 0.3968592  | 5.74E-22 |
| COMMD6    | 0.3862432  | 6.32E-22 |
| ATF3      | -0.5274778 | 6.36E-22 |
| EIF4A2    | 0.395858   | 6.75E-22 |
| FAM177A1  | -0.3572201 | 7.32E-22 |



|          |            |          |
|----------|------------|----------|
| ATM      | 0.3767314  | 7.45E-22 |
| SLC9A3R2 | -0.4889479 | 8.54E-22 |
| AIMP1    | 0.3673205  | 8.56E-22 |
| TMA16    | 0.3709976  | 9.83E-22 |
| FKBP4    | 0.3486638  | 1.07E-21 |
| SLBP     | -0.3154728 | 1.11E-21 |
| SELENOP  | 0.5083611  | 1.17E-21 |
| IQCH-AS1 | 0.2002427  | 1.27E-21 |
| PDXK     | -0.3333023 | 1.38E-21 |
| CSTB     | -0.3816028 | 1.43E-21 |
| CEP63    | 0.3216339  | 1.46E-21 |
| CELF1    | -0.4278301 | 1.48E-21 |
| CNOT2    | -0.3065695 | 1.61E-21 |
| ZBTB44   | 0.3547212  | 1.69E-21 |
| KRCC1    | 0.4101959  | 1.78E-21 |
| ERG      | 0.4063182  | 1.83E-21 |
| C16orf74 | 0.2025817  | 2.03E-21 |
| NDUFB3   | 0.3116833  | 2.09E-21 |
| CCDC12   | -0.3123557 | 2.29E-21 |
| ACIN1    | 0.3482844  | 2.30E-21 |
| Z97192.3 | 0.2718019  | 2.37E-21 |
| COA6     | 0.2904616  | 2.39E-21 |
| CEBPG    | -0.3583098 | 2.41E-21 |
| IRAK2    | -0.1486419 | 2.72E-21 |
| STK17A   | -0.3553945 | 2.85E-21 |
| ARRDC2   | -0.3399825 | 3.11E-21 |
| ST8SIA6  | 0.3293706  | 3.17E-21 |
| TMEM14B  | 0.3314447  | 3.21E-21 |
| SPAG9    | -0.4126671 | 3.40E-21 |
| NUDCD1   | 0.2305308  | 3.45E-21 |
| INSIG1   | -0.459844  | 3.64E-21 |
| ENDOG    | 0.380108   | 3.70E-21 |
| ZRANB2   | 0.3961963  | 3.72E-21 |
| FOSL1    | -0.2427579 | 3.78E-21 |
| HDDC2    | 0.2660292  | 3.79E-21 |
| POP5     | 0.2808732  | 4.87E-21 |
| TREML2   | -0.2000654 | 5.08E-21 |
| NME1     | 0.5013788  | 5.75E-21 |
| CFAP97   | 0.3569079  | 5.79E-21 |
| KCNN4    | -0.3652151 | 5.83E-21 |
| C6orf226 | -0.2832212 | 6.47E-21 |
| ITM2C    | -0.4767116 | 6.58E-21 |
| PRMT2    | -0.3532179 | 8.35E-21 |
| MSRB3    | 0.3889059  | 8.62E-21 |
| IP6K2    | -0.3237663 | 8.83E-21 |
| HLTF     | 0.3180711  | 9.74E-21 |
| CCDC85B  | 0.4250601  | 1.04E-20 |
| WASF2    | -0.3444825 | 1.05E-20 |
| ZFPM1    | 0.2270353  | 1.10E-20 |
| NTPCR    | 0.2356354  | 1.14E-20 |

|           |            |          |
|-----------|------------|----------|
| LMAN1     | 0.2886224  | 1.22E-20 |
| SDCBP     | -0.4935934 | 1.24E-20 |
| PAQR8     | -0.3270942 | 1.27E-20 |
| TMCO1     | 0.387972   | 1.33E-20 |
| EBNA1BP2  | 0.3266279  | 1.44E-20 |
| HBP1      | -0.3573504 | 1.45E-20 |
| ZNF286A   | 0.1700283  | 1.45E-20 |
| DDX18     | 0.3780656  | 1.47E-20 |
| SLC44A1   | 0.3031831  | 1.56E-20 |
| ALDH5A1   | 0.2117262  | 1.73E-20 |
| RIN3      | -0.3456474 | 1.76E-20 |
| CENPJ     | 0.2921682  | 1.80E-20 |
| DEPTOR    | 0.1746712  | 1.97E-20 |
| RNF166    | -0.430477  | 1.98E-20 |
| HP1BP3    | 0.4047067  | 2.14E-20 |
| SPON2     | -0.3313726 | 2.34E-20 |
| ZNF706    | -0.3238128 | 2.41E-20 |
| CORO1C    | -0.3647115 | 2.57E-20 |
| MEX3B     | 0.2292399  | 2.67E-20 |
| HPF1      | 0.2566697  | 2.73E-20 |
| DCTN6     | -0.377484  | 2.88E-20 |
| ARID3B    | -0.3357898 | 2.94E-20 |
| NXT2      | 0.2285857  | 3.10E-20 |
| ARF1      | -0.3720396 | 3.16E-20 |
| NDUFAF2   | 0.2853167  | 3.28E-20 |
| ZNRF1     | 0.3586576  | 3.29E-20 |
| IRF2BPL   | -0.3840874 | 3.87E-20 |
| PSMB8-AS1 | 0.2445635  | 3.91E-20 |
| PTER      | 0.1887132  | 4.07E-20 |
| IL4I1     | -0.1588595 | 4.25E-20 |
| PLAUR     | -0.3507594 | 4.37E-20 |
| ZNF804A   | 0.2035091  | 4.63E-20 |
| CREM      | -0.2892761 | 4.65E-20 |
| LMNB1     | 0.3288285  | 4.71E-20 |
| TM7SF3    | 0.4529408  | 5.05E-20 |
| STX1A     | -0.1486448 | 5.11E-20 |
| EEF1A1    | -0.2377427 | 5.27E-20 |
| IVNS1ABP  | -0.302702  | 5.30E-20 |
| SERINC1   | -0.3847555 | 5.78E-20 |
| CD164     | 0.5649357  | 5.78E-20 |
| TRIM25    | 0.2206703  | 5.90E-20 |
| MSRB2     | 0.3136392  | 6.16E-20 |
| GUCY1B1   | 0.2233195  | 6.23E-20 |
| RXYLT1    | 0.2874018  | 6.77E-20 |
| GALNT1    | 0.3045592  | 7.40E-20 |
| MRPS33    | 0.4026617  | 7.76E-20 |
| CSF1R     | 0.2115503  | 7.90E-20 |
| MAPKAPK2  | -0.3236897 | 8.16E-20 |
| AKIRIN2   | -0.345272  | 8.66E-20 |
| ARPP19    | -0.3664807 | 8.67E-20 |

|            |            |          |
|------------|------------|----------|
| PPA2       | 0.3194576  | 8.86E-20 |
| CKS1B      | 0.1974897  | 9.51E-20 |
| RBIS       | 0.3008234  | 9.61E-20 |
| HIVEP1     | -0.3338444 | 1.02E-19 |
| DCP1A      | -0.3169916 | 1.04E-19 |
| UBE2V2     | 0.2655042  | 1.06E-19 |
| RAB5A      | -0.3590012 | 1.07E-19 |
| APOL4      | 0.145934   | 1.12E-19 |
| IDH1       | 0.3363838  | 1.26E-19 |
| MDN1       | 0.332447   | 1.27E-19 |
| MRPS31     | 0.2729298  | 1.29E-19 |
| NFKBID     | -0.3613041 | 1.33E-19 |
| IQGAP2     | 0.3843312  | 1.33E-19 |
| DDX10      | 0.29967    | 1.37E-19 |
| RHOH       | -0.3232676 | 1.44E-19 |
| CMBL       | 0.2660367  | 1.44E-19 |
| HACD3      | 0.2566404  | 1.73E-19 |
| PAXIP1-AS1 | 0.2357775  | 1.76E-19 |
| SAMD9      | 0.2753064  | 1.96E-19 |
| SETDB2     | 0.321035   | 1.96E-19 |
| CBR1       | 0.3155954  | 2.22E-19 |
| MAP1LC3A   | -0.264213  | 2.33E-19 |
| ID3        | -0.2798301 | 2.37E-19 |
| NR1H2      | -0.3202514 | 2.59E-19 |
| RAB8B      | -0.3379146 | 3.54E-19 |
| MFSD14A    | -0.2668074 | 3.67E-19 |
| EWSR1      | -0.3861001 | 3.70E-19 |
| GGNBP2     | -0.3465782 | 4.10E-19 |
| TMX1       | 0.3482     | 4.28E-19 |
| TESC       | 0.3294924  | 4.39E-19 |
| ARPC5L     | -0.3702926 | 4.68E-19 |
| NDE1       | -0.3530326 | 5.03E-19 |
| TFEC       | 0.3727728  | 5.06E-19 |
| FAM174C    | 0.284635   | 5.14E-19 |
| METAP2     | 0.3438671  | 5.20E-19 |
| MGAT1      | -0.3571149 | 5.64E-19 |
| SLC43A3    | -0.3038141 | 5.65E-19 |
| MORF4L2    | -0.3760059 | 5.76E-19 |
| ATP5PD     | 0.3304772  | 5.83E-19 |
| PRKACB     | 0.4336884  | 6.19E-19 |
| MTMR12     | -0.2603512 | 6.54E-19 |
| LRMDA      | 0.2483863  | 6.73E-19 |
| EIF3I      | -0.3132967 | 7.13E-19 |
| MCOLN1     | 0.1469446  | 7.60E-19 |
| SLC6A6     | -0.3356802 | 8.28E-19 |
| PLCB1      | -0.3991311 | 8.95E-19 |
| ZNF480     | 0.2335256  | 9.35E-19 |
| TIMM13     | 0.3611069  | 9.98E-19 |
| GADD45B    | -0.4539738 | 1.12E-18 |
| ZNF737     | 0.2408324  | 1.28E-18 |

|          |            |          |
|----------|------------|----------|
| LRPAP1   | 0.3732531  | 1.28E-18 |
| NDUFB10  | 0.3240295  | 1.28E-18 |
| METTL5   | 0.2719683  | 1.29E-18 |
| ZBTB21   | -0.3147465 | 1.33E-18 |
| SMIM12   | -0.252236  | 1.43E-18 |
| ITSN2    | -0.3204479 | 1.52E-18 |
| ZNF138   | 0.196127   | 1.62E-18 |
| PSMA6    | -0.3041649 | 1.63E-18 |
| CRK      | -0.2958233 | 1.70E-18 |
| TOB2     | -0.3365098 | 1.72E-18 |
| FGR      | -0.2400005 | 1.76E-18 |
| ARRB1    | 0.2413929  | 2.01E-18 |
| STXBP5   | 0.356117   | 2.05E-18 |
| NSA2     | 0.3539068  | 2.15E-18 |
| OSBPL1A  | 0.2613075  | 2.38E-18 |
| HCG18    | 0.3888863  | 2.45E-18 |
| WDR1     | -0.3363316 | 2.50E-18 |
| GAS7     | -0.3221601 | 2.61E-18 |
| PLEKHH3  | -0.1841    | 2.98E-18 |
| RIPOR1   | -0.2680471 | 3.00E-18 |
| MRPL40   | 0.2270617  | 3.06E-18 |
| PDIA3    | -0.3345087 | 3.14E-18 |
| SPNS3    | -0.4118006 | 3.26E-18 |
| SMARCC1  | 0.3788324  | 3.41E-18 |
| FADD     | -0.2577909 | 3.94E-18 |
| GMFG     | 0.2788221  | 4.17E-18 |
| HADHA    | 0.3446274  | 4.45E-18 |
| HMGN3    | 0.2990627  | 4.52E-18 |
| HAT1     | -0.3426658 | 4.54E-18 |
| ZNF605   | 0.1745437  | 4.57E-18 |
| ADGRG6   | 0.2609946  | 4.95E-18 |
| ASAH1    | 0.4259613  | 5.06E-18 |
| PFN1     | -0.4515162 | 5.10E-18 |
| ACSM3    | 0.3921876  | 5.56E-18 |
| USP6NL   | -0.3394786 | 5.85E-18 |
| ZNF891   | 0.2440662  | 6.37E-18 |
| DHX33    | 0.1745686  | 6.75E-18 |
| ATP2A2   | -0.3647974 | 7.01E-18 |
| TMEM106B | 0.294086   | 7.28E-18 |
| SH3BP2   | -0.4219726 | 8.08E-18 |
| MTIF2    | 0.2472185  | 8.16E-18 |
| RNF130   | 0.3405472  | 8.25E-18 |
| RGL4     | -0.1834243 | 8.92E-18 |
| UBE2J1   | -0.3600694 | 9.03E-18 |
| PIGF     | 0.2685368  | 1.11E-17 |
| PAIP2    | -0.3672404 | 1.13E-17 |
| DNAJB11  | -0.2668887 | 1.17E-17 |
| C1orf56  | -0.4204909 | 1.18E-17 |
| SH3GLB1  | -0.3925231 | 1.29E-17 |
| TOMM5    | 0.3510053  | 1.32E-17 |

|            |            |          |
|------------|------------|----------|
| DKC1       | 0.3325311  | 1.42E-17 |
| LSM2       | 0.333478   | 1.45E-17 |
| CDK9       | -0.3401041 | 1.55E-17 |
| NFKB2      | -0.2744538 | 1.55E-17 |
| AC027601.6 | -0.3317267 | 1.58E-17 |
| TUBB2A     | -0.1598446 | 1.59E-17 |
| SLC5A3     | -0.4188395 | 1.60E-17 |
| TNFAIP8L1  | -0.235016  | 1.68E-17 |
| APAF1      | 0.2370623  | 1.82E-17 |
| MGA        | 0.2755897  | 1.84E-17 |
| TP53       | 0.2567551  | 1.87E-17 |
| IST1       | -0.3427937 | 1.87E-17 |
| RPL5       | 0.2050314  | 1.88E-17 |
| ETFB       | -0.3585218 | 2.01E-17 |
| NCF4       | 0.3756405  | 2.02E-17 |
| SPATA2L    | -0.2028305 | 2.07E-17 |
| ANKLE1     | 0.1139983  | 2.22E-17 |
| DDIT3      | -0.3319824 | 2.26E-17 |
| TAPBP      | -0.3550463 | 2.30E-17 |
| REPIN1     | -0.321182  | 2.38E-17 |
| MLH3       | 0.248683   | 2.48E-17 |
| PARN       | 0.1758089  | 2.54E-17 |
| SGTA       | -0.2776564 | 2.59E-17 |
| TXNDC5     | 0.2391429  | 2.60E-17 |
| FAM49B     | -0.3066641 | 2.67E-17 |
| AK2        | 0.3272528  | 2.67E-17 |
| APOLD1     | 0.1770496  | 2.70E-17 |
| DEDD2      | -0.3720239 | 2.81E-17 |
| GRASP      | -0.1872928 | 2.82E-17 |
| LYZ        | 0.3652751  | 2.94E-17 |
| GRK3       | 0.1975886  | 2.98E-17 |
| C15orf39   | -0.3234058 | 3.19E-17 |
| RIT1       | -0.3043854 | 3.40E-17 |
| RB1CC1     | -0.3686699 | 3.56E-17 |
| TIMMDC1    | 0.2925588  | 3.80E-17 |
| ERH        | 0.3376241  | 3.92E-17 |
| LRRC8A     | -0.3057234 | 4.07E-17 |
| TOMM7      | 0.3277133  | 4.08E-17 |
| DEK        | 0.3530254  | 4.11E-17 |
| PDLIM4     | -0.1908432 | 4.22E-17 |
| UQCC2      | 0.294825   | 4.33E-17 |
| USP4       | -0.3250888 | 4.50E-17 |
| CYP7B1     | 0.1809007  | 4.65E-17 |
| RBBP4      | 0.3572701  | 4.68E-17 |
| SUDS3      | 0.2521929  | 4.71E-17 |
| ARRDC3     | -0.3466379 | 4.93E-17 |
| RBM17      | -0.3115882 | 5.03E-17 |
| HSPA8      | 0.4183792  | 5.07E-17 |
| SRC        | -0.217969  | 5.76E-17 |
| CCL5       | -0.5567656 | 6.15E-17 |

|            |            |           |
|------------|------------|-----------|
| ENTR1      | 0.2156918  | 6.56E-17  |
| TOMM6      | 0.3572791  | 6.57E-17  |
| THOC7      | 0.3350589  | 7.78E-17  |
| SLC39A10   | 0.3032509  | 7.81E-17  |
| CFAP36     | 0.3883647  | 8.05E-17  |
| PPCDC      | -0.2499983 | 8.10E-17  |
| KIF9       | -0.3157065 | 8.19E-17  |
| MGRN1      | -0.2958776 | 8.21E-17  |
| COL24A1    | 0.3674742  | 8.31E-17  |
| ATP5PF     | 0.3010343  | 8.63E-17  |
| UNC5B      | -0.2668532 | 8.71E-17  |
| ZNF141     | 0.2964151  | 8.86E-17  |
| CYB5A      | 0.2389748  | 9.79E-17  |
| CAD        | 0.1606013  | 9.94E-17  |
| AL627171.2 | 0.3474129  | 1.036E-16 |
| CRTAP      | 0.319809   | 1.068E-16 |
| PPP1R10    | 0.4080217  | 1.11E-16  |
| RC3H1      | -0.3767139 | 1.11E-16  |
| MESP1      | 0.1192694  | 1.129E-16 |
| ITGB3BP    | 0.2342694  | 1.13E-16  |
| ME2        | 0.3658673  | 1.289E-16 |
| PWWP3A     | 0.2378857  | 1.319E-16 |
| TMEM131    | 0.2341205  | 1.329E-16 |
| NDUFAF8    | 0.3579435  | 1.35E-16  |
| ADRB1      | 0.2442236  | 1.441E-16 |
| RNF126     | -0.3111259 | 1.489E-16 |
| CLEC2B     | -0.4369636 | 1.528E-16 |
| DUSP18     | -0.2676561 | 1.539E-16 |
| DUSP10     | -0.3078919 | 1.677E-16 |
| CIAO2A     | 0.2869661  | 1.704E-16 |
| C11orf74   | 0.2834003  | 1.707E-16 |
| PHF14      | 0.3522155  | 2.032E-16 |
| FAM102B    | -0.2393607 | 2.068E-16 |
| IMPACT     | 0.1991677  | 2.072E-16 |
| TRIB1      | -0.3056451 | 2.133E-16 |
| CAPZB      | -0.2491752 | 2.257E-16 |
| UBE2Q2     | -0.3593331 | 2.279E-16 |
| ARID4A     | -0.4382921 | 2.36E-16  |
| ZNF66      | 0.247188   | 2.429E-16 |
| KCNE3      | 0.2296369  | 2.534E-16 |
| UQCRFS1    | -0.3350916 | 2.557E-16 |
| RHEX       | 0.4012363  | 2.689E-16 |
| ARMCX3     | -0.4418261 | 2.744E-16 |
| COA4       | 0.3783722  | 2.813E-16 |
| NOP14      | 0.3239902  | 2.849E-16 |
| TBCK       | 0.1636512  | 2.86E-16  |
| TNFRSF1B   | -0.2993906 | 2.92E-16  |
| TESPA1     | 0.3395122  | 2.958E-16 |
| VPS13C     | 0.3877718  | 3.038E-16 |
| RPS21      | 0.1937834  | 3.058E-16 |

|            |            |           |
|------------|------------|-----------|
| YWHAG      | -0.3800985 | 3.266E-16 |
| B3GNT8     | -0.2188084 | 3.331E-16 |
| PCMTD1     | 0.3029866  | 3.445E-16 |
| SDHAF3     | 0.2148215  | 3.499E-16 |
| CYSLTR1    | 0.3431927  | 3.752E-16 |
| ZNF276     | -0.2961648 | 4.026E-16 |
| NAB2       | -0.2404592 | 4.22E-16  |
| ADAM8      | -0.3477243 | 4.352E-16 |
| BRAF       | -0.3203897 | 4.369E-16 |
| GPSM2      | 0.2111491  | 4.483E-16 |
| RFXAP      | 0.1226111  | 4.513E-16 |
| F11R       | -0.3580706 | 4.862E-16 |
| BRD7       | 0.3525557  | 5.854E-16 |
| NEDD9      | -0.3377711 | 6.009E-16 |
| CD37       | -0.3380507 | 6.069E-16 |
| RPL36A     | 0.2062346  | 6.121E-16 |
| FAM210B    | 0.2124634  | 6.33E-16  |
| GLUL       | -0.4961193 | 6.945E-16 |
| CCDC6      | -0.325588  | 7.413E-16 |
| SIGIRR     | -0.2958714 | 7.836E-16 |
| HSDL2      | 0.2249582  | 7.882E-16 |
| LIPT1      | 0.1654945  | 8.661E-16 |
| PAM16      | 0.2777356  | 8.717E-16 |
| PCBP1-AS1  | 0.2257565  | 8.931E-16 |
| CARD19     | -0.3983021 | 9.244E-16 |
| DARS       | 0.3476683  | 9.727E-16 |
| POLR2H     | 0.2952523  | 9.767E-16 |
| PJA2       | -0.3496701 | 1.049E-15 |
| SELENOK    | -0.3573414 | 1.137E-15 |
| PSMA5      | 0.2570691  | 1.145E-15 |
| RPL39      | 0.2189678  | 1.283E-15 |
| FKBP1A     | -0.367298  | 1.295E-15 |
| PHACTR2    | 0.256041   | 1.344E-15 |
| XRCC5      | 0.3325268  | 1.423E-15 |
| AC016831.5 | -0.2921893 | 1.5E-15   |
| ACADSB     | 0.1221217  | 1.522E-15 |
| SBDS       | -0.3509921 | 1.532E-15 |
| PPP4R1     | -0.2741293 | 1.558E-15 |
| NLN        | 0.165716   | 1.76E-15  |
| ADGRE2     | -0.3755013 | 1.829E-15 |
| IMPA2      | 0.2468452  | 1.851E-15 |
| SSH2       | -0.3361132 | 1.931E-15 |
| NEK9       | 0.1909076  | 2.034E-15 |
| ABRAXAS1   | 0.2299233  | 2.058E-15 |
| CREB1      | 0.2014817  | 2.089E-15 |
| MACF1      | 0.4292064  | 2.326E-15 |
| HDDC3      | 0.1916207  | 2.357E-15 |
| PPP1R3E    | 0.1967912  | 2.477E-15 |
| ALG3       | 0.1955853  | 2.728E-15 |
| RNF149     | -0.2603774 | 2.738E-15 |

|            |            |           |
|------------|------------|-----------|
| ELN        | -0.1488573 | 2.759E-15 |
| AHSA1      | 0.323513   | 2.765E-15 |
| DNAJC3     | -0.2857325 | 2.943E-15 |
| TAF12      | 0.2379522  | 3.001E-15 |
| VPS26A     | -0.2780381 | 3.141E-15 |
| BTN3A2     | 0.1942511  | 3.316E-15 |
| TLN1       | 0.352025   | 3.414E-15 |
| IFITM2     | 0.3437555  | 3.994E-15 |
| DNAJA2     | -0.3789865 | 4.151E-15 |
| RPLP2      | 0.1804769  | 4.318E-15 |
| NMNAT3     | 0.1670555  | 4.323E-15 |
| HRAS       | -0.1865198 | 4.469E-15 |
| FZR1       | -0.2159936 | 4.587E-15 |
| MNS1       | -0.2872185 | 4.665E-15 |
| MOK        | -0.1784529 | 4.686E-15 |
| MCPH1      | 0.1687759  | 4.721E-15 |
| CRYL1      | 0.202453   | 4.724E-15 |
| NFKBIZ     | 0.2511502  | 4.757E-15 |
| SMIM26     | 0.3778711  | 5.143E-15 |
| SLC3A2     | -0.341591  | 5.212E-15 |
| CD200      | 0.2365244  | 5.266E-15 |
| FAM120A    | 0.3283532  | 5.333E-15 |
| BIN1       | -0.2526061 | 5.389E-15 |
| LNPK       | 0.1405865  | 5.744E-15 |
| SFPQ       | 0.2737002  | 5.973E-15 |
| RAB1A      | -0.3688299 | 6.016E-15 |
| EHBP1L1    | -0.3141069 | 6.092E-15 |
| CKAP2      | 0.2322898  | 6.341E-15 |
| R3HDM2     | 0.303905   | 6.711E-15 |
| CYHR1      | 0.2586492  | 7.583E-15 |
| ECHDC1     | 0.2505556  | 7.999E-15 |
| ZCCHC7     | 0.2680064  | 8.011E-15 |
| ZSWIM7     | 0.242751   | 8.03E-15  |
| CALHM6     | 0.3776572  | 8.151E-15 |
| AKIRIN1    | -0.3703536 | 8.161E-15 |
| TANK       | -0.3928088 | 8.212E-15 |
| TP53BP2    | -0.3138899 | 8.464E-15 |
| STX12      | -0.2501942 | 8.481E-15 |
| PSMB1      | -0.3184142 | 8.631E-15 |
| BMI1       | 0.2235797  | 8.719E-15 |
| SLC43A2    | -0.2891192 | 8.869E-15 |
| AC096667.1 | 0.1433596  | 9.056E-15 |
| GNPTAB     | 0.3511416  | 9.562E-15 |
| ALKBH7     | 0.3856455  | 9.625E-15 |
| CCM2       | -0.3496231 | 1.037E-14 |
| PKP4       | 0.1910447  | 1.054E-14 |
| IMPDH2     | 0.372106   | 1.104E-14 |
| LINC01578  | -0.3509923 | 1.106E-14 |
| ATG101     | -0.232349  | 1.111E-14 |
| GSN        | -0.3832144 | 1.155E-14 |



|            |            |           |
|------------|------------|-----------|
| TMBIM1     | -0.2968108 | 1.171E-14 |
| CFD        | 0.6040564  | 1.174E-14 |
| EIF3B      | 0.3082769  | 1.356E-14 |
| AC090559.1 | 0.2986701  | 1.361E-14 |
| NSF        | 0.2146259  | 1.459E-14 |
| VDAC1      | 0.3933058  | 1.522E-14 |
| ARHGAP30   | -0.2820165 | 1.598E-14 |
| TRIP11     | 0.2756799  | 1.605E-14 |
| OAZ2       | -0.3138748 | 1.73E-14  |
| PCID2      | 0.2682411  | 1.731E-14 |
| EEF1AKMT4  | 0.1184579  | 1.788E-14 |
| CTSW       | -0.3692966 | 1.856E-14 |
| BAZ2A      | -0.332454  | 2.007E-14 |
| SF3B5      | -0.3101133 | 2.061E-14 |
| FASTKD1    | 0.1751678  | 2.061E-14 |
| BAALC      | -0.3984577 | 2.084E-14 |
| S100Z      | 0.3574205  | 2.087E-14 |
| PPIF       | -0.3534691 | 2.096E-14 |
| RRP9       | 0.1659124  | 2.152E-14 |
| TMEM189    | -0.2331561 | 2.18E-14  |
| TMEM192    | 0.201696   | 2.249E-14 |
| CCNL1      | 0.3467992  | 2.344E-14 |
| AL354733.3 | 0.1163882  | 2.429E-14 |
| POGLUT1    | 0.2037607  | 2.48E-14  |
| PPP4C      | -0.2837206 | 2.651E-14 |
| TMUB1      | -0.1760518 | 2.694E-14 |
| JUNB       | -0.6546799 | 2.798E-14 |
| NUDT7      | 0.1132667  | 2.841E-14 |
| MCM3AP-AS  | 0.1534861  | 2.842E-14 |
| MRPL24     | 0.2248693  | 2.878E-14 |
| DCK        | 0.3176813  | 2.934E-14 |
| HCG11      | 0.1609751  | 2.974E-14 |
| COG3       | -0.2831482 | 3.102E-14 |
| UBE2A      | -0.3286445 | 3.125E-14 |
| RPS27A     | 0.1511003  | 3.132E-14 |
| KDM5B      | -0.410198  | 3.172E-14 |
| TERF2      | -0.294041  | 3.342E-14 |
| PMS1       | 0.2280098  | 3.618E-14 |
| SH3YL1     | 0.176934   | 3.694E-14 |
| AGTRAP     | 0.2097061  | 3.75E-14  |
| ZC3H8      | 0.2435108  | 3.756E-14 |
| OTUD6B-AS  | 0.3433222  | 3.929E-14 |
| GOLIM4     | 0.3228946  | 3.93E-14  |
| UBAC1      | 0.2250298  | 4.13E-14  |
| NME2       | 0.29367    | 4.154E-14 |
| SEC14L1    | -0.3098818 | 4.202E-14 |
| TRABD      | -0.2836819 | 4.627E-14 |
| DSTYK      | -0.2258238 | 4.647E-14 |
| RPL21      | 0.1861991  | 4.785E-14 |
| EBAG9      | 0.1998466  | 5.124E-14 |

|            |            |           |
|------------|------------|-----------|
| VPS36      | 0.3409793  | 5.153E-14 |
| FBXL3      | -0.2792826 | 5.512E-14 |
| GNAS       | -0.3089874 | 5.677E-14 |
| EEF1AKMT1  | 0.1228929  | 5.829E-14 |
| CPSF2      | 0.2507088  | 5.875E-14 |
| TNNI2      | -0.2157031 | 5.985E-14 |
| IAH1       | -0.2823091 | 5.992E-14 |
| KTN1       | 0.3234723  | 6.193E-14 |
| CDC42SE2   | -0.3453211 | 6.296E-14 |
| GCNT1      | 0.2345619  | 6.8E-14   |
| ATF4       | -0.4024623 | 6.867E-14 |
| OIP5-AS1   | 0.3367337  | 6.9E-14   |
| HIST1H2AC  | -0.4141355 | 6.959E-14 |
| GTF2H5     | 0.2425676  | 7.09E-14  |
| PCIF1      | -0.2825189 | 7.969E-14 |
| SOS1       | 0.2763129  | 8.107E-14 |
| PROC       | -0.2507142 | 8.155E-14 |
| HOPX       | 0.4139576  | 8.53E-14  |
| CREG1      | 0.3137007  | 8.58E-14  |
| ELMO1      | -0.3168123 | 8.956E-14 |
| TNK2       | -0.256205  | 9.046E-14 |
| COA3       | 0.2601112  | 9.071E-14 |
| THYN1      | 0.2564968  | 9.378E-14 |
| ILF2       | -0.3200225 | 9.69E-14  |
| MITD1      | 0.2776292  | 9.717E-14 |
| CSK        | -0.286675  | 9.72E-14  |
| TNFRSF18   | -0.3417153 | 1.09E-13  |
| OSTC       | 0.2178126  | 1.146E-13 |
| ZC3H12A    | -0.1637638 | 1.151E-13 |
| ABCC4      | 0.2573732  | 1.164E-13 |
| AL450998.2 | 0.1794446  | 1.223E-13 |
| HIKESHI    | 0.257537   | 1.247E-13 |
| RAP1A      | -0.3326649 | 1.27E-13  |
| DGKD       | -0.2513538 | 1.304E-13 |
| INPP4B     | 0.2487666  | 1.31E-13  |
| SPG11      | 0.2337157  | 1.311E-13 |
| TMEM218    | 0.2014185  | 1.332E-13 |
| C12orf45   | 0.2943909  | 1.347E-13 |
| SMIM8      | 0.18665    | 1.357E-13 |
| SREBF1     | -0.2266553 | 1.382E-13 |
| STX17      | 0.2139809  | 1.396E-13 |
| TCP11L2    | -0.3020984 | 1.396E-13 |
| POLR3H     | 0.166532   | 1.42E-13  |
| PMVK       | 0.2106124  | 1.446E-13 |
| PAFAH1B1   | -0.3127339 | 1.488E-13 |
| TBC1D5     | 0.2677823  | 1.513E-13 |
| ZSWIM6     | -0.2656472 | 1.586E-13 |
| NOC3L      | 0.258719   | 1.593E-13 |
| PSMD7      | -0.2378582 | 1.767E-13 |
| ACBD3      | -0.2956895 | 1.783E-13 |

|            |            |           |
|------------|------------|-----------|
| PSMG4      | 0.2735729  | 1.802E-13 |
| NDUFA8     | 0.2079578  | 1.817E-13 |
| AATK       | -0.1419569 | 1.865E-13 |
| SOCS2      | 0.300273   | 1.888E-13 |
| DLEU1      | 0.2597595  | 1.924E-13 |
| SERPINB1   | 0.34765    | 1.948E-13 |
| DYNC1H1    | -0.281893  | 1.961E-13 |
| RPGR       | -0.3437669 | 1.961E-13 |
| CHCHD7     | 0.2746527  | 1.963E-13 |
| TMC6       | -0.3175302 | 2.098E-13 |
| CDV3       | 0.2871176  | 2.203E-13 |
| ITGA4      | 0.4042556  | 2.215E-13 |
| ALAS1      | -0.2764578 | 2.24E-13  |
| CLK1       | -0.3830135 | 2.284E-13 |
| NDUFA3     | 0.2657368  | 2.343E-13 |
| CLPTM1L    | 0.2023603  | 2.393E-13 |
| IRF9       | -0.2311689 | 2.44E-13  |
| PAFAH1B2   | -0.3406115 | 2.484E-13 |
| NFATC2     | -0.25511   | 2.486E-13 |
| UBE3D      | 0.1268604  | 2.521E-13 |
| PGM2L1     | -0.3352276 | 2.553E-13 |
| PTBP2      | -0.2633899 | 2.566E-13 |
| NUP42      | 0.265382   | 2.696E-13 |
| TRUB2      | 0.1874819  | 2.729E-13 |
| GARS-DT    | 0.2841331  | 2.757E-13 |
| PSMG1      | 0.2138835  | 2.818E-13 |
| RNF168     | -0.3659027 | 3.085E-13 |
| ARHGEF6    | 0.2821595  | 3.213E-13 |
| SKA2       | 0.2102613  | 3.463E-13 |
| AL359504.2 | 0.1229828  | 3.497E-13 |
| SPOP       | -0.3163424 | 3.643E-13 |
| PUS7       | 0.1881535  | 3.689E-13 |
| IFNGR2     | -0.3655233 | 3.863E-13 |
| VNN1       | 0.3209641  | 4.05E-13  |
| DENND3     | -0.2907744 | 4.14E-13  |
| ABHD14A    | 0.2331259  | 4.143E-13 |
| LATS2      | -0.2490254 | 4.337E-13 |
| ZNF253     | 0.1738128  | 4.615E-13 |
| LZIC       | 0.2185456  | 4.676E-13 |
| ARV1       | 0.1311055  | 4.727E-13 |
| AGPAT2     | -0.2954245 | 4.902E-13 |
| CIITA      | 0.2592258  | 4.933E-13 |
| CACUL1     | -0.2478108 | 4.964E-13 |
| CMC1       | 0.2179648  | 5.165E-13 |
| SNCA       | 0.2581317  | 5.247E-13 |
| KLHDC8B    | 0.1303633  | 5.412E-13 |
| VEZF1      | -0.2830408 | 5.55E-13  |
| NDUFB2     | 0.2542602  | 5.662E-13 |
| MAP3K2     | -0.2818558 | 5.75E-13  |
| UBA6       | -0.2777324 | 5.972E-13 |

|            |            |           |
|------------|------------|-----------|
| AGL        | 0.1748204  | 6.134E-13 |
| ANKRD13D   | -0.2090679 | 6.438E-13 |
| PLAC8      | 0.4239892  | 6.692E-13 |
| PPP6C      | -0.2394463 | 6.746E-13 |
| SATB1-AS1  | 0.2998224  | 6.75E-13  |
| ZNF681     | 0.1569077  | 6.928E-13 |
| ARPC1A     | -0.2488457 | 6.998E-13 |
| PPP3R1     | -0.3404365 | 7.431E-13 |
| ACTR1A     | -0.266004  | 7.495E-13 |
| ZBTB46     | -0.1969409 | 7.679E-13 |
| CCL1       | -0.1909476 | 7.845E-13 |
| SLC2A1     | -0.2767395 | 7.876E-13 |
| DBP        | 0.157998   | 7.889E-13 |
| N4BP1      | -0.2992175 | 7.986E-13 |
| AL133330.1 | -0.1630457 | 8.15E-13  |
| TPR        | 0.3267108  | 8.399E-13 |
| EIF4G3     | 0.244842   | 8.439E-13 |
| WBP11      | -0.286942  | 8.772E-13 |
| XPO1       | 0.313428   | 8.834E-13 |
| MIR155HG   | 0.250986   | 8.962E-13 |
| TCAIM      | 0.1540071  | 9.303E-13 |
| STX11      | -0.2164386 | 9.333E-13 |
| GART       | 0.2554073  | 9.371E-13 |
| AP1G1      | -0.2971685 | 9.56E-13  |
| PCYOX1     | 0.1972073  | 9.718E-13 |
| EMB        | 0.3829161  | 9.99E-13  |
| ACTB       | -0.3149714 | 1.004E-12 |
| MANF       | -0.3929346 | 1.02E-12  |
| TRADD      | 0.1659403  | 1.039E-12 |
| PIGBOS1    | 0.1876362  | 1.046E-12 |
| ARHGAP4    | -0.3029963 | 1.088E-12 |
| RPL24      | 0.1855889  | 1.13E-12  |
| RNF20      | 0.1692082  | 1.148E-12 |
| RASGRP3    | 0.2672623  | 1.156E-12 |
| ADK        | 0.1990442  | 1.156E-12 |
| ADPRHL2    | -0.2304555 | 1.165E-12 |
| AKAP1      | 0.1417309  | 1.176E-12 |
| STXBP4     | 0.1132329  | 1.196E-12 |
| CLNS1A     | 0.3417519  | 1.204E-12 |
| TINF2      | -0.2283326 | 1.218E-12 |
| BANF1      | 0.2589946  | 1.292E-12 |
| SGK3       | 0.2458177  | 1.292E-12 |
| SMIM19     | 0.228699   | 1.296E-12 |
| PTPN2      | 0.2901883  | 1.311E-12 |
| THOC2      | 0.3578631  | 1.328E-12 |
| ZNF780B    | 0.1817711  | 1.342E-12 |
| IMP3       | 0.3248247  | 1.351E-12 |
| BUD31      | -0.3351422 | 1.401E-12 |
| SV2A       | 0.1424199  | 1.412E-12 |
| ZC3H15     | -0.3549967 | 1.506E-12 |

|            |            |           |
|------------|------------|-----------|
| AL499604.1 | 0.1797117  | 1.514E-12 |
| GNPDA1     | 0.1616494  | 1.515E-12 |
| ROCK2      | 0.307619   | 1.518E-12 |
| PLPPR3     | 0.2415993  | 1.623E-12 |
| GCH1       | -0.2863598 | 1.629E-12 |
| CD7        | -0.3017283 | 1.654E-12 |
| PRDX5      | -0.3241902 | 1.663E-12 |
| ZNF248     | 0.1453319  | 1.737E-12 |
| SMARCA5    | 0.3316633  | 1.818E-12 |
| CCDC34     | 0.1766435  | 1.826E-12 |
| MDK        | -0.3928551 | 1.901E-12 |
| FLYWCH2    | 0.1994653  | 1.93E-12  |
| ATP5MC1    | 0.3064293  | 1.937E-12 |
| PPIB       | -0.3359285 | 1.998E-12 |
| KRT17      | -0.4246644 | 2.009E-12 |
| LENG8      | -0.2652532 | 2.084E-12 |
| ANXA2      | -0.386653  | 2.095E-12 |
| BCL11A     | 0.4618399  | 2.099E-12 |
| NR2F6      | 0.1243398  | 2.139E-12 |
| RECQL      | 0.2272617  | 2.188E-12 |
| UBE2L3     | -0.2670409 | 2.25E-12  |
| TALDO1     | 0.2455574  | 2.271E-12 |
| AKAP8L     | -0.2913619 | 2.272E-12 |
| KHNYN      | -0.2383969 | 2.318E-12 |
| MSH2       | 0.2279008  | 2.328E-12 |
| COL4A5     | 0.1923452  | 2.366E-12 |
| MIB1       | 0.2486463  | 2.487E-12 |
| TTC37      | 0.2732986  | 2.518E-12 |
| VPS41      | 0.2422996  | 2.529E-12 |
| BCLAF1     | 0.2866394  | 2.584E-12 |
| LRRK1      | 0.191563   | 2.584E-12 |
| CSGALNAC   | -0.2933429 | 2.755E-12 |
| EAPP       | -0.2950841 | 2.766E-12 |
| XIRP2      | 0.1778389  | 2.797E-12 |
| SRP72      | 0.3096732  | 2.798E-12 |
| NDUFV3     | 0.2493167  | 2.809E-12 |
| CLDND1     | -0.2977825 | 2.864E-12 |
| NPEPPS     | -0.3829873 | 2.979E-12 |
| RABEPK     | 0.146636   | 3.023E-12 |
| GMPR2      | 0.1948788  | 3.174E-12 |
| SGO2       | 0.2049141  | 3.254E-12 |
| SH3GL1     | -0.2155841 | 3.297E-12 |
| SLITRK4    | 0.1649024  | 3.419E-12 |
| ATIC       | 0.2686235  | 3.473E-12 |
| TCEAL4     | 0.2515711  | 3.609E-12 |
| CCND3      | -0.3362803 | 3.618E-12 |
| RNF114     | -0.2824296 | 3.717E-12 |
| ANKRD28    | -0.396865  | 3.808E-12 |
| SRBD1      | 0.2284553  | 3.843E-12 |
| ALDH3A2    | 0.1068085  | 3.883E-12 |

|           |            |           |
|-----------|------------|-----------|
| RNASE3    | 0.1099587  | 4.105E-12 |
| RASSF5    | -0.2324262 | 4.302E-12 |
| ATXN7L1   | 0.1134687  | 4.358E-12 |
| S100A4    | -0.6372423 | 4.397E-12 |
| ZBTB38    | 0.1081293  | 4.512E-12 |
| ARL5A     | 0.2479442  | 4.731E-12 |
| ZEB1      | -0.3208037 | 4.795E-12 |
| R3HDM1    | 0.2111396  | 4.897E-12 |
| CKS2      | 0.2060567  | 4.961E-12 |
| PRDM16    | 0.1710744  | 5.107E-12 |
| LINC00665 | 0.2437834  | 5.115E-12 |
| PPM1K     | 0.213276   | 5.14E-12  |
| DNMT1     | 0.303548   | 5.177E-12 |
| ST6GAL1   | 0.0823115  | 5.25E-12  |
| EGLN2     | -0.2404503 | 5.557E-12 |
| FRY       | 0.1256105  | 5.809E-12 |
| NMI       | 0.3158874  | 5.929E-12 |
| ALDH3B1   | 0.2300141  | 5.966E-12 |
| POLR3GL   | 0.2806892  | 6.027E-12 |
| ORMDL2    | -0.2455119 | 6.414E-12 |
| CPTP      | -0.1602506 | 6.5E-12   |
| UTP18     | 0.264446   | 6.553E-12 |
| SMC1A     | 0.298815   | 6.976E-12 |
| NSRP1     | 0.3080173  | 7.226E-12 |
| RNF145    | -0.3105225 | 7.417E-12 |
| OCLN      | 0.2119358  | 7.78E-12  |
| RPL22L1   | 0.3776643  | 7.8E-12   |
| DYRK1B    | -0.2209072 | 7.944E-12 |
| C1GALT1C1 | 0.177827   | 8.069E-12 |
| RIDA      | 0.1434256  | 8.348E-12 |
| UBE2M     | 0.2617469  | 8.567E-12 |
| RRAGA     | -0.1940869 | 8.776E-12 |
| AHR       | -0.3868904 | 8.91E-12  |
| TCOF1     | 0.2452219  | 9.162E-12 |
| SMIM30    | 0.1781462  | 9.269E-12 |
| ABI3      | -0.1142143 | 9.451E-12 |
| HIBADH    | 0.1373331  | 9.515E-12 |
| CDK4      | 0.2936784  | 9.749E-12 |
| SLC10A3   | -0.1785023 | 9.772E-12 |
| PAICS     | 0.2746375  | 9.83E-12  |
| CPNE3     | 0.3045036  | 9.965E-12 |
| ZEB2      | 0.293197   | 1.004E-11 |
| UXS1      | 0.2194509  | 1.008E-11 |
| FBXW11    | -0.2095644 | 1.015E-11 |
| GDF11     | 0.2486823  | 1.017E-11 |
| UBR5-AS1  | 0.2609897  | 1.032E-11 |
| RNF214    | 0.1705387  | 1.057E-11 |
| UBE2Z     | -0.282711  | 1.139E-11 |
| FAM76A    | -0.2091813 | 1.192E-11 |
| DPM1      | -0.202435  | 1.224E-11 |

|            |            |           |
|------------|------------|-----------|
| PCBP2      | 0.2702832  | 1.269E-11 |
| RNMT       | -0.317321  | 1.313E-11 |
| TNFSF14    | -0.2279171 | 1.343E-11 |
| NUDT6      | 0.1355458  | 1.356E-11 |
| MAP3K4     | 0.158332   | 1.36E-11  |
| KAT6A      | -0.2998141 | 1.375E-11 |
| RHEB       | -0.3280623 | 1.386E-11 |
| SLC30A1    | -0.2348607 | 1.392E-11 |
| TARSL2     | 0.2003538  | 1.402E-11 |
| SLC43A1    | 0.1354929  | 1.421E-11 |
| HMGCS1     | -0.303874  | 1.445E-11 |
| PPWD1      | 0.1973452  | 1.516E-11 |
| NOTCH3     | -0.1522106 | 1.516E-11 |
| DNAJC19    | 0.3003146  | 1.565E-11 |
| NFKB1      | -0.3087593 | 1.586E-11 |
| RSAD1      | 0.1289753  | 1.632E-11 |
| ELF4       | -0.2188405 | 1.632E-11 |
| RYBP       | -0.3404254 | 1.646E-11 |
| ACTR1B     | -0.2778638 | 1.678E-11 |
| AC019205.1 | 0.0749992  | 1.711E-11 |
| COX4I1     | -0.271469  | 1.827E-11 |
| PBDC1      | -0.2846209 | 1.857E-11 |
| IDI1       | -0.3229219 | 1.88E-11  |
| ALDH1B1    | 0.0811845  | 1.903E-11 |
| BCKDHB     | 0.11322    | 1.904E-11 |
| CEBPB      | -0.3704952 | 1.94E-11  |
| YPEL3      | 0.3417984  | 1.94E-11  |
| MMACHC     | 0.067942   | 1.952E-11 |
| NT5C       | -0.3131261 | 2.015E-11 |
| PDCD6      | 0.2434253  | 2.114E-11 |
| NHP2       | 0.3268414  | 2.169E-11 |
| NEAT1      | -0.4831507 | 2.175E-11 |
| PNPT1      | 0.2242567  | 2.263E-11 |
| EIF3E      | 0.2842428  | 2.284E-11 |
| IL16       | 0.2197465  | 2.304E-11 |
| LRIF1      | 0.2209501  | 2.325E-11 |
| LINC00899  | 0.3046463  | 2.344E-11 |
| GOPC       | 0.2111144  | 2.433E-11 |
| NFYB       | 0.1977834  | 2.461E-11 |
| MMP19      | -0.2030603 | 2.483E-11 |
| ZNF326     | -0.2886368 | 2.493E-11 |
| ADD3       | 0.2389884  | 2.501E-11 |
| CIR1       | -0.3528789 | 2.595E-11 |
| TRIM16     | 0.2273693  | 2.619E-11 |
| DEAF1      | 0.2179028  | 2.621E-11 |
| BCOR       | -0.3286024 | 2.621E-11 |
| ACAT1      | 0.1633707  | 2.688E-11 |
| ERMP1      | 0.1960726  | 2.758E-11 |
| BDH2       | 0.1137448  | 2.785E-11 |
| ACTL6A     | 0.2304834  | 2.809E-11 |

|           |            |           |
|-----------|------------|-----------|
| PRR12     | 0.1854009  | 2.831E-11 |
| MID1IP1   | -0.2671152 | 2.873E-11 |
| ARMC10    | 0.2268743  | 2.955E-11 |
| PDXP      | 0.0997397  | 2.961E-11 |
| ZNFX1     | -0.2871689 | 3.02E-11  |
| RPUSD3    | 0.1663748  | 3.032E-11 |
| ACOT13    | 0.2488429  | 3.161E-11 |
| PCMTD2    | 0.1920188  | 3.198E-11 |
| CARNMT1   | 0.1825893  | 3.214E-11 |
| SRP14-AS1 | 0.1850806  | 3.219E-11 |
| FES       | 0.1928925  | 3.224E-11 |
| SLC16A7   | 0.240334   | 3.417E-11 |
| CLPB      | 0.1450398  | 3.467E-11 |
| SLC35E1   | -0.203197  | 3.523E-11 |
| TOR4A     | -0.1973532 | 3.621E-11 |
| MAPKBP1   | -0.2237256 | 3.782E-11 |
| RNF7      | -0.272436  | 3.795E-11 |
| BLOC1S2   | -0.2877328 | 3.86E-11  |
| STK17B    | -0.3481988 | 3.873E-11 |
| PPTC7     | -0.1948735 | 3.946E-11 |
| PRH1      | 0.1759016  | 4.035E-11 |
| RPF2      | 0.1779273  | 4.144E-11 |
| POLR2F    | 0.2896197  | 4.19E-11  |
| NBAS      | 0.1564161  | 4.247E-11 |
| S1PR2     | -0.104311  | 4.308E-11 |
| CNPY2     | 0.2758428  | 4.363E-11 |
| DUSP2     | 0.2857886  | 4.497E-11 |
| CNNM3     | 0.0932098  | 4.514E-11 |
| ARFGAP3   | -0.2311265 | 4.655E-11 |
| RNF213    | 0.24281    | 4.664E-11 |
| ENTPD1-AS | 0.1770313  | 4.851E-11 |
| SELENOT   | -0.2906887 | 4.958E-11 |
| SELENOW   | -0.2223001 | 5.005E-11 |
| SOCS3     | -0.2547573 | 5.238E-11 |
| GMPR      | 0.1807482  | 5.365E-11 |
| PPA1      | 0.2970998  | 5.731E-11 |
| NIFK      | 0.2777546  | 5.966E-11 |
| TOX4      | -0.2759947 | 6.002E-11 |
| WRNIP1    | 0.1949258  | 6.029E-11 |
| FBL       | 0.3282788  | 6.234E-11 |
| WEE1      | -0.2315745 | 6.663E-11 |
| TST       | 0.1973623  | 7.059E-11 |
| SASH3     | -0.2401188 | 7.171E-11 |
| MTR       | 0.2875989  | 7.358E-11 |
| RBM27     | -0.2466104 | 7.366E-11 |
| C20orf27  | 0.188746   | 7.553E-11 |
| ADAL      | 0.1011933  | 7.632E-11 |
| KCMF1     | -0.304577  | 7.941E-11 |
| MLEC      | 0.287683   | 8.042E-11 |
| TIMP2     | 0.2455314  | 8.104E-11 |



|           |            |           |
|-----------|------------|-----------|
| ELP4      | 0.1230552  | 8.132E-11 |
| LIMD1     | -0.158594  | 8.17E-11  |
| TNFRSF4   | -0.4375919 | 8.175E-11 |
| CD68      | -0.232077  | 8.257E-11 |
| SSR1      | 0.2525678  | 8.295E-11 |
| MED13L    | -0.3069563 | 8.38E-11  |
| CTR9      | 0.2748548  | 8.948E-11 |
| CHIC2     | -0.2944492 | 9.173E-11 |
| DUT       | 0.2803905  | 9.213E-11 |
| NUMB      | -0.2401958 | 9.315E-11 |
| HEATR5B   | -0.193025  | 9.346E-11 |
| RAB5C     | -0.2797172 | 9.611E-11 |
| SLC22A16  | 0.1498823  | 9.827E-11 |
| RNASEL    | 0.1100408  | 1.005E-10 |
| BAIAP2-DT | -0.2417821 | 1.06E-10  |
| EIF4H     | -0.3335639 | 1.068E-10 |
| ERLIN1    | 0.2489148  | 1.075E-10 |
| ZNF74     | 0.0865286  | 1.095E-10 |
| YPEL2     | -0.2872454 | 1.117E-10 |
| MRTO4     | 0.2082272  | 1.119E-10 |
| GLUD1     | -0.2742431 | 1.124E-10 |
| SORD      | 0.2125199  | 1.131E-10 |
| CPNE8     | 0.1885245  | 1.136E-10 |
| LINC00909 | 0.1978045  | 1.146E-10 |
| SOD2      | -0.4694238 | 1.167E-10 |
| MYBBP1A   | 0.1312574  | 1.183E-10 |
| SMAD5     | 0.1748929  | 1.218E-10 |
| FAM89B    | -0.2568481 | 1.235E-10 |
| CDCA7L    | 0.2409246  | 1.265E-10 |
| GCSAML    | 0.2862361  | 1.28E-10  |
| SDC4      | -0.1669029 | 1.342E-10 |
| ITPRID2   | -0.32705   | 1.37E-10  |
| SLA       | 0.1035488  | 1.377E-10 |
| ZNF32     | 0.1492986  | 1.4E-10   |
| NME4      | 0.2263399  | 1.461E-10 |
| SNHG15    | -0.2966313 | 1.472E-10 |
| CLEC2D    | 0.1527662  | 1.517E-10 |
| TOMM20    | 0.305562   | 1.547E-10 |
| OARD1     | 0.2258584  | 1.561E-10 |
| AZU1      | 0.5047002  | 1.574E-10 |
| PLAU      | -0.3421229 | 1.593E-10 |
| JCHAIN    | -0.1843023 | 1.596E-10 |
| MAPRE1    | -0.2999552 | 1.599E-10 |
| PAPOLA    | -0.2601473 | 1.602E-10 |
| MAP3K1    | -0.2810036 | 1.635E-10 |
| NT5DC1    | 0.151448   | 1.639E-10 |
| SPATC1L   | 0.1783657  | 1.655E-10 |
| TARDBP    | -0.2840871 | 1.677E-10 |
| MSH3      | 0.1825977  | 1.71E-10  |
| ATRN      | 0.1220089  | 1.738E-10 |

|            |            |           |
|------------|------------|-----------|
| TSEN2      | 0.1375026  | 1.761E-10 |
| ATP1A1-AS1 | 0.0727452  | 1.766E-10 |
| ARHGEF2    | -0.3276115 | 1.766E-10 |
| SAMD4B     | -0.2325752 | 1.799E-10 |
| AAMDC      | 0.1550183  | 1.808E-10 |
| ZNHIT6     | 0.2648778  | 1.81E-10  |
| DDX55      | 0.1850163  | 1.894E-10 |
| PPCS       | 0.2945128  | 1.926E-10 |
| TLR4       | 0.0767765  | 1.95E-10  |
| MRPL19     | 0.2322205  | 2.016E-10 |
| DNTTIP1    | -0.1893106 | 2.05E-10  |
| CHCHD3     | 0.1728735  | 2.077E-10 |
| SSU72      | 0.2524891  | 2.131E-10 |
| CCDC144A   | 0.1849575  | 2.168E-10 |
| SERTAD3    | -0.2068054 | 2.204E-10 |
| RPL41      | 0.1386464  | 2.23E-10  |
| TMED3      | 0.2257041  | 2.251E-10 |
| RPL11      | 0.140873   | 2.325E-10 |
| CENPX      | 0.224339   | 2.354E-10 |
| AC026471.1 | 0.1096809  | 2.372E-10 |
| NDC1       | 0.0886044  | 2.5E-10   |
| ZNF516     | -0.2462819 | 2.502E-10 |
| LY75       | 0.2786659  | 2.536E-10 |
| SNN        | -0.1559591 | 2.552E-10 |
| MRE11      | 0.2415068  | 2.553E-10 |
| PPP3CA     | 0.2353749  | 2.566E-10 |
| RTCA-AS1   | 0.2219861  | 2.592E-10 |
| BRCC3      | 0.1666641  | 2.639E-10 |
| SETD5      | -0.2234196 | 2.656E-10 |
| B4GALT6    | 0.1110812  | 2.668E-10 |
| FAM111A    | 0.2502656  | 2.689E-10 |
| GALK1      | 0.1483978  | 2.74E-10  |
| COPS2      | -0.2834303 | 2.904E-10 |
| TRPV2      | -0.1240817 | 3.142E-10 |
| KIF1BP     | -0.1906471 | 3.144E-10 |
| MTLN       | 0.1389662  | 3.173E-10 |
| PGRMC2     | 0.2349824  | 3.19E-10  |
| SHOC2      | -0.3487045 | 3.203E-10 |
| FAH        | 0.2172392  | 3.224E-10 |
| PVT1       | 0.1241479  | 3.281E-10 |
| PARK7      | 0.2799379  | 3.283E-10 |
| ZBTB20     | 0.2875064  | 3.288E-10 |
| CEP57      | 0.2342979  | 3.301E-10 |
| ERVK3-1    | -0.1970213 | 3.348E-10 |
| RICTOR     | -0.3245155 | 3.391E-10 |
| GSEC       | 0.1119089  | 3.403E-10 |
| PRKAA1     | -0.3308964 | 3.466E-10 |
| CLK3       | -0.2201671 | 3.513E-10 |
| INTS13     | 0.1917777  | 3.687E-10 |
| BBC3       | -0.1034751 | 3.694E-10 |

|            |            |           |
|------------|------------|-----------|
| ZMYND19    | 0.0962102  | 3.707E-10 |
| MDFI       | 0.1552521  | 3.772E-10 |
| INTS10     | 0.2356858  | 3.78E-10  |
| MRPL1      | 0.1808051  | 3.807E-10 |
| AC016831.1 | -0.1633907 | 3.841E-10 |
| GPBP1      | -0.2255809 | 3.897E-10 |
| RELA       | -0.2431445 | 4.059E-10 |
| GLIPR1     | 0.5364934  | 4.165E-10 |
| CAPRIN1    | 0.2504831  | 4.238E-10 |
| EVI2A      | 0.2813223  | 4.247E-10 |
| FADS1      | 0.2685061  | 4.34E-10  |
| SMARCAD1   | 0.189602   | 4.378E-10 |
| RIOX2      | 0.1928149  | 4.6E-10   |
| SCARB1     | 0.1484694  | 4.612E-10 |
| LINC00996  | 0.1536751  | 4.854E-10 |
| TSSC4      | -0.1460937 | 4.859E-10 |
| GABARAPL1  | -0.1954528 | 5.036E-10 |
| RFLNB      | 0.2542849  | 5.089E-10 |
| ALPK1      | 0.1456058  | 5.159E-10 |
| RAB2A      | -0.2948323 | 5.255E-10 |
| CHEK2      | 0.1099771  | 5.474E-10 |
| CRYGD      | 0.2861977  | 5.546E-10 |
| ZYX        | -0.3006459 | 5.581E-10 |
| YY1AP1     | -0.2099105 | 5.624E-10 |
| ZNF770     | 0.199794   | 5.638E-10 |
| CCDC18     | 0.1629259  | 5.801E-10 |
| TLR2       | 0.1372013  | 6.18E-10  |
| ARID1B     | 0.326376   | 6.227E-10 |
| IDE        | 0.1110905  | 6.326E-10 |
| LIMA1      | 0.1450614  | 6.333E-10 |
| PTPN22     | 0.2002002  | 6.502E-10 |
| UPF2       | 0.3516269  | 6.624E-10 |
| HIST1H2BC  | -0.336176  | 6.63E-10  |
| TIMM8B     | 0.2358166  | 6.779E-10 |
| VIM-AS1    | -0.2325129 | 6.849E-10 |
| PAF1       | -0.1970306 | 6.861E-10 |
| ZC3H6      | 0.1850654  | 7.277E-10 |
| FRA10AC1   | 0.1710584  | 7.291E-10 |
| JARID2     | -0.2494694 | 7.383E-10 |
| FOXO3      | -0.2521645 | 7.441E-10 |
| ZNF667     | -0.2738686 | 7.562E-10 |
| FAM207A    | 0.1916038  | 7.689E-10 |
| UBL5       | 0.1893652  | 7.744E-10 |
| ERCC6L2    | 0.1666927  | 7.82E-10  |
| CALCRL     | -0.2533387 | 7.913E-10 |
| RPS8       | 0.135565   | 8.31E-10  |
| DCTPP1     | 0.2332604  | 8.414E-10 |
| EMD        | -0.2406156 | 8.456E-10 |
| ORMDL1     | 0.2310661  | 8.521E-10 |
| CUL1       | 0.1478133  | 8.569E-10 |

|           |            |           |
|-----------|------------|-----------|
| RBBP6     | 0.3081329  | 8.735E-10 |
| CSPP1     | -0.2696818 | 8.955E-10 |
| EMC2      | 0.1530958  | 9.019E-10 |
| RASA2     | -0.2291337 | 9.606E-10 |
| CALHM2    | -0.1728707 | 1.043E-09 |
| SHFL      | -0.2557538 | 1.077E-09 |
| TMEM123   | 0.1970038  | 1.084E-09 |
| RTN2      | 0.1209287  | 1.088E-09 |
| RAB32     | 0.3545762  | 1.091E-09 |
| PRPSAP1   | 0.1554253  | 1.106E-09 |
| SNHG1     | 0.2131427  | 1.108E-09 |
| LAMTOR4   | 0.2299943  | 1.113E-09 |
| UNG       | 0.151321   | 1.152E-09 |
| ADGRA3    | 0.0732116  | 1.152E-09 |
| COMMD4    | 0.1812294  | 1.177E-09 |
| CEP41     | 0.1477677  | 1.18E-09  |
| Z83843.1  | 0.1835995  | 1.187E-09 |
| PHTF1     | -0.188241  | 1.192E-09 |
| MRPS24    | 0.2459588  | 1.194E-09 |
| NT5M      | 0.1670641  | 1.206E-09 |
| HIST1H1D  | 0.4642936  | 1.213E-09 |
| SERPINB6  | 0.233187   | 1.216E-09 |
| SMPD2     | -0.1719257 | 1.23E-09  |
| COPRS     | 0.192717   | 1.23E-09  |
| UQCRH     | 0.189995   | 1.234E-09 |
| TMEM258   | 0.2488568  | 1.239E-09 |
| CHST13    | 0.1009841  | 1.247E-09 |
| PML       | -0.1481122 | 1.27E-09  |
| FUCA2     | 0.1979427  | 1.285E-09 |
| CAPG      | 0.2349596  | 1.315E-09 |
| HADH      | 0.2500937  | 1.345E-09 |
| LAMTOR1   | 0.2704464  | 1.372E-09 |
| NUTF2     | -0.2086707 | 1.405E-09 |
| ENOSF1    | 0.2443439  | 1.427E-09 |
| LCOR      | -0.3060887 | 1.47E-09  |
| ZNF680    | 0.1520735  | 1.478E-09 |
| LACTB     | -0.2760441 | 1.482E-09 |
| LINC01184 | 0.1683631  | 1.487E-09 |
| CABIN1    | -0.3049724 | 1.533E-09 |
| MPLKIP    | 0.204026   | 1.538E-09 |
| TUBGCP4   | 0.1721682  | 1.589E-09 |
| RABGEF1   | -0.2273336 | 1.602E-09 |
| CTNND1    | -0.2561439 | 1.612E-09 |
| WDR89     | 0.1167752  | 1.624E-09 |
| LINC02256 | 0.2124183  | 1.658E-09 |
| IL18      | 0.3277505  | 1.706E-09 |
| SYNE3     | -0.299028  | 1.778E-09 |
| TCAF1     | 0.2232046  | 1.83E-09  |
| HILPDA    | 0.1383488  | 1.88E-09  |
| DHPS      | 0.1554193  | 1.89E-09  |

|            |            |           |
|------------|------------|-----------|
| TSPAN3     | 0.2495654  | 1.95E-09  |
| ARHGAP15   | 0.24072    | 2.019E-09 |
| ST3GAL3    | 0.1121354  | 2.042E-09 |
| B4GALT1    | -0.1966744 | 2.053E-09 |
| VEZT       | -0.2208475 | 2.068E-09 |
| ARHGEF3    | -0.1510499 | 2.071E-09 |
| ULK4       | -0.1629036 | 2.084E-09 |
| ZNF546     | 0.0815668  | 2.093E-09 |
| AC092683.1 | 0.2842811  | 2.131E-09 |
| ECI2       | 0.1586708  | 2.3E-09   |
| STARD3NL   | -0.1841149 | 2.302E-09 |
| ZNF37A     | 0.2597857  | 2.333E-09 |
| MYL12A     | -0.2450249 | 2.34E-09  |
| NFAT5      | -0.2259414 | 2.341E-09 |
| GPR35      | -0.1745197 | 2.461E-09 |
| RASSF2     | -0.2265078 | 2.498E-09 |
| NUDT16L1   | -0.3405884 | 2.524E-09 |
| TAPT1      | -0.2334733 | 2.542E-09 |
| REXO4      | 0.1803815  | 2.603E-09 |
| TRIM44     | 0.2802965  | 2.651E-09 |
| GLRX       | -0.0072122 | 2.694E-09 |
| TESK2      | 0.0614927  | 2.695E-09 |
| ATP2B4     | 0.1758338  | 2.711E-09 |
| HBD        | 0.866736   | 2.731E-09 |
| WIPI2      | -0.1841569 | 2.74E-09  |
| TRIM28     | 0.1822072  | 2.773E-09 |
| TLNRD1     | -0.1781633 | 2.784E-09 |
| MTX2       | 0.1486844  | 2.87E-09  |
| UTP14A     | 0.2165891  | 2.925E-09 |
| PNPLA8     | -0.2845245 | 2.937E-09 |
| USP28      | 0.078778   | 2.957E-09 |
| CCDC86     | 0.0711114  | 2.959E-09 |
| GCA        | 0.2257062  | 2.999E-09 |
| TOMM40     | 0.1893493  | 3.065E-09 |
| CYB5R3     | -0.2246047 | 3.148E-09 |
| CD2BP2     | -0.2025362 | 3.405E-09 |
| TMEM168    | 0.1515918  | 3.407E-09 |
| CCT3       | 0.3000935  | 3.419E-09 |
| PTBP3      | 0.2328522  | 3.605E-09 |
| HSD17B12   | 0.229657   | 3.613E-09 |
| NR6A1      | 0.1778008  | 3.648E-09 |
| CD46       | 0.219203   | 3.693E-09 |
| LINC01409  | 0.1135084  | 3.811E-09 |
| NARS2      | 0.1438797  | 3.881E-09 |
| POU2F2     | -0.2635573 | 3.882E-09 |
| CAMLG      | 0.3466064  | 4.046E-09 |
| NCK1       | -0.2104696 | 4.059E-09 |
| PRKAR1A    | -0.2415855 | 4.15E-09  |
| mars-02    | 0.1056967  | 4.15E-09  |
| SF3B3      | 0.2065909  | 4.201E-09 |

|            |            |           |
|------------|------------|-----------|
| TPCN1      | 0.0956918  | 4.222E-09 |
| PLIN3      | -0.2287982 | 4.272E-09 |
| GTF2H3     | 0.1562826  | 4.274E-09 |
| ATP5MC2    | 0.174042   | 4.275E-09 |
| NLRC3      | -0.2468527 | 4.28E-09  |
| SAR1A      | -0.2510245 | 4.29E-09  |
| SYT11      | -0.1934141 | 4.305E-09 |
| ITGA3      | -0.0910552 | 4.346E-09 |
| ATP5ME     | 0.2803275  | 4.383E-09 |
| RNASEH2C   | 0.2730843  | 4.41E-09  |
| ZNF518A    | 0.2076902  | 4.513E-09 |
| GSPT2      | 0.1502354  | 4.516E-09 |
| C22orf34   | 0.1153013  | 4.823E-09 |
| AC021097.2 | 0.0539957  | 4.825E-09 |
| RALY       | -0.2196373 | 4.87E-09  |
| LNPEP      | 0.2115877  | 4.881E-09 |
| SKI        | -0.2104098 | 4.897E-09 |
| CRTC2      | -0.1741831 | 4.98E-09  |
| GNA13      | -0.2737629 | 4.98E-09  |
| DUS1L      | 0.1992879  | 5.017E-09 |
| MINCR      | 0.116292   | 5.145E-09 |
| PLA2G12A   | 0.1364923  | 5.159E-09 |
| KLHL23     | 0.1640705  | 5.251E-09 |
| BRI3BP     | 0.2763482  | 5.328E-09 |
| AMZ1       | -0.1051997 | 5.364E-09 |
| ARL11      | 0.2323382  | 5.383E-09 |
| SMIM1      | 0.1194618  | 5.451E-09 |
| ZNF718     | 0.085694   | 5.491E-09 |
| ITGB1      | 0.1917231  | 5.494E-09 |
| TRMT13     | 0.2265017  | 5.602E-09 |
| PAAF1      | 0.1691357  | 5.627E-09 |
| AC019069.1 | 0.0971403  | 5.648E-09 |
| BICRAL     | 0.0990862  | 5.712E-09 |
| CEP170     | -0.2664124 | 5.718E-09 |
| GRPEL1     | 0.1173956  | 5.75E-09  |
| DIMT1      | 0.1765984  | 5.786E-09 |
| COG6       | 0.0866654  | 5.878E-09 |
| CAVIN1     | -0.146043  | 6.147E-09 |
| SRPRB      | 0.154252   | 6.182E-09 |
| CORO1A     | -0.3179143 | 6.322E-09 |
| CDC123     | -0.2284883 | 6.73E-09  |
| GCFC2      | 0.0973414  | 6.919E-09 |
| PMEPA1     | -0.1923737 | 6.955E-09 |
| MANEA      | 0.1362787  | 7.298E-09 |
| NCK1-DT    | 0.1414336  | 7.309E-09 |
| ICE2       | 0.1717109  | 7.461E-09 |
| AC012146.1 | 0.1389388  | 7.663E-09 |
| CCN3       | -0.2432701 | 7.806E-09 |
| TWISTNB    | 0.1242096  | 8.152E-09 |
| CAP1       | -0.2463076 | 8.161E-09 |

|            |            |           |
|------------|------------|-----------|
| GPR146     | -0.2420947 | 8.308E-09 |
| TGIF1      | -0.178862  | 8.583E-09 |
| GOLGA8R    | 0.1390722  | 8.733E-09 |
| STRBP      | 0.2038779  | 8.749E-09 |
| PIGP       | 0.2406829  | 8.991E-09 |
| RCAN1      | 0.0641145  | 9.203E-09 |
| RPS6KA5    | -0.3251834 | 9.364E-09 |
| PDCD6IP    | 0.2273438  | 9.79E-09  |
| GTF2H2C    | 0.0981308  | 9.822E-09 |
| KMT2C      | -0.1985833 | 9.878E-09 |
| DOCK2      | 0.2660972  | 9.926E-09 |
| MICOS13    | 0.2938388  | 1.002E-08 |
| C5orf63    | 0.1029998  | 1.005E-08 |
| PLGRKT     | 0.1296526  | 1.007E-08 |
| TEX30      | -0.2233732 | 1.033E-08 |
| LIMK1      | -0.1458877 | 1.054E-08 |
| FOXRED2    | 0.0755192  | 1.064E-08 |
| IFRD2      | 0.2212427  | 1.099E-08 |
| FBXL12     | -0.1646833 | 1.102E-08 |
| JOSD1      | -0.244563  | 1.118E-08 |
| RPL27A     | 0.1563176  | 1.157E-08 |
| PIP4P1     | -0.1914008 | 1.159E-08 |
| BDH1       | 0.1143922  | 1.196E-08 |
| BIN3       | -0.1854402 | 1.213E-08 |
| SAP30BP    | -0.2376706 | 1.223E-08 |
| P4HA1      | 0.1780729  | 1.238E-08 |
| SMAP2      | -0.2313492 | 1.244E-08 |
| PRPF6      | 0.2111733  | 1.253E-08 |
| AC009061.2 | 0.1046597  | 1.28E-08  |
| AL021368.2 | 0.2038654  | 1.282E-08 |
| ARRB2      | -0.1948434 | 1.286E-08 |
| ZNRF2      | 0.1077029  | 1.293E-08 |
| NDUFB6     | 0.2439011  | 1.298E-08 |
| EPHA1-AS1  | 0.1216366  | 1.308E-08 |
| RBM39      | -0.262567  | 1.338E-08 |
| FMC1       | 0.1764588  | 1.38E-08  |
| GLYR1      | 0.1728387  | 1.396E-08 |
| GAB2       | -0.1476313 | 1.405E-08 |
| DPY30      | 0.2001906  | 1.414E-08 |
| CCDC14     | 0.1798172  | 1.448E-08 |
| STARD4-AS  | 0.1420914  | 1.462E-08 |
| CYSTM1     | -0.2265782 | 1.466E-08 |
| HSF1       | -0.1347653 | 1.492E-08 |
| SPINT2     | -0.251311  | 1.521E-08 |
| TMEM41B    | -0.2152676 | 1.559E-08 |
| UBQLN1     | -0.247874  | 1.579E-08 |
| NASP       | 0.3196372  | 1.592E-08 |
| VRK2       | 0.1582828  | 1.678E-08 |
| INKA1      | -0.2275549 | 1.685E-08 |
| PPP1R35    | -0.198206  | 1.7E-08   |

|            |            |           |
|------------|------------|-----------|
| TMSB4X     | -0.2742747 | 1.804E-08 |
| FAM118A    | -0.1802294 | 1.811E-08 |
| LASP1      | -0.2288679 | 1.812E-08 |
| KCNC4      | 0.1162496  | 1.838E-08 |
| TAF9       | -0.4003154 | 1.98E-08  |
| CCDC88C    | -0.1977622 | 1.983E-08 |
| CEP78      | 0.1700593  | 2.037E-08 |
| MAN1A2     | 0.2368292  | 2.055E-08 |
| AKAP7      | 0.1668331  | 2.063E-08 |
| NSD1       | 0.1772984  | 2.072E-08 |
| NCF1       | -0.1922068 | 2.107E-08 |
| CCNI       | -0.2803041 | 2.109E-08 |
| FAM136A    | 0.2388778  | 2.125E-08 |
| AMD1       | -0.2853207 | 2.139E-08 |
| ABCG1      | -0.2135686 | 2.156E-08 |
| B4GALT5    | -0.177412  | 2.158E-08 |
| PBXIP1     | -0.2721245 | 2.159E-08 |
| EMC8       | -0.1646861 | 2.249E-08 |
| ATXN2      | -0.2998299 | 2.416E-08 |
| GEMIN5     | 0.1100123  | 2.455E-08 |
| MIR4435-2H | -0.185784  | 2.46E-08  |
| NHLRC2     | 0.2107737  | 2.48E-08  |
| RPAIN      | 0.1998366  | 2.49E-08  |
| DYNC1LI1   | -0.2393999 | 2.538E-08 |
| Z99127.4   | 0.0788668  | 2.563E-08 |
| RP2        | -0.1940359 | 2.573E-08 |
| HSPH1      | 0.2338208  | 2.578E-08 |
| HECTD1     | -0.193696  | 2.603E-08 |
| ANKRD16    | 0.1306127  | 2.618E-08 |
| CHMP1A     | -0.1834834 | 2.62E-08  |
| RREB1      | -0.2908267 | 2.622E-08 |
| LTA4H      | 0.2250516  | 2.736E-08 |
| MKKS       | 0.1610282  | 2.737E-08 |
| METTL7A    | 0.1478089  | 2.761E-08 |
| BICD1      | 0.1341261  | 2.82E-08  |
| ZFAND6     | -0.2561531 | 2.829E-08 |
| ZNF664     | 0.125878   | 2.896E-08 |
| UBAP1      | -0.1892088 | 2.926E-08 |
| GRK6       | -0.1825396 | 2.942E-08 |
| FKBP8      | -0.2504657 | 2.98E-08  |
| CNIH4      | -0.1863066 | 3.005E-08 |
| ATG4D      | -0.1363477 | 3.011E-08 |
| KIF5B      | -0.2538617 | 3.028E-08 |
| S1PR4      | -0.1627793 | 3.111E-08 |
| ARIH1      | -0.2179934 | 3.175E-08 |
| FAM162A    | 0.1870153  | 3.381E-08 |
| CYTH2      | -0.1959044 | 3.398E-08 |
| NCKAP5L    | -0.1566117 | 3.404E-08 |
| RPS16      | 0.1694958  | 3.406E-08 |
| SRRM1      | 0.2558946  | 3.415E-08 |



|           |            |           |
|-----------|------------|-----------|
| DPY19L2   | 0.1266943  | 3.458E-08 |
| COX6B1    | 0.2288207  | 3.508E-08 |
| TM9SF2    | 0.228081   | 3.519E-08 |
| EMC7      | -0.1842347 | 3.525E-08 |
| MRPS9     | 0.1777943  | 3.529E-08 |
| DTD2      | 0.119814   | 3.541E-08 |
| IFT27     | 0.1331981  | 3.561E-08 |
| HAGHL     | 0.1312699  | 3.573E-08 |
| MORF4L1   | -0.2535122 | 3.681E-08 |
| MAFG      | -0.2313616 | 3.789E-08 |
| GOLGA8N   | 0.1659469  | 3.8E-08   |
| RHBDF2    | -0.2140639 | 3.837E-08 |
| RNF138    | -0.1914161 | 3.864E-08 |
| LACTB2    | 0.1260826  | 3.896E-08 |
| RMND1     | 0.1449652  | 3.969E-08 |
| MTRNR2L12 | 0.300964   | 4.026E-08 |
| ZNF551    | 0.0541321  | 4.035E-08 |
| METRN     | 0.1295507  | 4.102E-08 |
| PKD2      | 0.1723636  | 4.201E-08 |
| PIGK      | 0.1649283  | 4.246E-08 |
| ESF1      | 0.2344146  | 4.323E-08 |
| ATP8B2    | -0.1998997 | 4.337E-08 |
| ZNF485    | 0.0636036  | 4.374E-08 |
| WDR70     | 0.2276807  | 4.417E-08 |
| STAMBP    | 0.1319628  | 4.601E-08 |
| MBD2      | 0.1865865  | 4.619E-08 |
| NFE2L1    | -0.2356711 | 4.648E-08 |
| PKN2      | -0.2175022 | 4.807E-08 |
| MXD4      | -0.2721048 | 5.015E-08 |
| CORO7     | -0.1522294 | 5.019E-08 |
| AHI1      | 0.1724688  | 5.038E-08 |
| FAF2      | -0.1571966 | 5.183E-08 |
| DYRK1A    | -0.2558048 | 5.234E-08 |
| KDM2A     | -0.2230744 | 5.239E-08 |
| NEFH      | 0.0844391  | 5.306E-08 |
| COQ5      | 0.1197222  | 5.331E-08 |
| PDCD2     | 0.2785906  | 5.334E-08 |
| SEH1L     | 0.150508   | 5.458E-08 |
| DUSP3     | 0.2161002  | 5.505E-08 |
| WDR7      | 0.0864841  | 5.549E-08 |
| CSNK2B    | -0.2481303 | 5.608E-08 |
| SHKBP1    | -0.182012  | 5.684E-08 |
| ST6GALNAC | -0.1474721 | 5.721E-08 |
| ATP5F1D   | 0.2083998  | 5.866E-08 |
| IARS      | 0.2299931  | 5.872E-08 |
| ZNF181    | 0.1162614  | 5.935E-08 |
| SPAG16    | 0.1065538  | 5.942E-08 |
| PPIP5K2   | 0.2646082  | 6.055E-08 |
| NUDCD2    | 0.2347941  | 6.057E-08 |
| BRIX1     | 0.1877754  | 6.067E-08 |

|            |            |           |
|------------|------------|-----------|
| RBX1       | 0.2196322  | 6.077E-08 |
| ACO1       | 0.1144391  | 6.104E-08 |
| DNAH14     | 0.136274   | 6.195E-08 |
| SUGT1      | 0.171471   | 6.214E-08 |
| AC015813.1 | 0.1396083  | 6.215E-08 |
| DPH7       | 0.124233   | 6.382E-08 |
| GNRH1      | -0.1065046 | 6.491E-08 |
| KPNA6      | -0.1864426 | 6.573E-08 |
| NDUFS6     | 0.2922165  | 6.675E-08 |
| ADD1       | -0.2794876 | 6.738E-08 |
| SLC17A5    | -0.2139503 | 6.776E-08 |
| DEDD       | -0.1608114 | 6.835E-08 |
| KRT18      | -0.391762  | 6.848E-08 |
| FSD1L      | -0.1843386 | 6.867E-08 |
| AC103702.1 | -0.2187072 | 7.095E-08 |
| LIME1      | -0.2009265 | 7.12E-08  |
| PSMA4      | 0.245795   | 7.396E-08 |
| NDUFV2     | -0.2415212 | 7.603E-08 |
| ISCU       | 0.3422796  | 7.614E-08 |
| RPS15A     | 0.1361959  | 7.619E-08 |
| UBASH3B    | -0.2038598 | 7.709E-08 |
| CLEC11A    | 0.2179415  | 7.836E-08 |
| DNAAF2     | 0.1843121  | 8.13E-08  |
| FAM89A     | 0.1601755  | 8.187E-08 |
| RBM26-AS1  | 0.0706168  | 8.196E-08 |
| DCAF12     | 0.1253332  | 8.288E-08 |
| SNW1       | -0.2195456 | 8.352E-08 |
| EIF2B2     | -0.2195971 | 8.371E-08 |
| DMTF1      | -0.2126481 | 8.383E-08 |
| RANBP2     | -0.2688135 | 8.445E-08 |
| FBXO11     | -0.2776679 | 8.686E-08 |
| POLR1B     | 0.1134923  | 8.754E-08 |
| AC108463.3 | 0.0694043  | 8.763E-08 |
| CDYL       | 0.1524275  | 8.951E-08 |
| PDCD4      | 0.2704302  | 9.271E-08 |
| AC147067.1 | 0.0955687  | 9.336E-08 |
| NEDD4      | 0.1135239  | 9.504E-08 |
| CNST       | -0.3310159 | 9.812E-08 |
| PHF7       | 0.1621381  | 9.948E-08 |
| TTF2       | 0.2454322  | 1E-07     |
| MED10      | -0.2119503 | 1.005E-07 |
| RPL18      | 0.1401101  | 1.009E-07 |
| PAXIP1     | 0.0536073  | 1.013E-07 |
| MAT2B      | 0.1486707  | 1.02E-07  |
| ATP6V0D1   | -0.1923859 | 1.03E-07  |
| CBLB       | -0.195452  | 1.041E-07 |
| PPP4R2     | -0.2798609 | 1.067E-07 |
| ACE        | -0.1339218 | 1.068E-07 |
| MOSMO      | 0.1176575  | 1.071E-07 |
| ZNF439     | 0.1843554  | 1.077E-07 |

|             |            |           |
|-------------|------------|-----------|
| DYNC1I2     | 0.1835727  | 1.079E-07 |
| BIRC3       | -0.2128035 | 1.082E-07 |
| PRIM1       | 0.1097752  | 1.084E-07 |
| MYO1G       | -0.2321302 | 1.093E-07 |
| MIA3        | 0.2027395  | 1.098E-07 |
| DOK1        | -0.1485003 | 1.101E-07 |
| MYO1F       | -0.2233117 | 1.114E-07 |
| LIAS        | 0.1483324  | 1.125E-07 |
| OGA         | -0.2327947 | 1.149E-07 |
| CLIC3       | -0.1391903 | 1.155E-07 |
| DTYMK       | 0.1879683  | 1.196E-07 |
| CFDP1       | 0.2647203  | 1.203E-07 |
| EMID1       | 0.1807864  | 1.224E-07 |
| RNF169      | 0.1544027  | 1.24E-07  |
| IKZF1       | -0.2554123 | 1.242E-07 |
| GCAT        | 0.1203743  | 1.27E-07  |
| USP12       | -0.2983969 | 1.275E-07 |
| AURKAIP1    | 0.2041295  | 1.292E-07 |
| TICAM1      | -0.172001  | 1.308E-07 |
| TWNK        | 0.1386008  | 1.31E-07  |
| DDX60L      | 0.142436   | 1.319E-07 |
| ACP5        | -0.1557651 | 1.36E-07  |
| PROM1       | 0.3144353  | 1.366E-07 |
| GUK1        | -0.2344412 | 1.373E-07 |
| FAM160B1    | -0.2033596 | 1.384E-07 |
| TIMM9       | 0.2628821  | 1.397E-07 |
| GRN         | 0.170667   | 1.411E-07 |
| OPTN        | -0.1231019 | 1.431E-07 |
| PHKB        | 0.1971505  | 1.439E-07 |
| WASHC3      | 0.1501669  | 1.503E-07 |
| NDUFAB1     | 0.2483484  | 1.511E-07 |
| TEDC1       | -0.1390895 | 1.515E-07 |
| ZC3H4       | 0.1429813  | 1.515E-07 |
| C21orf62-AS | 0.0938235  | 1.518E-07 |
| LINC02802   | 0.0817793  | 1.555E-07 |
| MS4A7       | -0.150476  | 1.563E-07 |
| NDST2       | -0.1857246 | 1.605E-07 |
| BAK1        | -0.1968714 | 1.613E-07 |
| AC244502.1  | 0.4256238  | 1.628E-07 |
| GTPBP10     | 0.1163126  | 1.639E-07 |
| RCN1        | 0.236028   | 1.646E-07 |
| ST3GAL6     | 0.106695   | 1.651E-07 |
| IER5        | -0.2960734 | 1.652E-07 |
| MECR        | 0.0752908  | 1.666E-07 |
| FBXO9       | 0.1604183  | 1.683E-07 |
| THUMPD1     | 0.2513563  | 1.696E-07 |
| TMUB2       | -0.1787468 | 1.708E-07 |
| CDS2        | -0.2679177 | 1.71E-07  |
| GPX4        | 0.1467868  | 1.742E-07 |
| TMEM220     | 0.2099348  | 1.754E-07 |

|            |            |           |
|------------|------------|-----------|
| MAMDC2     | -0.1098317 | 1.795E-07 |
| ADSS       | 0.1532688  | 1.811E-07 |
| IVD        | 0.2261893  | 1.827E-07 |
| NDUFAF6    | 0.1487383  | 1.829E-07 |
| GATAD1     | 0.2458795  | 1.847E-07 |
| RTF2       | -0.2428118 | 1.864E-07 |
| IFNAR2     | 0.1740028  | 1.92E-07  |
| HSPG2      | -0.1974189 | 1.92E-07  |
| SCFD2      | 0.0722131  | 1.947E-07 |
| ANKRD27    | 0.1083342  | 1.948E-07 |
| TMEM60     | 0.1539853  | 1.955E-07 |
| HRH2       | 0.1182445  | 1.955E-07 |
| CISD1      | 0.1589048  | 2.018E-07 |
| IRF2BP2    | 0.3103783  | 2.029E-07 |
| BIN2       | 0.2562982  | 2.081E-07 |
| PRMT3      | 0.1226979  | 2.101E-07 |
| HOMER3     | 0.1933325  | 2.109E-07 |
| SEC22C     | -0.1724932 | 2.11E-07  |
| AC104041.1 | 0.1364973  | 2.111E-07 |
| RALGAPA1   | -0.1897485 | 2.168E-07 |
| TMEM97     | 0.1293036  | 2.203E-07 |
| INTS8      | 0.1717681  | 2.229E-07 |
| L3HYPDH    | 0.0787884  | 2.254E-07 |
| ZNF493     | 0.2185689  | 2.298E-07 |
| CEP152     | 0.1371128  | 2.309E-07 |
| C15orf61   | 0.1444849  | 2.311E-07 |
| GINM1      | -0.2429377 | 2.474E-07 |
| OCEL1      | 0.1698709  | 2.479E-07 |
| TNIP1      | -0.2614089 | 2.5E-07   |
| PREPL      | 0.116509   | 2.507E-07 |
| IL6R       | -0.2028505 | 2.53E-07  |
| NOP58      | 0.2499435  | 2.574E-07 |
| CCDC66     | 0.2074629  | 2.6E-07   |
| AP1S1      | 0.1648947  | 2.616E-07 |
| LAP3       | 0.1804776  | 2.673E-07 |
| C19orf48   | 0.1482021  | 2.674E-07 |
| ADAT2      | 0.1255657  | 2.715E-07 |
| HDLBP      | 0.1740758  | 2.749E-07 |
| ANO6       | 0.1385622  | 2.759E-07 |
| LINC01684  | 0.2177977  | 2.826E-07 |
| ADCY7      | -0.1535477 | 2.828E-07 |
| VANGL1     | -0.2050494 | 2.864E-07 |
| ZNF638     | 0.3236087  | 2.883E-07 |
| CARD6      | 0.1416647  | 2.91E-07  |
| GPSM3      | -0.2528467 | 2.939E-07 |
| DCXR       | 0.2200965  | 2.946E-07 |
| SLC35A1    | 0.146273   | 2.947E-07 |
| TNFAIP8    | 0.2668712  | 2.994E-07 |
| ZNF573     | 0.0743116  | 3.07E-07  |
| PRPF8      | 0.2441186  | 3.127E-07 |

|            |            |           |
|------------|------------|-----------|
| MPST       | 0.195259   | 3.162E-07 |
| ZMYM1      | 0.1716228  | 3.185E-07 |
| DOK3       | 0.1634803  | 3.219E-07 |
| MAPK12     | 0.0919034  | 3.225E-07 |
| IFT74      | 0.1510561  | 3.234E-07 |
| NIBAN2     | -0.1074374 | 3.238E-07 |
| GFI1       | 0.1996427  | 3.243E-07 |
| SPPL3      | -0.2187421 | 3.25E-07  |
| EVI2B      | 0.2729593  | 3.269E-07 |
| EEF1D      | -0.1514209 | 3.325E-07 |
| RRBP1      | -0.1674084 | 3.354E-07 |
| URB1       | 0.1155693  | 3.368E-07 |
| NFXL1      | 0.1291109  | 3.432E-07 |
| AC008267.5 | 0.0792933  | 3.48E-07  |
| ACTN4      | -0.2368079 | 3.497E-07 |
| TRAP1      | 0.1207174  | 3.514E-07 |
| NRAS       | -0.268209  | 3.521E-07 |
| PDLIM7     | -0.1731414 | 3.555E-07 |
| RAB6A      | -0.2145941 | 3.599E-07 |
| ZNF117     | 0.1511384  | 3.642E-07 |
| CEP162     | 0.1389322  | 3.662E-07 |
| UQCR11     | 0.2214519  | 3.722E-07 |
| KIAA1841   | -0.1337265 | 3.756E-07 |
| IRF3       | 0.1473269  | 3.847E-07 |
| RBM25      | -0.286468  | 3.859E-07 |
| CPSF3      | 0.1213753  | 3.898E-07 |
| MCEE       | 0.1151215  | 3.906E-07 |
| ZNF708     | 0.1705028  | 4.024E-07 |
| CMIP       | 0.1404974  | 4.052E-07 |
| DTWD1      | 0.205305   | 4.053E-07 |
| TBL1XR1    | 0.1996897  | 4.078E-07 |
| PPM1A      | -0.1893595 | 4.135E-07 |
| SUMO3      | 0.1729777  | 4.136E-07 |
| CFAP20     | -0.1587135 | 4.16E-07  |
| TMX3       | 0.1682958  | 4.166E-07 |
| PHPT1      | 0.1823021  | 4.168E-07 |
| DDX23      | 0.1429193  | 4.168E-07 |
| TRAF3      | -0.2185167 | 4.174E-07 |
| KCNK17     | -0.2026877 | 4.238E-07 |
| CCDC127    | -0.1511858 | 4.242E-07 |
| HS2ST1     | 0.1448638  | 4.25E-07  |
| MMP24OS    | -0.2284574 | 4.25E-07  |
| GPR27      | 0.1553965  | 4.283E-07 |
| PHF23      | -0.2211883 | 4.309E-07 |
| PDHA1      | 0.1556034  | 4.317E-07 |
| PWWP2B     | -0.1951163 | 4.327E-07 |
| CCNY       | 0.1797933  | 4.342E-07 |
| SDSL       | 0.2312506  | 4.366E-07 |
| CCT8       | 0.1896496  | 4.372E-07 |
| AC106791.1 | 0.1072463  | 4.372E-07 |

|           |            |           |
|-----------|------------|-----------|
| STAB1     | 0.2181969  | 4.46E-07  |
| PUM3      | 0.2575601  | 4.486E-07 |
| SCAMP1-AS | 0.1463743  | 4.495E-07 |
| ZNF121    | 0.1728304  | 4.496E-07 |
| THBS1     | -0.1439694 | 4.548E-07 |
| FCHSD2    | 0.1829393  | 4.56E-07  |
| GORASP2   | -0.2014183 | 4.6E-07   |
| RPL26L1   | 0.1230374  | 4.615E-07 |
| TMEM43    | -0.2341993 | 4.662E-07 |
| WARS2-AS1 | 0.0917933  | 4.705E-07 |
| TRPC4AP   | -0.1212889 | 4.73E-07  |
| RPS25     | 0.1229786  | 4.918E-07 |
| ARF3      | -0.2318782 | 4.921E-07 |
| ATP6V0E1  | 0.2229275  | 4.985E-07 |
| CAPN2     | -0.1723729 | 5.006E-07 |
| SNHG3     | 0.2722959  | 5.019E-07 |
| AUXG01000 | 0.0831961  | 5.059E-07 |
| GON7      | 0.135256   | 5.099E-07 |
| MCFD2     | -0.2006663 | 5.139E-07 |
| NDUFAF4   | 0.1006424  | 5.26E-07  |
| WDR74     | 0.1267513  | 5.315E-07 |
| MYH9      | -0.2787688 | 5.316E-07 |
| PLXNA3    | -0.1776363 | 5.373E-07 |
| ATG7      | 0.1048899  | 5.405E-07 |
| BMF       | -0.2003569 | 5.558E-07 |
| NCBP2     | 0.2249172  | 5.562E-07 |
| STIM2     | -0.2563067 | 5.7E-07   |
| FOSB      | 0.2100205  | 5.76E-07  |
| PSMD6     | -0.24568   | 6.116E-07 |
| NEXN      | 0.1084658  | 6.124E-07 |
| LRRCC1    | 0.1730642  | 6.141E-07 |
| PPDPF     | -0.2523436 | 6.154E-07 |
| ZNF22     | 0.2291454  | 6.2E-07   |
| POLR2J3   | 0.2610958  | 6.284E-07 |
| RPL22     | 0.1189822  | 6.291E-07 |
| COX18     | 0.1303612  | 6.547E-07 |
| RANBP1    | 0.272171   | 6.742E-07 |
| TCF15     | 0.0665177  | 6.822E-07 |
| RRM1      | 0.1480215  | 7.002E-07 |
| SH2B2     | -0.1184081 | 7.057E-07 |
| SAMM50    | 0.1064973  | 7.12E-07  |
| IER2      | 0.3760004  | 7.169E-07 |
| CCDC91    | 0.1904639  | 7.177E-07 |
| CCDC125   | 0.1790755  | 7.212E-07 |
| HEBP1     | 0.198539   | 7.295E-07 |
| DGKZ      | -0.1902484 | 7.322E-07 |
| NFKBIE    | -0.1707384 | 7.397E-07 |
| ZRANB1    | -0.229776  | 7.412E-07 |
| ECHS1     | 0.2004149  | 7.453E-07 |
| IPO7      | 0.1849655  | 7.475E-07 |

|           |            |           |
|-----------|------------|-----------|
| RAB11FIP4 | -0.1204946 | 7.539E-07 |
| PABPC4    | 0.2319734  | 7.552E-07 |
| EXOC2     | 0.0574847  | 7.636E-07 |
| SPIDR     | 0.1458685  | 7.679E-07 |
| SPHK1     | -0.1290228 | 7.691E-07 |
| ASCL2     | 0.0897862  | 7.738E-07 |
| SPG21     | 0.1533271  | 7.851E-07 |
| SZRD1     | -0.2190981 | 7.913E-07 |
| PDE4DIP   | 0.1126525  | 7.921E-07 |
| RABGAP1   | 0.1825737  | 7.975E-07 |
| PRMT5     | 0.1113701  | 7.979E-07 |
| MED8      | -0.144774  | 8.131E-07 |
| AHCYL1    | 0.173282   | 8.216E-07 |
| B3GALT4   | -0.1411467 | 8.862E-07 |
| CEP57L1   | 0.1362622  | 9.023E-07 |
| BFAR      | -0.1638173 | 9.035E-07 |
| TRAF3IP1  | 0.1038408  | 9.049E-07 |
| C12orf75  | -0.1576502 | 9.061E-07 |
| LITAF     | -0.2124877 | 9.261E-07 |
| ADO       | 0.0355059  | 9.448E-07 |
| ASH2L     | 0.1123459  | 9.785E-07 |
| CDH26     | 0.091401   | 9.785E-07 |
| CENPB     | 0.112956   | 9.812E-07 |
| SPAG1     | -0.1364466 | 9.82E-07  |
| RAB7B     | 0.1339423  | 1.021E-06 |
| COA7      | 0.1122136  | 1.025E-06 |
| MAPKAP1   | 0.1606116  | 1.027E-06 |
| CCDC169   | 0.0914147  | 1.037E-06 |
| SPRY2     | 0.0659457  | 1.038E-06 |
| PFAS      | 0.0850006  | 1.045E-06 |
| C11orf24  | -0.0977209 | 1.046E-06 |
| RASGRP2   | -0.2221038 | 1.071E-06 |
| PPP3CB-AS | 0.1324567  | 1.073E-06 |
| LAT2      | 0.2230633  | 1.087E-06 |
| BZW1      | -0.2501145 | 1.091E-06 |
| OSCAR     | -0.1867389 | 1.097E-06 |
| HMG20B    | 0.074571   | 1.114E-06 |
| LPIN1     | -0.20641   | 1.141E-06 |
| SCOC-AS1  | 0.0865705  | 1.207E-06 |
| SNX18     | 0.0737617  | 1.226E-06 |
| GLOD4     | 0.2169836  | 1.228E-06 |
| CARF      | 0.106969   | 1.229E-06 |
| ZNF302    | 0.2107644  | 1.253E-06 |
| ZFP62     | 0.0903939  | 1.255E-06 |
| NUP98     | -0.2132841 | 1.257E-06 |
| TMEM131L  | -0.218613  | 1.27E-06  |
| JMJD6     | -0.2082857 | 1.275E-06 |
| RNF13     | 0.1764903  | 1.296E-06 |
| MRPL55    | 0.1917927  | 1.335E-06 |
| CCDC102B  | 0.1152084  | 1.343E-06 |

|            |            |           |
|------------|------------|-----------|
| MMRN1      | 0.2173596  | 1.349E-06 |
| TMEM234    | -0.1124745 | 1.356E-06 |
| FUT8       | 0.0794214  | 1.361E-06 |
| NT5C3B     | 0.1364811  | 1.365E-06 |
| SLC30A9    | 0.1299298  | 1.376E-06 |
| AC010642.2 | 0.1214594  | 1.377E-06 |
| ELOA-AS1   | 0.0777132  | 1.38E-06  |
| CYTH3      | -0.0851968 | 1.397E-06 |
| IFNGR1     | -0.1710864 | 1.435E-06 |
| APOL1      | 0.0836936  | 1.438E-06 |
| MRPL50     | 0.1718838  | 1.445E-06 |
| ZFR        | -0.2458672 | 1.456E-06 |
| CCT2       | 0.1787713  | 1.458E-06 |
| ARPC5      | 0.286079   | 1.459E-06 |
| ZNF727     | 0.1371533  | 1.47E-06  |
| TMBIM6     | -0.1944824 | 1.489E-06 |
| SLC35B4    | 0.11269    | 1.496E-06 |
| GADD45A    | 0.1232252  | 1.497E-06 |
| DERL1      | -0.2095081 | 1.507E-06 |
| CTSH       | 0.1022984  | 1.514E-06 |
| AL031595.3 | -0.1390583 | 1.514E-06 |
| CPSF7      | -0.1679381 | 1.534E-06 |
| MTHFD1     | 0.1518623  | 1.562E-06 |
| BAG2       | 0.1229964  | 1.563E-06 |
| LSM6       | 0.2055303  | 1.578E-06 |
| PIP4K2B    | 0.1205345  | 1.625E-06 |
| SLX4IP     | 0.1056843  | 1.627E-06 |
| LINC00205  | 0.108329   | 1.642E-06 |
| SFXN1      | 0.1087847  | 1.662E-06 |
| TMEM209    | 0.1012716  | 1.665E-06 |
| SLC39A8    | 0.1445381  | 1.67E-06  |
| COA1       | 0.1359899  | 1.673E-06 |
| ADI1       | 0.2487459  | 1.686E-06 |
| CHMP5      | 0.1766353  | 1.695E-06 |
| RABIF      | -0.2069372 | 1.733E-06 |
| ELF2       | -0.1744704 | 1.733E-06 |
| COL5A1     | 0.0759339  | 1.745E-06 |
| CCT6A      | 0.2555242  | 1.747E-06 |
| FURIN      | -0.166267  | 1.769E-06 |
| CHCHD10    | 0.2236183  | 1.772E-06 |
| RNH1       | 0.1862984  | 1.778E-06 |
| SPATA13    | -0.1837728 | 1.789E-06 |
| GAMT       | 0.1105731  | 1.802E-06 |
| ERCC5      | 0.2032401  | 1.827E-06 |
| EEF1AKNM1  | 0.130078   | 1.85E-06  |
| PLXNB2     | -0.2177494 | 1.874E-06 |
| ASRGL1     | 0.1818374  | 1.881E-06 |
| SH3TC1     | -0.1856392 | 1.936E-06 |
| SLC45A4    | -0.1231133 | 1.938E-06 |
| AK9        | 0.0921253  | 1.945E-06 |



|            |            |           |
|------------|------------|-----------|
| TACC3      | 0.2359775  | 1.953E-06 |
| TNRC6B     | 0.2466311  | 1.963E-06 |
| C21orf58   | 0.1134978  | 1.99E-06  |
| SCAND1     | -0.2864685 | 2.055E-06 |
| EHMT1      | 0.2352485  | 2.095E-06 |
| PRRC2C     | -0.2846617 | 2.113E-06 |
| DMAC2L     | 0.1429951  | 2.158E-06 |
| RALGAPA2   | 0.1281276  | 2.179E-06 |
| STAT1      | 0.2065353  | 2.18E-06  |
| SNX4       | -0.1408246 | 2.181E-06 |
| MPG        | 0.2991098  | 2.235E-06 |
| WHAMM      | -0.1739075 | 2.239E-06 |
| CUL4B      | 0.1427953  | 2.243E-06 |
| CTNS       | 0.0879929  | 2.248E-06 |
| CCDC149    | 0.1333954  | 2.288E-06 |
| PIN4       | 0.2187092  | 2.302E-06 |
| PTS        | -0.1716869 | 2.321E-06 |
| CHMP2B     | -0.199456  | 2.326E-06 |
| MCM3       | 0.1637624  | 2.366E-06 |
| SEC23IP    | 0.1430835  | 2.394E-06 |
| YAF2       | -0.1684076 | 2.405E-06 |
| TCEAL3     | -0.2241687 | 2.504E-06 |
| GLCE       | 0.0760255  | 2.508E-06 |
| GNL1       | -0.1825786 | 2.637E-06 |
| C15orf65   | -0.099417  | 2.64E-06  |
| APLP2      | 0.3046659  | 2.651E-06 |
| ATF1       | 0.1091395  | 2.654E-06 |
| TSGA10     | 0.1180868  | 2.675E-06 |
| SELENOF    | 0.179887   | 2.691E-06 |
| DTNBP1     | 0.1605602  | 2.702E-06 |
| MRPL15     | -0.1941751 | 2.716E-06 |
| IFIT1      | 0.070375   | 2.719E-06 |
| XAB2       | -0.132423  | 2.768E-06 |
| ATP2B1-AS1 | -0.3239515 | 2.776E-06 |
| TFE3       | -0.1327455 | 2.785E-06 |
| ITGA6      | 0.1510266  | 2.827E-06 |
| PNKD       | 0.218447   | 2.831E-06 |
| ZNF397     | 0.1662873  | 2.888E-06 |
| GMEB2      | -0.1167362 | 2.909E-06 |
| POLR1E     | 0.1356581  | 2.927E-06 |
| TRAK2      | 0.1564464  | 2.937E-06 |
| HMGB2      | -0.2732089 | 2.94E-06  |
| RAB22A     | -0.2356378 | 2.968E-06 |
| CCDC25     | 0.1407342  | 2.978E-06 |
| VWA8       | 0.0691843  | 2.979E-06 |
| NEK1       | 0.1006629  | 2.98E-06  |
| THOC6      | 0.1096575  | 3.012E-06 |
| RPS10      | -0.2079979 | 3.053E-06 |
| PDLIM2     | -0.1830692 | 3.057E-06 |
| PRRG4      | 0.1133069  | 3.064E-06 |

|            |            |           |
|------------|------------|-----------|
| SUCLG2     | 0.1388429  | 3.093E-06 |
| C1orf131   | 0.1633488  | 3.109E-06 |
| CCT7       | 0.239238   | 3.16E-06  |
| PGK1       | -0.1855915 | 3.171E-06 |
| EXOSC2     | 0.1159542  | 3.2E-06   |
| ALAD       | 0.0829401  | 3.269E-06 |
| ABCE1      | 0.2571374  | 3.294E-06 |
| UMODL1-AS  | 0.0860346  | 3.295E-06 |
| ATP5MPL    | 0.2444265  | 3.3E-06   |
| N4BP2L2    | 0.2366149  | 3.3E-06   |
| MRPS5      | 0.2123079  | 3.38E-06  |
| STK11      | 0.1045622  | 3.405E-06 |
| FAM50B     | 0.0996079  | 3.414E-06 |
| SCCPDH     | 0.1967778  | 3.443E-06 |
| MVP        | -0.174266  | 3.549E-06 |
| CWC25      | -0.2134015 | 3.549E-06 |
| NAT10      | 0.1780774  | 3.564E-06 |
| LMBRD2     | 0.0708609  | 3.6E-06   |
| TMEM242    | -0.1469989 | 3.61E-06  |
| AIF1       | -0.1843768 | 3.731E-06 |
| LONRF1     | -0.2019923 | 3.909E-06 |
| TSR1       | 0.1741351  | 3.925E-06 |
| PDCL3      | 0.1419643  | 3.946E-06 |
| XPO5       | 0.0902222  | 3.983E-06 |
| ALKBH2     | 0.1136367  | 3.986E-06 |
| KAT6B      | 0.1394763  | 3.994E-06 |
| CAMK1D     | -0.2097377 | 4.06E-06  |
| MAGOHB     | 0.128649   | 4.084E-06 |
| NUFIP1     | 0.0965158  | 4.108E-06 |
| STAU2      | 0.1377132  | 4.148E-06 |
| KMT2B      | 0.1152218  | 4.161E-06 |
| PRELID1    | -0.2337818 | 4.17E-06  |
| POLE       | 0.1320077  | 4.211E-06 |
| RPRD1B     | -0.1743562 | 4.231E-06 |
| MYO18A     | 0.1117023  | 4.292E-06 |
| BRI3       | 0.2191319  | 4.298E-06 |
| PTGER2     | -0.1875585 | 4.319E-06 |
| GNG10      | 0.1511792  | 4.321E-06 |
| PFDN6      | 0.1411992  | 4.323E-06 |
| PPM1H      | 0.0699612  | 4.427E-06 |
| GLTP       | -0.1527447 | 4.469E-06 |
| ADRM1      | -0.2049198 | 4.504E-06 |
| AC004687.1 | 0.3328155  | 4.508E-06 |
| HIST1H2BG  | -0.133479  | 4.673E-06 |
| HNRNPH1    | -0.1985717 | 4.749E-06 |
| DCTN4      | -0.2140442 | 4.753E-06 |
| UBXN7      | -0.2186873 | 4.79E-06  |
| PCNX4      | 0.1953444  | 4.848E-06 |
| LIG4       | 0.1321676  | 4.916E-06 |
| GPALPP1    | 0.1903678  | 4.993E-06 |

|           |            |           |
|-----------|------------|-----------|
| MFSD3     | 0.0983475  | 4.994E-06 |
| GNG7      | 0.1535578  | 5.003E-06 |
| KIAA0232  | -0.2102032 | 5.051E-06 |
| TIFA      | 0.0794561  | 5.065E-06 |
| PIK3CA    | -0.2113352 | 5.092E-06 |
| FAN1      | 0.074617   | 5.12E-06  |
| STRADB    | 0.1169805  | 5.192E-06 |
| MAGOH     | -0.1873185 | 5.23E-06  |
| ELOC      | -0.2102336 | 5.248E-06 |
| ALG6      | 0.0863648  | 5.304E-06 |
| UROS      | 0.2661621  | 5.315E-06 |
| TMEM147   | 0.1977568  | 5.389E-06 |
| NFIC      | 0.2127021  | 5.41E-06  |
| RBFA      | 0.1824728  | 5.42E-06  |
| PSIP1     | 0.2566527  | 5.429E-06 |
| POMP      | -0.2443886 | 5.476E-06 |
| GALNT7    | 0.2521388  | 5.537E-06 |
| DNAJC5    | -0.1503725 | 5.569E-06 |
| CEBPZ     | 0.2866349  | 5.586E-06 |
| METAP1D   | 0.1092951  | 5.611E-06 |
| CAMTA1    | -0.2084837 | 5.855E-06 |
| INF2      | -0.151924  | 5.859E-06 |
| SMARCC2   | 0.197982   | 5.945E-06 |
| NECTIN2   | -0.1581    | 5.961E-06 |
| GSKIP     | -0.1482234 | 6.002E-06 |
| ARHGAP32  | 0.0727915  | 6.048E-06 |
| SGPL1     | -0.1535901 | 6.071E-06 |
| CREB3     | -0.1522294 | 6.184E-06 |
| PRKCD     | -0.1772692 | 6.22E-06  |
| GAS6-AS1  | 0.1541189  | 6.229E-06 |
| KAT14     | 0.0962672  | 6.345E-06 |
| PET117    | 0.1029653  | 6.361E-06 |
| ANKRD11   | 0.0531067  | 6.382E-06 |
| SPATA5    | 0.1002014  | 6.513E-06 |
| TRAPPC4   | -0.1954911 | 6.524E-06 |
| NDUFS2    | 0.2135148  | 6.696E-06 |
| IL12A-AS1 | 0.1530537  | 6.768E-06 |
| FNDC10    | 0.0576819  | 6.837E-06 |
| LMO4      | 0.1998814  | 6.917E-06 |
| PPM1F     | -0.2204376 | 6.924E-06 |
| SCLY      | 0.0731974  | 6.969E-06 |
| TIA1      | 0.1915443  | 7.012E-06 |
| BLOC1S5   | 0.1398453  | 7.11E-06  |
| DCTN3     | -0.1862839 | 7.127E-06 |
| GEMIN6    | 0.125883   | 7.141E-06 |
| GNG5      | -0.1878487 | 7.167E-06 |
| ACSF3     | 0.1999214  | 7.26E-06  |
| STK26     | 0.205373   | 7.375E-06 |
| PHF1      | -0.1782771 | 7.556E-06 |
| ZNF322    | 0.1392258  | 7.581E-06 |

|           |            |           |
|-----------|------------|-----------|
| RPS13     | 0.1164715  | 7.599E-06 |
| DPPA4     | 0.148359   | 7.606E-06 |
| AIP       | 0.1037874  | 7.608E-06 |
| UQCRHL    | 0.0540309  | 7.702E-06 |
| NAE1      | 0.1444503  | 7.711E-06 |
| STIP1     | 0.1559442  | 7.731E-06 |
| CXCL2     | 0.0936338  | 7.772E-06 |
| ABI1      | -0.252908  | 7.962E-06 |
| ZDHHC21   | 0.1695552  | 7.971E-06 |
| PTCD2     | 0.0896565  | 8.005E-06 |
| ORC2      | 0.1321736  | 8.05E-06  |
| C19orf12  | -0.1278952 | 8.172E-06 |
| FADS3     | -0.1684835 | 8.215E-06 |
| CERT1     | -0.2524795 | 8.23E-06  |
| CAPN1     | -0.2117461 | 8.238E-06 |
| UTP20     | 0.1484771  | 8.26E-06  |
| TOP1MT    | 0.1245782  | 8.296E-06 |
| MOB2      | -0.0565428 | 8.355E-06 |
| DDX27     | 0.180723   | 8.408E-06 |
| DIPK2A    | 0.1334472  | 8.681E-06 |
| KANTR     | 0.1352464  | 8.727E-06 |
| TMEM126B  | 0.1832458  | 8.75E-06  |
| CSF2RB    | 0.2009275  | 8.803E-06 |
| NNT-AS1   | 0.1441449  | 8.827E-06 |
| MORC2     | 0.1585749  | 8.883E-06 |
| UBXN8     | 0.0667059  | 8.963E-06 |
| TAF4B     | 0.0793652  | 8.983E-06 |
| FBXO4     | 0.088449   | 8.997E-06 |
| CARD9     | 0.0964738  | 9.124E-06 |
| UBA3      | 0.1712456  | 9.257E-06 |
| AFG3L2    | 0.1561984  | 9.3E-06   |
| ANAPC11   | 0.1781636  | 9.476E-06 |
| IFT22     | -0.1669002 | 9.537E-06 |
| HCFC2     | -0.1207316 | 9.662E-06 |
| VPS53     | 0.1513919  | 9.695E-06 |
| LINC01637 | 0.1054373  | 9.862E-06 |
| PCNT      | 0.1170313  | 1.002E-05 |
| DHODH     | 0.1094256  | 1.025E-05 |
| PAXBP1    | 0.2119208  | 1.033E-05 |
| THOC3     | 0.1306109  | 1.039E-05 |
| GLT8D1    | 0.1013054  | 1.06E-05  |
| PIP4K2A   | 0.132865   | 1.063E-05 |
| LINC02245 | 0.1053434  | 1.064E-05 |
| SUN1      | -0.1641862 | 1.069E-05 |
| LAMP2     | 0.218038   | 1.074E-05 |
| SAMD1     | 0.1009354  | 1.075E-05 |
| ZMPSTE24  | 0.0977718  | 1.089E-05 |
| SLU7      | -0.2360711 | 1.101E-05 |
| TCEANC2   | 0.1157607  | 1.123E-05 |
| PRDX4     | 0.2006393  | 1.123E-05 |

|            |            |           |
|------------|------------|-----------|
| PRSS2      | -0.5946033 | 1.128E-05 |
| KIAA0100   | 0.1591863  | 1.129E-05 |
| SNRNP200   | 0.1846458  | 1.129E-05 |
| ANXA6      | -0.1754384 | 1.135E-05 |
| AL360012.1 | 0.0524843  | 1.142E-05 |
| NR1D2      | 0.095972   | 1.147E-05 |
| SLC31A2    | -0.0954254 | 1.16E-05  |
| H2AFY2     | 0.0969709  | 1.174E-05 |
| NPW        | 0.2071708  | 1.18E-05  |
| BRD8       | 0.2238634  | 1.187E-05 |
| AC016831.7 | -0.1297778 | 1.193E-05 |
| QKI        | 0.1854151  | 1.199E-05 |
| SNHG20     | 0.0973429  | 1.203E-05 |
| ALDH18A1   | 0.1021932  | 1.208E-05 |
| SELENOH    | 0.2182072  | 1.215E-05 |
| CDKL3      | 0.0600457  | 1.222E-05 |
| MYLK-AS1   | 0.0882268  | 1.246E-05 |
| ALCAM      | 0.2085197  | 1.249E-05 |
| VPS25      | 0.0862665  | 1.257E-05 |
| PXN-AS1    | 0.0733828  | 1.265E-05 |
| PEF1       | -0.198123  | 1.282E-05 |
| TTN-AS1    | 0.1254542  | 1.294E-05 |
| DCAF17     | 0.1051584  | 1.306E-05 |
| RBM22      | -0.1190041 | 1.307E-05 |
| ECM1       | -0.1436047 | 1.32E-05  |
| SLIRP      | 0.2430614  | 1.322E-05 |
| BX890604.2 | 0.2120666  | 1.34E-05  |
| VSIG10     | 0.1089629  | 1.343E-05 |
| ANAPC5     | 0.2285296  | 1.37E-05  |
| CD79B      | 0.1446143  | 1.384E-05 |
| NACC2      | -0.087902  | 1.387E-05 |
| CRYBG3     | 0.1600841  | 1.39E-05  |
| ZNF598     | -0.14074   | 1.4E-05   |
| USP22      | -0.2316276 | 1.402E-05 |
| THAP11     | -0.1192223 | 1.409E-05 |
| IL27RA     | -0.2806117 | 1.409E-05 |
| SSRP1      | 0.1877261  | 1.41E-05  |
| DEGS1      | -0.2034136 | 1.413E-05 |
| RNF25      | -0.106972  | 1.44E-05  |
| NUDT9      | 0.0949343  | 1.44E-05  |
| SLC16A1    | 0.0940336  | 1.449E-05 |
| NUP133     | 0.1066783  | 1.45E-05  |
| MTHFS      | 0.1306294  | 1.452E-05 |
| HNRNPA3    | -0.2689623 | 1.46E-05  |
| TPP1       | 0.2053468  | 1.461E-05 |
| P2RY8      | 0.1345568  | 1.485E-05 |
| PINX1      | 0.1067745  | 1.516E-05 |
| TRIM47     | -0.085008  | 1.516E-05 |
| SURF2      | 0.0576991  | 1.545E-05 |
| RNASEH1-A  | 0.0817122  | 1.548E-05 |

|            |            |           |
|------------|------------|-----------|
| PRMT7      | 0.1286899  | 1.551E-05 |
| LAMTOR2    | 0.2275106  | 1.561E-05 |
| MARC2      | 0.0847359  | 1.567E-05 |
| FECH       | 0.1242999  | 1.568E-05 |
| ST3GAL4    | 0.1609577  | 1.575E-05 |
| NSUN6      | 0.1351488  | 1.59E-05  |
| LINC00467  | 0.1151457  | 1.595E-05 |
| LINC01215  | -0.1228222 | 1.596E-05 |
| RPARP-AS1  | 0.1894783  | 1.645E-05 |
| SCHIP1     | 0.1436796  | 1.645E-05 |
| SLC25A46   | 0.1549451  | 1.658E-05 |
| FAM219B    | -0.1803705 | 1.671E-05 |
| NDUFA6     | -0.1916533 | 1.676E-05 |
| GNPDA2     | 0.0650836  | 1.683E-05 |
| MPDU1      | -0.1156609 | 1.684E-05 |
| FBXO25     | 0.1060411  | 1.696E-05 |
| SNHG30     | 0.1638461  | 1.705E-05 |
| P2RY1      | 0.0764312  | 1.705E-05 |
| SMIM10     | 0.0710522  | 1.72E-05  |
| AMPD3      | 0.0694388  | 1.726E-05 |
| GFOD2      | -0.1014101 | 1.732E-05 |
| KTN1-AS1   | 0.0512618  | 1.735E-05 |
| ATP6V1F    | 0.2628821  | 1.735E-05 |
| ASAP1      | 0.1020315  | 1.751E-05 |
| RTN3       | 0.2065009  | 1.759E-05 |
| SUSD3      | 0.0856607  | 1.768E-05 |
| NAPEPLD    | 0.113683   | 1.797E-05 |
| COX15      | 0.1144825  | 1.814E-05 |
| NDUFA2     | 0.1830166  | 1.817E-05 |
| FGD4       | 0.1180707  | 1.82E-05  |
| MIRLET7BH  | -0.1824497 | 1.829E-05 |
| MARS       | -0.1370591 | 1.831E-05 |
| MRM1       | 0.0543433  | 1.835E-05 |
| INTS6      | -0.2790823 | 1.851E-05 |
| ITFG1      | 0.0649384  | 1.872E-05 |
| PLXNC1     | 0.1193274  | 1.95E-05  |
| OSGEPL1    | 0.1055272  | 1.957E-05 |
| EHBP1      | 0.102633   | 1.968E-05 |
| MCRIP1     | -0.1790221 | 1.969E-05 |
| MRPL12     | 0.2207391  | 1.971E-05 |
| RNF44      | 0.1065772  | 1.972E-05 |
| MEGF8      | 0.0638439  | 1.986E-05 |
| COG2       | 0.126401   | 1.993E-05 |
| WHRN       | -0.081528  | 2.009E-05 |
| SNRNP25    | 0.1566281  | 2.013E-05 |
| COX5A      | 0.1280813  | 2.015E-05 |
| GALM       | 0.0420181  | 2.076E-05 |
| AC093157.1 | 0.0901915  | 2.082E-05 |
| POLR2B     | -0.0912014 | 2.11E-05  |
| C12orf29   | 0.1020083  | 2.117E-05 |

|          |            |           |
|----------|------------|-----------|
| C7orf50  | 0.11986    | 2.136E-05 |
| BICD2    | -0.1988133 | 2.14E-05  |
| MT1X     | 0.0773512  | 2.154E-05 |
| NPRL2    | 0.1331174  | 2.163E-05 |
| STUB1    | 0.137001   | 2.165E-05 |
| NRBP1    | -0.2028807 | 2.171E-05 |
| KDM6A    | -0.1750541 | 2.185E-05 |
| HENMT1   | 0.1107377  | 2.196E-05 |
| ATP6V0A2 | 0.1725303  | 2.196E-05 |
| SLC46A3  | 0.117618   | 2.203E-05 |
| CBL      | -0.2073511 | 2.23E-05  |
| SMIM20   | 0.1659876  | 2.236E-05 |
| RUNX2    | 0.1641117  | 2.236E-05 |
| RSRC1    | 0.2139695  | 2.252E-05 |
| XRCC4    | 0.0788203  | 2.273E-05 |
| PTMA     | 0.1428018  | 2.277E-05 |
| PPP2R2A  | -0.2023528 | 2.285E-05 |
| HYAL3    | 0.0806917  | 2.292E-05 |
| EIF4EBP3 | 0.215049   | 2.314E-05 |
| ATP10D   | 0.1089661  | 2.316E-05 |
| UBIAD1   | 0.0851845  | 2.319E-05 |
| SCRN3    | 0.0801386  | 2.323E-05 |
| SLC27A5  | 0.129856   | 2.34E-05  |
| SELPLG   | 0.1339853  | 2.34E-05  |
| G6PD     | -0.2036829 | 2.357E-05 |
| SRSF1    | 0.2866816  | 2.357E-05 |
| LARP4    | 0.1266373  | 2.387E-05 |
| LCP2     | 0.1052543  | 2.389E-05 |
| DEPDC1B  | 0.0811089  | 2.398E-05 |
| EIF2AK1  | 0.2701757  | 2.403E-05 |
| COPA     | -0.1583778 | 2.423E-05 |
| RAF1     | -0.1406154 | 2.425E-05 |
| GLI4     | 0.1167042  | 2.427E-05 |
| RNF187   | 0.1456649  | 2.442E-05 |
| DLGAP4   | -0.1815085 | 2.458E-05 |
| EIF4EBP1 | 0.2043599  | 2.537E-05 |
| DCPS     | 0.1483685  | 2.544E-05 |
| ACADVL   | -0.1866027 | 2.57E-05  |
| CTPS1    | 0.1595447  | 2.622E-05 |
| NDUFB5   | 0.2195154  | 2.632E-05 |
| UBALD2   | -0.1501224 | 2.635E-05 |
| PRKCQ    | 0.1071594  | 2.663E-05 |
| DNAJC10  | 0.2102626  | 2.696E-05 |
| ARFGAP2  | -0.1778674 | 2.699E-05 |
| RPL26    | 0.1441725  | 2.707E-05 |
| PBX3     | -0.2595178 | 2.707E-05 |
| NARF     | -0.1814211 | 2.714E-05 |
| MRPL39   | -0.1208845 | 2.779E-05 |
| PRDM8    | -0.144619  | 2.837E-05 |
| PHF6     | 0.1807576  | 2.85E-05  |

|            |            |           |
|------------|------------|-----------|
| ADARB1     | 0.0749979  | 2.854E-05 |
| WDR46      | 0.1508818  | 2.897E-05 |
| TFEB       | -0.1528887 | 2.933E-05 |
| KBTBD2     | -0.1906094 | 2.943E-05 |
| SLX4       | -0.0865257 | 2.945E-05 |
| ASPSCR1    | 0.1203025  | 2.946E-05 |
| DHRS4      | 0.1118773  | 3.003E-05 |
| CD52       | -0.2448131 | 3.01E-05  |
| ZNF106     | 0.1975109  | 3.024E-05 |
| DMTN       | -0.085421  | 3.071E-05 |
| AC105285.1 | 0.1358587  | 3.097E-05 |
| SCAMP1     | 0.1320701  | 3.127E-05 |
| CISD3      | 0.1670669  | 3.19E-05  |
| HELLPAR    | 0.1486954  | 3.213E-05 |
| SYNE1      | 0.1034278  | 3.218E-05 |
| RXFP1      | 0.1042708  | 3.254E-05 |
| TYW1       | 0.0783256  | 3.27E-05  |
| SS18L2     | 0.0929666  | 3.319E-05 |
| CCDC61     | 0.0559383  | 3.353E-05 |
| APH1A      | -0.1386392 | 3.427E-05 |
| LINC02693  | 0.056634   | 3.486E-05 |
| SIN3A      | -0.1836329 | 3.508E-05 |
| DERA       | 0.1118253  | 3.519E-05 |
| CISH       | 0.1311302  | 3.538E-05 |
| MRPS15     | 0.1565357  | 3.544E-05 |
| AL356804.1 | 0.1053854  | 3.578E-05 |
| NCBP2AS2   | 0.1473792  | 3.586E-05 |
| MBLAC2     | 0.1036151  | 3.588E-05 |
| CYBRD1     | 0.1740836  | 3.59E-05  |
| NINJ2      | 0.0933546  | 3.631E-05 |
| KIFC3      | -0.1457341 | 3.664E-05 |
| GID4       | 0.0913246  | 3.706E-05 |
| DPH5       | 0.09931    | 3.706E-05 |
| ISG20      | -0.1274799 | 3.738E-05 |
| C5orf24    | 0.1934922  | 3.74E-05  |
| PYCR2      | 0.1860636  | 3.817E-05 |
| PECAM1     | 0.2612844  | 3.818E-05 |
| RASA4      | 0.1020224  | 3.825E-05 |
| TTLL1      | 0.0799127  | 3.834E-05 |
| SYTL1      | -0.1657564 | 3.88E-05  |
| C17orf49   | -0.2287291 | 3.882E-05 |
| BCL7A      | 0.1434104  | 3.897E-05 |
| CD2AP      | -0.2564925 | 3.899E-05 |
| ZNF431     | 0.2351568  | 3.957E-05 |
| SYVN1      | -0.1722696 | 3.986E-05 |
| ZNF609     | 0.1364281  | 4.014E-05 |
| DGLUCY     | 0.2071543  | 4.058E-05 |
| ZBTB34     | -0.1079816 | 4.101E-05 |
| PELP1      | 0.1022925  | 4.138E-05 |
| SNHG4      | 0.1878673  | 4.154E-05 |



|            |            |           |
|------------|------------|-----------|
| FAM114A2   | 0.1416943  | 4.164E-05 |
| ZNF395     | -0.2133084 | 4.18E-05  |
| WDR13      | -0.2026031 | 4.203E-05 |
| ELP1       | 0.0755014  | 4.233E-05 |
| FARSA      | 0.2174412  | 4.268E-05 |
| ATR        | 0.1701247  | 4.297E-05 |
| RPP40      | 0.1152524  | 4.407E-05 |
| LINC00910  | 0.0418104  | 4.431E-05 |
| MRPS25     | 0.162172   | 4.434E-05 |
| KIF20B     | 0.2636864  | 4.473E-05 |
| RAB38      | 0.1227519  | 4.484E-05 |
| ZNF83      | 0.1460074  | 4.501E-05 |
| SCP2       | 0.2378827  | 4.52E-05  |
| SERPINB9   | -0.195691  | 4.528E-05 |
| KAT5       | -0.1421287 | 4.528E-05 |
| PIBF1      | 0.1602887  | 4.632E-05 |
| RCCD1      | 0.0960608  | 4.64E-05  |
| SH3D21     | 0.1623012  | 4.656E-05 |
| TRIM22     | 0.1814293  | 4.713E-05 |
| CEP44      | 0.108729   | 4.723E-05 |
| AC026124.1 | 0.1219187  | 4.729E-05 |
| PPIL3      | 0.0889984  | 4.738E-05 |
| PUM1       | -0.2130883 | 4.743E-05 |
| SLC35B3    | 0.0772051  | 4.756E-05 |
| MRPS28     | 0.1415478  | 4.759E-05 |
| LLPH       | 0.1494226  | 4.857E-05 |
| SEC63      | 0.1709874  | 4.861E-05 |
| GARS       | -0.2188078 | 4.868E-05 |
| KLHL26     | -0.0782925 | 4.917E-05 |
| TMEM14A    | 0.0895327  | 4.939E-05 |
| SRPK2      | 0.0823721  | 4.973E-05 |
| TTC14      | 0.2440985  | 4.979E-05 |
| BSG        | -0.2208113 | 4.987E-05 |
| PTGES3     | 0.2185274  | 4.991E-05 |
| TLR6       | 0.0795602  | 5.054E-05 |
| C11orf1    | 0.1124768  | 5.146E-05 |
| MED15      | -0.1519922 | 5.165E-05 |
| FAM13A     | 0.061687   | 5.183E-05 |
| ATP5MF     | 0.20224    | 5.183E-05 |
| DCAF15     | -0.1514451 | 5.209E-05 |
| AC246817.1 | 0.086648   | 5.254E-05 |
| CDKN1B     | 0.0834056  | 5.286E-05 |
| HAUS2      | -0.1906099 | 5.294E-05 |
| LRP10      | -0.1291609 | 5.343E-05 |
| TCEAL1     | 0.1168852  | 5.347E-05 |
| IL4R       | -0.1549948 | 5.358E-05 |
| RYK        | 0.1377585  | 5.404E-05 |
| GPCPD1     | -0.2032496 | 5.417E-05 |
| MYO9A      | 0.1366746  | 5.467E-05 |
| ZNF593     | 0.1734978  | 5.498E-05 |

|            |            |           |
|------------|------------|-----------|
| AFTPH      | -0.2270377 | 5.53E-05  |
| MRTFA      | -0.1952471 | 5.531E-05 |
| VWA5A      | 0.0765377  | 5.611E-05 |
| USP9X      | -0.1986144 | 5.66E-05  |
| MAGT1      | -0.1571922 | 5.729E-05 |
| MECP2      | -0.0999913 | 5.753E-05 |
| RPS15      | 0.0992847  | 5.77E-05  |
| PDAP1      | 0.1726754  | 5.781E-05 |
| MAGEF1     | 0.0998922  | 5.801E-05 |
| CD48       | -0.064962  | 5.807E-05 |
| CASP7      | -0.1291924 | 5.853E-05 |
| TPST2      | -0.1200958 | 5.92E-05  |
| GSE1       | -0.2162452 | 5.955E-05 |
| MTRNR2L8   | 0.1725768  | 6.134E-05 |
| EDEM2      | 0.1118505  | 6.192E-05 |
| SIRPA      | 0.0772266  | 6.213E-05 |
| NUDT4      | 0.0791756  | 6.239E-05 |
| LSM1       | -0.1147502 | 6.297E-05 |
| ATE1       | 0.1230081  | 6.348E-05 |
| PPP5C      | 0.0643062  | 6.476E-05 |
| B2M        | -0.1345601 | 6.493E-05 |
| DUSP1      | 0.305694   | 6.512E-05 |
| AC097448.1 | 0.0695795  | 6.513E-05 |
| NR1D1      | 0.0487706  | 6.531E-05 |
| CCDC173    | -0.108294  | 6.584E-05 |
| UBE2G1     | -0.1106565 | 6.734E-05 |
| ATG4C      | 0.1511469  | 6.827E-05 |
| GNL3L      | 0.1715472  | 6.828E-05 |
| GAR1       | 0.1552459  | 6.836E-05 |
| ACTR6      | 0.1340396  | 6.852E-05 |
| SPRED2     | -0.1312713 | 7.023E-05 |
| TAS2R14    | 0.0625284  | 7.162E-05 |
| TTN        | 0.0631676  | 7.227E-05 |
| OAT        | 0.1316836  | 7.275E-05 |
| SLC5A6     | 0.0610032  | 7.376E-05 |
| COX6A1     | -0.2006584 | 7.415E-05 |
| CASP6      | 0.175839   | 7.431E-05 |
| SLC29A1    | 0.0770909  | 7.457E-05 |
| CALR       | -0.3155192 | 7.583E-05 |
| HSH2D      | 0.1758209  | 7.586E-05 |
| RNF34      | -0.1712772 | 7.591E-05 |
| XRRA1      | 0.0674267  | 7.625E-05 |
| ELANE      | 0.3237106  | 7.63E-05  |
| EIF1B-AS1  | 0.1024755  | 7.708E-05 |
| RSAD2      | 0.0924536  | 7.737E-05 |
| PRNP       | -0.1792114 | 7.93E-05  |
| AP3S1      | -0.1702719 | 7.953E-05 |
| WBP1L      | -0.1850811 | 7.961E-05 |
| CEP250     | 0.0703003  | 7.993E-05 |
| CD3EAP     | 0.0940384  | 8.004E-05 |

|            |            |           |
|------------|------------|-----------|
| SMURF2     | -0.1529025 | 8.014E-05 |
| ZNF594     | 0.0773095  | 8.037E-05 |
| LSM5       | 0.1709707  | 8.087E-05 |
| CNTLN      | 0.1560479  | 8.101E-05 |
| TBC1D13    | 0.1164211  | 8.114E-05 |
| MRPL49     | -0.1191262 | 8.171E-05 |
| ATP6V1D    | -0.1613833 | 8.181E-05 |
| USP15      | -0.2630632 | 8.302E-05 |
| HLA-C      | -0.2313106 | 8.322E-05 |
| RNF181     | -0.2043039 | 8.355E-05 |
| TMEM80     | 0.1486573  | 8.368E-05 |
| CDK19      | 0.1035378  | 8.432E-05 |
| CHKA       | 0.0667792  | 8.467E-05 |
| HUWE1      | 0.2354322  | 8.499E-05 |
| RAD17      | 0.1080389  | 8.691E-05 |
| TXK        | 0.1036747  | 8.843E-05 |
| STK19      | -0.1185817 | 8.856E-05 |
| CACYBP     | 0.1418154  | 8.886E-05 |
| TTC19      | 0.211984   | 9.123E-05 |
| AC060780.1 | 0.189324   | 9.127E-05 |
| PGBD4      | 0.0941804  | 9.194E-05 |
| FAM160B2   | -0.1119646 | 9.244E-05 |
| DNAJC12    | 0.1166822  | 9.275E-05 |
| CHPF2      | -0.1231308 | 9.307E-05 |
| UBE2F      | 0.1261662  | 9.36E-05  |
| WAC-AS1    | 0.1651416  | 9.388E-05 |
| DUBR       | -0.109708  | 9.393E-05 |
| PSMD11     | -0.205154  | 9.418E-05 |
| KCNQ5      | 0.1036377  | 9.492E-05 |
| TCTN3      | 0.1394535  | 9.534E-05 |
| CCNC       | -0.1353492 | 9.671E-05 |
| MLX        | -0.102316  | 9.715E-05 |
| DHX37      | 0.1140915  | 9.729E-05 |
| PAXIP1-AS2 | 0.1134081  | 9.808E-05 |
| PRR11      | 0.1086893  | 9.824E-05 |
| FKBP3      | 0.1437151  | 9.875E-05 |
| MACROD1    | 0.0916666  | 9.936E-05 |
| CST3       | 0.410493   | 9.994E-05 |
| AL157895.1 | 0.2291599  | 0.0001015 |
| MTRES1     | 0.1048796  | 0.0001017 |
| ZNF358     | 0.1143405  | 0.000104  |
| SP110      | 0.2054365  | 0.0001041 |
| MXI1       | 0.1655775  | 0.0001042 |
| C20orf197  | 0.1014669  | 0.0001054 |
| FBXO7      | -0.2144561 | 0.0001055 |
| GPN3       | 0.1763366  | 0.0001073 |
| WDR36      | 0.1496938  | 0.0001096 |
| TMA7       | 0.1482992  | 0.0001111 |
| POU2F1     | -0.131459  | 0.0001124 |
| BRD3       | 0.1041846  | 0.0001137 |

|            |            |           |
|------------|------------|-----------|
| LRP5       | 0.0734625  | 0.0001139 |
| CUTA       | 0.2230515  | 0.0001144 |
| HNRNPM     | 0.2071203  | 0.0001155 |
| ERI2       | 0.0921693  | 0.0001173 |
| RBM42      | -0.1644737 | 0.0001175 |
| CXorf21    | 0.1894291  | 0.0001186 |
| H2AFZ      | 0.151991   | 0.0001199 |
| SH3BP1     | -0.174485  | 0.0001205 |
| MCCC1      | 0.0718199  | 0.0001207 |
| GABARAPL2  | 0.1347042  | 0.0001225 |
| FBR5       | -0.1857768 | 0.0001225 |
| SENP6      | 0.2311254  | 0.000123  |
| USP3       | -0.1489547 | 0.0001235 |
| TP53TG1    | 0.1307051  | 0.0001242 |
| MRPL47     | -0.1886233 | 0.0001253 |
| DNAJC21    | 0.2119348  | 0.0001259 |
| AL357079.1 | 0.0781621  | 0.0001266 |
| PLEKHM3    | 0.071663   | 0.0001278 |
| MCTS1      | 0.1980542  | 0.0001278 |
| EIF2B3     | 0.103581   | 0.0001285 |
| UPF3A      | 0.1836518  | 0.0001286 |
| PRDX1      | 0.2340578  | 0.0001288 |
| RPSA       | -0.1805505 | 0.0001296 |
| HEBP2      | -0.1747539 | 0.0001298 |
| CARS       | -0.1628182 | 0.0001306 |
| TIMM23B    | -0.0847023 | 0.000131  |
| PTX3       | -0.19106   | 0.000132  |
| KLHL18     | -0.1808725 | 0.0001329 |
| NANOS3     | -0.0716311 | 0.0001333 |
| ZNF518B    | 0.0688258  | 0.0001335 |
| NIF3L1     | 0.0752319  | 0.0001338 |
| METTL26    | 0.2212076  | 0.0001343 |
| RIC8B      | 0.0580747  | 0.0001344 |
| ZNF844     | 0.0590724  | 0.0001346 |
| YWHAB      | 0.1973946  | 0.0001348 |
| DPYD       | 0.1581503  | 0.0001348 |
| CTSA       | 0.2284728  | 0.0001356 |
| DPH6       | 0.0888503  | 0.0001361 |
| HDAC2      | 0.1946758  | 0.0001377 |
| ARHGAP9    | -0.1327515 | 0.000138  |
| MATK       | 0.1731024  | 0.0001381 |
| RPL17      | 0.1200721  | 0.0001386 |
| NBPF19     | 0.082191   | 0.0001387 |
| ALG2       | -0.1557004 | 0.0001387 |
| BLOC1S4    | 0.0408846  | 0.0001391 |
| RAB35      | -0.1483961 | 0.0001402 |
| EBLN3P     | 0.1348911  | 0.0001404 |
| VEGFA      | -0.11957   | 0.0001408 |
| RPP25L     | 0.1791573  | 0.0001429 |
| NUP54      | -0.1079894 | 0.000143  |

|            |            |           |
|------------|------------|-----------|
| ZNF414     | -0.1351441 | 0.0001436 |
| AKAP9      | 0.2980566  | 0.0001442 |
| POLI       | 0.0856873  | 0.0001444 |
| SEC24B     | -0.1518942 | 0.0001445 |
| DDX3X      | 0.2589375  | 0.0001446 |
| UPF3B      | 0.1306563  | 0.0001449 |
| AHDC1      | -0.262073  | 0.0001461 |
| IGFBP6     | -0.0888179 | 0.000147  |
| CCDC88B    | -0.188259  | 0.0001473 |
| RHOBTB3    | 0.1362152  | 0.0001487 |
| LSM4       | 0.1976645  | 0.0001513 |
| MPHOSPH9   | 0.1871589  | 0.0001521 |
| TRERF1     | 0.0699235  | 0.0001531 |
| ILF3-DT    | 0.2082375  | 0.0001531 |
| NT5C3A     | -0.1904961 | 0.000154  |
| CCDC121    | 0.0684486  | 0.0001543 |
| TMEM160    | 0.1869443  | 0.0001546 |
| TM4SF1     | -0.19385   | 0.0001554 |
| THAP2      | 0.0942978  | 0.0001556 |
| PGM2       | 0.1769141  | 0.0001561 |
| RESF1      | 0.1605392  | 0.0001584 |
| TAGLN      | 0.0767441  | 0.0001595 |
| MRPS30     | 0.1807434  | 0.0001604 |
| CA2        | 0.151023   | 0.0001614 |
| PRPF4B     | -0.2918473 | 0.0001618 |
| RNF144B    | 0.0650521  | 0.0001641 |
| RHBDD2     | -0.1589377 | 0.0001643 |
| PXN        | -0.153908  | 0.0001648 |
| ADAMTS6    | 0.0765297  | 0.0001657 |
| STX18-AS1  | 0.0701684  | 0.0001701 |
| SSBP4      | -0.1549938 | 0.0001724 |
| AC025040.1 | 0.0619201  | 0.0001746 |
| NKAP       | 0.1224498  | 0.0001802 |
| FAM228B    | 0.1410344  | 0.000182  |
| QDPR       | 0.1606987  | 0.0001826 |
| ZNF385A    | -0.1664755 | 0.0001826 |
| THAP5      | 0.129723   | 0.0001849 |
| FAM47E     | 0.0551974  | 0.000185  |
| DTX3L      | 0.1389026  | 0.0001856 |
| LENG8-AS1  | 0.1262676  | 0.0001858 |
| ZNF383     | 0.0776451  | 0.0001859 |
| KCTD5      | -0.0967504 | 0.0001861 |
| SETD2      | -0.2414466 | 0.0001861 |
| SPECC1     | 0.1840034  | 0.0001867 |
| DPF2       | -0.0974929 | 0.000188  |
| MARCKS     | -0.1864496 | 0.000188  |
| ARSD       | 0.1247427  | 0.0001883 |
| TFAM       | -0.2359549 | 0.0001897 |
| RHOT1      | 0.1495399  | 0.0001897 |
| HDHD5      | 0.0840648  | 0.0001935 |

|            |            |           |
|------------|------------|-----------|
| NUP153     | -0.1383455 | 0.0001942 |
| DIAPH2     | 0.1743131  | 0.0001951 |
| AC004540.1 | 0.0934155  | 0.0001952 |
| ATP1B3     | 0.2054723  | 0.0001954 |
| HELB       | 0.1285238  | 0.0001961 |
| CYP4V2     | 0.0890753  | 0.0001962 |
| LINC00339  | 0.1011091  | 0.0001971 |
| NMRAL1     | 0.1414916  | 0.0001985 |
| SKIDA1     | 0.1622846  | 0.0002003 |
| RRS1       | 0.1855408  | 0.0002025 |
| AGPS       | 0.1051372  | 0.000203  |
| CKLF       | -0.3594581 | 0.0002034 |
| PIGS       | 0.1172014  | 0.0002044 |
| UBE2T      | 0.072036   | 0.000206  |
| SLC39A11   | 0.0863631  | 0.0002107 |
| SWI5       | 0.1334922  | 0.0002107 |
| SSB        | 0.2730724  | 0.0002111 |
| EEF1E1     | 0.1956255  | 0.0002144 |
| PSPH       | 0.0562485  | 0.0002147 |
| MKLN1      | -0.1842244 | 0.0002154 |
| FAM92A     | 0.1501171  | 0.0002202 |
| HSBP1L1    | 0.1291172  | 0.0002229 |
| LPXN       | -0.1707924 | 0.0002249 |
| POLR3D     | 0.1669411  | 0.0002254 |
| ERP44      | -0.1952545 | 0.0002261 |
| UCHL5      | 0.1904981  | 0.0002264 |
| PQBP1      | 0.1389607  | 0.0002284 |
| BRD1       | -0.1426116 | 0.0002309 |
| SRA1       | -0.1696189 | 0.0002315 |
| ZNF174     | 0.0540558  | 0.0002329 |
| NBPF14     | 0.0682437  | 0.0002351 |
| TMEM251    | 0.1139973  | 0.0002372 |
| PPARGC1B   | 0.0867763  | 0.0002405 |
| ZNF48      | -0.1560745 | 0.0002428 |
| FBH1       | 0.1141185  | 0.0002442 |
| SVOPL      | 0.0540729  | 0.0002472 |
| BMP2K      | 0.21601    | 0.0002475 |
| TUBB       | -0.3276012 | 0.0002475 |
| THEM6      | 0.0677182  | 0.0002524 |
| KDM1A      | 0.2156353  | 0.000256  |
| COQ9       | 0.098441   | 0.00026   |
| LYPLAL1    | 0.1426222  | 0.0002602 |
| DYNLL1     | 0.1853618  | 0.0002613 |
| PPM1B      | -0.2120446 | 0.0002659 |
| TCFL5      | 0.0614066  | 0.000266  |
| LINC01252  | 0.0746828  | 0.0002666 |
| TP53I11    | -0.1083907 | 0.0002677 |
| MRPS22     | -0.1685215 | 0.0002685 |
| IFIT3      | 0.0752807  | 0.0002694 |
| CD55       | -0.2426543 | 0.0002702 |

|            |            |           |
|------------|------------|-----------|
| BTBD7      | -0.2209251 | 0.0002705 |
| EXTL2      | 0.1193102  | 0.0002717 |
| TMED10     | -0.2124949 | 0.0002718 |
| MRPL10     | -0.1205086 | 0.0002735 |
| PLPBP      | 0.1530268  | 0.0002742 |
| TTC24      | 0.1149443  | 0.0002758 |
| TIMM17A    | -0.1887774 | 0.0002798 |
| PLXDC2     | 0.1303319  | 0.0002813 |
| JTB        | 0.1710412  | 0.000282  |
| SSBP3      | 0.1657059  | 0.000284  |
| STAT3      | -0.1212495 | 0.0002852 |
| LIPA       | 0.0949398  | 0.0002852 |
| CDCA7      | 0.1236286  | 0.000286  |
| EXOSC3     | -0.0220328 | 0.0002866 |
| MOSPD1     | 0.0504256  | 0.0002922 |
| SKP2       | 0.0724678  | 0.0002939 |
| PSMB2      | -0.1543116 | 0.0002939 |
| KIAA0586   | 0.1287937  | 0.0002957 |
| POLR1A     | 0.1102644  | 0.0002982 |
| RELT       | -0.2525892 | 0.0002988 |
| AL133243.3 | -0.1469604 | 0.0002998 |
| CDK16      | -0.0820401 | 0.0003009 |
| LARP1      | 0.2028199  | 0.0003022 |
| TAF1       | 0.0845741  | 0.0003036 |
| TATDN1     | 0.231831   | 0.0003037 |
| PLXND1     | 0.1774811  | 0.0003041 |
| THAP6      | 0.0981571  | 0.0003043 |
| DCTN2      | -0.1573012 | 0.0003053 |
| SNUPN      | 0.1393909  | 0.0003093 |
| NPM3       | 0.1282924  | 0.0003104 |
| UGP2       | 0.2778514  | 0.0003114 |
| NUP50      | -0.0553907 | 0.0003117 |
| TMEM41A    | 0.1137438  | 0.0003168 |
| MGLL       | -0.023256  | 0.0003182 |
| C1orf162   | 0.1446622  | 0.0003213 |
| LDAH       | 0.0950068  | 0.0003226 |
| SHMT1      | 0.0713147  | 0.0003246 |
| ZNF574     | -0.0835538 | 0.0003277 |
| MAPRE2     | -0.2463721 | 0.0003292 |
| SHANK3     | -0.0548509 | 0.0003302 |
| DIPK1B     | 0.1074001  | 0.0003309 |
| NIPBL-DT   | 0.1676969  | 0.0003325 |
| RPA2       | 0.1347229  | 0.0003357 |
| DST        | 0.1088062  | 0.0003374 |
| GTPBP4     | -0.1823688 | 0.0003379 |
| CHMP4A     | 0.1491263  | 0.0003385 |
| SEC62      | -0.1872898 | 0.0003426 |
| CLTB       | -0.0772347 | 0.0003426 |
| LTC4S      | 0.1933781  | 0.0003434 |
| IGFBP7     | 0.2414053  | 0.0003436 |

|            |            |           |
|------------|------------|-----------|
| MAPK8IP3   | -0.079204  | 0.0003506 |
| TM9SF4     | 0.0929172  | 0.0003511 |
| CD79A      | -0.1176638 | 0.0003557 |
| DHTKD1     | 0.1774071  | 0.000356  |
| ARL8B      | -0.1741739 | 0.0003567 |
| CCDC57     | 0.1160509  | 0.0003605 |
| ENOX2      | 0.0874907  | 0.0003629 |
| OAF        | -0.0786617 | 0.0003716 |
| EIF2AK2    | 0.1810755  | 0.0003743 |
| AC090825.1 | 0.0620939  | 0.0003746 |
| CRLS1      | 0.1048097  | 0.0003796 |
| EIF4E      | -0.1587467 | 0.0003801 |
| TSC22D4    | 0.176696   | 0.0003867 |
| MESD       | 0.1980266  | 0.0003886 |
| ZDHHC7     | -0.1280564 | 0.0003908 |
| ASPH       | 0.1702596  | 0.0003946 |
| PTRH2      | 0.1456272  | 0.0003947 |
| XPNPEP1    | -0.1224585 | 0.0003971 |
| CYB561D2   | 0.1459806  | 0.0003972 |
| BCAP29     | 0.0339912  | 0.0003988 |
| MAP2K4     | -0.1173332 | 0.0003996 |
| TP53I13    | -0.1241764 | 0.0004025 |
| NDRG1      | -0.240277  | 0.0004041 |
| TMEM59     | -0.2055585 | 0.0004042 |
| AC090630.1 | 0.1129898  | 0.0004048 |
| PALB2      | 0.0551832  | 0.0004062 |
| AC079781.5 | 0.0777263  | 0.0004089 |
| TMEM259    | -0.1729876 | 0.0004128 |
| LNX2       | -0.147655  | 0.0004214 |
| DNAAF5     | 0.0674661  | 0.0004245 |
| ALKBH3     | 0.0913956  | 0.0004248 |
| PPP1R7     | 0.1432091  | 0.0004285 |
| C3orf33    | 0.0600438  | 0.0004331 |
| OGFOD2     | 0.0754177  | 0.0004348 |
| CD34       | -0.0873813 | 0.0004379 |
| NPR3       | 0.1986723  | 0.0004394 |
| ARMC1      | 0.0969758  | 0.0004395 |
| SULT1A1    | 0.1350297  | 0.0004401 |
| ZNF622     | -0.1382788 | 0.0004407 |
| JAK1       | 0.1015996  | 0.0004409 |
| DHRS7B     | 0.1437158  | 0.0004412 |
| NEK6       | -0.1601061 | 0.0004418 |
| ATP6V0B    | 0.1660739  | 0.0004457 |
| ACSL3      | -0.1557747 | 0.0004486 |
| ACSL5      | 0.0997716  | 0.0004504 |
| UBL7-AS1   | 0.0858468  | 0.0004666 |
| ZMYM3      | 0.0938082  | 0.0004702 |
| TRMT112    | 0.2062527  | 0.0004705 |
| Z97192.1   | 0.060707   | 0.0004743 |
| RFTN1      | 0.1181104  | 0.0004754 |



|           |            |           |
|-----------|------------|-----------|
| RPIA      | 0.1451757  | 0.0004764 |
| SNAPC1    | 0.0788472  | 0.0004773 |
| NAALADL1  | 0.0789436  | 0.000478  |
| PRDX2     | 0.1600647  | 0.0004781 |
| DAD1      | 0.1331743  | 0.0004792 |
| CLSTN1    | 0.0893353  | 0.0004821 |
| THUMPD2   | 0.0985564  | 0.0004847 |
| AIFM1     | 0.1306876  | 0.0004858 |
| ZNF33A    | 0.1177234  | 0.0004875 |
| AP1AR     | 0.113368   | 0.0004902 |
| WASHC5    | 0.1124867  | 0.0004924 |
| FAU       | -0.1414941 | 0.0004932 |
| AGGF1     | 0.1578384  | 0.0004947 |
| PTGER4    | 0.1608532  | 0.0004972 |
| COQ2      | 0.0838411  | 0.000498  |
| HEATR3    | 0.0870517  | 0.000507  |
| MT-ATP8   | 0.2000743  | 0.00051   |
| SPRYD7    | 0.076646   | 0.0005141 |
| C12orf73  | 0.113697   | 0.0005153 |
| DHRS4-AS1 | 0.1010865  | 0.0005169 |
| TNFSF4    | 0.1113754  | 0.0005193 |
| PSMB5     | 0.1543582  | 0.0005269 |
| WDPCP     | 0.1059112  | 0.0005312 |
| KIF1B     | -0.1094057 | 0.0005315 |
| MPP1      | 0.1863421  | 0.0005329 |
| TMEM238   | 0.0812844  | 0.0005352 |
| POU5F2    | 0.0538557  | 0.0005402 |
| NSFL1C    | -0.1626833 | 0.000549  |
| EXOSC8    | 0.1464325  | 0.0005509 |
| PSEN1     | -0.1998615 | 0.0005534 |
| GLB1      | 0.1070917  | 0.0005545 |
| ZNF382    | 0.0492368  | 0.0005562 |
| PRPS2     | 0.0846432  | 0.0005616 |
| AEBP1     | 0.0929208  | 0.0005697 |
| CCDC174   | -0.1678432 | 0.0005752 |
| NBEAL2    | -0.1713668 | 0.0005755 |
| PCBP1     | 0.1498471  | 0.0005768 |
| IFIT5     | 0.0713546  | 0.0005784 |
| NOL10     | 0.0995018  | 0.0005791 |
| MICU1     | 0.1380509  | 0.0005843 |
| RAE1      | -0.1494584 | 0.0005956 |
| DCP2      | 0.131678   | 0.0006006 |
| UBL4A     | -0.1665119 | 0.0006022 |
| GOSR1     | -0.166355  | 0.0006071 |
| SNAP29    | -0.1366855 | 0.0006071 |
| BLM       | 0.1112478  | 0.0006126 |
| ARFIP1    | 0.0547817  | 0.0006248 |
| CYB5RL    | 0.059709   | 0.0006288 |
| SYK       | 0.2481635  | 0.0006558 |
| MIS18A    | 0.1279367  | 0.0006683 |

|            |            |           |
|------------|------------|-----------|
| SH3KBP1    | 0.2344093  | 0.0006749 |
| BEND6      | 0.0930366  | 0.0006866 |
| MSN        | -0.2106252 | 0.0006886 |
| MICAL2     | -0.0945485 | 0.0006888 |
| FANCB      | 0.0485824  | 0.0006976 |
| CREBZF     | 0.1394437  | 0.0006994 |
| FAM200A    | 0.0403225  | 0.0006995 |
| RAB11B     | -0.1177322 | 0.0006996 |
| HEMK1      | 0.0932526  | 0.0007001 |
| SLC26A2    | 0.1149119  | 0.0007004 |
| VAMP3      | -0.1215572 | 0.0007182 |
| MPC1       | 0.1159637  | 0.0007197 |
| TMEM120B   | -0.1428149 | 0.0007199 |
| THAP9-AS1  | -0.1557835 | 0.0007339 |
| PIP4P2     | 0.1063073  | 0.0007367 |
| UBE2G2     | 0.2277711  | 0.0007393 |
| GALK2      | 0.1178377  | 0.0007534 |
| ORAI2      | -0.1323452 | 0.0007542 |
| ATP23      | 0.0927264  | 0.0007578 |
| TMEM167A   | -0.1092133 | 0.000758  |
| DFFB       | 0.0854404  | 0.0007669 |
| FTSJ3      | 0.1240967  | 0.0007784 |
| AL121933.2 | 0.0998867  | 0.0007821 |
| SGF29      | 0.0902119  | 0.0007902 |
| NR4A1      | -0.1322501 | 0.0007921 |
| CAMKK1     | -0.0971965 | 0.0007923 |
| F2R        | -0.1412855 | 0.0008015 |
| COPB1      | -0.161501  | 0.000802  |
| HLA-E      | -0.1600737 | 0.0008198 |
| AF117829.1 | 0.0977637  | 0.000834  |
| ABCB7      | 0.0994056  | 0.0008451 |
| TARS       | -0.1357037 | 0.0008472 |
| GABARAP    | -0.1988437 | 0.0008543 |
| EAF1       | -0.196194  | 0.0008564 |
| CAPN7      | 0.0866201  | 0.0008587 |
| ZNF585A    | 0.0883129  | 0.0008631 |
| PDRG1      | -0.1418251 | 0.0008664 |
| SLC22A4    | -0.0739748 | 0.000872  |
| MLF1       | -0.1031336 | 0.0008793 |
| RPL13      | 0.1218048  | 0.0008801 |
| SLC9B2     | 0.0872623  | 0.0008841 |
| TCF12      | 0.1101676  | 0.0008916 |
| TPX2       | 0.1336095  | 0.0008931 |
| ANAPC16    | 0.2128413  | 0.0009019 |
| ZNF26      | 0.1735636  | 0.0009048 |
| GALNT2     | -0.1715893 | 0.0009051 |
| PGBD2      | 0.0695268  | 0.0009094 |
| CIB1       | -0.1350465 | 0.0009113 |
| C9orf139   | 0.2741989  | 0.0009121 |
| ZNF90      | 0.074795   | 0.0009248 |

|            |            |           |
|------------|------------|-----------|
| METTL8     | 0.1706773  | 0.0009302 |
| ITGAX      | -0.2382779 | 0.0009393 |
| TGIF2      | -0.1687183 | 0.0009425 |
| CDCA4      | -0.1379205 | 0.0009512 |
| TPRG1L     | -0.0683847 | 0.0009642 |
| MFSD12     | -0.1374858 | 0.0009658 |
| MRPL51     | 0.154823   | 0.0009661 |
| PSMF1      | -0.1468501 | 0.0009699 |
| TDRD3      | 0.1170327  | 0.0009742 |
| NABP1      | 0.1355045  | 0.0009947 |
| ZNF429     | 0.1319106  | 0.0010011 |
| OAZ1       | -0.1852261 | 0.0010085 |
| MRPL4      | 0.203485   | 0.0010111 |
| NDUFAF3    | 0.1221273  | 0.0010114 |
| ABHD13     | 0.0874449  | 0.0010258 |
| QPRT       | 0.0843965  | 0.0010269 |
| POLR2G     | 0.1146652  | 0.0010286 |
| MRPS21     | 0.2062597  | 0.0010307 |
| JUN        | -0.0274008 | 0.0010358 |
| PLEKHA2    | -0.1563246 | 0.0010358 |
| SNX10      | -0.2499677 | 0.0010378 |
| SRP14      | -0.2054137 | 0.0010388 |
| USF1       | -0.0905023 | 0.0010423 |
| CCDC180    | 0.0612202  | 0.0010571 |
| ZNF280D    | 0.1958193  | 0.0010591 |
| CCDC69     | -0.1910898 | 0.0010638 |
| CUL5       | -0.1718324 | 0.0010645 |
| BSDC1      | -0.1150936 | 0.0010765 |
| RBM41      | 0.1258287  | 0.0010805 |
| ZFP3       | 0.063739   | 0.0010867 |
| AC026471.4 | 0.0836929  | 0.0011008 |
| TRPS1      | -0.2348529 | 0.0011052 |
| ATP6AP1    | -0.112469  | 0.0011068 |
| TUT7       | 0.1249622  | 0.0011234 |
| ZNF514     | 0.1023054  | 0.0011281 |
| OAS1       | 0.0774794  | 0.0011372 |
| CPA3       | 0.2471424  | 0.0011405 |
| KLC1       | -0.1668328 | 0.0011658 |
| ARRDC5     | 0.0635372  | 0.0011778 |
| ZNF512     | 0.1007151  | 0.0011795 |
| CMPK1      | 0.1735399  | 0.0011875 |
| HERC4      | 0.1330963  | 0.0011934 |
| MPV17      | 0.1324376  | 0.0011944 |
| CBX6       | 0.1262834  | 0.0011998 |
| GPBP1L1    | -0.1821919 | 0.0012013 |
| CPSF4      | 0.0717198  | 0.001204  |
| PLEK       | -0.2284122 | 0.001225  |
| TBL1X      | 0.0750452  | 0.0012257 |
| CXXC1      | 0.1160406  | 0.0012309 |
| SHPRH      | 0.1875817  | 0.001241  |

|          |            |           |
|----------|------------|-----------|
| ADNP2    | -0.19731   | 0.0012423 |
| TXNDC9   | -0.1533988 | 0.0012466 |
| NIT2     | 0.2154172  | 0.0012852 |
| RPS23    | 0.1135079  | 0.0012992 |
| DLST     | -0.1781847 | 0.0013047 |
| EPS8L2   | 0.0687001  | 0.0013055 |
| B3GALT6  | 0.1249076  | 0.0013071 |
| XXYLT1   | 0.0575346  | 0.0013088 |
| CBX4     | 0.0865616  | 0.0013151 |
| TIMP1    | -0.2195587 | 0.0013185 |
| RARS     | 0.0732059  | 0.0013339 |
| UFC1     | 0.0990779  | 0.001346  |
| ARPC4    | -0.1965766 | 0.001356  |
| PPID     | 0.1938833  | 0.0013579 |
| WDFY4    | 0.0922002  | 0.0013769 |
| SNRPD1   | 0.2230407  | 0.0013784 |
| APIP     | 0.1771162  | 0.0013804 |
| CCDC106  | 0.1139889  | 0.001388  |
| LYRM4    | 0.0644904  | 0.0013912 |
| KPNA1    | -0.0883111 | 0.0014076 |
| DCAF16   | -0.0540437 | 0.0014106 |
| ZNF428   | -0.1228132 | 0.0014168 |
| N6AMT1   | 0.0495053  | 0.0014178 |
| TMEM107  | 0.1605438  | 0.0014211 |
| RAB30-DT | 0.1109497  | 0.0014304 |
| EIF3M    | 0.1876596  | 0.0014403 |
| CETN2    | -0.1246577 | 0.0014535 |
| LXN      | 0.1233072  | 0.001456  |
| FBXL4    | 0.070876   | 0.0014571 |
| IRGQ     | -0.1197561 | 0.0014572 |
| LARP7    | 0.0845064  | 0.001459  |
| SPPL2A   | -0.1496028 | 0.0014624 |
| SLMAP    | -0.158757  | 0.0014683 |
| LAGE3    | 0.1922837  | 0.0014699 |
| TRIR     | -0.1272213 | 0.001475  |
| PSMD4    | 0.1293586  | 0.0014814 |
| SCRN1    | -0.1551285 | 0.0014831 |
| BTN3A1   | 0.0838864  | 0.001486  |
| KBTBD7   | 0.0879585  | 0.0014987 |
| SNRPD2   | 0.1584158  | 0.0015049 |
| C1orf43  | -0.1250898 | 0.0015086 |
| S100A1   | -0.224309  | 0.001511  |
| SLC35C2  | 0.0597525  | 0.0015112 |
| NCKAP1L  | 0.1536721  | 0.001513  |
| SCFD1    | -0.1446036 | 0.0015133 |
| MRPL32   | 0.1457692  | 0.0015172 |
| HMCES    | -0.1343726 | 0.0015202 |
| CAST     | -0.2166026 | 0.0015205 |
| SLC39A6  | 0.1453136  | 0.0015356 |
| MRPL54   | -0.1596681 | 0.001547  |

|           |            |           |
|-----------|------------|-----------|
| PTGR2     | 0.0762115  | 0.0015484 |
| ZNRD1     | 0.1753234  | 0.0015496 |
| TIGD2     | 0.0500603  | 0.0015521 |
| ZNF85     | 0.0844034  | 0.0015618 |
| EPN1      | -0.1552021 | 0.0015637 |
| UROD      | 0.1267859  | 0.0015723 |
| MRPL22    | -0.1702459 | 0.0015944 |
| VMA21     | 0.105862   | 0.001597  |
| RO60      | -0.1571354 | 0.0016115 |
| THNSL1    | 0.0655857  | 0.0016268 |
| FBXL15    | 0.1366416  | 0.0016326 |
| GATM      | 0.069446   | 0.0016554 |
| SLC27A2   | 0.0827024  | 0.0016687 |
| ADIPOR2   | -0.1669474 | 0.0016701 |
| RNF113A   | 0.142971   | 0.0016931 |
| MARK3     | -0.1263588 | 0.001699  |
| C12orf65  | -0.1679507 | 0.0017039 |
| RARG      | -0.0802141 | 0.0017058 |
| MDH2      | 0.0738229  | 0.0017139 |
| SRP19     | -0.162299  | 0.0017226 |
| SLC2A3    | -0.2125058 | 0.0017433 |
| SBNO1-AS1 | 0.0737129  | 0.001762  |
| ATG3      | -0.1438403 | 0.0017622 |
| CHORDC1   | 0.0896057  | 0.0017637 |
| SLC33A1   | 0.073766   | 0.0017706 |
| C17orf67  | 0.1241905  | 0.001772  |
| MRPL35    | 0.1234121  | 0.0017917 |
| UBA2      | 0.1793878  | 0.0018015 |
| LINC02762 | -0.1131851 | 0.00183   |
| SMIM27    | 0.0997174  | 0.0018333 |
| NORAD     | 0.1202369  | 0.0018344 |
| UIMC1     | -0.1738642 | 0.0018541 |
| HMG5      | 0.0694506  | 0.0018657 |
| MTMR3     | -0.0777699 | 0.0019016 |
| TRMT10B   | 0.127497   | 0.0019204 |
| ARHGAP18  | 0.2025558  | 0.0019282 |
| KANSL1    | -0.1550323 | 0.0019337 |
| GRK2      | 0.1382261  | 0.0019416 |
| BTBD10    | -0.1347781 | 0.0019454 |
| HPDL      | 0.0567006  | 0.0019515 |
| CGGBP1    | 0.1407661  | 0.001953  |
| GCHFR     | 0.1057473  | 0.0019547 |
| ARL6IP1   | 0.2169351  | 0.0019567 |
| NAPG      | -0.1787094 | 0.0019698 |
| COPS7A    | -0.009163  | 0.0019709 |
| SRD5A3    | 0.1755478  | 0.0019761 |
| MNAT1     | 0.1140631  | 0.0019772 |
| HELZ2     | -0.0779884 | 0.0019774 |
| POLE3     | 0.206014   | 0.0019902 |
| TTC27     | 0.1167902  | 0.0019951 |

|            |            |           |
|------------|------------|-----------|
| SDAD1      | 0.1253135  | 0.0020236 |
| ROCK1      | -0.27638   | 0.0020332 |
| ZDHHC18    | -0.1027658 | 0.0020467 |
| LTB        | -0.2381667 | 0.0020587 |
| PSMC4      | -0.1398677 | 0.0020689 |
| UBL7       | 0.0635289  | 0.0021383 |
| C2CD2      | 0.1070965  | 0.0021539 |
| LY6E       | -0.2056755 | 0.0021609 |
| ZNF692     | 0.0767666  | 0.0021875 |
| GALNT4     | -0.1385675 | 0.0021883 |
| DDA1       | -0.1507978 | 0.0021986 |
| MAN2A2     | 0.0761595  | 0.0022223 |
| AC090114.2 | -0.1321603 | 0.0022457 |
| COA5       | 0.1311305  | 0.0022543 |
| GMCL1      | 0.171666   | 0.0022597 |
| PIEZO1     | -0.0560572 | 0.0022669 |
| MRPL11     | 0.1391911  | 0.002267  |
| EFTUD2     | 0.103559   | 0.0022709 |
| AC027097.2 | 0.0494742  | 0.002288  |
| HAUS1      | 0.1112771  | 0.0023299 |
| FAM200B    | 0.0643828  | 0.0023364 |
| BRD2       | -0.1792608 | 0.0023509 |
| LINC02361  | -0.0771713 | 0.0023514 |
| STAT2      | 0.1254007  | 0.0023518 |
| TGFBR1     | -0.1951962 | 0.0023714 |
| POLD4      | -0.108145  | 0.002375  |
| TXNDC12    | 0.1201844  | 0.0023825 |
| LCORL      | 0.1395996  | 0.0023837 |
| ATF5       | -0.1496107 | 0.0023941 |
| SLC22A18   | -0.0572539 | 0.0023989 |
| CWC27      | 0.177173   | 0.0024032 |
| HMGCR      | -0.1882232 | 0.0024081 |
| CD59       | 0.1558662  | 0.0024097 |
| SUMO1      | -0.1989724 | 0.0024186 |
| AP003068.2 | -0.079715  | 0.0024295 |
| UBXN4      | -0.1636725 | 0.002435  |
| BCKDHA     | 0.1159329  | 0.0024383 |
| TGOLN2     | 0.1389382  | 0.0024468 |
| EGLN1      | 0.1053585  | 0.0024469 |
| ALDH16A1   | -0.0704414 | 0.0024746 |
| SPAG7      | -0.1508949 | 0.0025259 |
| SPTAN1     | -0.1792774 | 0.0025321 |
| LINC01023  | -0.0749393 | 0.0025553 |
| AGXT       | 0.2180529  | 0.0025588 |
| TRAPPC3    | 0.1106624  | 0.0025626 |
| MAFK       | -0.1317783 | 0.0025848 |
| NTMT1      | -0.1212897 | 0.0026022 |
| ANKLE2     | -0.1866661 | 0.0026053 |
| PWWP2A     | 0.1112259  | 0.002634  |
| BAX        | 0.1693936  | 0.0026421 |

|            |            |           |
|------------|------------|-----------|
| HTATIP2    | 0.1180769  | 0.0026533 |
| AFF4       | -0.2027529 | 0.0026673 |
| BCCIP      | 0.1075635  | 0.002671  |
| PHYH       | 0.1045898  | 0.0026879 |
| ASB13      | 0.0688504  | 0.002692  |
| IP6K1      | -0.1536792 | 0.0026938 |
| BBS10      | 0.0635831  | 0.0027157 |
| LRRC26     | 0.1443852  | 0.0027165 |
| RPS18      | 0.1019152  | 0.0028041 |
| TRMT5      | 0.0650088  | 0.002825  |
| ENDOV      | -0.0973344 | 0.0028313 |
| ALG13      | 0.0631134  | 0.0028402 |
| NFIL3      | 0.0757882  | 0.0028603 |
| RAB3D      | -0.0979567 | 0.0028637 |
| IFIT2      | 0.0344488  | 0.0028648 |
| POLD2      | 0.1500564  | 0.0028799 |
| OSTM1      | 0.0775835  | 0.0028811 |
| SNHG17     | 0.1006997  | 0.0029026 |
| AP002387.2 | 0.0808636  | 0.0029119 |
| FAM30A     | -0.1571601 | 0.0029177 |
| AC011939.2 | -0.0649125 | 0.0029362 |
| ANP32E     | 0.2254724  | 0.0029411 |
| MPP6       | 0.1051637  | 0.0029461 |
| PLEKHA5    | 0.1686738  | 0.0029463 |
| PARP11     | 0.0877439  | 0.0029719 |
| KIAA1549   | 0.0605902  | 0.002983  |
| DGKA       | -0.1285124 | 0.0029955 |
| CCDC136    | 0.0971678  | 0.0029964 |
| FAM120C    | 0.0616596  | 0.0030389 |
| NSUN2      | 0.0795811  | 0.0031225 |
| ATP13A2    | -0.1296811 | 0.003127  |
| KRIT1      | 0.1199652  | 0.0031573 |
| WDR27      | 0.1061108  | 0.0031574 |
| NGRN       | -0.1563319 | 0.0032026 |
| NTHL1      | 0.1234502  | 0.0032113 |
| AC010359.3 | -0.0591778 | 0.0032475 |
| PCYT1A     | -0.101257  | 0.0032593 |
| TSTD1      | -0.2360524 | 0.0032629 |
| RBM4       | -0.243394  | 0.0032668 |
| ODC1       | -0.2039105 | 0.0033278 |
| MRC2       | 0.05923    | 0.0034031 |
| ASB8       | -0.181923  | 0.0034538 |
| HAUS4      | 0.0806426  | 0.0034604 |
| WDR82      | -0.1669681 | 0.0034782 |
| PIK3R1     | 0.2037423  | 0.0035118 |
| TOPORS     | 0.0979243  | 0.0035304 |
| LCP1       | 0.2533492  | 0.0035325 |
| MANBA      | 0.1814302  | 0.0035543 |
| ORC3       | 0.1015389  | 0.0035584 |
| ATP6V1E2   | 0.0442677  | 0.0035698 |

|            |            |           |
|------------|------------|-----------|
| SYNJ2BP    | 0.1112362  | 0.0035949 |
| PMF1       | -0.1595611 | 0.0036022 |
| IGHM       | -0.1875011 | 0.0036608 |
| ST8SIA4    | -0.0047    | 0.0037254 |
| RBM33      | -0.1359807 | 0.0037316 |
| KIZ        | 0.1061183  | 0.0037418 |
| SOS2       | 0.0741967  | 0.0037594 |
| AC026979.2 | -0.1354194 | 0.0037742 |
| TNRC18     | 0.1098352  | 0.0037872 |
| NIN        | 0.2127011  | 0.0038157 |
| FAM126B    | -0.1635641 | 0.0038342 |
| DFFA       | 0.1368731  | 0.0038416 |
| CASD1      | 0.0724288  | 0.0038466 |
| LINC00923  | 0.0550946  | 0.0038742 |
| CHKB-DT    | 0.0564675  | 0.0038884 |
| MT-CO2     | 0.1168661  | 0.0038946 |
| TEX264     | 0.1625041  | 0.0038984 |
| AL355488.1 | 0.0476146  | 0.0039239 |
| COMMD9     | 0.140885   | 0.0039272 |
| TTC28-AS1  | 0.0608499  | 0.0039355 |
| IPO8       | 0.1295797  | 0.0039774 |
| TMEM161A   | 0.0610871  | 0.0039802 |
| NOL4L      | -0.1577982 | 0.0039883 |
| Z93930.2   | 0.0766751  | 0.0040027 |
| FARSB      | 0.1288716  | 0.0040496 |
| COX7C      | 0.1545529  | 0.0040811 |
| LINC00623  | 0.0866495  | 0.004088  |
| ZNF195     | 0.1179027  | 0.0040961 |
| HSPA1A     | 0.0694159  | 0.0041033 |
| WDR49      | -0.127233  | 0.0041235 |
| BTD        | 0.0708477  | 0.0041478 |
| NSMCE1     | 0.1972394  | 0.0041725 |
| NME3       | 0.1751692  | 0.004178  |
| SEC61G     | -0.089189  | 0.0041954 |
| GMFB       | -0.1828793 | 0.0042164 |
| MIER2      | -0.059569  | 0.0042306 |
| ALS2       | 0.1134766  | 0.0042392 |
| PCYOX1L    | 0.0702369  | 0.0042404 |
| PIK3R5     | -0.1131644 | 0.0042451 |
| FAM117B    | 0.0720947  | 0.0042812 |
| TFRC       | -0.2657771 | 0.0042936 |
| GEMIN4     | 0.0651044  | 0.0043189 |
| RFC4       | 0.0578313  | 0.0043252 |
| GNB2       | -0.1289892 | 0.0043395 |
| SF3B4      | -0.1369411 | 0.0043757 |
| SOGA1      | 0.0739868  | 0.0044328 |
| ZMYND11    | 0.1322548  | 0.0044464 |
| EEFSEC     | 0.1043093  | 0.0044669 |
| CSNK1G3    | -0.1646123 | 0.0045072 |
| DDX52      | -0.011273  | 0.0045293 |



|            |            |           |
|------------|------------|-----------|
| EIF2A      | 0.1830673  | 0.0045313 |
| ENO1       | -0.1720143 | 0.0045641 |
| JAGN1      | 0.0985996  | 0.0045671 |
| AC005670.3 | 0.1886609  | 0.0046109 |
| SF3B1      | -0.2299297 | 0.0046196 |
| MAD2L1BP   | -0.1195242 | 0.0046261 |
| DHX40      | 0.1174763  | 0.0046323 |
| CEP192     | 0.1207898  | 0.004633  |
| SGTB       | -0.0888323 | 0.0046736 |
| HIPK3      | -0.1535608 | 0.0046836 |
| GPD1L      | 0.0456019  | 0.0046894 |
| CKAP5      | 0.1049157  | 0.0046928 |
| DDX39A     | 0.1592682  | 0.004711  |
| EPC1       | 0.0259199  | 0.0047227 |
| HACD2      | 0.0733537  | 0.0047229 |
| ZNF543     | 0.0258159  | 0.0047832 |
| TTC32      | 0.1142443  | 0.004797  |
| EIPR1      | 0.0553085  | 0.0048316 |
| SEMA6B     | -0.0873238 | 0.0048499 |
| THOC1      | 0.143043   | 0.0048816 |
| ARFGEF1    | 0.0205466  | 0.0048821 |
| SYF2       | -0.1771317 | 0.0049073 |
| MDM1       | 0.1077672  | 0.0049171 |
| RNF208     | 0.054252   | 0.0050246 |
| COPE       | -0.1544745 | 0.0050457 |
| HOXA3      | 0.1432975  | 0.0050493 |
| RPL18A     | -0.1737621 | 0.0050628 |
| LIX1L      | 0.0873773  | 0.0050941 |
| CCDC117    | 0.1091252  | 0.0050947 |
| C2orf69    | 0.0970887  | 0.0051201 |
| IRAK3      | 0.2267668  | 0.0051495 |
| PDIK1L     | 0.0577493  | 0.0051534 |
| PRR5L      | 0.1261321  | 0.0051566 |
| SFXN4      | 0.1644553  | 0.0051714 |
| GGPS1      | 0.119884   | 0.0052077 |
| HOTAIRM1   | -0.1300189 | 0.0052451 |
| ESD        | 0.18477    | 0.0052624 |
| SURF4      | -0.1440428 | 0.0052625 |
| NFRKB      | 0.0585498  | 0.00529   |
| ZBED3-AS1  | 0.0523651  | 0.0052984 |
| MFSD14C    | 0.1032735  | 0.0053334 |
| HYPK       | 0.0388233  | 0.0053624 |
| EFL1       | 0.0687614  | 0.0053996 |
| ENY2       | -0.0405861 | 0.0054006 |
| ATP6V1A    | -0.1444556 | 0.0054155 |
| CREBRF     | -0.2308598 | 0.0054239 |
| BISPR      | 0.0822375  | 0.005444  |
| BCL2L12    | 0.0607547  | 0.0054926 |
| GLE1       | 0.0701331  | 0.0055059 |
| SEPTIN9    | -0.1774267 | 0.0055083 |

|            |            |           |
|------------|------------|-----------|
| MZF1-AS1   | 0.1016082  | 0.0055219 |
| PCCA-DT    | 0.069757   | 0.0055633 |
| NUP62      | -0.0906518 | 0.0055995 |
| XIST       | 0.19734    | 0.0056046 |
| CLK4       | -0.1671939 | 0.0056049 |
| WDR48      | -0.1374464 | 0.0056061 |
| LINC00662  | 0.0864405  | 0.0056223 |
| GIGYF2     | 0.1420964  | 0.0056463 |
| TAPBPL     | -0.1433566 | 0.0056598 |
| TMEM35B    | 0.2055584  | 0.0056943 |
| DPY19L4    | 0.1467247  | 0.0056988 |
| PIGN       | 0.12084    | 0.005715  |
| STAT4      | -0.0876131 | 0.0057324 |
| PIGH       | 0.0475566  | 0.0057418 |
| CCDC107    | -0.1522056 | 0.0057999 |
| SDHAF4     | 0.0659326  | 0.0058031 |
| TYSND1     | 0.0676094  | 0.0058313 |
| PGP        | 0.146598   | 0.0058823 |
| ERGIC1     | -0.1308668 | 0.0058954 |
| MTRF1      | 0.0666232  | 0.0059137 |
| EIF3F      | -0.1345181 | 0.005967  |
| AMPD2      | -0.0599872 | 0.0060622 |
| DENR       | 0.1750402  | 0.0061288 |
| SLTM       | 0.1538253  | 0.0061605 |
| LPIN2      | -0.1597373 | 0.0062087 |
| MRPS27     | 0.1188157  | 0.0062609 |
| NDST1      | 0.0381856  | 0.0063166 |
| GP1BB      | 0.2194229  | 0.0063358 |
| GFM2       | 0.0539857  | 0.0063484 |
| STX16      | 0.1522125  | 0.0064015 |
| COMMD10    | 0.0991544  | 0.0064129 |
| ZNF579     | -0.1474571 | 0.0064522 |
| MFSD10     | -0.156113  | 0.0064989 |
| CLDND2     | -0.1435532 | 0.0065128 |
| AC026401.3 | -0.1073895 | 0.006547  |
| ING1       | 0.0347684  | 0.0065635 |
| PDE3B      | 0.1241734  | 0.0065716 |
| IFIH1      | 0.1531671  | 0.006582  |
| ZNF808     | 0.0488085  | 0.0065938 |
| TAF15      | 0.2203897  | 0.0066011 |
| GAB3       | 0.0097283  | 0.0066108 |
| SIGMAR1    | 0.1035768  | 0.0066301 |
| RFT1       | 0.0821442  | 0.0066661 |
| NLRP1      | -0.1180998 | 0.0066732 |
| CLASP2     | 0.0661244  | 0.0066776 |
| GPR180     | 0.0716594  | 0.0066891 |
| MYLIP      | 0.0363012  | 0.0066897 |
| CLK2       | 0.0515425  | 0.0067861 |
| CPVL       | 0.1445757  | 0.0069236 |
| HIST1H2AK  | 0.0660682  | 0.0069388 |

|            |            |           |
|------------|------------|-----------|
| ZNF814     | 0.1291713  | 0.0070257 |
| RFNG       | 0.1122713  | 0.0070375 |
| DNAJB14    | -0.2000307 | 0.0070414 |
| CDC14A     | -0.186763  | 0.0070503 |
| DERL2      | -0.1737426 | 0.0070517 |
| ELOA       | 0.0272877  | 0.0070938 |
| ATPSCKMT   | 0.0785382  | 0.007102  |
| MIPEP      | 0.0545947  | 0.00711   |
| MAEL       | 0.0431132  | 0.0071103 |
| SNRPA      | -0.182458  | 0.0071293 |
| ERG28      | 0.0062023  | 0.0071402 |
| TRAPPC2L   | 0.1133327  | 0.007148  |
| STK35      | -0.0673554 | 0.0071572 |
| PMM2       | 0.104287   | 0.0071626 |
| TRANK1     | 0.1815433  | 0.0072174 |
| WDR43      | 0.2230064  | 0.0072316 |
| ZNF785     | 0.0864947  | 0.0072834 |
| MPV17L     | 0.0917177  | 0.0073126 |
| ADSL       | 0.1352286  | 0.0073211 |
| HDAC6      | 0.0390211  | 0.0073717 |
| HIBCH      | 0.121858   | 0.0073946 |
| SLC7A5     | -0.1843363 | 0.0074249 |
| UBE3C      | 0.0922342  | 0.0074357 |
| PSMC1      | -0.1473208 | 0.007533  |
| UXT        | 0.1286033  | 0.0075571 |
| HMG2       | 0.1146379  | 0.0075915 |
| ZYG11B     | 0.0808784  | 0.0076103 |
| ZNF618     | 0.0927056  | 0.0076211 |
| DSE        | -0.0365118 | 0.0076546 |
| RABL6      | 0.1120334  | 0.007677  |
| EIF2B1     | 0.1343655  | 0.0077066 |
| HLX        | 0.0850137  | 0.0077176 |
| ZNF486     | 0.0966319  | 0.0077281 |
| GID8       | -0.0839655 | 0.0077347 |
| SCARB2     | -0.1869615 | 0.007771  |
| GLMN       | 0.1500583  | 0.0078124 |
| AQR        | 0.1117494  | 0.0078293 |
| CPD        | 0.060845   | 0.0078372 |
| EID1       | -0.1509051 | 0.0079014 |
| APMAP      | 0.147026   | 0.0079375 |
| TRG-AS1    | 0.324661   | 0.0079811 |
| ZC3H12C    | 0.0660976  | 0.0079863 |
| LINC01515  | 0.061658   | 0.0080255 |
| G2E3       | 0.0761735  | 0.0080483 |
| NADK2      | 0.0917713  | 0.0080776 |
| AC016747.1 | -0.0971591 | 0.0080817 |
| B3GNTL1    | 0.133174   | 0.0081313 |
| ANXA4      | 0.085132   | 0.0081679 |
| GNS        | 0.1226803  | 0.0082251 |
| SSX2IP     | -0.131169  | 0.0082302 |

|            |            |           |
|------------|------------|-----------|
| ZNF519     | 0.0768308  | 0.0082433 |
| RDX        | -0.1321132 | 0.0082927 |
| TNKS2      | -0.0886691 | 0.0082936 |
| CBWD2      | 0.0417796  | 0.0083782 |
| RNFT1      | 0.0457744  | 0.0085624 |
| RNF111     | -0.1295246 | 0.0085748 |
| QSER1      | 0.0732104  | 0.0086104 |
| C12orf66   | 0.08965    | 0.0086133 |
| PSTPIP1    | -0.1215963 | 0.008638  |
| AP000845.1 | 0.0601786  | 0.0086932 |
| XRN2       | 0.22106    | 0.0087107 |
| GGA2       | 0.1120036  | 0.0087151 |
| DHFR2      | 0.0623878  | 0.0087426 |
| CAMKK2     | 0.1315578  | 0.0088737 |
| NXT1       | -0.0856653 | 0.00888   |
| SLC15A4    | -0.1216244 | 0.0089784 |
| KCNMB3     | 0.070841   | 0.00898   |
| C1orf174   | 0.0100858  | 0.0089978 |
| SLC19A1    | 0.0815584  | 0.0090087 |
| STBD1      | -0.0645166 | 0.0091295 |
| AMMECR1    | 0.0323194  | 0.0091365 |
| TMEM101    | 0.0906953  | 0.0092575 |
| LRRC28     | 0.0555955  | 0.0092666 |
| PXK        | 0.1208591  | 0.0093221 |
| KDEL2      | -0.1015979 | 0.0093546 |
| OAS2       | 0.0970783  | 0.0093709 |
| YES1       | -0.1432192 | 0.0093866 |
| GET1       | -0.1322638 | 0.0093976 |
| HMOX2      | -0.0887428 | 0.0094361 |
| KLHL8      | 0.0834364  | 0.0094738 |
| HIST1H2AE  | -0.1198362 | 0.0094995 |
| MINPP1     | 0.0728169  | 0.0096315 |
| EMC4       | 0.042479   | 0.0096924 |
| VGLL4      | -0.145983  | 0.0097077 |
| COL9A2     | 0.0558436  | 0.0097136 |
| ANAPC1     | 0.0802311  | 0.0097551 |
| AC092944.1 | 0.0653648  | 0.0097671 |
| METRNL     | -0.1465929 | 0.0098188 |
| MEIS1      | -0.2126705 | 0.0098536 |
| SNRNP27    | 0.1025989  | 0.0098633 |
| WASHC2C    | 0.0994665  | 0.0099637 |
| ZC3H14     | 0.0870934  | 0.0099773 |
| PDCD7      | 0.2001435  | 0.0100127 |
| FNTA       | 0.0345331  | 0.0100335 |
| CCDC77     | 0.0392827  | 0.0101641 |
| DYRK3      | -0.1837238 | 0.010194  |
| RBPMS      | -0.1427809 | 0.0102174 |
| CEP128     | 0.0692464  | 0.0102518 |
| ZNF783     | 0.0403346  | 0.0102791 |
| UTF1       | -0.1862351 | 0.0103283 |

|           |            |           |
|-----------|------------|-----------|
| LINC01857 | 0.0704649  | 0.0104144 |
| HELQ      | 0.0806064  | 0.0104457 |
| KIF16B    | 0.0536268  | 0.0105631 |
| RC3H2     | -0.237308  | 0.0106531 |
| CDC34     | -0.1247962 | 0.010676  |
| MRPL16    | 0.1303122  | 0.0106883 |
| CCL28     | 0.0800877  | 0.0107093 |
| DRAP1     | -0.1888922 | 0.0107415 |
| TMEM67    | -0.0866656 | 0.010821  |
| NOA1      | 0.0955877  | 0.010826  |
| LINC01138 | 0.0357472  | 0.0108622 |
| MRPL36    | 0.1408272  | 0.0109271 |
| MAP10     | 0.0760426  | 0.0110499 |
| CETN3     | 0.1008105  | 0.0110721 |
| PAFAH1B3  | 0.0757429  | 0.011087  |
| WDHD1     | 0.0715835  | 0.0110941 |
| INPP4A    | -0.0656277 | 0.0111109 |
| EIF3G     | -0.1794407 | 0.0111211 |
| TSNAX     | 0.1314498  | 0.0111612 |
| IL3RA     | -0.2004855 | 0.0111754 |
| AP2M1     | -0.1128645 | 0.0111865 |
| WDR61     | 0.1555594  | 0.011208  |
| CD109     | -0.1619754 | 0.0112591 |
| TOR1AIP1  | 0.103599   | 0.0112822 |
| CDKN1C    | -0.2409266 | 0.0113087 |
| STIM1     | 0.027677   | 0.0113311 |
| CABLES1   | 0.0672081  | 0.0113775 |
| PSAP      | 0.0602057  | 0.0113979 |
| RNF38     | -0.177729  | 0.011441  |
| TIMM10B   | -0.1425671 | 0.0115463 |
| C8orf33   | 0.1176476  | 0.0116005 |
| FOXK1     | -0.0609694 | 0.0116521 |
| ARCN1     | 0.0129665  | 0.0116807 |
| ADAMDEC1  | 0.0893612  | 0.0117159 |
| ATP5F1B   | -0.1461697 | 0.0117825 |
| DIS3L     | 0.1270891  | 0.0118704 |
| CERS2     | 0.1101146  | 0.0119263 |
| ZFP28     | -0.0714203 | 0.0119314 |
| METTL2B   | 0.088864   | 0.0119612 |
| ZNF346    | 0.0561294  | 0.0119749 |
| REV3L     | -0.1243999 | 0.0120151 |
| ABRAXAS2  | -0.1098536 | 0.0120175 |
| UBE3A     | -0.1402254 | 0.0120849 |
| ZNF720    | 0.140028   | 0.0122383 |
| COQ8A     | 0.1147609  | 0.0122636 |
| TESK1     | -0.1018758 | 0.0122838 |
| METTL25   | 0.0639216  | 0.0123803 |
| SF3B2     | 0.1606133  | 0.0124769 |
| TRAPPC12  | 0.0994884  | 0.0125586 |
| PPHLN1    | -0.1698037 | 0.0125733 |

|            |            |           |
|------------|------------|-----------|
| NUP107     | 0.1071877  | 0.0126198 |
| GRK4       | 0.0358718  | 0.0126814 |
| ARHGAP11/  | 0.1010764  | 0.0126821 |
| PSMC6      | -0.1213212 | 0.0129523 |
| TMEM42     | 0.154367   | 0.0130173 |
| YIPF6      | -0.0736453 | 0.013064  |
| GNAQ       | 0.2287593  | 0.0131383 |
| RCAN3      | -0.1259968 | 0.0131682 |
| RIOK2      | 0.0522085  | 0.0131914 |
| SLC12A7    | -0.1299157 | 0.0131967 |
| FANCF      | 0.0979969  | 0.0132092 |
| CD300LF    | -0.110761  | 0.0132099 |
| ITFG2      | 0.0940497  | 0.0132434 |
| TEC        | 0.1618164  | 0.0132576 |
| SNRPG      | -0.0987169 | 0.0133832 |
| ZFAND5     | 0.042777   | 0.0134107 |
| MPZL3      | -0.0616891 | 0.0134237 |
| ZNF766     | 0.1194508  | 0.0134641 |
| COIL       | 0.1169238  | 0.013494  |
| SPTSSA     | 0.1151227  | 0.0135419 |
| ITPKC      | -0.0602547 | 0.0135592 |
| ENGASE     | 0.0289709  | 0.0135809 |
| SLC44A2    | -0.086838  | 0.0136643 |
| NKRF       | 0.0217075  | 0.0136822 |
| PPP2R5A    | 0.0684766  | 0.013709  |
| VPS72      | 0.0881568  | 0.0137217 |
| GSTM2      | 0.0557362  | 0.0137524 |
| NSMCE4A    | 0.0516156  | 0.0137825 |
| NDFIP1     | -0.1592119 | 0.0138008 |
| AC007038.1 | 0.0522956  | 0.0138164 |
| PLCL2      | 0.0451953  | 0.0138981 |
| CAPN10     | -0.0576383 | 0.0139023 |
| HOXA6      | 0.1031035  | 0.0139405 |
| COX17      | 0.0724021  | 0.0139505 |
| MBD3       | 0.0748646  | 0.0139794 |
| MMP2       | 0.1547703  | 0.0140364 |
| CAAP1      | 0.1306095  | 0.0140558 |
| AL138756.1 | 0.0591167  | 0.0140705 |
| KMT2A      | -0.1227241 | 0.0140901 |
| CAVIN2     | 0.1137873  | 0.0141219 |
| PCGF3      | -0.1207073 | 0.0141627 |
| LINC01534  | 0.031521   | 0.0142178 |
| CAPRIN2    | 0.0145162  | 0.0143234 |
| COLGALT1   | 0.1074012  | 0.0143286 |
| L3MBTL3    | 0.0660832  | 0.0143515 |
| RAD51-AS1  | 0.156332   | 0.014406  |
| GM2A       | 0.0963838  | 0.0144352 |
| AC093673.1 | -0.1216743 | 0.0144834 |
| UBN2       | 0.1013746  | 0.0144882 |
| DDX17      | 0.1729504  | 0.0145249 |

|            |            |           |
|------------|------------|-----------|
| PLD6       | 0.0559261  | 0.0146315 |
| PLEKHM1    | -0.154821  | 0.0146704 |
| PDGFC      | -0.0386383 | 0.0147736 |
| CDC26      | 0.1010541  | 0.0148025 |
| TMEM230    | 0.1629307  | 0.0148514 |
| SNAP23     | 0.1740988  | 0.0148595 |
| IDH2       | -0.1443716 | 0.0149123 |
| PAGR1      | 0.0391662  | 0.0149745 |
| GPAT3      | -0.1862795 | 0.0149869 |
| CDK11A     | 0.0855437  | 0.0150725 |
| TRIM66     | 0.0537426  | 0.0151367 |
| RNF135     | 0.0770201  | 0.0151703 |
| ACAD9      | 0.053092   | 0.0152427 |
| CPEB2      | -0.0786358 | 0.0153733 |
| EFCAB14    | 0.1213534  | 0.0154755 |
| AC005072.1 | -0.0862938 | 0.0154785 |
| SLC35B1    | -0.1489118 | 0.0154967 |
| AC092428.1 | -0.0566741 | 0.015521  |
| AL356599.1 | 0.0859854  | 0.0155224 |
| TSN        | 0.0738401  | 0.0155674 |
| PTEN       | 0.1930203  | 0.0155775 |
| ARL16      | -0.0272046 | 0.0155874 |
| LINC00476  | 0.077812   | 0.0155924 |
| SLC4A7     | 0.0957699  | 0.0156974 |
| TMEM150A   | 0.0773215  | 0.0156984 |
| NUDCD3     | 0.0927581  | 0.0157015 |
| KCTD10     | -0.128354  | 0.0159086 |
| AL513128.2 | 0.0795164  | 0.0159335 |
| BNIP3      | 0.0758173  | 0.0159358 |
| INTS2      | 0.0782858  | 0.0159571 |
| SLFN12     | 0.04649    | 0.0161356 |
| RPS6KA4    | -0.1287023 | 0.0164273 |
| PITRM1     | 0.0664747  | 0.0164937 |
| TYROBP     | 0.2269899  | 0.0165839 |
| ARHGAP23   | -0.1124073 | 0.0165928 |
| PACC1      | 0.0459582  | 0.0166175 |
| MEF2C-AS1  | 0.0847168  | 0.0166379 |
| MAX        | -0.1712161 | 0.0166787 |
| HACD4      | 0.1334326  | 0.0167364 |
| EPM2AIP1   | 0.2051318  | 0.0167439 |
| ADAR       | -0.0647423 | 0.0167903 |
| TYW1B      | 0.0393693  | 0.0169532 |
| ATP1B1     | 0.015423   | 0.017018  |
| NUP214     | 0.1034076  | 0.0170356 |
| ZNF124     | 0.0677307  | 0.0170951 |
| ACBD6      | 0.1722571  | 0.0172731 |
| FAR1       | -0.1701257 | 0.0173382 |
| AC008014.1 | 0.0667244  | 0.017352  |
| BCL9L      | -0.1526792 | 0.0173554 |
| IL2RA      | -0.240817  | 0.0174558 |

|            |            |           |
|------------|------------|-----------|
| ACOT11     | 0.1407137  | 0.0175038 |
| MRPS18A    | -0.1307165 | 0.0175457 |
| THADA      | 0.1272314  | 0.0176232 |
| YAE1       | 0.0519267  | 0.0176742 |
| TRIB3      | -0.125275  | 0.0176914 |
| PRKAB1     | -0.0993694 | 0.017709  |
| XPOT       | 0.1660971  | 0.0179228 |
| GDI2       | 0.1659824  | 0.017924  |
| SMIM29     | -0.1122428 | 0.018069  |
| NDUFS7     | 0.164842   | 0.0181176 |
| FCGRT      | 0.084388   | 0.0181285 |
| FOCAD      | 0.0497941  | 0.0181459 |
| ZFX        | 0.109904   | 0.0182273 |
| KIF18A     | -0.1135951 | 0.0182699 |
| HELZ       | -0.1586211 | 0.0183373 |
| ZNF3       | -0.1350443 | 0.0184916 |
| ZBTB8A     | -0.1745373 | 0.018506  |
| API5       | 0.0949067  | 0.0187928 |
| KLF16      | -0.1502638 | 0.0189661 |
| PLEKHG2    | -0.0573349 | 0.0190938 |
| PURB       | -0.0673904 | 0.0191077 |
| SNHG8      | 0.1835794  | 0.0191692 |
| NISCH      | 0.0359269  | 0.0193344 |
| STAU1      | -0.1544734 | 0.0193427 |
| PRELID2    | 0.0696383  | 0.0195908 |
| SLC25A39   | -0.0769364 | 0.0196215 |
| INTS3      | 0.0487269  | 0.0196688 |
| UBE2Q1     | 0.175597   | 0.0196699 |
| HIPK2      | -0.184274  | 0.0198276 |
| RACK1      | 0.1332418  | 0.0200901 |
| TRIQK      | 0.1010673  | 0.0201617 |
| SF3A2      | -0.1522929 | 0.0201699 |
| TARS2      | 0.0941045  | 0.0202825 |
| POLK       | -0.1468443 | 0.0203594 |
| CNOT7      | 0.1020437  | 0.0203818 |
| FUNDC1     | 0.1480726  | 0.0205179 |
| CNOT9      | -0.1530493 | 0.020555  |
| GATC       | 0.0823588  | 0.0205698 |
| ENTPD5     | 0.0404134  | 0.0205721 |
| ATP6AP2    | 0.0447909  | 0.0205779 |
| B3GALNT1   | 0.0816675  | 0.0206902 |
| RAB44      | 0.0576305  | 0.0206966 |
| BUB3       | 0.1054819  | 0.0207874 |
| BCL2A1     | -0.0702103 | 0.0208999 |
| TCTEX1D1   | 0.0567719  | 0.0209252 |
| ATP6V1B2   | -0.1201885 | 0.0210604 |
| FNBP4      | -0.2043556 | 0.0211031 |
| DGCR6L     | 0.1149135  | 0.0212172 |
| DTWD2      | 0.0591115  | 0.0212261 |
| AL132709.8 | 0.0682517  | 0.0212939 |



|            |            |           |
|------------|------------|-----------|
| USP33      | 0.1194859  | 0.0213393 |
| SND1-IT1   | 0.0385767  | 0.0214129 |
| ZFP36L2    | 0.2365662  | 0.021417  |
| AL157392.3 | 0.0592472  | 0.021585  |
| EEPD1      | -0.1443587 | 0.0216149 |
| HSPBAP1    | 0.0137364  | 0.0216861 |
| GABPB1     | -0.1154982 | 0.0217048 |
| MAP7D3     | 0.1761597  | 0.0217422 |
| EIF3J-DT   | 0.1377307  | 0.0218051 |
| TTBK2      | 0.1210542  | 0.0221149 |
| IKBKB      | 0.0139643  | 0.0223028 |
| ACLY       | 0.1444142  | 0.022451  |
| NOP2       | 0.0848685  | 0.0225155 |
| RITA1      | 0.0868425  | 0.0225496 |
| GTPBP6     | 0.158647   | 0.0227127 |
| ICK        | 0.0585478  | 0.0227532 |
| ERICH1     | 0.1959594  | 0.0227871 |
| TRIM5      | 0.1372623  | 0.0227952 |
| TCF4       | 0.4116081  | 0.0228885 |
| ANAPC13    | 0.156732   | 0.0230306 |
| SPOUT1     | 0.075928   | 0.0230869 |
| AC011462.5 | -0.0715491 | 0.0232339 |
| DBT        | 0.1071487  | 0.0234476 |
| ABI2       | -0.1082591 | 0.0237665 |
| FAM133B    | -0.21648   | 0.023806  |
| TMEM260    | 0.11117    | 0.0239205 |
| TMEM185A   | -0.0947306 | 0.0240647 |
| CBR4       | 0.0808436  | 0.0241731 |
| FAM222B    | -0.0679449 | 0.02418   |
| XBP1       | 0.2607411  | 0.024356  |
| MRPS17     | 0.1195138  | 0.0245082 |
| MBD4       | 0.1291434  | 0.0245492 |
| NRXN2      | 0.0664953  | 0.0245637 |
| PAK1IP1    | 0.1268658  | 0.0246559 |
| FAM172A    | 0.0871749  | 0.0247036 |
| USP27X     | -0.1062296 | 0.0248685 |
| HDHD2      | 0.1382829  | 0.0249022 |
| KYAT3      | 0.0591164  | 0.0249973 |
| ELAC2      | 0.0886929  | 0.0250019 |
| TRMT61A    | 0.0555948  | 0.0253563 |
| EIF2S3     | 0.1944801  | 0.0254502 |
| ZNF589     | 0.0487651  | 0.0254937 |
| MPP7       | -0.0909362 | 0.0255867 |
| SLCO4A1    | -0.0974745 | 0.0255898 |
| PRELID3B   | -0.114369  | 0.0255906 |
| NIFK-AS1   | 0.1332869  | 0.0258494 |
| KANSL1L    | 0.0884744  | 0.0262244 |
| PDIA5      | 0.0501677  | 0.0264165 |
| AC025171.2 | 0.1568665  | 0.0267979 |
| KLHDC4     | 0.0499829  | 0.0273269 |

|            |            |           |
|------------|------------|-----------|
| TMEM159    | 0.107712   | 0.0277523 |
| ELK4       | -0.0622843 | 0.0279273 |
| ZFP90      | 0.088088   | 0.0279636 |
| CTSS       | 0.2208352  | 0.0281647 |
| RASA3      | 0.0813314  | 0.0281894 |
| MTFR1      | 0.0510767  | 0.0282522 |
| RPP21      | 0.1495624  | 0.0282905 |
| LBHD1      | 0.0519168  | 0.0285204 |
| CCDC58     | 0.0965548  | 0.0285605 |
| TATDN2     | -0.0696589 | 0.0285721 |
| UQCRQ      | 0.1198418  | 0.0285722 |
| TM7SF2     | 0.0859588  | 0.0286038 |
| MMAB       | 0.1067545  | 0.0286387 |
| UBR5       | -0.2407148 | 0.0286403 |
| ATP5F1A    | 0.1576025  | 0.0287279 |
| BNIP3L     | -0.1276376 | 0.0287391 |
| TMEM182    | 0.0449901  | 0.028789  |
| OGFOD3     | 0.0678588  | 0.0288395 |
| ZNF70      | 0.0759179  | 0.0291575 |
| ASB3       | 0.0554374  | 0.0292128 |
| MFHAS1     | 0.111628   | 0.0292398 |
| EPB41L2    | 0.0890261  | 0.0296249 |
| RINL       | 0.0675814  | 0.030037  |
| SUSD6      | -0.1314325 | 0.0300428 |
| ELL        | -0.1252471 | 0.0300915 |
| TMEM64     | 0.0597789  | 0.0301282 |
| ANKRD26    | 0.1106664  | 0.0302404 |
| ZFP14      | 0.1226123  | 0.0303356 |
| MFNG       | 0.0060848  | 0.0303725 |
| AC007686.3 | -0.0540528 | 0.0304094 |
| LAPTM4B    | 0.0772456  | 0.0304267 |
| CCND2      | 0.1054738  | 0.0306047 |
| CNOT1      | -0.1825798 | 0.0306582 |
| NFE2L3     | 0.1063475  | 0.0307369 |
| DDX31      | 0.0732517  | 0.0307541 |
| ATXN1L     | -0.0980466 | 0.0309359 |
| UBE2I      | -0.2050833 | 0.0309415 |
| CYB5D2     | 0.1039926  | 0.0309432 |
| C19orf53   | 0.1790826  | 0.0311669 |
| C9orf40    | 0.0566595  | 0.0311757 |
| LRRC27     | 0.0560706  | 0.0312221 |
| CCDC24     | -0.0623828 | 0.0312888 |
| RRP1B      | 0.2153582  | 0.0313891 |
| ALG10B     | 0.0791272  | 0.0314497 |
| ACTR10     | -0.1345647 | 0.0315338 |
| TMEM181    | 0.0521779  | 0.0317482 |
| BRCA1      | 0.1024047  | 0.032075  |
| TAGAP      | -0.1899993 | 0.0325802 |
| EEF2K      | 0.0943597  | 0.0329081 |
| GTDC1      | 0.1056821  | 0.032927  |

|            |            |           |
|------------|------------|-----------|
| TMEM147-A  | 0.0837209  | 0.0329913 |
| GMIP       | -0.1169763 | 0.0331266 |
| CCNH       | -0.0473371 | 0.0331898 |
| UBXN2A     | -0.1221892 | 0.0332316 |
| PAN3-AS1   | 0.1205708  | 0.0332318 |
| ZNF813     | 0.0585775  | 0.0332776 |
| WDR4       | 0.0466574  | 0.0335343 |
| CISD2      | 0.1149967  | 0.0335973 |
| GKAP1      | 0.0738894  | 0.0336217 |
| PPP3CC     | -0.0949101 | 0.0336422 |
| RBPJ       | -0.1610885 | 0.0337464 |
| PAK1       | 0.1347205  | 0.0338508 |
| RPP38      | -0.042768  | 0.0338585 |
| SLC12A2    | -0.0657299 | 0.0338645 |
| EIF5A      | -0.1861167 | 0.0338699 |
| EFCAB11    | 0.0597533  | 0.0340245 |
| FIBP       | 0.0485864  | 0.0341671 |
| ZNF71      | -0.061858  | 0.0345767 |
| CHRAC1     | 0.0771468  | 0.0348026 |
| ZNF264     | -0.1170148 | 0.0348229 |
| REL        | -0.1120645 | 0.0348415 |
| TMEM219    | 0.0206783  | 0.0348524 |
| SDHAF2     | -0.1736396 | 0.0349358 |
| TELO2      | 0.0235895  | 0.0349958 |
| EEF2KMT    | 0.0796325  | 0.0350443 |
| MT-ND4L    | 0.182665   | 0.035146  |
| IRAK1BP1   | 0.0843786  | 0.0351761 |
| TYW3       | 0.1326054  | 0.0351864 |
| PIM2       | 0.1499877  | 0.0353565 |
| SASS6      | 0.0945196  | 0.035433  |
| SLC45A3    | 0.1134601  | 0.0359774 |
| C16orf58   | 0.0435337  | 0.0360536 |
| TRIM33     | -0.1870217 | 0.0362808 |
| RPA3       | 0.0647939  | 0.0363648 |
| RPA1       | 0.1259427  | 0.0365499 |
| AC124248.1 | 0.0646128  | 0.0365848 |
| FER        | 0.0738129  | 0.037025  |
| RPL14      | 0.0970676  | 0.0371257 |
| TRAPPC6A   | 0.1293975  | 0.0373439 |
| CALM3      | -0.1598141 | 0.0373588 |
| KATNA1     | -0.1319259 | 0.0375746 |
| CCDC9      | -0.0819562 | 0.037854  |
| SOX12      | 0.0632681  | 0.0381563 |
| POFUT1     | 0.0548317  | 0.0381929 |
| PAM        | 0.0422519  | 0.0385117 |
| CRNDE      | 0.0689033  | 0.0386648 |
| UBE2R2     | -0.2238902 | 0.0388106 |
| AC246817.2 | 0.0422278  | 0.0391567 |
| ANTKMT     | 0.1440573  | 0.0392522 |
| CEP97      | 0.0857662  | 0.0394703 |

|            |            |           |
|------------|------------|-----------|
| AL021155.5 | 0.0440055  | 0.0394982 |
| SPATS2     | 0.0987292  | 0.0395384 |
| ARMC6      | 0.0883776  | 0.03954   |
| LYPLA2     | -0.0961845 | 0.0399665 |
| IL2RG      | -0.2203602 | 0.0400324 |
| PHF13      | -0.0723799 | 0.0400981 |
| SRSF11     | 0.0965053  | 0.0402309 |
| CCDC59     | 0.0851501  | 0.0402888 |
| GSK3A      | -0.166553  | 0.0402971 |
| C10orf88   | 0.0576349  | 0.0406922 |
| SAC3D1     | 0.1205379  | 0.0408776 |
| MICAL1     | -0.0722883 | 0.0409104 |
| RRP8       | 0.02473    | 0.0411029 |
| INSR       | 0.0906178  | 0.0411361 |
| LYSMD2     | 0.0689686  | 0.0411674 |
| HIST1H2BD  | -0.1006796 | 0.0416057 |
| ETNK1      | 0.0782034  | 0.041708  |
| VPS13B     | 0.099033   | 0.0420012 |
| EVI5       | 0.082196   | 0.0423676 |
| SLC25A40   | 0.0663691  | 0.042387  |
| DIDO1      | -0.0609782 | 0.0427324 |
| HACL1      | 0.0761296  | 0.0430048 |
| TFB2M      | 0.0193612  | 0.0432574 |
| AC138150.1 | 0.0885745  | 0.0435469 |
| RCHY1      | -0.1053694 | 0.043689  |
| FAM214A    | -0.092022  | 0.0438196 |
| WDR33      | -0.0412708 | 0.0444925 |
| SIL1       | -0.1015569 | 0.0445677 |
| C15orf40   | 0.0921933  | 0.0445914 |
| ZBTB6      | 0.0783601  | 0.044632  |
| SMS        | 0.1860692  | 0.0446399 |
| SH2D3C     | -0.1715775 | 0.044892  |
| AKR1A1     | 0.1027138  | 0.0449493 |
| DMXL1      | 0.1014342  | 0.0450809 |
| ZFP91      | -0.1865978 | 0.0452481 |
| TNRC6A     | -0.0680799 | 0.0452587 |
| TMTC2      | 0.0617322  | 0.0453058 |
| WASHC2A    | 0.0063382  | 0.0458973 |
| HPS3       | 0.1122954  | 0.0460553 |
| MED30      | 0.0505816  | 0.0464011 |
| TRMT1L     | 0.0763271  | 0.0465092 |
| MX2        | 0.0864022  | 0.046756  |
| IMMP1L     | 0.1056371  | 0.0468023 |
| NACC1      | -0.1023427 | 0.0468885 |
| NDUFAF1    | 0.0605762  | 0.0469829 |
| C9orf43    | 0.0975665  | 0.0470922 |
| HEXB       | 0.0989125  | 0.0471005 |
| NCOA7      | 0.0957446  | 0.0471491 |
| PAK4       | -0.0271194 | 0.0474312 |
| UHRF2      | -0.1263953 | 0.0477332 |

|            |            |           |
|------------|------------|-----------|
| PNPLA4     | 0.1123022  | 0.0477581 |
| IFT52      | 0.037828   | 0.0479072 |
| EDEM1      | -0.0965931 | 0.0480701 |
| FIG4       | 0.0635     | 0.0482627 |
| DENND2D    | 0.0444447  | 0.0488842 |
| ZFAND2A    | -0.179496  | 0.0489679 |
| RABL3      | -0.0796442 | 0.0490525 |
| RAB11FIP2  | 0.0735807  | 0.0492606 |
| RUNX1      | 0.2470236  | 0.0493363 |
| ANPEP      | 0.1591197  | 0.0493695 |
| STX8       | 0.110655   | 0.0494203 |
| MRPS18C    | 0.1206681  | 0.049425  |
| TRIM14     | 0.0991789  | 0.0497631 |
| TRIAP1     | 0.0962675  | 0.0502552 |
| NEK7       | 0.0576955  | 0.0502842 |
| MTRF1L     | -0.1820135 | 0.0504151 |
| GLCCI1     | 0.0595582  | 0.0504327 |
| RGS14      | -0.1371826 | 0.0505618 |
| L3MBTL2    | 0.0765585  | 0.0505625 |
| XYLT1      | 0.1158956  | 0.0505766 |
| TCP1       | -0.1821545 | 0.050736  |
| CERK       | -0.1156576 | 0.0509471 |
| ANGEL2     | 0.1266611  | 0.0510224 |
| TECR       | 0.0873355  | 0.0511858 |
| DPY19L1    | 0.0605193  | 0.0512136 |
| EEF1AKMT3  | 0.057384   | 0.0514357 |
| POFUT2     | -0.0955808 | 0.0516198 |
| FCF1       | 0.069164   | 0.0517228 |
| MRPL45     | 0.1056101  | 0.0517946 |
| FBXO3      | -0.0831219 | 0.0520559 |
| METTL4     | 0.1039585  | 0.0520877 |
| IMMT       | 0.1180592  | 0.0525572 |
| GYG1       | 0.0297249  | 0.0526887 |
| HESX1      | 0.068275   | 0.0527131 |
| TRIM4      | 0.0947949  | 0.0527693 |
| C12orf10   | -0.0691378 | 0.0528657 |
| TNIP2      | -0.1342468 | 0.0528923 |
| C2orf74    | 0.0897064  | 0.0531265 |
| HDAC8      | 0.1280674  | 0.0531503 |
| COQ7       | 0.0894278  | 0.0531632 |
| PCNA       | 0.1801242  | 0.0532637 |
| FERMT3     | -0.1266646 | 0.0533806 |
| PLAAT4     | -0.0791249 | 0.0540153 |
| BRD4       | -0.109371  | 0.054439  |
| MRPS6      | -0.0397096 | 0.0546278 |
| MCTP2      | 0.0136226  | 0.0551214 |
| COMMD3     | 0.07778    | 0.0552241 |
| AC027097.1 | 0.064921   | 0.0553189 |
| LINC01278  | 0.104016   | 0.0555108 |
| ERCC2      | 0.0559862  | 0.0555557 |

|           |            |           |
|-----------|------------|-----------|
| GPN2      | -0.0439058 | 0.0556288 |
| ATG4B     | -0.065273  | 0.0558025 |
| BLMH      | 0.084197   | 0.0558657 |
| CTSF      | 0.0710961  | 0.0563144 |
| CDC5L     | -0.053503  | 0.0568178 |
| ZBTB8OS   | 0.1034234  | 0.0568559 |
| HNRNPC    | 0.1084072  | 0.0570231 |
| EEA1      | 0.2009095  | 0.0574205 |
| FLOT2     | -0.0083178 | 0.0580717 |
| ZNF626    | 0.0876378  | 0.0580893 |
| STX10     | 0.1269892  | 0.058221  |
| SLC11A2   | 0.0262408  | 0.0582962 |
| CHMP4B    | -0.1630046 | 0.0584002 |
| KLF3-AS1  | -0.1441796 | 0.0587543 |
| YBX1      | -0.1278328 | 0.0588788 |
| HNRNPUL2  | 0.1544468  | 0.0589076 |
| FOPNL     | 0.1448988  | 0.0595268 |
| CZIB      | 0.1254288  | 0.0597758 |
| TERF1     | 0.1189587  | 0.0606266 |
| NCOA5     | 0.0492268  | 0.0607934 |
| TMEM256   | 0.1587694  | 0.060827  |
| GPRC5D-AS | 0.0589343  | 0.0610127 |
| SMIM10L1  | 0.1097612  | 0.0612343 |
| HIVEP2    | -0.1900881 | 0.0613602 |
| SS18      | -0.189547  | 0.0616245 |
| HDAC1     | 0.198623   | 0.0623272 |
| CCAR1     | -0.1171617 | 0.0626246 |
| RIC8A     | -0.115775  | 0.062689  |
| STARD7    | 0.1105006  | 0.0626979 |
| SNHG16    | 0.1677444  | 0.063063  |
| RPS7      | 0.079689   | 0.0634501 |
| SMARCA2   | 0.07913    | 0.0644027 |
| C1orf52   | -0.1348655 | 0.06474   |
| STRN4     | -0.1259389 | 0.0650123 |
| ZBTB2     | -0.0909088 | 0.06516   |
| CBFA2T2   | 0.0542538  | 0.0654937 |
| TCN2      | -0.0726987 | 0.0655498 |
| PSMB8     | 0.2152561  | 0.0670528 |
| KPNA2     | -0.1198417 | 0.067162  |
| ENG       | -0.0894464 | 0.0674241 |
| CD63      | -0.1418739 | 0.0676678 |
| VKORC1L1  | 0.080957   | 0.0676823 |
| RBL1      | 0.0581234  | 0.0677095 |
| RBM15B    | -0.103577  | 0.0677174 |
| SDF2L1    | 0.0430923  | 0.0679982 |
| MPI       | 0.0790751  | 0.0681114 |
| SRRM2     | 0.1734346  | 0.0682419 |
| SLC2A4RG  | 0.1272809  | 0.0684472 |
| ITCH      | -0.1852544 | 0.0687332 |
| MTX1      | -0.1223797 | 0.0693677 |

|            |            |           |
|------------|------------|-----------|
| CHPT1      | 0.0899491  | 0.0693978 |
| FOXN2      | -0.1602569 | 0.0694022 |
| UBA5       | 0.1371695  | 0.0700476 |
| SDE2       | -0.1486733 | 0.0704671 |
| INTS6-AS1  | 0.0573082  | 0.0705356 |
| MRPL14     | 0.1071203  | 0.0710428 |
| ZNF234     | 0.0733516  | 0.0711267 |
| GRINA      | 0.0289851  | 0.0713011 |
| ABCA5      | 0.0542625  | 0.0713116 |
| GLRX5      | 0.0671671  | 0.0714082 |
| LTBR       | -0.1744021 | 0.0714115 |
| CUX1       | 0.0960812  | 0.0715764 |
| TPGS1      | 0.0992729  | 0.0716805 |
| RPS24      | 0.0928051  | 0.0717539 |
| ATP11C     | 0.0755066  | 0.0717663 |
| ERCC1      | -0.0439661 | 0.0720855 |
| TMEM86B    | -0.0734289 | 0.0723358 |
| DESI2      | -0.0522704 | 0.0723966 |
| U2AF1L4    | -0.0577084 | 0.0724999 |
| PELI1      | -0.1148506 | 0.0727207 |
| SEPTIN2    | -0.0962738 | 0.073205  |
| YOD1       | 0.0460433  | 0.0732134 |
| CYFIP1     | 0.1479818  | 0.0732409 |
| SRP9       | 0.1722066  | 0.0740731 |
| IQSEC1     | -0.0764997 | 0.0744579 |
| TMEM177    | 0.0821326  | 0.0747335 |
| TCEA1      | 0.0801048  | 0.0748039 |
| HCCS       | -0.1243287 | 0.0748826 |
| AL592183.1 | 0.0540727  | 0.0749615 |
| CMTM2      | -0.1111038 | 0.0751896 |
| DENND11    | 0.0589679  | 0.0752532 |
| CPT1A      | 0.0850301  | 0.0753679 |
| NUP37      | 0.1045078  | 0.0754032 |
| DOCK11     | 0.0784894  | 0.0756763 |
| GSPT1      | 0.2075273  | 0.0759493 |
| HOXB3      | -0.131739  | 0.0760485 |
| HYAL2      | 0.0562258  | 0.0761991 |
| B3GALNT2   | 0.0805322  | 0.0762655 |
| ELMO2      | -0.0834048 | 0.0763659 |
| TMEM50B    | -0.0918234 | 0.0764137 |
| HGS        | -0.1543088 | 0.0765662 |
| MLLT11     | -0.1074953 | 0.0771244 |
| HNRNPA1P4  | -0.1730863 | 0.0774813 |
| ST3GAL5    | -0.1113112 | 0.0779639 |
| RLIM       | -0.2250128 | 0.0783288 |
| TMEM19     | 0.0496138  | 0.078344  |
| SARNP      | -0.1243944 | 0.0787505 |
| PARPBP     | 0.0373913  | 0.0788988 |
| RNF19A     | -0.2188123 | 0.0789783 |
| NSMAF      | 0.0532151  | 0.0791997 |

|            |            |           |
|------------|------------|-----------|
| BCAP31     | -0.1255348 | 0.0795532 |
| AGO1       | 0.0306669  | 0.0796066 |
| FAM104B    | 0.061969   | 0.0797918 |
| B4GALT3    | -0.0860049 | 0.0808213 |
| ZSCAN30    | 0.1237064  | 0.0811581 |
| TOM1       | -0.0941321 | 0.0812117 |
| TMEM144    | 0.0957325  | 0.0813336 |
| CHID1      | 0.1362083  | 0.0820213 |
| PARVG      | 0.1056637  | 0.082699  |
| WAC        | -0.1919563 | 0.0828612 |
| SLC50A1    | -0.1279294 | 0.0829637 |
| CASP1      | 0.0756155  | 0.083157  |
| AC132192.2 | 0.0283159  | 0.0835116 |
| SNRPA1     | -0.1826785 | 0.083836  |
| ANAPC7     | 0.1079881  | 0.0839205 |
| TASOR2     | 0.0978103  | 0.0840237 |
| SUCLG1     | 0.1717622  | 0.0843323 |
| AC018638.7 | 0.0511506  | 0.0844515 |
| ZSCAN5A    | 0.05998    | 0.0846894 |
| ANKRD10-IT | 0.0633922  | 0.0851372 |
| IFT122     | 0.0613132  | 0.0856135 |
| SMURF1     | -0.1133664 | 0.0857102 |
| SMC6       | 0.143105   | 0.0859746 |
| OSBP       | -0.1204229 | 0.0860829 |
| ZBTB25     | 0.0110415  | 0.0864598 |
| PCCA       | 0.0447329  | 0.0869504 |
| PLEKHA3    | 0.0598721  | 0.0879117 |
| PCGF6      | 0.0533413  | 0.0880746 |
| SESN1      | -0.1920392 | 0.0891386 |
| OXNAD1     | 0.0552162  | 0.0895276 |
| MAP1A      | 0.2834097  | 0.0898102 |
| LUC7L      | -0.0602493 | 0.0899298 |
| ALDOC      | 0.058581   | 0.0900381 |
| TSPAN5     | 0.0658056  | 0.0902847 |
| CSNK1E     | -0.0696555 | 0.0904559 |
| CDK17      | -0.1394306 | 0.0906154 |
| NAB1       | -0.1451019 | 0.0912884 |
| EDRF1      | 0.0469441  | 0.0914236 |
| SPIRE1     | 0.0992406  | 0.0916959 |
| MED31      | -0.0969346 | 0.0923451 |
| AL513550.1 | 0.0519715  | 0.0924404 |
| ZMYND8     | 0.1367926  | 0.0925423 |
| KANSL3     | -0.1166707 | 0.0946177 |
| FBXW7      | -0.1371842 | 0.0951557 |
| IKZF4      | 0.0606934  | 0.0952672 |
| SLFN11     | 0.0954623  | 0.0952806 |
| COPS9      | 0.1677865  | 0.095299  |
| SLC35E2A   | 0.0948752  | 0.0957599 |
| OBSCN      | 0.0859324  | 0.0958412 |
| LENG1      | -0.0703288 | 0.0968376 |



|            |            |           |
|------------|------------|-----------|
| VAC14      | 0.0381831  | 0.0972011 |
| ATF7IP     | 0.1138441  | 0.0973448 |
| MARVELD1   | 0.0787749  | 0.0974318 |
| ZNF665     | 0.0839826  | 0.0975398 |
| CU638689.4 | 0.0590573  | 0.0976284 |
| NUDT12     | 0.042965   | 0.0978121 |
| MAGEH1     | 0.0410336  | 0.0982402 |
| TMEM265    | 0.044802   | 0.0984543 |
| ITPR2      | 0.2164228  | 0.0992134 |
| MLC1       | -0.1014337 | 0.0996749 |
| RBL2       | 0.0955076  | 0.1003886 |
| ZNF880     | -0.0964912 | 0.1003973 |
| EMC1       | 0.0570847  | 0.1017537 |
| ALYREF     | 0.1294818  | 0.1030896 |
| TRIM38     | 0.1715725  | 0.1031528 |
| CTSG       | 0.2588083  | 0.1038304 |
| ZNF354A    | 0.0889049  | 0.1039348 |
| PPP2R5D    | 0.0374216  | 0.1040134 |
| NRDE2      | 0.0543221  | 0.1040212 |
| ECSIT      | 0.0450891  | 0.1041609 |
| DOCK5      | -0.1830964 | 0.1041733 |
| AARS2      | 0.0549448  | 0.1042452 |
| FDPS       | 0.1026941  | 0.1046038 |
| VPS50      | 0.0407402  | 0.1046057 |
| PSMC5      | 0.0835505  | 0.1050019 |
| AC027644.3 | -0.0436908 | 0.1053978 |
| FOXN3      | -0.1466056 | 0.1055992 |
| HAGH       | 0.0830097  | 0.1056398 |
| FAHD2B     | 0.0566341  | 0.1056806 |
| CCDC138    | 0.0515658  | 0.105765  |
| RSRP1      | 0.2458577  | 0.1059308 |
| MED25      | -0.1433063 | 0.1061188 |
| GDI1       | -0.1211969 | 0.1062495 |
| PUS3       | 0.0795409  | 0.1063694 |
| ARHGDIB    | -0.164514  | 0.1063748 |
| PTK2B      | -0.0923955 | 0.106819  |
| SLC35A2    | -0.0694809 | 0.1071637 |
| SDCBP2-AS  | 0.0299156  | 0.1074771 |
| TRIO       | 0.0561669  | 0.1075783 |
| WDR45B     | -0.0954003 | 0.1080035 |
| DET1       | 0.0477987  | 0.1085378 |
| ZBED5-AS1  | 0.0757817  | 0.1088178 |
| CNOT11     | -0.0033897 | 0.1089998 |
| TMEM11     | -0.0907418 | 0.1102552 |
| SRSF4      | -0.172211  | 0.110279  |
| ZSWIM4     | -0.0831642 | 0.1106585 |
| URM1       | -0.1133253 | 0.1110059 |
| OPA1       | -0.145118  | 0.1110586 |
| MTOR       | 0.0770956  | 0.1111754 |
| TMEM51     | -0.096141  | 0.1114421 |

|            |            |           |
|------------|------------|-----------|
| AC084198.2 | 0.0519099  | 0.1117042 |
| UBXN1      | -0.1090645 | 0.1117676 |
| AL033543.1 | -0.0701132 | 0.1124621 |
| SCO2       | -0.0831608 | 0.1124879 |
| IFI27L2    | 0.1617657  | 0.1129858 |
| FBXO30     | -0.100074  | 0.1130027 |
| PHACTR1    | 0.1099802  | 0.1132567 |
| METTL18    | 0.1198204  | 0.1136397 |
| FUT7       | -0.1181029 | 0.1137345 |
| MAPK8      | -0.131262  | 0.1140642 |
| VPS29      | -0.0445892 | 0.1140761 |
| RRP1       | 0.1263241  | 0.1142406 |
| C11orf49   | 0.0506665  | 0.1144924 |
| MRPS10     | 0.0991834  | 0.1145207 |
| SNRNP70    | 0.0810443  | 0.1146064 |
| ZNF44      | -0.1189562 | 0.1149485 |
| DYNC1LI2   | -0.1389994 | 0.1150468 |
| ARHGAP45   | -0.1164418 | 0.1157486 |
| MSMO1      | -0.1498584 | 0.1158564 |
| CDK11B     | 0.0338178  | 0.1159959 |
| CNOT6L     | 0.0192162  | 0.1163242 |
| GHDC       | 0.0947239  | 0.1174433 |
| RAB11A     | -0.1577646 | 0.1174615 |
| NOSIP      | 0.0526555  | 0.1177026 |
| HTRA3      | 0.0561554  | 0.1183491 |
| CDK14      | 0.0701866  | 0.1185808 |
| SLC48A1    | -0.0615902 | 0.1188436 |
| CNIH1      | -0.1604966 | 0.1189068 |
| ZBTB47     | 0.033169   | 0.1194306 |
| ECI1       | 0.0543464  | 0.1194601 |
| CRY2       | -0.0649109 | 0.1197053 |
| RRAGB      | 0.0886827  | 0.1197514 |
| CRELD2     | -0.1013731 | 0.119813  |
| UNK        | -0.0912611 | 0.1212723 |
| PRKACA     | 0.0388865  | 0.1225016 |
| RAD51C     | 0.090736   | 0.1232604 |
| ATF2       | -0.1259588 | 0.123422  |
| FIGNL1     | 0.064044   | 0.1237441 |
| ZDHHC14    | 0.0713096  | 0.1239106 |
| MGST3      | -0.0281434 | 0.1248104 |
| CMPK2      | 0.0679879  | 0.1254458 |
| SFT2D1     | -0.0353657 | 0.12578   |
| GOLGA8A    | 0.0682138  | 0.126404  |
| HSPB11     | 0.1337687  | 0.127047  |
| MT-ND2     | 0.0975846  | 0.1273174 |
| DHRX       | 0.0776708  | 0.1281389 |
| LINC01150  | 0.0583261  | 0.1286531 |
| EIF1AD     | -0.1034655 | 0.1286694 |
| LONP2      | 0.1102436  | 0.1289118 |
| ACAP1      | -0.0508767 | 0.1292858 |

|           |            |           |
|-----------|------------|-----------|
| ABHD8     | 0.0533319  | 0.1293169 |
| HMBS      | 0.0714561  | 0.1293872 |
| MARCH5    | -0.0977454 | 0.1295661 |
| SULF2     | -0.0732209 | 0.1295885 |
| MTCH1     | -0.1897142 | 0.1295985 |
| SNTB1     | 0.0824378  | 0.130101  |
| BUD13     | -0.0862611 | 0.1310789 |
| LINC00667 | 0.125216   | 0.1313852 |
| UGGT1     | 0.1082248  | 0.1315177 |
| RPS26     | 0.1497818  | 0.1335692 |
| SPACA9    | -0.1003718 | 0.1338541 |
| RMDN1     | 0.1092577  | 0.1351994 |
| CEBPZOS   | 0.1271532  | 0.1352482 |
| S100PBP   | 0.095147   | 0.1352818 |
| CENPV     | 0.0749559  | 0.1352932 |
| TTC28     | 0.0183212  | 0.1355082 |
| JPX       | 0.1819086  | 0.1366718 |
| IRAK1     | -0.0396167 | 0.1371228 |
| ZGPAT     | 0.0036726  | 0.1373895 |
| RPS12     | 0.0863358  | 0.1388155 |
| PEX11A    | 0.0285676  | 0.1390027 |
| FAHD2A    | 0.0804026  | 0.13953   |
| GBP4      | 0.0963571  | 0.1399444 |
| ZNF165    | -0.0920084 | 0.1402129 |
| TMEM184B  | -0.0764229 | 0.1403158 |
| ZKSCAN1   | 0.1072511  | 0.140559  |
| NAP1L4    | 0.0847122  | 0.1407144 |
| NR2C1     | -0.0394491 | 0.1417187 |
| C3orf38   | 0.0139536  | 0.1419404 |
| BTBD6     | 0.0477885  | 0.1425304 |
| MED4      | -0.1473742 | 0.1431665 |
| KDM5C     | -0.074784  | 0.1432826 |
| POGK      | 0.0578029  | 0.1438578 |
| USF2      | 0.1534042  | 0.1444958 |
| GSTM3     | 0.0487721  | 0.1450539 |
| PHF21A    | 0.0710685  | 0.1451882 |
| SLC25A11  | 0.1117418  | 0.1469228 |
| ZBTB4     | -0.1250893 | 0.1469493 |
| VRK1      | 0.1002917  | 0.1471537 |
| NCBP3     | -0.162325  | 0.1484987 |
| NXPE3     | 0.0378196  | 0.1493283 |
| ZDHHC3    | 0.018405   | 0.1507713 |
| ZBED3     | 0.0883387  | 0.1509799 |
| ACTR3     | -0.1492887 | 0.1518748 |
| PPP1R8    | -0.0609035 | 0.1524371 |
| ABCF2     | 0.0984651  | 0.152503  |
| REEP4     | -0.0629299 | 0.1534064 |
| PSMB7     | -0.0604358 | 0.1540317 |
| SEN2      | -0.0764988 | 0.156066  |
| HIGD2A    | 0.0970371  | 0.1563625 |

|            |            |           |
|------------|------------|-----------|
| MZT2A      | 0.048021   | 0.1564555 |
| DEGS2      | 0.0468738  | 0.1565538 |
| USP53      | -0.0423889 | 0.1566385 |
| RNF41      | -0.1377272 | 0.1571165 |
| CLN6       | 0.0868237  | 0.1574834 |
| BMS1       | 0.1066998  | 0.1579544 |
| DRAM2      | 0.1373438  | 0.1585981 |
| SOCS7      | 0.0437169  | 0.1593867 |
| S100A8     | 0.0616839  | 0.1595426 |
| HOXB5      | -0.1252126 | 0.1596671 |
| AK5        | 0.0953528  | 0.1605243 |
| H6PD       | 0.0625814  | 0.1607247 |
| P4HB       | -0.1149976 | 0.1616737 |
| SERPINF1   | -0.0863591 | 0.1616821 |
| NOL12      | 0.0410979  | 0.1618119 |
| MON1B      | 0.0860681  | 0.1621556 |
| KCNQ1OT1   | -0.3247818 | 0.1621679 |
| SRI        | 0.0758686  | 0.1633678 |
| ERBIN      | -0.1537888 | 0.1647042 |
| ZNF337-AS1 | 0.0440508  | 0.1651648 |
| RFX1       | -0.1105087 | 0.1653768 |
| GCN1       | 0.1047368  | 0.1654321 |
| ZFP64      | 0.0366989  | 0.1657125 |
| CREBL2     | 0.0439874  | 0.1659749 |
| PIAS4      | -0.1144139 | 0.1663295 |
| KCTD21-AS  | 0.0530893  | 0.1667424 |
| KIAA2013   | 0.0935466  | 0.167236  |
| CUEDC2     | 0.1028102  | 0.1672771 |
| AC074117.1 | 0.0490853  | 0.1674903 |
| PLD3       | -0.109255  | 0.1678456 |
| ZNF296     | -0.0756565 | 0.1682413 |
| MAP4K4     | 0.0949176  | 0.1694028 |
| BTN3A3     | 0.0414649  | 0.1696525 |
| RTF1       | -0.0373603 | 0.1701534 |
| MLYCD      | 0.0701883  | 0.1706402 |
| CLNK       | 0.0741294  | 0.1712499 |
| CSE1L      | 0.0773061  | 0.1716732 |
| SLC20A2    | 0.0808329  | 0.1724306 |
| CTBP2      | -0.1205982 | 0.1726327 |
| EVL        | -0.1031891 | 0.1726719 |
| LTK        | -0.0785356 | 0.1732345 |
| NOTCH2     | 0.0774346  | 0.1739062 |
| PACRGL     | 0.0579178  | 0.1740566 |
| AC245014.3 | 0.0652591  | 0.1742689 |
| CCDC137    | 0.0098089  | 0.1743513 |
| SLC38A7    | 0.0516043  | 0.1752877 |
| PGBD1      | 0.0142351  | 0.1756451 |
| SCAF8      | -0.088383  | 0.1758461 |
| LAIR1      | 0.1555327  | 0.1760744 |
| MRPL30     | 0.1099354  | 0.1762051 |

|            |            |           |
|------------|------------|-----------|
| BAG1       | 0.1188182  | 0.1762612 |
| ATXN2L     | -0.1057501 | 0.1763062 |
| NEMP2      | 0.0477658  | 0.1769109 |
| CEP76      | 0.0513792  | 0.1769844 |
| FLOT1      | -0.1831365 | 0.1771841 |
| PRCP       | 0.0021456  | 0.1778998 |
| PI4KB      | -0.08482   | 0.1787809 |
| CASZ1      | -0.0608549 | 0.178799  |
| C21orf91   | 0.0990241  | 0.1789876 |
| PDS5B      | 0.0321041  | 0.1794275 |
| UBE2E1     | -0.048096  | 0.1794524 |
| RGS3       | -0.1465316 | 0.1798564 |
| RRP15      | 0.1294409  | 0.1802751 |
| NABP2      | 0.0958173  | 0.1804084 |
| MAD2L1     | 0.1279645  | 0.1806207 |
| RSF1       | -0.1426227 | 0.1807959 |
| EDC4       | -0.0693333 | 0.1811967 |
| CFAP298    | 0.0536429  | 0.1815322 |
| IQCB1      | -0.0925111 | 0.182054  |
| CLTC       | -0.1714714 | 0.1822509 |
| TDP1       | 0.0437031  | 0.183359  |
| CPXM1      | -0.1064298 | 0.1837166 |
| COX11      | 0.1195914  | 0.1842578 |
| C1RL       | 0.1292477  | 0.184718  |
| LINC01341  | 0.0676315  | 0.1847503 |
| VAPB       | -0.0852139 | 0.1848879 |
| ASF1A      | 0.0670229  | 0.1849614 |
| WDR20      | -0.1040372 | 0.1871481 |
| TBKBP1     | -0.0785246 | 0.1875814 |
| PSMA3-AS1  | 0.0933098  | 0.1884194 |
| MR1        | 0.0828609  | 0.1889967 |
| GUF1       | 0.078976   | 0.1891502 |
| GTPBP3     | 0.0789358  | 0.1896933 |
| DPM2       | 0.119856   | 0.1901118 |
| SETD1B     | -0.0712679 | 0.190679  |
| CCNL2      | -0.1519942 | 0.1908271 |
| SLC25A5    | 0.1400166  | 0.1911564 |
| RASSF1     | 0.0143879  | 0.1920439 |
| GLO1       | 0.1505173  | 0.1926623 |
| AC073389.1 | 0.0380666  | 0.1927883 |
| MRTFB      | 0.029958   | 0.1931103 |
| SLC4A1AP   | 0.0761253  | 0.1953608 |
| KIAA1586   | 0.0601665  | 0.1955911 |
| NCAPD3     | 0.123188   | 0.1961281 |
| IFT172     | 0.0504246  | 0.1963637 |
| FANCL      | 0.0693236  | 0.1977595 |
| C16orf87   | 0.0602479  | 0.1986655 |
| SUSD1      | 0.1193944  | 0.1995958 |
| SLC22A5    | 0.0469419  | 0.1997649 |
| UBN1       | -0.0238016 | 0.2004359 |

|            |            |           |
|------------|------------|-----------|
| ARHGEF1    | -0.1502886 | 0.2012725 |
| AP2S1      | 0.1265979  | 0.2014515 |
| MRS2       | 0.0549746  | 0.2016101 |
| SMAP1      | 0.073453   | 0.2021386 |
| LIG3       | 0.092151   | 0.2029081 |
| STEAP3     | 0.0357465  | 0.2046788 |
| PSME4      | -0.1847444 | 0.205414  |
| DUSP12     | -0.0714944 | 0.206624  |
| ANP32B     | 0.1532862  | 0.206892  |
| APOC2      | 0.1850513  | 0.208083  |
| TMEM245    | 0.1255954  | 0.208449  |
| TMEM203    | 0.0732325  | 0.2090829 |
| ADRB2      | 0.1059799  | 0.2094783 |
| DHX32      | 0.0915674  | 0.2100955 |
| CSTF2T     | 0.0594537  | 0.2101597 |
| KCTD20     | 0.0510545  | 0.2107605 |
| INCENP     | 0.0515401  | 0.2107649 |
| FAS        | -0.1153277 | 0.2114322 |
| EZH2       | -0.1367355 | 0.211468  |
| MAP4K3-DT  | 0.1315114  | 0.2118762 |
| CEP350     | -0.1520876 | 0.2123601 |
| TRNAU1AP   | -0.0571148 | 0.212605  |
| NGDN       | -0.0665143 | 0.2130596 |
| MOAP1      | -0.0656302 | 0.2132101 |
| HCP5       | 0.0346092  | 0.2134543 |
| PRPF31     | 0.0921768  | 0.214062  |
| TNPO1      | 0.0071002  | 0.214528  |
| TAMM41     | 0.0405328  | 0.215086  |
| ETV6       | 0.2051531  | 0.2152833 |
| AP3B1      | 0.1433605  | 0.2158085 |
| BCAT2      | 0.0813054  | 0.2169092 |
| DDOST      | -0.0567121 | 0.217993  |
| IGFLR1     | 0.1592641  | 0.2182615 |
| A1BG       | -0.1049522 | 0.2186304 |
| TBXAS1     | 0.1067066  | 0.2187475 |
| CXCL8      | -0.4552325 | 0.2189007 |
| FAM110A    | -0.0904462 | 0.21951   |
| ANKRD17    | 0.1820875  | 0.2211901 |
| NAF1       | -0.0183002 | 0.2215713 |
| SLC39A7    | -0.0046638 | 0.2218234 |
| CCNK       | -0.1438405 | 0.2222583 |
| HNRNPA2B'  | 0.1611709  | 0.2235064 |
| LAPTM4A    | -0.1111511 | 0.2258914 |
| ZC3HAV1L   | 0.0623672  | 0.2259386 |
| MRFAP1     | -0.1045891 | 0.2265683 |
| PCBD2      | 0.100446   | 0.2280105 |
| AC058791.1 | -0.1132732 | 0.2289109 |
| PMS2       | 0.0886541  | 0.2295639 |
| EXOC3      | 0.0482452  | 0.2310908 |
| AC243960.1 | 0.0899632  | 0.2311592 |

|            |            |           |
|------------|------------|-----------|
| ITGB7      | -0.1061614 | 0.2319315 |
| MAK16      | 0.0630497  | 0.234779  |
| DNTTIP2    | 0.038532   | 0.2351885 |
| ASXL1      | 0.1224602  | 0.2365506 |
| AC242426.2 | 0.0512266  | 0.2367939 |
| CCNT2      | -0.1175572 | 0.2370932 |
| AC010883.3 | 0.0354971  | 0.2374717 |
| PEMT       | 0.0885164  | 0.2382902 |
| LATS1      | 0.0134289  | 0.2390343 |
| YTHDC2     | -0.0289052 | 0.2394095 |
| ZNF652     | 0.1161224  | 0.2394851 |
| RUVBL2     | 0.1109175  | 0.2408581 |
| PRKAR2A    | -0.097228  | 0.2434474 |
| ERCC4      | 0.0933692  | 0.243808  |
| ZFAND1     | 0.1433707  | 0.2440451 |
| AP006621.3 | 0.0697856  | 0.2441532 |
| SNAPC4     | 0.0464121  | 0.2444796 |
| MRPL57     | -0.1991187 | 0.2461303 |
| STYXL1     | 0.0844435  | 0.2463175 |
| TBC1D10A   | -0.0643832 | 0.2464458 |
| MRPL42     | 0.1208774  | 0.2468882 |
| KDM3B      | 0.0475925  | 0.2470793 |
| YIF1A      | -0.0140582 | 0.2474509 |
| MVB12B     | 0.0150496  | 0.2475267 |
| RANGRF     | 0.1149538  | 0.2477729 |
| PKD1       | 0.0439695  | 0.2483722 |
| CXorf40A   | -0.0617191 | 0.2486106 |
| DNAJC11    | 0.0724266  | 0.2489824 |
| STPG1      | -0.0570936 | 0.2510271 |
| RCN2       | 0.1671093  | 0.2510404 |
| CATSPER2   | 0.0651799  | 0.2516504 |
| TLK2       | -0.0872393 | 0.2520332 |
| ZFAND2B    | 0.0657865  | 0.2529647 |
| POLG       | -0.0304363 | 0.2529687 |
| ZNF587B    | 0.0778069  | 0.2535189 |
| AC019080.1 | 0.0556896  | 0.25402   |
| LRRC57     | -0.118807  | 0.2546705 |
| DNAJC1     | -0.1146048 | 0.2558191 |
| COPS8      | -0.1044262 | 0.2559593 |
| TBL2       | -0.0915872 | 0.2606571 |
| TOLLIP     | -0.1202261 | 0.2607761 |
| BX284668.5 | 0.0494344  | 0.2614638 |
| NAXE       | 0.1215364  | 0.2614721 |
| KANSL2     | 0.0315251  | 0.2667162 |
| TFIP11     | -0.1236853 | 0.266949  |
| GPI        | 0.1137548  | 0.2674218 |
| AC107214.1 | 0.0435023  | 0.2679033 |
| HINT2      | 0.0651229  | 0.2692139 |
| LRRC23     | 0.0707666  | 0.2709716 |
| TEX22      | 0.0475271  | 0.271507  |

|            |            |           |
|------------|------------|-----------|
| NRM        | -0.087391  | 0.2720417 |
| NDEL1      | -0.1315176 | 0.2723664 |
| PSMB6      | -0.0617453 | 0.2736161 |
| MACO1      | -0.0596552 | 0.2743431 |
| ERGIC2     | 0.0609701  | 0.2753784 |
| ATMIN      | 0.0093246  | 0.2755417 |
| ETFRF1     | -0.175236  | 0.2765517 |
| GCDH       | 0.065262   | 0.2766847 |
| PPP6R2     | 0.1001991  | 0.2772173 |
| CEP83      | 0.0866314  | 0.2783413 |
| NCAPD2     | 0.0815198  | 0.2788834 |
| EIF4E3     | 0.0721368  | 0.2795692 |
| ANKAR      | 0.0542707  | 0.2803084 |
| ZNF91      | 0.1487731  | 0.2803869 |
| C6orf62    | -0.0263598 | 0.2807503 |
| HEATR1     | 0.1156765  | 0.2809888 |
| H2AFX      | -0.1221674 | 0.2826995 |
| PRPF4      | -0.0442119 | 0.2836742 |
| SUZ12      | 0.1221056  | 0.2851645 |
| MRM2       | 0.0590852  | 0.285791  |
| CREB3L4    | 0.1092271  | 0.285796  |
| TMEM208    | -0.142152  | 0.2864504 |
| ZNF43      | 0.1729868  | 0.287653  |
| ARL2BP     | -0.1179661 | 0.2878672 |
| NT5DC3     | -0.1476279 | 0.2919741 |
| WT1-AS     | 0.0698878  | 0.2946706 |
| MAEA       | -0.0620937 | 0.2959275 |
| GIMAP2     | 0.0558114  | 0.2961529 |
| ETFDH      | 0.0104286  | 0.2964452 |
| MTMR14     | -0.0592592 | 0.2970384 |
| CTBP1-DT   | 0.0753628  | 0.2972833 |
| TIPIN      | 0.0759982  | 0.2979051 |
| P2RX1      | -0.0874353 | 0.2990417 |
| TAF3       | 0.1275452  | 0.3000867 |
| NRIP1      | 0.1028461  | 0.3002269 |
| YIPF5      | -0.0994181 | 0.3008052 |
| AASDHPPT   | 0.0066068  | 0.303097  |
| NLRP2      | 0.0777499  | 0.3049297 |
| RAB5IF     | 0.1305538  | 0.3051753 |
| EPM2A      | 0.0554962  | 0.3052325 |
| RPUSD1     | 0.0821322  | 0.3098271 |
| AC007383.2 | 0.0328773  | 0.3110663 |
| DNASE2     | 0.0953146  | 0.3126186 |
| MDH1       | 0.1446882  | 0.3129932 |
| NAA40      | 0.0176313  | 0.3132526 |
| FAM53C     | 0.0406758  | 0.314421  |
| TMEM68     | 0.0770162  | 0.3149503 |
| GNL2       | 0.04827    | 0.3165112 |
| RBM34      | -0.0086665 | 0.3166642 |
| SOD1       | -0.0757759 | 0.3167794 |



|            |            |           |
|------------|------------|-----------|
| PARG       | 0.0678147  | 0.3168102 |
| TCHP       | 0.1250404  | 0.3168499 |
| MSANTD4    | 0.0984074  | 0.3184492 |
| TRGC2      | 0.1265634  | 0.3187079 |
| LAMTOR3    | -0.1529025 | 0.319273  |
| ZNF354C    | 0.0544252  | 0.3212558 |
| BCAS3      | 0.0513948  | 0.3214734 |
| FLNA       | -0.2269351 | 0.3214934 |
| RILP       | 0.0688751  | 0.3223564 |
| TCTA       | -0.1115139 | 0.3244723 |
| CYB5B      | -0.0756463 | 0.325423  |
| ZNF787     | -0.0368354 | 0.3262071 |
| GMDS-DT    | 0.0997595  | 0.3264242 |
| PRMT6      | 0.02508    | 0.3268282 |
| NUSAP1     | 0.0939892  | 0.3274235 |
| KIF11      | 0.0826371  | 0.3274504 |
| GLRX3      | 0.0804827  | 0.3277223 |
| AL354740.1 | 0.0458323  | 0.3288485 |
| NSD3       | 0.1139856  | 0.3293823 |
| MED27      | -0.0573744 | 0.3304101 |
| TBC1D15    | 0.0409133  | 0.3317997 |
| RPAP1      | 0.0479408  | 0.333815  |
| LHFPL2     | -0.0824995 | 0.3346567 |
| GANC       | 0.0488435  | 0.336507  |
| ARHGAP17   | 0.0141211  | 0.3391197 |
| CCDC97     | -0.1420036 | 0.3391866 |
| HBS1L      | 0.0291124  | 0.3398407 |
| ECD        | -0.1036521 | 0.3398785 |
| ZBTB39     | 0.0261038  | 0.3429399 |
| ARMH1      | -0.1191851 | 0.3443168 |
| ACYP1      | 0.0293564  | 0.3457975 |
| GBF1       | -0.0068568 | 0.3458112 |
| TSPAN4     | 0.0490741  | 0.3465704 |
| STOML2     | 0.1191913  | 0.3480008 |
| ZMAT5      | 0.0759486  | 0.3494107 |
| MOCS2      | 0.0733662  | 0.3513155 |
| SDF2       | -0.0757247 | 0.3526887 |
| EML3       | 0.047821   | 0.3552505 |
| PIGU       | 0.0508123  | 0.3552832 |
| KATNBL1    | 0.1970972  | 0.3555898 |
| EIF4A3     | 0.0359185  | 0.3558087 |
| PEX5       | 0.033369   | 0.3575051 |
| TK2        | 0.0392619  | 0.358954  |
| AGFG1      | 0.0369898  | 0.3599533 |
| RNF2       | -0.1422328 | 0.3612349 |
| AGK        | 0.079036   | 0.3644037 |
| SERGEF     | 0.0707775  | 0.365783  |
| TSPYL1     | -0.1300555 | 0.3660392 |
| SLC27A1    | 0.0255445  | 0.3676196 |
| BAG4       | -0.1037825 | 0.3678886 |

|            |            |           |
|------------|------------|-----------|
| ISCA1      | -0.0556808 | 0.368297  |
| PRKAG2     | 0.1140109  | 0.3699545 |
| SHMT2      | 0.0618627  | 0.3714347 |
| ZFC3H1     | 0.1120025  | 0.3732309 |
| TIMM8A     | 0.0808522  | 0.3745706 |
| PFDN2      | 0.0024008  | 0.3806542 |
| DBF4       | 0.0869673  | 0.3808658 |
| MRPL17     | 0.1022669  | 0.3810062 |
| CIC        | -0.0904884 | 0.3815939 |
| PDCD2L     | 0.0600491  | 0.3818538 |
| RNF220     | 0.1070685  | 0.3829932 |
| AL157834.1 | 0.055183   | 0.3832418 |
| MIR646HG   | 0.0320414  | 0.3847449 |
| CD36       | 0.3844339  | 0.3848449 |
| IDH3A      | 0.0824518  | 0.3850024 |
| FGL2       | 0.0557239  | 0.3853619 |
| SNRNP40    | 0.1362152  | 0.387754  |
| METTLL23   | 0.034629   | 0.3877695 |
| RPS2       | 0.1010399  | 0.387991  |
| SNHG25     | 0.0646073  | 0.3906118 |
| WDR5B      | 0.0838906  | 0.3915398 |
| ATG13      | -0.0925571 | 0.3918076 |
| GNPTG      | 0.084376   | 0.39186   |
| OTUD1      | 0.025942   | 0.3931689 |
| HK2        | 0.0555793  | 0.3932283 |
| NDUFA13    | -0.1782889 | 0.3932749 |
| CLN8       | -0.1007715 | 0.3954653 |
| TPT1       | 0.1072211  | 0.3980593 |
| AVL9       | -0.1105495 | 0.3983509 |
| AC008915.2 | 0.0437733  | 0.3984045 |
| ELK1       | -0.0333705 | 0.3987194 |
| NIPAL2     | 0.1084243  | 0.400006  |
| PINLYP     | 0.0366074  | 0.4015879 |
| PPM1G      | 0.0756795  | 0.4025855 |
| TRIM27     | 0.1243535  | 0.4040669 |
| LRSAM1     | 0.0402926  | 0.4044893 |
| ASXL2      | 0.0784057  | 0.4075778 |
| SDHAF1     | 0.1020763  | 0.4077292 |
| ZNF529-AS1 | 0.0579122  | 0.4078528 |
| ALDH6A1    | 0.0962039  | 0.4082646 |
| PPP1R3B    | -0.0732832 | 0.40857   |
| ILKAP      | -0.0562333 | 0.409844  |
| RNF103     | -0.1068276 | 0.410867  |
| ATP11B     | -0.1454109 | 0.4112462 |
| FNDC3A     | 0.0626935  | 0.413675  |
| MAP2K2     | 0.0943415  | 0.413728  |
| AC159540.2 | 0.1002507  | 0.4142335 |
| MIR17HG    | 0.0422201  | 0.4177332 |
| CSNK2A1    | -0.1067783 | 0.4187936 |
| CLCC1      | 0.0640306  | 0.419685  |

|           |            |           |
|-----------|------------|-----------|
| RBMS1     | -0.1662916 | 0.4225062 |
| AKAP17A   | -0.0747945 | 0.4225182 |
| TMEM164   | 0.0317524  | 0.4233415 |
| FAM131A   | -0.1000336 | 0.4242769 |
| MILR1     | -0.0967625 | 0.424865  |
| MHENCN    | -0.1186929 | 0.4288196 |
| GRSF1     | 0.1456418  | 0.4293741 |
| MCCC2     | 0.1131924  | 0.4296665 |
| SMAD4     | -0.0999186 | 0.4336034 |
| ERVK13-1  | 0.0303566  | 0.4340391 |
| TCEA2     | -0.1381986 | 0.4344526 |
| LINC00539 | 0.0420325  | 0.434798  |
| RAVER2    | 0.0810141  | 0.4370292 |
| ZCWPW1    | 0.0666563  | 0.440079  |
| PPP1CC    | 0.0181395  | 0.4407759 |
| TMEM115   | -0.1041584 | 0.4408294 |
| LGALS3BP  | -0.1221223 | 0.4420487 |
| VPS28     | 0.0496846  | 0.4420583 |
| TMEM109   | 0.0778295  | 0.4439112 |
| IRF2BP1   | -0.0161836 | 0.444154  |
| ARID2     | -0.0730601 | 0.4447091 |
| MPND      | 0.0709295  | 0.4457418 |
| ALDH9A1   | 0.0339506  | 0.4467644 |
| GFM1      | 0.0451756  | 0.4475896 |
| CTDSPL2   | -0.0764543 | 0.4500616 |
| ANKRD40   | -0.0567864 | 0.4509133 |
| VENTX     | 0.0040585  | 0.4542441 |
| SPICE1    | 0.0645347  | 0.4555616 |
| DPP8      | -0.0831538 | 0.4562091 |
| VPS33A    | 0.0004681  | 0.4586215 |
| DNAJB4    | 0.0868199  | 0.4589294 |
| NPHP3     | -0.0129001 | 0.4592703 |
| SEC13     | -0.0486568 | 0.4601623 |
| SMCR5     | -0.1351113 | 0.4626862 |
| ZCCHC10   | -0.0891595 | 0.4643944 |
| ISOC1     | 0.041658   | 0.4685854 |
| IRF5      | 0.0716113  | 0.4691835 |
| UBAC2     | 0.0738667  | 0.4696899 |
| DLG1      | 0.089182   | 0.4704653 |
| TUBA1C    | -0.1673348 | 0.4710748 |
| HMGXB4    | -0.0728415 | 0.4713859 |
| REEP5     | 0.0522457  | 0.4745162 |
| TMEM134   | 0.0491655  | 0.475092  |
| NECAB3    | 0.0291743  | 0.4764544 |
| TMEM267   | 0.0440189  | 0.4772802 |
| DDI2      | -0.082459  | 0.4775175 |
| NRAV      | -0.0458165 | 0.4779117 |
| CWF19L2   | 0.1122732  | 0.478035  |
| PDE6B     | 0.0694521  | 0.4782516 |
| TCEAL9    | 0.1071041  | 0.4784414 |

|            |            |           |
|------------|------------|-----------|
| AC138649.1 | 0.0298489  | 0.4786128 |
| TMEM9      | 0.0558402  | 0.481766  |
| C8orf76    | -0.1040771 | 0.48187   |
| TMEM30A    | 0.0341098  | 0.4824181 |
| NFE2       | 0.0275672  | 0.4859466 |
| PTPN12     | -0.0775888 | 0.4864527 |
| TIMM17B    | 0.0008802  | 0.4877946 |
| ARID5B     | 0.0692937  | 0.488676  |
| NUDT14     | 0.0729581  | 0.4918937 |
| AC008105.3 | -0.1076989 | 0.4946344 |
| PEX26      | 0.0756233  | 0.4968271 |
| TMEM9B-AS  | 0.0754006  | 0.4989619 |
| PHETA1     | -0.0613722 | 0.5016792 |
| RASSF3     | -0.0532422 | 0.5021963 |
| EIF2S1     | -0.1180348 | 0.5035812 |
| NPRL3      | 0.0728513  | 0.5051689 |
| MEN1       | 0.0420408  | 0.5062575 |
| NCOA1      | 0.0670772  | 0.5069952 |
| STN1       | 0.121445   | 0.5073642 |
| BORCS7     | 0.039094   | 0.5085818 |
| CROT       | 0.0689842  | 0.508971  |
| PIGC       | 0.0986606  | 0.5095348 |
| PHF2       | 0.0524787  | 0.5125666 |
| NDUFS3     | 0.1588965  | 0.5142844 |
| BOP1       | 0.053041   | 0.5145044 |
| INPP1      | -0.096598  | 0.5153808 |
| UBE2D4     | 0.0813814  | 0.5179928 |
| BORA       | 0.0502299  | 0.5231276 |
| GSDMD      | 0.0975383  | 0.5250537 |
| TADA2A     | 0.0761529  | 0.5286398 |
| CTSZ       | -0.1026405 | 0.5292411 |
| SMAD2      | -0.1183593 | 0.5326004 |
| CTNBL1     | 0.1135622  | 0.5328942 |
| PSMB3      | -0.1419861 | 0.5338369 |
| SORT1      | 0.094254   | 0.5339647 |
| SQLE       | -0.2272622 | 0.5350202 |
| PIK3C3     | 0.1308014  | 0.5351368 |
| RCOR1      | -0.0011584 | 0.535911  |
| WDR92      | 0.0713799  | 0.5398753 |
| LINC02175  | 0.0531237  | 0.5418327 |
| CDKN2AIP   | 0.0899422  | 0.5432285 |
| LINC01355  | 0.0639269  | 0.5444653 |
| AC022973.5 | 0.0695502  | 0.5454799 |
| UHRF1BP1L  | -0.0599709 | 0.5475182 |
| POLR2E     | -0.1199764 | 0.5483363 |
| ARHGAP10   | 0.0527069  | 0.55188   |
| CUL3       | -0.1586371 | 0.5526204 |
| SUPT20H    | 0.0857183  | 0.55502   |
| USP42      | -0.0411545 | 0.5553416 |
| MAP3K11    | -0.1523117 | 0.5553654 |

|            |            |           |
|------------|------------|-----------|
| ASB16-AS1  | 0.0607494  | 0.5570647 |
| DAXX       | -0.0523814 | 0.5580961 |
| PLRG1      | 0.1165893  | 0.5594405 |
| ZNF561-AS1 | 0.0749148  | 0.5595687 |
| PPP1R12B   | 0.0645958  | 0.5620746 |
| PLEKHJ1    | -0.1103781 | 0.5628358 |
| AL162458.1 | 0.0241408  | 0.563277  |
| NRROS      | 0.0661259  | 0.5647521 |
| ZSCAN26    | 0.0761026  | 0.5648689 |
| LMF2       | -0.1354524 | 0.5718604 |
| PPP2R3C    | 0.0532192  | 0.572842  |
| GTF3A      | 0.224015   | 0.5749454 |
| MTMR4      | 0.0621463  | 0.5761873 |
| HECA       | -0.1608698 | 0.578996  |
| PCBD1      | 0.1359585  | 0.5801332 |
| CPSF6      | -0.0837687 | 0.584006  |
| CASP4      | 0.1678335  | 0.5840864 |
| MSTO1      | 0.0209814  | 0.5846553 |
| LONP1      | 0.053314   | 0.5849297 |
| PICALM     | -0.1455438 | 0.5849365 |
| RFXANK     | 0.1217034  | 0.5854448 |
| ZNF616     | 0.0530878  | 0.5859898 |
| ATF7       | -0.115315  | 0.5862688 |
| CKMT2-AS1  | 0.068706   | 0.5874747 |
| AC036176.1 | 0.0514061  | 0.5883884 |
| NOL6       | 0.0381215  | 0.5899509 |
| ZNF24      | -0.0450044 | 0.5904471 |
| TIAL1      | 0.1930352  | 0.5914831 |
| KIF23      | 0.0404968  | 0.5917082 |
| MOCS3      | 0.0081439  | 0.5936376 |
| SPEN       | -0.1093925 | 0.594882  |
| LINC01410  | 0.0712535  | 0.595691  |
| BCAS2      | -0.1308745 | 0.5968269 |
| ALG9       | 0.0238931  | 0.5976647 |
| PSMB4      | -0.0769215 | 0.5981998 |
| RAB9A      | -0.0869145 | 0.6005632 |
| CENPQ      | 0.0621655  | 0.6021371 |
| HSPA1B     | -0.0250207 | 0.6021987 |
| LRRC59     | -0.1147777 | 0.6027227 |
| C5orf56    | -0.0950445 | 0.6027619 |
| RPP25      | 0.0509964  | 0.604224  |
| ETV5       | -0.0807121 | 0.6057062 |
| CHAMP1     | -0.1066103 | 0.6061342 |
| DAGLB      | -0.0868532 | 0.6072419 |
| IPO5       | 0.1292505  | 0.6078023 |
| CPOX       | 0.0611547  | 0.6079559 |
| CDC16      | 0.0565901  | 0.6081714 |
| ACBD4      | 0.0516232  | 0.6085989 |
| ST3GAL1    | -0.1820389 | 0.6119501 |
| IFT20      | -0.0798413 | 0.6143574 |

|          |            |           |
|----------|------------|-----------|
| GPR135   | 0.0642256  | 0.6186756 |
| SERAC1   | -0.0453963 | 0.6191536 |
| KLHL9    | -0.0733923 | 0.6197326 |
| RAD18    | 0.0539902  | 0.6219088 |
| WIPF1    | 0.0841019  | 0.6219201 |
| ZBTB37   | 0.1417547  | 0.621964  |
| FPGT     | 0.0535848  | 0.6238207 |
| HAUS3    | 0.0488148  | 0.6271445 |
| ATP11A   | 0.059862   | 0.6289983 |
| RELA-DT  | 0.0443473  | 0.6352122 |
| TMED8    | 0.0949733  | 0.6368977 |
| FRMD8    | -0.0354406 | 0.6376012 |
| ARMC5    | 0.061446   | 0.6394981 |
| ACAP3    | -0.1150118 | 0.6420117 |
| GATB     | 0.070138   | 0.645021  |
| C17orf58 | 0.0346225  | 0.6558056 |
| ZDHHC5   | -0.06338   | 0.6558109 |
| DPAGT1   | 0.0711339  | 0.6558849 |
| MBNL3    | 0.0729133  | 0.657309  |
| ATRAID   | 0.0735873  | 0.660244  |
| NAA50    | -0.1134721 | 0.6609807 |
| RRNAD1   | 0.0516395  | 0.6613518 |
| CFAP44   | 0.0768561  | 0.6615375 |
| ZNF410   | -0.157942  | 0.6629604 |
| TRIM59   | 0.155838   | 0.6654552 |
| ZNF800   | -0.1217925 | 0.6656337 |
| NUDT22   | 0.0668671  | 0.667408  |
| APPL2    | 0.0421899  | 0.6675918 |
| NPEPL1   | 0.0135969  | 0.6691903 |
| STIMATE  | -0.0590763 | 0.6709296 |
| FAM43A   | -0.0703164 | 0.6719459 |
| P4HTM    | 0.0087771  | 0.6736303 |
| SARS     | 0.132802   | 0.6748717 |
| UBAP2L   | 0.0678652  | 0.6752791 |
| METTLL1  | 0.0687472  | 0.6794673 |
| ING4     | 0.093336   | 0.6867603 |
| TBCB     | -0.1859074 | 0.6875147 |
| DTD1     | 0.0884727  | 0.6957539 |
| CCDC171  | 0.0572467  | 0.6963054 |
| GMEB1    | -0.1252881 | 0.6971501 |
| NUB1     | 0.0483167  | 0.698673  |
| LTBP4    | 0.0726007  | 0.6988403 |
| SLC35G2  | -0.0571474 | 0.6995026 |
| SLA2     | -0.0174044 | 0.7005021 |
| SLAIN2   | -0.0368236 | 0.7014708 |
| ZNF227   | 0.0393952  | 0.7039299 |
| TRMT61B  | 0.0847329  | 0.7054666 |
| FAM126A  | -0.005402  | 0.7074353 |
| TFPT     | 0.1047333  | 0.7102516 |
| MRPL27   | -0.0217389 | 0.7119142 |

|            |            |           |
|------------|------------|-----------|
| VPS9D1     | -0.0588064 | 0.7156996 |
| RNF217     | 0.0651923  | 0.7178254 |
| ZNF829     | 0.0435131  | 0.719732  |
| TMEM18     | 0.1271996  | 0.7225513 |
| TFCP2      | 0.0809589  | 0.7229289 |
| NEU3       | 0.0363655  | 0.7266588 |
| PRPSAP2    | 0.0566888  | 0.728326  |
| USP11      | 0.0601262  | 0.7306753 |
| SOCS4      | 0.1527463  | 0.7352372 |
| KPNA3      | -0.13447   | 0.7361517 |
| RWDD1      | 0.0801488  | 0.7378251 |
| DDHD2      | -0.0028054 | 0.7380386 |
| MPZL1      | 0.0810768  | 0.7383147 |
| NNT        | 0.1153453  | 0.7393329 |
| XPA        | 0.1147565  | 0.7397125 |
| VHL        | -0.0365073 | 0.742041  |
| BCAT1      | 0.073304   | 0.7444084 |
| ABHD10     | 0.0699661  | 0.7473185 |
| STK32C     | 0.0827446  | 0.7474919 |
| TMED1      | -0.031388  | 0.7480422 |
| ERI3       | 0.0798533  | 0.7547001 |
| YEATS4     | 0.0601274  | 0.7561469 |
| CHD9       | 0.0614101  | 0.7590159 |
| FXN        | 0.0947669  | 0.7590347 |
| MLST8      | 0.075728   | 0.7610689 |
| RNF5       | 0.0831121  | 0.7611612 |
| CARM1      | 0.0467164  | 0.7621541 |
| MAP3K14    | -0.0594776 | 0.7622589 |
| Z93241.1   | 0.0245678  | 0.7712732 |
| COQ6       | 0.0105128  | 0.7716673 |
| ZNF213-AS1 | 0.0626773  | 0.7744928 |
| SELENON    | 0.0545105  | 0.7744966 |
| IKZF5      | -0.1025709 | 0.7760502 |
| BLCAP      | -0.1048525 | 0.7808095 |
| C1orf216   | -0.0563848 | 0.7868021 |
| SEC22B     | 0.1227805  | 0.7879356 |
| CTDP1      | -0.0853458 | 0.7933085 |
| TAF11      | -0.0700513 | 0.7952706 |
| USP36      | -0.0478581 | 0.7956367 |
| CTSO       | 0.0431821  | 0.7991921 |
| PIK3AP1    | 0.1157982  | 0.8019443 |
| IK         | 0.0061405  | 0.8027964 |
| CCDC26     | 0.0744439  | 0.8061808 |
| HBEGF      | 0.0735547  | 0.8079278 |
| LY6G5C     | 0.0494508  | 0.8130672 |
| GOLGA2     | 0.0226683  | 0.8134501 |
| GSK3B      | 0.1028649  | 0.814667  |
| STXBP2     | -0.1119176 | 0.8166061 |
| PEX1       | 0.0643428  | 0.8188837 |
| TRMT2A     | 0.0663565  | 0.8191448 |

|            |            |           |
|------------|------------|-----------|
| GLYCTK     | -0.0706486 | 0.8224657 |
| RASGRP4    | -0.0636727 | 0.8246069 |
| DHX30      | -0.0186202 | 0.8251697 |
| ILF3       | 0.0691633  | 0.8258446 |
| POLR3G     | 0.0757521  | 0.8305907 |
| FO393401.1 | 0.0682971  | 0.8323961 |
| HNRNPD     | 0.161325   | 0.8326237 |
| KBTBD3     | 0.0619306  | 0.838244  |
| ORAI3      | 0.0031736  | 0.8383802 |
| AC005261.1 | 0.0713265  | 0.8402296 |
| STAM       | 0.0247114  | 0.8411562 |
| MEF2A      | -0.1503369 | 0.8434716 |
| PCED1A     | -0.0306538 | 0.8444013 |
| KIAA1958   | 0.0741965  | 0.8462421 |
| SEC31B     | 0.0274649  | 0.8463965 |
| MCM8       | 0.0602541  | 0.8546137 |
| PGPEP1     | -0.0659179 | 0.8564241 |
| TMCO3      | -0.1020941 | 0.8624401 |
| AP3S2      | -0.0731488 | 0.8645886 |
| KAT8       | 0.0537022  | 0.8675685 |
| ZUP1       | -0.0995332 | 0.8744109 |
| TMEM69     | 0.0772464  | 0.8750156 |
| U2AF2      | 0.0693327  | 0.8758075 |
| TYW5       | -0.0283691 | 0.8766339 |
| AGPAT3     | 0.0482151  | 0.8771243 |
| GBA2       | -0.0985512 | 0.8833381 |
| USP10      | 0.0378639  | 0.8850621 |
| RPGRIP1L   | 0.0498628  | 0.8879897 |
| PRKAB2     | -0.0372937 | 0.8939461 |
| DIRAS3     | 0.0464328  | 0.8960032 |
| EIF2AK4    | 0.1644119  | 0.8984994 |
| CASP10     | -0.1104109 | 0.9017461 |
| UBE2K      | -0.0737842 | 0.904476  |
| DGUOK      | -0.0378551 | 0.9063582 |
| ANKRD54    | -0.0057    | 0.907292  |
| C20orf194  | -0.0991735 | 0.9096249 |
| ATAD1      | -0.0362681 | 0.9142175 |
| GNAI1      | 0.1404229  | 0.9148005 |
| BABAM1     | -0.0090054 | 0.9157222 |
| UBALD1     | -0.0856899 | 0.9180402 |
| TTLL10     | -0.0680709 | 0.9197084 |
| CPT2       | 0.035755   | 0.924803  |
| ZNF775     | -0.1031816 | 0.9255627 |
| DBNL       | -0.138748  | 0.9292052 |
| ACSL4      | 0.1332725  | 0.9323345 |
| DAZAP1     | -0.1505003 | 0.9356874 |
| LDLRAD4    | -0.2015231 | 0.9360283 |
| ZBTB1      | 0.0968009  | 0.939417  |
| PRICKLE1   | 0.0247112  | 0.9460863 |
| TRPT1      | 0.0695619  | 0.9476106 |



|            |            |           |
|------------|------------|-----------|
| TUBGCP3    | 0.0792495  | 0.9528169 |
| VPS11      | 0.0593842  | 0.9544686 |
| C11orf98   | 0.0504949  | 0.9564243 |
| POLRMT     | 0.0227749  | 0.9575601 |
| TVP23B     | 0.035565   | 0.9590395 |
| ZNF169     | 0.0591649  | 0.9590829 |
| DHRS4L2    | 0.0763213  | 0.9607848 |
| TBXA2R     | -0.073872  | 0.9619455 |
| SCLT1      | 0.0698542  | 0.9643488 |
| HINFP      | -0.0426839 | 0.9651401 |
| CCT6B      | 0.0412673  | 0.9666618 |
| ATXN3      | 0.0273287  | 0.9675424 |
| ACYP2      | 0.0639876  | 0.969201  |
| CDK5RAP2   | -0.0582739 | 0.9779125 |
| ZBED1      | 0.0620768  | 0.9819054 |
| COX10      | 0.0225892  | 0.9837633 |
| RHOBTB2    | 0.0220638  | 0.9868686 |
| ZNF639     | 0.0816699  | 0.9875508 |
| PLGLB2     | 0.070606   | 0.9880353 |
| PUF60      | -0.1481899 | 0.9888272 |
| PSMA3      | -0.1703463 | 0.9892656 |
| LEPROT     | 0.0998383  | 0.9906566 |
| GK5        | 0.0728285  | 0.9930354 |
| AC020915.2 | 0.0418212  | 0.9939143 |
| ZNF580     | 0.0500119  | 0.9968111 |
| RPS6KC1    | 0.0519551  | 0.9969468 |
| TSR2       | -0.0862195 | 0.9969931 |
| DHFR       | 0.0631918  | 1         |
| YKT6       | -0.0759744 | 1         |
| TET2       | -0.1520795 | 1         |
| SOCS5      | 0.0390157  | 1         |
| LRRC8D     | -0.0110663 | 1         |
| YIPF3      | -0.1360898 | 1         |
| SNRPD3     | 0.0902117  | 1         |
| DNMBP      | -0.1039648 | 1         |
| JPT1       | -0.1367921 | 1         |
| BCL10      | -0.0962011 | 1         |
| TOPBP1     | 0.1498736  | 1         |
| MAP4       | -0.1200348 | 1         |
| PLD1       | 0.0415009  | 1         |
| RALGPS2    | 0.0373568  | 1         |
| SPRYD3     | -0.0363426 | 1         |
| ELP6       | 0.0922382  | 1         |
| PLOD1      | 0.0481412  | 1         |
| PLAA       | -0.0954866 | 1         |
| APOOL      | 0.1066179  | 1         |
| EMG1       | -0.0408548 | 1         |
| CHM        | 0.1101165  | 1         |
| STAC3      | 0.0784774  | 1         |
| ZDHHC12    | 0.0160271  | 1         |

|            |            |   |
|------------|------------|---|
| NME6       | 0.0393429  | 1 |
| SCRIB      | 0.0169143  | 1 |
| ZNF318     | 0.0441174  | 1 |
| VDAC2      | 0.1205011  | 1 |
| DHX57      | 0.0463734  | 1 |
| FN3KRP     | 0.0411909  | 1 |
| LSM3       | 0.0184218  | 1 |
| AC004865.2 | 0.0544262  | 1 |
| ZNF660     | 0.0891968  | 1 |
| TPSB2      | 0.0419243  | 1 |
| POLR2J     | 0.1068684  | 1 |
| SIK2       | -0.0150373 | 1 |
| BID        | -0.1556592 | 1 |
| LTBP3      | -0.1480559 | 1 |
| LINC00174  | 0.0623359  | 1 |
| AC147651.4 | -0.089534  | 1 |
| ADAM10     | 0.1288215  | 1 |
| RLF        | -0.047791  | 1 |
| NIT1       | 0.0514829  | 1 |
| AC099518.5 | -0.00639   | 1 |
| UTRN       | 0.0755714  | 1 |
| LINC00863  | 0.0138607  | 1 |
| CCDC18-AS  | 0.1699334  | 1 |
| GSTZ1      | 0.0545897  | 1 |
| LARP1B     | 0.0723344  | 1 |
| NDUFA7     | 0.1105343  | 1 |
| PHIP       | -0.0745117 | 1 |
| SEPHS2     | 0.0289723  | 1 |
| MAU2       | -0.0048852 | 1 |
| NFKBIB     | -0.1433288 | 1 |
| FLYWCH1    | 0.0467339  | 1 |
| MIR762HG   | 0.0345485  | 1 |
| ANXA7      | -0.1529975 | 1 |
| BANK1      | 0.0499295  | 1 |
| TRIOBP     | -0.1028546 | 1 |
| AL391832.2 | 0.015274   | 1 |
| P2RX4      | 0.0188135  | 1 |
| ZNF525     | 0.0657829  | 1 |
| EDC3       | -0.0544818 | 1 |
| ZHX1       | 0.0811815  | 1 |
| CCDC102A   | -0.012261  | 1 |
| AC009318.1 | 0.1930561  | 1 |
| PPP2CB     | -0.1122752 | 1 |
| PCYT2      | 0.0547271  | 1 |
| LRRC75A    | 0.0999431  | 1 |
| SPTY2D10E  | 0.0315922  | 1 |
| CEBPA      | -0.0459294 | 1 |
| GRAMD1A    | -0.0684679 | 1 |
| AC127502.2 | -0.0673516 | 1 |
| MVB12A     | 0.0846987  | 1 |

|             |            |   |
|-------------|------------|---|
| NOP16       | 0.1660266  | 1 |
| COPS4       | -0.1394682 | 1 |
| ELMOD2      | 0.0647971  | 1 |
| AC006480.2  | 0.0318109  | 1 |
| SQOR        | -0.0290324 | 1 |
| SPNS1       | -0.0461079 | 1 |
| FAM120AOS   | -0.1036975 | 1 |
| ZNF433-AS1  | 0.1097475  | 1 |
| EIF3H       | -0.0951708 | 1 |
| MBD5        | 0.0262859  | 1 |
| MOGS        | 0.0337215  | 1 |
| MFSD8       | -0.0749168 | 1 |
| RNF167      | -0.0373987 | 1 |
| SNHG7       | -0.1268923 | 1 |
| SPATA33     | -0.0808655 | 1 |
| AMACR       | 0.039137   | 1 |
| MIIP        | 0.0522206  | 1 |
| FARS2       | 0.0267003  | 1 |
| POLR3A      | 0.0961899  | 1 |
| SLC39A9     | 0.0336911  | 1 |
| COPB2       | 0.0698582  | 1 |
| FBXW4       | -0.0234286 | 1 |
| CHD8        | -0.1391501 | 1 |
| VTI1A       | -0.100039  | 1 |
| MAP3K12     | 0.0435883  | 1 |
| SNHG21      | -0.0868036 | 1 |
| EVA1B       | -0.2455049 | 1 |
| FDFT1       | -0.126552  | 1 |
| STK3        | 0.0909594  | 1 |
| CNDP2       | -0.050803  | 1 |
| SSH1        | -0.1232091 | 1 |
| NAGLU       | 0.0036761  | 1 |
| CCNQ        | -0.0737623 | 1 |
| MCM3AP      | 0.0961601  | 1 |
| MRM3        | 0.0144833  | 1 |
| NUP85       | 0.0300585  | 1 |
| FBRSL1      | 0.0664613  | 1 |
| LRCH4       | -0.0626238 | 1 |
| CAMK2G      | 0.0893925  | 1 |
| EPDR1       | 0.0943057  | 1 |
| QRSL1       | 0.0679193  | 1 |
| ZNF329      | -0.0331439 | 1 |
| SHLD2       | -0.0411292 | 1 |
| TUBGCP2     | -0.0754825 | 1 |
| N4BP2L2-IT1 | 0.0456402  | 1 |
| PCSK7       | -0.0964834 | 1 |
| ZNF544      | 0.098853   | 1 |
| JADE2       | -0.0958324 | 1 |
| FAM104A     | -0.0388585 | 1 |
| SMIM15      | 0.0581229  | 1 |

|            |            |   |
|------------|------------|---|
| TEFM       | 0.0622398  | 1 |
| CNP        | 0.0573074  | 1 |
| SESN2      | -0.0756767 | 1 |
| ZBTB16     | 0.2086368  | 1 |
| KLHDC10    | -0.0999782 | 1 |
| CCDC62     | 0.0581988  | 1 |
| FNBP1      | -0.1176242 | 1 |
| MCM2       | 0.0478226  | 1 |
| TSHZ1      | 0.0434088  | 1 |
| ATF6B      | -0.0955874 | 1 |
| TCTEX1D2   | 0.0130895  | 1 |
| ZDHHC2     | 0.0739619  | 1 |
| DAP        | -0.0824152 | 1 |
| ZC3H10     | 0.0218034  | 1 |
| DALRD3     | -0.1325359 | 1 |
| NDUFA12    | -0.0535639 | 1 |
| MYO15B     | -0.107741  | 1 |
| ANKRD13A   | 0.0456661  | 1 |
| INPP5D     | 0.0794265  | 1 |
| CCNJ       | 0.0286052  | 1 |
| NOB1       | 0.1367494  | 1 |
| ATP5PB     | -0.1617007 | 1 |
| FAM135A    | 0.0685219  | 1 |
| MRPL18     | 0.0688683  | 1 |
| AL645728.1 | 0.0486497  | 1 |
| ENTPD3-AS  | 0.0463474  | 1 |
| AC008443.1 | -0.0053577 | 1 |
| POLR2I     | 0.1866575  | 1 |
| ATP2C1     | -0.0929945 | 1 |
| GCLC       | 0.0843618  | 1 |
| PKM        | -0.1144899 | 1 |
| SAE1       | 0.0179385  | 1 |
| RPS6KA3    | -0.1293362 | 1 |
| PSMB9      | 0.1142127  | 1 |
| LRIG2      | 0.0094249  | 1 |
| ROBO3      | -0.0873139 | 1 |
| VPS54      | 0.0349345  | 1 |
| EXOC7      | 0.0111482  | 1 |
| TAZ        | -0.092358  | 1 |
| WDSUB1     | 0.0633709  | 1 |
| ABHD17B    | 0.0853915  | 1 |
| OLIG1      | 0.0269911  | 1 |
| POGZ       | -0.1435061 | 1 |
| YTHDF3     | -0.0420544 | 1 |
| PGM1       | 0.0958259  | 1 |
| WWP1       | 0.0458528  | 1 |
| RAD21      | -0.119827  | 1 |
| DDX19A     | 0.0246216  | 1 |
| AC025171.1 | 0.1079249  | 1 |
| MED13      | -0.1204898 | 1 |

|          |            |   |
|----------|------------|---|
| RAB27A   | 0.0859559  | 1 |
| SAMD8    | -0.1201165 | 1 |
| C5orf15  | -0.0639574 | 1 |
| RAB8A    | 0.1261775  | 1 |
| WBP1     | -0.1156227 | 1 |
| BIRC2    | -0.1255371 | 1 |
| ERC1     | 0.0413154  | 1 |
| PRIMPOL  | 0.0900619  | 1 |
| TMEM126A | 0.0953738  | 1 |
| COMMD8   | 0.1050244  | 1 |
| GSAP     | 0.0715322  | 1 |
| RFX7     | 0.0736625  | 1 |
| RAD54L2  | 0.0405473  | 1 |
| PIK3R2   | 0.045447   | 1 |
| TIMM23   | -0.1190356 | 1 |
| CENPH    | 0.0604245  | 1 |
| SF3A3    | 0.1017318  | 1 |
| SLC30A7  | 0.0369511  | 1 |
| ZNF430   | -0.1201396 | 1 |
| ZNF566   | 0.0837632  | 1 |
| NPIP4    | 0.0417996  | 1 |
| FBXW8    | 0.0549519  | 1 |
| CC2D1B   | -0.0852924 | 1 |
| ANKRD39  | 0.0524913  | 1 |
| KSR1     | -0.1212051 | 1 |
| KIAA0930 | 0.0556511  | 1 |
| PLTP     | -0.0725241 | 1 |
| TSPAN31  | 0.0039112  | 1 |
| RNF6     | -0.0021348 | 1 |
| ZNF362   | 0.0372933  | 1 |
| SUCO     | -0.0455364 | 1 |
| TOR1A    | -0.0506031 | 1 |
| OSBPL11  | -0.0843535 | 1 |
| MTPN     | -0.1681363 | 1 |
| MRPL58   | 0.0438744  | 1 |
| SF3B6    | -0.0857915 | 1 |
| PEX13    | -0.1173011 | 1 |
| SMDT1    | 0.0034773  | 1 |
| DNASE1L1 | -0.0874583 | 1 |
| UTP6     | 0.1161619  | 1 |
| COA8     | 0.0512284  | 1 |
| LRRC42   | -0.1013674 | 1 |
| TAX1BP3  | 0.0660184  | 1 |
| RMND5A   | -0.0268652 | 1 |
| TMPRSS9  | 0.0510841  | 1 |
| MED24    | 0.0191642  | 1 |
| USP47    | -0.1772748 | 1 |
| FANCI    | 0.0555061  | 1 |
| HGH1     | 0.0457816  | 1 |
| COPS5    | 0.1049896  | 1 |

|             |            |   |
|-------------|------------|---|
| ABHD14B     | 0.0696389  | 1 |
| DNAJC2      | 0.0399041  | 1 |
| PDIA4       | 0.0672809  | 1 |
| SUN2        | -0.1105091 | 1 |
| TRMT11      | 0.0351142  | 1 |
| HSPA14.1    | 0.0265659  | 1 |
| EPS15       | 0.0672726  | 1 |
| ALG1        | 0.0530278  | 1 |
| AC142472.1  | 0.1004256  | 1 |
| NAT14       | -0.0640876 | 1 |
| PDE4D       | -0.0492746 | 1 |
| TENT4B      | -0.0026385 | 1 |
| PGRMC1      | -0.1093278 | 1 |
| BDNF-AS     | 0.0719765  | 1 |
| PARP14      | 0.1394536  | 1 |
| BTBD2       | 0.0661948  | 1 |
| NEMF        | 0.1133883  | 1 |
| ZNF568      | 0.0704743  | 1 |
| ZDHHC20     | -0.0183684 | 1 |
| FBXO6       | 0.0504149  | 1 |
| RGP1        | 0.00684    | 1 |
| SRRT        | 0.0869098  | 1 |
| PLBD2       | 0.0327094  | 1 |
| CHFR        | -0.0936832 | 1 |
| PNO1        | 0.0446523  | 1 |
| MFAP1       | -0.0571269 | 1 |
| TXNDC16     | 0.044807   | 1 |
| UQCRB       | 0.1044787  | 1 |
| RPL28       | -0.1043688 | 1 |
| AL133243.2  | -0.0808658 | 1 |
| PHB         | 0.1191835  | 1 |
| CHML        | 0.1289691  | 1 |
| STK39       | 0.0312666  | 1 |
| ZNF780A     | 0.0727728  | 1 |
| AMBRA1      | -0.077015  | 1 |
| SLC16A1-AS1 | 0.0524599  | 1 |
| ACAA1       | -0.0637178 | 1 |
| STK10       | -0.1252227 | 1 |
| TXNDC17     | -0.0421236 | 1 |
| SAFB        | 0.1056432  | 1 |
| NPIP5       | -0.0004054 | 1 |
| D2HGDH      | -0.056364  | 1 |
| RCE1        | -0.0954147 | 1 |
| SPTLC2      | -0.1515625 | 1 |
| PPFIA1      | 0.0532253  | 1 |
| PITHD1      | -0.10622   | 1 |
| AC139099.2  | -0.0293767 | 1 |
| GIMAP6      | -0.1170396 | 1 |
| PDK1        | 0.0687515  | 1 |
| RSPRY1      | -0.1106506 | 1 |

|            |            |   |
|------------|------------|---|
| SUCLA2     | 0.0504674  | 1 |
| CTCF       | -0.0199615 | 1 |
| NDUFB7     | 0.1326092  | 1 |
| COQ10A     | 0.0612131  | 1 |
| ANKRD18B   | 0.0400328  | 1 |
| C12orf57   | 0.1505717  | 1 |
| EPC2       | 0.0123993  | 1 |
| C1GALT1    | 0.0338806  | 1 |
| MFN1       | 0.0480422  | 1 |
| TUT4       | 0.0670336  | 1 |
| JRK        | 0.0801286  | 1 |
| PIWIL4     | 0.0431953  | 1 |
| PXMP4      | 0.0622469  | 1 |
| GATAD2A    | -0.0898891 | 1 |
| HIST2H2AC  | 0.0305176  | 1 |
| NDUFA9     | -0.0612815 | 1 |
| GIMAP1     | -0.0630915 | 1 |
| ZFP82      | 0.0474264  | 1 |
| AL162253.2 | 0.0317524  | 1 |
| ATAD3A     | 0.0585109  | 1 |
| ZNF394     | -0.0783019 | 1 |
| FLAD1      | 0.0288455  | 1 |
| PPBP       | 0.338302   | 1 |
| ARHGAP1    | 0.0047267  | 1 |
| RSKR       | 0.0549028  | 1 |
| CENPK      | 0.0572382  | 1 |
| ACD        | -0.0326476 | 1 |
| PLEKHB2    | -0.0938594 | 1 |
| AAMP       | 0.0404944  | 1 |
| CCDC51     | 0.0459723  | 1 |
| MX1        | 0.1146463  | 1 |
| TBC1D10B   | -0.150371  | 1 |
| PSMC2      | -0.0914187 | 1 |
| AC046134.2 | 0.0296979  | 1 |
| TXNDC11    | -0.0786456 | 1 |
| SCAPER     | 0.0583799  | 1 |
| NLRP3      | 0.0007834  | 1 |
| DHX29      | -0.0269257 | 1 |
| LRRC34     | 0.0629271  | 1 |
| CARS2      | 0.098824   | 1 |
| UBR1       | -0.0459082 | 1 |
| RXRA       | -0.1241566 | 1 |
| ELP2       | 0.1018165  | 1 |
| PTPN9      | -0.0947014 | 1 |
| IGF2BP3    | -0.0539029 | 1 |
| CHTOP      | -0.0493215 | 1 |
| GPRC5C     | -0.0396929 | 1 |
| SMG6       | -0.0297083 | 1 |
| ANGPTL6    | 0.0687726  | 1 |
| CCDC30     | 0.0695647  | 1 |

|            |            |   |
|------------|------------|---|
| HSCB       | 0.1138343  | 1 |
| FAM221A    | 0.0538091  | 1 |
| HERPUD2    | -0.1018616 | 1 |
| PRICKLE3   | 0.0219275  | 1 |
| WWC3       | 0.0387016  | 1 |
| LARP4B     | 0.0125303  | 1 |
| NAA60      | -0.1005123 | 1 |
| OSBPL3     | 0.0337038  | 1 |
| NIPSNAP3A  | -0.0654928 | 1 |
| PAXX       | -0.0296698 | 1 |
| RPUSD4     | 0.0502977  | 1 |
| SNHG29     | -0.1471872 | 1 |
| PYCR1      | 0.0731741  | 1 |
| ZNF700     | 0.0057964  | 1 |
| GOLGA8B    | 0.0341663  | 1 |
| RETREG3    | -0.0701268 | 1 |
| RAB7A      | -0.1283734 | 1 |
| ZNF441     | 0.0173438  | 1 |
| RHOT2      | -0.0306798 | 1 |
| H2AFY      | 0.1461801  | 1 |
| NMB        | 0.0866649  | 1 |
| COMT       | 0.106612   | 1 |
| POLE4      | 0.1141544  | 1 |
| ZNHIT2     | -0.0630252 | 1 |
| KDM4B      | 0.0137229  | 1 |
| PRPF19     | 0.0641632  | 1 |
| ATF7IP2    | -0.0794256 | 1 |
| TRMT10A    | 0.0308884  | 1 |
| N4BP2L1    | -0.0746502 | 1 |
| ELOVL1     | -0.0704863 | 1 |
| ABT1       | -0.1185968 | 1 |
| EIF2B4     | 0.0294571  | 1 |
| AC135050.6 | -0.0262974 | 1 |
| PMPCA      | -0.037224  | 1 |
| NETO2      | 0.052437   | 1 |
| AL096870.8 | 0.0585611  | 1 |
| TSPOAP1    | 0.0517658  | 1 |
| KLHL42     | 0.0621086  | 1 |
| TNPO3      | -0.0450934 | 1 |
| DYNLRB1    | 0.1269658  | 1 |
| ZNF23      | 0.0531916  | 1 |
| UTP4       | 0.0543493  | 1 |
| ARL6IP6    | 0.03598    | 1 |
| MAPK3      | -0.0896903 | 1 |
| MOB4       | -0.0892883 | 1 |
| C7orf26    | 0.0452708  | 1 |
| IMMP2L     | 0.1012228  | 1 |
| CENPF      | 0.1347802  | 1 |
| TMEM38B    | 0.1288987  | 1 |
| XPC        | 0.1048655  | 1 |



|            |            |   |
|------------|------------|---|
| UBE2W      | 0.0329272  | 1 |
| RHOQ       | -0.0845362 | 1 |
| NKIRAS1    | 0.0686398  | 1 |
| TTYH3      | -0.0901106 | 1 |
| SLC41A3    | -0.0319272 | 1 |
| ZDHHC9     | 0.0748371  | 1 |
| SMIM7      | 0.0492117  | 1 |
| ZNF496     | 0.0384984  | 1 |
| ABCD4      | -0.0680145 | 1 |
| TRA2A      | -0.1494278 | 1 |
| SLC38A10   | 0.1110944  | 1 |
| RABEP2     | -0.1357196 | 1 |
| RPP14      | 0.0434169  | 1 |
| AVEN       | 0.0368628  | 1 |
| PSMG3      | -0.0087668 | 1 |
| FAM91A1    | -0.023633  | 1 |
| HOXB4      | 0.0432697  | 1 |
| DDHD1      | -0.0979892 | 1 |
| ARL17A     | 0.0584331  | 1 |
| ZNF197     | 0.0591406  | 1 |
| THAP12     | -0.097768  | 1 |
| MTERF4     | 0.1390965  | 1 |
| CBY1       | -0.0434782 | 1 |
| OBI1       | 0.0687333  | 1 |
| MED19      | -0.1108014 | 1 |
| SFT2D3     | 0.0392764  | 1 |
| NDUFA5     | 0.0390928  | 1 |
| PPFIBP1    | 0.0514759  | 1 |
| FKBP7      | 0.0566922  | 1 |
| GTF2E2     | 0.0515901  | 1 |
| GGA1       | -0.1487803 | 1 |
| GSTP1      | 0.1248849  | 1 |
| FAM106A    | 0.0454718  | 1 |
| XIAP       | -0.1062392 | 1 |
| ZNF559     | 0.0903637  | 1 |
| TXLNG      | 0.092508   | 1 |
| OGFR       | -0.0534163 | 1 |
| RNF125     | -0.1615796 | 1 |
| TBL3       | 0.0580032  | 1 |
| DLGAP1-AS  | 0.0960442  | 1 |
| ZNF507     | 0.0836404  | 1 |
| LINC00672  | -0.0824872 | 1 |
| EML4       | -0.1122327 | 1 |
| DUSP11     | -0.1296592 | 1 |
| AC009812.1 | 0.0327633  | 1 |
| SETD3      | 0.0157925  | 1 |
| SMC5       | -0.0525739 | 1 |
| FAM98B     | 0.1034421  | 1 |
| CCDC82     | -0.1711346 | 1 |
| FAF1       | 0.0835538  | 1 |

|            |            |   |
|------------|------------|---|
| KMT2E-AS1  | 0.0767557  | 1 |
| ECH1       | 0.007628   | 1 |
| PDCD4-AS1  | 0.0727077  | 1 |
| STK16      | 0.0086059  | 1 |
| NAGPA      | 0.086202   | 1 |
| MCM9       | 0.0384664  | 1 |
| TMX2       | 0.080597   | 1 |
| CLMN       | -0.0599195 | 1 |
| LTN1       | 0.1195687  | 1 |
| HEXD       | 0.0577698  | 1 |
| TRMT44     | 0.0434423  | 1 |
| C2CD2L     | -0.0671742 | 1 |
| NKIRAS2    | -0.1158974 | 1 |
| NUDT5      | 0.0196696  | 1 |
| CEPT1      | 0.0582303  | 1 |
| ROMO1      | -0.0760554 | 1 |
| MKRN2      | -0.1028108 | 1 |
| CHRNA1     | -0.0278234 | 1 |
| OXL1       | 0.1061388  | 1 |
| CRISPLD1   | 0.0774966  | 1 |
| TATDN3     | -0.0235144 | 1 |
| PLIN2      | 0.0375747  | 1 |
| CLIC4      | -0.129778  | 1 |
| FAM13A-AS  | 0.003895   | 1 |
| AC005726.1 | 0.0434629  | 1 |
| SESTD1     | -0.1094141 | 1 |
| AC092747.4 | 0.1477413  | 1 |
| SENCR      | 0.0534192  | 1 |
| KIDINS220  | 0.0888678  | 1 |
| SENP7      | 0.0961769  | 1 |
| PPRC1      | -0.0277941 | 1 |
| SMG7       | -0.0908417 | 1 |
| SRF        | -0.0721384 | 1 |
| CASC4      | 0.114855   | 1 |
| AIDA       | -0.1340781 | 1 |
| RIMKLB     | -0.1005208 | 1 |
| ELP3       | 0.0591452  | 1 |
| G3BP1      | 0.1788066  | 1 |
| MAST3      | 0.0376943  | 1 |
| TUSC2      | -0.0922228 | 1 |
| VAR5       | 0.0360127  | 1 |
| ILDR2      | 0.0339819  | 1 |
| LSM14B     | 0.030296   | 1 |
| AC012360.3 | 0.0537714  | 1 |
| LPAR2      | -0.0741736 | 1 |
| RPL7L1     | 0.1634122  | 1 |
| ZBTB42     | -0.0430063 | 1 |
| CIZ1       | 0.025599   | 1 |
| RAN        | 0.1439872  | 1 |
| DYRK4      | 0.0466103  | 1 |

|            |            |   |
|------------|------------|---|
| TRAM1      | -0.0788525 | 1 |
| AC015802.6 | 0.029609   | 1 |
| ERO1A      | -0.0606436 | 1 |
| PANK3      | -0.101837  | 1 |
| UBE4B      | 0.030148   | 1 |
| RAB12      | 0.0436317  | 1 |
| ASH1L      | 0.0056963  | 1 |
| FBXO45     | 0.0422379  | 1 |
| MCM4       | 0.1055788  | 1 |
| FAM234A    | 0.0520048  | 1 |
| AP002748.4 | 0.0411152  | 1 |
| APTR       | -0.0552476 | 1 |
| MICOS10    | 0.1731417  | 1 |
| TBC1D25    | -0.0619622 | 1 |
| GLS        | 0.0947354  | 1 |
| GOLGA5     | -0.0046905 | 1 |
| NADK       | -0.0354522 | 1 |
| SNX6       | 0.0607399  | 1 |
| GTF2H1     | 0.0281822  | 1 |
| ESYT1      | -0.1014315 | 1 |
| SENP5      | -0.1043693 | 1 |
| SAFB2      | 0.0444278  | 1 |
| DEF6       | -0.0496157 | 1 |
| EHD4       | -0.0889027 | 1 |
| UBA6-AS1   | 0.0398428  | 1 |
| RHBDD1     | 0.0394726  | 1 |
| DOCK7      | 0.0364137  | 1 |
| EXOC8      | 0.0236216  | 1 |
| L2HGDH     | 0.0641196  | 1 |
| PDE7A      | 0.1355851  | 1 |
| CD151      | -0.1646012 | 1 |
| CYSLTR2    | -0.1354422 | 1 |
| RAB5B      | -0.0277957 | 1 |
| MBD6       | -0.0236007 | 1 |
| RBMS2      | -0.0722551 | 1 |
| SNX3       | 0.0501218  | 1 |
| TSPAN33    | 0.074254   | 1 |
| SFXN2      | 0.0551437  | 1 |
| EIF4EBP2   | 0.0658336  | 1 |
| ZNF606     | 0.0437681  | 1 |
| ZNRD2      | -0.0486695 | 1 |
| FAM3C      | -0.0645526 | 1 |
| ERLEC1     | 0.0757619  | 1 |
| DENND1C    | 0.0168525  | 1 |
| WASF1      | 0.0618383  | 1 |
| EIF4E2     | -0.0920516 | 1 |
| OXS1       | -0.0368314 | 1 |
| ORC4       | 0.0378941  | 1 |
| DOCK10     | 0.0435073  | 1 |
| NHLRC3     | 0.0293132  | 1 |

|            |            |   |
|------------|------------|---|
| PATZ1      | 0.053881   | 1 |
| DENND6A    | -0.0834076 | 1 |
| DNAJA3     | 0.0707841  | 1 |
| MED1       | 0.024639   | 1 |
| VPS13D     | 0.0194595  | 1 |
| ATXN10     | 0.068489   | 1 |
| TMED5      | -0.1005426 | 1 |
| POMT1      | 0.0145758  | 1 |
| SDHD       | 0.120263   | 1 |
| NUDT16     | 0.0439106  | 1 |
| BCS1L      | 0.0313555  | 1 |
| ZNF557     | 0.0718883  | 1 |
| UBA1       | 0.072901   | 1 |
| ZNF426     | -0.0051349 | 1 |
| XRCC2      | 0.0759824  | 1 |
| NMT1       | -0.0953831 | 1 |
| TMC8       | 0.06131    | 1 |
| PLSCR1     | -0.0239965 | 1 |
| TRRAP      | 0.0695247  | 1 |
| SUPV3L1    | -0.0818808 | 1 |
| DPEP2      | 0.0383114  | 1 |
| SAT2       | 0.0913904  | 1 |
| RBM45      | 0.041571   | 1 |
| AC004889.1 | -0.0443155 | 1 |
| TMEM154    | 0.0446195  | 1 |
| SYNC       | 0.0580746  | 1 |
| ZNF782     | 0.0370316  | 1 |
| SIRT7      | -0.0986729 | 1 |
| TUBGCP5    | 0.0334353  | 1 |
| METTL9     | -0.0704118 | 1 |
| NRSN2-AS1  | 0.0769855  | 1 |
| MTHFD1L    | 0.0661794  | 1 |
| ZSWIM9     | 0.0591921  | 1 |
| SPECC1L    | 0.0290119  | 1 |
| CNEP1R1    | -0.0765181 | 1 |
| MCTP1      | -0.036053  | 1 |
| CHMP1B     | -0.1141125 | 1 |
| RUFY2      | -0.1272986 | 1 |
| CLCN3      | -0.0021373 | 1 |
| AC011447.3 | 0.0645137  | 1 |
| PITPNA-AS1 | 0.07094    | 1 |
| PLA2G15    | -0.0806382 | 1 |
| CD47       | -0.1692822 | 1 |
| DISC1      | 0.0827226  | 1 |
| SNRNP48    | -0.0246906 | 1 |
| DHRS11     | 0.0727415  | 1 |
| TOR2A      | -0.0479917 | 1 |
| AAGAB      | -0.1023246 | 1 |
| H1FO       | -0.0002795 | 1 |
| TLL12      | 0.048411   | 1 |

|            |            |   |
|------------|------------|---|
| THG1L      | 0.0501129  | 1 |
| OSER1-DT   | 0.0511097  | 1 |
| OGFOD1     | 0.016482   | 1 |
| ZNF354B    | 0.0588506  | 1 |
| TOP3A      | 0.0231373  | 1 |
| HNRNPF     | -0.1533785 | 1 |
| ARL3       | -0.1039193 | 1 |
| MAP4K5     | 0.0416288  | 1 |
| PNKP       | -0.0761594 | 1 |
| LSM14A     | -0.0087561 | 1 |
| NF2        | 0.0531048  | 1 |
| RCBTB2     | 0.0500288  | 1 |
| AC093323.1 | 0.0469732  | 1 |
| TMOD2      | 0.0550182  | 1 |
| DCAF1      | -0.0144491 | 1 |
| PPIH       | 0.0763885  | 1 |
| DNM2       | -0.0462982 | 1 |
| HCK        | -0.0186029 | 1 |
| ZNF260     | 0.0556221  | 1 |
| PRSS57     | 0.1233253  | 1 |
| CCSER1     | 0.0501677  | 1 |
| HCST       | -0.1378203 | 1 |
| UBE2S      | -0.125358  | 1 |
| TNFRSF14   | 0.0843739  | 1 |
| CHCHD1     | 0.0602934  | 1 |
| SAYSD1     | 0.0444656  | 1 |
| SDCCAG8    | 0.2067111  | 1 |
| REXO1      | -0.0871789 | 1 |
| TRAPPC1    | 0.0700558  | 1 |
| ZNF101     | 0.0550656  | 1 |
| CHCHD6     | 0.0482815  | 1 |
| LINC02482  | 0.0493941  | 1 |
| ALKBH4     | 0.036709   | 1 |
| ZNF550     | 0.0511444  | 1 |
| GUCD1      | -0.0604871 | 1 |
| EXOSC9     | 0.0231424  | 1 |
| AK6        | 0.0492306  | 1 |
| HTT        | -0.1193862 | 1 |
| CD99L2     | 0.0396519  | 1 |
| FAM50A     | 0.0941973  | 1 |
| PEX16      | -0.076828  | 1 |
| CTU2       | 0.0447071  | 1 |
| NAA10      | -0.0490666 | 1 |
| ZNF738     | -0.0197171 | 1 |
| SLC7A1     | -0.0800281 | 1 |
| PPP1R12A   | -0.1298056 | 1 |
| ODF2L      | -0.095055  | 1 |
| PNN        | 0.185756   | 1 |
| GOT2       | 0.097833   | 1 |
| COPZ1      | -0.0736738 | 1 |

|          |            |   |
|----------|------------|---|
| ATP6V0E2 | -0.0049425 | 1 |
| DIP2A    | 0.0980799  | 1 |
| DHX8     | -0.0433251 | 1 |
| ZHX3     | 0.0444851  | 1 |
| RPS6     | 0.058109   | 1 |
| BAZ1B    | 0.0317378  | 1 |
| MN1      | -0.1133786 | 1 |
| TBC1D14  | 0.0178667  | 1 |
| ITM2A    | -0.1263965 | 1 |
| RFFL     | -0.1064623 | 1 |
| APPBP2   | -0.0541341 | 1 |
| ZNF28    | 0.013775   | 1 |
| PGAM5    | 0.0399302  | 1 |
| NUP155   | 0.0563004  | 1 |
| BOD1     | 0.0505852  | 1 |
| EMC6     | -0.0460651 | 1 |
| WBP4     | -0.0750416 | 1 |
| LRBA     | -0.0380125 | 1 |
| ERCC6    | 0.0553698  | 1 |
| SNHG10   | 0.0712456  | 1 |
| TMEM173  | -0.1100169 | 1 |
| PPT1     | 0.09588    | 1 |
| TMEM104  | -0.0793686 | 1 |
| LMAN2    | -0.100679  | 1 |
| PIGT     | -0.0866519 | 1 |
| GTF3C3   | 0.0438588  | 1 |
| TPRKB    | 0.0965725  | 1 |
| ZNF146   | 0.1600611  | 1 |
| SWSAP1   | 0.0636394  | 1 |
| CEP164   | 0.0808429  | 1 |
| PRPF38A  | -0.117478  | 1 |
| SND1     | 0.07081    | 1 |
| CERCAM   | 0.0339752  | 1 |
| CIPC     | 0.0116477  | 1 |
| PIK3IP1  | -0.0121035 | 1 |
| INTS11   | 0.0148769  | 1 |
| TMEM106A | 0.0029884  | 1 |
| NDUFS4   | 0.0835264  | 1 |
| EXOC5    | -0.0910341 | 1 |
| RPS19BP1 | -0.1005509 | 1 |
| SNHG9    | 0.116009   | 1 |
| PHLDB3   | 0.0260699  | 1 |
| ZP3      | 0.0658329  | 1 |
| USP34    | 0.057746   | 1 |
| RPS6KB1  | -0.074192  | 1 |
| EP300    | -0.0933101 | 1 |
| HNRNPL   | -0.1162421 | 1 |
| ZBTB26   | 0.0350786  | 1 |
| NFS1     | 0.0435189  | 1 |
| C8orf58  | -0.0334009 | 1 |

|            |            |   |
|------------|------------|---|
| ZC3HAV1    | -0.145281  | 1 |
| RFC5       | 0.0436267  | 1 |
| ZC3H18     | 0.0784858  | 1 |
| WSB1       | -0.1716482 | 1 |
| AC108519.1 | 0.0875409  | 1 |
| IFT140     | 0.0331888  | 1 |
| SRFBP1     | -0.0195363 | 1 |
| RCC2       | 0.0238861  | 1 |
| FNIP1      | -0.1232907 | 1 |
| CDCP1      | -0.0472608 | 1 |
| RPS14      | 0.0606001  | 1 |
| XKR8       | -0.0760629 | 1 |
| SHISA5     | -0.0764566 | 1 |
| AP001059.2 | -0.0555318 | 1 |
| IPO9       | 0.0441615  | 1 |
| MTMR10     | -0.1101201 | 1 |
| TMEM87B    | 0.0118332  | 1 |
| ARSB       | 0.0347132  | 1 |
| RDH14      | -0.0349866 | 1 |
| SNHG26     | 0.0590561  | 1 |
| ATXN7L3B   | 0.1550392  | 1 |
| AC004951.1 | 0.0581349  | 1 |
| ATAD2      | 0.0809911  | 1 |
| HDAC10     | -0.0384645 | 1 |
| SNF8       | -0.0007419 | 1 |
| INPP5B     | 0.0273055  | 1 |
| VIRMA      | 0.0456807  | 1 |
| MRGBP      | 0.0301416  | 1 |
| RPS6KA1    | -0.0343481 | 1 |
| DLAT       | 0.0237655  | 1 |
| AMDHD2     | 0.0036622  | 1 |
| NKX2-3     | 0.0777533  | 1 |
| DHX9       | 0.1647334  | 1 |
| ZNF334     | 0.0403856  | 1 |
| CARD8-AS1  | -0.0172065 | 1 |
| CCDC115    | 0.0757831  | 1 |
| TAP1       | 0.0391808  | 1 |
| TRIM24     | -0.0666346 | 1 |
| ZNF512B    | -0.0239892 | 1 |
| C4orf3     | 0.1157546  | 1 |
| CCNDBP1    | 0.0609562  | 1 |
| AIMP2      | 0.0882472  | 1 |
| BBX        | 0.1286316  | 1 |
| OLA1       | 0.1446337  | 1 |
| ZCRB1      | 0.1257988  | 1 |
| CARD16     | 0.0019067  | 1 |
| IRF2       | 0.0569462  | 1 |
| DCAF4      | 0.048712   | 1 |
| HPCAL1     | -0.0665155 | 1 |
| QTRT1      | -0.0864684 | 1 |

|            |            |   |
|------------|------------|---|
| SNX17      | 0.0073492  | 1 |
| SPATA2     | -0.0361398 | 1 |
| KRR1       | -0.0619264 | 1 |
| BRF1       | -0.1281526 | 1 |
| ATP9B      | 0.0492198  | 1 |
| PSMC3IP    | -0.061549  | 1 |
| SNX19      | 0.0178859  | 1 |
| SIRT1      | -0.0699422 | 1 |
| OTUD6B     | 0.0751243  | 1 |
| PRTN3      | 0.1529981  | 1 |
| GPANK1     | -0.0024274 | 1 |
| SKP1       | 0.1610529  | 1 |
| RAI1       | -0.1406635 | 1 |
| IBTK       | 0.1058965  | 1 |
| HOXB6      | -0.1554027 | 1 |
| AC118549.1 | 0.0890763  | 1 |
| CENPW      | -0.000963  | 1 |
| RPL7       | 0.0901712  | 1 |
| CENPC      | -0.0990485 | 1 |
| XPO7       | -0.0054761 | 1 |
| LYPLA1     | 0.0871039  | 1 |
| CCS        | -0.0356306 | 1 |
| TYK2       | -0.0500231 | 1 |
| SLC30A6    | 0.0612856  | 1 |
| VPS4A      | -0.0356784 | 1 |
| FANCA      | 0.0550492  | 1 |
| CMTM7      | 0.0471347  | 1 |
| UCK2       | -0.0167797 | 1 |
| TEX261     | 0.0058471  | 1 |
| ALDOA      | 0.0646699  | 1 |
| CCDC126    | 0.0338647  | 1 |
| HOOK3      | -0.0586243 | 1 |
| SSNA1      | 0.1422444  | 1 |
| PHKG2      | 0.0177892  | 1 |
| FAIM       | 0.0629584  | 1 |
| MAN2B2     | 0.0539866  | 1 |
| MTFR1L     | 0.0772537  | 1 |
| ANKRD36C   | 0.0315433  | 1 |
| CASP8AP2   | 0.1334193  | 1 |
| PLD4       | 0.0554851  | 1 |
| WDR75      | 0.0663191  | 1 |
| EIF4ENIF1  | -0.0368242 | 1 |
| ZNF398     | -0.0211434 | 1 |
| TM2D2      | -0.0030193 | 1 |
| OTUD4      | -0.0880654 | 1 |
| PRPF40A    | -0.1548631 | 1 |
| ROGDI      | 0.024565   | 1 |
| HIRIP3     | 0.0393096  | 1 |
| DENND4B    | -0.0561641 | 1 |
| CSTF2      | 0.0130147  | 1 |



|           |            |   |
|-----------|------------|---|
| DPH2      | 0.0587741  | 1 |
| CHMP2A    | -0.088059  | 1 |
| ADNP      | 0.042479   | 1 |
| PYM1      | -0.1533071 | 1 |
| SRR       | 0.0327329  | 1 |
| ZFAND3    | -0.0422535 | 1 |
| STRIP1    | -0.0465435 | 1 |
| JAK2      | 0.0498473  | 1 |
| TMEM44-AS | 0.0742053  | 1 |
| FDXR      | 0.0378991  | 1 |
| XPNPEP3   | 0.0624365  | 1 |
| SLC25A12  | -0.0163429 | 1 |
| ZC3H7B    | 0.0732605  | 1 |
| APOBEC3C  | 0.0970758  | 1 |
| TMEM156   | 0.1167676  | 1 |
| SFI1      | -0.0644002 | 1 |
| URGCP     | 0.0425661  | 1 |
| DYNLT3    | -0.0149692 | 1 |
| GATAD2B   | -0.0842513 | 1 |
| RRM2B     | -0.101699  | 1 |
| DIS3      | -0.0498428 | 1 |
| AARSD1    | 0.0635614  | 1 |
| LPCAT2    | 0.0592306  | 1 |
| FAM160A2  | -0.0650409 | 1 |
| SMCO4     | 0.0280055  | 1 |
| C6orf47   | -0.0880906 | 1 |
| TMEM170B  | 0.0287001  | 1 |
| CD27-AS1  | -0.0500779 | 1 |
| NOTCH2NL  | 0.0014045  | 1 |
| CALU      | 0.1005196  | 1 |
| PRKX      | 0.038875   | 1 |
| CASP3     | -0.1554346 | 1 |
| SLC35E3   | 0.0612448  | 1 |
| ABCC5     | 0.0438274  | 1 |
| PIGV      | 0.0308099  | 1 |
| IWS1      | -0.0568974 | 1 |
| PSMG2     | -0.1283262 | 1 |
| HMGCL     | 0.0272487  | 1 |
| ARMCX6    | -0.0928281 | 1 |
| TESMIN    | 0.0525716  | 1 |
| CD96      | 0.1632287  | 1 |
| PLB1      | -0.0327271 | 1 |
| PCMT1     | 0.0853635  | 1 |
| C18orf54  | 0.0396584  | 1 |
| PARP8     | 0.033998   | 1 |
| KIAA1109  | 0.0308653  | 1 |
| XYLT2     | 0.0471855  | 1 |
| LIN7C     | 0.045921   | 1 |
| GNB1      | -0.1193498 | 1 |
| RAB4A     | 0.0551131  | 1 |

|            |            |   |
|------------|------------|---|
| ABHD16A    | -0.0580688 | 1 |
| CXorf38    | 0.0940174  | 1 |
| GPR141     | 0.0201552  | 1 |
| TEN1       | -0.0698485 | 1 |
| BAD        | 0.0433194  | 1 |
| TTC39C     | -0.0842894 | 1 |
| DCTD       | 0.0212478  | 1 |
| HCLS1      | 0.191678   | 1 |
| UNC50      | 0.1006714  | 1 |
| HAX1       | 0.0661109  | 1 |
| HDAC7      | -0.1088627 | 1 |
| PISD       | -0.0696555 | 1 |
| PI4KA      | 0.05574    | 1 |
| TNFAIP3    | -0.1294121 | 1 |
| DZIP3      | 0.0180975  | 1 |
| ATG14      | 0.0441179  | 1 |
| ZNF283     | 0.0472299  | 1 |
| AKT1       | 0.0649029  | 1 |
| CTBS       | 0.1009156  | 1 |
| RIOK1      | 0.0395793  | 1 |
| MAPK14     | -0.0467586 | 1 |
| DHX36      | -0.0336181 | 1 |
| CUTC       | 0.086311   | 1 |
| CEP104     | 0.069669   | 1 |
| REST       | -0.0924064 | 1 |
| CCDC90B    | 0.0569416  | 1 |
| UBP1       | -0.059958  | 1 |
| HPS4       | 0.0109876  | 1 |
| JKAMP      | 0.0783952  | 1 |
| NUP93      | -0.0297675 | 1 |
| ZNF620     | 0.0489005  | 1 |
| ACTR2      | 0.0800209  | 1 |
| ASMTL      | -0.1224832 | 1 |
| FCHO1      | 0.0547425  | 1 |
| ZCCHC9     | 0.0576542  | 1 |
| AC002310.1 | 0.0707794  | 1 |
| TUBD1      | 0.0384241  | 1 |
| PPP1R21    | 0.0332636  | 1 |
| LMBR1L     | -0.1044994 | 1 |
| IREB2      | -0.0463712 | 1 |
| TAF7       | 0.1751112  | 1 |
| FKRP       | -0.0436957 | 1 |
| TRAPPC5    | 0.1204901  | 1 |
| HGF        | 0.0573747  | 1 |
| DHX34      | 0.0125767  | 1 |
| AL035587.2 | 0.0525921  | 1 |
| SP3        | -0.1294581 | 1 |
| HSD17B8    | 0.0563398  | 1 |
| VPS13A     | 0.0711175  | 1 |
| PIKFYVE    | 0.1079094  | 1 |

|            |            |   |
|------------|------------|---|
| KLHDC1     | 0.0606589  | 1 |
| SLC25A25-A | 0.0303357  | 1 |
| SNAPC5     | 0.0802182  | 1 |
| ILRUN      | -0.0532126 | 1 |
| ASB7       | -0.0454551 | 1 |
| RETREG2    | 0.0911378  | 1 |
| TTC9       | -0.0604222 | 1 |
| RNF40      | -0.0040647 | 1 |
| STK38      | 0.0578459  | 1 |
| SNRNP35    | 0.0170405  | 1 |
| ETFA       | 0.0852358  | 1 |
| MAVS       | -0.0616006 | 1 |
| GNB4       | -0.1382351 | 1 |
| C16orf72   | -0.1032009 | 1 |
| POC1B      | -0.0226693 | 1 |
| AEBP2      | -0.057725  | 1 |
| CCDC167    | 0.0309315  | 1 |
| DDX51      | 0.0618316  | 1 |
| FBXO28     | -0.0955541 | 1 |
| PPP1R11    | -0.0285693 | 1 |
| AC090204.1 | 0.0514953  | 1 |
| DOCK8      | 0.0936029  | 1 |
| EIF2B5     | 0.0062671  | 1 |
| GPS2       | 0.0002335  | 1 |
| CCDC159    | 0.0099229  | 1 |
| RNF4       | -0.1579499 | 1 |
| ATL2       | 0.0446198  | 1 |
| PRR14L     | 0.0624017  | 1 |
| POMGNT1    | 0.0496172  | 1 |
| GOLGA8O    | 0.0802494  | 1 |
| ABHD17A    | -0.1174936 | 1 |
| TAS2R4     | 0.0508     | 1 |
| CCDC47     | 0.0147683  | 1 |
| DHX38      | 0.0180717  | 1 |
| CBFA2T3    | 0.0071014  | 1 |
| ZNF451     | -0.107197  | 1 |
| ANAPC10    | -0.0384968 | 1 |
| INPP5A     | 0.0330796  | 1 |
| SETD6      | 0.0302112  | 1 |
| UPF1       | -0.0870821 | 1 |
| PRR34-AS1  | -0.0729757 | 1 |
| VPS26C     | -0.1348765 | 1 |
| DPP7       | 0.1347556  | 1 |
| ANXA2R     | -0.044861  | 1 |
| FDX2       | -0.083123  | 1 |
| GBE1       | 0.0197269  | 1 |
| AL009179.2 | 0.0631727  | 1 |
| HAUS6      | 0.0695949  | 1 |
| CLIP2      | -0.0407367 | 1 |
| COPS3      | -0.0634042 | 1 |

|            |            |   |
|------------|------------|---|
| SLC37A1    | -0.0658683 | 1 |
| SLC36A4    | 0.0558509  | 1 |
| ATAD5      | 0.1088421  | 1 |
| CBWD3      | 0.0225948  | 1 |
| HIST1H2AH  | 0.0407512  | 1 |
| CCDC124    | 0.0330639  | 1 |
| MMADHC     | 0.039339   | 1 |
| PARP16     | 0.0398089  | 1 |
| POLR3E     | 0.0392865  | 1 |
| MLXIP      | 0.0538656  | 1 |
| SEPTIN1    | -0.0758457 | 1 |
| EIF3D      | -0.1034827 | 1 |
| TBC1D2B    | 0.0129324  | 1 |
| MZT2B      | 0.035457   | 1 |
| ECPAS      | 0.0417953  | 1 |
| CLU        | 0.1364401  | 1 |
| CPEB4      | 0.0565843  | 1 |
| RAC3       | 0.0329085  | 1 |
| DVL1       | 0.0301391  | 1 |
| NBR2       | 0.0566065  | 1 |
| ZNHIT1     | 0.1139992  | 1 |
| SCD5       | -0.0774524 | 1 |
| UQCRC2     | 0.084593   | 1 |
| RPLP0      | 0.0710162  | 1 |
| IFFO1      | 0.0197845  | 1 |
| STX4       | -0.0021968 | 1 |
| MMS19      | 0.0181113  | 1 |
| PNPO       | 0.0663595  | 1 |
| TMEM223    | 0.0160991  | 1 |
| ZXDC       | 0.037006   | 1 |
| SYNGAP1    | -0.0523586 | 1 |
| MTFP1      | 0.0049666  | 1 |
| FYTTD1     | -0.1148184 | 1 |
| COX10-AS1  | 0.0474695  | 1 |
| C12orf4    | 0.0400125  | 1 |
| PPME1      | 0.0451463  | 1 |
| CTDSP1     | -0.1196087 | 1 |
| RAB4B      | 0.0870232  | 1 |
| NPIP2      | 0.0455161  | 1 |
| FBXL17     | 0.0761589  | 1 |
| DANT2      | 0.0293998  | 1 |
| SWAP70     | -0.143865  | 1 |
| MSH5       | 0.0230665  | 1 |
| NCLN       | -0.0269653 | 1 |
| ANKRD36    | -0.0275733 | 1 |
| ORC6       | 0.0071415  | 1 |
| CDC27      | -0.1166563 | 1 |
| SAP30L-AS1 | 0.0313778  | 1 |
| IBA57      | 0.0224968  | 1 |
| DDX60      | 0.0758711  | 1 |

|            |            |   |
|------------|------------|---|
| FEM1C      | -0.0864095 | 1 |
| JRKL       | 0.1043577  | 1 |
| PSMD8      | -0.0589022 | 1 |
| ICA1       | 0.0787457  | 1 |
| ACSS1      | 0.0024985  | 1 |
| MAST4      | 0.0376717  | 1 |
| AC005520.2 | 0.0382912  | 1 |
| OXR1       | 0.1200439  | 1 |
| PARL       | 0.0590087  | 1 |
| USP24      | 0.0386617  | 1 |
| HINT3      | 0.0205057  | 1 |
| FLI1       | 0.0992866  | 1 |
| PDS5A      | 0.0645431  | 1 |
| UTP25      | 0.0691449  | 1 |
| TRPM7      | 0.0694592  | 1 |
| TBC1D10C   | -0.0656468 | 1 |
| SURF1      | 0.0323044  | 1 |
| PPP2R5E    | 0.0013738  | 1 |
| TMEM102    | -0.0717985 | 1 |
| STX7       | 0.0316816  | 1 |
| APC        | -0.0868036 | 1 |
| SCRN2      | 0.041484   | 1 |
| B3GNT2     | 0.1465446  | 1 |
| BTG1       | -0.0299942 | 1 |
| ALKBH8     | 0.0335855  | 1 |
| SARM1      | 0.0528669  | 1 |
| ZNF629     | -0.0173343 | 1 |
| ABTB1      | 0.0701387  | 1 |
| DNAJC16    | 0.0854557  | 1 |
| CHROMR     | 0.0518495  | 1 |
| YBEY       | 0.0432879  | 1 |
| CENPP      | 0.029587   | 1 |
| DNAJC4     | -0.0113253 | 1 |
| MBTPS2     | 0.0283825  | 1 |
| GBA        | 0.0193924  | 1 |
| CCDC71L    | -0.0637919 | 1 |
| GPR160     | 0.0464248  | 1 |
| MRPS7      | 0.0506127  | 1 |
| MRPL20     | 0.1678609  | 1 |
| GLG1       | 0.1020025  | 1 |
| TASP1      | -0.0605411 | 1 |
| MRPL52     | 0.0411694  | 1 |
| TEX10      | 0.0351337  | 1 |
| DNPEP      | 0.0737121  | 1 |
| RNASEH1    | -0.0540713 | 1 |
| ZBTB14     | 0.0562207  | 1 |
| ZSCAN16    | -0.0776596 | 1 |
| CDC73      | -0.1345461 | 1 |
| UBE2L6     | 0.0225648  | 1 |
| MED12      | 0.0939558  | 1 |

|            |            |   |
|------------|------------|---|
| SOX18      | -0.1079688 | 1 |
| ST7L       | 0.0510822  | 1 |
| RIF1       | 0.0883729  | 1 |
| LEMD3      | -0.0702021 | 1 |
| ZNF528-AS1 | 0.048518   | 1 |
| EOGT       | 0.0105205  | 1 |
| AC015871.4 | -0.0016786 | 1 |
| SBNO2      | -0.0972438 | 1 |
| REXO5      | 0.061156   | 1 |
| ZNF524     | 0.046836   | 1 |
| RBKS       | 0.0289074  | 1 |
| NDUFS1     | 0.0938988  | 1 |
| RMI1       | 0.0916066  | 1 |
| FRG1       | 0.0315703  | 1 |
| METTLL17   | -0.0718449 | 1 |
| NSMCE3     | 0.0679122  | 1 |
| STOM       | -0.0417377 | 1 |
| SVBP       | -0.1108605 | 1 |
| AC103691.1 | 0.0340903  | 1 |
| NUDT19     | 0.0442742  | 1 |
| MLLT1      | 0.0224159  | 1 |
| FNTB       | 0.0528546  | 1 |
| TFDP1      | 0.0629679  | 1 |
| EPS8       | 0.065125   | 1 |
| PGS1       | -0.0367526 | 1 |
| VAV1       | 0.0679327  | 1 |
| VAV3       | 0.0678296  | 1 |
| KPNA5      | -0.1055376 | 1 |
| BACE1      | 0.052614   | 1 |
| CNNM2      | 0.0405885  | 1 |
| SPCS3      | -0.1654496 | 1 |
| TFDP2      | 0.1642848  | 1 |
| TTF1       | -0.0624457 | 1 |
| EFCAB2     | 0.0772916  | 1 |
| SON        | 0.103384   | 1 |
| HARS       | -0.0140654 | 1 |
| AASDH      | 0.1028668  | 1 |
| PLA2G4A    | -0.0113421 | 1 |
| RAC2       | -0.1202157 | 1 |
| PADI4      | 0.1084058  | 1 |
| BAG6       | -0.0278168 | 1 |
| AL109811.2 | 0.0776063  | 1 |
| MICAL3     | 0.0367085  | 1 |
| LCLAT1     | 0.0080753  | 1 |
| USP30-AS1  | -0.0362438 | 1 |
| SFT2D2     | -0.1294429 | 1 |
| PFKL       | -0.0060934 | 1 |
| UHMK1      | 0.1026895  | 1 |
| ASCC2      | 0.0106535  | 1 |
| PPP2R5C    | -0.0813746 | 1 |

|            |            |   |
|------------|------------|---|
| ATP7A      | 0.0644875  | 1 |
| NUDT15     | 0.0524037  | 1 |
| SELENOO    | -0.0320211 | 1 |
| KDSR       | 0.1135127  | 1 |
| CTDNEP1    | -0.0374549 | 1 |
| TPI1       | 0.0662378  | 1 |
| ANKRD42    | -0.0766882 | 1 |
| NEU1       | 0.0034343  | 1 |
| FOXRED1    | 0.0215767  | 1 |
| SMCR8      | 0.0311616  | 1 |
| ULK1       | -0.0571958 | 1 |
| CLN5       | 0.0075347  | 1 |
| TMEM273    | -0.1118521 | 1 |
| BCL2L2     | 0.043891   | 1 |
| STMN1      | -0.0618204 | 1 |
| OCIAD2     | -0.1203971 | 1 |
| CLEC16A    | 0.0436413  | 1 |
| AP2A2      | -0.0034813 | 1 |
| WDR54      | -0.0559398 | 1 |
| TSEN54     | 0.0460603  | 1 |
| GAK        | -0.0660696 | 1 |
| MKRN1      | -0.1108787 | 1 |
| TRAM2-AS1  | 0.0653609  | 1 |
| TMEM135    | 0.0350764  | 1 |
| TRIM56     | -0.0838649 | 1 |
| NQO2       | 0.0048979  | 1 |
| SPIN1      | 0.079119   | 1 |
| MEPCE      | 0.0248914  | 1 |
| CCDC28B    | -0.0533303 | 1 |
| ZNF793     | 0.0463791  | 1 |
| UBQLN2     | 0.0420672  | 1 |
| TANGO2     | 0.0207006  | 1 |
| AC099778.1 | 0.0342161  | 1 |
| SMCHD1     | 0.1150961  | 1 |
| NENF       | 0.0971349  | 1 |
| TXNRD1     | -0.114969  | 1 |
| AC009506.1 | 0.0639149  | 1 |
| ADPGK      | -0.0325127 | 1 |
| RBM6       | 0.137081   | 1 |
| COBLL1     | 0.1139026  | 1 |
| C1D        | -0.064546  | 1 |
| SURF6      | 0.0881754  | 1 |
| BMP1       | -0.0507444 | 1 |
| PTK7       | 0.0146702  | 1 |
| MGAT5      | 0.0198956  | 1 |
| LINC00884  | 0.0487696  | 1 |
| RPRD2      | 0.0448467  | 1 |
| DGKG       | 0.0412968  | 1 |
| WFDC1      | 0.0465324  | 1 |
| ZNF655     | -0.1136934 | 1 |

|            |            |   |
|------------|------------|---|
| MXRA7      | -0.0400043 | 1 |
| RBBP9      | 0.0442244  | 1 |
| AL049840.4 | -0.0593447 | 1 |
| XPR1       | 0.0479573  | 1 |
| ATP1A1     | -0.1408024 | 1 |
| QARS       | 0.0830039  | 1 |
| FBXO22     | 0.0259071  | 1 |
| NDUFC2     | 0.1197083  | 1 |
| SDR39U1    | -0.0141642 | 1 |
| MCM5       | -0.0906202 | 1 |
| AC005562.1 | -0.0424325 | 1 |
| PAN3       | 0.0081741  | 1 |
| NDRG3      | 0.0463041  | 1 |
| SLC25A6    | -0.1099421 | 1 |
| EAF2       | -0.0237395 | 1 |
| VRK3       | -0.0039672 | 1 |
| AC108134.3 | 0.0568079  | 1 |
| ZSCAN21    | 0.0266869  | 1 |
| YLPM1      | 0.1670451  | 1 |
| SUPT4H1    | -0.0716072 | 1 |
| DHX15      | -0.110945  | 1 |
| TEX9       | 0.0200086  | 1 |
| PIGL       | 0.0406688  | 1 |
| RPL9       | 0.0566136  | 1 |
| HERC3      | -0.063475  | 1 |
| FHIT       | 0.0690349  | 1 |
| HCG25      | 0.0391411  | 1 |
| EBP        | 0.0083977  | 1 |
| NPTN       | -0.006146  | 1 |
| BAHCC1     | 0.1315888  | 1 |
| ACY3       | -0.0704381 | 1 |
| ZNF585B    | 0.0708611  | 1 |
| GAPVD1     | -0.0297551 | 1 |
| AC007406.5 | 0.0448585  | 1 |
| CRYZL1     | -0.0626457 | 1 |
| PABPN1     | -0.1206039 | 1 |
| ZNF714     | 0.0556883  | 1 |
| SEC24B-AS  | 0.0243986  | 1 |
| WWP2       | -0.0414135 | 1 |
| FAM98A     | 0.0722303  | 1 |
| VWA1       | -0.0570327 | 1 |
| MRPS14     | 0.042773   | 1 |
| ACAA2      | 0.0801126  | 1 |
| ATP6V1C1   | 0.0088526  | 1 |
| STK4       | -0.1501207 | 1 |
| CBX5       | 0.1486007  | 1 |
| SIAH1      | -0.0482961 | 1 |
| ERICH6-AS1 | -0.1038465 | 1 |
| ALG11      | 0.0498777  | 1 |
| SH3BP5L    | -0.0397991 | 1 |



|            |            |   |
|------------|------------|---|
| KANSL1-AS1 | 0.0183076  | 1 |
| GTPBP1     | -0.0871557 | 1 |
| PLAGL1     | 0.0515681  | 1 |
| MORC2-AS1  | 0.0449664  | 1 |
| CDK12      | -0.0071877 | 1 |
| KMT5C      | -0.0562478 | 1 |
| CDC37      | -0.0708529 | 1 |
| KCNAB2     | 0.08726    | 1 |
| PRPF39     | 0.0384338  | 1 |
| SAP30      | 0.0857897  | 1 |
| NLK        | 0.0572732  | 1 |
| POC1B-AS1  | 0.0706902  | 1 |
| CENPL      | 0.0174161  | 1 |
| TLK1       | 0.0772183  | 1 |
| PPP1R2     | -0.0991704 | 1 |
| GPAT4      | -0.0335377 | 1 |
| MCMBP      | 0.0171437  | 1 |
| YJU2       | -0.0753244 | 1 |
| AL390728.6 | 0.0399965  | 1 |
| NUDT21     | 0.0149511  | 1 |
| SLC35D1    | 0.0191114  | 1 |
| PAQR7      | 0.0331484  | 1 |
| MTHFD2     | -0.1620619 | 1 |
| MYL5       | 0.0160937  | 1 |
| WDR60      | 0.1187597  | 1 |
| SNHG12     | -0.0904673 | 1 |
| GOLGA7     | 0.0663812  | 1 |
| DCUN1D3    | 0.044249   | 1 |
| MMD        | 0.028239   | 1 |
| BORCS5     | 0.0547887  | 1 |
| VAMP2      | 0.0398073  | 1 |
| PGM3       | 0.0227468  | 1 |
| RFC2       | -0.0303772 | 1 |
| TAF4       | 0.0238952  | 1 |
| RFC3       | 0.0362045  | 1 |
| SWT1       | 0.037618   | 1 |
| TIGD1      | 0.0464537  | 1 |
| ATG5       | -0.0634706 | 1 |
| FAAP20     | 0.1047504  | 1 |
| TP53BP1    | 0.1286132  | 1 |
| SIPA1      | -0.0639748 | 1 |
| VCPIP1     | 0.0080293  | 1 |
| TOMM34     | -0.0126632 | 1 |
| MNT        | -0.1055234 | 1 |
| AC096992.2 | 0.0379063  | 1 |
| ZNF251     | 0.0167933  | 1 |
| MEA1       | 0.0465734  | 1 |
| INAFM1     | -0.0334112 | 1 |
| DBF4B      | 0.0252228  | 1 |
| SEMA4A     | 0.006435   | 1 |

|            |            |   |
|------------|------------|---|
| MARCH2     | -0.0655843 | 1 |
| GANAB      | 0.1053375  | 1 |
| TMEM128    | 0.0432689  | 1 |
| ZKSCAN2-D  | 0.0354665  | 1 |
| AL035446.1 | -0.0270176 | 1 |
| PARP2      | 0.0124488  | 1 |
| FAM241A    | -0.0639962 | 1 |
| SPHK2      | 0.025699   | 1 |
| C4orf48    | -0.073662  | 1 |
| PRKCI      | -0.024024  | 1 |
| CINP       | 0.0528048  | 1 |
| DYNC2LI1   | 0.04265    | 1 |
| DUS4L      | 0.0484358  | 1 |
| AL138724.1 | -0.0485025 | 1 |
| EHD2       | -0.0616642 | 1 |
| PEA15      | -0.0780869 | 1 |
| TENT2      | -0.0715842 | 1 |
| PGAM1      | -0.1357967 | 1 |
| PRMT1      | -0.0267634 | 1 |
| AGA        | 0.0534278  | 1 |
| RASSF7     | -0.0419661 | 1 |
| ALG10      | 0.0302513  | 1 |
| ITPR1      | 0.0876908  | 1 |
| TRAF6      | -0.0735981 | 1 |
| SLC25A20   | 0.0199627  | 1 |
| SNIP1      | -0.0534961 | 1 |
| HS1BP3     | -0.0290315 | 1 |
| BAZ2B      | -0.1188761 | 1 |
| MTHFD2L    | -0.1104894 | 1 |
| USP21      | 0.0065391  | 1 |
| LGALS8     | 0.0700904  | 1 |
| FKBP14     | 0.0487828  | 1 |
| PEAK1      | -0.113451  | 1 |
| MAML3      | 0.1435045  | 1 |
| HDAC5      | -0.0996027 | 1 |
| E4F1       | -0.0666327 | 1 |
| WDR83OS    | 0.0306776  | 1 |
| KPTN       | -0.0213811 | 1 |
| TMEM62     | -0.0260646 | 1 |
| MITF       | 0.049685   | 1 |
| GABPB2     | 0.0735289  | 1 |
| FXR1       | -0.0825155 | 1 |
| VPS8       | 0.0614254  | 1 |
| SSR3       | 0.1200643  | 1 |
| ZNF345     | 0.0280979  | 1 |
| GALNT10    | 0.0249864  | 1 |
| ZNF672     | 0.0404015  | 1 |
| SPSB3      | -0.0988729 | 1 |
| MTG1       | 0.0603553  | 1 |
| ZSCAN32    | -0.0085851 | 1 |

|            |            |   |
|------------|------------|---|
| C6orf120   | 0.0121494  | 1 |
| ARHGAP19   | 0.0140495  | 1 |
| LAS1L      | 0.1077221  | 1 |
| TBK1       | -0.0362172 | 1 |
| CWC22      | -0.082552  | 1 |
| RPF1       | -0.0116754 | 1 |
| ZNF184     | 0.0285282  | 1 |
| JMJD4      | 0.0057403  | 1 |
| BPHL       | 0.0291817  | 1 |
| ZFYVE16    | -0.0372091 | 1 |
| MRPL48     | 0.0471091  | 1 |
| STT3B      | -0.1199444 | 1 |
| PHKG1      | -0.0373383 | 1 |
| RNPC3      | 0.0787641  | 1 |
| C17orf80   | 0.053877   | 1 |
| MYO9B      | -0.039508  | 1 |
| ZFPL1      | -0.037179  | 1 |
| ANKHD1     | 0.0642267  | 1 |
| MROH6      | 0.0401088  | 1 |
| SLC25A32   | -0.0232133 | 1 |
| COQ10B     | -0.0112394 | 1 |
| CTBP1      | 0.0786004  | 1 |
| TOB1       | -0.087208  | 1 |
| SCYL2      | -0.0387767 | 1 |
| PKIG       | -0.0684633 | 1 |
| MTERF1     | 0.0472379  | 1 |
| SLC2A5     | 0.0078162  | 1 |
| TBP        | 0.0195155  | 1 |
| DESI1      | 0.04866    | 1 |
| PANK2      | -0.1123422 | 1 |
| WAPL       | -0.0685636 | 1 |
| BDP1       | 0.0507369  | 1 |
| SLC10A7    | 0.0221837  | 1 |
| FGD3       | -0.0373048 | 1 |
| BYSL       | 0.0268296  | 1 |
| CSDE1      | -0.1686191 | 1 |
| EIF4G2     | -0.0822291 | 1 |
| AC008969.1 | 0.0836718  | 1 |
| MTRR       | 0.0267533  | 1 |
| ZNF576     | 0.0559895  | 1 |
| GLRX2      | -0.0758364 | 1 |
| DHRS7      | -0.0116357 | 1 |
| HS6ST1     | 0.0141416  | 1 |
| AFMID      | 0.0570208  | 1 |
| BTF3L4     | 0.0571201  | 1 |
| DNAJC8     | 0.1117778  | 1 |
| WIPF2      | -0.1084398 | 1 |
| GATD3A     | 0.0497102  | 1 |
| PDE6G      | -0.0446943 | 1 |
| GNB1L      | 0.0388924  | 1 |

|            |            |   |
|------------|------------|---|
| RMDN3      | 0.010241   | 1 |
| P2RY11     | -0.0513553 | 1 |
| PKNOX1     | -0.0025999 | 1 |
| MZT1       | 0.075491   | 1 |
| AC002467.1 | -0.0240195 | 1 |
| SLC38A6    | 0.020437   | 1 |
| NOC2L      | 0.0413856  | 1 |
| DDX20      | -0.0802288 | 1 |
| ANGEL1     | 0.0266727  | 1 |
| ARMT1      | -0.002171  | 1 |
| LINC00211  | 0.059549   | 1 |
| PSMA2      | -0.0513951 | 1 |
| KIF13A     | 0.0474351  | 1 |
| CHST14     | 0.0594382  | 1 |
| KTI12      | 0.0659808  | 1 |
| PHF19      | -0.0981725 | 1 |
| SLC7A6OS   | 0.0065375  | 1 |
| POLH       | 0.0398355  | 1 |
| MTHFSD     | 0.0167099  | 1 |
| SCAMP3     | 0.1154016  | 1 |
| DDX24      | -0.0838627 | 1 |
| KLHDC2     | -0.0379156 | 1 |
| FBXO21     | -0.0538894 | 1 |
| CEP295     | 0.0425081  | 1 |
| ENOPH1     | 0.0515957  | 1 |
| ZNF669     | 0.0036323  | 1 |
| ARSA       | -0.0755594 | 1 |
| TGS1       | 0.0474024  | 1 |
| C10orf143  | 0.0401599  | 1 |
| DNAJC24    | 0.0387945  | 1 |
| RBCK1      | -0.0488608 | 1 |
| ACOT4      | 0.0372174  | 1 |
| PPAN       | -0.0617938 | 1 |
| JADE1      | 0.0558812  | 1 |
| DYSF       | -0.0258362 | 1 |
| CTU1       | 0.0393586  | 1 |
| GOLGB1     | -0.0332773 | 1 |
| ZNF677     | 0.0533003  | 1 |
| AC009779.2 | 0.0336124  | 1 |
| TLR9       | -0.051918  | 1 |
| CWC15      | -0.0723315 | 1 |
| TMEM141    | 0.0724112  | 1 |
| JMY        | 0.0331807  | 1 |
| WIZ        | 0.0088827  | 1 |
| ZNF649     | 0.0514112  | 1 |
| NKTR       | -0.1561731 | 1 |
| SCARF1     | -0.0868379 | 1 |
| PHF10      | 0.0367988  | 1 |
| LINC01806  | -0.0420549 | 1 |
| FUT10      | 0.0840041  | 1 |

|           |            |   |
|-----------|------------|---|
| CGRRF1    | -0.1121482 | 1 |
| ZMYM6     | -0.0073909 | 1 |
| SLC37A4   | 0.0454051  | 1 |
| RNF8      | 0.0627231  | 1 |
| CSTA      | 0.1045828  | 1 |
| ZNF490    | 0.0433716  | 1 |
| SCAMP2    | -0.0766629 | 1 |
| MAPKAPK5- | 0.099708   | 1 |
| HSPA14    | 0.0015049  | 1 |
| METTL2A   | 0.0449821  | 1 |
| SCAI      | 0.0841343  | 1 |
| FKTN      | 0.0861604  | 1 |
| SOCS2-AS1 | 0.0239249  | 1 |
| RAB27B    | 0.0103413  | 1 |
| IFI6      | -0.0052458 | 1 |
| MAGED1    | -0.0005704 | 1 |
| CHD1L     | 0.0392609  | 1 |
| SART1     | -0.0353375 | 1 |
| CANX      | 0.1210213  | 1 |
| EXOC1     | 0.0008172  | 1 |
| PSME3     | 0.0187381  | 1 |
| GRIPAP1   | -0.0807294 | 1 |
| CNPY3     | -0.0927394 | 1 |
| SAP130    | 0.0355742  | 1 |
| NCOR2     | 0.0100491  | 1 |
| PDHX      | -0.0042051 | 1 |
| TMEM179B  | 0.0676939  | 1 |
| SAR1B     | 0.0540433  | 1 |
| GSR       | 0.0486292  | 1 |
| VTA1      | -0.0652924 | 1 |
| STX3      | -0.071894  | 1 |
| CCL23     | 0.0428862  | 1 |
| PRPF18    | 0.0491497  | 1 |
| AP1S3     | -0.060105  | 1 |
| FNDC3B    | 0.0088148  | 1 |
| FAM32A    | -0.0081232 | 1 |
| BIRC6     | 0.0339651  | 1 |
| ZNF8      | 0.0428421  | 1 |
| PPP1R15B  | -0.0736276 | 1 |
| AK3       | 0.0687867  | 1 |
| FASN      | 0.0674781  | 1 |
| ZNF331    | 0.0328062  | 1 |
| ABHD17C   | 0.019338   | 1 |
| LUC7L2    | -0.1078254 | 1 |
| MIS12     | 0.0241587  | 1 |
| EYA3      | -0.0807411 | 1 |
| FKBP5     | -0.0368333 | 1 |
| NCOA2     | 0.0267031  | 1 |
| DHRS1     | -0.0471819 | 1 |
| ICE1      | -0.0392379 | 1 |

|            |            |   |
|------------|------------|---|
| KIF3B      | -0.0623391 | 1 |
| SLC1A5     | -0.1129283 | 1 |
| SMARCAL1   | 0.0757903  | 1 |
| KATNB1     | -0.0555214 | 1 |
| LY86       | 0.0541089  | 1 |
| LANCL1     | 0.0243662  | 1 |
| SLC38A5    | 0.0389136  | 1 |
| STAT6      | -0.008142  | 1 |
| ZNF160     | -0.1131287 | 1 |
| FYCO1      | 0.0401904  | 1 |
| VASH1      | -0.0610891 | 1 |
| IFT80      | 0.0216363  | 1 |
| AL391069.2 | 0.0497447  | 1 |
| MBTD1      | 0.110742   | 1 |
| PPARA      | 0.052317   | 1 |
| ADH5       | 0.1268817  | 1 |
| PREB       | 0.0382067  | 1 |
| TMEM170A   | -0.0486582 | 1 |
| ELOF1      | -0.0802887 | 1 |
| C2CD5      | 0.0211311  | 1 |
| SMYD3      | 0.157457   | 1 |
| ATG4A      | 0.0264447  | 1 |
| AZIN1      | -0.0741707 | 1 |
| NEMP1      | 0.0553786  | 1 |
| ZNF675     | 0.0764119  | 1 |
| MSANTD3    | 0.0215153  | 1 |
| ZNF317     | -0.0024802 | 1 |
| PPP1CA     | -0.0598414 | 1 |
| KIAA1143   | 0.0924068  | 1 |
| QTRT2      | -0.0394787 | 1 |
| ATRIP      | 0.0280618  | 1 |
| PTPN18     | 0.1049843  | 1 |
| FBXO46     | 0.0125566  | 1 |
| SEC11A     | -0.0730804 | 1 |
| PROSER3    | -0.0440058 | 1 |
| ZNF764     | 0.0147434  | 1 |
| HPS5       | -0.0124377 | 1 |
| KARS       | 0.1040927  | 1 |
| CREB3L2    | 0.0287229  | 1 |
| MYDGF      | 0.0502231  | 1 |
| EXOC6      | 0.0640475  | 1 |
| ZNF791     | -0.013254  | 1 |
| BLZF1      | -0.0724022 | 1 |
| ZNF529     | 0.0678731  | 1 |
| ZSCAN9     | 0.0148182  | 1 |
| ILVBL      | 0.0395632  | 1 |
| SETD9      | 0.0389167  | 1 |
| ATP5F1C    | 0.1069666  | 1 |
| CYBC1      | 0.0469996  | 1 |
| POP4       | -0.0352857 | 1 |

|            |            |   |
|------------|------------|---|
| TOP3B      | 0.0022085  | 1 |
| HUS1       | -0.0485569 | 1 |
| SOCS1      | -0.0068649 | 1 |
| ERLIN2     | 0.0749459  | 1 |
| COG5       | 0.0755005  | 1 |
| UBR2       | 0.058663   | 1 |
| NBR1       | 0.0920522  | 1 |
| TAF5       | 0.0282992  | 1 |
| UCKL1      | -0.0697039 | 1 |
| SLC25A28   | 0.0293156  | 1 |
| CLUH       | 0.0342257  | 1 |
| CNOT10     | 0.0034878  | 1 |
| PBRM1      | -0.0358037 | 1 |
| HPS1       | 0.0463744  | 1 |
| RRAGD      | 0.0351254  | 1 |
| AL590764.1 | 0.0502926  | 1 |
| ZNF460     | 0.0349181  | 1 |
| SHQ1       | 0.0928059  | 1 |
| LSM7       | 0.0955233  | 1 |
| USP16      | -0.1476003 | 1 |
| USP7       | -0.0582053 | 1 |
| PAIP1      | -0.0106888 | 1 |
| FAM168B    | -0.1005089 | 1 |
| ZDHHC6     | -0.0105136 | 1 |
| RALB       | 0.0056182  | 1 |
| INO80E     | 0.0042975  | 1 |
| TRAPPC6B   | -0.0799274 | 1 |
| AHCY       | 0.0330953  | 1 |
| MAF1       | -0.0735818 | 1 |
| PDPR       | 0.0279286  | 1 |
| NBPF1      | 0.010415   | 1 |
| NFKBIL1    | 0.0500428  | 1 |
| SCAF4      | -0.0826296 | 1 |
| PBX2       | -0.0015074 | 1 |
| SNX16      | 0.0390304  | 1 |
| DUSP5      | -0.0960006 | 1 |
| GTF2A1     | 0.058777   | 1 |
| CDK5       | 0.0384839  | 1 |
| EZH1       | -0.0070982 | 1 |
| LCT        | -0.0399278 | 1 |
| SLC52A2    | -0.017262  | 1 |
| ISG15      | -0.0771426 | 1 |
| U2AF1      | 0.0064133  | 1 |
| PILRB      | 0.009661   | 1 |
| CEP85      | 0.0376003  | 1 |
| INPPL1     | -0.0268701 | 1 |
| METTL15    | 0.0493224  | 1 |
| PDE6D      | 0.0306781  | 1 |
| MED17      | -0.0217274 | 1 |
| MINDY2     | -0.1159725 | 1 |

|            |            |   |
|------------|------------|---|
| NUP88      | 0.0331181  | 1 |
| TRIM35     | -0.0479606 | 1 |
| BOLA1      | 0.0699665  | 1 |
| LINC00641  | 0.0368412  | 1 |
| MFF        | 0.0724749  | 1 |
| AC006504.5 | 0.0377881  | 1 |
| BCL2L11    | -0.0251865 | 1 |
| ADA        | 0.0874138  | 1 |
| L3MBTL1    | 0.0543773  | 1 |
| QRICH1     | -0.0653076 | 1 |
| CRBN       | -0.0419007 | 1 |
| HNRNPH2    | -0.1319389 | 1 |
| GHITM      | -0.0018667 | 1 |
| TBC1D1     | 0.0468552  | 1 |
| USP51      | 0.0663628  | 1 |
| TPCN2      | -0.0481469 | 1 |
| LYRM2      | 0.0497922  | 1 |
| SP1        | 0.0099525  | 1 |
| ACBD5      | -0.0086809 | 1 |
| HTATSF1    | -0.0378095 | 1 |
| AL118516.1 | -0.0868079 | 1 |
| NRBF2      | 0.0503933  | 1 |
| RSU1       | 0.0527133  | 1 |
| ZNF667-AS1 | -0.0522656 | 1 |
| LMO2       | -0.0822279 | 1 |
| FASTK      | -0.0412848 | 1 |
| AGAP3      | -0.0517841 | 1 |
| GCLM       | -0.0208866 | 1 |
| CLDN10     | 0.0576402  | 1 |
| METTL16    | 0.0095661  | 1 |
| PUS1       | 0.0770891  | 1 |
| MINDY1     | -0.0918112 | 1 |
| SLC66A2    | -0.09371   | 1 |
| PEX7       | 0.0367931  | 1 |
| CYB561     | -0.0887209 | 1 |
| ADPRM      | 0.0807063  | 1 |
| MMS22L     | 0.059843   | 1 |
| ZCCHC17    | 0.0257612  | 1 |
| EI24       | -0.0233471 | 1 |
| REEP3      | 0.086142   | 1 |
| RASAL2     | 0.0549062  | 1 |
| MFSD4B     | 0.0567783  | 1 |
| COMMD1     | 0.0279511  | 1 |
| TMEM165    | 0.0531376  | 1 |
| AP1G2      | -0.0609543 | 1 |
| GSTO1      | 0.071607   | 1 |
| RNF144A    | 0.0785624  | 1 |
| PFDN5      | 0.115979   | 1 |
| RAP2B      | -0.0374542 | 1 |
| BUB1       | 0.045947   | 1 |



|            |            |   |
|------------|------------|---|
| GOLGA4     | -0.0429032 | 1 |
| FAM20B     | 0.0597917  | 1 |
| MED21      | 0.0497412  | 1 |
| ANO10      | 0.0032832  | 1 |
| PPP2R3B    | 0.0614379  | 1 |
| TMEM184C   | 0.0282381  | 1 |
| CRLF3      | 0.023764   | 1 |
| S100B      | 0.0346939  | 1 |
| USP30      | -0.0425581 | 1 |
| ZNF627     | -0.0578021 | 1 |
| PSMD10     | 0.0220802  | 1 |
| NFATC2IP   | -0.0756808 | 1 |
| PIN1       | -0.0846816 | 1 |
| IARS2      | 0.0417653  | 1 |
| TRIM37     | 0.0078228  | 1 |
| STXBP3     | 0.0813078  | 1 |
| SELENOI    | -0.0295773 | 1 |
| NANS       | 0.0198211  | 1 |
| PDE12      | 0.03652    | 1 |
| RGS10      | -0.0655422 | 1 |
| IFNAR1     | -0.0690728 | 1 |
| OGT        | -0.1060303 | 1 |
| MIEN1      | 0.0570273  | 1 |
| RAP2C      | -0.1319907 | 1 |
| TBC1D23    | -0.0888513 | 1 |
| ZNF721     | 0.1209557  | 1 |
| FH         | 0.0822847  | 1 |
| ACP6       | 0.0607734  | 1 |
| BTG2       | 0.1934132  | 1 |
| PHACTR4    | 0.0387391  | 1 |
| LYRM9      | 0.0349935  | 1 |
| GPSM1      | -0.0688654 | 1 |
| DNHD1      | 0.0287339  | 1 |
| TAB3       | -0.051909  | 1 |
| MPHOSPH1   | 0.1196691  | 1 |
| CMTR1      | 0.0110705  | 1 |
| ACAD10     | 0.0535039  | 1 |
| CARD8      | 0.1168261  | 1 |
| CLCN7      | 0.0875318  | 1 |
| ITPKB      | -0.0435126 | 1 |
| AC016727.1 | 0.0274791  | 1 |
| RAB13      | 0.1230702  | 1 |
| NUDT8      | 0.0534513  | 1 |
| BRWD3      | 0.0505544  | 1 |
| ADIPOR1    | -0.1037842 | 1 |
| EPHB6      | 0.0794568  | 1 |
| CHKB       | -0.0282423 | 1 |
| AC004148.1 | 0.0346656  | 1 |
| PIK3R4     | -0.050003  | 1 |
| LRMP       | 0.0507099  | 1 |

|            |            |   |
|------------|------------|---|
| DARS2      | 0.0480023  | 1 |
| IFT81      | 0.0222918  | 1 |
| COX14      | 0.0543095  | 1 |
| HDGFL2     | -0.0074047 | 1 |
| BPGM       | 0.0043724  | 1 |
| FOXJ3      | -0.0537636 | 1 |
| ZNF577     | 0.0558039  | 1 |
| NFATC3     | 0.0411179  | 1 |
| LINC00685  | -0.0257058 | 1 |
| BRAT1      | 0.0309426  | 1 |
| HSPB1      | -0.0653913 | 1 |
| CDK2AP2    | -0.0918783 | 1 |
| SLC25A29   | -0.0816495 | 1 |
| ALG5       | -0.0114875 | 1 |
| TIMM10     | 0.0625425  | 1 |
| NELFE      | -0.0091675 | 1 |
| MRPS2      | 0.0878596  | 1 |
| DNAJC13    | 0.1094708  | 1 |
| RBBP5      | 0.0032949  | 1 |
| ZNF224     | 0.0388812  | 1 |
| SP100      | -0.0825489 | 1 |
| DDT        | -0.0850372 | 1 |
| ZNF562     | 0.0140232  | 1 |
| LDLRAP1    | 0.0099515  | 1 |
| ACAP2      | -0.0574958 | 1 |
| ZBTB24     | 0.0375822  | 1 |
| SLC35E2B   | -0.0487352 | 1 |
| GPAM       | 0.0490104  | 1 |
| SIVA1      | -0.0215954 | 1 |
| RTN4R      | -0.1446747 | 1 |
| ASH1L-AS1  | -0.0266501 | 1 |
| FUT11      | -0.0041372 | 1 |
| AC110285.2 | -0.004556  | 1 |
| VCPKMT     | -0.0703955 | 1 |
| SH3BGRL    | 0.0957359  | 1 |
| BIVM       | 0.0522809  | 1 |
| TCP11L1    | 0.0039746  | 1 |
| FAM81B     | -0.0425019 | 1 |
| BCL2L13    | -0.0986755 | 1 |
| CCZ1       | -0.1655628 | 1 |
| PIK3CG     | 0.0187402  | 1 |
| CDIPT      | 0.0375763  | 1 |
| OTULIN     | 0.078852   | 1 |
| TUFM       | -0.0675911 | 1 |
| TAF5L      | -0.0745031 | 1 |
| WDR26      | -0.1259277 | 1 |
| BEX4       | -0.1143881 | 1 |
| POLR2A     | -0.0950376 | 1 |
| NSD2       | -0.0811611 | 1 |
| SERPINI1   | 0.0427805  | 1 |

|                    |            |   |
|--------------------|------------|---|
| MAML1              | -0.0009247 | 1 |
| GPR108             | -0.0241264 | 1 |
| CYB561D1           | 0.029721   | 1 |
| COG1               | -0.0616195 | 1 |
| HSD17B10           | -0.0520474 | 1 |
| SYNRG              | 0.0546483  | 1 |
| MSL3               | 0.0076676  | 1 |
| AL391121.1         | -0.0560196 | 1 |
| PELO               | -0.0195542 | 1 |
| ZNF185             | 0.0318349  | 1 |
| SCAP               | 0.0648177  | 1 |
| UBE2V1             | 0.0861722  | 1 |
| ZNF143             | 0.056896   | 1 |
| BRMS1L             | 0.0344244  | 1 |
| GMNN               | 0.0086743  | 1 |
| KPNB1              | 0.1653069  | 1 |
| ATAD3B             | 0.0004767  | 1 |
| SELENOS            | -0.1462299 | 1 |
| PDCL               | 0.0435477  | 1 |
| STON2              | 0.1277435  | 1 |
| VOPP1              | -0.013692  | 1 |
| AC009120.2         | 0.0657122  | 1 |
| ERCC8              | 0.01169    | 1 |
| CXCL3              | 0.0910228  | 1 |
| WDR37              | -0.0577401 | 1 |
| MAPK9              | 0.0754139  | 1 |
| RUNDC1             | -0.0235497 | 1 |
| SMUG1              | 0.0362504  | 1 |
| PFDN1              | -0.1067538 | 1 |
| KLHDC3             | 0.0934564  | 1 |
| BLOC1S1            | 0.0693179  | 1 |
| EPB41L4A- <i>A</i> | 0.1238619  | 1 |
| SDHC               | 0.076278   | 1 |
| PEX10              | 0.0095856  | 1 |
| DNAJC7             | -0.0787721 | 1 |
| PIP5K1C            | -0.0387543 | 1 |
| POP7               | 0.0266818  | 1 |
| SLC23A2            | 0.0119045  | 1 |
| HLA-DQB1           | -0.0423872 | 1 |
| EXOG               | 0.0524338  | 1 |
| BRK1               | -0.1611488 | 1 |
| CCDC43             | 0.0064068  | 1 |
| VAMP7              | -0.0544525 | 1 |
| MACC1              | 0.0387978  | 1 |
| RAP1GDS1           | 0.003306   | 1 |
| ZNF273             | 0.0329142  | 1 |
| ETAA1              | 0.084794   | 1 |
| AC087239.1         | 0.0260361  | 1 |
| GDE1               | 0.0303608  | 1 |
| RTCA               | -0.084815  | 1 |

|            |            |   |
|------------|------------|---|
| ARHGAP26   | 0.0305281  | 1 |
| TRAPPC2    | 0.0239252  | 1 |
| AZI2       | -0.0136215 | 1 |
| TXN2       | 0.0636395  | 1 |
| RAD52      | 0.0281615  | 1 |
| CBFB       | -0.0566364 | 1 |
| LZTFL1     | -0.0599145 | 1 |
| THBS3      | -0.0747724 | 1 |
| RBM43      | 0.0920091  | 1 |
| ITGB2      | -0.1426896 | 1 |
| SS18L1     | -0.009381  | 1 |
| DDX6       | -0.0804153 | 1 |
| MROH7      | 0.0256519  | 1 |
| AC008074.2 | 0.0114017  | 1 |
| HIST1H2BE  | 0.0222389  | 1 |
| TTC9C      | -0.0445967 | 1 |
| HLA-DRB5   | -0.1281011 | 1 |
| HOMEZ      | 0.0302078  | 1 |
| HEATR5A    | 0.0198738  | 1 |
| MTREX      | 0.0555604  | 1 |
| SECISBP2   | -0.0743938 | 1 |
| ARL1       | 0.0409768  | 1 |
| ZNF69      | 0.0443565  | 1 |
| SLC39A1    | -0.0734733 | 1 |
| PTCD1      | 0.0396928  | 1 |
| RGL2       | -0.0658855 | 1 |
| WDR18      | 0.044149   | 1 |
| MGAT4B     | -0.0766807 | 1 |
| DTNB       | 0.0397232  | 1 |
| MARCH7     | 0.0045241  | 1 |
| LINC01003  | -0.092874  | 1 |
| ZNF506     | 0.0780129  | 1 |
| MYD88      | 0.0253243  | 1 |
| MT-CO1     | 0.0570233  | 1 |
| NECAP1     | -0.0119932 | 1 |
| SEC61A2    | -0.0819424 | 1 |
| MRRF       | 0.0625064  | 1 |
| FMR1       | -0.0395804 | 1 |
| CHCHD4     | 0.0379683  | 1 |
| NLRC5      | 0.0114996  | 1 |
| CRACR2A    | 0.0334734  | 1 |
| RPP30      | 0.0405414  | 1 |
| MICALL2    | -0.0486428 | 1 |
| HLA-DPA1   | -0.127073  | 1 |
| LPCAT1     | 0.0515671  | 1 |
| SIRT5      | 0.0627139  | 1 |
| EP400      | 0.0950034  | 1 |
| TBRG4      | 0.0040691  | 1 |
| TRBVB      | -0.0526252 | 1 |
| ZNF277     | 0.0524645  | 1 |

|            |            |   |
|------------|------------|---|
| AL158152.1 | -0.023893  | 1 |
| ARNT       | 0.0143615  | 1 |
| CCDC130    | -0.0044931 | 1 |
| MRPL2      | 0.040265   | 1 |
| ASB6       | -0.0808323 | 1 |
| SUMF1      | 0.0612664  | 1 |
| C1orf35    | -0.0652417 | 1 |
| ADAM15     | -0.1054206 | 1 |
| SLK        | -0.0666946 | 1 |
| SNRK       | -0.0764563 | 1 |
| ZNHIT3     | 0.0115035  | 1 |
| ACOX1      | 0.032462   | 1 |
| NOP14-AS1  | -0.0519548 | 1 |
| LNCAROD    | -0.0105839 | 1 |
| INTS5      | -0.001505  | 1 |
| RNASET2    | 0.1282909  | 1 |
| SLC35F5    | -0.0578475 | 1 |
| GALNT11    | 0.1023953  | 1 |
| RXRB       | 0.0215997  | 1 |
| CCDC189    | -0.031716  | 1 |
| C18orf25   | -0.1067737 | 1 |
| AUTS2      | 0.0404576  | 1 |
| MRPS11     | 0.1164627  | 1 |
| AC022098.1 | 0.0479441  | 1 |
| C4orf46    | 0.0371177  | 1 |
| ISY1       | 0.0328825  | 1 |
| SBNO1      | 0.0768347  | 1 |
| MBNL2      | 0.037844   | 1 |
| VPS33B     | -0.0399258 | 1 |
| TTC31      | 0.0571295  | 1 |
| POLR2D     | 0.0744783  | 1 |
| OTUD5      | -0.0770963 | 1 |
| SETD1A     | -0.0028769 | 1 |
| PATL1      | -0.0790664 | 1 |
| FBXW2      | -0.0680876 | 1 |
| PI4K2B     | -0.0575737 | 1 |
| SAAL1      | 0.0157974  | 1 |
| UFL1       | -0.0829054 | 1 |
| NCBP1      | 0.0577123  | 1 |
| AC107464.3 | -0.0156104 | 1 |
| TMEM248    | -0.0640494 | 1 |
| KCTD18     | 0.0297976  | 1 |
| CEP70      | 0.0677863  | 1 |
| HEXA       | -0.0419312 | 1 |
| MIR181A1HC | 0.0015779  | 1 |
| PRDM4      | -0.0326233 | 1 |
| TCIRG1     | -0.0996504 | 1 |
| ADAM9      | -0.0487145 | 1 |
| MYPOP      | 0.0396258  | 1 |
| ZNF765     | 0.0597879  | 1 |

|            |            |   |
|------------|------------|---|
| SLC25A43   | 0.0438233  | 1 |
| LINC01089  | 0.0416595  | 1 |
| PIK3CB     | 0.0605966  | 1 |
| HSBP1      | 0.0158741  | 1 |
| ERAP1      | 0.0667707  | 1 |
| SSBP2      | 0.1162405  | 1 |
| TRIM68     | 0.0410372  | 1 |
| CUL2       | -0.0802264 | 1 |
| CHUK       | -0.0082849 | 1 |
| MTMR9      | -0.111753  | 1 |
| JPT2       | -0.0209936 | 1 |
| UMPS       | 0.0541441  | 1 |
| NOM1       | 0.0609701  | 1 |
| WDR55      | -0.024679  | 1 |
| CEP89      | -0.0526518 | 1 |
| TSFM       | 0.0656129  | 1 |
| SEC11C     | -0.0263479 | 1 |
| ATP6V1H    | -0.067209  | 1 |
| KIAA1191   | -0.0076662 | 1 |
| MTM1       | 0.0592899  | 1 |
| TSR3       | -0.0642927 | 1 |
| HPS6       | -0.0891681 | 1 |
| CHST7      | -0.0492199 | 1 |
| PRDX6      | -0.0676936 | 1 |
| AP5Z1      | -0.0812001 | 1 |
| FTO        | 0.0596879  | 1 |
| AP002360.1 | 0.062493   | 1 |
| SRPK1      | 0.1033519  | 1 |
| CLIC2      | 0.1096055  | 1 |
| TMTC4      | 0.0175085  | 1 |
| ATXN7      | 0.049923   | 1 |
| MTERF3     | -0.0292726 | 1 |
| AFF1       | -0.0416881 | 1 |
| RNF170     | 0.0190912  | 1 |
| ATP6V0A1   | 0.0067026  | 1 |
| HYI        | 0.0355512  | 1 |
| PYCARD-AS  | -0.0400374 | 1 |
| MYOF       | -0.014287  | 1 |
| RNPS1      | -0.1028914 | 1 |
| ZNF347     | 0.0455668  | 1 |
| EXOSC4     | -0.0269309 | 1 |
| PARP9      | 0.0644321  | 1 |
| FNIP2      | -0.0781276 | 1 |
| TOP1       | -0.0411638 | 1 |
| PSME1      | -0.0412788 | 1 |
| SOAT1      | 0.0110665  | 1 |
| PRADC1     | 0.0373221  | 1 |
| SACS       | 0.0133821  | 1 |
| RANBP3     | -0.0417435 | 1 |
| STMP1      | 0.1168464  | 1 |

|            |            |   |
|------------|------------|---|
| TSTA3      | 0.0011789  | 1 |
| FAHD1      | 0.0640864  | 1 |
| WRAP53     | 0.0161484  | 1 |
| MAP3K13    | -0.0691781 | 1 |
| TOR3A      | 0.0017928  | 1 |
| WDR76      | 0.032448   | 1 |
| HADHB      | 0.0570694  | 1 |
| ZNF790     | 0.0209719  | 1 |
| PPP3CB     | 0.0403432  | 1 |
| STX5       | -0.0978524 | 1 |
| NCSTN      | 0.0387495  | 1 |
| F8A1       | 0.0346535  | 1 |
| AC139887.2 | -0.1202877 | 1 |
| USPL1      | 0.0434874  | 1 |
| GADD45GIP  | -0.0090726 | 1 |
| TXNIP      | 0.0070325  | 1 |
| PURA       | 0.1019313  | 1 |
| BCORL1     | 0.0165961  | 1 |
| BET1       | 0.0476237  | 1 |
| DUSP22     | -0.023857  | 1 |
| RWDD2B     | 0.0568155  | 1 |
| GEMIN8     | -0.0164096 | 1 |
| AC064807.1 | 0.0695387  | 1 |
| MFSD5      | -0.0658924 | 1 |
| DDB2       | -0.0906556 | 1 |
| FLCN       | -0.065856  | 1 |
| ADGRE1     | 0.0462868  | 1 |
| AP000766.1 | 0.0321417  | 1 |
| MIF4GD     | 0.0665111  | 1 |
| TRIM26     | -0.0605879 | 1 |
| ZSCAN16-A  | 0.1108064  | 1 |
| ZNF418     | 0.0128752  | 1 |
| SBF1       | -0.0438891 | 1 |
| MRPL43     | 0.0478065  | 1 |
| TRMT2B     | 0.0265276  | 1 |
| DAP3       | 0.0786195  | 1 |
| INO80B     | -0.0030939 | 1 |
| C5orf22    | 0.0241547  | 1 |
| UBQLN4     | 0.0340924  | 1 |
| NUP210     | 0.0779077  | 1 |
| PRIM2      | 0.0293925  | 1 |
| ARL5B      | 0.0623392  | 1 |
| BCDIN3D    | 0.0342841  | 1 |
| ADCK2      | 0.0219198  | 1 |
| VAMP1      | -0.0649206 | 1 |
| SIRT3      | -0.0332614 | 1 |
| ABCF3      | -0.0239372 | 1 |
| ZNF662     | 0.0449884  | 1 |
| CMAS       | 0.0816307  | 1 |
| DDX21      | 0.1719197  | 1 |

|           |            |   |
|-----------|------------|---|
| TRAPPC10  | -0.0820978 | 1 |
| CDK2      | 0.0167923  | 1 |
| WBP2      | -0.0790509 | 1 |
| DNMT3B    | -0.0341167 | 1 |
| TEP1      | -0.0433675 | 1 |
| GGA3      | -0.0159816 | 1 |
| TMED4     | -0.0237823 | 1 |
| NUP188    | 0.0615055  | 1 |
| PRR3      | 0.0223357  | 1 |
| LINC02384 | -0.0578653 | 1 |
| ZNF92     | 0.0936009  | 1 |
| FCHO2     | 0.0280928  | 1 |
| LGALS3    | -0.0444322 | 1 |
| WDFY1     | 0.0123352  | 1 |
| OXSM      | 0.016157   | 1 |
| GPR107    | -0.0913149 | 1 |
| TNPO2     | 0.0123643  | 1 |
| PRORP     | -0.0663428 | 1 |
| PPIL1     | 0.0636918  | 1 |
| MEAK7     | -0.0294262 | 1 |
| GET3      | 0.0059484  | 1 |
| CRTC3     | -0.0881752 | 1 |
| ZNF587    | 0.0307929  | 1 |
| SLC17A9   | 0.0325427  | 1 |
| NOL11     | 0.0351926  | 1 |
| AP3D1     | 0.0273958  | 1 |
| VAMP4     | 0.0658531  | 1 |
| UNC45A    | -0.0161149 | 1 |
| NCOA4     | 0.0677501  | 1 |
| AGAP9     | -0.0115337 | 1 |
| MAD1L1    | 0.0609427  | 1 |
| EEF2      | 0.1042356  | 1 |
| PKN1      | -0.0223883 | 1 |
| TDG       | 0.0597058  | 1 |
| THAP7     | 0.0641263  | 1 |
| CTTNBP2NL | -0.0491238 | 1 |
| SRSF10    | 0.0857448  | 1 |
| SPG7      | -0.0033482 | 1 |
| RBMX2     | 0.0724408  | 1 |
| ZDHHC24   | 0.05       | 1 |
| GOLGA1    | 0.0535976  | 1 |
| UCN       | 0.0285262  | 1 |
| LRRC40    | -0.0543298 | 1 |
| SHC1      | -0.0281839 | 1 |
| KAT7      | 0.0258255  | 1 |
| BTBD1     | 0.0136509  | 1 |
| ZNF646    | 0.0157215  | 1 |
| PIK3C2A   | -0.0146991 | 1 |
| ENTPD7    | -0.0094714 | 1 |
| PARVB     | -0.0586354 | 1 |



|           |            |   |
|-----------|------------|---|
| KBTBD6    | 0.0274813  | 1 |
| RCC1L     | 0.0147862  | 1 |
| WARS      | -0.1028367 | 1 |
| CCDC112   | 0.0581048  | 1 |
| UHRF1BP1  | -0.018249  | 1 |
| KLHL36    | -0.0664209 | 1 |
| FBXO41    | 0.0424882  | 1 |
| MDC1      | 0.020017   | 1 |
| OSBPL9    | -0.0643698 | 1 |
| NAA35     | -0.0678871 | 1 |
| EID2      | 0.0305954  | 1 |
| EIF6      | -0.0339747 | 1 |
| TRAPPC2B  | 0.012907   | 1 |
| RNF14     | -0.0519281 | 1 |
| SBF2      | 0.0033833  | 1 |
| SLCO3A1   | 0.0236689  | 1 |
| ICAM2     | -0.0533466 | 1 |
| ZNF761    | 0.0647632  | 1 |
| DAPK1     | 0.1050708  | 1 |
| FBXW9     | 0.0428841  | 1 |
| TSPAN32   | 0.0206184  | 1 |
| H2AFV     | -0.1211644 | 1 |
| HIF1AN    | 0.0004333  | 1 |
| CAMKMT    | 0.0386134  | 1 |
| TXLNA     | 0.0840902  | 1 |
| PRSS21    | 0.0639296  | 1 |
| CRIP1     | 0.0226422  | 1 |
| SMPDL3B   | 0.0530052  | 1 |
| UCHL3     | -0.0162859 | 1 |
| ISYNA1    | -0.0562386 | 1 |
| ZBTB17    | -0.0529548 | 1 |
| DNAL4     | -0.0306476 | 1 |
| HMGXB3    | 0.0787899  | 1 |
| FBXO33    | -0.1016404 | 1 |
| DGAT1     | 0.0230416  | 1 |
| MZF1      | 0.0501325  | 1 |
| SCNM1     | -0.0280564 | 1 |
| PUM2      | 0.0188335  | 1 |
| LINC01678 | 0.0373467  | 1 |
| UBLCP1    | -0.0229008 | 1 |
| C19orf81  | 0.0288308  | 1 |
| ZNF337    | -0.0074723 | 1 |
| APOL3     | -0.0175878 | 1 |
| INPP5F    | -0.0659577 | 1 |
| ZNF292    | -0.1167071 | 1 |
| POLA2     | 0.0239024  | 1 |
| CASC3     | 0.0027973  | 1 |
| TMEM183A  | -0.0080475 | 1 |
| RABL2A    | 0.0041487  | 1 |
| GSTCD     | 0.0454971  | 1 |

|            |            |   |
|------------|------------|---|
| RNPEP      | -0.054184  | 1 |
| C2orf68    | -0.0376916 | 1 |
| SUV39H2    | 0.0337279  | 1 |
| ZNF274     | -0.0677117 | 1 |
| TRIM52     | 0.0623673  | 1 |
| ETHE1      | -0.0825225 | 1 |
| PDZD11     | 0.0116946  | 1 |
| ZNF805     | -0.0145273 | 1 |
| RBMX       | 0.0682841  | 1 |
| RAB20      | -0.0649669 | 1 |
| ZNF654     | -0.0163928 | 1 |
| RPRD1A     | -0.005171  | 1 |
| PCNX1      | -0.0097862 | 1 |
| SUGP2      | -0.0112097 | 1 |
| LYRM1      | 0.1258824  | 1 |
| PARP15     | 0.0328776  | 1 |
| MED11      | 0.0412697  | 1 |
| SEL1L      | -0.0746034 | 1 |
| B4GALT7    | -0.0243408 | 1 |
| ZNF724     | 0.0706854  | 1 |
| SCOC       | 0.0200265  | 1 |
| RTCB       | -0.0069601 | 1 |
| MORN2      | 0.0109293  | 1 |
| SF1        | -0.1477764 | 1 |
| MGME1      | 0.1152115  | 1 |
| PET100     | -0.0857853 | 1 |
| MRPS16     | 0.0981361  | 1 |
| SPPL2B     | -0.0028223 | 1 |
| FAM3A      | -0.0242366 | 1 |
| PLPP5      | 0.0591916  | 1 |
| AC010623.1 | 0.0194156  | 1 |
| APEH       | 0.0929513  | 1 |
| VPS45      | 0.0456789  | 1 |
| SREK1IP1   | 0.0229422  | 1 |
| RBM26      | 0.1140421  | 1 |
| GABPB1-IT1 | 0.0101969  | 1 |
| CDC40      | -0.0951931 | 1 |
| NDUFA10    | 0.0692608  | 1 |
| NUMA1      | 0.0783483  | 1 |
| ZNF511     | -0.0346458 | 1 |
| RABEP1     | 0.0704205  | 1 |
| SEMA4D     | 0.0779357  | 1 |
| FHOD1      | -0.0871544 | 1 |
| ARHGAP25   | 0.100019   | 1 |
| PRKAG1     | 0.022137   | 1 |
| C6orf89    | 0.0275494  | 1 |
| PEBP1      | 0.0999531  | 1 |
| KXD1       | 0.0267152  | 1 |
| OFD1       | 0.0674671  | 1 |
| MATR3.1    | 0.046552   | 1 |

|            |            |   |
|------------|------------|---|
| ZNF84      | 0.103331   | 1 |
| NHEJ1      | 0.022113   | 1 |
| PRR13      | 0.0744089  | 1 |
| TRMT6      | -0.0204031 | 1 |
| PSMD1      | 0.0819928  | 1 |
| CCDC22     | 0.0284028  | 1 |
| NDUFA1     | 0.0940784  | 1 |
| GOLGA3     | 0.0181211  | 1 |
| DR1        | -0.0160128 | 1 |
| NOL9       | 0.0147026  | 1 |
| GPX7       | 0.0928769  | 1 |
| BACH1      | -0.0314483 | 1 |
| UBR4       | 0.0072375  | 1 |
| GOLGA8Q    | 0.0544786  | 1 |
| UNC93B1    | 0.0244511  | 1 |
| PPP1R3D    | 0.0831194  | 1 |
| SLC30A5    | 0.013467   | 1 |
| SACM1L     | 0.004861   | 1 |
| PIAS1      | -0.1280205 | 1 |
| ABCD3      | 0.0385014  | 1 |
| LYL1       | 0.0517954  | 1 |
| AMZ2       | 0.0366331  | 1 |
| DNAJC9     | 0.0510849  | 1 |
| CRCP       | 0.0559852  | 1 |
| KLHL15     | 0.0405416  | 1 |
| SFXN5      | 0.0647049  | 1 |
| DDX50      | 0.0901345  | 1 |
| CSKMT      | 0.0266786  | 1 |
| ZNF789     | -0.0544099 | 1 |
| PTOV1      | -0.102071  | 1 |
| PEX14      | -0.0241075 | 1 |
| AC006141.1 | 0.064533   | 1 |
| MRPL44     | -0.0137327 | 1 |
| ZBED4      | -0.072723  | 1 |
| MPHOSPH6   | 0.0114201  | 1 |
| PRKCB      | 0.0874448  | 1 |
| RP9        | 0.046163   | 1 |
| GSTK1      | -0.1065501 | 1 |
| SLC38A2    | -0.0772733 | 1 |
| C9orf85    | 0.0314209  | 1 |
| GMDS       | 0.0014107  | 1 |
| PHKA2      | 0.0384384  | 1 |
| TMEM65     | 0.0438109  | 1 |
| MED14      | -0.0461436 | 1 |
| MALSU1     | 0.017584   | 1 |
| ZBTB33     | 0.0583483  | 1 |
| SLC1A4     | -0.0774927 | 1 |
| ADAMTSL4   | -0.0820404 | 1 |
| RAD9A      | -0.0464833 | 1 |
| IMPDH1     | 0.0675669  | 1 |

|            |            |   |
|------------|------------|---|
| GOLPH3     | -0.061915  | 1 |
| ARAP1      | 0.0330822  | 1 |
| HOXA4      | 0.0193272  | 1 |
| GPR89A     | 0.0227045  | 1 |
| ARHGEF9    | 0.0617361  | 1 |
| PSMD5      | -0.0175957 | 1 |
| TSTD2      | -0.0116155 | 1 |
| ZKSCAN3    | 0.0440389  | 1 |
| RPS3A      | 0.0586514  | 1 |
| PTGIR      | -0.1170098 | 1 |
| DRG2       | 0.0792415  | 1 |
| UVRAG      | 0.0619396  | 1 |
| MGAT4A     | -0.0142665 | 1 |
| ANKIB1     | 0.08964    | 1 |
| STT3A      | 0.0811098  | 1 |
| CRADD      | 0.0277712  | 1 |
| STK11IP    | -0.0132169 | 1 |
| MED6       | -0.1120869 | 1 |
| PPIG       | -0.0445519 | 1 |
| B3GAT3     | -0.0272777 | 1 |
| KDM1B      | 0.0614865  | 1 |
| HLA-DRA    | -0.0529323 | 1 |
| MSRB1      | 0.0047088  | 1 |
| TMEM167B   | -0.1156833 | 1 |
| STK38L     | -0.1464976 | 1 |
| CAND1      | -0.1285498 | 1 |
| GTF3C5     | -0.0544473 | 1 |
| AKT2       | -0.0442028 | 1 |
| SEC24C     | -0.0817203 | 1 |
| AKAP11     | 0.0711404  | 1 |
| MOSPD2     | 0.039296   | 1 |
| PSMD9      | -0.068208  | 1 |
| AP001816.1 | -0.054921  | 1 |
| TAOK2      | -0.0236438 | 1 |
| CES2       | 0.0544135  | 1 |
| RRP36      | -0.0830179 | 1 |
| TEX2       | 0.0198941  | 1 |
| SLC8B1     | -0.0183963 | 1 |
| GFPT1      | -0.0749639 | 1 |
| JHY        | -0.0317029 | 1 |
| PEX6       | 0.0488988  | 1 |
| COX5B      | -0.0747258 | 1 |
| SLC52A3    | 0.0246423  | 1 |
| HSF2       | -0.0540724 | 1 |
| SPSB2      | -0.0834291 | 1 |
| THAP4      | -0.0017691 | 1 |
| MPPE1      | 0.0438616  | 1 |
| ZMAT3      | 0.0458893  | 1 |
| PTPN7      | -0.0274355 | 1 |
| ZNF319     | -0.0291804 | 1 |

|            |            |   |
|------------|------------|---|
| CCDC88A    | 0.0177881  | 1 |
| DDX54      | 0.0474202  | 1 |
| FIP1L1     | -0.0773804 | 1 |
| GNE        | -0.0004136 | 1 |
| FEM1A      | 0.0225554  | 1 |
| CCDC92     | -0.0175603 | 1 |
| C5orf51    | 0.0197941  | 1 |
| COG4       | 0.0314976  | 1 |
| COPG2      | 0.0473117  | 1 |
| MBTPS1     | 0.1122939  | 1 |
| TFR2       | 0.0268176  | 1 |
| GTF2H2     | 0.0440091  | 1 |
| MTMR2      | -0.0288809 | 1 |
| SINHCAF    | -0.0782218 | 1 |
| FMO5       | 0.0385471  | 1 |
| LINC00513  | -0.0623441 | 1 |
| SNX30      | 0.0196476  | 1 |
| SUPT5H     | 0.0068479  | 1 |
| C8orf82    | 0.0432794  | 1 |
| SLC25A15   | 0.0093775  | 1 |
| AL049840.2 | -0.0655969 | 1 |
| PCNP       | -0.0983693 | 1 |
| PRR14      | -0.0881363 | 1 |
| MYNN       | -0.0459111 | 1 |
| DRG1       | -0.0112327 | 1 |
| Z95331.1   | -0.0444286 | 1 |
| NATD1      | 0.0097691  | 1 |
| YWHAE      | 0.0602891  | 1 |
| GTF2B      | -0.106452  | 1 |
| AC253572.2 | 0.1256556  | 1 |
| STAG1      | 0.0851273  | 1 |
| ZCCHC8     | -0.0087215 | 1 |
| FGFR1OP2   | 0.0985601  | 1 |
| LINC01122  | 0.0406716  | 1 |
| RAB3GAP2   | -0.057157  | 1 |
| ZNF830     | 0.142499   | 1 |
| MGMT       | 0.000525   | 1 |
| EFR3A      | -0.0659704 | 1 |
| ZDHHC13    | 0.0308739  | 1 |
| MRI1       | 0.06772    | 1 |
| TAF1B      | 0.0251314  | 1 |
| VPS35L     | 0.0627305  | 1 |
| ZNF581     | -0.0078307 | 1 |
| ILK        | -0.0048369 | 1 |
| GLMP       | 0.0254906  | 1 |
| ARFRP1     | -0.0418055 | 1 |
| USP32      | -0.013894  | 1 |
| KIAA0319L  | 0.0919267  | 1 |
| CYB5R1     | 0.0551578  | 1 |
| DCAF13     | 0.0820927  | 1 |

|            |            |   |
|------------|------------|---|
| WDR73      | -0.0673884 | 1 |
| IGBP1      | -0.020374  | 1 |
| MBOAT1     | -0.0635669 | 1 |
| TTL        | -0.0614859 | 1 |
| DDX19B     | -0.0667504 | 1 |
| PPIE       | 0.0830352  | 1 |
| ZNF316     | -0.041721  | 1 |
| TXNDC15    | 0.0326027  | 1 |
| TNFRSF25   | -0.0871104 | 1 |
| PRPF40B    | 0.0415539  | 1 |
| MDP1       | 0.0762293  | 1 |
| RNGTT      | 0.0227438  | 1 |
| SYNGR2     | -0.0444415 | 1 |
| ZNF148     | -0.067109  | 1 |
| SAMD9L     | 0.0081102  | 1 |
| POLR1C     | 0.0527917  | 1 |
| KLHL21     | -0.0284905 | 1 |
| AC002454.1 | 0.0765552  | 1 |
| UTP23      | 0.0850148  | 1 |
| ASCC1      | -0.0723447 | 1 |
| TMEM70     | 0.0135208  | 1 |
| AP1S2      | -0.0261122 | 1 |
| RNF31      | -0.0184519 | 1 |
| TMEM138    | -0.0103089 | 1 |
| PSD4       | -0.0128672 | 1 |
| CASP9      | 0.0031946  | 1 |
| DDX39B     | 0.0221769  | 1 |
| MVD        | -0.061925  | 1 |
| ZNF93      | 0.0396839  | 1 |
| APOBR      | -0.0422967 | 1 |
| SMU1       | 0.0080299  | 1 |
| PIAS2      | 0.0501561  | 1 |
| MAP3K5     | 0.0110745  | 1 |
| BIK        | -0.0012844 | 1 |
| EXOC4      | 0.0345763  | 1 |
| CEP19      | -0.007264  | 1 |
| TM2D1      | 0.0856855  | 1 |
| MED29      | -0.0336791 | 1 |
| KNSTRN     | 0.0303707  | 1 |
| DCLRE1C    | -0.0707846 | 1 |
| HDHD3      | 0.0177975  | 1 |
| UNKL       | -0.0432074 | 1 |
| ING2       | -0.0298542 | 1 |
| FBXW5      | -0.0477072 | 1 |
| PTDSS1     | 0.0247337  | 1 |
| RWDD4      | -0.0271032 | 1 |
| CHMP3      | -0.0894924 | 1 |
| AC010618.3 | 0.0656047  | 1 |
| SDHA       | -0.0510102 | 1 |
| TDRD7      | -0.0187006 | 1 |

|            |            |   |
|------------|------------|---|
| DPY19L3    | 0.0630958  | 1 |
| UBE2J2     | -0.0781734 | 1 |
| EEF1AKMT2  | 0.0196208  | 1 |
| HHEX       | 0.082524   | 1 |
| XPO4       | -0.0235374 | 1 |
| AL442125.1 | -0.0347934 | 1 |
| AMMECR1L   | -0.0643409 | 1 |
| RCC1       | 0.0356958  | 1 |
| LACC1      | -0.0236906 | 1 |
| CLUAP1     | 0.0046599  | 1 |
| ZDHHC23    | -0.0480549 | 1 |
| SPARC      | 0.1297031  | 1 |
| E2F6       | 0.0279185  | 1 |
| WDYHV1     | 0.0010244  | 1 |
| COX8A      | -0.0499086 | 1 |
| CTSB       | -0.0590655 | 1 |
| AL022311.1 | 0.0096903  | 1 |
| UBA7       | -0.0717483 | 1 |
| FUCA1      | 0.0490083  | 1 |
| IKBIP      | 0.085366   | 1 |
| PPM1M      | -0.0192506 | 1 |
| MBNL1      | -0.1209255 | 1 |
| KIAA1522   | -0.0776771 | 1 |
| FBXL5      | -0.0338528 | 1 |
| SFR1       | 0.0515074  | 1 |
| CSNK1G2    | 0.0043078  | 1 |
| POT1       | 0.0453928  | 1 |
| SLC25A33   | -0.0256033 | 1 |
| SGSM2      | -0.0729425 | 1 |
| TBCC       | 0.1250237  | 1 |
| TYMP       | -0.0462411 | 1 |
| MIR222HG   | -0.1309957 | 1 |
| SIRT2      | -0.106038  | 1 |
| TLR1       | 0.0354325  | 1 |
| EIF3J      | 0.0584113  | 1 |
| SPINK2     | 0.173243   | 1 |
| FEZ2       | -0.011535  | 1 |
| TGFBR2     | -0.0894514 | 1 |
| MUS81      | 0.0082332  | 1 |
| INTS7      | 0.0383577  | 1 |
| LINC01473  | 0.0226206  | 1 |
| MIEF1      | 0.0597381  | 1 |
| TGDS       | 0.0111911  | 1 |
| CCNA1      | 0.0236652  | 1 |
| VPS52      | -0.0014076 | 1 |
| ZNF571     | 0.0033299  | 1 |
| SECISBP2L  | -0.1590857 | 1 |
| USE1       | 0.0727956  | 1 |
| SDF4       | -0.0265212 | 1 |
| SMIM4      | 0.0524213  | 1 |

|            |            |   |
|------------|------------|---|
| TOMM40L    | -0.057077  | 1 |
| SPIN2B     | 0.0272008  | 1 |
| SEC31A     | 0.0236315  | 1 |
| ABL2       | -0.0671089 | 1 |
| NDUFS8     | 0.015597   | 1 |
| GNL3       | 0.1192126  | 1 |
| SLC25A36   | -0.0898532 | 1 |
| AC004540.2 | 0.1380124  | 1 |
| GPKOW      | -0.0469567 | 1 |
| AC016735.1 | 0.0563486  | 1 |
| KIF27      | 0.0361024  | 1 |
| AKIP1      | 0.0404313  | 1 |
| ERMARD     | 0.0192288  | 1 |
| AC009403.1 | 0.0739896  | 1 |
| CYREN      | -0.0465291 | 1 |
| HMGB3      | -0.1356276 | 1 |
| RALA       | 0.0013835  | 1 |
| NIPAL3     | -0.0054463 | 1 |
| AC078846.1 | 0.0201267  | 1 |
| DIABLO     | 0.044724   | 1 |
| TNFAIP8L2  | 0.0257689  | 1 |
| ACTR3B     | 0.0483737  | 1 |
| CSF3R      | 0.1527357  | 1 |
| TTLL5      | -0.0018787 | 1 |
| TMED9      | -0.0623167 | 1 |
| C1RL-AS1   | 0.0109173  | 1 |
| BST2       | 0.1172002  | 1 |
| YEATS2     | 0.0181985  | 1 |
| DUSP7      | -0.0677587 | 1 |
| ZNF217     | 0.0806487  | 1 |
| MIR99AHG   | 0.0851638  | 1 |
| TBCE       | -0.0086887 | 1 |
| LETM1      | 0.045629   | 1 |
| ASCC3      | 0.1198341  | 1 |
| NUP205     | 0.0285115  | 1 |
| SRSF2      | -0.1307051 | 1 |
| LRCH3      | -0.0609587 | 1 |
| TNFRSF10A  | -0.04995   | 1 |
| SP4        | -0.018749  | 1 |
| WDR45      | -0.0271538 | 1 |
| BPNT1      | 0.0293256  | 1 |
| TIMM44     | 0.0391755  | 1 |
| YIPF2      | -0.0115134 | 1 |
| SIDT2      | -0.0042706 | 1 |
| PPP1R14B   | 0.0169887  | 1 |
| ECHDC2     | 0.0178456  | 1 |
| SLC15A2    | 0.0264893  | 1 |
| RERE       | -0.0682401 | 1 |
| ITGAE      | -0.0216823 | 1 |
| WDR35      | -0.0162674 | 1 |



|            |            |   |
|------------|------------|---|
| ZNF280C    | -0.0017338 | 1 |
| RUBCN      | -0.0295182 | 1 |
| MCU        | 0.0261527  | 1 |
| ARL14EP    | 0.0857023  | 1 |
| ARL17B     | 0.0280675  | 1 |
| ZNF583     | -0.021101  | 1 |
| WDR83      | 0.045532   | 1 |
| GIHCG      | 0.1515988  | 1 |
| TRDMT1     | -0.0413295 | 1 |
| APOL6      | -0.0932923 | 1 |
| CLPTM1     | -0.0115039 | 1 |
| OTUB1      | -0.0195546 | 1 |
| HMBOX1     | 0.0185539  | 1 |
| RAB1B      | -0.0455947 | 1 |
| FBXL20     | -0.0207489 | 1 |
| ZNF564     | 0.0010289  | 1 |
| IDNK       | 0.0813004  | 1 |
| LDB1       | 0.042737   | 1 |
| TBCE.1     | -0.0406882 | 1 |
| FEM1B      | -0.0759081 | 1 |
| CNN2       | -0.1281864 | 1 |
| RANBP6     | 0.0892563  | 1 |
| CC2D1A     | 0.0042106  | 1 |
| AGBL5      | -0.0477024 | 1 |
| BMT2       | -0.010064  | 1 |
| PRRC1      | -0.0518223 | 1 |
| ACACA      | -0.0280592 | 1 |
| PCTP       | 0.022566   | 1 |
| RAVER1     | 0.0019193  | 1 |
| ETV3       | -0.0789333 | 1 |
| BAZ1A      | -0.0360284 | 1 |
| TARBP2     | 0.0057804  | 1 |
| TRMT1      | -0.0009735 | 1 |
| KHDC1      | 0.0361361  | 1 |
| RMC1       | -0.0608575 | 1 |
| OS9        | -0.0089349 | 1 |
| NONO       | 0.025349   | 1 |
| ANAPC15    | -0.0588954 | 1 |
| UGGT2      | 0.0442645  | 1 |
| AL133453.1 | 0.0295678  | 1 |
| SVIP       | 0.115539   | 1 |
| TADA1      | 0.0042757  | 1 |
| TTYH2      | 0.0381049  | 1 |
| SMYD5      | 0.0282887  | 1 |
| ATP6V1G1   | -0.0787306 | 1 |
| CNOT4      | 0.0111221  | 1 |
| MFGE8      | 0.043553   | 1 |
| AKAP10     | -0.0040521 | 1 |
| TMEM50A    | -0.1092494 | 1 |
| RNPEPL1    | -0.0300274 | 1 |

|            |            |   |
|------------|------------|---|
| PPIL2      | -0.0272447 | 1 |
| KHSRP      | 0.0727212  | 1 |
| CDK2AP1    | 0.0872595  | 1 |
| HIP1       | -0.0396176 | 1 |
| GORASP1    | -0.0190766 | 1 |
| UTP11      | -0.1102    | 1 |
| NUP35      | 0.0288994  | 1 |
| C14orf119  | -0.0696255 | 1 |
| ZNF226     | 0.0323781  | 1 |
| ZNF699     | -0.0376304 | 1 |
| SPTBN1     | 0.048175   | 1 |
| DCAF5      | -0.0122329 | 1 |
| DEXI       | -0.0345481 | 1 |
| SLC25A44   | -0.0459482 | 1 |
| MTA3       | -0.0199654 | 1 |
| RPN1       | 0.0101287  | 1 |
| FOXK2      | -0.0299292 | 1 |
| ZNF257     | 0.0763125  | 1 |
| USP25      | 0.0374151  | 1 |
| COPS6      | 0.0147736  | 1 |
| NUP43      | 0.037926   | 1 |
| MED16      | 0.0037286  | 1 |
| FTL        | -0.1274571 | 1 |
| NGLY1      | 0.0367252  | 1 |
| STAR       | 0.0358837  | 1 |
| SLC35A3    | 0.0015024  | 1 |
| A1BG-AS1   | -0.0144751 | 1 |
| BBIP1      | -0.0192506 | 1 |
| GMPS       | 0.0971811  | 1 |
| MUL1       | -0.0694151 | 1 |
| HOXB-AS3   | 0.0092257  | 1 |
| NOC4L      | 7.941E-05  | 1 |
| ZNF254     | -0.0342991 | 1 |
| CCDC93     | -0.0397749 | 1 |
| THRA       | 0.06028    | 1 |
| AL591623.1 | -0.0291212 | 1 |
| MTA1       | -0.0419218 | 1 |
| CYP20A1    | 0.0218118  | 1 |
| FAM122A    | 0.014103   | 1 |
| EIF1AX     | 0.1049554  | 1 |
| CNNM4      | 0.0129468  | 1 |
| CHURC1     | 0.0833453  | 1 |
| ARID1A     | 0.0009971  | 1 |
| TNFAIP1    | -0.0928313 | 1 |
| NIPA1      | -0.0790149 | 1 |
| FBXO38     | -0.0739283 | 1 |
| IKBKE      | -0.0419625 | 1 |
| ATG10      | 0.0745762  | 1 |
| ZNF790-AS1 | 0.0665256  | 1 |
| MTMR1      | -0.0133868 | 1 |

|            |            |   |
|------------|------------|---|
| MAP3K3     | -0.0486687 | 1 |
| PHYKPL     | -0.1085351 | 1 |
| AMFR       | -0.0488602 | 1 |
| ZNF746     | -0.0193407 | 1 |
| RAB40C     | 0.0243947  | 1 |
| TRAPPC8    | 0.0106539  | 1 |
| FUZ        | -0.0208893 | 1 |
| ISCA2      | -0.0412185 | 1 |
| RDH11      | 0.0032815  | 1 |
| TAF2       | 0.0396391  | 1 |
| KLHL24     | 0.0473393  | 1 |
| GPATCH8    | -0.068838  | 1 |
| UBR3       | 0.0457052  | 1 |
| CARHSP1    | -0.0573185 | 1 |
| DDX28      | 0.0098148  | 1 |
| CAB39      | -0.0912627 | 1 |
| MEAF6      | 0.0265064  | 1 |
| TFB1M      | 0.0468448  | 1 |
| PRKCSH     | -0.0239377 | 1 |
| AC093827.4 | 0.01607    | 1 |
| ZNF845     | 0.0266781  | 1 |
| LRR1       | 0.0129688  | 1 |
| ZNF678     | 0.048385   | 1 |
| PRDM2      | -0.1261091 | 1 |
| TM2D3      | -0.0998488 | 1 |
| TMF1       | 0.057551   | 1 |
| HAVCR2     | -0.0711532 | 1 |
| ANKRD46    | 0.055477   | 1 |
| SETMAR     | 0.0554601  | 1 |
| VPS26B     | 0.0456525  | 1 |
| ASAP2      | 0.0253454  | 1 |
| ODF2       | -0.0016211 | 1 |
| SMYD4      | 0.060291   | 1 |
| ZNF33B     | 0.1028544  | 1 |
| WASHC1     | 0.0395581  | 1 |
| KDM4A      | 0.0242839  | 1 |
| VAMP5      | 0.0716457  | 1 |
| ZNF592     | -0.0980583 | 1 |
| GLA        | 0.0290323  | 1 |
| PRDM16-DT  | -0.0180165 | 1 |
| NAA16      | -0.0110709 | 1 |
| NBEAL1     | 0.0317375  | 1 |
| DCTN5      | -0.0111121 | 1 |
| CSTF1      | 0.0310663  | 1 |
| MIR4453HG  | -0.0255326 | 1 |
| SEM1       | -0.0812985 | 1 |
| UBTD1      | -0.0582135 | 1 |
| DNAJC25    | 0.018181   | 1 |
| LPP        | 0.0595597  | 1 |
| SPCS2      | 0.0654011  | 1 |

|           |            |   |
|-----------|------------|---|
| CORO1B    | 0.0382416  | 1 |
| MYL6B     | 0.0204587  | 1 |
| PDPK1     | -0.0708117 | 1 |
| DNAJC3-DT | 0.0642005  | 1 |
| USP1      | 0.0380308  | 1 |
| SMYD2     | -0.0285322 | 1 |
| ULK3      | -0.0499279 | 1 |
| ERAP2     | 0.0195798  | 1 |
| LINC02591 | -0.0026645 | 1 |
| TAOK1     | -0.022684  | 1 |
| DEPDC5    | 0.0289256  | 1 |
| CNTROB    | -0.0118211 | 1 |
| C1orf122  | -0.0576988 | 1 |
| SPAST     | 0.0180965  | 1 |
| STAP1     | -0.0364307 | 1 |
| SETD4     | -0.0422843 | 1 |
| LPGAT1    | -0.0055897 | 1 |
| WRN       | 0.1186875  | 1 |
| ZNF281    | 0.0309385  | 1 |
| NBDY      | -0.0584661 | 1 |
| DVL3      | 0.0049141  | 1 |
| ANKRD52   | -0.0098564 | 1 |
| KIN       | 0.0172434  | 1 |
| GTF3C4    | -0.0292574 | 1 |
| TSC22D2   | -0.0637316 | 1 |
| RPE       | 0.0709765  | 1 |
| TECPR1    | -0.0124453 | 1 |
| NSUN5     | 0.0165699  | 1 |
| PSMC3     | -0.0425946 | 1 |
| LBH       | 0.0635194  | 1 |
| DERL3     | -0.0315644 | 1 |
| PPP1R26   | 0.0419098  | 1 |
| KIAA0556  | -0.0286821 | 1 |
| CD244     | 0.0412763  | 1 |
| ZNF445    | 0.1110379  | 1 |
| TMEM161B  | 0.0320376  | 1 |
| CNPPD1    | -0.0609725 | 1 |
| NEDD1     | -0.0192507 | 1 |
| SNX29     | 0.0308317  | 1 |
| USP39     | 0.0109127  | 1 |
| SRP68     | -0.0512148 | 1 |
| WDR77     | -0.0012664 | 1 |
| DNAJC14   | -0.0074828 | 1 |
| VCP       | -0.163585  | 1 |
| ISG20L2   | 0.0462596  | 1 |
| SLC38A9   | 0.0355376  | 1 |
| HOOK2     | 0.0519715  | 1 |
| ZNF266    | -0.0327333 | 1 |
| CDYL2     | -0.0275241 | 1 |
| FUBP3     | 0.0249796  | 1 |

|           |            |   |
|-----------|------------|---|
| OSGEP     | -0.0308056 | 1 |
| BTN2A1    | -0.0568754 | 1 |
| CD33      | 0.0907917  | 1 |
| UBE3B     | -0.0254893 | 1 |
| DDX41     | 0.0475286  | 1 |
| G6PC3     | -0.0521309 | 1 |
| RAD1      | -0.0490374 | 1 |
| TPRA1     | 0.0248525  | 1 |
| ZNF621    | 0.0256619  | 1 |
| ATP6V1E1  | -0.0618878 | 1 |
| PWP1      | 0.0347728  | 1 |
| PFKP      | 0.0432432  | 1 |
| CHMP7     | -0.0134786 | 1 |
| SCAMP4    | -0.0419933 | 1 |
| CUL9      | -0.0079291 | 1 |
| LENG9     | 0.0473402  | 1 |
| TAX1BP1   | -0.1016136 | 1 |
| PDIA6     | 0.0309456  | 1 |
| ATG2A     | 0.0265436  | 1 |
| STAG2     | 0.0038171  | 1 |
| PNPLA2    | -0.0587717 | 1 |
| BNIP1     | -0.0761735 | 1 |
| EXOSC1    | -0.0195125 | 1 |
| LINC00847 | -0.0045292 | 1 |
| MIR1915HG | 0.031895   | 1 |
| BCL2L1    | 0.0196967  | 1 |
| MDM2      | 0.0573952  | 1 |
| GSTM4     | 0.0450238  | 1 |
| STMN3     | -0.0744391 | 1 |
| MRFAP1L1  | 0.0616457  | 1 |
| AKR1C3    | 0.1230973  | 1 |
| FBXL19    | 0.0121684  | 1 |
| LETM2     | -0.0901745 | 1 |
| NSUN4     | 0.0164036  | 1 |
| ANKMY1    | 0.0050584  | 1 |
| EIF2S2    | -0.1710762 | 1 |
| LEPR      | 0.0573806  | 1 |
| WDR6      | -0.0346147 | 1 |
| NUBP2     | 0.0474908  | 1 |
| PMPCB     | 0.0961083  | 1 |
| ARHGEF40  | -0.0707787 | 1 |
| IFRD1     | -0.0389127 | 1 |
| POLD3     | -0.0008513 | 1 |
| ZNF717    | 0.0602712  | 1 |
| ZNF408    | -0.0435203 | 1 |
| MRPL13    | 0.0086133  | 1 |
| NRG4      | 0.046224   | 1 |
| TET3      | 0.0209156  | 1 |
| POM121    | -0.0156075 | 1 |
| TCTN1     | -0.0470838 | 1 |

|            |            |   |
|------------|------------|---|
| SULT1C4    | 0.0462198  | 1 |
| DNMT3A     | -0.0299417 | 1 |
| TRAF3IP2   | -0.0544287 | 1 |
| ZNF207     | -0.0975691 | 1 |
| BATF       | 0.0272248  | 1 |
| MZB1       | 0.1455206  | 1 |
| HIC2       | 0.0362131  | 1 |
| A2M-AS1    | 0.0616937  | 1 |
| RAB3IP     | -0.0295608 | 1 |
| GFER       | 0.0421656  | 1 |
| VPS4B      | -0.0197074 | 1 |
| MIR29B2CH  | -0.0219048 | 1 |
| DSN1       | 0.0273079  | 1 |
| UAP1       | -0.0442239 | 1 |
| IDH3B      | -0.018934  | 1 |
| RGPD5      | -0.0483727 | 1 |
| CHSY1      | 0.0091035  | 1 |
| DCAF11     | 0.0115157  | 1 |
| SLC35D2    | -0.0134388 | 1 |
| WDR11      | -0.0263608 | 1 |
| DLEU2      | -0.062306  | 1 |
| YARS2      | -0.02791   | 1 |
| AC244090.1 | 0.0233074  | 1 |
| PPP2R2D    | -0.0033921 | 1 |
| FGFR1OP    | 0.0136248  | 1 |
| XRCC1      | 0.0011631  | 1 |
| ATG16L2    | -0.0015485 | 1 |
| HOXA5      | 0.0078401  | 1 |
| NDUFA11    | 0.0654372  | 1 |
| MSL1       | 0.0796789  | 1 |
| SERINC5    | 0.0005749  | 1 |
| ARHGAP12   | 0.0227078  | 1 |
| MED23      | -0.06125   | 1 |
| B3GNT5     | -0.0552927 | 1 |
| TADA3      | 0.0584046  | 1 |
| ZNF182     | 0.0313561  | 1 |
| CCPG1      | 0.0732734  | 1 |
| ETS2       | -0.1394813 | 1 |
| WT1        | 0.0624617  | 1 |
| ADCY3      | 0.0273138  | 1 |
| HDAC4      | 0.0150597  | 1 |
| CDC37L1    | 0.0275393  | 1 |
| SUOX       | 0.0372008  | 1 |
| DROSHA     | 0.036908   | 1 |
| WDR41      | 0.0046915  | 1 |
| BRAP       | -0.1051485 | 1 |
| UQCC3      | 0.1106584  | 1 |
| VIPAS39    | -0.0176631 | 1 |
| BORCS8     | -0.0208135 | 1 |
| PTGES2     | 0.0213317  | 1 |

|            |            |   |
|------------|------------|---|
| SRGAP2C    | 0.0318645  | 1 |
| CCDC84     | 0.0103181  | 1 |
| PRR5       | 0.0098345  | 1 |
| KMT5A      | 0.0121012  | 1 |
| C1orf109   | 0.0402959  | 1 |
| METAP1     | 0.0725588  | 1 |
| ANKRD10    | 0.0403065  | 1 |
| VAT1       | -0.0918465 | 1 |
| RBM23      | 0.0005178  | 1 |
| MRPS18B    | 0.0831963  | 1 |
| KDM3A      | -0.1028794 | 1 |
| AC092164.1 | 0.0181131  | 1 |
| LGALS9     | -0.0206108 | 1 |
| PSMD14     | -0.0807235 | 1 |
| NDUFB9     | -0.1667847 | 1 |
| DYNLL2     | -0.040053  | 1 |
| BTRC       | 0.0152161  | 1 |
| PARP10     | 0.0136891  | 1 |
| ATOX1      | -0.079455  | 1 |
| FAM76B     | 0.0524246  | 1 |
| NAGK       | -0.0386614 | 1 |
| CHCHD5     | -0.0275167 | 1 |
| COX19      | -0.0653712 | 1 |
| AP4B1      | -0.0278504 | 1 |
| NIP7       | 0.0068393  | 1 |
| ACY1       | 0.0197081  | 1 |
| NT5DC2     | 0.033985   | 1 |
| TRIM21     | -0.0347492 | 1 |
| ZNF740     | 0.0494982  | 1 |
| ZBTB41     | 0.0480753  | 1 |
| NSMCE1-DT  | 0.0485968  | 1 |
| NF1        | 0.0268872  | 1 |
| CBX2       | 0.0306314  | 1 |
| PNRC2      | -0.0254401 | 1 |
| KLHL6      | -0.0155704 | 1 |
| CCT4       | 0.0328981  | 1 |
| TIMM21     | 0.0492054  | 1 |
| SLC25A38   | 0.0385298  | 1 |
| KANK2      | -0.0863183 | 1 |
| TPMT       | 0.0341478  | 1 |
| GRB10      | -0.0855361 | 1 |
| TCF7       | 0.0095533  | 1 |
| ZC3H7A     | 0.004116   | 1 |
| GIGYF1     | -0.0033481 | 1 |
| AC009831.3 | -0.0287081 | 1 |
| NDUFAF5    | -0.0582835 | 1 |
| FAM41C     | -0.0250482 | 1 |
| GNPNAT1    | -0.1178629 | 1 |
| USP19      | 0.0440443  | 1 |
| SETDB1     | -0.0361505 | 1 |

|          |            |   |
|----------|------------|---|
| HNRNPH3  | 0.0378513  | 1 |
| SEL1L3   | -0.0517686 | 1 |
| POLDIP2  | 0.0136256  | 1 |
| CCAR2    | -0.035047  | 1 |
| TBRG1    | -0.0541858 | 1 |
| ARRDC1   | -0.0430374 | 1 |
| NUMBL    | -0.0307675 | 1 |
| SF3A1    | -0.0336975 | 1 |
| FRS2     | -0.0306239 | 1 |
| CYP2R1   | 0.0018355  | 1 |
| AXIN1    | -0.0335669 | 1 |
| CTDSP2   | -0.0730394 | 1 |
| HELLS    | 0.0010997  | 1 |
| BNIP2    | -0.1526546 | 1 |
| FLII     | -0.0531793 | 1 |
| SEPSECS  | 0.0273079  | 1 |
| HSPA13   | -0.1088431 | 1 |
| UEVLD    | 0.0215171  | 1 |
| AAK1     | 0.0083133  | 1 |
| CDK5RAP1 | 0.0012612  | 1 |
| GALT     | 0.0284616  | 1 |
| MAP3K7   | -0.0202745 | 1 |
| AP3M2    | -0.0108838 | 1 |
| ATF6     | -0.0925154 | 1 |
| INTS12   | -0.0158346 | 1 |
| CLHC1    | 0.0470851  | 1 |
| ZNF614   | 0.0169234  | 1 |
| RNF216   | 0.0684226  | 1 |
| PEX19    | 0.0073166  | 1 |
| KATNAL1  | -0.015041  | 1 |
| SYMPK    | 0.025553   | 1 |
| KLHL11   | 0.0472096  | 1 |
| TMEM9B   | 0.0189601  | 1 |
| MAIP1    | -0.0347276 | 1 |
| METTL21A | -0.0116684 | 1 |
| JMJD7    | -0.0270701 | 1 |
| NAGA     | 0.0297374  | 1 |
| LSG1     | 0.0312754  | 1 |
| REPS1    | 0.0059412  | 1 |
| HNRNPD   | -0.1527459 | 1 |
| ANKRD44  | -0.0139606 | 1 |
| MRPL46   | -0.0235351 | 1 |
| CAMSAP1  | 0.0029072  | 1 |
| APLF     | 0.0269909  | 1 |
| NUBP1    | -0.0684384 | 1 |
| BTBD8    | 0.0583733  | 1 |
| ERO1B    | 0.0165256  | 1 |
| ABCC1    | 0.0025492  | 1 |
| PHAX     | -0.0170706 | 1 |
| GVQW3    | -0.0270997 | 1 |



|            |            |   |
|------------|------------|---|
| HPRT1      | 0.0133509  | 1 |
| CSNK2A2    | -0.0074112 | 1 |
| TSPOAP1-A  | -0.0033406 | 1 |
| GPATCH1    | 0.0773559  | 1 |
| METTLL22   | -0.0304544 | 1 |
| SNRPF      | 0.1332006  | 1 |
| CLCN6      | -0.0587918 | 1 |
| SCML2      | -0.0240727 | 1 |
| USP5       | 0.0330746  | 1 |
| UBE4A      | -0.0002848 | 1 |
| CLN3       | -0.002977  | 1 |
| DNAJB12    | -0.1075926 | 1 |
| FBXO42     | -0.036251  | 1 |
| ZNF212     | -0.0428477 | 1 |
| APOL2      | 0.0315471  | 1 |
| FRMD4A     | 0.0003559  | 1 |
| BCLAF3     | -0.0315625 | 1 |
| PCM1       | 0.0376112  | 1 |
| MT2A       | -0.1719231 | 1 |
| COP1       | -0.0157664 | 1 |
| SLC25A26   | 0.055024   | 1 |
| CDIP1      | -0.0029721 | 1 |
| TUT1       | 0.0124796  | 1 |
| ANKRD49    | 0.0957616  | 1 |
| VBP1       | 0.0578428  | 1 |
| CXorf56    | -0.005964  | 1 |
| TMEM91     | -0.0907811 | 1 |
| KLHL12     | -0.0146902 | 1 |
| SART3      | -0.0490451 | 1 |
| EIF1B      | -0.1541244 | 1 |
| SPOPL      | -0.0620059 | 1 |
| AL080276.2 | -0.0100947 | 1 |
| PPAT       | 0.0797366  | 1 |
| FAM193A    | -0.0355435 | 1 |
| AREL1      | -0.0637776 | 1 |
| DYRK2      | -0.0256916 | 1 |
| AC016065.1 | 0.0079839  | 1 |
| LIMK2      | -0.0499724 | 1 |
| DCAF7      | 0.0610516  | 1 |
| CAPN15     | -0.0063941 | 1 |
| SNAPIN     | 0.0281949  | 1 |
| CNOT6      | 0.03975    | 1 |
| C9orf72    | -0.0070122 | 1 |
| HSD17B11   | 0.0676342  | 1 |
| TYMSOS     | 0.032397   | 1 |
| NDUFV1     | -0.0548153 | 1 |
| PIGB       | 0.0134307  | 1 |
| AC097376.3 | 0.058837   | 1 |
| MBIP       | -0.0355263 | 1 |
| PROSER1    | -0.0157126 | 1 |

|            |            |   |
|------------|------------|---|
| RETSAT     | 0.0143182  | 1 |
| SMARCB1    | -0.0315915 | 1 |
| SMARCD1    | -0.0012404 | 1 |
| ELK3       | -0.0961872 | 1 |
| TMEM185B   | 0.0562409  | 1 |
| MIOS       | -0.0420431 | 1 |
| AL035530.2 | 0.0540814  | 1 |
| ZNF444     | 0.0245212  | 1 |
| TAF10      | -0.0197436 | 1 |
| PHC2       | -0.0580475 | 1 |
| FAM192A    | 0.1433378  | 1 |
| NUDT18     | -0.046889  | 1 |
| DHRS12     | -0.0225347 | 1 |
| ZCCHC4     | 0.0126413  | 1 |
| PHTF2      | -0.10908   | 1 |
| AGO3       | -0.0569189 | 1 |
| MAD2L2     | 0.0547972  | 1 |
| RSPH3      | -0.0097379 | 1 |
| RINT1      | 0.0023865  | 1 |
| TAF6       | -0.0125869 | 1 |
| MED7       | 0.0493113  | 1 |
| CEP135     | -0.0101542 | 1 |
| ZNF75D     | 0.0257999  | 1 |
| NUDT1      | -0.075866  | 1 |
| GTF3C2     | 0.0077356  | 1 |
| TIPRL      | 0.0077561  | 1 |
| ANKRD36B   | -0.0264496 | 1 |
| CMC2       | -0.085781  | 1 |
| ESCO1      | -0.0919591 | 1 |
| WDCP       | 0.0384529  | 1 |
| RNF123     | 0.0377246  | 1 |
| CDK10      | -0.0043691 | 1 |
| CNOT8      | -0.0933663 | 1 |
| CHST11     | -0.1099055 | 1 |
| ITPA       | 0.1190059  | 1 |
| PLSCR3     | 0.0017348  | 1 |
| PHF3       | 0.0043265  | 1 |
| POLR2K     | -0.0244798 | 1 |
| FTSJ1      | 0.0238731  | 1 |
| ATP5MD     | 0.0447859  | 1 |
| GGT5       | 0.0322648  | 1 |
| TMEM268    | 0.0051339  | 1 |
| ELAVL1     | -0.0260301 | 1 |
| TMEM222    | -0.0314595 | 1 |
| GCC2       | -0.0725878 | 1 |
| RHBDD3     | 0.0116368  | 1 |
| AC017083.1 | 0.0257871  | 1 |
| ZNF436-AS1 | -0.028498  | 1 |
| GNPAT      | -0.0524822 | 1 |
| PEPD       | 0.0537414  | 1 |

|            |            |   |
|------------|------------|---|
| MAP2K5     | 0.0290841  | 1 |
| LINC02328  | 0.0094678  | 1 |
| NCOR1      | 0.0345885  | 1 |
| ZNF526     | -0.0311112 | 1 |
| POLR3C     | 0.0384302  | 1 |
| WAS        | 0.0384024  | 1 |
| SLC9A6     | -0.0269284 | 1 |
| SNAPC3     | 0.0368161  | 1 |
| GTF3C6     | -0.0857218 | 1 |
| BOLA2      | -0.0245797 | 1 |
| HMGN4      | -0.0133563 | 1 |
| CDK7       | -0.0452575 | 1 |
| MTF2       | -0.061841  | 1 |
| AC004854.2 | 0.0444888  | 1 |
| CMC4       | -0.0254668 | 1 |
| SNRPC      | -0.0700748 | 1 |
| DENND10    | 0.0172647  | 1 |
| USP49      | 0.0179304  | 1 |
| STX6       | -0.0331732 | 1 |
| SNRPB2     | 0.0280587  | 1 |
| PYROXD2    | 0.0272642  | 1 |
| NTAN1      | -0.0434878 | 1 |
| SC5D       | -0.0150607 | 1 |
| REPS2      | 0.0284377  | 1 |
| ZMAT1      | 0.0100052  | 1 |
| POLR2L     | -0.0569832 | 1 |
| RAB3GAP1   | -0.0094136 | 1 |
| PEX2       | -0.0743606 | 1 |
| DENND1B    | -0.010558  | 1 |
| THUMPD3    | -0.0585453 | 1 |
| ZNF865     | -0.0061178 | 1 |
| ADGRG1     | -0.1242383 | 1 |
| PIAS3      | 0.0098667  | 1 |
| SNX5       | 0.0154184  | 1 |
| UBL3       | -0.046426  | 1 |
| TOR1AIP2   | -0.0808937 | 1 |
| NBN        | 0.0911413  | 1 |
| CLIP4      | 0.057015   | 1 |
| TTC38      | 0.0060393  | 1 |
| ZRANB3     | 0.0324675  | 1 |
| LANCL2     | -0.0500689 | 1 |
| NR2C2AP    | 0.0550793  | 1 |
| TPD52L2    | -0.0441839 | 1 |
| EXT2       | 0.0317404  | 1 |
| KEAP1      | -0.0368589 | 1 |
| ZFYVE19    | -0.0196647 | 1 |
| CERS6      | 0.0528454  | 1 |
| NPAT       | 0.0300245  | 1 |
| SSBP1      | 0.123087   | 1 |
| MCUR1      | 0.0333103  | 1 |

|            |            |   |
|------------|------------|---|
| MYO5A      | 0.0062623  | 1 |
| OSBPL7     | 0.0088389  | 1 |
| IPMK       | -0.0630058 | 1 |
| KCNK5      | -0.0305871 | 1 |
| NIPSNAP2   | 0.0294429  | 1 |
| RDH5       | 0.0315793  | 1 |
| KLC4       | 0.002461   | 1 |
| LBR        | -0.1087729 | 1 |
| MYOZ3      | 0.040285   | 1 |
| POM121C    | -0.0148896 | 1 |
| HHLA3      | 0.0370744  | 1 |
| TMEM187    | 0.0188785  | 1 |
| FAM210A    | -0.0302306 | 1 |
| TWF1       | 0.0240912  | 1 |
| CDK13      | 0.0258952  | 1 |
| GOT1       | -0.019794  | 1 |
| SUGP1      | 0.049561   | 1 |
| BRPF1      | -0.0705629 | 1 |
| PGAP2      | 0.0502209  | 1 |
| METTL14    | -0.0134727 | 1 |
| GIT1       | -0.0234475 | 1 |
| PLPP6      | 0.0179573  | 1 |
| CRKL       | -0.0453823 | 1 |
| TXNL4B     | 0.001582   | 1 |
| CENPU      | 0.0045915  | 1 |
| PHB2       | -0.017469  | 1 |
| ITGA6-AS1  | 0.0462515  | 1 |
| WARS2      | -0.0149188 | 1 |
| GIPC1      | 0.0309243  | 1 |
| TTC21B     | 0.0217832  | 1 |
| TRIM58     | -0.0638219 | 1 |
| UBE2O      | 0.0368864  | 1 |
| AC018362.1 | 0.0297608  | 1 |
| HSDL1      | 0.0128432  | 1 |
| TRAPPC13   | -0.044132  | 1 |
| AC092821.3 | 0.0307877  | 1 |
| AKNA       | -0.114539  | 1 |
| NME7       | 0.0783871  | 1 |
| UMAD1      | 0.0434731  | 1 |
| OGDH       | 0.0073294  | 1 |
| PACS2      | -0.0195778 | 1 |
| PDHB       | 0.0079629  | 1 |
| SAV1       | 0.0255908  | 1 |
| HK1        | -0.0706936 | 1 |
| RANBP9     | -0.0803848 | 1 |
| VPS51      | -0.0289058 | 1 |
| PTAFR      | 0.0268542  | 1 |
| CLPX       | 0.0654257  | 1 |
| CAPN11     | -0.0550533 | 1 |
| ACADS      | 0.0231919  | 1 |

|            |            |   |
|------------|------------|---|
| TRAK1      | -0.0792139 | 1 |
| PPP1R37    | -0.0439615 | 1 |
| BTG3       | -0.0747428 | 1 |
| UGCG       | 0.0109608  | 1 |
| MTDH       | -0.0307622 | 1 |
| TUG1       | 0.0427194  | 1 |
| RHPN1      | -0.0731858 | 1 |
| BRWD1      | -0.0458954 | 1 |
| MEGF6      | 0.0490334  | 1 |
| NSUN3      | 0.0556204  | 1 |
| HIST1H3H   | -0.0775372 | 1 |
| ACAT2      | 0.0235437  | 1 |
| CTNNBIP1   | 0.0039589  | 1 |
| INTS9      | 0.0337907  | 1 |
| HNRNPU     | -0.1317252 | 1 |
| SGMS1-AS1  | 0.0383644  | 1 |
| LINC01137  | 0.0293242  | 1 |
| FOXP1      | -0.1017529 | 1 |
| FAM102A    | -0.0018564 | 1 |
| RNF146     | 0.0366561  | 1 |
| C1orf50    | -0.1009687 | 1 |
| SNX8       | -0.0494352 | 1 |
| KCTD2      | -0.0542568 | 1 |
| TLE4       | -0.114114  | 1 |
| CHIC1      | 0.0133895  | 1 |
| RNF26      | 0.0107433  | 1 |
| NDUFS5     | -0.0564987 | 1 |
| CHAF1A     | -0.0362949 | 1 |
| PHGDH      | -0.0368809 | 1 |
| ARF5       | -0.0495298 | 1 |
| BARD1      | 0.0160789  | 1 |
| PHF11      | 0.0681269  | 1 |
| STARD4     | -0.040137  | 1 |
| GIT2       | 0.0318563  | 1 |
| SLC12A6    | -0.0098286 | 1 |
| NKAPD1     | -0.0906417 | 1 |
| KRT8       | 0.0717124  | 1 |
| TRIM71     | 0.0424238  | 1 |
| AL121944.1 | -0.0759847 | 1 |
| NUDT2      | 0.0352763  | 1 |
| AC008443.5 | 0.0667712  | 1 |
| TMED7      | -0.0259587 | 1 |
| DCUN1D1    | -0.005957  | 1 |
| ARSK       | 0.025561   | 1 |
| GDAP2      | -0.0099133 | 1 |
| TAF6L      | 0.0096606  | 1 |
| REC8       | -0.0352994 | 1 |
| IGSF8      | -0.001596  | 1 |
| AL049840.5 | -0.0662268 | 1 |
| NR1H3      | 0.0247191  | 1 |

|            |            |   |
|------------|------------|---|
| DNAJC17    | 0.0138587  | 1 |
| GRAMD4     | -0.0335191 | 1 |
| GRB2       | -0.004205  | 1 |
| TIGD5      | 0.0164924  | 1 |
| DLC1       | 0.0345048  | 1 |
| UNC13D     | -0.0539932 | 1 |
| SNX27      | 0.0398231  | 1 |
| CYC1       | 0.0709975  | 1 |
| DGKE       | 0.0549512  | 1 |
| TRAF7      | 0.0088109  | 1 |
| ZNF567     | 0.0528136  | 1 |
| C5orf30    | -0.0364369 | 1 |
| CIP2A      | 0.0216258  | 1 |
| VPS18      | -0.0520971 | 1 |
| COMMD5     | -0.0183837 | 1 |
| LMBRD1     | -0.00872   | 1 |
| TTLL3      | 0.0028105  | 1 |
| UBAP2      | 0.0329316  | 1 |
| TRAM2      | 0.0095333  | 1 |
| SP140L     | 0.0352526  | 1 |
| SCYL1      | -0.0498603 | 1 |
| DOT1L      | -0.0936281 | 1 |
| YIPF1      | 0.0296307  | 1 |
| ZC3HC1     | -0.0407174 | 1 |
| AC016394.1 | 0.0316889  | 1 |
| SNX15      | -0.0081048 | 1 |
| AL135925.1 | 0.0617057  | 1 |
| GABPA      | 0.0244582  | 1 |
| BRF2       | -0.0136559 | 1 |
| TRAPPC11   | 0.0973831  | 1 |
| TAF1D      | -0.1439499 | 1 |
| AC104162.2 | -0.0295461 | 1 |
| ZFYVE21    | -0.026339  | 1 |
| ADGRA2     | 0.044537   | 1 |
| FAM107B    | -0.1246024 | 1 |
| RRP7A      | 0.0168496  | 1 |
| MADD       | -0.0249897 | 1 |
| VPS16      | 0.007581   | 1 |
| ZNF432     | -0.0014181 | 1 |
| OSBPL8     | 0.0207162  | 1 |
| DCUN1D5    | -0.0031229 | 1 |
| DDB1       | 0.0406636  | 1 |
| AP2B1      | 0.0465798  | 1 |
| GEMIN2     | 0.0241203  | 1 |
| CRTC1      | -0.0160149 | 1 |
| CTPS2      | 0.007255   | 1 |
| DRAM1      | -0.063975  | 1 |
| PDZD8      | -0.0349218 | 1 |
| PTRHD1     | 0.0787806  | 1 |
| TACO1      | -0.0422718 | 1 |

|            |            |   |
|------------|------------|---|
| ABO        | 0.0502245  | 1 |
| LRRRC58    | 0.0566853  | 1 |
| ZNF771     | -0.0041339 | 1 |
| NANP       | 0.0251379  | 1 |
| PXMP2      | 0.0231654  | 1 |
| UQCC1      | 0.0623299  | 1 |
| F8A3       | 0.0538037  | 1 |
| ANAPC2     | 0.0239624  | 1 |
| CYP51A1    | -0.0110288 | 1 |
| CCDC71     | -0.0533824 | 1 |
| RIPK3      | -0.0512691 | 1 |
| ITPK1      | 0.0006723  | 1 |
| UBE2E3     | -0.0211583 | 1 |
| FIZ1       | -0.0055594 | 1 |
| C18orf21   | -0.0627957 | 1 |
| IGF2BP2    | -0.0500741 | 1 |
| SPRTN      | 0.0423649  | 1 |
| SRSF9      | 0.0323687  | 1 |
| RFK        | -0.0229909 | 1 |
| AC092069.1 | -0.0288209 | 1 |
| PAPOLG     | -0.0498244 | 1 |
| AHCTF1     | -0.0012802 | 1 |
| TCF3       | 0.073543   | 1 |
| C2orf49    | 0.0111959  | 1 |
| INTS14     | 0.0018127  | 1 |
| TIMM22     | -0.0727194 | 1 |
| CLTA       | -0.0727034 | 1 |
| EID2B      | 0.0290268  | 1 |
| TOGARAM1   | -0.0927095 | 1 |
| NEPRO      | 0.0105287  | 1 |
| DHDDS      | -0.0086249 | 1 |
| ZFHX3      | -0.0174767 | 1 |
| NSMCE2     | 0.0468359  | 1 |
| MRPL38     | 0.0989407  | 1 |
| PSMG3-AS1  | 0.0300774  | 1 |
| BRMS1      | -0.0326118 | 1 |
| FRAT1      | 0.0446156  | 1 |
| C17orf75   | 0.0235343  | 1 |
| ZNF267     | -0.0537726 | 1 |
| RMND5B     | -0.034608  | 1 |
| BEX3       | 0.0335682  | 1 |
| SCO1       | 0.0464175  | 1 |
| STRADA     | -0.0359373 | 1 |
| CHP1       | -0.0976926 | 1 |
| SHLD3      | 0.0355666  | 1 |
| ELP5       | -0.0971063 | 1 |
| ZFYVE1     | -0.0277656 | 1 |
| CELF2      | -0.0767649 | 1 |
| TBCEL      | 0.0239371  | 1 |
| MXD1       | -0.087789  | 1 |

|            |            |   |
|------------|------------|---|
| AC007038.2 | 0.0332763  | 1 |
| CCDC28A    | -0.0273953 | 1 |
| FANCM      | 0.0579064  | 1 |
| LINC00893  | -0.0125096 | 1 |
| SIKE1      | 0.0010486  | 1 |
| UBXN11     | -0.028995  | 1 |
| HINT1      | 0.0275685  | 1 |
| C20orf96   | 0.018101   | 1 |
| DNAJA4     | -0.0089558 | 1 |
| RABGGTA    | 0.0188083  | 1 |
| DECR1      | 0.006159   | 1 |
| ELAC1      | 0.0267055  | 1 |
| TLE3       | -0.0897127 | 1 |
| PDXDC1     | 0.0026162  | 1 |
| YIF1B      | -0.0315513 | 1 |
| DAZAP2     | 0.0321493  | 1 |
| PHF20L1    | -0.063667  | 1 |
| ESYT2      | -0.1600538 | 1 |
| EIF3A      | 0.1479703  | 1 |
| ZNF510     | 0.0402237  | 1 |
| SPTLC1     | 0.060235   | 1 |
| DCAF8      | 0.0663647  | 1 |
| DENND5A    | -0.0669103 | 1 |
| TMEM216    | -0.0609087 | 1 |
| RECQL5     | 0.0325589  | 1 |
| LEO1       | 0.0360421  | 1 |
| UAP1L1     | 0.0105019  | 1 |
| EXOSC7     | 0.0709829  | 1 |
| GPATCH2L   | 0.0645382  | 1 |
| SAMSN1     | 0.0612808  | 1 |
| ATP13A3    | -0.0819398 | 1 |
| RBSN       | -0.0205338 | 1 |
| RPUSD2     | -0.0391111 | 1 |
| HOXA7      | 0.0621387  | 1 |
| FAM193B    | -0.011797  | 1 |
| FAM199X    | -0.0534497 | 1 |
| GYPC       | 0.049639   | 1 |
| PSMD13     | -0.0151001 | 1 |
| ABHD5      | -0.015256  | 1 |
| PCCB       | 0.0153439  | 1 |
| ANKRD12    | -0.0985718 | 1 |
| MICU3      | 0.0036884  | 1 |
| GAA        | -0.0151315 | 1 |
| NAT9       | -0.0563684 | 1 |
| ST3GAL2    | -0.0709362 | 1 |
| ANKMY2     | -0.0406506 | 1 |
| NDUFB4     | -0.006734  | 1 |
| POLDIP3    | -0.0895653 | 1 |
| AATF       | 0.065606   | 1 |
| RUSC2      | -0.0298642 | 1 |



|            |            |   |
|------------|------------|---|
| IL17RA     | 0.0191555  | 1 |
| AL645568.1 | 0.0349494  | 1 |
| SLC35F2    | 0.0299165  | 1 |
| HLA-DPB1   | 0.0875575  | 1 |
| WVOX       | 0.0148008  | 1 |
| SEC61A1    | -0.0547701 | 1 |
| ZNF230     | 0.0260753  | 1 |
| NIPA2      | -0.0567691 | 1 |
| MED22      | -0.0261806 | 1 |
| ZNF419     | -0.0001036 | 1 |
| ARL6IP4    | -0.0765554 | 1 |
| MT1F       | -0.012187  | 1 |
| ABITRAM    | 0.0142723  | 1 |
| C11orf21   | 0.0146337  | 1 |
| PRCC       | -0.0627804 | 1 |
| ACPP       | 0.0030252  | 1 |
| MICALL1    | -0.037853  | 1 |
| DANCR      | 0.0608967  | 1 |
| TOM1L2     | -0.0497958 | 1 |
| ZNF75A     | 0.0082973  | 1 |
| MMGT1      | 0.0685878  | 1 |
| RBAK       | 0.0122218  | 1 |
| GGCX       | -0.0124835 | 1 |
| TIMM50     | 0.004271   | 1 |
| PSMD3      | 0.0441066  | 1 |
| AP1B1      | -0.001162  | 1 |
| MEIS1-AS2  | -0.0690906 | 1 |
| SPDL1      | 0.0781382  | 1 |
| APBA3      | 0.0143994  | 1 |
| EXOSC10    | 0.0362397  | 1 |
| ABCB10     | 0.0414171  | 1 |
| CEP120     | 0.0257691  | 1 |
| USP37      | -0.0333047 | 1 |
| BBS2       | 0.0103014  | 1 |
| RSBN1      | 0.0686172  | 1 |
| ANKRA2     | -0.0005785 | 1 |
| TMEM214    | 0.007705   | 1 |
| BORCS6     | -0.0386873 | 1 |
| WDR19      | 0.0066978  | 1 |
| SNHG32     | 0.1572756  | 1 |
| CACTIN     | -0.0062765 | 1 |
| SOCS6      | -0.0076659 | 1 |
| CARMIL2    | 0.0054893  | 1 |
| LTB4R      | -0.0352194 | 1 |
| PRUNE1     | -0.0013259 | 1 |
| CANT1      | -0.0352843 | 1 |
| GPS1       | -4.33E-05  | 1 |
| AC008124.1 | -0.0420806 | 1 |
| HERC6      | 0.0396033  | 1 |
| TTC5       | 0.1116186  | 1 |

|            |            |   |
|------------|------------|---|
| ZMAT2      | 0.0122812  | 1 |
| MAP2K1     | 0.0100435  | 1 |
| SERINC3    | 0.0199221  | 1 |
| GTF3C1     | 0.0417076  | 1 |
| PIK3C2B    | 0.0051564  | 1 |
| NELFA      | -0.0171517 | 1 |
| ITPRIPL2   | -0.0555444 | 1 |
| IL15RA     | -0.0197372 | 1 |
| THEM4      | 0.0346501  | 1 |
| COMTD1     | -0.046922  | 1 |
| TIPARP-AS1 | 0.0311784  | 1 |
| IMP4       | 0.0303621  | 1 |
| RPL15      | -0.0616874 | 1 |
| RFWD3      | 0.0100717  | 1 |
| E2F3       | -0.0587317 | 1 |
| UBXN6      | -0.0527638 | 1 |
| NIPSNAP1   | 0.0504996  | 1 |
| DDX11      | 0.029373   | 1 |
| AC007566.1 | 0.0504568  | 1 |
| ITGAV      | 0.0128824  | 1 |
| WRAP73     | 0.0385071  | 1 |
| ITGB2-AS1  | -0.0703695 | 1 |
| METTL6     | 0.0266676  | 1 |
| TMEM39B    | 0.0264427  | 1 |
| SERPING1   | 0.0395141  | 1 |
| MARK2      | -0.0610132 | 1 |
| ALG12      | 0.0083913  | 1 |
| BTK        | 0.1431396  | 1 |
| TUBG1      | -0.0113833 | 1 |
| CIAO3      | -0.0115684 | 1 |
| POLR2J2    | 0.0278358  | 1 |
| KCTD6      | -0.0431145 | 1 |
| ARRDC1-AS  | -0.0215033 | 1 |
| TBC1D24    | 0.0344091  | 1 |
| ATPAF2     | -0.0066844 | 1 |
| ERN1       | -0.0634171 | 1 |
| TP53I3     | -0.0557807 | 1 |
| HARS2      | -0.0493201 | 1 |
| GBGT1      | 0.0373417  | 1 |
| CLPP       | 0.0616276  | 1 |
| PTRH1      | -0.0020993 | 1 |
| AC004034.1 | 0.031282   | 1 |
| RER1       | 0.0378543  | 1 |
| ATL3       | 0.0270126  | 1 |
| GTF2F2     | 0.0354129  | 1 |
| TRIM61     | 0.0330103  | 1 |
| MDM4       | 0.024268   | 1 |
| KRBA2      | 0.0921232  | 1 |
| C9orf16    | 0.0822514  | 1 |
| DLG4       | -0.0367465 | 1 |

|            |            |   |
|------------|------------|---|
| EED        | -0.0217001 | 1 |
| LMAN2L     | 0.0305441  | 1 |
| NUS1       | -0.0420017 | 1 |
| GTF2F1     | -0.0394528 | 1 |
| CAPZA1     | -0.0550074 | 1 |
| MCM7       | 0.0270947  | 1 |
| SLC25A24   | 0.0117261  | 1 |
| MTFMT      | 0.0454161  | 1 |
| AFF3       | -0.0086504 | 1 |
| MYCNOS     | 0.035774   | 1 |
| APPL1      | -0.0138305 | 1 |
| PDSS2      | 0.0546474  | 1 |
| AAAS       | 0.0303297  | 1 |
| GOLPH3L    | -0.0305311 | 1 |
| PSMB10     | -0.0531514 | 1 |
| AC245297.3 | -0.0533959 | 1 |
| GNA12      | 0.0417333  | 1 |
| DIS3L2     | 0.0088343  | 1 |
| HYMAI      | 0.0262979  | 1 |
| HERC1      | -0.1021914 | 1 |
| CCDC186    | -0.1004043 | 1 |
| LIN54      | -0.0283453 | 1 |
| AP4E1      | -0.0081112 | 1 |
| ZNF816     | -0.0079113 | 1 |
| ZSCAN2     | -0.0433325 | 1 |
| HIST1H4E   | 0.0930807  | 1 |
| PARP6      | -0.0588313 | 1 |
| PTPMT1     | 0.0552548  | 1 |
| GPAA1      | -0.0233407 | 1 |
| CATSPERG   | 0.0150163  | 1 |
| RUFY3      | 0.0074896  | 1 |
| ZSCAN29    | 0.0529895  | 1 |
| AACS       | 0.0110522  | 1 |
| OSBPL5     | 0.0384753  | 1 |
| AZIN1-AS1  | 0.0347235  | 1 |
| EIF3K      | 0.0482113  | 1 |
| RAMAC      | -0.0400815 | 1 |
| SELL       | 0.0711292  | 1 |
| NSL1       | 0.0776824  | 1 |
| LSM12      | -0.0615974 | 1 |
| ANKS3      | 0.0426343  | 1 |
| IKBKG      | -0.0531998 | 1 |
| FOXP1-IT1  | 0.0353796  | 1 |
| FUBP1      | 0.0566893  | 1 |
| DHX35      | 0.0043716  | 1 |
| PDLIM5     | -0.0232915 | 1 |
| C11orf58   | -0.0508034 | 1 |
| TRAPPC9    | 0.0056474  | 1 |
| FAM24B     | -0.002163  | 1 |
| SLC25A14   | -0.0334293 | 1 |

|            |            |   |
|------------|------------|---|
| YDJC       | 0.0740246  | 1 |
| TMEM120A   | 0.0111344  | 1 |
| PYGO2      | -0.0196992 | 1 |
| ARPC3      | 0.0155017  | 1 |
| LINC02019  | -0.0443722 | 1 |
| NFU1       | 0.0183372  | 1 |
| SEC16A     | 0.0022961  | 1 |
| NMNAT1     | 0.0434903  | 1 |
| MAPK6      | -0.0396771 | 1 |
| PIGX       | 0.0124218  | 1 |
| DCP1B      | 0.0079137  | 1 |
| ZNF100     | 0.057534   | 1 |
| CIAO2B     | 0.0279961  | 1 |
| POLA1      | 0.0530212  | 1 |
| IFT88      | -0.0365535 | 1 |
| ERGIC3     | 0.0064793  | 1 |
| CBWD5      | 0.0223312  | 1 |
| STX18      | -0.0128892 | 1 |
| AC018647.2 | 0.0200777  | 1 |
| MCM6       | 0.0541518  | 1 |
| RAPGEF1    | 0.023252   | 1 |
| FBXL6      | -0.0258456 | 1 |
| B9D2       | -0.1160615 | 1 |
| CHERP      | 0.0223556  | 1 |
| CAMTA2     | 0.0101115  | 1 |
| POLD1      | 0.0347499  | 1 |
| TTC4       | 0.0158992  | 1 |
| NSDHL      | -0.0363074 | 1 |
| CDC23      | 0.0378096  | 1 |
| SLC25A37   | 0.0873086  | 1 |
| PSMD2      | 0.1106925  | 1 |
| ZNF17      | 0.0043073  | 1 |
| ZNF726     | -0.017632  | 1 |
| WDR5       | 0.0168489  | 1 |
| HSPBP1     | -0.0191617 | 1 |
| ABCF1      | -0.0477641 | 1 |
| PAPSS1     | 0.0657876  | 1 |
| ZNF484     | 0.0176544  | 1 |
| PTDSS2     | 0.0158466  | 1 |
| ADAP1      | -0.0764949 | 1 |
| PTBP1      | -0.0530702 | 1 |
| CHD3       | 0.0625129  | 1 |
| AC078883.1 | 0.0441848  | 1 |
| NPM2       | -0.011927  | 1 |
| MICU2      | 0.0057179  | 1 |
| PVR        | 0.0134694  | 1 |
| TJAP1      | -0.0203837 | 1 |
| PREP       | 0.0532025  | 1 |
| BOLA2B     | 0.0274163  | 1 |
| TMEM94     | 0.0596923  | 1 |

|            |            |   |
|------------|------------|---|
| BUD23      | -0.0147396 | 1 |
| NOMO3      | -0.0101429 | 1 |
| PTCD3      | 0.1067187  | 1 |
| ALKBH5     | 0.0577714  | 1 |
| COG7       | 0.0146821  | 1 |
| SHLD1      | -0.076522  | 1 |
| IL10RB     | -0.0238901 | 1 |
| BSCL2      | -0.0118412 | 1 |
| FUOM       | -0.1121326 | 1 |
| TMEM186    | 0.0461069  | 1 |
| CIAO1      | 0.1266238  | 1 |
| MAPKAPK3   | -0.0413599 | 1 |
| YTHDF2     | -0.0128827 | 1 |
| GATD1      | 0.0160635  | 1 |
| LPCAT4     | 0.0009493  | 1 |
| MLKL       | 0.0114325  | 1 |
| SUFU       | 0.002918   | 1 |
| DEF8       | -0.0571855 | 1 |
| UBE2E2     | 0.0674086  | 1 |
| ZC3H13     | 0.0651649  | 1 |
| BRD9       | -0.0217483 | 1 |
| POC5       | 0.0926733  | 1 |
| ZBTB40     | 0.0615646  | 1 |
| ZNF687     | -0.0383352 | 1 |
| INTU       | 0.0297574  | 1 |
| ZSCAN25    | 0.020267   | 1 |
| USP46      | -0.0129088 | 1 |
| FTCDNL1    | 0.0622044  | 1 |
| BTA1       | -0.0777581 | 1 |
| ZNF131     | 0.0579008  | 1 |
| ALKBH6     | 0.0012733  | 1 |
| HGSNAT     | 0.0192775  | 1 |
| GNB5       | 0.0558158  | 1 |
| FAM168A    | -0.0253873 | 1 |
| KLC2       | -0.0461653 | 1 |
| AC145285.6 | 8.132E-05  | 1 |
| EFNB1      | -0.0859919 | 1 |
| ZNF641     | -0.0161561 | 1 |
| PLEKHM2    | -0.0505578 | 1 |
| RAB10      | -0.0035165 | 1 |
| HECTD4     | -0.0242167 | 1 |
| NUCB1      | -0.1024695 | 1 |
| TXNL1      | -0.0283792 | 1 |
| NDUFC1     | 0.0251076  | 1 |
| NVL        | 0.0027304  | 1 |
| GBP2       | -0.0373035 | 1 |
| DELE1      | -0.0039624 | 1 |
| TRIP6      | 0.0185858  | 1 |
| AC025171.3 | -0.0269833 | 1 |
| SMNDC1     | 0.0360704  | 1 |

|            |            |   |
|------------|------------|---|
| TBC1D31    | 0.0289163  | 1 |
| ZNF836     | -0.0422448 | 1 |
| DHCR7      | -0.0144346 | 1 |
| LSM8       | 0.015497   | 1 |
| SCN1B      | 0.0025078  | 1 |
| HLA-DQA1   | -0.02145   | 1 |
| PIIP5K1    | 0.0272073  | 1 |
| DICER1-AS1 | 0.0405257  | 1 |
| ARIH2OS    | -0.0072281 | 1 |
| GPD2       | 0.0250061  | 1 |
| CALCOCO1   | -0.0303115 | 1 |
| TAF8       | -0.0329709 | 1 |
| SCAF1      | -0.0715924 | 1 |
| ENC1       | -0.0453752 | 1 |
| MIB2       | -0.007557  | 1 |
| PROK2      | 0.0239382  | 1 |
| NMD3       | 0.0071218  | 1 |
| DAPP1      | -0.0798576 | 1 |
| PHOSPHO2   | -0.0068772 | 1 |
| TPGS2      | -0.0124405 | 1 |
| COX16      | 0.0743942  | 1 |
| CPSF1      | 0.0105488  | 1 |
| SPATA20    | -0.0230307 | 1 |
| EDF1       | 0.0208839  | 1 |
| MED9       | -0.0697053 | 1 |
| NDUFAF7    | 0.0105453  | 1 |
| LTO1       | -0.0855426 | 1 |
| WDR34      | -0.0371436 | 1 |
| NICN1      | -0.0051549 | 1 |
| ZNF142     | 0.0128974  | 1 |
| ACO2       | -0.025421  | 1 |
| SFSWAP     | -0.0351937 | 1 |
| TPT1-AS1   | 0.0261904  | 1 |
| RAD51D     | 0.0487253  | 1 |
| AC015712.2 | 0.0138299  | 1 |
| BECN1      | 0.0434267  | 1 |
| KLHL28     | -0.1012926 | 1 |
| SNHG5      | 0.0678169  | 1 |
| TMEM71     | -0.0056024 | 1 |
| CCNYL1     | -0.0952241 | 1 |
| TAB1       | 0.0144775  | 1 |
| RPL8       | -0.0992627 | 1 |
| ZNF440     | 0.0176163  | 1 |
| CTSD       | 0.0624179  | 1 |
| SLC39A13   | -0.0410119 | 1 |
| SNU13      | -0.0141868 | 1 |
| ELOVL5     | -0.0516144 | 1 |
| C2orf76    | 0.0300362  | 1 |
| CLOCK      | 0.0316871  | 1 |
| ZNF335     | -0.0420386 | 1 |

|            |            |   |
|------------|------------|---|
| PSMA1      | 0.0116493  | 1 |
| ATP2A3     | -0.0258262 | 1 |
| TSPYL2     | 0.0415058  | 1 |
| AL133523.1 | 0.041183   | 1 |
| TRIM11     | -0.0656916 | 1 |
| ATG2B      | -0.0209063 | 1 |
| AC068587.4 | 0.0859805  | 1 |
| SLC12A9    | -0.0332201 | 1 |
| NUP50-DT   | 0.0272539  | 1 |
| FRMD4B     | -0.1308598 | 1 |
| AMN        | 0.0062234  | 1 |
| AL365295.1 | 0.0347264  | 1 |
| SMARCE1    | -0.0390825 | 1 |
| PYCARD     | 0.0139707  | 1 |
| GEMIN7     | -0.0129786 | 1 |
| RAB28      | 0.0173199  | 1 |
| IER3IP1    | 0.0528506  | 1 |
| AUP1       | -0.0786712 | 1 |
| ECT2       | 0.0164665  | 1 |
| PHLPP1     | -0.0002163 | 1 |
| PDK3       | -0.0036874 | 1 |
| RAD23A     | -0.0287723 | 1 |
| SLC4A2     | -0.0240729 | 1 |
| PIH1D1     | 0.0335054  | 1 |
| EIF3C      | 0.0253282  | 1 |
| CFL2       | 0.0263002  | 1 |
| AC040970.1 | -0.0008295 | 1 |
| GUSB       | -0.0385219 | 1 |
| AC141424.1 | 0.0367762  | 1 |
| PPIA       | 0.0344959  | 1 |
| NCK2       | 0.0517072  | 1 |
| OTUD3      | -0.0015568 | 1 |
| TSPAN14    | -0.0435978 | 1 |
| KIAA1328   | -0.0018091 | 1 |
| PRC1       | -0.0410945 | 1 |
| KDELR1     | 0.0781255  | 1 |
| TCEAL8     | 0.0159814  | 1 |
| MERTK      | 0.0417084  | 1 |
| BEND5      | 0.0430794  | 1 |
| PUSL1      | -0.0043046 | 1 |
| MANBAL     | -0.0727689 | 1 |
| WSB2       | -0.0261509 | 1 |
| PPP2R1B    | -0.0223964 | 1 |
| AGO4       | 0.0234903  | 1 |
| CDK5RAP3   | 0.0105109  | 1 |
| PGGT1B     | 0.0445983  | 1 |
| DCUN1D4    | 0.0043515  | 1 |
| BANP       | -0.017622  | 1 |
| DGCR8      | 0.0010183  | 1 |
| KMT2D      | -0.0031416 | 1 |

|            |            |   |
|------------|------------|---|
| AC083798.2 | 0.0184741  | 1 |
| PHF12      | -0.085737  | 1 |
| MED20      | -0.0001685 | 1 |
| LRRC8C-DT  | -0.0003658 | 1 |
| ZNF768     | -0.0200398 | 1 |
| PTPN11     | 0.0556138  | 1 |
| UVSSA      | 0.036463   | 1 |
| CWF19L1    | -0.0559507 | 1 |
| NUTM2B-AS  | 0.0493753  | 1 |
| KDM2B      | -0.000191  | 1 |
| AC008764.8 | 0.0366215  | 1 |
| ZNF696     | 0.0151663  | 1 |
| MKS1       | 0.0280033  | 1 |
| VTI1B      | 0.0749386  | 1 |
| PHC3       | 0.0100819  | 1 |
| PNPLA6     | -0.0772605 | 1 |
| CRAT       | 0.0161128  | 1 |
| CDKAL1     | 0.0403824  | 1 |
| IL12RB1    | -0.0415867 | 1 |
| ZDHHC17    | -0.0002397 | 1 |
| RTL8A      | 0.0076768  | 1 |
| IL17RC     | -0.0222174 | 1 |
| MIATNB     | 0.029282   | 1 |
| RENBP      | 0.0024432  | 1 |
| PRAF2      | -0.048545  | 1 |
| KIFAP3     | -0.0346146 | 1 |
| ZBTB11     | -0.0231527 | 1 |
| RNF121     | 0.0124389  | 1 |
| IDH3G      | 0.0197891  | 1 |
| COX7A2     | 0.025762   | 1 |
| SEC22A     | -0.0387834 | 1 |
| DAPK3      | -0.0414763 | 1 |
| TNRC6C-AS  | -0.0259664 | 1 |
| AC018521.5 | 0.0227423  | 1 |
| MAST2      | -0.000169  | 1 |
| NAPA-AS1   | 0.0012626  | 1 |
| DYM        | 0.0752826  | 1 |
| SEPSECS-A  | 0.0429769  | 1 |
| TMEM129    | -0.0151174 | 1 |
| LRG1       | 0.0155416  | 1 |
| NMRK1      | 0.034463   | 1 |
| ZNF10      | 0.0014407  | 1 |
| ABCB8      | -0.0624433 | 1 |
| MUTYH      | 0.0231461  | 1 |
| TBCD       | 0.0396562  | 1 |
| LRP12      | 0.0108268  | 1 |
| DUS3L      | -0.0104148 | 1 |
| ARFGEF2    | -0.1130945 | 1 |
| MRPL20-AS  | -0.0330964 | 1 |
| CPLANE1    | 0.0422444  | 1 |



|            |            |   |
|------------|------------|---|
| CSRP1      | -0.0176743 | 1 |
| URB2       | 0.022238   | 1 |
| SEPTIN6    | 0.1147175  | 1 |
| NUTM2A-AS  | -0.0076591 | 1 |
| GRHPR      | 0.0269469  | 1 |
| ATP5IF1    | -0.0036377 | 1 |
| TCF20      | 0.0234227  | 1 |
| SEC23B     | -0.0036011 | 1 |
| SPTY2D1    | -0.0956769 | 1 |
| LAMTOR5-A  | 0.0264506  | 1 |
| PMAIP1     | -0.0511442 | 1 |
| SNX20      | 0.0657549  | 1 |
| UBFD1      | 0.05534    | 1 |
| SLF2       | 0.0323478  | 1 |
| ZNF12      | -0.0151476 | 1 |
| USP20      | 0.0171577  | 1 |
| GPT2       | -0.064341  | 1 |
| ADAT1      | 0.0106262  | 1 |
| SIPA1L3    | 0.0553635  | 1 |
| CEP68      | 0.0203154  | 1 |
| ZNF839     | 0.0172596  | 1 |
| PRKCH      | -0.0621822 | 1 |
| LEMD2      | -0.0221301 | 1 |
| FASTKD3    | 0.0293222  | 1 |
| MIER3      | -0.013746  | 1 |
| ZBTB7B     | -0.0084023 | 1 |
| C4orf33    | 0.0398385  | 1 |
| AC025181.2 | -0.0345222 | 1 |
| KCNMB1     | 0.0106832  | 1 |
| NFYA       | 0.025875   | 1 |
| MPV17L2    | 0.0148116  | 1 |
| MAP4K2     | -0.062554  | 1 |
| RTRAF      | 0.077731   | 1 |
| RAPGEF6    | -0.0492011 | 1 |
| CENPBD1    | 0.0413715  | 1 |
| SPATA5L1   | -0.0016189 | 1 |
| ADGRG3     | -0.0361985 | 1 |
| ARRDC4     | 0.0379009  | 1 |
| MAPKAPK5   | 0.0244378  | 1 |
| DMXL2      | 0.002034   | 1 |
| PYROXD1    | -0.0009792 | 1 |
| GGH        | 0.0045972  | 1 |
| ZNF236     | -0.043181  | 1 |
| RTL10      | 0.0139352  | 1 |
| FAM215B    | 0.0013447  | 1 |
| PREX1      | 0.0524274  | 1 |
| ZNF219     | 0.0121219  | 1 |
| PITPNB     | -0.0097258 | 1 |
| PAG1       | 0.0100697  | 1 |
| CHD6       | 0.0172388  | 1 |

|            |            |   |
|------------|------------|---|
| JDP2       | -0.0343296 | 1 |
| BUB1B      | 0.0272938  | 1 |
| GPATCH3    | -0.0149777 | 1 |
| AC005838.2 | 0.0273232  | 1 |
| OSBPL2     | -0.0178051 | 1 |
| TNS3       | -0.0111893 | 1 |
| S100A13    | -0.0706191 | 1 |
| AL353807.5 | 0.0194563  | 1 |
| TMEM87A    | -0.0381291 | 1 |
| PRRC2A     | 0.0150444  | 1 |
| RPS19      | 0.0081171  | 1 |
| FADS2      | 0.058113   | 1 |
| FUT4       | -5.299E-05 | 1 |
| HTRA2      | 0.0275282  | 1 |
| PDP1       | -0.0777258 | 1 |
| THOC5      | 0.0456212  | 1 |
| TENT4A     | -0.0389302 | 1 |
| TBC1D9B    | 0.0692117  | 1 |
| TMEM39A    | -0.0318963 | 1 |
| COMMD2     | -0.0387239 | 1 |
| CCNB1IP1   | 0.0381139  | 1 |
| IDUA       | -0.017962  | 1 |
| SEPHS1     | 0.0412363  | 1 |
| ENTPD4     | -0.0392681 | 1 |
| SPN        | 0.0966442  | 1 |
| MPRIP      | 0.0200163  | 1 |
| LZTR1      | -0.0117298 | 1 |
| MTO1       | 0.0104245  | 1 |
| TTPAL      | -0.0258413 | 1 |
| ZNF500     | 0.0302976  | 1 |
| TOMM70     | 0.0889212  | 1 |
| DHX16      | 0.0093776  | 1 |
| AC004812.2 | -0.0298044 | 1 |
| SHARPIN    | -0.0153508 | 1 |
| RPS6KB2    | -0.0387005 | 1 |
| MAP2K7     | -0.0099886 | 1 |
| AC073111.4 | 0.0110712  | 1 |
| DCAF10     | 0.0609369  | 1 |
| PRKRA      | -0.0357646 | 1 |
| ZNF468     | -0.0199137 | 1 |
| WDTC1      | 0.0300553  | 1 |
| ZPR1       | 0.0249436  | 1 |
| MRPS35     | 0.0152111  | 1 |
| UFD1       | -0.0605101 | 1 |
| BAG5       | 0.0800173  | 1 |
| STAT5B     | 0.0295881  | 1 |
| FBXL8      | 0.0440599  | 1 |
| CRYZ       | 0.0572039  | 1 |
| PCNX3      | -0.0200921 | 1 |
| SMARCD2    | -0.0293996 | 1 |

|            |            |   |
|------------|------------|---|
| TRIM13     | -0.0571189 | 1 |
| HNRNPA0    | -0.1177958 | 1 |
| GMPPA      | 0.0044139  | 1 |
| GBP3       | 0.0130176  | 1 |
| CYB561A3   | -0.0192538 | 1 |
| MRPL23     | 0.1048525  | 1 |
| MAGED2     | -0.0133789 | 1 |
| AIG1       | -0.0105991 | 1 |
| EEF1B2     | 0.0285186  | 1 |
| ARHGEF18   | -0.007493  | 1 |
| ZNF852     | 0.0449152  | 1 |
| ERV3-1     | 0.0503202  | 1 |
| ZNF330     | -0.0385343 | 1 |
| SLC35C1    | -0.0360865 | 1 |
| PGD        | 0.057058   | 1 |
| CCDC7      | 0.042613   | 1 |
| ATPAF1     | 0.0455134  | 1 |
| TMED2      | -0.043137  | 1 |
| DNAJB9     | -0.0299196 | 1 |
| AC016876.1 | 0.0177016  | 1 |
| FEN1       | 0.0125935  | 1 |
| NCOA6      | 0.0455309  | 1 |
| FAM229B    | -0.0510683 | 1 |
| NEK4       | 0.0503923  | 1 |
| BTN2A2     | 0.0106273  | 1 |
| RECK       | -0.0212623 | 1 |
| EMILIN1    | 0.0361792  | 1 |
| ORMDL3     | 0.0484437  | 1 |
| SRGAP2     | 0.0164339  | 1 |
| SKIV2L     | 0.0022274  | 1 |
| BTBD3      | -0.0560189 | 1 |
| MTCH2      | 0.0231527  | 1 |
| IPO4       | 0.0242835  | 1 |
| AC015871.1 | 0.019291   | 1 |
| SLC25A16   | -0.0353417 | 1 |
| DNAJB2     | -0.0436299 | 1 |
| HLA-DQA2   | -3.725E-05 | 1 |
| RIOX1      | -0.0210185 | 1 |
| SMIM3      | -0.0780454 | 1 |
| NECAP2     | -0.1090091 | 1 |
| UBR7       | 0.0059979  | 1 |
| SERTAD2    | -0.0227076 | 1 |
| IQCE       | 0.0075697  | 1 |
| MARK4      | -0.0368665 | 1 |
| HDAC3      | 0.0083755  | 1 |
| ATP5MG     | 0.0264046  | 1 |
| PANX2      | 0.0132303  | 1 |
| C16orf91   | 0.011454   | 1 |
| TMEM33     | -0.0025262 | 1 |
| AP002495.1 | 0.035065   | 1 |

|            |            |   |
|------------|------------|---|
| TRIM69     | -0.0016529 | 1 |
| KIF2A      | 0.0276809  | 1 |
| ZNF644     | -0.0145813 | 1 |
| OBSL1      | 0.0282621  | 1 |
| NAA15      | -0.0358745 | 1 |
| CYCS       | -0.0244509 | 1 |
| CMTR2      | -0.0273906 | 1 |
| TCF25      | 0.0557813  | 1 |
| AC144521.1 | 0.0129062  | 1 |
| MAP3K20    | 0.0145531  | 1 |
| SUMF2      | 0.043178   | 1 |
| PPP2R1A    | -0.0493506 | 1 |
| DLGAP1-AS  | 0.0049049  | 1 |
| STRN3      | -0.0211361 | 1 |
| CSNK1G1    | -0.0560944 | 1 |
| CBWD1      | -0.000355  | 1 |
| UPRT       | -0.0013589 | 1 |
| AL392172.1 | 0.0261856  | 1 |
| CYB5R4     | 0.0460815  | 1 |
| C12orf43   | -0.0179027 | 1 |
| FAM78A     | -0.0511353 | 1 |
| ATN1       | -0.0141492 | 1 |
| WNK1       | 0.0268742  | 1 |
| ZNF107     | 0.0560577  | 1 |
| RFX3       | 0.0320773  | 1 |
| ZNF282     | -0.0404115 | 1 |
| WAKMAR2    | 0.0163854  | 1 |
| CLIP1      | -0.0099331 | 1 |
| TTC33      | 0.0133501  | 1 |
| KLF4       | -0.1225199 | 1 |
| PPM1L      | -0.0260407 | 1 |
| AP2A1      | 0.0032404  | 1 |
| ACTR3C     | 0.024167   | 1 |
| PLCXD1     | 0.0337667  | 1 |
| GSTM5      | 0.0230735  | 1 |
| LMLN       | 0.0173537  | 1 |
| ABAT       | 0.0288621  | 1 |
| CCP110     | -0.0165125 | 1 |
| ANKS1A     | -0.0535724 | 1 |
| GOSR2      | -0.008907  | 1 |
| CXorf40B   | -0.0446493 | 1 |
| SYNJ1      | -0.053854  | 1 |
| SMC3       | 0.0574434  | 1 |
| KHDRBS1    | -0.0729749 | 1 |
| XPO6       | 0.0538827  | 1 |
| SETX       | -0.0290361 | 1 |
| POLR1D     | 0.0219204  | 1 |
| CERS5      | -0.0314527 | 1 |
| ZBED5      | 0.0216199  | 1 |
| MED26      | -0.0325899 | 1 |

|            |            |   |
|------------|------------|---|
| ARPC1B     | -0.1119518 | 1 |
| KLF2       | -0.2515821 | 1 |
| ANKRD13C   | 0.0195234  | 1 |
| EIF4G1     | 0.0918654  | 1 |
| ZNF561     | 0.0223591  | 1 |
| SMG8       | -0.0100387 | 1 |
| MORC3      | -0.089886  | 1 |
| KLHL2      | -0.0246066 | 1 |
| SNX14      | 0.0352187  | 1 |
| PTPN4      | 0.0408963  | 1 |
| RALBP1     | 0.0359086  | 1 |
| RCOR3      | 0.0548329  | 1 |
| SNAPC2     | -0.0775128 | 1 |
| MAP3K2-DT  | 0.0467498  | 1 |
| GRWD1      | 0.019467   | 1 |
| MDGA1      | 0.0181463  | 1 |
| UBA52      | -0.0155234 | 1 |
| NR2C2      | -0.0361385 | 1 |
| VPS35      | -0.0628688 | 1 |
| FARP2      | -0.0002766 | 1 |
| LAMB2      | -0.0250078 | 1 |
| LETMD1     | 0.0314445  | 1 |
| AC123768.4 | 0.0280268  | 1 |
| ABLIM1     | 0.0095352  | 1 |
| ZADH2      | 0.057667   | 1 |
| USO1       | 0.1341494  | 1 |
| ZNF417     | 0.0226355  | 1 |
| POLG2      | 0.0146779  | 1 |
| MED28      | 0.0192198  | 1 |
| PRPF38B    | 0.1189187  | 1 |
| NUBPL      | 0.0384009  | 1 |
| PEX11B     | -0.0461386 | 1 |
| DDX56      | -0.0324636 | 1 |
| HIST2H2AA4 | -0.0195429 | 1 |
| SNHG19     | -0.0333354 | 1 |
| AC015871.7 | -0.0186829 | 1 |
| YARS       | 0.0407099  | 1 |
| AC005921.2 | -0.0237589 | 1 |
| AGAP2      | -0.0320503 | 1 |
| DPM3       | -0.0105619 | 1 |
| RAB31      | -0.0799473 | 1 |
| ORC5       | 0.0121927  | 1 |
| TBC1D17    | 0.0175314  | 1 |
| AC002558.3 | -0.0123369 | 1 |
| MRPL37     | 0.0069983  | 1 |
| CRYBG1     | 0.0029313  | 1 |
| ZNF250     | 0.006254   | 1 |
| SLC35A5    | 0.0387545  | 1 |
| TUBGCP6    | -0.0026971 | 1 |
| MLLT6      | 0.0358596  | 1 |

|            |            |   |
|------------|------------|---|
| SNRPB      | -0.1339788 | 1 |
| CRAMP1     | 0.008208   | 1 |
| S100A9     | -0.0731295 | 1 |
| NELFCD     | -0.0576501 | 1 |
| DIP2B      | 0.0285258  | 1 |
| NBPF11     | 0.0121677  | 1 |
| TMEM25     | 0.0062353  | 1 |
| LZTS2      | -0.0595525 | 1 |
| DCAF6      | -0.0135313 | 1 |
| NT5C2      | 0.0046048  | 1 |
| LHPP       | -0.0391924 | 1 |
| RNF115     | -0.0272963 | 1 |
| CNOT3      | -0.0090017 | 1 |
| RPL10      | -0.0559733 | 1 |
| RPN2       | -0.0082928 | 1 |
| CASP2      | 0.0081129  | 1 |
| CEBPD      | 0.039291   | 1 |
| MTHFR      | 0.0063313  | 1 |
| TM9SF3     | -0.0740711 | 1 |
| NOP9       | 0.000235   | 1 |
| ATAD2B     | -0.0987281 | 1 |
| CRELD1     | 0.0241921  | 1 |
| MFSD14B    | -0.0078866 | 1 |
| DDX59      | -0.0156517 | 1 |
| AC099343.3 | 0.0102601  | 1 |
| EXD2       | 0.0266841  | 1 |
| CTNNA1     | 0.0288394  | 1 |
| MSL2       | 0.0452596  | 1 |
| CCDC32     | -0.0096939 | 1 |
| AC016949.1 | -0.0423043 | 1 |
| TWSG1      | -0.014893  | 1 |
| LARS2      | -0.0003959 | 1 |
| CLASP1     | 0.0271766  | 1 |
| OCRL       | -0.0063909 | 1 |
| TMEM175    | -0.0190592 | 1 |
| UGDH       | 0.0263071  | 1 |
| APOBEC3G   | -0.0075757 | 1 |
| ACRBP      | -0.0222114 | 1 |
| USP8       | -0.0325996 | 1 |
| KIF9-AS1   | 0.0302329  | 1 |
| SLC7A6     | -0.0655194 | 1 |
| ARIH2      | -0.0250885 | 1 |
| RAP2A      | -0.0012306 | 1 |
| C12orf49   | -0.0088709 | 1 |
| PACS1      | 0.0003706  | 1 |
| TRIP4      | -0.020722  | 1 |
| POLR3F     | -0.0339401 | 1 |
| DNM1       | 0.0123032  | 1 |
| SSR4       | 0.0118828  | 1 |
| TRIM41     | -0.0347893 | 1 |

|            |            |   |
|------------|------------|---|
| ACAD11     | -0.0063207 | 1 |
| PTPA       | -0.0335802 | 1 |
| NPLOC4     | -0.0479967 | 1 |
| ARFGAP1    | -0.0510384 | 1 |
| AP5M1      | 0.025179   | 1 |
| RASA1      | 0.0337612  | 1 |
| ZW10       | 0.0256081  | 1 |
| TP53INP1   | -0.0238517 | 1 |
| NUP160     | -0.0111445 | 1 |
| ZC3H3      | -0.0402138 | 1 |
| RTP4       | 0.0368791  | 1 |
| ARMH3      | -0.0300276 | 1 |
| ACTR8      | -0.0017788 | 1 |
| COPS7B     | -0.0110337 | 1 |
| DDX42      | 0.0589638  | 1 |
| COMMD7     | -0.085562  | 1 |
| POGLUT3    | 0.0191959  | 1 |
| PIK3CD     | 0.0385155  | 1 |
| AKR1B1     | 0.0065143  | 1 |
| ZNF888     | -0.0903802 | 1 |
| MRPS36     | 0.0735601  | 1 |
| UBXN2B     | -0.0162309 | 1 |
| RPLP1      | 0.0366694  | 1 |
| MAN1B1     | -0.0062276 | 1 |
| ARMC8      | -0.0746677 | 1 |
| LINC00963  | 0.0090922  | 1 |
| HIVEP3     | 0.0173926  | 1 |
| WASL       | 0.0038193  | 1 |
| SDHB       | 0.0355334  | 1 |
| NFX1       | -0.0093508 | 1 |
| IMPAD1     | -0.049929  | 1 |
| VPS13B-DT  | 0.0229311  | 1 |
| SLC2A11    | 0.0244258  | 1 |
| LRRC41     | -0.0039128 | 1 |
| ZNF77      | 0.0246659  | 1 |
| SLC25A1    | 0.0219581  | 1 |
| IPO11      | -0.0481019 | 1 |
| UFM1       | 0.0553698  | 1 |
| CSTF3      | 0.0588795  | 1 |
| NOCT       | 0.0173057  | 1 |
| TRMT12     | 0.0255808  | 1 |
| AC090517.5 | 0.0288975  | 1 |
| XRN1       | -0.0334433 | 1 |
| C3orf62    | -0.057183  | 1 |
| GK         | -0.0206524 | 1 |
| DGCR2      | 0.0041241  | 1 |
| FASTKD5    | 0.0167435  | 1 |
| RAB21      | -0.1105485 | 1 |
| BAHD1      | -0.0548482 | 1 |
| AC073896.2 | -0.0013918 | 1 |

|            |            |   |
|------------|------------|---|
| TSPYL4     | 0.0065181  | 1 |
| DOP1A      | -0.0319585 | 1 |
| PLCB2      | -0.0127671 | 1 |
| TTI2       | 0.0133876  | 1 |
| METTL3     | 0.0374979  | 1 |
| COX7B      | 0.0663443  | 1 |
| FAM8A1     | 0.0125994  | 1 |
| PABPC1L    | -0.0299188 | 1 |
| SMN1       | -0.0137824 | 1 |
| KIF22      | 0.0192963  | 1 |
| MTF1       | -0.0373569 | 1 |
| COPG1      | -0.0043004 | 1 |
| MFSD11     | -0.0275219 | 1 |
| BBS9       | 0.0121902  | 1 |
| CCHCR1     | 0.0355613  | 1 |
| IPO13      | 0.0286784  | 1 |
| ZBTB45     | -0.0416709 | 1 |
| ZKSCAN8    | -0.0143947 | 1 |
| PAQR6      | 0.0158044  | 1 |
| YIPF4      | -0.0627796 | 1 |
| TGFBRAP1   | -0.0379655 | 1 |
| E2F5       | -0.000307  | 1 |
| DNAJC15    | -0.0515408 | 1 |
| ZG16B      | -0.017397  | 1 |
| ASNSD1     | 0.0396113  | 1 |
| RRAS       | -0.0491451 | 1 |
| TKFC       | 0.0057744  | 1 |
| ANKZF1     | 0.0364708  | 1 |
| MYO5C      | -0.0062314 | 1 |
| RBM15      | 0.0103736  | 1 |
| TRIM52-AS1 | -0.0625662 | 1 |
| EIF4B      | -0.0022968 | 1 |
| LRRC8B     | -0.0661283 | 1 |
| TBCCD1     | 0.0129099  | 1 |
| ATP5F1E    | 0.0770634  | 1 |
| ZCCHC2     | -0.0397766 | 1 |
| ZNF749     | 0.0100029  | 1 |
| MSRA       | -0.049543  | 1 |
| SH2B1      | 0.0090739  | 1 |
| WDR44      | -0.0640478 | 1 |
| MFN2       | -0.0262269 | 1 |
| RFC1       | -0.0649391 | 1 |
| PSENN      | -0.0350961 | 1 |
| MED18      | 0.0405953  | 1 |
| NIBAN1     | -0.0009535 | 1 |
| TAFA2      | -0.0055564 | 1 |
| TOMM22     | 0.0567157  | 1 |
| UQCRC1     | -0.0682448 | 1 |
| R3HCC1     | 0.0384826  | 1 |
| ZMYM2      | -0.0615681 | 1 |



|          |            |   |
|----------|------------|---|
| THAP1    | 0.0154301  | 1 |
| TRNT1    | 0.0097566  | 1 |
| ZNF268   | -0.0002122 | 1 |
| MMUT     | 0.0287242  | 1 |
| FAM13B   | -0.0359041 | 1 |
| KDM5A    | -0.0950904 | 1 |
| SLC66A3  | 0.0721837  | 1 |
| USF3     | -0.0206738 | 1 |
| CEP95    | -0.0450784 | 1 |
| ID2      | -0.0909474 | 1 |
| RCBTB1   | 0.0635199  | 1 |
| ZDHHC16  | 0.0184996  | 1 |
| IFI44    | 0.0385022  | 1 |
| DPH3     | -0.0675557 | 1 |
| KCTD3    | -0.0192012 | 1 |
| ZNF180   | 0.0234487  | 1 |
| MOV10    | -0.0339996 | 1 |
| LKAAEAR1 | 0.0193516  | 1 |
| TAF13    | -0.0397922 | 1 |
| ADGRG5   | -0.0629569 | 1 |
| ABHD11   | -0.0194148 | 1 |
| INPP5K   | -0.0079889 | 1 |
| LMO7     | 0.0362806  | 1 |
| C1orf54  | -0.0325723 | 1 |
| RBM4B    | 0.0384769  | 1 |
| PTTG1IP  | 0.0590369  | 1 |
| POLM     | 0.0057312  | 1 |
| SERP1    | 0.0955686  | 1 |
| PEX3     | 0.0254482  | 1 |
| TRAF3IP3 | 0.0776266  | 1 |
| SLC66A1  | -0.0231104 | 1 |
| SLC29A3  | 0.0219309  | 1 |
| TRUB1    | 0.0334871  | 1 |
| BCL7C    | -0.0693575 | 1 |
| TAB2     | -0.0516916 | 1 |
| ESRRA    | 0.0247309  | 1 |
| VKORC1   | 0.1192906  | 1 |
| STRN     | -0.011466  | 1 |
| CENPS    | 0.0017269  | 1 |
| SCMH1    | 0.035027   | 1 |
| C16orf86 | 0.0181207  | 1 |
| KLF7     | 0.003417   | 1 |
| SNX1     | -0.0272061 | 1 |
| GTPBP8   | 0.0069358  | 1 |
| PRPS1    | -0.0568776 | 1 |
| GRAP     | -0.0335182 | 1 |
| AKR7A2   | 0.0875529  | 1 |
| SSR2     | -0.0110925 | 1 |
| TAP2     | 0.0015924  | 1 |
| TBC1D2   | -0.0320703 | 1 |

|            |            |   |
|------------|------------|---|
| CBLL1      | -0.0482701 | 1 |
| EFCAB7     | 0.0249922  | 1 |
| CREBBP     | -0.0178026 | 1 |
| CCNG1      | -0.0921151 | 1 |
| LSM11      | 0.0335728  | 1 |
| CALCOCO2   | -0.0242597 | 1 |
| CDT1       | -0.1407949 | 1 |
| SMPD4      | -0.0723576 | 1 |
| GTF2H4     | 0.014886   | 1 |
| CFAP410    | 0.0242248  | 1 |
| NQO1       | -0.0143218 | 1 |
| SUPT3H     | 0.0337354  | 1 |
| PLOD3      | -0.0407307 | 1 |
| SUPT6H     | -0.0713045 | 1 |
| PGLS       | -0.0803854 | 1 |
| DNAL1      | -0.0872017 | 1 |
| ACAD8      | 0.0320628  | 1 |
| SEC24D     | -0.0149268 | 1 |
| IFT43      | -0.0246788 | 1 |
| HSPA9      | 0.1063297  | 1 |
| DBR1       | 0.0271704  | 1 |
| ERCC3      | 0.0353234  | 1 |
| GAB1       | 0.0256152  | 1 |
| NXF1       | -0.0079668 | 1 |
| KAT2B      | -0.0134798 | 1 |
| RNF24      | -0.018652  | 1 |
| SH3RF1     | -0.0676099 | 1 |
| B4GALT4    | -0.0130484 | 1 |
| COTL1      | -0.0537754 | 1 |
| LCMT1      | 0.0097552  | 1 |
| EIF3L      | 0.0145716  | 1 |
| FUNDC2     | 0.0376616  | 1 |
| BSPRY      | 0.0409411  | 1 |
| IRS2       | 0.0022766  | 1 |
| CLP1       | -0.024279  | 1 |
| HOXA9      | 0.054566   | 1 |
| WDR91      | -0.0029798 | 1 |
| MOB1B      | -0.0170562 | 1 |
| AC091271.1 | -0.0241869 | 1 |
| INSIG2     | -0.0294383 | 1 |
| MINDY3     | -0.0580133 | 1 |
| PHC1       | -0.0131867 | 1 |
| INO80D     | -0.032405  | 1 |
| INTS4      | 0.0220515  | 1 |
| DPP3       | 0.0080069  | 1 |
| NAA25      | 0.0296135  | 1 |
| FXR2       | -0.0611149 | 1 |
| AC092279.1 | 0.0004518  | 1 |
| POGLUT2    | 0.0177735  | 1 |
| MAZ        | 0.059249   | 1 |

|            |            |   |
|------------|------------|---|
| RNF141     | 0.0093207  | 1 |
| DNAJC18    | -0.0327976 | 1 |
| SEC23A     | -0.1092643 | 1 |
| YTHDF1     | -0.0506708 | 1 |
| RASAL3     | -0.0313426 | 1 |
| MAP4K1     | -0.0035898 | 1 |
| RUSC1      | -0.029014  | 1 |
| ESS2       | -0.0664162 | 1 |
| POP1       | 0.0207344  | 1 |
| ITGB1BP1   | -0.0731114 | 1 |
| AC120053.1 | 0.03304    | 1 |
| RABGAP1L   | -0.0094499 | 1 |
| DDX49      | 0.0059557  | 1 |
| PCGF5      | -0.0476365 | 1 |
| TSC2       | -0.0364666 | 1 |
| C3AR1      | 0.0347301  | 1 |
| YTHDF3-AS  | -0.0389916 | 1 |
| CD180      | 0.0565318  | 1 |
| TNFSF13    | -0.0924368 | 1 |
| ZNF875     | 0.010388   | 1 |
| KIAA2026   | -0.0104716 | 1 |
| LIN37      | -0.0407626 | 1 |
| ZNF140     | -0.057596  | 1 |
| RBM48      | 0.0216697  | 1 |
| TMEM205    | -0.0524381 | 1 |
| AC007114.1 | 0.0514486  | 1 |
| TMEM53     | -0.0158892 | 1 |
| SLC9A7     | -0.011523  | 1 |
| PHRF1      | -0.0137487 | 1 |
| MLH1       | -0.0284598 | 1 |
| ADHFE1     | 0.0318773  | 1 |
| NAAA       | -0.0368573 | 1 |
| MOB1A      | -0.1262134 | 1 |
| TRIM34     | 0.0788015  | 1 |
| ENPP2      | 0.0024273  | 1 |
| INAFM2     | 0.0296941  | 1 |
| KAT2A      | -0.0098729 | 1 |
| DZANK1     | 0.0234184  | 1 |
| KLHL20     | -0.0089634 | 1 |
| ABHD12     | 0.0013856  | 1 |
| KLRG1      | 0.0304577  | 1 |
| HNRNPR     | 0.1091     | 1 |
| TTC7A      | -0.0245967 | 1 |
| IMPA1      | 0.0067775  | 1 |
| DUSP6      | -0.1445252 | 1 |
| ZBTB10     | 0.0043887  | 1 |
| PLAGL2     | -0.0204577 | 1 |
| EPS15L1    | 0.01287    | 1 |
| FAAP100    | 0.0059145  | 1 |
| AC004241.1 | -0.029771  | 1 |

|            |            |   |
|------------|------------|---|
| ARHGEF17   | -0.0306216 | 1 |
| RAB18      | -0.0569932 | 1 |
| OPRL1      | -0.0005014 | 1 |
| NPC1       | -0.0454199 | 1 |
| GRIK5      | -0.0177816 | 1 |
| MCAT       | -0.0560142 | 1 |
| MAP4K3     | -0.0326199 | 1 |
| AL161457.2 | 0.0060145  | 1 |
| SEPTIN7    | -0.0498508 | 1 |
| SCYL3      | -0.0046303 | 1 |
| BCKDK      | -0.002257  | 1 |
| NUDT3      | 0.0416001  | 1 |
| SLFN13     | -0.0046467 | 1 |
| RING1      | -0.01428   | 1 |
| ALOX12-AS1 | 0.0037246  | 1 |
| BLOC1S6    | 0.015351   | 1 |
| AGTPBP1    | 0.0069161  | 1 |
| SLC31A1    | -0.0387314 | 1 |
| TECPR2     | 0.0304624  | 1 |
| SEC24A     | -0.0537089 | 1 |
| ARNTL2     | 0.0083642  | 1 |
| ABHD4      | 0.0050915  | 1 |
| TMEM250    | -0.0700482 | 1 |
| SH3BP4     | -0.0380771 | 1 |
| UNC119     | 0.0065593  | 1 |
| ANP32A     | 0.077572   | 1 |
| TRAF2      | -0.0280176 | 1 |
| KLHL7      | -0.0505557 | 1 |
| PRRC2B     | -0.0320189 | 1 |
| SREBF2     | -0.0952209 | 1 |
| EMILIN2    | 0.0511358  | 1 |
| HEXD-IT1   | 0.010163   | 1 |
| LRWD1      | 0.0082535  | 1 |
| AL353194.1 | 0.0129965  | 1 |
| AC005332.6 | 0.0047053  | 1 |
| NAPRT      | -0.0161536 | 1 |
| TDP2       | 0.0040704  | 1 |
| C6orf136   | -0.0180523 | 1 |
| SLC27A3    | 0.0250484  | 1 |
| AC010615.2 | 0.0255006  | 1 |
| ADAMTSL4   | 0.0013793  | 1 |
| RB1        | 0.1088664  | 1 |
| CPNE2      | -0.0135616 | 1 |
| LRP8       | 0.0026167  | 1 |
| HOXA10     | -0.0052681 | 1 |
| PPOX       | -0.0044058 | 1 |
| RHOB       | -0.0797961 | 1 |
| PARD6A     | -0.0580434 | 1 |
| ACSL1      | -0.0001906 | 1 |
| GALC       | 0.0126294  | 1 |

|            |            |   |
|------------|------------|---|
| TMLHE      | 0.0356019  | 1 |
| C11orf71   | -0.046922  | 1 |
| ZNF671     | -0.0221689 | 1 |
| GON4L      | -0.1220892 | 1 |
| MLLT10     | 0.0598808  | 1 |
| AP000873.2 | 0.0351789  | 1 |
| CCNT1      | 0.0034941  | 1 |
| TBC1D20    | -0.0264606 | 1 |
| LIMS1      | -0.0151142 | 1 |
| FBXO8      | -0.0372998 | 1 |
| POLR2M     | -0.0132235 | 1 |
| TBPL1      | -0.0028695 | 1 |
| GYS1       | 0.0345453  | 1 |
| ATAT1      | -0.004272  | 1 |
| SPATA7     | 0.0149053  | 1 |
| DPP9       | -0.0287148 | 1 |
| POLR2C     | -0.021952  | 1 |
| LINS1      | 0.0012065  | 1 |
| ZNF76      | 0.0120936  | 1 |
| TM9SF1     | -0.0761598 | 1 |
| SAP30L     | 0.0100351  | 1 |
| ZNF688     | -0.0587526 | 1 |
| ANKRD33B   | -0.0234329 | 1 |
| STAT5A     | -0.0130881 | 1 |
| RTTN       | 0.0264243  | 1 |
| STARD3     | -0.0264672 | 1 |
| HIST1H1E   | 0.0613355  | 1 |
| SLC16A5    | -0.0423904 | 1 |
| MEF2C      | 0.1093025  | 1 |
| LPCAT3     | -0.0462704 | 1 |
| FLT3LG     | -0.0157354 | 1 |
| FASTKD2    | -0.0067265 | 1 |
| C18orf32   | -0.0561012 | 1 |
| FLVCR1     | 0.0089013  | 1 |
| NR4A2      | -0.0046329 | 1 |
| ELOB       | -0.0303642 | 1 |
| CALML4     | 0.020054   | 1 |
| FLVCR1-DT  | 0.0304373  | 1 |
| MPO        | 0.1573395  | 1 |
| ABCA2      | -0.0145899 | 1 |
| CGAS       | 0.0069909  | 1 |
| FRYL       | 0.0674852  | 1 |
| ODR4       | 0.0101831  | 1 |
| FCHSD1     | -0.0210329 | 1 |
| LMBR1      | 0.0085976  | 1 |
| EMC10      | 0.008627   | 1 |
| GSS        | 0.0467984  | 1 |
| FKBP11     | 0.0432693  | 1 |
| ICA1L      | -0.0260041 | 1 |
| MYLPF      | -0.0095997 | 1 |

|            |            |   |
|------------|------------|---|
| IRAK4      | 0.0708647  | 1 |
| SARS2      | 0.0214249  | 1 |
| CCNG2      | -0.0659683 | 1 |
| ZNF619     | 0.0308439  | 1 |
| ING5       | 0.0417675  | 1 |
| EFHC1      | -0.0690523 | 1 |
| APEX2      | -0.0164763 | 1 |
| SLC35B2    | -0.0021233 | 1 |
| ARFIP2     | -0.0250703 | 1 |
| INTS1      | -0.0227774 | 1 |
| PAN2       | 0.0059356  | 1 |
| ANKRD50    | 0.0297489  | 1 |
| URB1-AS1   | -0.0432054 | 1 |
| DICER1     | 0.0090492  | 1 |
| FAM117A    | 0.0024664  | 1 |
| NADSYN1    | 0.0278575  | 1 |
| TRIT1      | -0.0067558 | 1 |
| ZFP30      | -0.0004665 | 1 |
| PHF8       | 0.0237994  | 1 |
| ENKD1      | -0.0065536 | 1 |
| KMT5B      | -0.0668199 | 1 |
| NUDC       | 0.0135873  | 1 |
| PPP4R3A    | -0.010619  | 1 |
| ARAP2      | 0.0200158  | 1 |
| AL662844.4 | 0.0052429  | 1 |
| DNASE1     | -0.0658039 | 1 |
| SREK1      | 0.0699263  | 1 |
| NFYC       | 0.0042815  | 1 |
| SUMO2      | -0.0234554 | 1 |
| AC097634.1 | -0.0065596 | 1 |
| MAN2B1     | 0.0046298  | 1 |
| ING3       | -0.0241749 | 1 |
| SRSF8      | 0.0366717  | 1 |
| MAN2A1     | -0.0267645 | 1 |
| ACER3      | 0.0089494  | 1 |
| NUP58      | -0.0107446 | 1 |
| GPN1       | -0.0356441 | 1 |
| ACTA2      | 0.0581938  | 1 |
| SIN3B      | 0.000573   | 1 |
| JOSD2      | 0.0279558  | 1 |
| TNFRSF10B  | -0.0393175 | 1 |
| CNBD2      | -0.0018228 | 1 |
| NELFB      | -0.0238461 | 1 |
| THRAP3     | 0.0206612  | 1 |
| MROH1      | 0.0242442  | 1 |
| AC067852.2 | -0.0071219 | 1 |
| NAPA       | -0.0839767 | 1 |
| GXYLT1     | -0.0044115 | 1 |
| QSOX1      | -0.0330651 | 1 |
| NYNRIN     | 0.0021014  | 1 |

|           |            |   |
|-----------|------------|---|
| SATB1     | 0.1036818  | 1 |
| LINC00630 | 0.0021995  | 1 |
| ZNF189    | -0.0303244 | 1 |
| CCSER2    | 0.0175259  | 1 |
| MIA2      | -0.0013127 | 1 |
| DGCR6     | -0.0384115 | 1 |
| RACGAP1   | 0.0250356  | 1 |
| HYOU1     | -0.0057493 | 1 |
| RFX5      | -0.0265944 | 1 |
| MCRS1     | -0.0090596 | 1 |
| NSMF      | -0.0389998 | 1 |
| DNM1L     | -0.0240127 | 1 |
| DENND1A   | 0.0018178  | 1 |
| ZSWIM8    | -0.0190132 | 1 |
| LSM10     | 0.0606015  | 1 |
| DVL2      | -0.0025207 | 1 |
| TSPO      | -0.0093914 | 1 |
| CPNE1     | -0.014452  | 1 |
| TMEM8A    | -0.0224128 | 1 |
| FBXO5     | 0.0256699  | 1 |
| GALNS     | 0.0287808  | 1 |
| ALDH2     | -0.0573937 | 1 |
| OXCT1     | -0.0440097 | 1 |
| ZKSCAN4   | 0.0128921  | 1 |
| CXCR4     | 0.0052597  | 1 |
| DMAC2     | 0.0270409  | 1 |
| ZNF350    | -0.0424463 | 1 |
| POLL      | -0.0014287 | 1 |
| RBM10     | 0.0375547  | 1 |
| RBMXL1    | 0.0132446  | 1 |
| ZNF275    | -0.0430224 | 1 |
| INO80     | -0.0236887 | 1 |
| MAML2     | -0.0441695 | 1 |
| NET1      | 0.0534288  | 1 |
| PCK2      | -0.0353137 | 1 |
| KIF13B    | 0.001726   | 1 |
| NAA80     | 0.0285687  | 1 |
| FGFBP3    | 0.0087249  | 1 |
| AIF1L     | 0.0527556  | 1 |
| ZNF420    | 0.0269378  | 1 |
| DBNDD2    | 0.0087162  | 1 |
| PPP1R12C  | -0.0362883 | 1 |
| MEGF9     | -0.0558881 | 1 |
| ZRSR2     | -0.0147311 | 1 |
| OXA1L     | 0.0766515  | 1 |
| SMG9      | 0.0090458  | 1 |
| ACSS2     | -0.0148056 | 1 |
| HECTD3    | -0.0218673 | 1 |
| TRIM23    | -0.0054838 | 1 |
| BAP1      | -0.0325576 | 1 |

|            |            |   |
|------------|------------|---|
| ZNF175     | 0.0171572  | 1 |
| DTX2       | 0.0040215  | 1 |
| IFI27L1    | -0.0318174 | 1 |
| STK25      | 0.0038494  | 1 |
| TRMU       | -0.0112375 | 1 |
| NEK8       | -0.0127502 | 1 |
| CDKN2AIPN  | 0.0520547  | 1 |
| CLYBL      | 0.0437087  | 1 |
| NAXD       | -0.0214366 | 1 |
| ZNF623     | 0.0130931  | 1 |
| ANKFY1     | 0.0169341  | 1 |
| PTTG1      | -0.0048562 | 1 |
| PPP1R3F    | -0.0216034 | 1 |
| LRCH1      | -0.0332987 | 1 |
| RNF185     | -0.0201157 | 1 |
| ATG12      | 0.0336477  | 1 |
| VPS37A     | -0.0664795 | 1 |
| MAN2C1     | -0.042688  | 1 |
| MARCH6     | -0.0125113 | 1 |
| ATP5PO     | 0.0139451  | 1 |
| AC132872.1 | -0.0195792 | 1 |
| PYGB       | 0.0121122  | 1 |
| AC026124.2 | -0.0313203 | 1 |
| CPQ        | -0.0433326 | 1 |
| RAB29      | -0.0545767 | 1 |
| UBTD2      | -0.0236293 | 1 |
| RNF139     | -0.0212527 | 1 |
| PRKAR2B    | 0.01788    | 1 |
| AL050309.1 | 0.0268867  | 1 |
| SMG1       | -0.0582353 | 1 |
| KRI1       | 0.0364637  | 1 |
| TRIM65     | 0.0287651  | 1 |
| CLINT1     | -0.0920923 | 1 |
| AAR2       | -0.0119786 | 1 |
| DAPK1-IT1  | -0.0160041 | 1 |
| SLC25A30   | 0.0142328  | 1 |
| ZNF584     | -0.0109998 | 1 |
| TIGAR      | -0.023352  | 1 |
| RPL19      | 0.0328086  | 1 |
| SAMD10     | 0.005932   | 1 |
| DDX58      | 0.0426325  | 1 |
| MFSD9      | 0.0051005  | 1 |
| PTPN23     | 0.0076626  | 1 |
| BROX       | 0.0339432  | 1 |
| SPRYD4     | 0.0402022  | 1 |
| DDRKG1     | 0.008494   | 1 |
| RBM18      | -0.0111905 | 1 |
| TMCC1      | 0.0002229  | 1 |
| MRPL9      | 0.0066223  | 1 |
| SCAF11     | 0.0723077  | 1 |



|            |            |   |
|------------|------------|---|
| FBXL18     | -0.0071576 | 1 |
| ANAPC4     | 0.0138559  | 1 |
| MRPL21     | -0.0404456 | 1 |
| ATP8A1     | 0.0327467  | 1 |
| ARMCX5     | 0.0058811  | 1 |
| FAR2       | 0.0286231  | 1 |
| ZNF549     | -0.0293218 | 1 |
| DIAPH1     | 0.0045887  | 1 |
| AP5B1      | -0.0730449 | 1 |
| CKM        | -0.0045355 | 1 |
| MARCH1     | -0.0250309 | 1 |
| NAPB       | -0.0430146 | 1 |
| STYX       | -0.0107127 | 1 |
| COQ4       | -0.0416252 | 1 |
| FAM189B    | 0.0131586  | 1 |
| ZNF569     | -0.0172143 | 1 |
| PHF5A      | -0.0912845 | 1 |
| OPA3       | -0.0063602 | 1 |
| RARS2      | -0.0394766 | 1 |
| DNAJC30    | -0.0579975 | 1 |
| PNRC1      | 0.0284593  | 1 |
| MOB3C      | -0.0338805 | 1 |
| LRRC37B    | -0.0789502 | 1 |
| FAM98C     | 0.0153291  | 1 |
| ERMAP      | 0.001316   | 1 |
| NIPBL      | -0.0538243 | 1 |
| RAD23B     | 0.0712588  | 1 |
| APOO       | 0.0307174  | 1 |
| AC027682.4 | 0.0061256  | 1 |
| NCAPH2     | -0.0241435 | 1 |
| PJA1       | -0.0123894 | 1 |
| LAMTOR5    | 0.0029742  | 1 |
| MT-ND1     | -0.1357097 | 1 |
| COX6C      | -0.0478844 | 1 |
| ICMT       | 0.0258459  | 1 |
| ZNF668     | 0.0176497  | 1 |
| MYCBP      | 0.0949554  | 1 |
| SLC9A8     | -0.0303562 | 1 |
| KHDC4      | 0.0178244  | 1 |
| AL355075.4 | -0.0006963 | 1 |
| SLC24A1    | 0.0396617  | 1 |
| TSPAN13    | 0.0266009  | 1 |
| ZNF211     | -0.0358605 | 1 |
| RWDD3      | 0.0149274  | 1 |
| APOBEC3D   | 0.0141803  | 1 |
| PAQR3      | 0.0327071  | 1 |
| ERAL1      | 0.0072805  | 1 |
| ZNF595     | 0.0146202  | 1 |
| IFI35      | 0.0244473  | 1 |
| E2F4       | -0.0037317 | 1 |

|            |            |   |
|------------|------------|---|
| WASHC4     | -0.0154325 | 1 |
| CDK8       | 0.0343808  | 1 |
| MEMO1      | -0.0307363 | 1 |
| ENTPD6     | 0.0093488  | 1 |
| RASGEF1A   | -0.0087938 | 1 |
| AGPAT1     | 0.0186245  | 1 |
| UTP15      | 0.0029489  | 1 |
| BBS7       | 0.0373533  | 1 |
| MRPS23     | 0.0776151  | 1 |
| UFSP2      | -0.0679337 | 1 |
| TKT        | 0.0113177  | 1 |
| ZNF827     | -0.0026847 | 1 |
| USP40      | 0.0380883  | 1 |
| AARS       | 0.0105359  | 1 |
| TSEN15     | 0.0132536  | 1 |
| ZNF773     | -0.0085575 | 1 |
| RANBP10    | -0.0131413 | 1 |
| DCAKD      | 0.0118571  | 1 |
| SLC25A13   | -0.0285403 | 1 |
| ZNF470     | 0.0084582  | 1 |
| SNX12      | -0.0037624 | 1 |
| MIEF2      | -0.0320285 | 1 |
| UBOX5      | -0.0422434 | 1 |
| NAA20      | 0.0309189  | 1 |
| NEIL2      | 0.0059582  | 1 |
| MRNIP      | 0.0241339  | 1 |
| ELMOD3     | 0.0396593  | 1 |
| OSTF1      | 0.0372491  | 1 |
| TMEM243    | -0.0476476 | 1 |
| HLA-DMB    | -0.0229374 | 1 |
| AC090152.1 | 0.0341277  | 1 |
| STARD8     | -0.0535618 | 1 |
| FBXO31     | -0.0325723 | 1 |
| GORAB      | -0.0275115 | 1 |
| MOSPD3     | 0.0086046  | 1 |
| NAA30      | -0.0266614 | 1 |
| TIMM29     | -0.0028885 | 1 |
| PLEKHF2    | -0.0729818 | 1 |
| C3orf80    | -0.1278598 | 1 |
| NCAPG2     | 0.0207011  | 1 |
| TRIP12     | 0.0933745  | 1 |
| TNFSF12    | 0.0102009  | 1 |
| RAB2B      | -0.0041466 | 1 |
| AC092329.4 | 0.0040875  | 1 |
| HEATR6     | 0.0256757  | 1 |
| CSF2RA     | 0.039626   | 1 |
| WDR47      | -0.0632824 | 1 |
| FAM120B    | 0.0303275  | 1 |
| OST4       | 0.0093214  | 1 |
| SRP54      | -0.0054866 | 1 |

|            |            |   |
|------------|------------|---|
| THAP3      | -0.0093499 | 1 |
| SLC5A10    | 0.0075491  | 1 |
| TERF2IP    | -0.0373215 | 1 |
| CCSAP      | 0.0244346  | 1 |
| HIST1H3D   | -0.0930645 | 1 |
| CCZ1B      | -0.0126281 | 1 |
| DNAAF4     | -0.0072603 | 1 |
| HACE1      | 0.0245048  | 1 |
| PDP2       | -0.0007408 | 1 |
| ABL1       | -0.0255445 | 1 |
| FAM149B1   | 0.014165   | 1 |
| LINC00921  | 0.0103619  | 1 |
| ARL13B     | -0.0464254 | 1 |
| KLF11      | -0.0189301 | 1 |
| EMC9       | 0.0083804  | 1 |
| TXNL4A     | 0.0566308  | 1 |
| EPG5       | 0.0172149  | 1 |
| AL353622.1 | 0.0063658  | 1 |
| DSC2       | 0.0576019  | 1 |
| FAM122B    | -0.0279977 | 1 |
| PPP1R9B    | 0.0034517  | 1 |
| TCERG1     | 0.0094706  | 1 |
| GPR137     | -0.0240353 | 1 |
| ARPC2      | -0.0926691 | 1 |
| BET1L      | -0.0314574 | 1 |
| ACCS       | 0.0064989  | 1 |
| MRPL41     | 0.0037544  | 1 |
| STX2       | -0.0323754 | 1 |
| NDUFB8     | 0.0376821  | 1 |
| SGSM3      | -0.0403437 | 1 |
| HAUS5      | -0.007776  | 1 |
| ZER1       | 0.0082974  | 1 |
| RBBP8      | 0.0411131  | 1 |
| SNAP47     | 0.0088685  | 1 |
| P3H1       | 0.0423027  | 1 |
| TAOK3      | -0.0429469 | 1 |
| CLSTN3     | -0.0408654 | 1 |
| TTI1       | 0.0282506  | 1 |
| ZNF682     | 0.0023572  | 1 |
| ABHD2      | -0.0069937 | 1 |
| MMP25-AS1  | 0.0265444  | 1 |
| REV1       | -0.0298646 | 1 |
| CIAPIN1    | -0.0149808 | 1 |
| AC127521.1 | 0.0420845  | 1 |
| BABAM2     | 0.0271463  | 1 |
| SLC9A1     | 0.0106633  | 1 |
| AC100810.1 | -0.0424478 | 1 |
| RANGAP1    | 0.0338752  | 1 |
| HM13       | 0.0367115  | 1 |
| SORBS3     | -0.0242053 | 1 |

|            |            |   |
|------------|------------|---|
| TMEM127    | -0.0740392 | 1 |
| RPL27      | 0.0532854  | 1 |
| GTF2E1     | -0.0195014 | 1 |
| PTAR1      | -0.0751215 | 1 |
| POLB       | -0.0163868 | 1 |
| PDK2       | 0.0257775  | 1 |
| LMNB2      | -0.0261417 | 1 |
| MPP5       | 0.0195805  | 1 |
| DMAP1      | -0.0129473 | 1 |
| ZNF709     | -0.0142575 | 1 |
| TNRC6C     | 0.021456   | 1 |
| RAB33B     | -0.0097005 | 1 |
| ARHGAP35   | 0.0394881  | 1 |
| SRGN       | -0.0541526 | 1 |
| CDADC1     | 0.0514106  | 1 |
| MIR3936HG  | 0.0302923  | 1 |
| MT-ND5     | 0.0498753  | 1 |
| POR        | -0.0035154 | 1 |
| SLF1       | 0.0513421  | 1 |
| PES1       | 0.0242716  | 1 |
| AL121603.2 | 0.0021515  | 1 |
| RPTOR      | 0.0148025  | 1 |
| ZNF35      | 0.0011576  | 1 |
| CENPT      | 0.0094649  | 1 |
| GALE       | -0.0308285 | 1 |
| LRRC47     | 0.0450283  | 1 |
| ZWILCH     | 0.0216001  | 1 |
| ARAF       | -0.0612018 | 1 |
| TNKS       | 0.0130846  | 1 |
| DOHH       | -0.01219   | 1 |
| ZMYM5      | -0.0633398 | 1 |
| ZNF736     | 0.0068801  | 1 |
| PCGF1      | -0.0314574 | 1 |
| ZNF778     | 0.0124196  | 1 |
| SRPRA      | 0.0014775  | 1 |
| ARMC7      | -0.068656  | 1 |
| RPL3       | -0.005076  | 1 |
| RHBDF1     | -0.030784  | 1 |
| FAM153CP   | 0.0165697  | 1 |
| KRTCAP2    | 0.0270133  | 1 |
| RALGAPB    | -0.0308933 | 1 |
| RSL24D1    | -0.0872604 | 1 |
| ABHD15     | -0.0629268 | 1 |
| ZEB1-AS1   | -0.0407364 | 1 |
| C22orf39   | -0.0325086 | 1 |
| AC044849.1 | -0.0346572 | 1 |
| TP53RK     | 0.0055257  | 1 |
| HMG20A     | -0.0097165 | 1 |
| MANEA-DT   | 0.0389728  | 1 |
| PSKH1      | -0.0442175 | 1 |

|            |            |   |
|------------|------------|---|
| HCFC1      | 0.0340628  | 1 |
| GZF1       | -0.0088675 | 1 |
| COX7A2L    | 0.014138   | 1 |
| SMIM14     | 0.0190752  | 1 |
| SNX11      | -0.0124893 | 1 |
| FANCG      | 0.012372   | 1 |
| ZNF846     | 0.0073991  | 1 |
| SMIM24     | 0.1047395  | 1 |
| AC008875.3 | -0.0083248 | 1 |
| LRFN4      | 0.020808   | 1 |
| FGGY       | -0.0106222 | 1 |
| SGMS1      | -0.011983  | 1 |
| TIE1       | -0.0029525 | 1 |
| BCR        | -0.0288754 | 1 |
| GATA2-AS1  | -0.0063323 | 1 |
| IFT46      | -0.005898  | 1 |
| ABHD3      | 0.0075231  | 1 |
| KCTD13     | -0.0029227 | 1 |
| MEF2D      | -0.0654326 | 1 |
| ZNF552     | 0.0029285  | 1 |
| NIPSNAP3B  | 0.0361651  | 1 |
| MEST       | 0.0306459  | 1 |
| PICK1      | 0.0011382  | 1 |
| ZNF333     | 0.0091306  | 1 |
| RPL4       | -0.0772812 | 1 |
| SERPINA1   | -0.0396661 | 1 |
| MSH6       | 0.0254559  | 1 |
| PCLAF      | -0.0596323 | 1 |
| YY1        | -0.0359711 | 1 |
| SENP1      | -0.0379233 | 1 |
| COG8       | 0.018342   | 1 |
| HIST1H1B   | 0.0285412  | 1 |
| ICAM4      | -0.0021909 | 1 |
| CSAD       | -0.002736  | 1 |
| DOP1B      | -0.0266878 | 1 |
| SYS1       | -0.028916  | 1 |
| ZMIZ2      | -0.0423152 | 1 |
| AC048341.1 | -0.039764  | 1 |
| HLA-DMA    | -0.052943  | 1 |
| PSMA7      | 0.0419649  | 1 |
| TMTC3      | 0.0048061  | 1 |
| AC083862.3 | -0.0190348 | 1 |
| KNTC1      | 0.0060765  | 1 |
| UNC119B    | -0.0454872 | 1 |
| FOXJ2      | -0.0012403 | 1 |
| HSPA4      | -0.0143712 | 1 |
| RSBN1L     | -0.0389244 | 1 |
| TOE1       | 0.0491228  | 1 |
| CYB5D1     | -0.0150878 | 1 |
| ZNF407     | 0.0058678  | 1 |

|            |            |   |
|------------|------------|---|
| TYMS       | -0.0488988 | 1 |
| PRAM1      | -0.0312463 | 1 |
| LINC00294  | 0.0059534  | 1 |
| SRCAP      | 0.0011568  | 1 |
| BOLA3      | 0.0265269  | 1 |
| R3HCC1L    | -0.0139527 | 1 |
| PIGZ       | 0.0253859  | 1 |
| PIP5K1A    | -0.0545824 | 1 |
| ZNF611     | 0.0014814  | 1 |
| COASY      | 0.0383101  | 1 |
| AP1M1      | -0.0289476 | 1 |
| TBC1D22A   | 0.024006   | 1 |
| FKBP2      | 0.0038568  | 1 |
| PINK1      | 0.0290347  | 1 |
| RPL10A     | -0.0606139 | 1 |
| USB1       | 0.0082202  | 1 |
| AC083799.1 | -0.030042  | 1 |
| BBS4       | 0.0303433  | 1 |
| SYNCRIP    | 0.0446788  | 1 |
| AC092338.3 | 0.0129264  | 1 |
| DXO        | -0.0266521 | 1 |
| MYO19      | 0.0330931  | 1 |
| ABHD18     | 0.0071648  | 1 |
| TNNT3      | -0.059948  | 1 |
| TRAF3IP2-A | 0.0057965  | 1 |
| RPAP3      | 0.064092   | 1 |
| ZNF586     | -0.0016128 | 1 |
| NEK3       | 0.0321038  | 1 |
| WDR81      | -0.0291125 | 1 |
| THOP1      | -0.0099998 | 1 |
| SH3GLB2    | -0.040761  | 1 |
| EIF2D      | -0.0299263 | 1 |
| SMPD1      | -0.0275518 | 1 |
| LIG1       | 0.0355991  | 1 |
| MMP28      | -0.0176165 | 1 |
| RIPK1      | -0.0085212 | 1 |
| RAP2C-AS1  | -0.0187556 | 1 |
| ERI1       | 0.0084687  | 1 |
| APH1B      | -0.0233903 | 1 |
| ZNF467     | -0.0032633 | 1 |
| ACTR5      | 0.0120771  | 1 |
| TUBA1B     | -0.2221774 | 1 |
| ZCCHC3     | -0.0104462 | 1 |
| PPM1D      | 0.0120356  | 1 |
| RBM7       | -0.0558272 | 1 |
| UPK3BL1    | -0.0379014 | 1 |
| KIAA0355   | -0.0245512 | 1 |
| HDGF       | 0.0014986  | 1 |
| NLE1       | 0.0112167  | 1 |
| CCNB1      | 0.0496308  | 1 |

|            |            |   |
|------------|------------|---|
| RPL29      | -0.065687  | 1 |
| TPK1       | -0.0587419 | 1 |
| SMARCA4    | 0.0609079  | 1 |
| RPL6       | -0.0102207 | 1 |
| VCL        | 0.0316914  | 1 |
| HOXA10-AS  | 0.021132   | 1 |
| CRNKL1     | -0.0275999 | 1 |
| INO80C     | 0.0278607  | 1 |
| RAD51B     | 0.0186413  | 1 |
| UCK1       | -0.0187413 | 1 |
| AC114980.1 | -0.0303737 | 1 |
| JMJD8      | -0.0158977 | 1 |
| PITPNM1    | 0.0132928  | 1 |
| GCC1       | 0.005253   | 1 |
| SIRT6      | -0.0036538 | 1 |
| RCL1       | 0.0110208  | 1 |
| SPCS1      | -0.1035528 | 1 |
| SMAD1      | -0.0124228 | 1 |
| AC025159.1 | -0.0272749 | 1 |
| ZBTB18     | -0.0370409 | 1 |
| PTGS2      | -0.0241764 | 1 |
| PIDD1      | -0.0238828 | 1 |
| C1QTNF4    | 0.031666   | 1 |
| CEACAM4    | -0.0209418 | 1 |
| AC104532.2 | 0.0251416  | 1 |
| ZKSCAN5    | 0.0008421  | 1 |
| LDLRAD2    | -0.0376581 | 1 |
| ZNF133     | 0.0123643  | 1 |
| HIGD1A     | -0.0697533 | 1 |
| TRMO       | -0.031036  | 1 |
| ZNF527     | 0.0174192  | 1 |
| CALM2      | -0.0097948 | 1 |
| SFMBT2     | -0.0034292 | 1 |
| RBM5       | -0.0776356 | 1 |
| PRMT9      | -0.013216  | 1 |
| ZFHX2-AS1  | -0.0027893 | 1 |
| AMT        | 0.0114627  | 1 |
| CEACAM21   | -0.0187154 | 1 |
| PFDN4      | -0.0242668 | 1 |
| FYN        | 0.0260695  | 1 |
| ZNF792     | -0.0234108 | 1 |
| SUPT7L     | -0.0483162 | 1 |
| FXYD5      | 0.0163519  | 1 |
| USP38      | -0.0306372 | 1 |
| LINC00173  | 0.0036524  | 1 |
| NTN1       | 0.0192141  | 1 |
| OAS3       | -0.009611  | 1 |
| ITGAL      | 0.071861   | 1 |
| CUL4A      | -0.0187055 | 1 |
| SZT2       | 0.0097368  | 1 |

|            |            |   |
|------------|------------|---|
| LYSMD3     | -0.028768  | 1 |
| JAK3       | -0.0026401 | 1 |
| RABGGTB    | 0.0539725  | 1 |
| IER5L      | -0.0386387 | 1 |
| ENPP4      | 0.012392   | 1 |
| SNX13      | 0.0047528  | 1 |
| HEIH       | -0.0213938 | 1 |
| WDR25      | 0.0083787  | 1 |
| SYPL1      | 0.0115875  | 1 |
| ZNF324     | -0.0102205 | 1 |
| DOCK1      | 0.0931043  | 1 |
| TOM1L1     | 0.0130314  | 1 |
| HMGA1P4    | -0.0217316 | 1 |
| FIS1       | 0.0431508  | 1 |
| IQCG       | -0.0183083 | 1 |
| MARF1      | -0.0218408 | 1 |
| PUS10      | 0.0122455  | 1 |
| TMEM44     | 0.0220693  | 1 |
| SLC25A51   | -0.0091614 | 1 |
| ALMS1      | 0.0228756  | 1 |
| ITGA2B     | -0.012045  | 1 |
| SHF        | -0.0472776 | 1 |
| OGFRL1     | 0.0356983  | 1 |
| SYNGR1     | 0.0365373  | 1 |
| TXNRD2     | 0.0098749  | 1 |
| IGHMBP2    | -0.0694562 | 1 |
| CCRL2      | 0.0047315  | 1 |
| ARMCX1     | -0.0178482 | 1 |
| NDUFV2-AS  | -0.0256821 | 1 |
| ZZEF1      | -0.031437  | 1 |
| CLASRP     | -0.0019682 | 1 |
| ATXN7L3    | -0.0213247 | 1 |
| GOLT1B     | -0.0762439 | 1 |
| PRPF3      | 0.014227   | 1 |
| MON2       | -0.0386582 | 1 |
| CYFIP2     | -0.0192868 | 1 |
| GTF2IRD2B  | 0.0161334  | 1 |
| PTMS       | 0.0020422  | 1 |
| AQP3       | 0.0239113  | 1 |
| FAM185A    | 0.0027052  | 1 |
| ADAM28     | 0.0107172  | 1 |
| RIC1       | -0.0356263 | 1 |
| ZNF776     | 0.0054617  | 1 |
| KBTBD4     | -0.0200675 | 1 |
| AKAP8      | -0.0164353 | 1 |
| STAM2      | -0.0302562 | 1 |
| SNHG11     | 0.0112498  | 1 |
| ZBTB11-AS1 | -0.0116437 | 1 |
| RMI2       | -0.0117001 | 1 |
| AL512625.3 | -0.0228508 | 1 |



|            |            |   |
|------------|------------|---|
| HIST1H2AG  | 0.0035606  | 1 |
| JAG1       | -0.0260688 | 1 |
| ZNF600     | -0.0425233 | 1 |
| REX1BD     | 0.0813914  | 1 |
| AC007336.1 | -0.0606087 | 1 |
| GEN1       | 0.0085568  | 1 |
| DNAJB1     | -0.0235501 | 1 |
| NDUFB11    | 0.0220843  | 1 |
| NKG7       | 0.0115724  | 1 |
| GATA2      | 0.0230674  | 1 |
| HIRA       | 0.0270939  | 1 |
| SMG5       | -0.0185416 | 1 |
| EPB41      | 0.0518907  | 1 |
| ZNF136     | 0.0020614  | 1 |
| VPS39      | -0.02971   | 1 |
| HVCN1      | -0.0383734 | 1 |
| MTA2       | -0.0010553 | 1 |
| ZBTB48     | -0.0133824 | 1 |
| INPP5E     | -0.0428315 | 1 |
| ACP1       | 0.0352296  | 1 |
| AL050341.2 | -0.0190511 | 1 |
| VMAC       | -0.0186943 | 1 |
| TRAFD1     | 0.0043628  | 1 |
| GTF2IRD2   | -0.0220882 | 1 |
| TUBE1      | -0.0389026 | 1 |
| CCDC191    | -0.0061861 | 1 |
| COX20      | -0.000147  | 1 |
| INIP       | 0.0396713  | 1 |
| DCTN1      | 0.0081283  | 1 |
| RHOBTB1    | -0.0099971 | 1 |
| ZDHHC8     | -0.0403989 | 1 |
| RBM19      | 0.0115683  | 1 |
| CS         | 0.0594488  | 1 |
| INVS       | 0.0189006  | 1 |
| ZNF615     | 0.0073909  | 1 |
| OSM        | -0.0312146 | 1 |
| GTPBP2     | -0.0220994 | 1 |
| SP2        | -0.0564521 | 1 |
| C19orf25   | -0.0134583 | 1 |
| MBD1       | -0.0028607 | 1 |
| SSH3       | -0.0021134 | 1 |
| TRGC1      | -0.0080858 | 1 |
| FBF1       | 0.012387   | 1 |
| KLHL5      | -0.0760656 | 1 |
| LTV1       | 0.0262746  | 1 |
| PIGG       | 0.0120118  | 1 |
| CLSPN      | 0.014072   | 1 |
| IFITM3     | 0.0364731  | 1 |
| COQ8B      | -0.01313   | 1 |
| RBM12      | -0.0595335 | 1 |

|            |            |   |
|------------|------------|---|
| ZNF384     | 0.0323261  | 1 |
| CFLAR      | -0.00493   | 1 |
| IL12A      | -0.0384013 | 1 |
| TSC1       | -0.071267  | 1 |
| BASP1      | -0.0412814 | 1 |
| SLC35A4    | 0.0047053  | 1 |
| BBS1       | 0.0031595  | 1 |
| CHEK1      | 0.004519   | 1 |
| GIN52      | 0.0159213  | 1 |
| PSME2      | 0.0714002  | 1 |
| PSPC1      | -0.013847  | 1 |
| BST1       | -0.0088643 | 1 |
| AL139260.1 | 0.0172919  | 1 |
| TAF1A      | -0.0050389 | 1 |
| EMSY       | 0.0023994  | 1 |
| AL591895.1 | -0.0350023 | 1 |
| PROSER2    | -0.0029318 | 1 |
| MRPL28     | -0.0222142 | 1 |
| ERP29      | 0.0166353  | 1 |
| AC012615.1 | -0.0145127 | 1 |
| FAM161B    | -0.0222504 | 1 |
| ASB1       | -0.0602376 | 1 |
| RPL35      | -0.0059055 | 1 |
| ZFYVE28    | 0.0040453  | 1 |
| LMF1       | 0.0221004  | 1 |
| AC074032.1 | 0.0262689  | 1 |
| ATG16L1    | -0.0231169 | 1 |
| LAMP1      | 0.0037015  | 1 |
| KDM4C      | -0.0013922 | 1 |
| FPGS       | -0.0132008 | 1 |
| AC087190.1 | -0.0138285 | 1 |
| TMEM263    | -0.0016426 | 1 |
| FAM53B     | 0.0129157  | 1 |
| TTC7B      | 0.0396764  | 1 |
| NFIX       | 0.0330219  | 1 |
| EIF5B      | 0.0259731  | 1 |
| RPL7A      | -0.0350138 | 1 |
| EXD3       | -0.0269714 | 1 |
| ZDHHC4     | 0.0542243  | 1 |
| BGLAP      | 0.0034839  | 1 |
| MIR1-1HG-A | -0.0105458 | 1 |
| AL096865.1 | 0.0142959  | 1 |
| C9orf78    | 0.0427125  | 1 |
| SRRD       | 0.0155766  | 1 |
| RPS5       | -0.0847496 | 1 |
| ACOT8      | -0.015836  | 1 |
| ZFP1       | -0.0349332 | 1 |
| SIAH2      | -0.0019843 | 1 |
| ASL        | -0.0732118 | 1 |
| C12orf76   | -0.0331871 | 1 |

|             |            |   |
|-------------|------------|---|
| ABCA7       | 0.0090899  | 1 |
| TBC1D7      | -0.0028204 | 1 |
| DENND4C     | -0.0056418 | 1 |
| NCEH1       | 0.0246323  | 1 |
| IL6ST       | -0.0281636 | 1 |
| AEN         | -0.0116531 | 1 |
| CTNNAL1     | -0.0090549 | 1 |
| KRBOX4      | -0.0099928 | 1 |
| BTF3        | 0.0253734  | 1 |
| SLC38A1     | -0.0848515 | 1 |
| MYSM1       | 0.0347009  | 1 |
| C7orf25     | -0.0066822 | 1 |
| LINC01943   | 0.013225   | 1 |
| HCFC1R1     | -0.0229164 | 1 |
| ZBTB5       | -0.0112243 | 1 |
| FGD5-AS1    | -0.0134784 | 1 |
| PTP4A2      | -0.0179023 | 1 |
| DCUN1D2     | -0.0054512 | 1 |
| PROCA1      | 0.0064602  | 1 |
| ZNF154      | -0.0096558 | 1 |
| INTS6L      | -0.0002588 | 1 |
| ARHGAP5     | -0.0212324 | 1 |
| TSC22D1-AS1 | 0.0142209  | 1 |
| ZNF701      | 0.0137569  | 1 |
| EML2        | 0.0314955  | 1 |
| MEX3C       | -0.0581492 | 1 |
| LYST        | 0.0105692  | 1 |
| EIF4A1      | 0.0001276  | 1 |
| MTPAP       | 0.0046344  | 1 |
| TMCO4       | 0.0212909  | 1 |
| HNRNPK      | -0.0196305 | 1 |
| TBC1D22B    | -0.0239453 | 1 |
| TCTE3       | 0.0029316  | 1 |
| TMEM254     | 0.0128858  | 1 |
| AC103591.3  | -0.0779775 | 1 |
| ASTE1       | -0.0338548 | 1 |
| APTX        | -0.0231412 | 1 |
| RABL2B      | -0.0231469 | 1 |
| CAPS        | -0.0122763 | 1 |
| HIST1H2BF   | -0.0152799 | 1 |
| EBLN2       | -0.035646  | 1 |
| ZNF747      | 0.0025835  | 1 |
| FGFRL1      | -0.0569517 | 1 |
| HDAC9       | -0.0172446 | 1 |
| FAM174A     | 0.0124643  | 1 |
| TBC1D32     | 0.0291155  | 1 |
| ITM2B       | -0.0437816 | 1 |
| AC139530.1  | 8.724E-05  | 1 |
| ATP13A1     | 0.0367415  | 1 |
| WDR59       | 0.0273629  | 1 |

|            |            |   |
|------------|------------|---|
| NDUFA4     | 7.691E-05  | 1 |
| MKNK1      | -0.0768068 | 1 |
| LRRC61     | -0.0291097 | 1 |
| C16orf70   | 0.0013677  | 1 |
| ZNF263     | 0.0068574  | 1 |
| PIK3R6     | -0.0009033 | 1 |
| RTL6       | -0.0367877 | 1 |
| MIGA1      | -0.0136219 | 1 |
| RELCH      | -0.0414189 | 1 |
| TMEM237    | 0.0149937  | 1 |
| ZNF134     | -0.0088014 | 1 |
| ZNF7       | -0.0182353 | 1 |
| SLC25A17   | 0.0222095  | 1 |
| PRKRIP1    | -0.0297653 | 1 |
| PIGO       | -0.0031419 | 1 |
| ZNF684     | -0.0251098 | 1 |
| ZNF548     | 0.0109171  | 1 |
| HIST1H2BN  | -0.0264125 | 1 |
| GLIDR      | 0.0277409  | 1 |
| DUSP28     | -0.0131698 | 1 |
| HSP90AA1   | -0.0139616 | 1 |
| DPCD       | -0.023311  | 1 |
| ZNF16      | 0.0251268  | 1 |
| AC104530.1 | -0.0145041 | 1 |
| RAB11B-AS1 | 0.0223208  | 1 |
| DDX5       | -0.0828398 | 1 |
| CASS4      | -0.050509  | 1 |
| MYH11      | -0.0010018 | 1 |
| ZNF200     | -0.0028528 | 1 |
| YME1L1     | -0.0507455 | 1 |
| CASTOR2    | -0.0024529 | 1 |
| FAM204A    | -0.0259091 | 1 |
| AC023157.3 | -0.0179369 | 1 |
| NRF1       | -0.0399857 | 1 |
| WDR53      | 0.0203787  | 1 |
| SLC25A3    | 0.0114996  | 1 |
| RPL23A     | 0.0034994  | 1 |
| CACNA2D4   | 0.0245123  | 1 |
| DNAJA1     | 0.0219227  | 1 |
| TOR1B      | -0.0301135 | 1 |
| AMN1       | -0.0170165 | 1 |
| ZNF528     | -0.0025721 | 1 |
| RHNO1      | 0.006129   | 1 |
| PPT2       | -0.0093554 | 1 |
| RDH13      | -0.0368026 | 1 |
| CTC1       | -0.043713  | 1 |
| ZNF710     | -0.0247911 | 1 |
| MARCH8     | -0.0308886 | 1 |
| AP3M1      | -0.0169174 | 1 |
| CIDEB      | -0.0072848 | 1 |

|            |            |   |
|------------|------------|---|
| AC009107.2 | 0.002991   | 1 |
| ABR        | -0.054382  | 1 |
| MYO1B      | 0.0112774  | 1 |
| RAB37      | -0.0438951 | 1 |
| RBBP7      | 0.0330628  | 1 |
| AL355001.2 | -0.0015328 | 1 |
| BLOC1S3    | -0.015981  | 1 |
| SLC9A3-AS' | 0.0087532  | 1 |
| AP4M1      | -0.0294492 | 1 |
| DNAJC27    | -0.0393691 | 1 |
| AUH        | 0.0150959  | 1 |
| RPL32      | 0.0154698  | 1 |
| FKBP15     | 0.0092781  | 1 |
| EGFL7      | 0.0050136  | 1 |
| NOP53      | -0.0049794 | 1 |
| MGAT2      | 0.0025552  | 1 |
| HACD1      | -0.0090764 | 1 |
| TPP2       | 0.0121802  | 1 |
| LIPE-AS1   | 0.0007413  | 1 |
| ACOT9      | -0.0223561 | 1 |
| BRCA2      | -0.0545472 | 1 |
| ZNF625     | 0.0325099  | 1 |
| RRN3       | -0.0034378 | 1 |
| ATP5MC3    | -0.0263011 | 1 |
| LY6G5B     | -0.0101094 | 1 |
| C2CD3      | 0.0068192  | 1 |
| TENT5C     | 0.0190866  | 1 |
| MTG2       | -0.008155  | 1 |
| RETN       | -0.0179444 | 1 |
| TEPSIN     | -0.0169325 | 1 |
| ZBTB22     | -0.0258598 | 1 |
| APOBEC3F   | 0.0133533  | 1 |
| NCF2       | 0.0049079  | 1 |
| PITPNA     | -0.0526986 | 1 |
| SVIL       | -0.0201341 | 1 |
| CPPED1     | -0.0191696 | 1 |
| XRCC6      | -0.0228077 | 1 |
| ZNF570     | -0.0187761 | 1 |
| CKB        | -0.0329647 | 1 |
| HLA-DRB1   | 0.0242487  | 1 |
| C2orf92    | -0.0163823 | 1 |
| CD38       | -0.0554264 | 1 |
| EXOC3-AS1  | -0.0049029 | 1 |
| SH3PXD2A   | 0.0348275  | 1 |
| AL451165.2 | -0.0133692 | 1 |
| COA6-AS1   | -0.0233127 | 1 |
| RAB34      | -0.0261253 | 1 |
| ZNF689     | 0.0134457  | 1 |
| ATG9A      | -0.019768  | 1 |
| GDPD1      | -0.035996  | 1 |

|            |            |   |
|------------|------------|---|
| ZFYVE27    | -0.0218538 | 1 |
| ZNF777     | -0.008157  | 1 |
| SRXN1      | -0.0200053 | 1 |
| AP4S1      | -0.0233617 | 1 |
| FAM161A    | -0.0053526 | 1 |
| TMEM217    | -0.0154325 | 1 |
| SYTL4      | -0.0054823 | 1 |
| RPS3       | -0.0011641 | 1 |
| PIM1       | -0.0337384 | 1 |
| IRF7       | -0.0398186 | 1 |
| TMEM106C   | 0.0197543  | 1 |
| FAM118B    | -0.0084889 | 1 |
| HEXIM1     | -0.0222382 | 1 |
| CLDN15     | 0.0196072  | 1 |
| ACSF2      | -0.0077622 | 1 |
| YPEL1      | 0.0304958  | 1 |
| KIF3A      | 0.0103879  | 1 |
| SMIM13     | 0.0019633  | 1 |
| KIAA0753   | -0.0122426 | 1 |
| TMEM199    | -0.0057841 | 1 |
| RAPGEF2    | -0.0085461 | 1 |
| ZFYVE26    | 0.0250893  | 1 |
| SAP25      | 0.00505    | 1 |
| RNASEK     | -0.0291694 | 1 |
| NOL7       | 0.017464   | 1 |
| AP5S1      | -0.0190549 | 1 |
| AKT1S1     | -0.02929   | 1 |
| MALAT1     | -0.1744569 | 1 |
| HSD17B7    | -0.0316543 | 1 |
| MT-ND4     | -0.0212177 | 1 |
| AC016773.1 | 0.002698   | 1 |
| LRRC45     | 0.0259696  | 1 |
| RPS4X      | -0.009949  | 1 |
| JAML       | 0.0479415  | 1 |
| EEF1G      | -0.0169826 | 1 |
| MIF        | 0.0032917  | 1 |
| HLA-F      | -0.0349061 | 1 |

· cells after niche-like culture versus pre-culture (reference). Only genes expressed in :











































































































































































































































































































































































































































































>10% of single cells are reported. Log2 Fold Change (FC) and FDR-adjusted p-value.

**Supplementary Table 12. Differential gene expression averaged across 500 progenitor**

| <b>Gene</b> | <b>log2FC</b> | <b>FDR q-value</b> |
|-------------|---------------|--------------------|
| RPS10       | -1.302091     | 0                  |
| LTC4S       | -1.2596337    | 6.15E-147          |
| MTRNR2L12   | -1.0286435    | 1.69E-142          |
| SKIL        | -0.7897849    | 1.37E-121          |
| FOS         | 2.3310221     | 3.20E-108          |
| MMP2        | -0.8935289    | 8.46E-104          |
| RPL38       | -0.4763086    | 2.23E-100          |
| CYTL1       | -1.4671716    | 4.44E-94           |
| ANPEP       | -0.8510645    | 9.52E-92           |
| CTSD        | -0.8262585    | 3.23E-91           |
| MT-CO3      | 0.5084068     | 1.53E-86           |
| APOC2       | -1.1104556    | 3.03E-85           |
| SMAD7       | -0.4491532    | 7.12E-79           |
| TPSAB1      | -1.8184889    | 2.48E-78           |
| CNR2        | -0.3453214    | 1.14E-72           |
| IFITM2      | 0.7218679     | 5.29E-72           |
| MT-ND4L     | -0.7006551    | 8.93E-71           |
| CD38        | -0.6323199    | 9.59E-71           |
| FOSB        | 1.3592234     | 1.53E-70           |
| RPL31       | -0.4051034    | 1.66E-69           |
| IFITM10     | -0.3474545    | 4.23E-69           |
| MT-ATP8     | -0.7056511    | 5.97E-69           |
| MCL1        | 0.8803093     | 8.74E-67           |
| CD52        | 1.052483      | 9.16E-67           |
| AIF1        | 0.6842086     | 9.99E-66           |
| RPL15       | 0.3263446     | 1.25E-65           |
| IER2        | 0.9973649     | 4.61E-65           |
| JUND        | 0.7140664     | 3.50E-63           |
| CD99        | 0.8336662     | 5.86E-59           |
| EIF1        | 0.4500772     | 6.93E-58           |
| CD69        | 0.9147348     | 7.83E-58           |
| SPINK2      | 0.927367      | 2.60E-56           |
| RPS29       | -0.3163295    | 3.03E-55           |
| HOPX        | 0.7884328     | 2.79E-53           |
| PIM1        | 0.7022934     | 1.62E-52           |
| LY6E        | 0.6331989     | 2.15E-52           |
| DUSP1       | 0.8848142     | 9.20E-51           |
| XBP1        | 0.6969639     | 1.84E-50           |
| MZB1        | 0.9098959     | 2.91E-50           |
| TNFSF14     | -0.3036764    | 1.27E-49           |
| EGR1        | 0.9007287     | 3.58E-49           |
| EGFL7       | 0.7167445     | 4.55E-49           |
| JUNB        | 0.7837937     | 4.96E-49           |
| MRC2        | -0.3895307    | 5.77E-49           |
| TMSB4X      | -0.6526172    | 2.11E-48           |
| ANKRD28     | 0.6787728     | 3.86E-48           |
| RUNX3       | -0.5716959    | 6.09E-48           |

|          |            |          |
|----------|------------|----------|
| SKI      | -0.4276833 | 2.97E-47 |
| HTRA3    | -0.4036809 | 1.82E-45 |
| CD96     | -0.5355033 | 1.85E-45 |
| GATD3A   | -0.3562996 | 1.39E-44 |
| NOTCH1   | -0.365864  | 1.77E-44 |
| WASHC1   | -0.400955  | 4.76E-44 |
| CST7     | 0.6276572  | 1.22E-43 |
| RPS27    | -0.2496889 | 1.71E-43 |
| HCST     | 0.8012914  | 2.73E-43 |
| RPS9     | 0.3049122  | 1.14E-42 |
| RASGRP3  | -0.5469849 | 1.32E-42 |
| RPL37    | -0.2762695 | 4.16E-42 |
| JUN      | 1.1661832  | 4.93E-41 |
| CTNND1   | -0.3931089 | 5.25E-40 |
| SVIL     | 0.5798918  | 7.83E-40 |
| CYP1B1   | -0.4011932 | 4.51E-39 |
| SLC44A1  | -0.6014042 | 9.58E-39 |
| RALGAPA2 | -0.3889502 | 9.85E-39 |
| RPS20    | -0.3273754 | 3.06E-38 |
| DMTN     | -0.1806791 | 4.73E-38 |
| UQCR10   | -0.4428398 | 7.55E-38 |
| MT-ATP6  | 0.3161488  | 1.17E-37 |
| STK17A   | -0.3577566 | 2.15E-37 |
| IRF2BP2  | -0.4964152 | 4.83E-37 |
| MPG      | 0.5191985  | 1.21E-36 |
| CEBPA    | -0.5603371 | 6.24E-36 |
| PCBP2    | -0.3805092 | 9.31E-36 |
| PWWP3A   | -0.3338207 | 1.29E-35 |
| PLCG2    | -0.6615587 | 2.01E-35 |
| RPL39    | -0.2771049 | 2.41E-35 |
| DUSP6    | 0.8580076  | 2.91E-35 |
| GMFG     | 0.4015139  | 6.02E-34 |
| VNN1     | 0.4168944  | 8.98E-34 |
| SNHG6    | -0.3663112 | 1.25E-33 |
| LPCAT2   | -0.5650176 | 2.69E-33 |
| KLF6     | 0.850318   | 2.99E-33 |
| LAPTM5   | -0.4923003 | 3.10E-33 |
| FUCA1    | -0.3094557 | 8.43E-33 |
| FAM30A   | 0.8384089  | 1.16E-32 |
| ST3GAL6  | -0.3257263 | 1.92E-32 |
| UNC5B    | -0.2255954 | 3.59E-32 |
| JAML     | 0.380947   | 3.86E-32 |
| LACC1    | -0.3479855 | 1.01E-31 |
| MYL12B   | -0.3346058 | 1.39E-31 |
| NUDT1    | 0.3700079  | 2.05E-31 |
| CAPG     | -0.5451379 | 3.36E-31 |
| ZFP36    | 0.5333229  | 4.88E-31 |
| S100A11  | -0.5090226 | 5.34E-31 |
| NDUFV2   | 0.4058537  | 7.67E-31 |
| RPL34    | -0.2471415 | 1.78E-30 |

|            |            |          |
|------------|------------|----------|
| S100A9     | 0.2769292  | 2.56E-30 |
| FAM43A     | -0.2868003 | 8.34E-30 |
| AHNAK      | 0.5298441  | 1.22E-29 |
| AC020916.1 | 0.625496   | 1.98E-29 |
| ITGA5      | -0.3297787 | 2.45E-29 |
| ORAI1      | 0.3661231  | 4.70E-29 |
| CTR9       | -0.4696261 | 1.22E-28 |
| RPL3       | 0.2796377  | 1.28E-28 |
| SOX4       | -0.5910137 | 1.47E-28 |
| NKG7       | 0.4554928  | 1.01E-27 |
| ACP5       | -0.2057354 | 1.41E-27 |
| QSOX1      | -0.2757676 | 1.49E-27 |
| ANXA1      | 0.359836   | 1.53E-27 |
| MAP1A      | 0.5266521  | 1.67E-27 |
| LRRC75A    | -0.7482679 | 2.02E-27 |
| ORAI2      | -0.3872229 | 2.02E-27 |
| FTL        | -0.4199557 | 4.20E-27 |
| WASIR1     | -0.1376473 | 1.58E-26 |
| PLEC       | -0.1750994 | 1.96E-26 |
| RNASE3     | -0.3405919 | 2.01E-26 |
| RPL13      | 0.2487174  | 2.14E-26 |
| RGS16      | -0.196459  | 2.91E-26 |
| NARF       | -0.2822456 | 3.13E-26 |
| TSTD1      | 0.3820451  | 3.78E-26 |
| NEAT1      | 0.5366506  | 4.58E-26 |
| PLXDC2     | -0.4415582 | 5.00E-26 |
| TUBA1A     | 0.7520331  | 5.28E-26 |
| MEF2C      | 0.606914   | 5.31E-26 |
| ADGRG1     | 0.3567618  | 6.11E-26 |
| EMB        | 0.5103903  | 7.86E-26 |
| LDLRAD4    | -0.3563008 | 1.40E-25 |
| ARL2       | 0.2455662  | 1.48E-25 |
| SLC16A3    | -0.3663122 | 1.71E-25 |
| CDH26      | -0.2232781 | 2.07E-25 |
| CCNL1      | 0.4629778  | 2.18E-25 |
| MAPKAPK3   | 0.3273738  | 2.76E-25 |
| MGST1      | -0.5530965 | 2.94E-25 |
| FRY        | -0.3619164 | 4.34E-25 |
| ZMIZ1      | -0.3846843 | 6.49E-25 |
| IGLL1      | 0.814896   | 1.40E-24 |
| RPL19      | 0.2247011  | 2.86E-24 |
| RPL35A     | -0.2091658 | 3.08E-24 |
| NDRG1      | -0.3574194 | 5.25E-24 |
| RPL8       | 0.2304696  | 6.06E-24 |
| SQSTM1     | -0.3852285 | 6.71E-24 |
| NCOA4      | -0.4243465 | 7.52E-24 |
| DENND11    | -0.314829  | 8.33E-24 |
| IFITM3     | 0.4564989  | 9.94E-24 |
| ATP2B1-AS' | 0.3683668  | 1.34E-23 |
| TPM4       | 0.5234649  | 1.42E-23 |

|            |            |          |
|------------|------------|----------|
| TIPARP     | -0.3928882 | 1.47E-23 |
| IFI30      | -0.4525803 | 1.52E-23 |
| CTNNB1     | -0.3042088 | 1.55E-23 |
| JCHAIN     | 1.5353699  | 1.83E-23 |
| MARCH3     | -0.1187736 | 1.86E-23 |
| AC104530.1 | -0.1951295 | 2.50E-23 |
| MTRNR2L8   | -0.3461589 | 2.52E-23 |
| MT-ND2     | -0.3499185 | 3.77E-23 |
| TUBB       | 0.4469286  | 4.63E-23 |
| TXNIP      | 0.4803252  | 5.44E-23 |
| TMEM173    | 0.3606606  | 5.46E-23 |
| FRG1       | -0.2995851 | 6.54E-23 |
| KCNQ1OT1   | -0.762586  | 4.85E-22 |
| CDKN1C     | -0.4937993 | 5.93E-22 |
| CD82       | -0.365545  | 7.10E-22 |
| COBLL1     | 0.3824197  | 7.41E-22 |
| SERPING1   | 0.2793951  | 1.27E-21 |
| PLPPR3     | -0.3876968 | 1.64E-21 |
| ST8SIA6    | -0.3593483 | 1.95E-21 |
| STAG3      | -0.1106931 | 2.22E-21 |
| PPBP       | 0.6845586  | 2.36E-21 |
| TSPO       | 0.3553046  | 2.94E-21 |
| GLIPR1     | 0.6467331  | 3.05E-21 |
| LSM7       | 0.3468464  | 3.53E-21 |
| RPS15      | 0.2107642  | 3.82E-21 |
| ACSM3      | -0.6341883 | 3.97E-21 |
| PABPC1     | -0.3192366 | 4.06E-21 |
| HNRNPH1    | -0.3114405 | 5.56E-21 |
| CALM1      | 0.4319423  | 6.45E-21 |
| C3         | -0.1042021 | 1.12E-20 |
| RPL7A      | 0.193787   | 1.28E-20 |
| CTSC       | 0.3567913  | 1.28E-20 |
| ALDOA      | -0.2735631 | 1.39E-20 |
| RPL18A     | 0.2687117  | 1.46E-20 |
| GOLGA8O    | -0.150071  | 1.71E-20 |
| GPR183     | -0.280597  | 1.89E-20 |
| SRGN       | -0.7510084 | 2.11E-20 |
| TNRC18     | -0.3792412 | 2.26E-20 |
| HLA-DPA1   | 0.4695747  | 2.27E-20 |
| SQOR       | -0.305633  | 2.92E-20 |
| LCP1       | 0.4068664  | 3.07E-20 |
| SPI1       | -0.3483064 | 3.30E-20 |
| FKBP2      | -0.1541704 | 4.30E-20 |
| DERL3      | -0.120217  | 5.17E-20 |
| FLT3       | 0.5003979  | 5.32E-20 |
| TRG-AS1    | 0.5518501  | 7.68E-20 |
| STAT1      | -0.2127535 | 8.98E-20 |
| AL627171.2 | -0.3252219 | 9.82E-20 |
| CDC42SE1   | -0.2168871 | 1.12E-19 |
| NCF2       | 0.2792875  | 1.19E-19 |

|            |            |           |
|------------|------------|-----------|
| EVA1B      | 0.2884591  | 1.49E-19  |
| LRPAP1     | -0.4009159 | 1.54E-19  |
| DNAJB6     | -0.326222  | 1.60E-19  |
| TIMP1      | 0.4599651  | 1.69E-19  |
| MANF       | 0.3418061  | 2.28E-19  |
| HMOX1      | -0.1599619 | 2.57E-19  |
| C1orf56    | -0.2274538 | 3.12E-19  |
| RPL41      | -0.187038  | 5.24E-19  |
| MAFG       | -0.2339252 | 5.76E-19  |
| GMCL1      | -0.2869089 | 6.95E-19  |
| INSIG1     | -0.2475116 | 7.43E-19  |
| PCNA       | 0.1110529  | 8.44E-19  |
| TCF4       | 0.6238082  | 9.45E-19  |
| AC244502.1 | -0.5634916 | 9.94E-19  |
| RPL29      | 0.2174122  | 1.20E-18  |
| CD79B      | 0.228503   | 1.64E-18  |
| ETV6       | -0.2911886 | 1.97E-18  |
| LINC00926  | -0.1683429 | 3.76E-18  |
| SNHG25     | -0.2858995 | 3.85E-18  |
| PLEKHO1    | -0.3410686 | 4.07E-18  |
| TUBB4B     | 0.337545   | 4.18E-18  |
| NINJ1      | -0.1365159 | 4.48E-18  |
| VSIR       | 0.3501091  | 4.80E-18  |
| PRDX4      | 0.2822175  | 5.22E-18  |
| AC007952.4 | 0.4656429  | 7.48E-18  |
| NPIP5      | -0.2007855 | 7.59E-18  |
| PRSS21     | 0.2263506  | 7.97E-18  |
| DUSP2      | 0.35104    | 8.00E-18  |
| ENG        | -0.1731154 | 8.85E-18  |
| LAMP1      | -0.2403496 | 9.13E-18  |
| ITGAE      | -0.2940815 | 1.80E-17  |
| TGIF1      | -0.1789215 | 2.64E-17  |
| IER3       | -0.2336853 | 3.13E-17  |
| CFLAR      | -0.3439727 | 4.11E-17  |
| PTBP3      | 0.278529   | 4.22E-17  |
| NEK6       | -0.2277866 | 4.70E-17  |
| RPS8       | 0.1931794  | 5.04E-17  |
| VASH1      | -0.1381793 | 5.89E-17  |
| BIRC2      | -0.1904758 | 8.83E-17  |
| LAMP2      | -0.3163452 | 9.54E-17  |
| NCF1       | -0.2273707 | 1.126E-16 |
| CELF2      | -0.4024448 | 1.134E-16 |
| HOXA3      | -0.2034465 | 1.295E-16 |
| MYCN       | -0.3358157 | 1.342E-16 |
| NCBP3      | -0.3376753 | 1.352E-16 |
| COX6B1     | -0.2967554 | 1.498E-16 |
| PPP3CA     | -0.2865251 | 1.624E-16 |
| ARHGAP25   | 0.333781   | 1.651E-16 |
| ERV3-1     | -0.1966802 | 1.844E-16 |
| LMNB1      | -0.1848446 | 2.081E-16 |



|          |            |           |
|----------|------------|-----------|
| SLC35E2A | -0.1607763 | 2.529E-16 |
| CD36     | 0.5536571  | 2.664E-16 |
| TPM3     | 0.3484828  | 2.995E-16 |
| DOCK10   | -0.2178194 | 3.582E-16 |
| TNFRSF14 | -0.1843571 | 3.867E-16 |
| CBWD1    | -0.1507259 | 4.412E-16 |
| ZMAT5    | -0.1765298 | 4.985E-16 |
| RNASET2  | 0.2606837  | 5.833E-16 |
| NPIPB4   | -0.1441875 | 5.996E-16 |
| EIF4EBP1 | 0.1890435  | 6.471E-16 |
| CCZ1     | -0.1580595 | 6.799E-16 |
| CD300LF  | -0.1646798 | 6.95E-16  |
| PIGX     | -0.1847703 | 7.853E-16 |
| PPP1R14B | 0.2968265  | 1.001E-15 |
| SOCS3    | 0.2675555  | 1.045E-15 |
| DDX3X    | 0.3791458  | 1.045E-15 |
| MYH9     | -0.3393477 | 1.379E-15 |
| IFNGR2   | -0.1882681 | 1.398E-15 |
| AHRR     | -0.076537  | 1.61E-15  |
| RALGDS   | -0.2345257 | 1.786E-15 |
| NECAP2   | 0.1648629  | 1.999E-15 |
| BTG2     | 0.4393784  | 2.225E-15 |
| S100A4   | 0.4231044  | 2.473E-15 |
| ASCL2    | -0.1490001 | 2.889E-15 |
| CD200    | 0.2332625  | 3.041E-15 |
| FMNL3    | -0.1064774 | 3.116E-15 |
| FAM47E   | 0.1329739  | 3.205E-15 |
| MRPL17   | 0.1132658  | 3.62E-15  |
| SOCS2    | 0.250118   | 4.333E-15 |
| FAM89B   | -0.1463642 | 4.665E-15 |
| EFHD2    | 0.1642815  | 4.916E-15 |
| SLC1A4   | -0.1331464 | 5.376E-15 |
| GOLGA8N  | -0.1908993 | 6.117E-15 |
| XIRP2    | 0.1868162  | 7.082E-15 |
| IL2RA    | 0.2809442  | 7.254E-15 |
| GSN      | 0.2639728  | 7.866E-15 |
| PTPMT1   | -0.1802183 | 8.187E-15 |
| JMJD6    | -0.0654044 | 8.511E-15 |
| MXRA7    | -0.1067897 | 8.858E-15 |
| LMO4     | -0.332806  | 9.029E-15 |
| SORL1    | -0.4540184 | 9.093E-15 |
| S100Z    | 0.3384833  | 1.099E-14 |
| CDK2AP2  | -0.0049336 | 1.101E-14 |
| ENDOG    | 0.1348041  | 1.321E-14 |
| SDK2     | -0.0803753 | 1.468E-14 |
| MRPL22   | 0.0098284  | 1.638E-14 |
| HSPG2    | -0.1261944 | 1.666E-14 |
| FIS1     | 0.1886105  | 1.831E-14 |
| GNA12    | -0.2533327 | 1.841E-14 |
| PFDN1    | -0.1923755 | 1.912E-14 |

|            |            |           |
|------------|------------|-----------|
| MCM7       | 0.0709788  | 2.193E-14 |
| CHMP6      | -0.1187378 | 2.213E-14 |
| ZC3HAV1L   | -0.012683  | 2.258E-14 |
| SELPLG     | 0.1688187  | 2.27E-14  |
| TSC22D4    | 0.0897853  | 2.278E-14 |
| GOLGA8M    | -0.081519  | 2.361E-14 |
| RASSF5     | -0.0939258 | 2.388E-14 |
| CFD        | -0.8444304 | 2.402E-14 |
| RYBP       | -0.2200897 | 2.474E-14 |
| CNST       | 0.3054826  | 2.539E-14 |
| AC068587.4 | -0.1781234 | 2.627E-14 |
| AC092069.1 | -0.1515522 | 2.647E-14 |
| SPON2      | -0.1994588 | 2.657E-14 |
| LST1       | 0.3999005  | 2.673E-14 |
| GUCY1A1    | 0.3879527  | 3.602E-14 |
| SASH3      | -0.1343263 | 4.182E-14 |
| AL355922.1 | -0.4326243 | 4.207E-14 |
| PPT1       | -0.2152445 | 4.279E-14 |
| MDK        | 0.3287352  | 4.298E-14 |
| C1orf162   | -0.2974923 | 4.347E-14 |
| NTHL1      | 0.1624278  | 4.803E-14 |
| CCND3      | 0.2796548  | 5.044E-14 |
| H3F3A      | 0.2202523  | 5.444E-14 |
| NRG4       | -0.2326394 | 5.676E-14 |
| RAB37      | -0.247318  | 6.442E-14 |
| PSIP1      | 0.2643474  | 6.556E-14 |
| HCFC1R1    | 0.0465027  | 7.087E-14 |
| H2AFV      | -0.30004   | 8.477E-14 |
| OSER1      | -0.0950699 | 1.131E-13 |
| EPDR1      | 0.1294751  | 1.333E-13 |
| AC012615.1 | -0.0796596 | 1.391E-13 |
| PCBD1      | 0.2047361  | 1.433E-13 |
| SV2A       | 0.1848974  | 1.46E-13  |
| ISG15      | 0.2380961  | 1.479E-13 |
| CD59       | 0.248164   | 1.488E-13 |
| RRP1       | 0.0591881  | 1.636E-13 |
| BCL2       | -0.2517809 | 1.676E-13 |
| GPR108     | -0.087001  | 1.81E-13  |
| BIN1       | 0.2657033  | 1.827E-13 |
| MIR155HG   | 0.2603105  | 1.955E-13 |
| ZNF69      | -0.100148  | 2.036E-13 |
| SAMD11     | -0.0729203 | 2.318E-13 |
| CHID1      | 0.1221488  | 2.506E-13 |
| AC005670.3 | -0.1406029 | 2.866E-13 |
| TRABD      | -0.1631998 | 2.921E-13 |
| RPS21      | -0.1549585 | 3.203E-13 |
| COPRS      | 0.0039069  | 3.362E-13 |
| PSMC5      | 0.1644002  | 3.383E-13 |
| MIA2       | -0.1389774 | 3.477E-13 |
| ADAM28     | -0.3225906 | 4.146E-13 |

|           |            |           |
|-----------|------------|-----------|
| BAHCC1    | -0.2569026 | 4.516E-13 |
| RPS5      | 0.1887831  | 4.574E-13 |
| TMEM248   | -0.059234  | 4.616E-13 |
| GTF2A2    | 0.2179358  | 4.686E-13 |
| FGR       | -0.0671712 | 4.96E-13  |
| NUTM2A-AS | -0.1811339 | 5.06E-13  |
| TBC1D15   | 0.1902018  | 5.11E-13  |
| NFYC      | -0.0591318 | 5.275E-13 |
| GPN1      | -0.0013726 | 5.76E-13  |
| KLF2      | 0.1852822  | 5.965E-13 |
| KLHL24    | -0.2288586 | 6.995E-13 |
| WASHC4    | -0.2112103 | 7.149E-13 |
| GPR132    | -0.0751555 | 8.801E-13 |
| ANGPT1    | 0.4226399  | 9.613E-13 |
| RGS10     | -0.341642  | 1.021E-12 |
| RPL27     | -0.1314025 | 1.033E-12 |
| CCDC85B   | 0.2597449  | 1.255E-12 |
| FNIP1     | -0.2559964 | 1.314E-12 |
| S1PR4     | 0.2071479  | 1.525E-12 |
| SH3GLB1   | -0.2547152 | 1.533E-12 |
| SNRPC     | 0.0357429  | 1.551E-12 |
| PRR5L     | 0.1642802  | 1.602E-12 |
| CKLF      | 0.344578   | 1.783E-12 |
| GOLGA8R   | -0.1700886 | 1.793E-12 |
| PPM1F     | 0.1707337  | 1.818E-12 |
| SNHG32    | -0.2556628 | 1.832E-12 |
| RASAL3    | -0.1968484 | 2.002E-12 |
| IFI16     | 0.3598838  | 2.015E-12 |
| MAP3K2    | -0.2492906 | 2.127E-12 |
| R3HDM4    | 0.0388535  | 2.242E-12 |
| KCNK17    | 0.1710131  | 2.279E-12 |
| TNK2      | -0.1358678 | 2.321E-12 |
| PIK3CB    | -0.2314715 | 2.453E-12 |
| PROC      | -0.1237447 | 2.548E-12 |
| LINC02019 | -0.072567  | 2.806E-12 |
| EIF2S3    | -0.2647072 | 3.251E-12 |
| WDR45B    | -0.2364368 | 3.322E-12 |
| RAP2C     | -0.094221  | 3.541E-12 |
| RPS14     | 0.1797103  | 3.599E-12 |
| TSPAN32   | 0.1899854  | 3.884E-12 |
| H6PD      | -0.1135829 | 3.977E-12 |
| CTNBL1    | -0.0928327 | 3.997E-12 |
| DOCK1     | 0.2788711  | 4.263E-12 |
| DPP7      | 0.2784084  | 4.292E-12 |
| RAB1A     | 0.0324823  | 4.309E-12 |
| PIH1D1    | 0.0968886  | 4.405E-12 |
| MRPL51    | 0.1584757  | 4.784E-12 |
| DNM1L     | -0.0340896 | 4.84E-12  |
| DNMT3A    | -0.1656202 | 5.009E-12 |
| RTCB      | 0.0557173  | 5.017E-12 |

|            |            |           |
|------------|------------|-----------|
| NABP1      | 0.2882355  | 5.065E-12 |
| CNOT6      | -0.0817129 | 5.184E-12 |
| EVI2B      | -0.2680471 | 5.282E-12 |
| MXD1       | -0.2354872 | 5.445E-12 |
| APOE       | -0.0804928 | 5.68E-12  |
| FUT7       | -0.198323  | 5.79E-12  |
| MRPL11     | 0.1645004  | 5.922E-12 |
| POLR2C     | -0.0347984 | 5.938E-12 |
| ERGIC1     | 0.2216881  | 6.601E-12 |
| CAMKK2     | -0.1578104 | 6.794E-12 |
| GALNT2     | -0.29549   | 7.165E-12 |
| SEC22B     | -0.1224902 | 7.314E-12 |
| METTL26    | 0.2452815  | 7.611E-12 |
| PGS1       | -0.1374865 | 8.064E-12 |
| MRPS34     | 0.1356576  | 8.367E-12 |
| PHF5A      | -0.1555758 | 8.562E-12 |
| HADH       | 0.1130341  | 8.978E-12 |
| RABL2B     | -0.1384423 | 9.006E-12 |
| LAIR1      | -0.2819253 | 9.143E-12 |
| VDAC3      | 0.1948623  | 1.003E-11 |
| AC016773.1 | -0.0304016 | 1.071E-11 |
| ADAM17     | -0.1669738 | 1.079E-11 |
| SNRNP40    | 0.0108624  | 1.136E-11 |
| CHMP4B     | -0.1791358 | 1.221E-11 |
| CENPJ      | -0.1858481 | 1.241E-11 |
| MAF1       | 0.0675938  | 1.262E-11 |
| IL3RA      | -0.2806939 | 1.345E-11 |
| CBFB       | -0.1799515 | 1.368E-11 |
| NAA50      | 0.0647514  | 1.504E-11 |
| CASP2      | -0.169138  | 1.505E-11 |
| AP001059.3 | -0.036238  | 1.509E-11 |
| ITGB1BP1   | 0.0964244  | 1.525E-11 |
| PPP1R15A   | 0.3372759  | 1.586E-11 |
| P2RY8      | -0.280221  | 1.73E-11  |
| RPLP2      | -0.1331511 | 1.796E-11 |
| TMEM38B    | 0.2049818  | 1.989E-11 |
| FCHSD2     | -0.1604359 | 2.013E-11 |
| XYLT1      | -0.1089647 | 2.017E-11 |
| FLNA       | -0.2676688 | 2.04E-11  |
| GRK2       | -0.19206   | 2.057E-11 |
| MAZ        | -0.2191414 | 2.085E-11 |
| ASAH1      | -0.3465755 | 2.178E-11 |
| MAD2L1     | 0.0216777  | 2.214E-11 |
| RNF144A    | -0.1235993 | 2.241E-11 |
| SMN1       | -0.0763635 | 2.312E-11 |
| IFT57      | 0.1797931  | 2.403E-11 |
| CDKN2AIPN  | 0.003386   | 2.41E-11  |
| EPB41L3    | -0.0860926 | 2.417E-11 |
| HPRT1      | 0.1691475  | 2.45E-11  |
| TBCB       | 0.07697    | 2.453E-11 |

|            |            |           |
|------------|------------|-----------|
| MCM4       | 0.1356051  | 2.482E-11 |
| PALD1      | -0.1062613 | 2.577E-11 |
| ZMPSTE24   | -0.0464131 | 2.644E-11 |
| RPL37A     | -0.1525646 | 2.709E-11 |
| ATG12      | -0.1878082 | 2.768E-11 |
| FTH1       | -0.4167102 | 2.769E-11 |
| GNPAT      | -0.031319  | 2.786E-11 |
| MGST2      | 0.1975534  | 2.798E-11 |
| AP1M1      | -0.0302468 | 2.879E-11 |
| C9orf139   | -0.1225573 | 3.027E-11 |
| FAM117A    | -0.2569779 | 3.227E-11 |
| MFSD14A    | -0.0415777 | 3.234E-11 |
| RNF166     | -0.1970159 | 3.374E-11 |
| ATP2C1     | -0.2300208 | 3.401E-11 |
| SNHG19     | -0.1425944 | 3.489E-11 |
| HDAC3      | -0.0024655 | 3.635E-11 |
| MRPL12     | 0.1292048  | 3.649E-11 |
| TMEM41B    | -0.0359716 | 3.699E-11 |
| RPL28      | 0.1650596  | 3.715E-11 |
| LINC01355  | -0.1106723 | 3.826E-11 |
| MZT2A      | 0.1993548  | 3.948E-11 |
| AC026471.4 | -0.08131   | 4.019E-11 |
| ATF6B      | -0.0949817 | 4.391E-11 |
| MZT2B      | 0.2584169  | 4.471E-11 |
| HLA-DPB1   | 0.377652   | 4.489E-11 |
| GRK6       | 0.0861283  | 4.506E-11 |
| ABHD10     | -0.0154194 | 4.668E-11 |
| MAP4K3-DT  | 0.1688346  | 4.725E-11 |
| CRYGD      | 0.2449342  | 4.92E-11  |
| PHB        | 0.1737567  | 5.101E-11 |
| ZNF561     | -0.0521731 | 5.848E-11 |
| KANSL1L    | -0.1321576 | 5.91E-11  |
| HOXB2      | -0.189898  | 5.925E-11 |
| CISH       | 0.2219928  | 5.94E-11  |
| UQCC2      | 0.0936188  | 6.012E-11 |
| MGMT       | 0.1320801  | 6.111E-11 |
| LNX2       | -0.0753472 | 6.165E-11 |
| F8A3       | -0.0773401 | 6.619E-11 |
| C16orf54   | -0.1295431 | 7.221E-11 |
| ZNF511     | 0.1095561  | 7.499E-11 |
| SYNC       | -0.1318239 | 7.757E-11 |
| SMG1       | -0.2627164 | 8.487E-11 |
| C19orf25   | 0.0200602  | 8.72E-11  |
| AL354733.3 | -0.1236448 | 8.811E-11 |
| JKAMP      | -0.1271551 | 9.36E-11  |
| GNA15      | 0.236392   | 9.531E-11 |
| TNFAIP3    | -0.1429959 | 9.54E-11  |
| KCNAB2     | -0.2514409 | 9.823E-11 |
| TRIM2      | -0.0710571 | 9.832E-11 |
| CLCN7      | -0.1190516 | 9.941E-11 |

|            |            |           |
|------------|------------|-----------|
| DDX39A     | -0.0329763 | 1.004E-10 |
| STARD4-AS  | -0.0959556 | 1.049E-10 |
| LINC01409  | -0.1271767 | 1.068E-10 |
| MGAT2      | -0.0430925 | 1.086E-10 |
| RAB34      | 0.1195983  | 1.104E-10 |
| CARD19     | 0.1250259  | 1.123E-10 |
| DENND1B    | -0.2175423 | 1.136E-10 |
| PMAIP1     | 0.2287496  | 1.185E-10 |
| RAD51C     | 0.0280999  | 1.203E-10 |
| PHKG1      | -0.1338548 | 1.208E-10 |
| GYPC       | 0.2566142  | 1.251E-10 |
| ATP1B3     | 0.1648291  | 1.302E-10 |
| MRPL57     | 0.2098914  | 1.365E-10 |
| BMP2K      | -0.2409578 | 1.41E-10  |
| REX1BD     | 0.1439276  | 1.503E-10 |
| SLC40A1    | -0.5697423 | 1.512E-10 |
| SUCNR1     | 0.5186885  | 1.53E-10  |
| YARS       | 0.0093584  | 1.551E-10 |
| OSBPL8     | -0.2285698 | 1.593E-10 |
| CRLS1      | -0.0590329 | 1.607E-10 |
| IRF5       | -0.0816682 | 1.614E-10 |
| CCNC       | -0.0865284 | 1.629E-10 |
| PCMT1      | -0.2007396 | 1.681E-10 |
| ARPC5L     | 0.1218184  | 1.695E-10 |
| SMIM7      | -0.0044016 | 1.737E-10 |
| AC092747.4 | -0.0994376 | 1.754E-10 |
| ZBTB8OS    | -0.0273968 | 1.784E-10 |
| ATXN2L     | -0.0744365 | 1.886E-10 |
| ZNF516     | -0.1225425 | 1.937E-10 |
| CYHR1      | 0.1133157  | 1.937E-10 |
| NAA20      | 0.0618129  | 2.002E-10 |
| MAPRE1     | -0.0375628 | 2.003E-10 |
| CBWD5      | -0.1356451 | 2.026E-10 |
| TMEM128    | -0.0347998 | 2.143E-10 |
| GBGT1      | -0.0814358 | 2.18E-10  |
| AHR        | 0.2435507  | 2.267E-10 |
| SAMM50     | 0.0559037  | 2.271E-10 |
| AC092171.5 | -0.0510913 | 2.278E-10 |
| HEXD       | -0.127769  | 2.287E-10 |
| NAXE       | -0.0077871 | 2.368E-10 |
| AC009107.2 | -0.042643  | 2.372E-10 |
| DHX8       | -0.0361666 | 2.505E-10 |
| TAB2       | -0.0276109 | 2.521E-10 |
| MRPS12     | 0.1761594  | 2.542E-10 |
| ERAP1      | -0.0908502 | 2.638E-10 |
| HNRNPA1P4  | -0.0688172 | 2.642E-10 |
| HCFC1      | -0.0392741 | 2.699E-10 |
| ATP5MC1    | 0.2283858  | 2.732E-10 |
| GNS        | -0.0552616 | 2.791E-10 |
| REXO2      | 0.1038988  | 2.822E-10 |

|            |            |           |
|------------|------------|-----------|
| IGFBP7     | 0.1399365  | 2.992E-10 |
| RPL22      | -0.134685  | 3.156E-10 |
| INTS11     | 0.05412    | 3.377E-10 |
| RIOX1      | -0.0145366 | 3.385E-10 |
| PDLIM2     | 0.191538   | 3.483E-10 |
| NDUFV1     | 0.0775657  | 3.582E-10 |
| ZFAS1      | -0.2307808 | 3.618E-10 |
| AC010883.3 | -0.1015171 | 3.667E-10 |
| NPTN       | -0.0961699 | 3.677E-10 |
| C4orf48    | 0.2129872  | 3.749E-10 |
| AC004918.1 | -0.0644869 | 3.768E-10 |
| PDHA1      | 0.0366741  | 3.824E-10 |
| C14orf119  | -0.0028663 | 4.076E-10 |
| STON2      | 0.2298655  | 4.283E-10 |
| C11orf54   | -0.1290403 | 4.321E-10 |
| ZNRF1      | -0.0824968 | 4.388E-10 |
| GPX4       | -0.2151866 | 4.6E-10   |
| SNX13      | -0.0472195 | 4.701E-10 |
| LINC01082  | -0.0573672 | 4.738E-10 |
| CCDC107    | 0.0944794  | 4.823E-10 |
| PRRC2A     | -0.0349413 | 4.846E-10 |
| PARP1      | 0.227439   | 4.879E-10 |
| FHOD1      | -0.0712174 | 5.043E-10 |
| EPG5       | -0.0751554 | 5.057E-10 |
| FAHD2A     | -0.0933157 | 5.222E-10 |
| YBX3       | 0.2758624  | 5.252E-10 |
| AC083798.2 | -0.061026  | 5.259E-10 |
| FBRS       | 0.0221262  | 5.278E-10 |
| ENC1       | -0.0937777 | 5.387E-10 |
| BHLHE40    | -0.1813321 | 5.5E-10   |
| CEBPB      | -0.2558329 | 5.52E-10  |
| MEX3B      | -0.1408227 | 5.531E-10 |
| RNASEH2C   | 0.2151591  | 5.726E-10 |
| SCN1B      | 0.1500772  | 5.849E-10 |
| NAGPA      | -0.0074224 | 6.089E-10 |
| TP53       | -0.1248732 | 6.389E-10 |
| MIS18BP1   | -0.2482704 | 6.605E-10 |
| MRPL21     | 0.0870001  | 6.89E-10  |
| CD33       | 0.2041645  | 7.07E-10  |
| FKBP5      | 0.1486799  | 7.077E-10 |
| NDUFA13    | 0.1898155  | 7.079E-10 |
| DGKQ       | -0.0938029 | 7.276E-10 |
| S100A6     | 0.2834033  | 7.294E-10 |
| NME4       | 0.1332393  | 7.33E-10  |
| PIK3R1     | 0.3401022  | 7.432E-10 |
| GALK1      | 0.0740488  | 7.455E-10 |
| MRPL36     | 0.1154424  | 7.537E-10 |
| AC027601.6 | -0.167914  | 7.574E-10 |
| RPA3       | 0.0716352  | 7.608E-10 |
| MCM5       | 0.0283737  | 7.791E-10 |

|            |            |           |
|------------|------------|-----------|
| ELP5       | 0.0460659  | 7.858E-10 |
| RNF41      | -0.0658223 | 8.289E-10 |
| RCC2       | -0.1627037 | 8.315E-10 |
| TBC1D1     | -0.0766213 | 8.418E-10 |
| VPS39      | -0.0540924 | 8.459E-10 |
| RNASE2     | -0.4901644 | 8.914E-10 |
| SRPRA      | -0.0054479 | 8.966E-10 |
| FAM107B    | -0.2479031 | 9.124E-10 |
| MIR222HG   | -0.1072364 | 9.154E-10 |
| NMRAL1     | 0.0944552  | 9.214E-10 |
| PYCR2      | 0.0191021  | 9.246E-10 |
| ARID2      | -0.1008385 | 9.276E-10 |
| HMGB1      | -0.2204875 | 9.374E-10 |
| CREBZF     | -0.1852401 | 9.741E-10 |
| GPCPD1     | -0.1459218 | 9.774E-10 |
| EPM2AIP1   | -0.1849199 | 1.013E-09 |
| PGAM1      | -0.1753097 | 1.028E-09 |
| RFFL       | -0.1726813 | 1.035E-09 |
| SACM1L     | -0.0036459 | 1.038E-09 |
| TEX264     | 0.1174939  | 1.051E-09 |
| TRAPPC4    | -0.0159173 | 1.061E-09 |
| RAPGEF1    | -0.0725706 | 1.062E-09 |
| CLPP       | 0.089913   | 1.077E-09 |
| SIPA1L3    | -0.0532767 | 1.083E-09 |
| SELENOK    | -0.0927218 | 1.104E-09 |
| PLEKHJ1    | 0.0723925  | 1.148E-09 |
| ZADH2      | -0.027445  | 1.153E-09 |
| STK17B     | 0.2557637  | 1.157E-09 |
| CALR       | -0.317976  | 1.159E-09 |
| PPP1R10    | 0.2172152  | 1.218E-09 |
| AHSA1      | 0.0328327  | 1.231E-09 |
| AC103591.3 | 0.2395834  | 1.248E-09 |
| SLC38A10   | -0.0941111 | 1.249E-09 |
| MGRN1      | -0.0787081 | 1.286E-09 |
| TES        | -0.1870162 | 1.29E-09  |
| TP53INP1   | -0.1382601 | 1.294E-09 |
| PNP        | 0.2064108  | 1.325E-09 |
| ARRDC2     | -0.1436776 | 1.328E-09 |
| ATP6AP1    | -0.0967539 | 1.353E-09 |
| MRPS23     | 0.02363    | 1.363E-09 |
| CLASP1     | -0.0702005 | 1.441E-09 |
| PTTG1IP    | -0.1837947 | 1.499E-09 |
| AC008105.3 | -0.0566904 | 1.511E-09 |
| HLA-C      | 0.3422837  | 1.518E-09 |
| TOP2B      | -0.2232132 | 1.523E-09 |
| JAGN1      | 0.1781782  | 1.535E-09 |
| NPW        | 0.2602498  | 1.57E-09  |
| TNFAIP8L1  | -0.1063942 | 1.582E-09 |
| AMN        | 0.1932466  | 1.584E-09 |
| PDLIM7     | -0.1131615 | 1.605E-09 |



|            |            |           |
|------------|------------|-----------|
| TSPYL4     | 0.0730803  | 1.66E-09  |
| THRA       | 0.0033867  | 1.683E-09 |
| MRPS2      | 0.0610472  | 1.684E-09 |
| RPL18      | 0.160031   | 1.691E-09 |
| LMO7       | -0.0959107 | 1.71E-09  |
| NDUFAF3    | 0.1724371  | 1.767E-09 |
| ARHGAP4    | 0.1332041  | 1.783E-09 |
| CHP1       | -0.1157611 | 1.816E-09 |
| GRHPR      | 0.1768661  | 1.828E-09 |
| MAN2C1     | 0.0063497  | 1.83E-09  |
| WHAMM      | -0.1479258 | 1.883E-09 |
| DAPK1      | 0.2176739  | 1.963E-09 |
| PINK1      | -0.0257634 | 1.988E-09 |
| DHX40      | -0.095666  | 2.025E-09 |
| RREB1      | -0.2654752 | 2.063E-09 |
| POLR2I     | 0.0501081  | 2.064E-09 |
| AC007336.1 | -0.1438052 | 2.089E-09 |
| CCDC106    | 0.0185362  | 2.105E-09 |
| MCM3AP     | -0.101869  | 2.163E-09 |
| HOMER3     | -0.176811  | 2.165E-09 |
| ACOX1      | -0.0968797 | 2.203E-09 |
| EXOSC8     | -0.0087184 | 2.205E-09 |
| AUH        | -0.057758  | 2.327E-09 |
| IDS        | -0.2575738 | 2.368E-09 |
| DEK        | 0.2399276  | 2.402E-09 |
| UBAC1      | 0.0118162  | 2.404E-09 |
| MRPL27     | 0.0977013  | 2.476E-09 |
| SNHG30     | -0.0210948 | 2.495E-09 |
| POLE       | 0.1131226  | 2.593E-09 |
| GNPTG      | -0.1193797 | 2.615E-09 |
| CPT1A      | -0.2173597 | 2.685E-09 |
| TTF2       | 0.0382759  | 2.757E-09 |
| MRPS28     | 0.0382479  | 2.759E-09 |
| SLC39A1    | -0.0042534 | 2.789E-09 |
| IL9R       | -0.0563218 | 2.796E-09 |
| MATR3.1    | -0.1040915 | 2.808E-09 |
| DYNC1H1    | -0.154825  | 2.815E-09 |
| SIVA1      | 0.1204859  | 2.842E-09 |
| DAB2       | 0.1747161  | 2.855E-09 |
| DCTPP1     | 0.1379289  | 2.889E-09 |
| SPARC      | 0.1939064  | 2.906E-09 |
| RIPOR2     | 0.2198999  | 2.919E-09 |
| MYCBP      | 0.0012544  | 2.982E-09 |
| TXLNA      | 0.0331003  | 3.055E-09 |
| OSGEP      | 0.0918703  | 3.06E-09  |
| CNPPD1     | 0.0025603  | 3.14E-09  |
| LAMTOR3    | -0.0987105 | 3.19E-09  |
| COPG1      | -0.0428374 | 3.209E-09 |
| LRRC41     | 0.0313803  | 3.253E-09 |
| EMC6       | 0.0637426  | 3.432E-09 |

|            |            |           |
|------------|------------|-----------|
| AC004540.2 | -0.1078675 | 3.436E-09 |
| NUP153     | -0.0389506 | 3.499E-09 |
| TRIM16     | 0.1654935  | 3.59E-09  |
| CYSLTR1    | 0.1828467  | 3.594E-09 |
| LTB        | 0.4114259  | 3.597E-09 |
| STN1       | 0.148099   | 3.635E-09 |
| CLU        | 0.3503461  | 3.675E-09 |
| INKA1      | 0.2320798  | 3.706E-09 |
| RHEB       | -0.0626741 | 3.725E-09 |
| MRPS10     | 0.0269301  | 3.79E-09  |
| ATAD2B     | -0.0546925 | 3.808E-09 |
| MANBA      | -0.1834537 | 3.849E-09 |
| ERG        | 0.2443304  | 3.864E-09 |
| EIF5A      | -0.0138809 | 3.887E-09 |
| SNRPA1     | 0.0662618  | 3.893E-09 |
| HERC2      | -0.2337864 | 3.938E-09 |
| SOCS1      | 0.2060252  | 3.946E-09 |
| ALG3       | 0.0584395  | 3.965E-09 |
| STAB1      | -0.2170197 | 3.982E-09 |
| POLR2H     | 0.0590383  | 4.081E-09 |
| DHFR       | 0.0524044  | 4.101E-09 |
| ZCCHC3     | -0.0829044 | 4.205E-09 |
| ATP2A3     | -0.1819632 | 4.25E-09  |
| NMT1       | -0.1603326 | 4.295E-09 |
| TMEM11     | 0.0429649  | 4.444E-09 |
| MAPKAPK5-  | 0.0135859  | 4.481E-09 |
| EFHC1      | -0.0613755 | 4.619E-09 |
| ANKRD33B   | -0.0972472 | 4.624E-09 |
| COX7A2L    | -0.1633074 | 4.698E-09 |
| PUF60      | 0.0088329  | 4.777E-09 |
| UTP18      | 0.0916994  | 4.86E-09  |
| CASTOR2    | -0.0764282 | 4.886E-09 |
| UBXN6      | -0.0297615 | 4.888E-09 |
| ATP8A1     | -0.096486  | 4.913E-09 |
| MYH11      | -0.0641168 | 5.099E-09 |
| CD7        | -0.2183798 | 5.212E-09 |
| HECTD1     | -0.1889972 | 5.243E-09 |
| C11orf74   | 0.1688341  | 5.277E-09 |
| SMAD6      | -0.0553449 | 5.338E-09 |
| ZNF790-AS1 | -0.0543111 | 5.359E-09 |
| SUPT5H     | -0.0294445 | 5.366E-09 |
| DGCR6L     | -0.0143318 | 5.376E-09 |
| EMC7       | -0.0079726 | 5.454E-09 |
| RABGGTB    | -0.0478048 | 5.591E-09 |
| ARL17B     | -0.0615626 | 5.61E-09  |
| PPIH       | 0.0400922  | 5.611E-09 |
| MTA2       | -0.0213149 | 5.763E-09 |
| PRPF19     | 0.0233246  | 5.773E-09 |
| NIBAN1     | -0.2757539 | 5.96E-09  |
| ABT1       | 0.0260513  | 5.999E-09 |

|            |            |           |
|------------|------------|-----------|
| SNRPD3     | -0.2166177 | 6.174E-09 |
| HAVCR2     | -0.004877  | 6.196E-09 |
| MPV17L     | -0.0650481 | 6.308E-09 |
| AL021368.2 | -0.2062399 | 6.431E-09 |
| RRP7A      | 0.1096047  | 6.493E-09 |
| UGGT1      | -0.0643878 | 6.553E-09 |
| TTC24      | 0.127014   | 6.636E-09 |
| GET1       | 0.0121976  | 6.664E-09 |
| SDSL       | 0.1301911  | 6.788E-09 |
| PAQR3      | -0.0523306 | 6.799E-09 |
| TRIM56     | -0.273504  | 6.878E-09 |
| PSENE1     | -0.0575663 | 7.208E-09 |
| SVIP       | 0.1835218  | 7.273E-09 |
| HMG20A     | -0.0016421 | 7.295E-09 |
| GTF3C1     | 0.0499502  | 7.321E-09 |
| AC025159.1 | -0.0566746 | 7.405E-09 |
| AP3M1      | -0.0717536 | 7.501E-09 |
| NRF1       | -0.0352655 | 7.529E-09 |
| PITHD1     | 0.0095025  | 7.543E-09 |
| AKNA       | -0.0651621 | 7.557E-09 |
| SLC20A2    | -0.1219398 | 7.644E-09 |
| WASIR2     | -0.054171  | 7.755E-09 |
| NELFA      | 0.0217014  | 8.017E-09 |
| MVB12A     | 0.0558628  | 8.124E-09 |
| H2AFY      | 0.3317026  | 8.15E-09  |
| DENND6B    | -0.0893807 | 8.276E-09 |
| C19orf48   | 0.1561335  | 8.276E-09 |
| IGHM       | 0.4387597  | 8.311E-09 |
| EEF1G      | 0.1677144  | 8.364E-09 |
| PTCD3      | -0.0437352 | 8.406E-09 |
| PSMF1      | 0.0033622  | 8.438E-09 |
| NFKBIL1    | 0.004693   | 8.501E-09 |
| GOLIM4     | -0.1777461 | 8.631E-09 |
| MIGA1      | -0.0203164 | 8.642E-09 |
| AL390728.6 | -0.1269917 | 8.916E-09 |
| GADD45A    | 0.1902294  | 8.925E-09 |
| NBDY       | 0.1511969  | 8.991E-09 |
| USO1       | -0.078269  | 9E-09     |
| SP1        | -0.1297917 | 9.061E-09 |
| HLA-DMA    | 0.1948061  | 9.07E-09  |
| EP300      | -0.1961117 | 9.151E-09 |
| NCAPD3     | 0.0433322  | 9.194E-09 |
| GNB4       | 0.070165   | 9.333E-09 |
| HM13       | 0.1136699  | 9.347E-09 |
| AC044849.1 | 0.1531216  | 9.641E-09 |
| COMMD9     | -0.0921309 | 9.911E-09 |
| METRNL     | 0.1533833  | 1.004E-08 |
| RFX2       | -0.1271533 | 1.042E-08 |
| VWF        | -0.2785079 | 1.044E-08 |
| ZBTB44     | -0.2088784 | 1.056E-08 |

|            |            |           |
|------------|------------|-----------|
| ZNF680     | -0.1184937 | 1.062E-08 |
| JDP2       | -0.0306969 | 1.07E-08  |
| MBD1       | -0.0349601 | 1.071E-08 |
| ASXL1      | 0.037232   | 1.077E-08 |
| BCKDK      | 0.0841164  | 1.079E-08 |
| ZNF362     | -0.0395874 | 1.095E-08 |
| ZNF302     | -0.1041302 | 1.098E-08 |
| BST2       | 0.2451969  | 1.098E-08 |
| HDDC3      | 0.1074273  | 1.114E-08 |
| PNPO       | 0.0041787  | 1.116E-08 |
| SS18       | -0.1401979 | 1.13E-08  |
| TMBIM6     | -0.16548   | 1.13E-08  |
| NSD1       | -0.0896948 | 1.173E-08 |
| ARRDC1     | -0.0316095 | 1.198E-08 |
| SH3BP1     | -0.0388513 | 1.232E-08 |
| DKC1       | 0.1069635  | 1.246E-08 |
| TRAPPC11   | -0.0746067 | 1.258E-08 |
| E2F4       | -0.027872  | 1.262E-08 |
| RANGRF     | -0.0225752 | 1.268E-08 |
| IMPDH2     | 0.2569313  | 1.275E-08 |
| CHROMR     | -0.1942743 | 1.278E-08 |
| CTU1       | 0.0369905  | 1.281E-08 |
| RHOH       | -0.1218307 | 1.301E-08 |
| MRPL15     | 0.1152048  | 1.313E-08 |
| RNPEPL1    | -0.0593108 | 1.321E-08 |
| CALCOCO1   | -0.0461589 | 1.326E-08 |
| AC100810.1 | 0.062505   | 1.331E-08 |
| POLG2      | -0.0871815 | 1.336E-08 |
| ARL8A      | -0.0445084 | 1.344E-08 |
| FAM160B1   | -0.0558634 | 1.364E-08 |
| USP39      | -0.0205826 | 1.371E-08 |
| AL109811.2 | -0.0354828 | 1.388E-08 |
| SLC48A1    | -0.1074681 | 1.424E-08 |
| EMILIN2    | 0.1104282  | 1.438E-08 |
| CCNG2      | -0.1076563 | 1.471E-08 |
| PPP4C      | -0.022689  | 1.513E-08 |
| MED27      | -0.0005186 | 1.542E-08 |
| MRPL44     | 0.0039607  | 1.635E-08 |
| STIP1      | 0.0863922  | 1.645E-08 |
| THOC1      | -0.105218  | 1.681E-08 |
| DNAJC30    | 0.0054041  | 1.709E-08 |
| ATP6V0A2   | -0.2143625 | 1.722E-08 |
| CTBP1      | -0.1800971 | 1.747E-08 |
| SCAF1      | -0.0121156 | 1.747E-08 |
| ATG14      | -0.084722  | 1.777E-08 |
| RFXANK     | 0.0759018  | 1.792E-08 |
| MAN2B2     | -0.0913826 | 1.824E-08 |
| ZMYND11    | -0.0459502 | 1.925E-08 |
| UBE2M      | 0.0769032  | 1.932E-08 |
| LSM6       | 0.0702475  | 1.941E-08 |

|            |            |           |
|------------|------------|-----------|
| PET100     | -0.210741  | 1.947E-08 |
| PNPLA8     | -0.0141198 | 1.997E-08 |
| PIP5K1A    | -0.0229716 | 2.018E-08 |
| TXN2       | 0.1660157  | 2.04E-08  |
| ZBTB16     | -0.2324251 | 2.065E-08 |
| EBNA1BP2   | 0.1061491  | 2.067E-08 |
| NDE1       | 0.0630543  | 2.088E-08 |
| FBXW2      | -0.0529593 | 2.094E-08 |
| ANKRD13D   | -0.0480193 | 2.107E-08 |
| AK5        | 0.1726388  | 2.111E-08 |
| DMAC2      | -0.0136966 | 2.19E-08  |
| KHSRP      | -0.0698441 | 2.23E-08  |
| LINC00667  | -0.0445028 | 2.231E-08 |
| SCNM1      | 0.0059324  | 2.234E-08 |
| SDHB       | 0.0048308  | 2.238E-08 |
| CHMP1B     | -0.1247534 | 2.24E-08  |
| HAUS7      | -0.0593245 | 2.248E-08 |
| TOP1MT     | -0.1781672 | 2.252E-08 |
| MYDGF      | 0.1419247  | 2.26E-08  |
| SESN1      | 0.059023   | 2.286E-08 |
| URM1       | 0.0447626  | 2.289E-08 |
| NCOA3      | -0.1337994 | 2.308E-08 |
| ADAM8      | -0.159364  | 2.321E-08 |
| LYN        | 0.1823152  | 2.33E-08  |
| TRPS1      | 0.1255627  | 2.36E-08  |
| SORT1      | 0.0922887  | 2.389E-08 |
| EXOC4      | -0.0416415 | 2.419E-08 |
| NDUFA8     | 0.0727944  | 2.421E-08 |
| PIN1       | 0.059182   | 2.462E-08 |
| BSG        | -0.1879481 | 2.463E-08 |
| HOXA6      | -0.0848901 | 2.485E-08 |
| SIN3B      | -0.0408382 | 2.555E-08 |
| GORASP1    | -0.0144283 | 2.566E-08 |
| AC025171.4 | -0.0512157 | 2.621E-08 |
| ZC3H7B     | -0.0520931 | 2.676E-08 |
| RBBP4      | -0.1555567 | 2.727E-08 |
| TUBA1B     | 0.3531574  | 2.732E-08 |
| CASS4      | 0.1391121  | 2.737E-08 |
| FAM122B    | -0.0692628 | 2.738E-08 |
| HIST1H4J   | -0.0618529 | 2.763E-08 |
| ABTB1      | -0.0351305 | 2.766E-08 |
| MCM6       | 0.0974612  | 2.784E-08 |
| TMCC1      | -0.0588125 | 2.804E-08 |
| MKRN2      | -0.0108358 | 2.817E-08 |
| BLVRB      | 0.1721294  | 2.866E-08 |
| MRPL37     | 0.1111305  | 3.058E-08 |
| DCTN5      | -0.0508092 | 3.089E-08 |
| GSK3B      | -0.0669724 | 3.133E-08 |
| TRIM27     | -0.0974883 | 3.148E-08 |
| AP5B1      | -0.1445641 | 3.158E-08 |

|            |            |           |
|------------|------------|-----------|
| GNL3       | -0.0566817 | 3.176E-08 |
| FMNL1      | -0.1238736 | 3.21E-08  |
| RMC1       | -0.0191932 | 3.224E-08 |
| NDUFAF8    | 0.0969059  | 3.241E-08 |
| WDR26      | -0.0593333 | 3.249E-08 |
| UNKL       | -0.1070651 | 3.26E-08  |
| YIPF3      | -0.0001599 | 3.303E-08 |
| NGDN       | -0.0379263 | 3.319E-08 |
| RNFT1      | -0.1183897 | 3.352E-08 |
| CD244      | -0.0845811 | 3.386E-08 |
| RBM3       | -0.2296399 | 3.396E-08 |
| LAP3       | 0.035831   | 3.465E-08 |
| PPM1A      | -0.0551338 | 3.489E-08 |
| CSF3R      | -0.2797331 | 3.552E-08 |
| UBQLN1     | -0.0537359 | 3.563E-08 |
| LINC00685  | -0.0841128 | 3.622E-08 |
| LSM4       | 0.1474047  | 3.662E-08 |
| CNOT11     | -0.0770736 | 3.668E-08 |
| SIRT2      | 0.0147515  | 3.751E-08 |
| TMEM50B    | -0.0572494 | 3.754E-08 |
| ATP1B1     | 0.2816336  | 3.798E-08 |
| ZNF181     | -0.0083584 | 3.918E-08 |
| C22orf39   | -0.034514  | 3.954E-08 |
| ADAP1      | -0.1126801 | 4.003E-08 |
| PPP1R15B   | 0.0630301  | 4.086E-08 |
| KRIT1      | -0.0291021 | 4.097E-08 |
| SYNE3      | 0.1366136  | 4.231E-08 |
| ITGA4      | -0.2457529 | 4.247E-08 |
| PPIE       | -0.0087379 | 4.292E-08 |
| SF3B4      | -0.0438487 | 4.311E-08 |
| UBE2S      | 0.0991441  | 4.382E-08 |
| RBM4B      | -0.0177757 | 4.408E-08 |
| UCP2       | 0.1161324  | 4.441E-08 |
| CYB561A3   | -0.0163264 | 4.493E-08 |
| NDUFB8     | 0.1887625  | 4.52E-08  |
| RPL10      | 0.1337422  | 4.68E-08  |
| INTS8      | -0.0050145 | 4.712E-08 |
| AIF1L      | 0.1958465  | 4.746E-08 |
| COTL1      | -0.1026829 | 4.8E-08   |
| TAGAP      | -0.0549222 | 4.805E-08 |
| GUK1       | 0.1032729  | 4.848E-08 |
| LINC01226  | -0.2401482 | 4.891E-08 |
| ANKAR      | -0.028201  | 4.921E-08 |
| AC245297.3 | -0.2385449 | 4.943E-08 |
| NDUFA7     | 0.0983781  | 5.088E-08 |
| AC138150.1 | -0.0182444 | 5.149E-08 |
| AC253572.2 | 0.1973721  | 5.156E-08 |
| CD44       | 0.2924685  | 5.158E-08 |
| RING1      | -0.039142  | 5.196E-08 |
| METTL5     | 0.1069521  | 5.238E-08 |

|            |            |           |
|------------|------------|-----------|
| RNH1       | 0.1036112  | 5.243E-08 |
| RPL30      | -0.119456  | 5.302E-08 |
| RBM12      | -0.0076253 | 5.323E-08 |
| MIB1       | -0.1722744 | 5.359E-08 |
| COQ5       | 0.0528074  | 5.529E-08 |
| TXNRD1     | -0.1715519 | 5.568E-08 |
| SSNA1      | 0.1382799  | 5.603E-08 |
| MTHFD1     | 0.0058851  | 5.617E-08 |
| CBX3       | -0.1949432 | 5.629E-08 |
| GPAA1      | 0.0586807  | 5.664E-08 |
| DTYMK      | 0.0618789  | 5.794E-08 |
| CEBPG      | -0.0387571 | 5.829E-08 |
| SSH2       | -0.0174897 | 5.867E-08 |
| LPIN1      | -0.054811  | 5.878E-08 |
| ROBO3      | 0.1056499  | 5.904E-08 |
| KLF4       | 0.0720463  | 6.035E-08 |
| TNIP2      | 0.0528905  | 6.07E-08  |
| NUP58      | -0.0024828 | 6.075E-08 |
| FAM192A    | -0.0434167 | 6.183E-08 |
| ZC3H18     | 0.0469083  | 6.524E-08 |
| PCID2      | 0.0329826  | 6.547E-08 |
| CDK4       | 0.1178492  | 6.557E-08 |
| APAF1      | -0.1068013 | 6.565E-08 |
| CISD1      | 0.0753496  | 6.568E-08 |
| SLC9A3R1   | 0.0147119  | 6.646E-08 |
| DEDD2      | -0.0197151 | 6.707E-08 |
| DERA       | 0.0092456  | 6.854E-08 |
| ZNF433-AS1 | -0.0968599 | 6.869E-08 |
| SIPA1      | -0.1209655 | 6.95E-08  |
| ZNF746     | -0.0350471 | 6.961E-08 |
| BUD31      | 0.0567683  | 7.008E-08 |
| ARF5       | -0.1160389 | 7.026E-08 |
| ZNF66      | -0.1282062 | 7.032E-08 |
| TMEM245    | -0.083206  | 7.11E-08  |
| GABARAPL1  | -0.0870651 | 7.111E-08 |
| KCTD5      | -0.0977611 | 7.155E-08 |
| TUBA1C     | 0.1113822  | 7.157E-08 |
| AC108863.2 | -0.0407123 | 7.168E-08 |
| CXorf38    | 0.1502764  | 7.231E-08 |
| RCBTB1     | -0.0912615 | 7.239E-08 |
| TACC3      | -0.0067794 | 7.295E-08 |
| LDLRAD2    | 0.1688831  | 7.309E-08 |
| FAM76B     | -0.0500449 | 7.354E-08 |
| USP4       | -0.0417425 | 7.36E-08  |
| ZNF714     | -0.0895413 | 7.422E-08 |
| ARL6IP6    | -0.0311447 | 7.437E-08 |
| UBR5-AS1   | -0.181593  | 7.505E-08 |
| RPP25L     | 0.0665627  | 7.616E-08 |
| ZNF490     | -0.076735  | 7.669E-08 |
| YDJC       | 0.0657538  | 7.683E-08 |

|            |            |           |
|------------|------------|-----------|
| REPIN1     | -0.1270563 | 7.744E-08 |
| ABHD14A    | 0.110904   | 7.814E-08 |
| LETM1      | -0.0266579 | 7.829E-08 |
| GIGYF1     | -0.0462758 | 8.001E-08 |
| FAM41C     | -0.058244  | 8.025E-08 |
| SNX20      | 0.0111289  | 8.026E-08 |
| FAM102A    | -0.0817369 | 8.057E-08 |
| AP2A1      | -0.0159404 | 8.083E-08 |
| ARID5A     | -0.0894828 | 8.084E-08 |
| CBLL1      | -0.0656808 | 8.092E-08 |
| DDIT4      | -0.117069  | 8.102E-08 |
| DPY19L4    | -0.0755016 | 8.125E-08 |
| COPS6      | 0.1143169  | 8.207E-08 |
| THOC3      | -0.0867363 | 8.228E-08 |
| COASY      | -0.0031846 | 8.275E-08 |
| AKR1A1     | 0.0889291  | 8.311E-08 |
| AC025040.1 | -0.0953948 | 8.362E-08 |
| SMG7       | -0.0165706 | 8.479E-08 |
| FAM207A    | 0.1074809  | 8.508E-08 |
| DMAP1      | -0.0112887 | 8.593E-08 |
| C16orf74   | -0.1317086 | 8.595E-08 |
| DNAJC9     | 0.1090503  | 8.645E-08 |
| TMED2      | -0.0002608 | 8.833E-08 |
| ATP8B4     | -0.2847312 | 8.834E-08 |
| OIP5-AS1   | -0.2152811 | 8.914E-08 |
| MAP7D3     | 0.0376656  | 8.943E-08 |
| NPM3       | 0.0841785  | 9.042E-08 |
| C20orf96   | -0.0653508 | 9.233E-08 |
| EXOSC5     | 0.1100052  | 9.239E-08 |
| RAB4B      | -0.0394966 | 9.268E-08 |
| BOLA2B     | -0.0874117 | 9.413E-08 |
| GCN1       | 0.0118245  | 9.432E-08 |
| PCMTD2     | -0.0539404 | 9.599E-08 |
| COPS7B     | -0.013253  | 9.607E-08 |
| GMNN       | 0.0683271  | 9.62E-08  |
| GTF2IRD2B  | -0.0592188 | 9.677E-08 |
| EIF2D      | -0.046949  | 9.746E-08 |
| PPP1CA     | 0.094843   | 9.802E-08 |
| HSBP1L1    | 0.1401698  | 9.842E-08 |
| FRYL       | -0.0600569 | 9.86E-08  |
| MCM3       | 0.0840502  | 9.97E-08  |
| PDAP1      | 0.0040911  | 1.019E-07 |
| RETREG2    | -0.0265733 | 1.022E-07 |
| FANCA      | -0.0368313 | 1.025E-07 |
| NHLRC3     | -0.1103793 | 1.027E-07 |
| STUB1      | 0.1025452  | 1.033E-07 |
| AC005921.2 | -0.0210068 | 1.049E-07 |
| SEMA4D     | 0.0212636  | 1.05E-07  |
| GTF3C6     | 0.0149952  | 1.079E-07 |
| COX15      | -0.0214197 | 1.081E-07 |



|           |            |           |
|-----------|------------|-----------|
| MT-CYB    | 0.2007046  | 1.098E-07 |
| SURF4     | -0.0639182 | 1.105E-07 |
| KLHDC3    | 0.0125087  | 1.106E-07 |
| TGFBR2    | 0.0440504  | 1.108E-07 |
| ADCY7     | -0.0724249 | 1.115E-07 |
| SPSB1     | -0.0534612 | 1.123E-07 |
| RABL2A    | -0.0848208 | 1.126E-07 |
| NSFL1C    | 0.0167907  | 1.128E-07 |
| SEPTIN11  | 0.2052498  | 1.148E-07 |
| STOML2    | 0.140233   | 1.159E-07 |
| STRAP     | 0.0628001  | 1.167E-07 |
| C1orf52   | -0.008026  | 1.171E-07 |
| FBH1      | -0.0005168 | 1.18E-07  |
| GNG5      | -0.2032812 | 1.183E-07 |
| SMURF2    | -0.0979832 | 1.183E-07 |
| NRROS     | 0.0009584  | 1.188E-07 |
| NOP14     | 0.0486258  | 1.2E-07   |
| NLRC3     | -0.1062932 | 1.204E-07 |
| MAML1     | -0.0648239 | 1.222E-07 |
| TMEM170A  | 0.0137054  | 1.229E-07 |
| MDP1      | 0.0797756  | 1.235E-07 |
| MYB       | -0.2388324 | 1.24E-07  |
| ARL6IP1   | -0.2186989 | 1.246E-07 |
| IFRD2     | 0.0618546  | 1.265E-07 |
| TRIP4     | -0.0902097 | 1.3E-07   |
| GATAD2B   | -0.1093067 | 1.311E-07 |
| ALOX5AP   | 0.1564579  | 1.324E-07 |
| RANBP1    | 0.1691126  | 1.326E-07 |
| RBM23     | -0.1048389 | 1.329E-07 |
| MAPK6     | -0.1379212 | 1.339E-07 |
| BRD9      | -0.011403  | 1.347E-07 |
| ZNF687    | -0.028384  | 1.357E-07 |
| TBC1D2    | -0.0660443 | 1.36E-07  |
| ITPK1     | -0.0964824 | 1.367E-07 |
| RAMAC     | -0.0668342 | 1.421E-07 |
| MFSD14C   | -0.0915784 | 1.434E-07 |
| RPL10A    | 0.1298612  | 1.435E-07 |
| POC5      | -0.021914  | 1.446E-07 |
| THYN1     | 0.0142208  | 1.449E-07 |
| LINC01252 | -0.0721084 | 1.459E-07 |
| MAPRE2    | 0.0877865  | 1.481E-07 |
| CS        | -0.0258798 | 1.493E-07 |
| C5orf51   | -0.0100695 | 1.494E-07 |
| KLF13     | -0.1623485 | 1.501E-07 |
| ARL6IP4   | 0.2208958  | 1.505E-07 |
| POLDIP3   | -0.0021049 | 1.521E-07 |
| TRIM28    | 0.0084349  | 1.524E-07 |
| APMAP     | 0.0228887  | 1.529E-07 |
| RNF24     | -0.2014135 | 1.531E-07 |
| ICAM3     | 0.1426628  | 1.556E-07 |

|            |            |           |
|------------|------------|-----------|
| MFSD1      | -0.1627314 | 1.567E-07 |
| PPP1R3E    | -0.1465216 | 1.586E-07 |
| RRP9       | 0.0205144  | 1.598E-07 |
| FBXO22     | -0.208723  | 1.616E-07 |
| OTUB1      | -0.0433509 | 1.619E-07 |
| METT15     | -0.0694967 | 1.624E-07 |
| FBXO11     | -0.0339141 | 1.639E-07 |
| ZNF593     | 0.0971247  | 1.654E-07 |
| HIC1       | -0.046698  | 1.668E-07 |
| CERS5      | -0.0147329 | 1.688E-07 |
| PHPT1      | 0.1937178  | 1.703E-07 |
| VRK3       | 0.0369409  | 1.711E-07 |
| LZTFL1     | -0.0106168 | 1.714E-07 |
| EPB41      | -0.170434  | 1.715E-07 |
| RPS3       | 0.1493603  | 1.722E-07 |
| COMMD7     | 0.1738964  | 1.722E-07 |
| NCKAP1L    | -0.1586934 | 1.724E-07 |
| PGGT1B     | -0.0829652 | 1.724E-07 |
| NAGK       | 0.0005832  | 1.726E-07 |
| BAALC      | 0.1836445  | 1.735E-07 |
| ADH5       | -0.0508037 | 1.741E-07 |
| LSM14B     | 0.0531651  | 1.808E-07 |
| MRPL32     | 0.0343633  | 1.811E-07 |
| RPL36A     | -0.1479175 | 1.814E-07 |
| FUS        | 0.241027   | 1.835E-07 |
| GPS2       | -0.0930347 | 1.853E-07 |
| NFXL1      | 0.0038828  | 1.857E-07 |
| USP22      | -0.0553896 | 1.861E-07 |
| TOPBP1     | -0.0558928 | 1.863E-07 |
| BRWD1      | -0.1472367 | 1.909E-07 |
| SMC2       | -0.1014245 | 1.925E-07 |
| NUP42      | -0.0405393 | 1.972E-07 |
| GAB3       | -0.0448204 | 1.974E-07 |
| AC123768.4 | -0.0334115 | 1.991E-07 |
| PSMD3      | 0.0361597  | 2.001E-07 |
| PSMG4      | 0.0706946  | 2.011E-07 |
| WSB1       | -0.2302978 | 2.014E-07 |
| THAP12     | 0.0588587  | 2.058E-07 |
| HECA       | -0.0165051 | 2.095E-07 |
| SPTLC1     | -0.0442485 | 2.097E-07 |
| XPO4       | -0.0608666 | 2.105E-07 |
| PKIG       | -0.0976245 | 2.125E-07 |
| KANSL1     | -0.1123042 | 2.125E-07 |
| ELP3       | -0.027311  | 2.162E-07 |
| MTMR9      | 0.0179754  | 2.179E-07 |
| GOSR1      | -0.0023919 | 2.186E-07 |
| WDFY1      | -0.1518652 | 2.193E-07 |
| APOOL      | -0.0388164 | 2.195E-07 |
| CHMP3      | -0.0656653 | 2.198E-07 |
| SUDS3      | 0.0241125  | 2.199E-07 |

|           |            |           |
|-----------|------------|-----------|
| DHRS4     | -0.0117222 | 2.204E-07 |
| IST1      | -0.1331661 | 2.21E-07  |
| IREB2     | -0.0302128 | 2.211E-07 |
| FDX1      | -0.0395184 | 2.213E-07 |
| MRPL38    | 0.0671972  | 2.217E-07 |
| PDCD5     | 0.1457626  | 2.225E-07 |
| LRRK1     | -0.110829  | 2.229E-07 |
| DGKE      | -0.1409421 | 2.237E-07 |
| B4GALT5   | -0.128412  | 2.244E-07 |
| GAMT      | 0.1788257  | 2.318E-07 |
| ANKRD49   | -0.0332001 | 2.326E-07 |
| SLC9A3R2  | 0.0998603  | 2.335E-07 |
| ARL6IP5   | 0.3133017  | 2.35E-07  |
| DUSP10    | -0.1049045 | 2.354E-07 |
| FHL3      | -0.1441316 | 2.357E-07 |
| NT5C3B    | 0.0553671  | 2.358E-07 |
| LSG1      | -0.1048506 | 2.368E-07 |
| LIX1L     | -0.0314581 | 2.371E-07 |
| HSPD1     | 0.2171032  | 2.389E-07 |
| BUD23     | -0.0112556 | 2.391E-07 |
| SERF2     | 0.2094794  | 2.405E-07 |
| RRP36     | 0.0029068  | 2.425E-07 |
| QTRT1     | 0.0209372  | 2.439E-07 |
| ATP2B4    | -0.0892099 | 2.447E-07 |
| IVD       | 0.0194706  | 2.447E-07 |
| AMD1      | -0.1152559 | 2.455E-07 |
| TSIX      | -0.0636424 | 2.46E-07  |
| TXN       | 0.241642   | 2.468E-07 |
| MTOR      | -0.0178018 | 2.543E-07 |
| MRFAP1L1  | -0.0420416 | 2.56E-07  |
| RXRA      | -0.051438  | 2.569E-07 |
| MOSPD2    | -0.072574  | 2.572E-07 |
| TNFAIP8   | -0.2897536 | 2.587E-07 |
| LINC-PINT | 0.1828828  | 2.589E-07 |
| LSM1      | 0.0811247  | 2.611E-07 |
| SERTAD2   | 0.1207597  | 2.64E-07  |
| SNX19     | -0.0234768 | 2.657E-07 |
| GTF2I     | -0.21472   | 2.725E-07 |
| COPS5     | -0.0380966 | 2.732E-07 |
| NFAT5     | -0.0686195 | 2.741E-07 |
| CABIN1    | -0.1570935 | 2.743E-07 |
| ARHGEF2   | -0.0512915 | 2.785E-07 |
| TATDN3    | -0.0061967 | 2.797E-07 |
| ABHD2     | -0.1934634 | 2.805E-07 |
| ADGRE5    | 0.1840608  | 2.856E-07 |
| CEP95     | -0.0733556 | 2.874E-07 |
| TMEM189   | -0.0281625 | 2.883E-07 |
| MAD2L2    | 0.0956885  | 2.922E-07 |
| STMN1     | 0.0502528  | 2.925E-07 |
| HYPK      | -0.0546143 | 2.929E-07 |

|            |            |           |
|------------|------------|-----------|
| PDHB       | -0.0295156 | 2.933E-07 |
| UBE2J2     | 0.0199635  | 2.946E-07 |
| ERVK3-1    | -0.037827  | 2.948E-07 |
| NOMO1      | -0.0724449 | 2.97E-07  |
| CXCR4      | -0.1585818 | 2.974E-07 |
| SNU13      | 0.2139033  | 2.982E-07 |
| CDC42SE2   | -0.1031027 | 2.987E-07 |
| MID1IP1    | -0.0517875 | 3.029E-07 |
| LTN1       | -0.0657265 | 3.032E-07 |
| DDX56      | 0.0281066  | 3.045E-07 |
| TNFSF12    | -0.0747116 | 3.057E-07 |
| CYB5R4     | -0.1296047 | 3.091E-07 |
| HTATSF1    | 0.0585453  | 3.113E-07 |
| RFC4       | 0.0116255  | 3.122E-07 |
| FKBP8      | 0.0606184  | 3.136E-07 |
| PRKAG1     | -0.0196675 | 3.139E-07 |
| CDK11B     | -0.0856275 | 3.209E-07 |
| DCPS       | 0.0302188  | 3.218E-07 |
| SMIM24     | -0.3152242 | 3.241E-07 |
| CSF2RB     | -0.3617779 | 3.265E-07 |
| ICAM2      | 0.1166236  | 3.301E-07 |
| NUDC       | 0.1091142  | 3.334E-07 |
| CALM3      | 0.1081131  | 3.347E-07 |
| HK1        | 0.0687501  | 3.375E-07 |
| COQ8A      | -0.0317264 | 3.425E-07 |
| AC006480.2 | -0.0869612 | 3.428E-07 |
| B4GALT1    | -0.0536929 | 3.431E-07 |
| UBA1       | -0.0518902 | 3.463E-07 |
| MYPOP      | -0.0384613 | 3.486E-07 |
| PIKFYVE    | -0.1404267 | 3.497E-07 |
| ACADS      | 0.0422514  | 3.504E-07 |
| METAP1     | -0.0547646 | 3.531E-07 |
| CEPT1      | -0.0317551 | 3.55E-07  |
| THEMIS2    | 0.0917307  | 3.58E-07  |
| IRAK3      | -0.1902257 | 3.593E-07 |
| DPM2       | 0.0214201  | 3.625E-07 |
| NT5C       | 0.1056397  | 3.665E-07 |
| MED30      | 0.0120313  | 3.704E-07 |
| ISCA2      | -0.018519  | 3.75E-07  |
| LMAN2      | 0.0765169  | 3.757E-07 |
| TECR       | 0.0560374  | 3.775E-07 |
| SETD2      | -0.0803533 | 3.776E-07 |
| LIMD2      | -0.2215527 | 3.803E-07 |
| RENBP      | -0.0748856 | 3.893E-07 |
| HLA-DRA    | 0.3094525  | 3.899E-07 |
| CIZ1       | -0.0981919 | 3.918E-07 |
| MYSM1      | -0.0993148 | 3.921E-07 |
| SYK        | 0.0586072  | 3.973E-07 |
| ZNF600     | -0.0754331 | 4.069E-07 |
| OPRL1      | -0.0278    | 4.092E-07 |

|           |            |           |
|-----------|------------|-----------|
| DLGAP1-AS | 0.1483398  | 4.103E-07 |
| FBXL20    | -0.1374638 | 4.109E-07 |
| NUP43     | -0.058982  | 4.14E-07  |
| C20orf27  | 0.1199905  | 4.15E-07  |
| RHOT1     | -0.0906618 | 4.182E-07 |
| POLD2     | 0.0529681  | 4.211E-07 |
| ARPC4     | -0.0500775 | 4.255E-07 |
| TMEM91    | 0.0707099  | 4.26E-07  |
| LMF2      | 0.0154761  | 4.412E-07 |
| RPS18     | 0.1566307  | 4.422E-07 |
| MAPKAPK2  | -0.078264  | 4.422E-07 |
| HSPA5     | 0.136402   | 4.433E-07 |
| ZNF207    | -0.1883804 | 4.443E-07 |
| CYTH3     | -0.0461055 | 4.473E-07 |
| TMEM161B  | -0.2309644 | 4.491E-07 |
| MRPS35    | 0.0127508  | 4.603E-07 |
| ZNF431    | -0.2793863 | 4.611E-07 |
| TDRD3     | -0.0368956 | 4.616E-07 |
| API5      | -0.0369823 | 4.675E-07 |
| TIMM23    | -0.0116043 | 4.683E-07 |
| NOTCH2    | -0.1141756 | 4.692E-07 |
| POLE3     | -0.1028351 | 4.729E-07 |
| SERINC5   | -0.1540734 | 4.761E-07 |
| PHC2      | -0.0188425 | 4.773E-07 |
| SLC25A16  | -0.0487159 | 4.815E-07 |
| CCZ1B     | -0.0784371 | 4.816E-07 |
| CACNA2D4  | -0.0192142 | 4.843E-07 |
| SYNGR2    | -0.152098  | 4.853E-07 |
| NSL1      | -0.0073361 | 4.882E-07 |
| COMMD2    | -0.0163772 | 4.885E-07 |
| FAAP20    | 0.1312392  | 4.898E-07 |
| CSNK1G3   | 0.0023889  | 4.9E-07   |
| ARL5A     | -0.0712772 | 4.931E-07 |
| THUMPD3-A | -0.1652835 | 4.946E-07 |
| GORASP2   | -0.0235561 | 4.948E-07 |
| CKS1B     | 0.1083075  | 4.964E-07 |
| LRG1      | -0.0823239 | 4.967E-07 |
| B3GALNT2  | -0.068868  | 4.971E-07 |
| HACD3     | 0.1026867  | 5.005E-07 |
| TAP1      | 0.0328244  | 5.089E-07 |
| TMUB2     | -0.0008233 | 5.109E-07 |
| GPR27     | -0.1486596 | 5.123E-07 |
| DAZAP1    | -0.105737  | 5.132E-07 |
| CCT2      | 0.1476175  | 5.133E-07 |
| GSTP1     | 0.2061933  | 5.144E-07 |
| KPNA3     | -0.102984  | 5.145E-07 |
| NRBP1     | -0.0518778 | 5.249E-07 |
| SNRNP27   | -0.0833262 | 5.329E-07 |
| BLCAP     | 0.0170792  | 5.357E-07 |
| NBPF12    | -0.0598532 | 5.36E-07  |

|            |            |           |
|------------|------------|-----------|
| RPS19BP1   | 0.0629224  | 5.368E-07 |
| MEMO1      | -0.09985   | 5.381E-07 |
| ADAM15     | 0.0914904  | 5.402E-07 |
| COQ4       | 0.0025189  | 5.483E-07 |
| ZDHHC4     | -0.0024711 | 5.511E-07 |
| ELK3       | -0.1838459 | 5.55E-07  |
| LPCAT4     | -0.031961  | 5.566E-07 |
| ZNF384     | -0.0584529 | 5.577E-07 |
| RGS19      | -0.1520002 | 5.578E-07 |
| WNK1       | -0.0472411 | 5.59E-07  |
| SRP68      | -0.028001  | 5.59E-07  |
| ANAPC13    | -0.0081567 | 5.606E-07 |
| PLD3       | 0.0085478  | 5.736E-07 |
| DCK        | 0.1409417  | 5.778E-07 |
| DUSP14     | 0.0113992  | 5.846E-07 |
| CNTROB     | -0.0352951 | 5.864E-07 |
| MAGOH      | -0.0731699 | 5.881E-07 |
| LPCAT3     | 0.0801349  | 5.885E-07 |
| PYM1       | 0.0711241  | 5.941E-07 |
| NELFB      | -0.0188877 | 5.946E-07 |
| STX5       | 0.029489   | 5.952E-07 |
| TBC1D20    | -0.048695  | 5.983E-07 |
| NSUN5      | -0.0889609 | 6.01E-07  |
| VTI1A      | -0.0387112 | 6.022E-07 |
| TYK2       | -0.0569294 | 6.136E-07 |
| AP002748.4 | -0.0319796 | 6.218E-07 |
| BRAP       | -0.0555825 | 6.236E-07 |
| LRRC26     | 0.1530006  | 6.239E-07 |
| PRKCB      | 0.1422275  | 6.277E-07 |
| ZBTB4      | -0.0604926 | 6.313E-07 |
| ADIPOR1    | 0.000584   | 6.35E-07  |
| MGAT4A     | -0.0696086 | 6.414E-07 |
| TMEM9B     | 0.0282207  | 6.533E-07 |
| TUBE1      | -0.0269674 | 6.555E-07 |
| AUP1       | 0.0654995  | 6.557E-07 |
| KANTR      | -0.0466685 | 6.566E-07 |
| MYADM      | -0.0728614 | 6.571E-07 |
| TPD52L2    | -0.012224  | 6.625E-07 |
| MRPL4      | 0.1267496  | 6.668E-07 |
| SAFB       | -0.0755979 | 6.676E-07 |
| DCUN1D1    | -0.0879583 | 6.704E-07 |
| ERAP2      | -0.0729947 | 6.717E-07 |
| DLST       | -0.0225678 | 6.739E-07 |
| SUMO1      | 0.0561388  | 6.757E-07 |
| BAIAP2-DT  | -0.0170874 | 6.802E-07 |
| SLC25A38   | -0.058635  | 6.852E-07 |
| RPRD1A     | -0.077244  | 6.862E-07 |
| PSMB8      | 0.2377193  | 6.894E-07 |
| TCF12      | 0.033416   | 6.901E-07 |
| LTV1       | -0.0210872 | 6.971E-07 |

|           |            |           |
|-----------|------------|-----------|
| MLLT6     | -0.0324639 | 7.042E-07 |
| UBR2      | -0.0350067 | 7.087E-07 |
| ACO2      | -0.0167047 | 7.136E-07 |
| SNRNP25   | 0.0448381  | 7.145E-07 |
| THAP9-AS1 | -0.0581057 | 7.159E-07 |
| PPP3R1    | -0.0978414 | 7.24E-07  |
| ATAD3C    | -0.0406308 | 7.272E-07 |
| LCP2      | 0.1097891  | 7.317E-07 |
| PATL1     | -0.0087761 | 7.329E-07 |
| TRIM11    | 0.0056399  | 7.344E-07 |
| GMPS      | 0.0964425  | 7.363E-07 |
| NSF       | -0.0351358 | 7.409E-07 |
| RNF113A   | 0.0343694  | 7.457E-07 |
| SSBP3     | -0.0984101 | 7.502E-07 |
| UMPS      | 0.0338111  | 7.508E-07 |
| GTPBP6    | 0.0423322  | 7.559E-07 |
| MRPL39    | 0.0024543  | 7.634E-07 |
| SDHA      | -0.0747589 | 7.642E-07 |
| GLIPR2    | 0.1193838  | 7.655E-07 |
| NUP50     | -0.0951742 | 7.751E-07 |
| PIGK      | 0.0230466  | 7.789E-07 |
| VPS26C    | 0.0740305  | 7.815E-07 |
| VPS51     | 0.0573925  | 7.907E-07 |
| PIN4      | -0.0527142 | 7.925E-07 |
| KIAA1109  | -0.1075452 | 8.004E-07 |
| OCEL1     | -0.0172405 | 8.024E-07 |
| HPS6      | -0.0105468 | 8.033E-07 |
| ALDH6A1   | -0.0457441 | 8.046E-07 |
| SEC14L1   | 0.0568015  | 8.046E-07 |
| VPS45     | -0.0560211 | 8.065E-07 |
| ALKBH5    | -0.0326938 | 8.131E-07 |
| SEC61A1   | 0.007694   | 8.239E-07 |
| MFN1      | -0.0448026 | 8.263E-07 |
| TOR1AIP2  | -0.0375617 | 8.291E-07 |
| ATP13A2   | -0.073594  | 8.354E-07 |
| CSNK1D    | -0.0554158 | 8.399E-07 |
| WDR70     | -0.1234665 | 8.447E-07 |
| PRRG4     | -0.1683063 | 8.513E-07 |
| SLC25A39  | 0.0281406  | 8.595E-07 |
| SUSD6     | -0.0387538 | 8.779E-07 |
| FLOT1     | -0.1419002 | 8.899E-07 |
| CDK7      | -0.0559    | 8.957E-07 |
| TST       | -0.0306013 | 8.959E-07 |
| SWAP70    | -0.2097583 | 8.985E-07 |
| IRAK4     | -0.0904672 | 9.012E-07 |
| SH3TC1    | 0.0110512  | 9.024E-07 |
| VKORC1    | 0.1392761  | 9.067E-07 |
| RASGRP2   | -0.1125062 | 9.197E-07 |
| CETN3     | -0.0498573 | 9.235E-07 |
| MYO15B    | -0.0123348 | 9.34E-07  |

|            |            |           |
|------------|------------|-----------|
| MTCH1      | 0.0175141  | 9.383E-07 |
| AC099518.5 | -0.0493337 | 9.567E-07 |
| PMVK       | 0.0446733  | 9.628E-07 |
| VPS25      | 0.0556628  | 9.64E-07  |
| GATA2      | -0.4387877 | 9.679E-07 |
| RAB2B      | -0.0010215 | 9.685E-07 |
| MTMR3      | -0.0965232 | 9.704E-07 |
| PSMD2      | 0.0095332  | 9.705E-07 |
| NME1       | 0.2104088  | 9.716E-07 |
| AC091607.2 | -0.0817612 | 9.72E-07  |
| MIEF1      | -0.0282395 | 9.806E-07 |
| PADI2      | -0.0560183 | 9.833E-07 |
| XPNPEP3    | -0.037467  | 9.835E-07 |
| NSMAF      | -0.0871807 | 9.888E-07 |
| ACTR1A     | -0.0307119 | 9.902E-07 |
| NFKBIE     | -0.0566401 | 9.909E-07 |
| GNG7       | -0.0267251 | 9.95E-07  |
| HIST1H2AC  | -0.1957629 | 1.001E-06 |
| RO60       | -0.0696856 | 1.004E-06 |
| SNX17      | 0.071189   | 1.005E-06 |
| ZNF260     | -0.0351879 | 1.009E-06 |
| TMEM33     | -0.0715114 | 1.019E-06 |
| UVRAG      | 0.025949   | 1.049E-06 |
| PSMD14     | 0.009466   | 1.054E-06 |
| TM2D3      | 0.0206234  | 1.066E-06 |
| TMBIM1     | -0.1252383 | 1.067E-06 |
| PSEN1      | -0.1159492 | 1.071E-06 |
| LINC01410  | -0.0429411 | 1.073E-06 |
| GLB1       | -0.0527358 | 1.089E-06 |
| CAB39      | -0.0493733 | 1.091E-06 |
| SAR1A      | -0.0439435 | 1.094E-06 |
| HDAC9      | 0.0918416  | 1.094E-06 |
| CSNK1G2    | -0.0706072 | 1.096E-06 |
| CHST14     | -0.0241429 | 1.098E-06 |
| GOLPH3     | 0.0657256  | 1.103E-06 |
| AC005332.6 | -0.062158  | 1.106E-06 |
| MBTPS2     | -0.0042585 | 1.113E-06 |
| UBE2Q2     | -0.1286588 | 1.115E-06 |
| MRPL33     | -0.244708  | 1.117E-06 |
| TOR1A      | -0.0915482 | 1.122E-06 |
| KDM1A      | 0.0045189  | 1.123E-06 |
| INO80D     | -0.113491  | 1.126E-06 |
| CBX4       | 0.0215202  | 1.128E-06 |
| SYF2       | -0.2016889 | 1.13E-06  |
| MRPL9      | 0.0561121  | 1.138E-06 |
| NOC4L      | 0.0194744  | 1.147E-06 |
| RMDN3      | -0.0185573 | 1.162E-06 |
| HIGD1A     | -0.017906  | 1.175E-06 |
| LINC02035  | -0.0297828 | 1.176E-06 |
| TSFM       | 0.016932   | 1.185E-06 |



|            |            |           |
|------------|------------|-----------|
| ARFGAP2    | 0.0442786  | 1.195E-06 |
| CCT6A      | 0.1094218  | 1.2E-06   |
| APTX       | -0.0400755 | 1.222E-06 |
| IGFLR1     | -0.0751766 | 1.226E-06 |
| ETFB       | 0.1688663  | 1.227E-06 |
| TOMM70     | 0.0219548  | 1.231E-06 |
| ZNF524     | -0.0101949 | 1.235E-06 |
| ZNF84      | -0.0839336 | 1.237E-06 |
| AC009950.1 | -0.0316834 | 1.252E-06 |
| ARF4       | -0.1299099 | 1.254E-06 |
| AFMID      | -0.0849771 | 1.255E-06 |
| FN1        | 0.107967   | 1.258E-06 |
| LINC01089  | -0.0470961 | 1.262E-06 |
| UHRF2      | -0.0296163 | 1.263E-06 |
| AL592183.1 | -0.1123065 | 1.267E-06 |
| MAPKAPK5   | -0.0123317 | 1.271E-06 |
| SCAMP3     | -0.0212472 | 1.287E-06 |
| MPC2       | 0.105206   | 1.291E-06 |
| UTP11      | -0.0741706 | 1.295E-06 |
| SLC35E2B   | -0.0938962 | 1.298E-06 |
| BCL7C      | 0.0688798  | 1.305E-06 |
| ALKBH3     | 0.0050825  | 1.311E-06 |
| CYLD       | -0.1255801 | 1.313E-06 |
| MCEE       | -0.0265516 | 1.316E-06 |
| PPP4R1     | -0.0435932 | 1.318E-06 |
| PSMB9      | 0.1628379  | 1.321E-06 |
| PDLIM1     | 0.232029   | 1.324E-06 |
| KIAA2026   | -0.1111938 | 1.326E-06 |
| AC103769.1 | -0.0416938 | 1.334E-06 |
| RBCK1      | 0.0909387  | 1.339E-06 |
| ITGAL      | 0.2281817  | 1.367E-06 |
| ALG8       | 0.0095889  | 1.37E-06  |
| KDM4A      | -0.1842116 | 1.373E-06 |
| SYMPK      | 0.004828   | 1.378E-06 |
| ZNF322     | -0.0375866 | 1.379E-06 |
| CFL2       | -0.0777384 | 1.389E-06 |
| MRPL54     | 0.0948745  | 1.395E-06 |
| DBNL       | -0.0535309 | 1.429E-06 |
| STX10      | 0.0841048  | 1.429E-06 |
| RTN4R      | 0.0697439  | 1.433E-06 |
| TMEM97     | 0.0172324  | 1.434E-06 |
| PPP1R35    | 0.0022915  | 1.446E-06 |
| MRPS26     | 0.0594201  | 1.458E-06 |
| AZU1       | -0.5717209 | 1.483E-06 |
| C1GALT1    | 0.0303372  | 1.484E-06 |
| BCL7B      | -0.0341882 | 1.488E-06 |
| BCL2L13    | -0.0568646 | 1.489E-06 |
| FAM102B    | -0.0691367 | 1.498E-06 |
| TFG        | -0.0156763 | 1.504E-06 |
| MED12      | -0.0198198 | 1.507E-06 |

|          |            |           |
|----------|------------|-----------|
| OSTF1    | -0.0695124 | 1.508E-06 |
| MRPL47   | 0.0038865  | 1.514E-06 |
| XAB2     | -0.0301036 | 1.514E-06 |
| PRPS2    | -0.0034981 | 1.516E-06 |
| ARHGEF40 | -0.1022121 | 1.529E-06 |
| YAF2     | -0.0918388 | 1.532E-06 |
| CSNK2A2  | -0.0389209 | 1.536E-06 |
| LENG1    | 0.0308026  | 1.538E-06 |
| MEX3C    | 0.039537   | 1.553E-06 |
| DDA1     | 0.0213275  | 1.558E-06 |
| JOSD1    | -0.0175636 | 1.575E-06 |
| SNCA     | 0.0583107  | 1.578E-06 |
| RBM4     | 0.0318624  | 1.58E-06  |
| WBP2     | -0.0549668 | 1.595E-06 |
| RNF145   | -0.0752171 | 1.612E-06 |
| RBM18    | -0.0217983 | 1.622E-06 |
| SDHC     | -0.1420607 | 1.64E-06  |
| JPX      | -0.213248  | 1.645E-06 |
| TMEM144  | 0.0142098  | 1.648E-06 |
| GRSF1    | 0.0710447  | 1.652E-06 |
| ZNF701   | -0.0297579 | 1.665E-06 |
| UQCC3    | 0.0299967  | 1.666E-06 |
| EMD      | 0.0265642  | 1.668E-06 |
| RBBP8    | 0.0046952  | 1.674E-06 |
| ARHGAP18 | 0.1721063  | 1.689E-06 |
| ZC3HC1   | -0.0072127 | 1.705E-06 |
| MKNK1    | -0.023101  | 1.713E-06 |
| PRRC2B   | -0.0983661 | 1.718E-06 |
| BLOC1S2  | -0.0059342 | 1.719E-06 |
| TMEM199  | -0.0280278 | 1.729E-06 |
| LYRM1    | 0.1523212  | 1.735E-06 |
| PRRC1    | -0.0632839 | 1.742E-06 |
| SLC39A11 | -0.0808387 | 1.744E-06 |
| SLC35A1  | -0.0822853 | 1.751E-06 |
| ZNF224   | 0.0001238  | 1.751E-06 |
| GPS1     | 0.0062428  | 1.752E-06 |
| CZIB     | 0.0219544  | 1.757E-06 |
| VMAC     | 0.0068621  | 1.783E-06 |
| AGL      | -0.0888336 | 1.783E-06 |
| SARS     | -0.0343564 | 1.81E-06  |
| ORC3     | -0.0006098 | 1.82E-06  |
| MCRIP2   | 0.0669586  | 1.829E-06 |
| CIAO2B   | 0.0779931  | 1.83E-06  |
| LINS1    | -0.0482315 | 1.837E-06 |
| RAD23B   | -0.0587333 | 1.849E-06 |
| SUPT7L   | 0.0277179  | 1.88E-06  |
| ATMIN    | -0.0647341 | 1.893E-06 |
| COX19    | -0.0044901 | 1.897E-06 |
| C6orf89  | -0.0055481 | 1.904E-06 |
| SURF6    | -0.0787368 | 1.905E-06 |

|           |            |           |
|-----------|------------|-----------|
| COMMD1    | -0.0443502 | 1.906E-06 |
| KMT2C     | -0.1051714 | 1.912E-06 |
| SLC6A6    | -0.1300918 | 1.932E-06 |
| EDEM1     | -0.0540873 | 1.941E-06 |
| COA3      | 0.0320635  | 1.949E-06 |
| SENP5     | -0.0473812 | 1.95E-06  |
| HELB      | -0.0972549 | 1.954E-06 |
| SLC2A4RG  | -0.0070181 | 1.954E-06 |
| NDUFAB1   | 0.1026105  | 1.959E-06 |
| GPR35     | -0.1321029 | 1.995E-06 |
| CLK3      | -0.0529089 | 1.997E-06 |
| CNIH1     | -0.1018955 | 2.002E-06 |
| NELFCD    | -0.0412647 | 2.005E-06 |
| LPXN      | -0.1803372 | 2.007E-06 |
| UGP2      | 0.1404367  | 2.013E-06 |
| YIF1A     | 0.0768526  | 2.059E-06 |
| LRRC59    | 0.0559709  | 2.075E-06 |
| LRRC28    | -0.0346449 | 2.078E-06 |
| MYLPF     | -0.1435587 | 2.085E-06 |
| LRRC47    | -0.0286127 | 2.109E-06 |
| TRAK2     | 0.1389893  | 2.119E-06 |
| CDC26     | 0.0636686  | 2.123E-06 |
| MRPL28    | 0.0119907  | 2.126E-06 |
| DCAF6     | -0.0187605 | 2.136E-06 |
| LZTS2     | 0.0305343  | 2.138E-06 |
| SF3B3     | 0.0157445  | 2.14E-06  |
| ADPRHL2   | 0.0058727  | 2.147E-06 |
| TXNDC9    | 0.0331377  | 2.158E-06 |
| HSP90AA1  | 0.2434898  | 2.161E-06 |
| SNX15     | -0.0536909 | 2.193E-06 |
| TRIM65    | -0.0222889 | 2.196E-06 |
| EMID1     | -0.0232602 | 2.198E-06 |
| ESYT2     | -0.0141028 | 2.216E-06 |
| RNF141    | 0.0175779  | 2.245E-06 |
| ABCA7     | -0.0265613 | 2.264E-06 |
| PTPN1     | 0.1009642  | 2.284E-06 |
| TAF4      | -0.0041007 | 2.295E-06 |
| NMD3      | 0.0032277  | 2.317E-06 |
| CSKMT     | -0.1525926 | 2.32E-06  |
| CLEC2D    | -0.0686343 | 2.325E-06 |
| NUP54     | -0.0031998 | 2.339E-06 |
| PTOV1     | -0.0363212 | 2.365E-06 |
| DELE1     | -0.0510734 | 2.395E-06 |
| PGRMC1    | 0.0018199  | 2.404E-06 |
| CPSF3     | -0.0092007 | 2.408E-06 |
| ALOX12-AS | -0.053929  | 2.416E-06 |
| LEMD3     | 0.0184587  | 2.436E-06 |
| PPP1R12B  | -0.0938919 | 2.438E-06 |
| TIMM44    | -0.0157767 | 2.442E-06 |
| PARP10    | -0.0308275 | 2.449E-06 |

|            |            |           |
|------------|------------|-----------|
| RNF10      | -0.1193101 | 2.455E-06 |
| CTSB       | -0.1197079 | 2.458E-06 |
| LYPLA2     | 0.0214719  | 2.47E-06  |
| CDC123     | 0.0289083  | 2.497E-06 |
| HSD17B4    | -0.2252442 | 2.504E-06 |
| MRPS16     | 0.0966913  | 2.511E-06 |
| PECAM1     | -0.0348874 | 2.525E-06 |
| CYTOR      | 0.235999   | 2.532E-06 |
| PIP4P2     | 0.1189306  | 2.544E-06 |
| WDSUB1     | -0.0868613 | 2.546E-06 |
| DENND5A    | -0.052395  | 2.55E-06  |
| KIAA2013   | -0.0331998 | 2.567E-06 |
| SMN2       | -0.0346699 | 2.568E-06 |
| ZSCAN18    | 0.016478   | 2.603E-06 |
| PSMG1      | 0.0622639  | 2.612E-06 |
| USP7       | -0.0019714 | 2.623E-06 |
| TMEM273    | 0.1383998  | 2.641E-06 |
| AL161457.2 | -0.0537224 | 2.643E-06 |
| PLEKHM1    | 0.0091864  | 2.643E-06 |
| HTT        | -0.1302892 | 2.645E-06 |
| RAB11B     | -0.0606378 | 2.645E-06 |
| GIT1       | -0.0167954 | 2.649E-06 |
| MRPL41     | 0.0899598  | 2.656E-06 |
| TYMS       | 0.258484   | 2.657E-06 |
| PPP1R9B    | -0.0230007 | 2.663E-06 |
| TCTN3      | -0.0183734 | 2.666E-06 |
| MPPE1      | -0.0949514 | 2.673E-06 |
| NAAA       | 0.0949926  | 2.674E-06 |
| VPS37A     | -0.0584236 | 2.678E-06 |
| SNHG29     | -0.1854293 | 2.682E-06 |
| RIDA       | 0.016417   | 2.703E-06 |
| PTBP1      | -0.0750909 | 2.714E-06 |
| SLC66A3    | -0.0024719 | 2.719E-06 |
| AAK1       | -0.2109717 | 2.74E-06  |
| ANKRD40    | -0.0044118 | 2.778E-06 |
| BABAM2     | 0.0106822  | 2.813E-06 |
| N4BP2L2    | -0.1971864 | 2.815E-06 |
| NLRP2      | 0.0080272  | 2.875E-06 |
| STIM2      | -0.0169856 | 2.881E-06 |
| MICU1      | 0.0019067  | 2.882E-06 |
| CREBBP     | -0.0279425 | 2.888E-06 |
| PPIL3      | -0.0094776 | 2.893E-06 |
| AZI2       | -0.0985825 | 2.9E-06   |
| MED13L     | -0.22078   | 2.922E-06 |
| ABI1       | -0.0665535 | 3.009E-06 |
| EFCAB2     | 0.0794612  | 3.009E-06 |
| AC003681.1 | -0.0549486 | 3.014E-06 |
| NCALD      | -0.0366504 | 3.034E-06 |
| RNF181     | -0.0073221 | 3.055E-06 |
| NUDCD2     | -0.0098249 | 3.071E-06 |

|           |            |           |
|-----------|------------|-----------|
| RNF11     | -0.0425624 | 3.086E-06 |
| PIGF      | 0.0437193  | 3.094E-06 |
| SLC25A33  | -0.0134615 | 3.096E-06 |
| C11orf98  | -0.0442506 | 3.098E-06 |
| PRR7      | 0.0751249  | 3.1E-06   |
| SOAT1     | -0.1138868 | 3.114E-06 |
| TMEM107   | 0.1520079  | 3.158E-06 |
| MSRB1     | 0.0252324  | 3.179E-06 |
| TCEA2     | 0.1177982  | 3.225E-06 |
| NUMB      | -0.0510907 | 3.237E-06 |
| STAT6     | -0.1016649 | 3.249E-06 |
| TRIAP1    | 0.0322641  | 3.277E-06 |
| MMP24OS   | -0.0954163 | 3.303E-06 |
| AGK       | -0.0235666 | 3.311E-06 |
| PNPLA4    | 0.0295554  | 3.326E-06 |
| KCNMB3    | -0.0348864 | 3.339E-06 |
| PACS1     | -0.0256688 | 3.344E-06 |
| GALNT1    | -0.1357016 | 3.353E-06 |
| POLDIP2   | 0.0062671  | 3.354E-06 |
| EFTUD2    | -0.0052525 | 3.375E-06 |
| NOM1      | -0.0110719 | 3.376E-06 |
| ZNF888    | -0.029689  | 3.396E-06 |
| EIF4E2    | -0.0127009 | 3.413E-06 |
| SLC25A43  | -0.0115788 | 3.425E-06 |
| TMEM80    | -0.0184835 | 3.45E-06  |
| GRAMD4    | -0.1022268 | 3.451E-06 |
| PIM2      | 0.1556415  | 3.464E-06 |
| DNAJA2    | -0.0495247 | 3.486E-06 |
| ZNF587    | -0.0657612 | 3.487E-06 |
| RAB9A     | -0.1638212 | 3.49E-06  |
| NIPSNAP3A | -0.092457  | 3.491E-06 |
| LAPTM4A   | -0.1176945 | 3.492E-06 |
| ZNF514    | -0.0107656 | 3.507E-06 |
| BSPRY     | 0.1634455  | 3.511E-06 |
| NSUN2     | 0.0038535  | 3.52E-06  |
| DMAC1     | 0.0672911  | 3.564E-06 |
| DLD       | -0.0129247 | 3.574E-06 |
| PYCARD    | 0.2032047  | 3.612E-06 |
| EDC4      | -0.0079807 | 3.621E-06 |
| FUOM      | 0.1086322  | 3.622E-06 |
| PSMD12    | 0.0241078  | 3.641E-06 |
| HSD17B7   | -0.072162  | 3.647E-06 |
| DNAJC24   | -0.068465  | 3.652E-06 |
| GET3      | 0.0151238  | 3.673E-06 |
| RPS24     | -0.123491  | 3.673E-06 |
| OPA3      | -0.0203796 | 3.739E-06 |
| CCDC66    | -0.0493814 | 3.745E-06 |
| TIMM17A   | 0.012865   | 3.803E-06 |
| ACADVL    | 0.0447367  | 3.811E-06 |
| ZDHHC21   | -0.108711  | 3.839E-06 |

|            |            |           |
|------------|------------|-----------|
| POGZ       | -0.079364  | 3.845E-06 |
| NAA25      | -0.0002828 | 3.846E-06 |
| HK2        | -0.0410923 | 3.85E-06  |
| HIST1H4E   | -0.0634502 | 3.873E-06 |
| PHYKPL     | 0.0534679  | 3.908E-06 |
| MAP4K3     | -0.0039655 | 3.946E-06 |
| PXMP2      | 0.0337002  | 3.958E-06 |
| HOXA7      | 0.0555426  | 3.959E-06 |
| POLD4      | -0.1005328 | 3.963E-06 |
| C1orf50    | 0.0138989  | 3.974E-06 |
| MLLT1      | -0.1385426 | 3.988E-06 |
| DIP2A      | -0.0049714 | 4.002E-06 |
| RILP       | 0.0772639  | 4.033E-06 |
| AC005261.1 | -0.0986034 | 4.056E-06 |
| ZNF350     | -0.0345077 | 4.062E-06 |
| YTHDF1     | -0.0287838 | 4.086E-06 |
| WDR36      | -0.0179801 | 4.095E-06 |
| TSEN34     | 0.1489107  | 4.106E-06 |
| DGKD       | 0.0904243  | 4.109E-06 |
| GPN3       | 0.129248   | 4.11E-06  |
| CCDC28A    | -0.0580265 | 4.147E-06 |
| TXNDC17    | 0.1045905  | 4.182E-06 |
| RANBP6     | -0.026369  | 4.194E-06 |
| FAM149B1   | -0.0027638 | 4.198E-06 |
| TTC7A      | -0.0425218 | 4.207E-06 |
| CCNDBP1    | -0.084455  | 4.213E-06 |
| CDK13      | -0.1311079 | 4.219E-06 |
| GCA        | 0.0347851  | 4.219E-06 |
| POM121     | -0.0538497 | 4.23E-06  |
| DENND10    | 0.0188968  | 4.24E-06  |
| MBD4       | -0.1598399 | 4.27E-06  |
| RFX8       | -0.0654928 | 4.285E-06 |
| UAP1       | 0.0010554  | 4.305E-06 |
| FBXO28     | -0.0116669 | 4.308E-06 |
| ZCCHC17    | 0.0470448  | 4.309E-06 |
| FAM216A    | 0.1251488  | 4.323E-06 |
| ZZEF1      | -0.0500161 | 4.336E-06 |
| MCUR1      | -0.0231824 | 4.355E-06 |
| DDIT3      | -0.0857645 | 4.379E-06 |
| TRA2A      | -0.1498125 | 4.388E-06 |
| SLC35F5    | -0.0935822 | 4.4E-06   |
| NAA30      | -0.0224299 | 4.416E-06 |
| NFX1       | 0.0523753  | 4.438E-06 |
| SLC30A5    | -0.0287637 | 4.439E-06 |
| BANF1      | 0.1261672  | 4.441E-06 |
| RBM10      | 0.0134883  | 4.448E-06 |
| ZNF124     | -0.0439815 | 4.455E-06 |
| LCMT1      | 0.0046702  | 4.463E-06 |
| SPN        | -0.239577  | 4.471E-06 |
| C11orf71   | -0.0124625 | 4.498E-06 |

|            |            |           |
|------------|------------|-----------|
| TBRG4      | 0.0451677  | 4.517E-06 |
| ATF2       | -0.0539593 | 4.529E-06 |
| NFKBIZ     | 0.2084673  | 4.538E-06 |
| ITFG2      | -0.0358033 | 4.541E-06 |
| NDUFB10    | 0.1200207  | 4.545E-06 |
| PSMD9      | 0.0470574  | 4.598E-06 |
| AGO2       | 0.0059896  | 4.632E-06 |
| SPIN4      | -0.1819046 | 4.633E-06 |
| C6orf62    | -0.1774941 | 4.646E-06 |
| MON1B      | -0.0557105 | 4.664E-06 |
| NRAS       | -0.0486732 | 4.714E-06 |
| GRAMD1A    | 0.0851441  | 4.759E-06 |
| MSL2       | -0.0743542 | 4.795E-06 |
| AC011043.1 | -0.0537894 | 4.801E-06 |
| ANKRD10-IT | -0.1047874 | 4.804E-06 |
| NFATC3     | -0.0468186 | 4.829E-06 |
| SGO2       | -0.0892805 | 4.844E-06 |
| TRAPPC2    | -0.0356588 | 4.845E-06 |
| DDX49      | 0.0460061  | 4.852E-06 |
| COA4       | 0.1165758  | 4.885E-06 |
| FLYWCH2    | 0.0377729  | 4.903E-06 |
| TOMM40     | 0.0838993  | 4.917E-06 |
| MCOLN1     | 0.0226481  | 4.943E-06 |
| PCLAF      | 0.3799391  | 4.943E-06 |
| GCLC       | -0.0841634 | 4.993E-06 |
| INAFM2     | -0.0631877 | 5.01E-06  |
| PARP14     | 0.12386    | 5.019E-06 |
| TSR1       | 0.0668182  | 5.096E-06 |
| PTGES2     | 0.021083   | 5.103E-06 |
| ARL5B      | 0.0090533  | 5.158E-06 |
| TNFRSF25   | 0.0977109  | 5.161E-06 |
| FAM111A    | -0.0660031 | 5.17E-06  |
| GTF2H3     | 0.0156926  | 5.268E-06 |
| TSG101     | -0.0280989 | 5.306E-06 |
| CNOT1      | -0.0722335 | 5.324E-06 |
| PRKCH      | 0.0942805  | 5.369E-06 |
| ZNF506     | -0.130563  | 5.374E-06 |
| DPH7       | 0.0032432  | 5.376E-06 |
| ZKSCAN8    | -0.0564488 | 5.406E-06 |
| BRMS1      | -0.0283736 | 5.442E-06 |
| DNMT1      | -0.0206111 | 5.458E-06 |
| MRPS18B    | 0.0574813  | 5.476E-06 |
| PPP2R2D    | -0.0085818 | 5.494E-06 |
| FGFRL1     | -0.0911354 | 5.552E-06 |
| ZNF875     | -0.0269941 | 5.555E-06 |
| RBPMS      | 0.143091   | 5.581E-06 |
| C9orf78    | -0.0887089 | 5.585E-06 |
| EIF3B      | 0.0735835  | 5.598E-06 |
| VPS53      | -0.0398702 | 5.614E-06 |
| VPS8       | -0.0265033 | 5.631E-06 |

|            |            |           |
|------------|------------|-----------|
| SRP9       | -0.1065078 | 5.659E-06 |
| NUP160     | -0.0598849 | 5.668E-06 |
| CD37       | 0.2179339  | 5.695E-06 |
| C15orf61   | 0.0361496  | 5.723E-06 |
| AL450998.2 | -0.0332994 | 5.724E-06 |
| RUFY3      | 0.0259096  | 5.77E-06  |
| TSSC4      | 0.0588246  | 5.771E-06 |
| FOXO3      | 0.0415236  | 5.811E-06 |
| SPAG9      | 0.0172211  | 5.821E-06 |
| HIST1H3D   | 0.0292217  | 5.829E-06 |
| SNHG7      | -0.2779194 | 5.845E-06 |
| FCER1G     | 0.182643   | 5.853E-06 |
| UNC119     | 0.0026775  | 5.887E-06 |
| UNG        | 0.0861025  | 5.974E-06 |
| AC093673.1 | 0.0128773  | 6.005E-06 |
| DDX41      | -0.02663   | 6.019E-06 |
| ADI1       | -0.1651105 | 6.061E-06 |
| AKT1       | 0.0678473  | 6.075E-06 |
| NUDT4      | -0.1036887 | 6.106E-06 |
| KRT8       | 0.0134751  | 6.108E-06 |
| MRPL40     | 0.0901243  | 6.109E-06 |
| ATAD1      | -0.0330499 | 6.183E-06 |
| LINC01268  | -0.187155  | 6.184E-06 |
| ITPR2      | -0.1164934 | 6.252E-06 |
| GUSB       | 0.0677081  | 6.269E-06 |
| SUN2       | -0.1124602 | 6.295E-06 |
| TMEM251    | -0.0550387 | 6.38E-06  |
| QKI        | -0.1787863 | 6.384E-06 |
| TMEM203    | 0.0047613  | 6.39E-06  |
| USP33      | -0.1015957 | 6.407E-06 |
| WDR81      | -0.047645  | 6.418E-06 |
| MRPS11     | -0.0140586 | 6.482E-06 |
| TTL        | -0.045662  | 6.499E-06 |
| AAMP       | 0.0004353  | 6.503E-06 |
| LYST       | -0.2583423 | 6.518E-06 |
| PARG       | -0.0014154 | 6.544E-06 |
| FOXK1      | -0.0510137 | 6.587E-06 |
| NUP210     | -0.0050271 | 6.626E-06 |
| ATP13A3    | -0.0844968 | 6.661E-06 |
| NPDC1      | 0.1722362  | 6.688E-06 |
| GNL3L      | -0.0596781 | 6.695E-06 |
| TM9SF4     | 0.0015383  | 6.716E-06 |
| NSMCE1     | 0.1018941  | 6.797E-06 |
| UNC50      | -0.0037131 | 6.851E-06 |
| TMEM242    | -0.0240672 | 6.858E-06 |
| SLC35A3    | -0.1052819 | 6.892E-06 |
| SUCLG1     | 0.1328917  | 6.938E-06 |
| HBP1       | -0.0762021 | 6.952E-06 |
| RNF126     | 0.0280986  | 6.978E-06 |
| PTPRE      | 0.2622934  | 6.979E-06 |



|           |            |           |
|-----------|------------|-----------|
| FOPNL     | -0.0546663 | 6.987E-06 |
| PAIP1     | -0.0805053 | 6.988E-06 |
| RAN       | 0.2123656  | 6.993E-06 |
| RAB3GAP1  | -0.0076073 | 7.004E-06 |
| LEO1      | 0.0079011  | 7.032E-06 |
| BRI3BP    | -0.1077481 | 7.042E-06 |
| B3GAT3    | 0.0183392  | 7.071E-06 |
| SREBF2    | -0.0994245 | 7.1E-06   |
| GLRX3     | -0.0252884 | 7.103E-06 |
| FMC1      | -0.1063079 | 7.104E-06 |
| MGME1     | 0.0565719  | 7.113E-06 |
| FAH       | -0.0279696 | 7.114E-06 |
| PPM1G     | 0.0910322  | 7.145E-06 |
| DMXL1     | -0.0499565 | 7.147E-06 |
| APRT      | 0.1978284  | 7.156E-06 |
| VPS26A    | 0.0042381  | 7.178E-06 |
| NPIPA1    | -0.060713  | 7.215E-06 |
| VSIG10    | 0.0748959  | 7.239E-06 |
| HDAC7     | 0.068123   | 7.239E-06 |
| TIMM50    | 0.0061268  | 7.24E-06  |
| OXA1L     | 0.0107375  | 7.264E-06 |
| STK25     | 0.0170522  | 7.265E-06 |
| FEN1      | 0.0647962  | 7.283E-06 |
| ANXA6     | 0.1226892  | 7.307E-06 |
| YKT6      | -0.0380004 | 7.312E-06 |
| DUS1L     | 0.0554488  | 7.335E-06 |
| RB1       | -0.0866556 | 7.338E-06 |
| WIZ       | -0.0040672 | 7.347E-06 |
| ZNF548    | -0.0251978 | 7.372E-06 |
| OXLD1     | 0.0908205  | 7.399E-06 |
| DPM3      | -0.1320327 | 7.434E-06 |
| MEA1      | 0.0152878  | 7.443E-06 |
| CDS2      | 0.0159591  | 7.458E-06 |
| DNAJC5    | -0.0215728 | 7.516E-06 |
| ELAC2     | 0.0127683  | 7.522E-06 |
| GLG1      | 0.0039262  | 7.59E-06  |
| MRNIP     | 0.0293867  | 7.615E-06 |
| ARHGAP27  | 0.0956193  | 7.623E-06 |
| TUBGCP5   | -0.007175  | 7.628E-06 |
| CDADC1    | -0.0746882 | 7.63E-06  |
| ETV3      | -0.0479207 | 7.636E-06 |
| FUNDC2    | 0.0048979  | 7.639E-06 |
| CASC4     | 0.0167181  | 7.702E-06 |
| HAT1      | 0.0432939  | 7.716E-06 |
| DHRS7B    | 0.0878311  | 7.747E-06 |
| STRN      | -0.0193987 | 7.762E-06 |
| TMEM161B  | -0.046912  | 7.771E-06 |
| HGS       | -0.0168457 | 7.771E-06 |
| JAK3      | 0.126658   | 7.889E-06 |
| ZFHX2-AS1 | -0.0200927 | 7.894E-06 |

|          |            |           |
|----------|------------|-----------|
| ARHGEF9  | 0.0071018  | 7.949E-06 |
| YPEL3    | -0.1421422 | 8.003E-06 |
| KRR1     | -0.0567296 | 8.014E-06 |
| MYNN     | -0.0162856 | 8.014E-06 |
| ZSCAN29  | -0.0111759 | 8.023E-06 |
| TMEM150A | -0.0279258 | 8.055E-06 |
| KPNA2    | 0.0282091  | 8.071E-06 |
| GTF2IRD2 | -0.0959673 | 8.175E-06 |
| ALYREF   | -0.0222793 | 8.182E-06 |
| GSDMD    | 0.082732   | 8.184E-06 |
| PJA2     | -0.0597372 | 8.202E-06 |
| PPP4R2   | -0.0514086 | 8.218E-06 |
| CYB561D2 | 0.0433079  | 8.304E-06 |
| TPP1     | 0.0827257  | 8.348E-06 |
| SNAPC3   | -0.0610942 | 8.395E-06 |
| TVP23B   | -0.0484301 | 8.4E-06   |
| NQO2     | -0.0403423 | 8.427E-06 |
| IQGAP2   | 0.2227184  | 8.43E-06  |
| PDXDC1   | -0.0800021 | 8.43E-06  |
| MSRA     | 0.0119801  | 8.468E-06 |
| DRAM2    | 0.0363471  | 8.49E-06  |
| RIC8A    | -0.0091554 | 8.528E-06 |
| NFATC2IP | -0.0353663 | 8.543E-06 |
| WBP1     | -0.0085099 | 8.586E-06 |
| PSMB5    | 0.1262196  | 8.598E-06 |
| UBA2     | -0.0009649 | 8.61E-06  |
| PAPSS1   | -0.0311228 | 8.632E-06 |
| NSD2     | -0.0058143 | 8.641E-06 |
| MORC3    | -0.0631    | 8.648E-06 |
| RRAGC    | -0.0314202 | 8.719E-06 |
| TNFSF13B | 0.2222942  | 8.73E-06  |
| ZC3H8    | -0.0617814 | 8.819E-06 |
| AARSD1   | 0.0313997  | 8.845E-06 |
| LMBRD1   | -0.0547722 | 8.899E-06 |
| CDK11A   | -0.0754157 | 8.9E-06   |
| SMARCA4  | -0.0454023 | 8.908E-06 |
| SMCR8    | -0.055745  | 8.918E-06 |
| CNOT8    | -0.09055   | 8.928E-06 |
| RAB18    | -0.0247209 | 8.93E-06  |
| TOX4     | 0.0268758  | 8.975E-06 |
| TEX10    | -0.052411  | 9.051E-06 |
| TRAPPC8  | -0.0008956 | 9.063E-06 |
| RARS2    | -0.0163858 | 9.091E-06 |
| TBC1D2B  | 0.0931695  | 9.112E-06 |
| PIGN     | -0.0453498 | 9.23E-06  |
| ALG6     | -0.0029073 | 9.238E-06 |
| P4HTM    | 0.0860832  | 9.247E-06 |
| SNHG20   | -0.0844675 | 9.291E-06 |
| ZNF410   | -0.0104003 | 9.297E-06 |
| NOL12    | 0.0281311  | 9.36E-06  |

|            |            |           |
|------------|------------|-----------|
| UBALD1     | -0.0192732 | 9.447E-06 |
| TMEM216    | -0.0353089 | 9.453E-06 |
| RNF19A     | -0.0112956 | 9.485E-06 |
| HTRA2      | 0.0290376  | 9.522E-06 |
| STXBP2     | -0.0683284 | 9.576E-06 |
| EEF1AKNM1  | -0.0463843 | 9.582E-06 |
| FAM32A     | -0.0400986 | 9.585E-06 |
| ZDHHC5     | -0.0536707 | 9.594E-06 |
| SNX27      | -0.070861  | 9.596E-06 |
| POP5       | 0.0149002  | 9.647E-06 |
| SETD1B     | -0.0337527 | 9.654E-06 |
| PGP        | 0.0058328  | 9.686E-06 |
| NR2C2      | -0.0481944 | 9.695E-06 |
| TMEM69     | 0.0120708  | 9.76E-06  |
| LHFPL2     | -0.0021268 | 9.765E-06 |
| GSK3A      | -0.0358753 | 9.777E-06 |
| KIDINS220  | -0.0496945 | 9.779E-06 |
| SPDYE3     | -0.0435028 | 9.826E-06 |
| PAM16      | 0.0561985  | 9.892E-06 |
| KPNA4      | -0.0669479 | 9.918E-06 |
| ORC2       | -0.0324233 | 1E-05     |
| KAT6B      | -0.2232963 | 1.001E-05 |
| ZNF768     | -0.0332445 | 1.009E-05 |
| ARHGEF1    | -0.0143968 | 1.011E-05 |
| GTF2H2C    | -0.0795385 | 1.022E-05 |
| TXLNG      | 0.0419961  | 1.025E-05 |
| HDHD3      | 0.0105781  | 1.027E-05 |
| VTI1B      | 0.0342022  | 1.031E-05 |
| RBM5       | -0.0887045 | 1.032E-05 |
| MDM4       | -0.1115511 | 1.034E-05 |
| DAZAP2     | -0.1538843 | 1.037E-05 |
| AP2S1      | 0.0805524  | 1.039E-05 |
| RAB3GAP2   | -0.051321  | 1.039E-05 |
| PACSIN2    | -0.1020473 | 1.044E-05 |
| PRH1       | -0.0455865 | 1.049E-05 |
| WDR41      | 0.0032255  | 1.049E-05 |
| ZNF146     | -0.0005543 | 1.058E-05 |
| RFX7       | -0.0067234 | 1.068E-05 |
| AC007038.2 | -0.0552113 | 1.069E-05 |
| SKIDA1     | -0.0361506 | 1.072E-05 |
| MYO1F      | -0.127764  | 1.073E-05 |
| METTL3     | -0.0265749 | 1.074E-05 |
| AC092683.1 | -0.1214874 | 1.075E-05 |
| TOM1       | -0.0779688 | 1.082E-05 |
| NDUFA6     | 0.0112967  | 1.086E-05 |
| MAN1B1     | 0.0168349  | 1.099E-05 |
| TRIM33     | -0.0848853 | 1.109E-05 |
| AC073957.3 | -0.0454496 | 1.12E-05  |
| PITPNA     | 0.0001644  | 1.12E-05  |
| SUMF1      | -0.0025632 | 1.136E-05 |

|            |            |           |
|------------|------------|-----------|
| HIPK2      | -0.121007  | 1.142E-05 |
| THAP5      | -0.0916076 | 1.143E-05 |
| COG2       | -0.0424731 | 1.145E-05 |
| VPS72      | -0.0279508 | 1.171E-05 |
| AC004854.2 | 0.0884625  | 1.172E-05 |
| AP002449.1 | -0.0391204 | 1.174E-05 |
| ARL17A     | -0.0791791 | 1.176E-05 |
| CRKL       | 0.0134841  | 1.178E-05 |
| GSAP       | -0.0413188 | 1.188E-05 |
| NISCH      | -0.069088  | 1.192E-05 |
| ILK        | 0.0366417  | 1.198E-05 |
| ZER1       | 0.0444467  | 1.202E-05 |
| INPP5B     | -0.023475  | 1.204E-05 |
| ZDHHC7     | -0.0350292 | 1.205E-05 |
| NFYB       | -0.0270272 | 1.205E-05 |
| UROD       | 0.0595061  | 1.207E-05 |
| GEMIN7     | -0.020515  | 1.218E-05 |
| MPV17L2    | -0.0173391 | 1.219E-05 |
| CUTC       | -0.010721  | 1.223E-05 |
| TIMM17B    | 0.0112948  | 1.224E-05 |
| ORC4       | -0.0491952 | 1.228E-05 |
| ITCH       | -0.0503133 | 1.231E-05 |
| TMEM127    | 0.0001879  | 1.236E-05 |
| CDK10      | -0.0056783 | 1.238E-05 |
| OGFOD3     | 0.0144125  | 1.24E-05  |
| SFT2D2     | -0.0813647 | 1.242E-05 |
| FAM228B    | -0.0716407 | 1.245E-05 |
| DENND1A    | -0.0254707 | 1.246E-05 |
| LINC01500  | -0.0325012 | 1.247E-05 |
| KDEL2      | 0.0515207  | 1.259E-05 |
| UPK3BL1    | -0.0382426 | 1.275E-05 |
| GLO1       | -0.0428727 | 1.278E-05 |
| COX14      | 0.1123475  | 1.281E-05 |
| VIM        | 0.2711449  | 1.286E-05 |
| MNAT1      | -0.0045546 | 1.286E-05 |
| P3H1       | -0.0197351 | 1.304E-05 |
| WDR75      | -0.0188803 | 1.305E-05 |
| STX18      | -0.0439022 | 1.315E-05 |
| PSMD1      | 0.0252995  | 1.316E-05 |
| NDUFS3     | 0.109627   | 1.318E-05 |
| SPNS3      | 0.1234885  | 1.32E-05  |
| CXCL2      | 0.1476885  | 1.329E-05 |
| HERC1      | -0.0924796 | 1.332E-05 |
| INSR       | -0.0684907 | 1.334E-05 |
| ZNF529     | -0.0437715 | 1.338E-05 |
| CUEDC2     | 0.0879967  | 1.352E-05 |
| RPL7L1     | -0.0653218 | 1.353E-05 |
| EIF4EBP2   | -0.1105766 | 1.364E-05 |
| TBC1D8     | -0.058254  | 1.366E-05 |
| CD2BP2     | 0.0661147  | 1.368E-05 |

|            |            |           |
|------------|------------|-----------|
| ADAMTSL4   | 0.1401639  | 1.372E-05 |
| N4BP2L1    | -0.0405807 | 1.381E-05 |
| SLC38A2    | -0.125489  | 1.382E-05 |
| COMMD4     | 0.0525016  | 1.392E-05 |
| PAPOLG     | -0.0486721 | 1.396E-05 |
| ASTE1      | 0.020078   | 1.405E-05 |
| HSPA9      | 0.1017024  | 1.413E-05 |
| STOM       | 0.1891228  | 1.414E-05 |
| ADSL       | 0.055731   | 1.427E-05 |
| RALB       | 0.0873847  | 1.432E-05 |
| C15orf39   | 0.1138624  | 1.437E-05 |
| NPEPPS     | -0.1618309 | 1.438E-05 |
| OARD1      | 0.0107351  | 1.439E-05 |
| ALAS1      | -0.0706446 | 1.448E-05 |
| FAM98B     | -0.0152849 | 1.462E-05 |
| PTPN11     | 0.0352717  | 1.464E-05 |
| NLK        | -0.1025609 | 1.47E-05  |
| MAP3K12    | -0.0356884 | 1.477E-05 |
| YLPM1      | -0.0195925 | 1.496E-05 |
| RAB5B      | -0.0659825 | 1.501E-05 |
| TRIM8      | -0.1014618 | 1.504E-05 |
| PDIA4      | -0.0443823 | 1.512E-05 |
| ZBED5      | -0.0159822 | 1.515E-05 |
| FAM214A    | -0.0697625 | 1.517E-05 |
| CD81       | 0.1538013  | 1.519E-05 |
| HIST2H2AC  | -0.0981501 | 1.519E-05 |
| RELB       | -0.0502527 | 1.519E-05 |
| NARS       | -0.1313854 | 1.523E-05 |
| QPRT       | -0.3147916 | 1.525E-05 |
| PRPF4B     | -0.1566816 | 1.533E-05 |
| ZBED4      | -0.1248226 | 1.539E-05 |
| SCAF4      | -0.016345  | 1.541E-05 |
| Z97192.3   | -0.1105598 | 1.546E-05 |
| AC108488.3 | -0.0354016 | 1.549E-05 |
| AATF       | 0.0660665  | 1.554E-05 |
| VAMP7      | -0.0444043 | 1.564E-05 |
| ATG10      | -0.012109  | 1.576E-05 |
| PLAA       | -0.0364247 | 1.577E-05 |
| GGA3       | -0.0378035 | 1.58E-05  |
| CENPB      | 0.0605317  | 1.585E-05 |
| HUWE1      | -0.030106  | 1.595E-05 |
| RAB3D      | -0.07364   | 1.605E-05 |
| MAP3K11    | 0.066254   | 1.606E-05 |
| HLA-A      | 0.3201895  | 1.611E-05 |
| VPS18      | -0.0038196 | 1.615E-05 |
| GRN        | -0.2572113 | 1.62E-05  |
| SLC46A3    | -0.0142376 | 1.623E-05 |
| BBS2       | -0.0167686 | 1.624E-05 |
| SMNDC1     | -0.085143  | 1.63E-05  |
| PLEKHM2    | -0.0397886 | 1.633E-05 |

|           |            |           |
|-----------|------------|-----------|
| CD180     | 0.1304461  | 1.638E-05 |
| RFX5      | -0.0599091 | 1.638E-05 |
| ARHGDI1   | -0.0058357 | 1.656E-05 |
| HENMT1    | -0.0836233 | 1.669E-05 |
| BAG4      | -0.0920934 | 1.677E-05 |
| SLF2      | -0.0616564 | 1.678E-05 |
| SLC25A11  | 0.0916814  | 1.679E-05 |
| HIP1      | 0.1235365  | 1.68E-05  |
| LINC01003 | -0.0052712 | 1.69E-05  |
| ZNF43     | -0.0511775 | 1.694E-05 |
| TET3      | -0.041672  | 1.697E-05 |
| FBXO9     | -0.0548174 | 1.7E-05   |
| RANBP9    | -0.0613773 | 1.705E-05 |
| HLA-E     | 0.2776269  | 1.709E-05 |
| ZNF594    | -0.0013867 | 1.712E-05 |
| ZNF12     | 0.0068786  | 1.718E-05 |
| CAND1     | -0.0387993 | 1.725E-05 |
| PREB      | 0.0002257  | 1.733E-05 |
| CDC34     | 0.0090483  | 1.744E-05 |
| DPP3      | -0.008679  | 1.745E-05 |
| SRI       | 0.1747759  | 1.752E-05 |
| IMMP1L    | -0.0216005 | 1.757E-05 |
| ERMAP     | -0.0494647 | 1.765E-05 |
| LRCH4     | 0.0397479  | 1.781E-05 |
| UBE2G1    | -0.0327895 | 1.784E-05 |
| UQCRC1    | 0.004741   | 1.785E-05 |
| TRPM2     | -0.0586555 | 1.803E-05 |
| COX16     | -0.089486  | 1.813E-05 |
| POLR3K    | 0.0303904  | 1.832E-05 |
| ST3GAL2   | -0.0555131 | 1.835E-05 |
| CDCA7     | 0.1431717  | 1.84E-05  |
| UBE2L6    | 0.0475921  | 1.845E-05 |
| SNX29     | -0.0240201 | 1.846E-05 |
| SF3A2     | -0.0627126 | 1.852E-05 |
| ECI2      | 0.0884137  | 1.879E-05 |
| DUSP23    | 0.0612063  | 1.88E-05  |
| PDHX      | 0.0011227  | 1.886E-05 |
| PPFIBP1   | -0.0309193 | 1.893E-05 |
| SPIN2B    | -0.0291735 | 1.902E-05 |
| GANAB     | -0.053626  | 1.906E-05 |
| TCERG1    | -0.078919  | 1.911E-05 |
| ZMIZ2     | -0.0380635 | 1.917E-05 |
| SRP54     | 0.0149758  | 1.924E-05 |
| MFAP1     | 0.0741043  | 1.928E-05 |
| CDC37     | 0.0721464  | 1.948E-05 |
| DCTD      | 0.0080284  | 1.955E-05 |
| WRN       | -0.0127235 | 1.96E-05  |
| EXOSC10   | -0.0165986 | 1.963E-05 |
| NOB1      | -0.0033854 | 1.965E-05 |
| STX7      | -0.19958   | 1.983E-05 |

|            |            |           |
|------------|------------|-----------|
| HEIH       | 0.0225548  | 1.994E-05 |
| STAM2      | -0.0337664 | 2.005E-05 |
| WDR12      | -0.0379533 | 2.01E-05  |
| AKIRIN1    | -0.032864  | 2.011E-05 |
| ITGAX      | 0.0744408  | 2.022E-05 |
| SOD2       | 0.0624761  | 2.027E-05 |
| AIP        | 0.0882244  | 2.03E-05  |
| RAB11A     | 0.0068703  | 2.03E-05  |
| VMP1       | 0.0360597  | 2.04E-05  |
| GABPA      | -0.078285  | 2.04E-05  |
| SLCO3A1    | -0.1182969 | 2.049E-05 |
| PGAM5      | -0.0351745 | 2.057E-05 |
| RELT       | 0.0846568  | 2.058E-05 |
| AL135925.1 | -0.0117076 | 2.07E-05  |
| SP110      | 0.0945876  | 2.073E-05 |
| ZNF273     | -0.001251  | 2.074E-05 |
| MTHFD1L    | -0.0306407 | 2.077E-05 |
| MGAT4B     | 0.0919413  | 2.086E-05 |
| PDCL3      | -0.0285481 | 2.093E-05 |
| MITD1      | -0.1038034 | 2.094E-05 |
| SNRPB      | 0.1263214  | 2.094E-05 |
| TSEN15     | -0.0387203 | 2.095E-05 |
| CDC27      | -0.0289801 | 2.097E-05 |
| PPP1CC     | 0.0271383  | 2.105E-05 |
| RABEP1     | 0.0183404  | 2.111E-05 |
| RCC1       | -0.0263382 | 2.113E-05 |
| STK38L     | -0.1070822 | 2.119E-05 |
| SUMO3      | -0.1276098 | 2.13E-05  |
| RBPJ       | -0.1062358 | 2.137E-05 |
| EVI5       | -0.095087  | 2.138E-05 |
| CRLF3      | -0.0516175 | 2.141E-05 |
| PTRH2      | 0.0579253  | 2.144E-05 |
| TMEM68     | -0.0026024 | 2.147E-05 |
| UBAC2      | 0.0210164  | 2.147E-05 |
| TRADD      | 0.0240901  | 2.16E-05  |
| ST3GAL4    | 0.0078798  | 2.16E-05  |
| PIGC       | -0.0704161 | 2.175E-05 |
| ZMYM3      | -0.030869  | 2.182E-05 |
| RNF4       | -0.0039653 | 2.214E-05 |
| SF3A3      | 0.0509668  | 2.225E-05 |
| NPR3       | 0.1705842  | 2.233E-05 |
| PPP2R2A    | 0.0445778  | 2.255E-05 |
| UPF1       | -0.0153085 | 2.257E-05 |
| TMEM42     | 0.0049499  | 2.269E-05 |
| AC004847.1 | -0.0391901 | 2.271E-05 |
| KIAA0100   | -0.042751  | 2.276E-05 |
| ENO1       | -0.1436052 | 2.291E-05 |
| THAP4      | 0.0097492  | 2.298E-05 |
| FADS2      | -0.0231228 | 2.305E-05 |
| PPP2R1A    | -0.0273011 | 2.328E-05 |

|            |            |           |
|------------|------------|-----------|
| ZNF134     | -0.0128873 | 2.338E-05 |
| SAT2       | 0.0757135  | 2.354E-05 |
| GPT2       | -0.0072737 | 2.357E-05 |
| RASSF2     | -0.0913885 | 2.372E-05 |
| NELFE      | 0.0244367  | 2.373E-05 |
| ECI1       | 0.0807546  | 2.378E-05 |
| STK11      | 0.0099766  | 2.393E-05 |
| GSTZ1      | 0.084146   | 2.402E-05 |
| HPCAL1     | 0.1030757  | 2.405E-05 |
| SMIM20     | 0.0218038  | 2.406E-05 |
| RNPS1      | -0.0916726 | 2.41E-05  |
| BRIX1      | 0.0354     | 2.418E-05 |
| ROMO1      | -0.164131  | 2.432E-05 |
| ATP9B      | -0.03829   | 2.437E-05 |
| ALG11      | -0.0472218 | 2.441E-05 |
| MTHFD2L    | -0.1226958 | 2.446E-05 |
| RHOQ       | 0.0144947  | 2.45E-05  |
| SMIM29     | 0.0410975  | 2.459E-05 |
| AC080038.1 | -0.0474444 | 2.47E-05  |
| NUDCD1     | 0.0634472  | 2.478E-05 |
| SELENOT    | -0.003862  | 2.492E-05 |
| ANAPC4     | -0.0329184 | 2.502E-05 |
| PIBF1      | -0.0428671 | 2.525E-05 |
| GSE1       | -0.196707  | 2.527E-05 |
| DENND4A    | -0.0404532 | 2.534E-05 |
| KLHDC1     | -0.0212581 | 2.567E-05 |
| SLC66A2    | 0.0270875  | 2.573E-05 |
| TBC1D17    | -0.0562363 | 2.575E-05 |
| MAP2K5     | -0.0065612 | 2.575E-05 |
| NSUN6      | -0.0404281 | 2.584E-05 |
| KDM6B      | -0.0340253 | 2.59E-05  |
| ZC3H11A    | -0.0392031 | 2.598E-05 |
| ZBTB26     | -0.0074519 | 2.607E-05 |
| NUP107     | -0.0475766 | 2.61E-05  |
| ZNFX1      | -0.0062864 | 2.61E-05  |
| NAE1       | 0.0515329  | 2.616E-05 |
| AC096667.1 | -0.1543421 | 2.623E-05 |
| SEH1L      | -0.0596979 | 2.624E-05 |
| BCAS2      | 0.0281298  | 2.627E-05 |
| TTN        | -0.0424661 | 2.628E-05 |
| SPOP       | 0.0588747  | 2.642E-05 |
| FAM160B2   | -0.0122922 | 2.645E-05 |
| CDT1       | 0.1234392  | 2.649E-05 |
| RRAGB      | 0.0505073  | 2.656E-05 |
| ARMCX3     | 0.158048   | 2.661E-05 |
| PDE7A      | 0.0866681  | 2.695E-05 |
| FBXO42     | -0.0170337 | 2.699E-05 |
| KIAA1143   | -0.1020611 | 2.703E-05 |
| BRF2       | -0.0039616 | 2.715E-05 |
| C1RL       | 0.0212621  | 2.716E-05 |



|            |            |           |
|------------|------------|-----------|
| KLHDC8B    | 0.0785979  | 2.719E-05 |
| LAGE3      | 0.0689352  | 2.72E-05  |
| PDIA6      | 0.1245518  | 2.722E-05 |
| SLC9A3-AS' | -0.0362062 | 2.74E-05  |
| TMEM63A    | 0.1058693  | 2.749E-05 |
| KAT5       | -0.0146277 | 2.756E-05 |
| MPC1       | -0.1106519 | 2.761E-05 |
| UBQLN4     | -0.0312776 | 2.779E-05 |
| TMEM106A   | -0.035263  | 2.786E-05 |
| TRAPPC10   | -0.104294  | 2.795E-05 |
| PDK2       | 0.0045722  | 2.795E-05 |
| PRPF38A    | -0.027624  | 2.798E-05 |
| HIST1H2BC  | 0.013775   | 2.799E-05 |
| EAF2       | 0.1693567  | 2.806E-05 |
| FPGS       | 0.0232704  | 2.808E-05 |
| H2AFZ      | 0.3125859  | 2.808E-05 |
| SLC30A9    | -0.0891204 | 2.821E-05 |
| KCNN4      | 0.0235268  | 2.821E-05 |
| DRG1       | -0.0058558 | 2.824E-05 |
| CREB3L2    | -0.0987812 | 2.833E-05 |
| NUP85      | -0.0457302 | 2.842E-05 |
| PRR12      | -0.0544716 | 2.846E-05 |
| MATK       | 0.114769   | 2.848E-05 |
| COQ7       | 0.0723028  | 2.849E-05 |
| SLC33A1    | -0.0936374 | 2.85E-05  |
| CUL1       | -0.0056051 | 2.851E-05 |
| HECTD4     | -0.0616249 | 2.861E-05 |
| COG5       | -0.0161001 | 2.864E-05 |
| CREG1      | -0.1758699 | 2.871E-05 |
| MSL1       | -0.0335363 | 2.873E-05 |
| MPDU1      | -0.017636  | 2.881E-05 |
| CTDSP1     | -0.0338317 | 2.884E-05 |
| RNF44      | -0.1228697 | 2.895E-05 |
| EIF2AK1    | -0.1106465 | 2.898E-05 |
| BCR        | 0.033698   | 2.902E-05 |
| DTD1       | 0.0792578  | 2.905E-05 |
| NUP205     | -0.0093909 | 2.912E-05 |
| AC022098.1 | -0.0263084 | 2.916E-05 |
| SNHG15     | -0.0910156 | 2.925E-05 |
| EMG1       | 0.0789102  | 2.942E-05 |
| CHCHD1     | 0.1023555  | 2.951E-05 |
| ACTR8      | -0.0237363 | 2.956E-05 |
| FKBP7      | -0.0053762 | 2.978E-05 |
| IRAK1      | -0.055582  | 2.993E-05 |
| MARCH5     | -0.0700331 | 2.997E-05 |
| GIMAP2     | -0.004261  | 2.999E-05 |
| ZNF780A    | 0.0178232  | 3.011E-05 |
| LAMTOR2    | 0.1149319  | 3.033E-05 |
| VPS33A     | -0.0415629 | 3.038E-05 |
| HEATR5B    | -0.0825482 | 3.059E-05 |

|            |            |           |
|------------|------------|-----------|
| INTS14     | 0.0083225  | 3.079E-05 |
| CRYZ       | 0.0071814  | 3.08E-05  |
| MBD2       | 0.0738259  | 3.098E-05 |
| IER3IP1    | 0.0397029  | 3.102E-05 |
| ZNF33B     | -0.054265  | 3.11E-05  |
| TMEM165    | -0.0797715 | 3.122E-05 |
| RHPN1      | -0.0182572 | 3.124E-05 |
| SENP7      | -0.0669425 | 3.126E-05 |
| PAFAH1B2   | -0.0152886 | 3.128E-05 |
| FAM118A    | -0.0595732 | 3.13E-05  |
| TMEM160    | 0.1369708  | 3.133E-05 |
| SEC22C     | -0.0081698 | 3.135E-05 |
| RALA       | 0.1299853  | 3.139E-05 |
| SPG21      | -0.0269819 | 3.153E-05 |
| PNPT1      | -0.0772519 | 3.155E-05 |
| MTPAP      | -0.0337923 | 3.177E-05 |
| LPCAT1     | -0.0272835 | 3.184E-05 |
| TRAPPC2L   | 0.0774417  | 3.203E-05 |
| TCF3       | -0.0206223 | 3.235E-05 |
| UBR1       | -0.0461623 | 3.238E-05 |
| PPIP5K1    | -0.0415067 | 3.24E-05  |
| TRMT61B    | 0.0242166  | 3.249E-05 |
| HIF1AN     | -0.0220589 | 3.253E-05 |
| INPP4A     | -0.0173396 | 3.259E-05 |
| PIM3       | 0.0496186  | 3.279E-05 |
| ST3GAL1    | 0.1168087  | 3.288E-05 |
| BRD8       | -0.0660135 | 3.299E-05 |
| C1orf109   | -0.0372856 | 3.341E-05 |
| ACACA      | -0.0138506 | 3.342E-05 |
| C1D        | -0.0335956 | 3.348E-05 |
| DCLRE1C    | -0.0792895 | 3.363E-05 |
| AC022087.1 | -0.031236  | 3.368E-05 |
| DCAF16     | -0.0876898 | 3.382E-05 |
| RC3H1      | -0.13178   | 3.388E-05 |
| SLAIN2     | -0.0078461 | 3.392E-05 |
| DCUN1D3    | 0.1065301  | 3.397E-05 |
| GLMN       | -0.0619994 | 3.47E-05  |
| SSH1       | -0.0702076 | 3.471E-05 |
| CTDSP2     | 0.0200578  | 3.484E-05 |
| LINC02245  | -0.0226954 | 3.49E-05  |
| CMC2       | -0.0990701 | 3.499E-05 |
| PLGLB2     | -0.0386894 | 3.503E-05 |
| ZBTB7A     | -0.0488857 | 3.504E-05 |
| ZDHHC20    | -0.0759226 | 3.514E-05 |
| ZNF814     | -0.0683208 | 3.518E-05 |
| ARIH2      | -0.0356369 | 3.529E-05 |
| TMC3-AS1   | -0.0406672 | 3.537E-05 |
| YWHAQ      | 0.0355163  | 3.542E-05 |
| MYL6B      | 0.0713825  | 3.552E-05 |
| ZNF566     | -0.0618041 | 3.561E-05 |

|            |            |           |
|------------|------------|-----------|
| CHMP1A     | -0.0190334 | 3.577E-05 |
| AC064805.2 | -0.0332934 | 3.582E-05 |
| RAB8A      | 0.135504   | 3.586E-05 |
| TWF1       | -0.0057543 | 3.636E-05 |
| AKR7A2     | 0.1361289  | 3.649E-05 |
| FKTN       | -0.0236103 | 3.652E-05 |
| GDAP2      | -0.0157892 | 3.658E-05 |
| ZNF830     | -0.0681019 | 3.669E-05 |
| PRR14      | 0.0007555  | 3.673E-05 |
| MRPS14     | -0.0023807 | 3.677E-05 |
| SMIM27     | -0.1724598 | 3.687E-05 |
| TGFBR1     | -0.0319258 | 3.698E-05 |
| ZNF101     | -0.0310964 | 3.709E-05 |
| GMIP       | -0.055148  | 3.716E-05 |
| ACTR1B     | 0.0548506  | 3.743E-05 |
| SLC25A37   | -0.1393992 | 3.765E-05 |
| PIK3C3     | -0.1305453 | 3.77E-05  |
| AC073389.1 | 0.0092066  | 3.773E-05 |
| TEN1       | -0.0157644 | 3.778E-05 |
| IMPDH1     | 0.0589887  | 3.792E-05 |
| FDPS       | 0.0513791  | 3.812E-05 |
| CLEC2B     | 0.162526   | 3.828E-05 |
| STMN3      | 0.0043481  | 3.839E-05 |
| TNIP1      | -0.0484583 | 3.855E-05 |
| KMT2E      | -0.1126426 | 3.856E-05 |
| EIF4H      | -0.0123168 | 3.862E-05 |
| PTDSS1     | -0.1183759 | 3.872E-05 |
| MXD4       | -0.065687  | 3.872E-05 |
| ATP2A2     | 0.0536129  | 3.881E-05 |
| GOLT1B     | 0.0072631  | 3.891E-05 |
| ETFA       | 0.0020441  | 3.895E-05 |
| PDK3       | -0.0393756 | 3.917E-05 |
| RBL2       | -0.0918781 | 3.932E-05 |
| METTL17    | -0.0545477 | 3.94E-05  |
| DICER1     | -0.1472578 | 3.942E-05 |
| BIN3       | -0.0236853 | 3.961E-05 |
| PRELID3B   | -0.0266982 | 3.962E-05 |
| PSMA7      | 0.1968221  | 3.977E-05 |
| CRYZL1     | -0.0108344 | 3.98E-05  |
| SNHG5      | -0.1852925 | 3.994E-05 |
| TPRKB      | -0.0445003 | 4.016E-05 |
| NCL        | 0.2861048  | 4.037E-05 |
| LYPLAL1    | 0.022954   | 4.05E-05  |
| TNFRSF4    | 0.2771576  | 4.059E-05 |
| SLC38A1    | 0.207949   | 4.109E-05 |
| RUVBL2     | 0.0886728  | 4.111E-05 |
| CBL        | 0.0541969  | 4.113E-05 |
| VAMP3      | -0.0269776 | 4.137E-05 |
| AC092171.3 | -0.0477332 | 4.148E-05 |
| GNG10      | 0.159402   | 4.151E-05 |

|           |            |           |
|-----------|------------|-----------|
| BMS1      | -0.0740166 | 4.151E-05 |
| HDAC1     | 0.0366074  | 4.177E-05 |
| SIRT7     | -0.0365276 | 4.177E-05 |
| RNF38     | -0.060873  | 4.18E-05  |
| STX16     | 0.1467483  | 4.223E-05 |
| ZCCHC8    | -0.0439171 | 4.239E-05 |
| FBXO45    | 0.0824139  | 4.242E-05 |
| EIF4E     | -0.0326925 | 4.278E-05 |
| NUP88     | 0.0051931  | 4.303E-05 |
| ABL2      | -0.0245407 | 4.315E-05 |
| RFC5      | -0.0084548 | 4.346E-05 |
| HEATR1    | -0.0219792 | 4.355E-05 |
| NKD1      | -0.0634486 | 4.382E-05 |
| TLK2      | -0.0762069 | 4.387E-05 |
| BZW1      | -0.0581727 | 4.391E-05 |
| ZMYM4     | 0.0316229  | 4.395E-05 |
| SRSF1     | -0.0214597 | 4.4E-05   |
| ZNF622    | 0.0535437  | 4.405E-05 |
| TSC2      | -0.0547933 | 4.423E-05 |
| SWI5      | 0.0655524  | 4.423E-05 |
| STK38     | -0.0638457 | 4.436E-05 |
| PSMC3     | -0.0098016 | 4.447E-05 |
| SLC35E3   | -0.1476651 | 4.47E-05  |
| LINC01278 | -0.0387192 | 4.476E-05 |
| NUTM2B-AS | -0.0897683 | 4.496E-05 |
| NADSYN1   | -0.0269199 | 4.521E-05 |
| PAN3      | -0.0852613 | 4.521E-05 |
| DR1       | -0.0005117 | 4.539E-05 |
| FAM193B   | -0.0062938 | 4.582E-05 |
| BORCS5    | -0.0293275 | 4.591E-05 |
| PRKCQ     | 0.0151161  | 4.605E-05 |
| PRICKLE1  | 0.0996976  | 4.621E-05 |
| PDCD4     | -0.2391228 | 4.643E-05 |
| SEPTIN9   | -0.0115475 | 4.672E-05 |
| AP3S2     | -0.0188092 | 4.672E-05 |
| CREB1     | -0.160115  | 4.712E-05 |
| NFKB1     | -0.0153971 | 4.714E-05 |
| MRPS9     | 0.0253556  | 4.74E-05  |
| XPO6      | 0.0228969  | 4.743E-05 |
| MPP5      | -0.0025114 | 4.766E-05 |
| SLC17A9   | 0.0644132  | 4.79E-05  |
| MTR       | -0.0111704 | 4.798E-05 |
| ARL8B     | -0.129974  | 4.815E-05 |
| PLEKHF1   | -0.0400835 | 4.816E-05 |
| DNAJB4    | -0.0085295 | 4.87E-05  |
| SIK3      | -0.0301217 | 4.877E-05 |
| PHKG2     | -0.041825  | 4.884E-05 |
| SCAP      | -0.0058366 | 4.91E-05  |
| IPO8      | -0.0855525 | 4.915E-05 |
| EBAG9     | 0.0492538  | 4.928E-05 |

|           |            |           |
|-----------|------------|-----------|
| LRMP      | 0.0416549  | 4.934E-05 |
| SCAMP1-AS | 0.0053103  | 4.973E-05 |
| USP10     | 0.0597797  | 4.978E-05 |
| SAP30L    | -0.0029605 | 4.983E-05 |
| ATE1      | -0.0530094 | 5.024E-05 |
| CHIC2     | 0.0027054  | 5.037E-05 |
| C19orf18  | -0.01384   | 5.046E-05 |
| CCDC22    | 0.0305124  | 5.047E-05 |
| ZFPM1     | 0.0448479  | 5.051E-05 |
| ZNF160    | 0.003801   | 5.075E-05 |
| R3HCC1    | 0.0463937  | 5.099E-05 |
| ALDH5A1   | 0.0685699  | 5.104E-05 |
| SDHAF1    | -0.0264721 | 5.109E-05 |
| HSPB11    | 0.0303838  | 5.13E-05  |
| AP1B1     | -0.0061255 | 5.134E-05 |
| SFSWAP    | -0.0030253 | 5.137E-05 |
| CEBPZOS   | -0.0443941 | 5.146E-05 |
| HOXA10    | -0.1188737 | 5.158E-05 |
| SPOPL     | -0.052092  | 5.159E-05 |
| TBKBP1    | -0.0087963 | 5.176E-05 |
| KTI12     | -0.0164703 | 5.183E-05 |
| WARS      | -0.0088033 | 5.189E-05 |
| CNOT9     | -0.060723  | 5.201E-05 |
| RIN3      | -0.0982223 | 5.208E-05 |
| GTPBP2    | -0.0454439 | 5.271E-05 |
| SND1      | 0.0421429  | 5.282E-05 |
| WDR18     | 0.086092   | 5.285E-05 |
| RNF111    | -0.018621  | 5.326E-05 |
| HIBCH     | -0.0042495 | 5.333E-05 |
| VPS13B-DT | -0.0528672 | 5.354E-05 |
| CBWD2     | -0.1023971 | 5.372E-05 |
| ZNF83     | -0.0174196 | 5.377E-05 |
| SSBP4     | 0.0667065  | 5.469E-05 |
| PRMT5     | -0.0354735 | 5.473E-05 |
| ZFAND6    | -0.1302916 | 5.503E-05 |
| CRTC2     | -0.0322096 | 5.538E-05 |
| CYFIP2    | 0.1720934  | 5.563E-05 |
| XPC       | -0.0767164 | 5.565E-05 |
| PLCXD1    | 0.0482796  | 5.585E-05 |
| FAM168B   | -0.0307735 | 5.594E-05 |
| DEPTOR    | -0.0756899 | 5.605E-05 |
| GPATCH4   | 0.1459313  | 5.624E-05 |
| MBD3      | -0.0192183 | 5.625E-05 |
| ST7L      | -0.0174945 | 5.643E-05 |
| MAPK1IP1L | -0.0727065 | 5.668E-05 |
| CREB3     | 0.0153496  | 5.695E-05 |
| FAM120A   | -0.0444878 | 5.705E-05 |
| DDOST     | 0.0867406  | 5.709E-05 |
| SURF2     | 0.045272   | 5.725E-05 |
| RNF216    | -0.0006957 | 5.732E-05 |

|            |            |           |
|------------|------------|-----------|
| MBIP       | -0.0205189 | 5.737E-05 |
| MFSD3      | -0.007818  | 5.774E-05 |
| AL355336.1 | -0.0429005 | 5.776E-05 |
| MTFR1      | -0.0296223 | 5.8E-05   |
| IL12A-AS1  | -0.1651768 | 5.804E-05 |
| RSBN1      | 0.0223572  | 5.805E-05 |
| ECHDC1     | -0.0343004 | 5.812E-05 |
| PYROXD1    | -0.0648121 | 5.817E-05 |
| RPS28      | -0.1338686 | 5.829E-05 |
| HEATR3     | -0.0219892 | 5.83E-05  |
| GOT2       | 0.045693   | 5.868E-05 |
| RBFA       | 0.1110754  | 5.876E-05 |
| RAB35      | -0.0260736 | 5.887E-05 |
| METTL7A    | -0.12135   | 5.939E-05 |
| TMEM64     | 0.0156444  | 5.964E-05 |
| AC018362.1 | -0.0589675 | 6.027E-05 |
| NCF4       | -0.2441665 | 6.062E-05 |
| SHOC2      | -0.1020573 | 6.064E-05 |
| AC026471.1 | 0.051067   | 6.096E-05 |
| TADA3      | -0.005254  | 6.117E-05 |
| TAF8       | -0.030079  | 6.132E-05 |
| SLC8B1     | -0.0599538 | 6.137E-05 |
| AK6        | 0.0530638  | 6.14E-05  |
| RRM2B      | -0.1430062 | 6.152E-05 |
| SF3A1      | -0.0585091 | 6.154E-05 |
| NUCB1      | 0.0030534  | 6.161E-05 |
| CENPX      | 0.0244365  | 6.199E-05 |
| LCT        | 0.0826491  | 6.204E-05 |
| SUPT20H    | -0.0694765 | 6.225E-05 |
| KAT8       | -0.0206064 | 6.225E-05 |
| SEC13      | -0.042707  | 6.25E-05  |
| COPB1      | 0.0244437  | 6.273E-05 |
| IFI27L1    | 0.0175842  | 6.275E-05 |
| UBXN2A     | -0.0612678 | 6.279E-05 |
| ARF3       | 0.0544696  | 6.289E-05 |
| CYB5R3     | 0.0561967  | 6.319E-05 |
| SAMD4B     | -0.0142252 | 6.321E-05 |
| CCNT1      | 0.0401873  | 6.325E-05 |
| CARS2      | 0.0519785  | 6.336E-05 |
| MRPL30     | -0.0587943 | 6.358E-05 |
| DNAJB12    | -0.0126941 | 6.381E-05 |
| RNPEP      | -0.0152392 | 6.4E-05   |
| GARS-DT    | -0.0809904 | 6.434E-05 |
| MAGED1     | 0.1047215  | 6.446E-05 |
| SNAP29     | 0.0604668  | 6.472E-05 |
| SMARCD2    | 0.0401568  | 6.476E-05 |
| SETMAR     | -0.0052364 | 6.485E-05 |
| FRMD4B     | 0.1246784  | 6.488E-05 |
| LBHD1      | 0.0201168  | 6.492E-05 |
| PAK1IP1    | -0.0466725 | 6.504E-05 |

|           |            |           |
|-----------|------------|-----------|
| FAM215B   | -0.0147364 | 6.513E-05 |
| CAPZA2    | -0.0876913 | 6.532E-05 |
| MAP3K5    | -0.030758  | 6.533E-05 |
| TMEM177   | 0.0212613  | 6.533E-05 |
| CDIPT     | 0.0245456  | 6.537E-05 |
| SP3       | -0.0941321 | 6.542E-05 |
| RRP15     | -0.0544237 | 6.542E-05 |
| IL1B      | 0.2317297  | 6.552E-05 |
| ABHD3     | -0.0296738 | 6.584E-05 |
| VEZF1     | -0.1005861 | 6.593E-05 |
| KCNE3     | -0.1191316 | 6.618E-05 |
| NAT14     | 0.0506822  | 6.643E-05 |
| SLC22A16  | 0.0448577  | 6.665E-05 |
| RAI1      | -0.0349997 | 6.675E-05 |
| ELK4      | -0.0819931 | 6.696E-05 |
| SPNS1     | -0.032528  | 6.706E-05 |
| ZFR       | -0.0908791 | 6.706E-05 |
| HIPK1     | -0.1225836 | 6.719E-05 |
| PHACTR4   | -0.1019184 | 6.731E-05 |
| FABP5     | 0.2292996  | 6.77E-05  |
| ISOC2     | 0.0729909  | 6.806E-05 |
| TFE3      | -0.0314353 | 6.849E-05 |
| LARP1B    | -0.013559  | 6.854E-05 |
| ATP11A    | -0.0400943 | 6.872E-05 |
| PHF6      | -0.0194747 | 6.917E-05 |
| LMO2      | -0.2245026 | 6.954E-05 |
| PDP1      | -0.0416371 | 6.969E-05 |
| SYNGR1    | 0.1939188  | 7.021E-05 |
| CANT1     | 0.0079643  | 7.024E-05 |
| GLRX2     | -0.002064  | 7.084E-05 |
| ARHGAP45  | -0.0329749 | 7.104E-05 |
| FAR2      | 0.012628   | 7.134E-05 |
| CISD3     | 0.0887095  | 7.161E-05 |
| SPRTN     | -0.0305539 | 7.164E-05 |
| PMF1      | 0.0766788  | 7.208E-05 |
| LINC00623 | -0.0510615 | 7.226E-05 |
| ATAD2     | 0.0867771  | 7.228E-05 |
| IRF2      | 0.0590448  | 7.267E-05 |
| KIF22     | -0.0676236 | 7.276E-05 |
| PTK2B     | 0.0029995  | 7.328E-05 |
| HNRNPH2   | 0.0059663  | 7.348E-05 |
| TIAL1     | -0.089575  | 7.353E-05 |
| HGSNAT    | 0.0054755  | 7.362E-05 |
| TCAIM     | -0.0897054 | 7.404E-05 |
| ADARB1    | -0.0282144 | 7.425E-05 |
| CHMP2A    | 0.1096206  | 7.441E-05 |
| BCL9L     | -0.0590104 | 7.447E-05 |
| SCAI      | -0.0441069 | 7.452E-05 |
| VPS4B     | -0.0802059 | 7.455E-05 |
| GTF2H4    | 0.02233    | 7.484E-05 |

|            |            |           |
|------------|------------|-----------|
| ICMT       | -0.0119397 | 7.507E-05 |
| THAP11     | -0.0191468 | 7.594E-05 |
| EBP        | -0.0510809 | 7.633E-05 |
| MRPL16     | 0.0298762  | 7.645E-05 |
| FAM172A    | -0.0539034 | 7.647E-05 |
| CCDC124    | 0.0491014  | 7.672E-05 |
| STMP1      | -0.189331  | 7.717E-05 |
| LARP4      | -0.0413503 | 7.734E-05 |
| RABGEF1    | -0.0158804 | 7.813E-05 |
| BIRC3      | -0.1502272 | 7.83E-05  |
| SMC1A      | -0.0229458 | 7.84E-05  |
| RNF8       | 0.0308127  | 7.841E-05 |
| CENPU      | 0.0537878  | 7.859E-05 |
| NAPA       | 0.0187658  | 7.878E-05 |
| DLEU1      | -0.0120144 | 7.881E-05 |
| XRRA1      | -0.0697514 | 7.884E-05 |
| SSRP1      | 0.0892748  | 7.888E-05 |
| PSMC1      | -0.0465003 | 7.92E-05  |
| DPH3       | -0.0036952 | 7.927E-05 |
| FIGNL1     | 0.0044706  | 8.046E-05 |
| LINC00847  | -0.0061117 | 8.072E-05 |
| AC004951.1 | -0.0795743 | 8.156E-05 |
| HSPH1      | 0.0239988  | 8.157E-05 |
| LASP1      | 0.0033605  | 8.218E-05 |
| CLIP2      | 0.0334375  | 8.236E-05 |
| MRPL43     | 0.0404165  | 8.274E-05 |
| DNPH1      | 0.1348742  | 8.275E-05 |
| SETD3      | -0.0185367 | 8.357E-05 |
| U2AF2      | -0.050193  | 8.378E-05 |
| APEH       | -0.0048859 | 8.385E-05 |
| DLG1       | -0.0357785 | 8.393E-05 |
| SURF1      | 0.0324177  | 8.417E-05 |
| ARPC5      | 0.059505   | 8.452E-05 |
| SEMA6B     | -0.0572803 | 8.493E-05 |
| SLC30A7    | -0.0533412 | 8.5E-05   |
| CCM2       | -0.0452417 | 8.531E-05 |
| RNF146     | 0.0188098  | 8.539E-05 |
| BMF        | -0.0304556 | 8.58E-05  |
| MRTO4      | 0.0429713  | 8.587E-05 |
| PRMT2      | -0.0724383 | 8.616E-05 |
| ANKRD27    | -0.0916618 | 8.664E-05 |
| ZBED3      | 0.0823764  | 8.666E-05 |
| FOXK2      | -0.0524772 | 8.686E-05 |
| MRPL19     | 0.0399721  | 8.699E-05 |
| ZNF627     | -0.0463603 | 8.72E-05  |
| EPM2A      | -0.0283996 | 8.748E-05 |
| MRPS27     | 0.0315219  | 8.806E-05 |
| POLR2F     | 0.0223331  | 8.814E-05 |
| RNF220     | -0.0724771 | 8.831E-05 |
| FAM174A    | -0.0106739 | 8.832E-05 |



|           |            |           |
|-----------|------------|-----------|
| PLEKHA3   | 0.0059086  | 8.893E-05 |
| RAD51D    | -0.0271941 | 8.913E-05 |
| NOA1      | -0.0017821 | 8.935E-05 |
| VAT1      | -0.0877651 | 8.99E-05  |
| SMG5      | 0.005892   | 9.046E-05 |
| MAP4      | -0.0587668 | 9.073E-05 |
| ZMAT3     | -0.0589004 | 9.128E-05 |
| NCAPD2    | -0.003127  | 9.137E-05 |
| MILR1     | -0.0414139 | 9.211E-05 |
| DROSHA    | -0.0293287 | 9.217E-05 |
| YIPF6     | 0.0054018  | 9.229E-05 |
| MMGT1     | 0.0043328  | 9.267E-05 |
| MRPL23    | -0.0549812 | 9.295E-05 |
| COQ10B    | -0.0555105 | 9.297E-05 |
| XPNPEP1   | -0.0462553 | 9.299E-05 |
| COX10-AS1 | -0.0192156 | 9.301E-05 |
| PHF23     | -0.0545288 | 9.336E-05 |
| ACCS      | -0.003775  | 9.356E-05 |
| NOG       | -0.0797251 | 9.385E-05 |
| ANAPC7    | 0.0475154  | 9.386E-05 |
| SEC23B    | -0.0415241 | 9.387E-05 |
| ZNRF2     | 0.010956   | 9.425E-05 |
| ACTL6A    | 0.0341436  | 9.471E-05 |
| FTX       | -0.2114413 | 9.493E-05 |
| SELENOP   | 0.2009145  | 9.499E-05 |
| ATF7      | -0.0273825 | 9.551E-05 |
| ZC3H7A    | -0.07484   | 9.562E-05 |
| STAU2     | -0.0149687 | 9.573E-05 |
| ERI3      | 0.0235096  | 9.579E-05 |
| WDR83     | -0.0174138 | 9.586E-05 |
| HNRNPUL2  | -0.0614384 | 9.607E-05 |
| RPP21     | 0.0233139  | 9.617E-05 |
| PGM2      | -0.0288151 | 9.638E-05 |
| ZMYM1     | 0.0379467  | 9.648E-05 |
| SLC25A1   | 0.0467238  | 9.658E-05 |
| ZFP91     | -0.1030745 | 9.699E-05 |
| WDR59     | 0.0032428  | 9.701E-05 |
| THOC5     | -0.0210533 | 9.777E-05 |
| MED4      | -0.0349981 | 9.798E-05 |
| HOOK2     | 0.0139687  | 9.802E-05 |
| NANS      | 0.1182485  | 9.838E-05 |
| ANKRD36B  | -0.0688864 | 9.882E-05 |
| C5orf56   | -0.1292282 | 9.888E-05 |
| VAMP5     | -0.06999   | 9.949E-05 |
| ATP6V1E1  | -0.0924197 | 9.98E-05  |
| C2orf68   | -0.0718913 | 0.0001001 |
| FUT4      | -0.1508097 | 0.0001002 |
| MZT1      | 0.0034959  | 0.0001005 |
| KLHL5     | -0.0463652 | 0.0001007 |
| ASPSCR1   | -0.0033991 | 0.0001007 |

|            |            |           |
|------------|------------|-----------|
| DNAJC11    | 0.010425   | 0.0001011 |
| FBXW5      | -0.0029493 | 0.0001012 |
| SLC15A4    | -0.0212296 | 0.0001023 |
| OTUD6B     | -0.081094  | 0.0001025 |
| GTPBP10    | -0.0501912 | 0.0001027 |
| UFD1       | -0.0332366 | 0.0001028 |
| ATP6V1B2   | 0.0656461  | 0.0001028 |
| DCAF17     | -0.0047356 | 0.0001028 |
| TUT7       | -0.0714017 | 0.0001031 |
| PRDX3      | -0.0072692 | 0.0001036 |
| E2F3       | -0.1260104 | 0.0001039 |
| DGCR8      | -0.0144568 | 0.0001041 |
| PRPSAP2    | -1.035E-05 | 0.0001041 |
| UBL7       | -0.0352083 | 0.0001053 |
| AC002310.1 | 0.0057259  | 0.0001053 |
| RP2        | -0.0432954 | 0.0001057 |
| UHMK1      | -0.1109409 | 0.0001059 |
| ZBTB33     | -0.0402408 | 0.0001064 |
| PAICS      | 0.108197   | 0.0001067 |
| SLC36A4    | -0.1147033 | 0.0001069 |
| SNRPA      | 0.0167     | 0.0001069 |
| SEC63      | 0.0405187  | 0.000107  |
| ATG5       | -0.0031153 | 0.0001071 |
| HDAC10     | -0.0363183 | 0.0001071 |
| MAIP1      | 0.0003308  | 0.0001073 |
| ZNF609     | -0.0923544 | 0.0001075 |
| ZMYM6      | -0.090296  | 0.000108  |
| SAP30      | 0.0458606  | 0.0001082 |
| EED        | 0.0127293  | 0.0001085 |
| IPO7       | -0.0154999 | 0.0001086 |
| RELCH      | -0.0294116 | 0.0001089 |
| CNOT3      | 0.0068316  | 0.0001092 |
| NBAS       | 0.0816102  | 0.0001092 |
| SPOUT1     | -0.0037627 | 0.0001095 |
| IKZF5      | -0.0494489 | 0.0001095 |
| PPIL4      | 0.0474837  | 0.0001097 |
| AL022311.1 | -0.0038032 | 0.0001102 |
| DDX59      | -0.0219617 | 0.0001107 |
| ENTPD6     | 0.0006451  | 0.0001108 |
| UBE2E3     | 0.0024944  | 0.0001109 |
| DCAF8      | 0.0031071  | 0.0001112 |
| GRB10      | -0.0330981 | 0.0001113 |
| PLA2G12A   | 0.0742798  | 0.0001114 |
| MAP2K7     | -0.0231121 | 0.0001116 |
| KLC1       | -0.0355529 | 0.0001119 |
| C12orf66   | -0.0108744 | 0.0001119 |
| TDP2       | 0.0104378  | 0.000112  |
| SP100      | -0.1691787 | 0.0001122 |
| TMEM41A    | -0.0130815 | 0.0001125 |
| DEXI       | -0.0223367 | 0.0001125 |

|            |            |           |
|------------|------------|-----------|
| B3GALT6    | 0.0340716  | 0.0001127 |
| RNF2       | 0.0051597  | 0.0001128 |
| EEPD1      | -0.0055075 | 0.0001129 |
| VBP1       | -0.0277199 | 0.0001133 |
| NBPF19     | -0.1139774 | 0.0001134 |
| RCN2       | -0.0345019 | 0.0001136 |
| PPP1R21    | -0.1078538 | 0.0001142 |
| STX8       | 0.0039186  | 0.0001144 |
| AC124016.2 | -0.0437258 | 0.0001149 |
| ZFYVE26    | -0.0046358 | 0.0001149 |
| KIF2A      | 0.1936755  | 0.0001156 |
| TRMT1      | -0.0059167 | 0.0001157 |
| SAC3D1     | -0.0149207 | 0.0001159 |
| SFT2D3     | -0.0104366 | 0.0001163 |
| PRKX       | -0.0060651 | 0.0001163 |
| CDC47L     | 0.0826697  | 0.0001164 |
| DIPK1B     | 0.0273957  | 0.0001166 |
| CCDC7      | -0.0123699 | 0.0001168 |
| TLE3       | -0.0429715 | 0.0001169 |
| C1QBP      | 0.2083987  | 0.0001175 |
| TMEM30A    | -0.0810297 | 0.0001176 |
| HSD17B10   | -0.0290983 | 0.0001183 |
| HMG20B     | 0.0324951  | 0.0001191 |
| CSTF1      | 0.0117588  | 0.0001193 |
| DPYD       | -0.0148074 | 0.0001197 |
| ZNF891     | -0.0376555 | 0.0001202 |
| CPSF7      | -0.0086985 | 0.0001203 |
| IMPAD1     | -0.0350647 | 0.0001204 |
| HSP90AB1   | 0.1851255  | 0.0001206 |
| LRIG2      | -0.0587777 | 0.0001206 |
| MAT2B      | -0.1529052 | 0.0001206 |
| ACAD8      | 0.0016814  | 0.0001211 |
| APOBR      | -0.0765864 | 0.0001215 |
| C12orf57   | 0.0159256  | 0.0001217 |
| CCDC82     | -0.0086865 | 0.000122  |
| CCDC32     | -0.0274354 | 0.0001221 |
| NCSTN      | -0.0398496 | 0.0001232 |
| TIMM29     | 0.0073318  | 0.0001232 |
| FTCDNL1    | -0.0516642 | 0.0001236 |
| HNRNPUL1   | 0.024636   | 0.0001236 |
| TRAPPC13   | -0.0328408 | 0.000124  |
| NDUFA10    | 0.000832   | 0.0001243 |
| PAXIP1-AS2 | -0.0236461 | 0.0001244 |
| ZNF652     | -0.0366798 | 0.0001246 |
| DPEP2      | 0.0169435  | 0.0001246 |
| RERE       | -0.0466159 | 0.0001247 |
| WBP11      | -0.0680785 | 0.0001264 |
| TPX2       | 0.106577   | 0.0001265 |
| MDC1       | -0.0030243 | 0.0001281 |
| FAM53B     | -0.0647631 | 0.0001283 |

|            |            |           |
|------------|------------|-----------|
| MALSU1     | 0.0219086  | 0.0001295 |
| DUSP11     | -0.0339362 | 0.0001298 |
| AC092329.4 | -0.0170631 | 0.0001299 |
| MKKS       | -0.0097271 | 0.0001305 |
| NUDT14     | -0.0395829 | 0.0001305 |
| CD99L2     | -0.0405253 | 0.0001307 |
| GID8       | -0.0422387 | 0.0001309 |
| CTNNBIP1   | 0.0050596  | 0.0001316 |
| TPK1       | -0.0238434 | 0.0001317 |
| EHBP1      | -0.0001786 | 0.0001322 |
| BCAS3      | -0.0493217 | 0.0001322 |
| RBM12B     | -0.0936981 | 0.0001333 |
| CR381653.1 | -0.0229891 | 0.0001335 |
| GTF2B      | -0.0017416 | 0.0001348 |
| GAR1       | 0.027494   | 0.0001349 |
| FLI1       | 0.0386907  | 0.0001351 |
| COG3       | -0.0397585 | 0.0001352 |
| MERTK      | -0.0208884 | 0.0001354 |
| VKORC1L1   | 0.0121129  | 0.0001367 |
| POLR2B     | -0.0289013 | 0.0001368 |
| ANKRD46    | -0.0369278 | 0.0001369 |
| BAG5       | 0.0377753  | 0.0001369 |
| PIGS       | -0.0131379 | 0.000137  |
| MRPS22     | 0.055597   | 0.000137  |
| GALNT11    | -0.040987  | 0.0001371 |
| SPSB2      | -0.0156456 | 0.000138  |
| METAP1D    | -0.0280046 | 0.0001381 |
| FBXW11     | -0.0258273 | 0.0001381 |
| ZNF671     | 0.0016989  | 0.0001384 |
| ZNF780B    | 0.0121752  | 0.0001402 |
| PTAR1      | -0.098952  | 0.0001403 |
| GFER       | 0.0638611  | 0.0001405 |
| WDR54      | 0.0938762  | 0.0001408 |
| CCDC189    | -0.0702127 | 0.0001416 |
| GAK        | -0.0456161 | 0.0001421 |
| ACAP2      | 0.0117601  | 0.0001422 |
| PRPF3      | -0.058846  | 0.0001425 |
| AL353807.5 | -0.0354147 | 0.0001431 |
| IFRD1      | 0.034714   | 0.0001433 |
| USP19      | -0.0234666 | 0.0001444 |
| CNPY3      | 0.1422616  | 0.0001445 |
| RNF14      | -0.0399939 | 0.0001449 |
| GGH        | 0.088717   | 0.0001451 |
| TRAF3IP2   | -0.0256434 | 0.0001451 |
| RAP1GDS1   | -0.0092198 | 0.0001454 |
| RBM6       | -0.0491451 | 0.0001459 |
| WDR46      | 0.0532678  | 0.0001459 |
| INPP5F     | -0.0402805 | 0.000146  |
| CHST11     | 0.001258   | 0.0001462 |
| ALG2       | -0.0181293 | 0.0001467 |

|            |            |           |
|------------|------------|-----------|
| TRUB2      | 0.0255611  | 0.0001467 |
| NAA60      | 8.964E-05  | 0.000148  |
| RNPC3      | -0.1122473 | 0.0001487 |
| RASA4      | -0.0083149 | 0.0001488 |
| RBM19      | -0.0207187 | 0.0001489 |
| BAK1       | -0.0209688 | 0.000149  |
| LMBR1L     | -0.0319191 | 0.000149  |
| SPINT2     | 0.183582   | 0.0001496 |
| AGO1       | -0.0943063 | 0.0001499 |
| GPSM2      | -0.1004586 | 0.0001499 |
| SCML2      | 0.1015275  | 0.0001505 |
| AL138756.1 | -0.0709304 | 0.0001512 |
| SMIM8      | -0.0539164 | 0.0001515 |
| TFDP1      | -0.0191167 | 0.0001518 |
| TMA7       | -0.1916519 | 0.000152  |
| ECD        | -0.0375114 | 0.0001521 |
| PRKAG2-AS  | 0.077555   | 0.000153  |
| ATR        | -0.1686188 | 0.0001535 |
| TXNDC15    | -0.0108368 | 0.0001535 |
| CTSZ       | 0.0743999  | 0.0001537 |
| MSL3       | -0.0409512 | 0.0001544 |
| RNMT       | -0.031194  | 0.0001552 |
| STAT5A     | -0.1388277 | 0.0001554 |
| MRFAP1     | -0.0329213 | 0.0001555 |
| HILPDA     | 0.0256922  | 0.0001557 |
| PLXNC1     | -0.1580832 | 0.0001559 |
| RBM7       | -0.0279196 | 0.0001561 |
| GNAI3      | 0.0182471  | 0.0001568 |
| UBL3       | -0.0085932 | 0.0001573 |
| AP4M1      | -0.0160273 | 0.0001575 |
| NAA15      | 0.0373138  | 0.0001579 |
| IPO5       | 0.0269388  | 0.0001586 |
| TCP1       | 0.0772223  | 0.0001594 |
| UHL3       | 0.001805   | 0.0001617 |
| CHAMP1     | 0.0019796  | 0.0001619 |
| PLXND1     | 0.1354638  | 0.0001625 |
| AKT2       | 0.0271256  | 0.0001634 |
| NBPF14     | -0.0839932 | 0.0001636 |
| SPRYD4     | -0.0310259 | 0.0001639 |
| TOMM5      | 0.1332587  | 0.0001639 |
| TNFRSF1B   | 0.118565   | 0.0001641 |
| UBE2N      | 0.0379205  | 0.0001649 |
| PLTP       | 0.0624031  | 0.000165  |
| SMARCAL1   | -0.015598  | 0.0001653 |
| MSH6       | 0.0516125  | 0.0001657 |
| STXBP4     | -0.0727858 | 0.000166  |
| DCAF13     | 0.0335751  | 0.0001663 |
| TARDBP     | -0.0772197 | 0.0001667 |
| CPLANE1    | -0.0501909 | 0.0001668 |
| HESX1      | -0.0087225 | 0.0001671 |

|            |            |           |
|------------|------------|-----------|
| FAHD2B     | 0.0118852  | 0.0001675 |
| ZNF26      | -0.0902586 | 0.0001675 |
| STT3A      | -0.0345093 | 0.0001678 |
| DNAJB11    | 0.0406629  | 0.000168  |
| MYL6       | 0.1781507  | 0.000168  |
| QRICH1     | -0.0372748 | 0.0001684 |
| LRRFIP2    | -0.0191381 | 0.0001696 |
| TMX3       | -0.0897805 | 0.0001707 |
| HSPA1A     | -0.0333853 | 0.000172  |
| FARSB      | 0.0051267  | 0.0001727 |
| PPP1R18    | 0.0759331  | 0.0001733 |
| FAM13B     | -0.053446  | 0.0001743 |
| BCL10      | -0.0518421 | 0.0001743 |
| RPE        | -0.0376652 | 0.0001746 |
| ODR4       | -0.0386266 | 0.0001748 |
| NAT10      | 0.0445638  | 0.0001748 |
| AC093297.2 | -0.0424073 | 0.0001752 |
| AL513128.2 | -0.0289054 | 0.0001753 |
| DNPEP      | -0.0011042 | 0.0001761 |
| ODC1       | 0.0975105  | 0.0001769 |
| TIPRL      | 0.0298492  | 0.0001773 |
| MKRN1      | 0.0094641  | 0.0001773 |
| FASTKD3    | -0.018553  | 0.0001778 |
| NUTF2      | -0.053659  | 0.0001785 |
| SPSB3      | -0.0372648 | 0.0001787 |
| RABIF      | 0.0207769  | 0.0001793 |
| C12orf10   | 0.0793901  | 0.0001795 |
| NUDT2      | 0.0078584  | 0.0001797 |
| ACYP2      | -0.095615  | 0.0001797 |
| TMEM87B    | -0.0195256 | 0.0001798 |
| FYCO1      | 0.002042   | 0.0001803 |
| ARMC8      | -0.0526406 | 0.0001803 |
| NUCB2      | 0.2088578  | 0.0001814 |
| SH3GLB2    | -0.0074823 | 0.0001822 |
| FKBP3      | 0.0882518  | 0.0001833 |
| EEF2       | -0.102136  | 0.0001839 |
| RICTOR     | -0.1130045 | 0.000184  |
| C11orf68   | -0.0513384 | 0.0001841 |
| HIF1A      | 0.1320845  | 0.0001842 |
| TRGC2      | 0.1025796  | 0.0001843 |
| P2RX4      | -0.0996615 | 0.0001848 |
| TPRG1L     | 0.0070425  | 0.0001848 |
| MAPKAP1    | -0.0323489 | 0.000185  |
| NAPRT      | 0.1009257  | 0.0001851 |
| MAN2B1     | -0.021166  | 0.0001865 |
| UCKL1      | -0.0122313 | 0.000187  |
| TRIM13     | -0.0936956 | 0.0001871 |
| TSR3       | 0.0222958  | 0.0001885 |
| GTF2F1     | 0.0287691  | 0.000189  |
| GTF2E2     | -0.008929  | 0.0001891 |

|            |            |           |
|------------|------------|-----------|
| KDM2B      | -0.0606113 | 0.0001896 |
| ACBD6      | 0.0517366  | 0.0001908 |
| AC142472.1 | -0.0542651 | 0.0001925 |
| USF3       | -0.0535167 | 0.0001947 |
| ADPRM      | 0.0066139  | 0.0001949 |
| CYC1       | 0.077913   | 0.0001956 |
| PBXIP1     | 0.0130669  | 0.000196  |
| AC139099.2 | 0.1092579  | 0.0001961 |
| UBAP2L     | -0.0203692 | 0.0001978 |
| CPSF4      | 0.0096862  | 0.0001986 |
| MKNK2      | -0.0768567 | 0.0002007 |
| LIG1       | 0.0508231  | 0.0002032 |
| PANK3      | -0.0958289 | 0.0002034 |
| PAQR7      | -0.0473209 | 0.0002038 |
| MRPL46     | -0.0116429 | 0.0002041 |
| UQCC1      | -0.0164718 | 0.0002041 |
| WDR82      | -0.0662406 | 0.0002042 |
| NDUFA9     | 0.0212222  | 0.0002046 |
| IMPA1      | -0.0293401 | 0.0002051 |
| HAX1       | 0.0616398  | 0.0002053 |
| UBP1       | -0.0248232 | 0.0002059 |
| ACSS1      | 0.0550305  | 0.0002062 |
| MEIS1-AS2  | -0.0262836 | 0.0002063 |
| ZG16B      | 0.1020833  | 0.0002066 |
| FLCN       | -0.0479945 | 0.0002067 |
| BAG1       | -0.0403084 | 0.0002071 |
| BTBD2      | 0.002943   | 0.0002074 |
| SCAND1     | 0.0675647  | 0.0002075 |
| PTP4A3     | 0.1176085  | 0.0002077 |
| AC127521.1 | 0.0403953  | 0.0002087 |
| SDHD       | -0.0305426 | 0.000209  |
| PPM1B      | -0.0364673 | 0.000209  |
| CYTH2      | 0.0219475  | 0.0002105 |
| ERF        | -0.1096582 | 0.0002117 |
| AC008764.8 | -0.0217624 | 0.0002119 |
| PITPNA-AS1 | 0.0510867  | 0.0002125 |
| SOCS7      | -0.0336395 | 0.0002127 |
| CARHSP1    | 0.1098541  | 0.0002132 |
| POLB       | 0.002675   | 0.0002133 |
| ABCF2      | 0.0085667  | 0.0002136 |
| BTBD7      | -0.0608208 | 0.000215  |
| DLG5       | -0.0345301 | 0.0002151 |
| DNAJC10    | -0.1454628 | 0.0002152 |
| C1orf122   | 0.0119449  | 0.0002154 |
| ELMOD2     | -0.0663779 | 0.0002163 |
| HLTF       | -0.032901  | 0.0002167 |
| MARK3      | -0.0586498 | 0.0002167 |
| NPRL2      | -0.0154325 | 0.0002178 |
| PPP1R3D    | 0.0127904  | 0.0002178 |
| PLRG1      | -0.0448511 | 0.0002183 |

|            |            |           |
|------------|------------|-----------|
| FYTTD1     | -0.1261569 | 0.0002185 |
| COA1       | -0.0648552 | 0.0002189 |
| CLASP2     | -0.0702263 | 0.000219  |
| PDCD7      | 0.1214933  | 0.0002197 |
| ZNF274     | -0.007012  | 0.0002199 |
| ATP7A      | -0.0623707 | 0.0002207 |
| ERP44      | 0.0161005  | 0.0002211 |
| MAFK       | 0.0496499  | 0.0002214 |
| MRPS18A    | -0.0034127 | 0.0002214 |
| PRMT9      | -0.0409759 | 0.0002217 |
| AC004865.2 | 0.0815849  | 0.0002219 |
| MRPL14     | 0.0285325  | 0.0002219 |
| NHLRC2     | -0.1058499 | 0.0002226 |
| VAPB       | 0.0044727  | 0.0002242 |
| NIFK-AS1   | 0.0177686  | 0.0002256 |
| MTRES1     | 0.0511889  | 0.0002277 |
| SFXN3      | 0.0045678  | 0.0002313 |
| BACE1-AS   | -0.0490312 | 0.000233  |
| HINFP      | -0.0538174 | 0.0002336 |
| ACP1       | 0.0125887  | 0.0002347 |
| TMED8      | 0.0425614  | 0.0002348 |
| PSMD6      | -0.0124323 | 0.000235  |
| STRN4      | -0.0080799 | 0.0002354 |
| RNF5       | -0.0722062 | 0.0002356 |
| POLR2E     | -0.0306701 | 0.0002367 |
| UNC13D     | -0.0238396 | 0.0002369 |
| HMOX2      | 0.020662   | 0.000237  |
| LAS1L      | 0.0403692  | 0.000237  |
| TMEM218    | -0.0107287 | 0.000237  |
| REV1       | -0.0036273 | 0.0002374 |
| SMIM4      | -0.0598089 | 0.0002379 |
| POMGNT1    | -0.012223  | 0.0002384 |
| SLC25A46   | -0.0877357 | 0.0002384 |
| INTS10     | 0.0169373  | 0.0002391 |
| FAM20B     | -0.0736987 | 0.0002407 |
| TPCN1      | -0.1027122 | 0.0002416 |
| PDCL       | -0.0650504 | 0.0002434 |
| TRIM68     | -0.0103375 | 0.0002435 |
| TMEM8A     | -0.0186569 | 0.0002436 |
| MPV17      | 0.02377    | 0.0002444 |
| MOB3A      | -0.056713  | 0.000245  |
| CDK19      | -0.0821839 | 0.0002453 |
| PIK3R4     | 0.0123905  | 0.0002456 |
| ARPP19     | -0.1025779 | 0.0002464 |
| RNF40      | -0.0159717 | 0.0002468 |
| TMEM71     | 0.1035092  | 0.0002478 |
| KAT7       | -0.079225  | 0.0002486 |
| PEF1       | -0.0019977 | 0.0002516 |
| ARNT       | -0.0413446 | 0.000252  |
| NSMCE3     | -0.0140145 | 0.0002523 |



|            |            |           |
|------------|------------|-----------|
| CHPT1      | -0.0947207 | 0.0002527 |
| SLC35D1    | -0.0153652 | 0.0002533 |
| EML3       | -0.018407  | 0.0002537 |
| TBC1D13    | 0.0346604  | 0.0002539 |
| ST6GALNAC  | 0.0827177  | 0.0002546 |
| ARIH1      | -0.0501443 | 0.0002552 |
| PEX3       | -0.0176275 | 0.0002554 |
| CLIP4      | -0.0287511 | 0.0002561 |
| CEP85      | -0.0291866 | 0.0002566 |
| SLC30A6    | -0.0182461 | 0.0002585 |
| TAF2       | -0.017261  | 0.0002589 |
| DDX20      | -0.0364215 | 0.0002592 |
| SAT1       | 0.2497833  | 0.00026   |
| BRD3       | -0.0854662 | 0.0002606 |
| FBXO4      | 0.0179069  | 0.0002608 |
| SLBP       | 0.0960327  | 0.0002608 |
| COL24A1    | 0.1238494  | 0.0002618 |
| OSBPL2     | -0.0443208 | 0.0002619 |
| DYNLL1     | 0.2156057  | 0.000262  |
| PPM1M      | -0.0513795 | 0.000264  |
| RBM14      | 0.0675526  | 0.0002645 |
| ANKZF1     | 0.0144912  | 0.0002651 |
| NUS1       | -0.0346274 | 0.0002657 |
| ABHD18     | -0.0425868 | 0.0002658 |
| RHOG       | -0.1180573 | 0.0002672 |
| TBC1D10C   | 0.0565201  | 0.0002677 |
| AGAP5      | -0.0283998 | 0.0002678 |
| ZNF7       | -0.0443839 | 0.0002681 |
| YME1L1     | -0.0924928 | 0.0002685 |
| PCGF3      | -0.0381896 | 0.0002685 |
| TIA1       | -0.1325582 | 0.0002685 |
| RIOK1      | -0.0114832 | 0.0002691 |
| ZNRD1      | 0.0784095  | 0.0002697 |
| FASTKD2    | -0.0197328 | 0.0002698 |
| CBX1       | -0.0501614 | 0.00027   |
| C2CD2      | 0.0202737  | 0.0002701 |
| IFT20      | 0.0033053  | 0.0002706 |
| SPAG16     | 0.0808616  | 0.0002719 |
| ASRGL1     | -0.0391879 | 0.000272  |
| MAGED2     | -0.0035216 | 0.0002722 |
| FUT10      | 0.025161   | 0.0002729 |
| TMEM184C   | -0.0732882 | 0.0002738 |
| RBBP7      | -0.0048176 | 0.0002743 |
| SPCS3      | -0.0159713 | 0.000275  |
| PLCB1      | 0.1155335  | 0.0002773 |
| GALT       | -0.0113228 | 0.0002804 |
| ARHGAP35   | 0.0010059  | 0.000281  |
| MGAT1      | -0.0185698 | 0.0002816 |
| AL390728.5 | -0.0403299 | 0.0002819 |
| OTUD5      | 0.0327575  | 0.0002826 |

|          |            |           |
|----------|------------|-----------|
| CAPN1    | 0.0126819  | 0.000283  |
| ZXDC     | -0.0721853 | 0.0002834 |
| ERCC3    | -0.0199841 | 0.0002836 |
| DBP      | -0.025461  | 0.0002842 |
| LTBP3    | 0.0371592  | 0.0002842 |
| AP2B1    | -0.0481354 | 0.0002843 |
| LSM12    | -0.0027975 | 0.000285  |
| TMA16    | -0.0575536 | 0.0002851 |
| GGA2     | 0.005413   | 0.0002851 |
| FAM217B  | -0.0328202 | 0.000287  |
| HSPA13   | -0.0224169 | 0.0002879 |
| RAB6A    | -0.0394105 | 0.0002892 |
| CCNK     | -0.013319  | 0.0002896 |
| FAM122A  | -0.0070426 | 0.0002916 |
| ATP6V1H  | -0.0363522 | 0.000292  |
| PRKCD    | -0.0759031 | 0.0002922 |
| SLC35F2  | -0.0281689 | 0.0002933 |
| TMED9    | -0.0092417 | 0.0002935 |
| ESYT1    | -0.1012115 | 0.0002947 |
| ZBTB5    | 0.0027317  | 0.0002953 |
| CUL4A    | -0.0607985 | 0.0002964 |
| DIP2B    | -0.0534857 | 0.0002965 |
| C17orf80 | -0.0417849 | 0.0002967 |
| DPH5     | -0.0347442 | 0.0002976 |
| BOP1     | 0.0173495  | 0.0002978 |
| PEX5     | -0.0150144 | 0.000298  |
| PGD      | -0.0666969 | 0.0002981 |
| RPUSD4   | -0.0274428 | 0.0002983 |
| RMDN1    | 0.0094521  | 0.0002988 |
| VAMP2    | 0.0943096  | 0.0002988 |
| UVSSA    | -0.0355434 | 0.0002989 |
| SAP30BP  | -0.0328601 | 0.0002994 |
| CAT      | -0.2302435 | 0.0003015 |
| FAM106A  | -0.0221123 | 0.0003027 |
| PHKB     | -0.0868899 | 0.0003029 |
| C5orf15  | -0.0765188 | 0.000303  |
| AASDH    | 0.00814    | 0.0003031 |
| PDRG1    | 0.0079924  | 0.0003031 |
| CEP70    | -0.0418348 | 0.0003042 |
| ACSL3    | -0.0609971 | 0.0003045 |
| SPPL2A   | -0.0625732 | 0.0003103 |
| HAUS2    | -0.0395122 | 0.0003118 |
| CCDC126  | -0.0341619 | 0.0003123 |
| ATXN3    | -0.0856319 | 0.0003136 |
| SMARCB1  | -0.0677596 | 0.0003142 |
| FGD5-AS1 | -0.0468045 | 0.0003144 |
| TMEM134  | 0.0964993  | 0.0003169 |
| UMAD1    | -0.0089913 | 0.000318  |
| CTNNAL1  | -0.0052541 | 0.0003183 |
| OSBPL9   | -0.0081535 | 0.0003188 |

|           |            |           |
|-----------|------------|-----------|
| ZNF689    | 0.0110604  | 0.0003194 |
| SETD5     | -0.0643896 | 0.0003199 |
| ERI1      | 0.0510743  | 0.0003202 |
| RNF168    | -0.047049  | 0.0003206 |
| GTF2F2    | 0.0288133  | 0.0003207 |
| TBC1D23   | -0.029966  | 0.0003212 |
| RABGAP1   | -0.0126345 | 0.0003214 |
| TTYH3     | -0.0517717 | 0.0003219 |
| ACPP      | -0.0030787 | 0.0003235 |
| GALNT4    | 0.0661626  | 0.0003236 |
| COPZ1     | -0.0109794 | 0.0003246 |
| TTBK2     | -0.0529024 | 0.0003254 |
| RNF167    | 0.0843728  | 0.0003255 |
| SUSD1     | -0.040611  | 0.0003257 |
| DEGS1     | -0.0368461 | 0.000326  |
| GPR89A    | -0.0614349 | 0.000326  |
| DPY19L3   | -0.0647363 | 0.0003264 |
| ANAPC15   | 0.0301289  | 0.0003269 |
| ADGRA3    | -0.041938  | 0.0003275 |
| NDUFB6    | -0.0390031 | 0.0003293 |
| VIRMA     | 0.0422787  | 0.0003294 |
| QPCTL     | -0.0183702 | 0.0003296 |
| ABHD13    | -0.0196049 | 0.0003297 |
| HDAC5     | 0.0122796  | 0.000333  |
| SAMD1     | -0.0730498 | 0.0003334 |
| NRSN2-AS1 | 0.0216882  | 0.0003339 |
| GFI1      | -0.0599917 | 0.0003345 |
| MCM2      | 0.0613701  | 0.0003346 |
| IKZF1     | -0.1780535 | 0.0003351 |
| TMED2-DT  | -0.0368918 | 0.0003367 |
| ASB7      | -0.0256079 | 0.0003371 |
| RUFY1     | 0.1430592  | 0.0003382 |
| CLK4      | -0.0958864 | 0.0003396 |
| TERF2IP   | 0.1362265  | 0.0003423 |
| CPNE2     | 0.0993901  | 0.0003425 |
| C9orf43   | 0.0307527  | 0.0003449 |
| POLR3A    | -0.0205627 | 0.0003458 |
| EAPP      | 0.0090416  | 0.0003462 |
| RTN4      | 0.1686786  | 0.0003471 |
| CCDC18-AS | -0.0036776 | 0.0003472 |
| LETMD1    | -0.0788458 | 0.0003486 |
| STRADA    | -0.0362619 | 0.0003488 |
| FBXL15    | 0.0759193  | 0.0003488 |
| USP9X     | -0.0504623 | 0.0003497 |
| GBP3      | -0.0492726 | 0.0003506 |
| ZNF493    | -0.1327611 | 0.0003506 |
| AP1S2     | -0.1536997 | 0.0003507 |
| LRCH3     | -0.072044  | 0.0003509 |
| AHCY      | 0.0309297  | 0.0003511 |
| NKIRAS2   | -0.0077504 | 0.0003519 |

|            |            |           |
|------------|------------|-----------|
| XPOT       | -0.11155   | 0.0003537 |
| UBE2L3     | 0.0937672  | 0.0003537 |
| HAUS3      | -0.0330094 | 0.000355  |
| FAM120AOS  | 0.0027756  | 0.0003552 |
| XRCC6      | 0.0568602  | 0.0003559 |
| ATP11B     | -0.0698354 | 0.0003565 |
| PMS1       | 0.0319701  | 0.0003577 |
| SDF2L1     | 0.0674421  | 0.0003579 |
| PIK3CG     | 0.0514315  | 0.0003609 |
| SMU1       | -0.0520341 | 0.0003611 |
| OSGIN2     | -0.0462538 | 0.0003615 |
| COA8       | 0.0550055  | 0.0003618 |
| AC093627.4 | -0.0298125 | 0.0003622 |
| NUDT21     | 0.0165619  | 0.0003623 |
| CAPZB      | -0.0458086 | 0.0003624 |
| NDUFB2     | 0.1237466  | 0.0003626 |
| EBPL       | 0.1105798  | 0.000363  |
| TPGS2      | 0.0111267  | 0.0003635 |
| TMEM126B   | -0.0350369 | 0.0003639 |
| GTF3C3     | -0.0287784 | 0.0003644 |
| VPS16      | -0.0038919 | 0.0003663 |
| STRIP1     | -0.022167  | 0.0003666 |
| C1orf216   | -0.0510776 | 0.0003681 |
| STAP1      | 0.1055436  | 0.0003696 |
| B4GALT4    | -0.0165345 | 0.0003699 |
| AHDC1      | 0.0717423  | 0.0003708 |
| ZSCAN12    | -0.034702  | 0.0003708 |
| DCXR       | -0.0539232 | 0.0003711 |
| AGO4       | -0.034545  | 0.0003726 |
| PFDN6      | -0.0033586 | 0.000373  |
| WDR43      | -0.0321055 | 0.0003734 |
| PHF1       | -0.0078307 | 0.0003744 |
| UBIAD1     | 0.0395104  | 0.0003748 |
| KLF3-AS1   | 0.0349529  | 0.0003754 |
| ATP11C     | -0.0105809 | 0.0003772 |
| IFT52      | -0.0527178 | 0.0003772 |
| TAMM41     | -0.0273695 | 0.0003782 |
| CDK5       | -0.0100192 | 0.0003793 |
| OMA1       | -0.0956123 | 0.0003801 |
| THUMPD3    | -0.0183954 | 0.0003802 |
| POLR2G     | -0.0661708 | 0.0003802 |
| ING4       | -0.0556685 | 0.0003815 |
| SRCAP      | -0.0249452 | 0.000383  |
| DNAJC19    | 0.0834923  | 0.0003833 |
| IFT43      | 0.015408   | 0.0003846 |
| IKBKE      | 0.0327255  | 0.0003851 |
| ILKAP      | -0.0747238 | 0.000386  |
| FEM1B      | -0.0331285 | 0.0003867 |
| AC245060.6 | -0.0176006 | 0.0003881 |
| AC103702.1 | -0.1301787 | 0.000389  |

|            |            |           |
|------------|------------|-----------|
| POLR3C     | -0.0523221 | 0.0003922 |
| LLPH       | -0.1464356 | 0.0003923 |
| LRPPRC     | -0.0726401 | 0.0003929 |
| NOCT       | -0.0499297 | 0.0003958 |
| NANP       | 0.0118653  | 0.0003966 |
| MRPL34     | -0.0413337 | 0.0003977 |
| PLSCR3     | 0.0006154  | 0.000398  |
| LRRC58     | -0.0713189 | 0.0003987 |
| VAV3       | 0.0546544  | 0.0003991 |
| TMTC4      | -0.0252273 | 0.0004    |
| ZNF429     | -0.0482819 | 0.0004011 |
| COPS3      | 0.0496515  | 0.0004026 |
| GSEC       | -0.0512791 | 0.0004036 |
| DDX58      | -0.0462204 | 0.0004056 |
| CTDSPL2    | -0.0056438 | 0.0004063 |
| GLT8D1     | -0.0137581 | 0.0004072 |
| KEAP1      | -0.0106051 | 0.0004073 |
| AL096870.8 | -0.0806701 | 0.0004078 |
| ME2        | 0.0147054  | 0.0004079 |
| ZNF417     | -0.0492522 | 0.0004083 |
| ZNF3       | 0.0276138  | 0.0004086 |
| ZFYVE27    | -0.0411255 | 0.0004098 |
| PPP2CB     | -0.0089356 | 0.0004103 |
| ZNF117     | -0.0849301 | 0.0004107 |
| DDX19B     | -0.026322  | 0.000413  |
| MED6       | -0.0037092 | 0.0004134 |
| TPRA1      | -0.0141526 | 0.0004139 |
| MRPL2      | -0.0099073 | 0.0004152 |
| ARID3A     | -0.1299404 | 0.0004162 |
| PMPCB      | -0.0550818 | 0.0004165 |
| IDH3G      | 0.0130676  | 0.0004166 |
| ERLIN2     | 0.0261636  | 0.0004171 |
| CDK17      | -0.011849  | 0.0004174 |
| ILVBL      | 0.0231444  | 0.0004174 |
| SMARCAD1   | -0.0615507 | 0.000418  |
| ANO6       | -0.0623696 | 0.0004195 |
| CCDC180    | -0.0174152 | 0.0004198 |
| CASP3      | 0.0029044  | 0.0004226 |
| PPP1R3F    | -0.0139132 | 0.0004246 |
| RSBN1L     | 0.1471583  | 0.0004273 |
| OGFR       | -0.0706992 | 0.0004283 |
| HIP1R      | -0.0257043 | 0.000429  |
| TMOD3      | -0.030014  | 0.0004299 |
| RGL2       | 0.0732438  | 0.0004299 |
| IRF2BP1    | -0.0082661 | 0.0004304 |
| SMS        | 0.0817915  | 0.0004312 |
| ATP6V1A    | 0.0225795  | 0.0004337 |
| AC016876.1 | -0.0280666 | 0.0004345 |
| TMPO       | 0.1339467  | 0.0004357 |
| GLRX5      | 0.0326372  | 0.0004361 |

|            |            |           |
|------------|------------|-----------|
| PLEKHF2    | -0.035126  | 0.0004366 |
| KRBA2      | 0.0358038  | 0.0004369 |
| ZNF776     | -0.0112566 | 0.0004392 |
| ATG101     | 0.0454928  | 0.0004393 |
| NT5C3A     | -0.0783774 | 0.0004419 |
| DFFB       | -0.0185347 | 0.000442  |
| TAS2R4     | -0.0444317 | 0.0004422 |
| SIKE1      | -0.0519417 | 0.0004431 |
| ADD1       | 0.0553802  | 0.0004446 |
| ZNF709     | 0.0092802  | 0.0004466 |
| D2HGDH     | -0.0113401 | 0.000448  |
| ZBTB37     | -0.0205758 | 0.0004488 |
| AC011477.2 | -0.0229447 | 0.0004498 |
| NAPEPLD    | -0.0532733 | 0.0004508 |
| BAD        | 0.0101404  | 0.000451  |
| MTFR1L     | 0.0207113  | 0.0004515 |
| NOLC1      | 0.0537784  | 0.0004527 |
| MIF4GD     | 0.0027909  | 0.0004534 |
| KIF9       | 0.0870616  | 0.0004572 |
| ANTKMT     | 0.0975396  | 0.0004591 |
| CDC16      | -0.0339391 | 0.0004603 |
| AGFG1      | -0.0375579 | 0.0004617 |
| ZNF674-AS1 | -0.0262873 | 0.000462  |
| ZDHHC24    | 0.061168   | 0.0004629 |
| SHARPIN    | 0.0052868  | 0.0004631 |
| CETN2      | -0.0447191 | 0.0004633 |
| ATXN10     | -0.0095455 | 0.0004642 |
| IARS       | 0.0255035  | 0.0004644 |
| TSPAN4     | 0.0923791  | 0.0004648 |
| FIBP       | 0.0952722  | 0.0004675 |
| ACLY       | -0.0331224 | 0.0004703 |
| CMPK1      | -0.104866  | 0.0004709 |
| SATB1      | -0.0190703 | 0.0004731 |
| DCUN1D4    | -0.0267622 | 0.0004741 |
| ZKSCAN4    | -0.0347008 | 0.0004752 |
| IMPA2      | -0.0102382 | 0.0004753 |
| CRYBG1     | 0.1147867  | 0.0004763 |
| TAPT1      | -0.0363799 | 0.0004764 |
| POP7       | 0.0341716  | 0.0004777 |
| ZSWIM7     | -0.1048328 | 0.0004788 |
| POGLUT1    | -0.0500631 | 0.0004804 |
| ITFG1      | -0.0476568 | 0.0004806 |
| ADK        | -0.158463  | 0.0004816 |
| OS9        | -0.0972422 | 0.0004828 |
| RPA1       | 0.0129092  | 0.0004832 |
| NFIX       | -0.0212781 | 0.0004867 |
| WDTC1      | -0.0221216 | 0.0004878 |
| FERMT3     | 0.1289079  | 0.0004883 |
| RNASEH2A   | -0.0317859 | 0.0004902 |
| PTRH1      | 0.0445573  | 0.0004902 |

|            |            |           |
|------------|------------|-----------|
| WDR48      | 0.0063423  | 0.0004944 |
| SSH3       | -0.0113772 | 0.0004991 |
| PPP6C      | -0.0123933 | 0.0005039 |
| PKN2       | -0.0662489 | 0.000508  |
| SFT2D1     | -0.0565039 | 0.0005085 |
| CAMTA1     | 0.0184157  | 0.0005086 |
| DISC1      | 0.0207517  | 0.0005106 |
| PEPD       | -0.0203253 | 0.0005108 |
| SPAG7      | 0.029152   | 0.0005113 |
| PRR11      | -0.0503963 | 0.0005119 |
| RHBDD2     | -0.0468957 | 0.0005121 |
| ABHD17A    | 0.0672019  | 0.0005141 |
| AC006064.4 | -0.0214638 | 0.0005142 |
| MFSD4B     | -0.1241799 | 0.0005153 |
| LYSMD2     | -0.0965679 | 0.0005185 |
| AL031595.2 | -0.035323  | 0.0005198 |
| WASL       | 0.025176   | 0.0005198 |
| BCL11A     | 0.1822101  | 0.0005203 |
| HMGXB3     | 0.0481935  | 0.0005206 |
| HRH2       | 0.1101575  | 0.0005214 |
| POM121C    | -0.0235327 | 0.0005225 |
| NFE2L2     | -0.1184602 | 0.0005226 |
| SKP1       | -0.1391512 | 0.0005235 |
| TTLL4      | -0.0162717 | 0.000525  |
| ENTPD1-AS  | 0.0156921  | 0.0005277 |
| METTL21A   | -0.0018737 | 0.0005312 |
| FAM174C    | 0.047694   | 0.0005332 |
| AL121933.2 | 0.0625475  | 0.0005333 |
| CCNH       | -0.0363624 | 0.0005335 |
| LARP4B     | -0.0858365 | 0.0005366 |
| DNAJC15    | 0.1157415  | 0.0005373 |
| SDF2       | -0.0140782 | 0.0005391 |
| ZNF24      | 0.0160036  | 0.0005404 |
| RNF123     | -0.0348718 | 0.0005412 |
| RBM17      | 0.0772918  | 0.0005429 |
| CAVIN2     | 0.1444694  | 0.0005477 |
| SCAMP4     | -0.0148664 | 0.0005479 |
| CBFA2T2    | -0.0762929 | 0.0005488 |
| PAGR1      | 0.0238018  | 0.0005538 |
| MFSD8      | -0.0603662 | 0.0005551 |
| TMX1       | -0.0254504 | 0.0005559 |
| PLPP6      | -0.0358161 | 0.000556  |
| GPSM1      | 0.0825     | 0.0005574 |
| ZNF121     | -0.0180613 | 0.0005577 |
| MXI1       | 0.0189192  | 0.0005593 |
| ZDHHC9     | 0.0267932  | 0.0005656 |
| ALAD       | -0.0529625 | 0.0005661 |
| PRKAR1A    | -0.0979161 | 0.0005674 |
| QARS       | -0.003217  | 0.0005684 |
| ILF3-DT    | 0.017771   | 0.0005707 |

|            |            |           |
|------------|------------|-----------|
| ZC3H12C    | 0.0466716  | 0.0005728 |
| PMS2       | -0.0959517 | 0.0005736 |
| TRAPPC2B   | 0.0508952  | 0.0005765 |
| BST1       | 0.0823886  | 0.0005809 |
| AL499604.1 | 0.1024255  | 0.000584  |
| TAS2R14    | -0.040341  | 0.0005861 |
| CEP120     | -0.0654462 | 0.0005863 |
| RPN1       | -0.0040145 | 0.0005874 |
| MALT1      | 0.0078085  | 0.0005881 |
| MFSD14B    | -0.0474834 | 0.0005886 |
| CDYL2      | 0.0020494  | 0.0005887 |
| APOBEC3G   | 0.0262648  | 0.0005896 |
| PPAN       | 0.0345893  | 0.0005907 |
| SLC2A5     | -0.1037693 | 0.0005923 |
| RAVER1     | 0.0110529  | 0.0005927 |
| HYMAI      | 0.0714187  | 0.0005935 |
| FOXP1-IT1  | 0.0294553  | 0.0005938 |
| INTS4      | -0.0434914 | 0.0005961 |
| SLC27A5    | 0.0653818  | 0.0005968 |
| ZNF579     | 0.0315615  | 0.0006022 |
| SGPL1      | -0.0055249 | 0.0006023 |
| TBCCD1     | -0.0328902 | 0.0006062 |
| RPF1       | -0.0091303 | 0.0006063 |
| SLC38A7    | -0.0239954 | 0.0006067 |
| NEPRO      | -0.0549071 | 0.0006094 |
| FAM50B     | 0.0369689  | 0.0006094 |
| SUCLG2     | -0.0287897 | 0.0006114 |
| WTAP       | -0.0792194 | 0.0006115 |
| UBXN2B     | -0.075376  | 0.000612  |
| TSPOAP1    | -0.0224938 | 0.0006142 |
| TP53BP2    | -0.0212415 | 0.0006162 |
| TAF1D      | -0.2184563 | 0.000618  |
| ZNF330     | -0.0321743 | 0.0006181 |
| UBE2E1     | -0.0038568 | 0.0006182 |
| HCLS1      | 0.0592443  | 0.0006188 |
| SLC25A17   | -0.0238782 | 0.0006198 |
| TAF1       | -0.0723493 | 0.0006207 |
| WDR6       | -0.0281121 | 0.0006208 |
| TUBD1      | 0.0058433  | 0.000622  |
| POLR2A     | -0.0532001 | 0.0006228 |
| CYP20A1    | -0.0482133 | 0.0006228 |
| MBOAT7     | 0.1383727  | 0.0006254 |
| MTCL1      | -0.0450953 | 0.0006265 |
| ZC3H3      | -0.0216528 | 0.0006275 |
| RNF138     | -0.0126968 | 0.0006326 |
| CENPH      | 0.0530227  | 0.0006351 |
| DEAF1      | -0.0065493 | 0.0006364 |
| RWDD4      | 0.020535   | 0.0006366 |
| ZNF785     | -0.0886773 | 0.000637  |
| CPTP       | 0.0029396  | 0.0006374 |



|         |            |           |
|---------|------------|-----------|
| SH2B3   | 0.0209501  | 0.0006378 |
| KIF21B  | -0.0333688 | 0.000638  |
| SPTSSA  | -0.0901439 | 0.0006397 |
| BACH1   | -0.0372254 | 0.0006402 |
| TMLHE   | 0.0091328  | 0.0006424 |
| USP25   | -0.0367185 | 0.0006427 |
| NADK2   | -0.0437614 | 0.0006429 |
| TEC     | 0.1476935  | 0.0006495 |
| DYNLL2  | 0.0215116  | 0.0006506 |
| L2HGDH  | -0.0543244 | 0.0006571 |
| ANKHD1  | -0.0912803 | 0.0006585 |
| INPP4B  | 0.1357744  | 0.000659  |
| BRCC3   | 0.0388846  | 0.00066   |
| CKAP5   | 0.0044505  | 0.0006621 |
| HMGCL   | -0.0234193 | 0.0006623 |
| B3GNTL1 | -0.0294359 | 0.0006634 |
| LRBA    | 0.0691376  | 0.0006639 |
| TMEM35B | 0.0102999  | 0.0006646 |
| STX6    | -0.0332981 | 0.0006656 |
| AP5M1   | -0.0879588 | 0.0006657 |
| FNDC3A  | -0.0283402 | 0.0006663 |
| GPX7    | 0.0491384  | 0.0006697 |
| TLL3    | -0.0013408 | 0.0006703 |
| FAM98A  | 0.0106605  | 0.0006714 |
| KRBOX4  | -0.0277631 | 0.0006716 |
| CEP44   | -0.0376579 | 0.0006718 |
| SMAD5   | -0.0980404 | 0.0006733 |
| ZNF500  | -0.0072734 | 0.0006734 |
| TGIF2   | 0.0478203  | 0.0006747 |
| FANCF   | 0.0126684  | 0.0006772 |
| SH3KBP1 | -0.1560361 | 0.0006842 |
| PTGIR   | 0.0771505  | 0.0006846 |
| PBDC1   | 0.0503451  | 0.0006852 |
| CCDC6   | 0.0294913  | 0.0006866 |
| LTBR    | -0.0360789 | 0.0006905 |
| PCNX1   | -0.1051645 | 0.000692  |
| TM9SF1  | 0.030615   | 0.0006926 |
| DDX5    | 0.1907904  | 0.0006928 |
| P2RY11  | -0.1003857 | 0.0006948 |
| NPLOC4  | -0.0371487 | 0.0006959 |
| ZNF639  | 0.0140193  | 0.0006962 |
| FLII    | -0.0334147 | 0.0006971 |
| BCCIP   | -0.0444592 | 0.0006976 |
| SPIDR   | -0.0394017 | 0.000698  |
| CTBP2   | -0.0175149 | 0.000698  |
| RITA1   | 0.0083333  | 0.000698  |
| GPM6B   | -0.0208665 | 0.0006994 |
| CYREN   | -0.044955  | 0.0006997 |
| YARS2   | 0.0076695  | 0.0007    |
| ZNF281  | -0.0379414 | 0.0007022 |

|           |            |           |
|-----------|------------|-----------|
| IMP4      | 0.052146   | 0.0007028 |
| RPS6KA4   | -0.0158618 | 0.0007059 |
| CRYL1     | 0.093009   | 0.0007078 |
| TFB2M     | 0.0582021  | 0.0007114 |
| SYAP1     | -0.036106  | 0.0007157 |
| HSPA4     | -0.021159  | 0.0007164 |
| TMEM167B  | -0.0197613 | 0.0007202 |
| SNRK      | -0.0300615 | 0.0007252 |
| DHPS      | -0.0148149 | 0.0007269 |
| CCDC90B   | 0.0210864  | 0.0007272 |
| SEC23IP   | -0.0277946 | 0.0007274 |
| MAP10     | 0.0039532  | 0.0007281 |
| RBBP6     | 0.1292945  | 0.0007281 |
| RPS6KA1   | -0.0638519 | 0.0007288 |
| CASP1     | 0.044061   | 0.0007296 |
| RAB7A     | -0.0250438 | 0.0007337 |
| PLA2G4A   | 0.0770993  | 0.0007337 |
| NTN1      | 0.0713905  | 0.0007378 |
| NEK9      | -0.0075552 | 0.0007392 |
| STARD7    | -0.0694393 | 0.0007414 |
| IFT27     | 0.0014554  | 0.0007458 |
| PCF11-AS1 | -0.0048894 | 0.0007468 |
| EBLN2     | -0.014444  | 0.0007483 |
| ERCC6     | -0.0427502 | 0.0007512 |
| DUSP22    | -0.0162018 | 0.0007534 |
| MRPL55    | 0.055482   | 0.0007556 |
| NUDT9     | 0.0206923  | 0.0007596 |
| PGM2L1    | -0.0070696 | 0.0007607 |
| LPGAT1    | -0.0525766 | 0.000762  |
| mars-02   | 0.0070155  | 0.0007677 |
| POR       | -0.037056  | 0.0007682 |
| LSM10     | 0.0350512  | 0.0007723 |
| AGPAT2    | 0.02562    | 0.0007733 |
| PRKAA1    | 0.0656262  | 0.000774  |
| ARMC7     | -0.0437956 | 0.0007773 |
| CAPNS1    | -0.033731  | 0.0007793 |
| AKAP11    | -0.0197876 | 0.0007802 |
| TPP2      | -0.0353142 | 0.000781  |
| KIFAP3    | 0.0242167  | 0.0007833 |
| GIT2      | -0.045857  | 0.0007836 |
| TADA2A    | 0.0106432  | 0.0007846 |
| BRD1      | -0.0379907 | 0.0007855 |
| DNAJC13   | -0.0285395 | 0.0007866 |
| GTF3C2    | -0.0139485 | 0.0007886 |
| SIGIRR    | 0.00508    | 0.000795  |
| PPP4R3A   | -0.0882435 | 0.0007966 |
| ZNF585B   | -0.0227211 | 0.0007981 |
| PHF10     | -0.0038079 | 0.0007981 |
| FUBP3     | -0.0609195 | 0.000801  |
| PPP1R8    | 0.0060013  | 0.0008011 |

|          |            |           |
|----------|------------|-----------|
| RAB40C   | -0.0547025 | 0.0008019 |
| CYB5A    | -0.0407705 | 0.0008019 |
| ZBTB11   | -0.0292792 | 0.0008026 |
| POP4     | -0.0187147 | 0.0008049 |
| SLF1     | 0.0421934  | 0.000805  |
| RPS15A   | -0.1225713 | 0.0008098 |
| BEND6    | -0.0702996 | 0.0008109 |
| GNB1     | -0.1435796 | 0.0008111 |
| COPA     | 0.0077476  | 0.0008124 |
| CBWD3    | -0.0721266 | 0.000817  |
| TIGD5    | 0.0084416  | 0.0008181 |
| ATP6V0D1 | -0.0508699 | 0.0008182 |
| ADRM1    | -0.0027728 | 0.0008207 |
| ING3     | -0.0636356 | 0.0008262 |
| MPRIP    | -0.0380085 | 0.0008267 |
| ARMC1    | -0.0132143 | 0.0008288 |
| ZNF154   | -0.0367267 | 0.0008291 |
| PEX13    | -0.0022472 | 0.0008302 |
| INTS7    | 0.0021612  | 0.0008319 |
| ZNF333   | -0.0447933 | 0.0008335 |
| ATG4B    | -0.026116  | 0.0008343 |
| MOB1A    | -0.1332139 | 0.0008346 |
| ATAD3A   | 0.0512937  | 0.0008356 |
| EMC9     | 0.0111753  | 0.0008358 |
| MORF4L2  | 0.0158823  | 0.0008359 |
| GNL1     | 0.0688729  | 0.0008461 |
| MRPS25   | 0.0456416  | 0.0008466 |
| F8A1     | -0.0323127 | 0.0008497 |
| LTB4R    | 0.0591314  | 0.0008512 |
| TMEM259  | -0.0308204 | 0.0008525 |
| MIF      | 0.2390371  | 0.000854  |
| ZNF675   | -0.032028  | 0.0008547 |
| TMEM217  | 0.0842114  | 0.0008594 |
| KCTD10   | -1.868E-05 | 0.0008618 |
| CRCP     | 0.0289169  | 0.0008619 |
| PACC1    | -0.0319051 | 0.0008621 |
| TRIP12   | -0.0851517 | 0.0008631 |
| BLOC1S6  | -0.113032  | 0.0008662 |
| NUDT16L1 | -0.0536383 | 0.0008699 |
| LMNB2    | 0.0179952  | 0.0008709 |
| SNX10    | -0.0970817 | 0.0008743 |
| SHQ1     | 0.0070017  | 0.0008757 |
| BAZ2A    | -0.0514072 | 0.0008762 |
| ELMSAN1  | -0.0967235 | 0.000877  |
| SLC38A9  | -0.0428123 | 0.0008784 |
| ZNF550   | -0.0031682 | 0.0008794 |
| FAM78A   | -0.0379464 | 0.0008837 |
| SDHAF2   | 0.0181668  | 0.0008846 |
| NTPCR    | -0.0306659 | 0.000886  |
| ZNF641   | -0.088874  | 0.0008871 |

|            |            |           |
|------------|------------|-----------|
| CCS        | 0.0542868  | 0.0008922 |
| DTX3L      | -0.0072503 | 0.000896  |
| C17orf67   | -0.0628038 | 0.0008964 |
| TRA2B      | 0.2005804  | 0.0008989 |
| SNHG9      | -0.0501185 | 0.0009036 |
| NSUN3      | -0.0448013 | 0.0009041 |
| NOP2       | 0.0069332  | 0.0009047 |
| PGAP2      | 0.015511   | 0.0009096 |
| SCO2       | 0.0535423  | 0.0009131 |
| DIAPH1     | 0.0558141  | 0.0009133 |
| ZNF667-AS1 | 0.039706   | 0.0009171 |
| NDUFAF5    | -0.0447784 | 0.0009178 |
| EPHB6      | -0.0196881 | 0.0009208 |
| DHX15      | -0.0437947 | 0.0009212 |
| RPS16      | 0.1273935  | 0.0009227 |
| AC139887.2 | -0.0269129 | 0.0009238 |
| ZNF576     | 0.0486612  | 0.0009301 |
| MDFI       | 0.1077555  | 0.0009302 |
| PRIMPOL    | -0.0071319 | 0.000931  |
| CXorf56    | -0.035103  | 0.0009349 |
| PRPF31     | 0.043526   | 0.0009359 |
| ATG3       | 0.0563964  | 0.000936  |
| SRBD1      | 0.0019567  | 0.0009367 |
| ZBTB40     | -0.0305537 | 0.0009395 |
| MR1        | -0.0125199 | 0.0009398 |
| THAP7      | 0.0609992  | 0.000941  |
| AXIN1      | -0.0416347 | 0.0009416 |
| TXK        | 0.0333524  | 0.0009455 |
| ARL16      | 0.0324768  | 0.0009475 |
| AL035071.1 | -0.0341056 | 0.0009502 |
| PTCD1      | -0.0239942 | 0.0009554 |
| ZNF852     | -0.0125203 | 0.0009564 |
| EAF1       | 0.0162481  | 0.0009598 |
| LARP1      | -0.1212355 | 0.000961  |
| FKBP11     | 0.1077807  | 0.0009666 |
| COQ8B      | 0.0094053  | 0.0009668 |
| NFU1       | -0.0537054 | 0.0009731 |
| CCDC144A   | -0.1303514 | 0.0009746 |
| ARID3B     | 0.0013043  | 0.0009766 |
| STAMBP     | -0.0365703 | 0.0009783 |
| TOR3A      | -0.0305194 | 0.0009802 |
| ATM        | -0.0738335 | 0.0009828 |
| FOXRED1    | -0.0089696 | 0.0009832 |
| DIMT1      | -0.0333905 | 0.0009866 |
| ALG10B     | -0.0588814 | 0.0009917 |
| FNBP1      | -0.1345115 | 0.0009929 |
| ZNF585A    | 0.0312737  | 0.001001  |
| PRKRA      | -0.0242413 | 0.001004  |
| NKX2-3     | 0.0224036  | 0.0010085 |
| PIGM       | -0.0870568 | 0.0010121 |

|            |            |           |
|------------|------------|-----------|
| WRNIP1     | -0.0593477 | 0.0010255 |
| LYRM2      | -0.0279622 | 0.0010299 |
| FAM3A      | 0.0095467  | 0.0010313 |
| CHPF2      | 0.0024472  | 0.0010313 |
| STRN3      | 0.0086248  | 0.0010396 |
| ZNF227     | -0.0065732 | 0.0010476 |
| DCTN3      | 0.0922852  | 0.0010487 |
| PEX2       | -0.0506822 | 0.0010495 |
| AC002558.3 | -0.0140968 | 0.0010574 |
| BOD1L1     | -0.0923824 | 0.0010579 |
| UTP6       | -0.0742686 | 0.00106   |
| YIF1B      | 0.0301257  | 0.0010622 |
| MTX1       | 0.0172322  | 0.0010772 |
| VPS11      | -0.0423248 | 0.0010773 |
| CD68       | 0.1270286  | 0.0010809 |
| ELOVL5     | -0.0618644 | 0.0010809 |
| MRPL50     | 0.0539738  | 0.0010822 |
| GPAT3      | 0.14891    | 0.0010836 |
| POLR2J3    | -0.1619148 | 0.0010838 |
| DUSP3      | 0.070147   | 0.0010859 |
| LONP2      | -0.0527722 | 0.0010868 |
| ANAPC10    | -0.0221332 | 0.0010918 |
| EIF2B5     | -0.0194532 | 0.0010932 |
| MRPS7      | 0.0951289  | 0.0010945 |
| ASNSD1     | -0.0249816 | 0.001097  |
| PARL       | -0.0360214 | 0.0010971 |
| ROCK2      | 0.0262794  | 0.0010995 |
| PITPNB     | 0.001681   | 0.0011002 |
| DERL1      | 0.0094012  | 0.0011006 |
| PNKP       | 0.0642427  | 0.001101  |
| AC009133.1 | -0.0273052 | 0.0011049 |
| NUP98      | -0.0482296 | 0.0011052 |
| SRRT       | 0.02466    | 0.0011057 |
| PDE6D      | -0.034875  | 0.0011067 |
| C15orf40   | -0.0361171 | 0.0011149 |
| FDX2       | 0.0680373  | 0.0011163 |
| ICE1       | -0.0395933 | 0.0011182 |
| C12orf76   | 0.0053123  | 0.0011195 |
| SS18L2     | 0.0264871  | 0.0011203 |
| AFTPH      | -0.0222288 | 0.0011218 |
| DGKA       | 0.1104215  | 0.0011228 |
| TENT2      | -0.0664394 | 0.0011233 |
| TPT1-AS1   | -0.0719112 | 0.0011287 |
| TM7SF2     | 0.0539557  | 0.0011292 |
| MGST3      | 0.2138905  | 0.0011321 |
| KLF10      | -0.0896048 | 0.0011376 |
| B3GNT2     | 0.0614377  | 0.0011394 |
| PHTF1      | -0.0593547 | 0.0011448 |
| KHDC4      | -0.085271  | 0.0011477 |
| POLR1B     | 0.0058706  | 0.0011486 |

|            |            |           |
|------------|------------|-----------|
| MED21      | -0.0788173 | 0.0011489 |
| WASHC2C    | -0.1153938 | 0.0011541 |
| DAPP1      | 0.0666939  | 0.0011575 |
| MLLT10     | -0.0457836 | 0.0011576 |
| AC097448.1 | -0.0353499 | 0.0011579 |
| SLC7A6     | 0.0439306  | 0.0011611 |
| WDR11      | -0.1265832 | 0.0011655 |
| STK10      | 0.0651945  | 0.001169  |
| NOL7       | 0.1497587  | 0.0011723 |
| ITPA       | 0.0496785  | 0.0011757 |
| SLC20A1    | -0.0042083 | 0.0011851 |
| DNAJB2     | -0.0259324 | 0.0011865 |
| SLU7       | -0.0206835 | 0.0011898 |
| DBNDD2     | 0.092423   | 0.0011904 |
| JMJD8      | 0.0216572  | 0.0011952 |
| EXOC3      | -0.127879  | 0.0011971 |
| TRAPPC6B   | -0.0853178 | 0.0011999 |
| IDI1       | 0.0240728  | 0.0012021 |
| YIPF5      | -0.0226401 | 0.0012022 |
| ACSL5      | 0.0058627  | 0.0012028 |
| IDUA       | -0.0403217 | 0.0012047 |
| UBN2       | -0.1033226 | 0.0012047 |
| KYAT3      | -0.0340168 | 0.0012065 |
| OSBPL5     | -0.0593842 | 0.0012127 |
| TRAP1      | 0.054556   | 0.0012165 |
| UPF2       | 0.0637642  | 0.0012205 |
| MED10      | 0.0644367  | 0.0012248 |
| MARK2      | -0.0498146 | 0.0012258 |
| TBC1D9B    | -0.0433801 | 0.0012278 |
| FKBP1A     | 0.0342581  | 0.0012297 |
| HMGB2      | 0.1218249  | 0.0012312 |
| CLSTN3     | -0.0174025 | 0.0012325 |
| NBN        | 0.0740268  | 0.0012325 |
| MCPH1      | -0.0491347 | 0.0012339 |
| LRP8       | 0.0708476  | 0.0012352 |
| PTRHD1     | -0.0041335 | 0.0012379 |
| PNKD       | 0.0471949  | 0.0012423 |
| ELAVL1     | 0.0019388  | 0.0012441 |
| DNAL1      | -0.0332555 | 0.0012461 |
| SUPV3L1    | 0.0075666  | 0.0012468 |
| DOK1       | 0.0234706  | 0.0012501 |
| ZNF414     | 0.0048787  | 0.0012532 |
| CBFA2T3    | 0.0810169  | 0.0012592 |
| FANCM      | -0.0166685 | 0.0012598 |
| TRAPPC12   | -0.017586  | 0.0012644 |
| GPBP1L1    | -0.100432  | 0.0012652 |
| MRPL52     | -0.0341667 | 0.0012674 |
| SIL1       | 0.0696156  | 0.0012684 |
| RFNG       | 0.0145233  | 0.0012715 |
| CHTOP      | -0.0001125 | 0.0012792 |

|            |            |           |
|------------|------------|-----------|
| SRPRB      | -0.0175848 | 0.0012795 |
| BNIP2      | 0.0952845  | 0.0012806 |
| DDX54      | -0.0003072 | 0.0012828 |
| GZF1       | -0.0046988 | 0.0012866 |
| SEPTIN1    | 0.033252   | 0.0012879 |
| DHRX       | -0.0466378 | 0.0012879 |
| TP53I13    | 0.0578954  | 0.0012883 |
| NF2        | -0.000449  | 0.0012904 |
| ZBTB43     | -0.0136863 | 0.0012906 |
| PFKP       | 0.1097981  | 0.0012912 |
| AKR1B1     | 0.1089402  | 0.0012939 |
| PDPK1      | -0.0200651 | 0.0012946 |
| THOC6      | 0.0090687  | 0.0012974 |
| KRT17      | -0.0922459 | 0.0012975 |
| CARF       | -0.0754565 | 0.0013014 |
| TMEM115    | 0.0204736  | 0.0013048 |
| FAM177A1   | -9.37E-05  | 0.0013066 |
| PCYOX1L    | 0.0134832  | 0.0013076 |
| MRPL13     | 0.0930401  | 0.0013083 |
| SMIM19     | -0.0340557 | 0.0013096 |
| PRORP      | 0.032229   | 0.0013101 |
| CNP        | -0.0166237 | 0.0013109 |
| PM20D2     | 0.1347124  | 0.0013114 |
| PATZ1      | -0.0073759 | 0.001319  |
| WEE1       | -0.0158377 | 0.0013191 |
| SHKBP1     | -0.0151965 | 0.0013203 |
| TSPYL1     | -0.0946119 | 0.0013229 |
| VAR5       | 0.025909   | 0.0013237 |
| EID3       | -0.0237415 | 0.0013244 |
| MRPL18     | 0.1044693  | 0.0013254 |
| DTD2       | -0.0052945 | 0.0013264 |
| EDEM2      | -0.0080202 | 0.0013287 |
| TRMO       | 0.0099711  | 0.0013291 |
| MYBBP1A    | 0.0048341  | 0.0013292 |
| CLK2       | 0.0243717  | 0.0013292 |
| SHFL       | -0.0351339 | 0.0013302 |
| ZCCHC9     | -0.0114079 | 0.0013334 |
| STX4       | 0.0672953  | 0.0013359 |
| ORC6       | 0.0531671  | 0.0013367 |
| AC245014.3 | 0.1041864  | 0.0013376 |
| ELMO1      | -0.0537758 | 0.0013422 |
| PITPNM1    | -0.0296155 | 0.0013462 |
| TLE5       | 0.1128793  | 0.0013514 |
| ANGPTL6    | -0.0048886 | 0.0013541 |
| MARCH1     | 0.1180199  | 0.0013555 |
| NEK7       | -0.0385263 | 0.0013585 |
| PRXL2C     | 0.0038351  | 0.0013595 |
| UTP15      | 0.0054889  | 0.0013628 |
| YPEL5      | 0.0736194  | 0.001367  |
| GMFB       | -0.0379691 | 0.0013685 |

|            |            |           |
|------------|------------|-----------|
| SUGP1      | -0.0001146 | 0.0013702 |
| CNOT10     | 0.0145872  | 0.0013702 |
| BCOR       | -0.0966225 | 0.0013771 |
| TAF15      | 0.0013863  | 0.0013827 |
| MTREX      | -0.0303776 | 0.0013839 |
| PHC3       | -0.0310571 | 0.0013856 |
| PHC1       | 0.0171101  | 0.0013898 |
| TOM1L2     | 0.00495    | 0.0013915 |
| TMEM260    | -0.039084  | 0.0013987 |
| GFM1       | -0.0449798 | 0.0013991 |
| SETDB1     | -0.0233898 | 0.0014011 |
| TRIQK      | 0.0217635  | 0.00141   |
| ALDH3B1    | -0.0077438 | 0.0014126 |
| TGS1       | 0.0228999  | 0.0014145 |
| ACBD5      | -0.0753602 | 0.0014169 |
| SMYD4      | -0.0150676 | 0.0014186 |
| NOSIP      | 0.0170431  | 0.0014196 |
| SELENOW    | 0.1703888  | 0.0014198 |
| DCAF12     | 0.0416799  | 0.0014199 |
| TMEM70     | 0.05363    | 0.0014241 |
| ITGB2      | 0.1274562  | 0.0014297 |
| KRI1       | 0.0319222  | 0.0014312 |
| ATG13      | -0.0558099 | 0.0014324 |
| AC016735.1 | -0.014036  | 0.0014352 |
| KDM2A      | -0.0447575 | 0.0014458 |
| RPA2       | -0.0800263 | 0.0014458 |
| KXD1       | -0.0385183 | 0.0014461 |
| GNAI1      | 0.1890388  | 0.0014526 |
| PPA2       | -0.0175386 | 0.0014526 |
| ARMC10     | -0.1027972 | 0.001454  |
| COPG2      | -0.0418595 | 0.0014551 |
| VPS13B     | -0.0113541 | 0.001458  |
| AL157392.3 | -0.0657948 | 0.0014586 |
| COMMD5     | -0.0333311 | 0.0014591 |
| ABHD8      | -0.0401031 | 0.0014765 |
| TSTA3      | 0.1161134  | 0.001484  |
| ACOT2      | -0.0215254 | 0.0014895 |
| TOR4A      | -0.0367294 | 0.0014906 |
| AL513550.1 | 0.0077728  | 0.001491  |
| C1QTNF4    | 0.1643549  | 0.0014918 |
| ZKSCAN2-D  | -0.0604207 | 0.0015017 |
| AC104083.1 | -0.0037567 | 0.0015066 |
| CALHM6     | 0.1602097  | 0.001509  |
| TRIO       | 0.0163006  | 0.0015155 |
| AL035587.1 | -0.0246528 | 0.0015223 |
| RSU1       | -0.0724356 | 0.0015286 |
| RRS1       | 0.0482769  | 0.0015309 |
| LDB1       | -0.0113538 | 0.0015347 |
| CYB5B      | -0.0397981 | 0.0015364 |
| RER1       | 0.0422051  | 0.0015375 |



|            |            |           |
|------------|------------|-----------|
| SLC25A32   | -0.0114111 | 0.0015383 |
| ZSCAN16-A  | -0.1094216 | 0.0015394 |
| TTC5       | 0.0023926  | 0.0015418 |
| BRAT1      | 0.0128489  | 0.0015459 |
| EPS15L1    | -0.0777387 | 0.001552  |
| DDX28      | 0.0216417  | 0.0015586 |
| MADD       | -0.0728103 | 0.0015597 |
| IKBKB      | -0.038438  | 0.0015605 |
| NT5C2      | 0.001078   | 0.0015663 |
| ZNF451     | -0.0642129 | 0.0015705 |
| COQ9       | 0.0302687  | 0.0015756 |
| LINC00996  | -0.1199154 | 0.0015757 |
| RBM48      | 0.0078869  | 0.0015772 |
| MRPL3      | 0.0494791  | 0.001578  |
| AC211476.6 | -0.0422128 | 0.0015833 |
| CERT1      | -0.010302  | 0.0015858 |
| CEP104     | -0.0368397 | 0.0015888 |
| UBA7       | 0.009493   | 0.0015891 |
| KBTBD7     | -0.0194462 | 0.0015906 |
| HOXB3      | -0.1481684 | 0.0015927 |
| CHD6       | -0.0316147 | 0.0015931 |
| C16orf70   | -0.016916  | 0.0015941 |
| ZNF619     | -0.0036304 | 0.0015961 |
| METTL4     | 9.226E-05  | 0.0015997 |
| DRG2       | 0.0200255  | 0.0016025 |
| PIGT       | 0.0378829  | 0.0016043 |
| TBC1D22A   | -0.0274586 | 0.0016079 |
| SLC7A6OS   | 0.0210038  | 0.0016087 |
| PSMG2      | -0.0418451 | 0.0016095 |
| ARF6       | -0.031679  | 0.0016175 |
| BTK        | -0.0247256 | 0.0016225 |
| PLCB2      | 0.0005053  | 0.0016228 |
| DYNC1LI1   | 0.0293407  | 0.0016353 |
| GSTM4      | 0.0507156  | 0.0016443 |
| TIGAR      | -0.0283192 | 0.0016485 |
| ZSWIM1     | -0.0490374 | 0.0016529 |
| PACRGL     | -0.02685   | 0.0016584 |
| PICALM     | -0.1082555 | 0.0016626 |
| TTC17      | -0.0490408 | 0.0016757 |
| SEC23A     | -0.0526516 | 0.0016793 |
| HIRA       | -0.0036742 | 0.0016808 |
| HCCS       | 0.009741   | 0.0016865 |
| TIMM10     | 0.0354013  | 0.0016879 |
| UBR3       | -0.0412364 | 0.0016892 |
| VCP        | 0.0128034  | 0.0016944 |
| ZNF621     | -0.0240165 | 0.0016952 |
| PHB2       | 0.1092414  | 0.0016987 |
| SMAP1      | -0.0609455 | 0.0017003 |
| TMEM94     | 0.0377413  | 0.001704  |
| RAB11FIP4  | -0.0352327 | 0.0017049 |

|            |            |           |
|------------|------------|-----------|
| CNN2       | -0.0563283 | 0.0017111 |
| PORCN      | -0.0184109 | 0.0017152 |
| MANBAL     | 0.0176084  | 0.0017159 |
| SRPK1      | 0.0289212  | 0.0017214 |
| POLR2J2    | -0.005379  | 0.0017219 |
| ZNF736     | -0.0562726 | 0.0017235 |
| APOL1      | -0.0325592 | 0.0017278 |
| CCDC28B    | 0.0841188  | 0.00173   |
| USPL1      | -0.0207886 | 0.001731  |
| ACOT8      | -0.0073197 | 0.0017323 |
| CEP128     | -0.0715846 | 0.0017324 |
| RAB1B      | -0.0003582 | 0.0017344 |
| MTX2       | -0.0205475 | 0.0017355 |
| NCOA6      | -0.0441519 | 0.0017366 |
| DERL2      | 0.0003515  | 0.0017371 |
| A1BG       | 0.1162979  | 0.0017394 |
| SRFBP1     | 0.0108135  | 0.0017499 |
| ABHD14B    | 0.0944091  | 0.0017637 |
| COA7       | 0.0337931  | 0.0017735 |
| TUBB6      | 0.1084251  | 0.0017773 |
| EIF2B1     | -0.0223946 | 0.0017798 |
| THUMPD1    | -0.1824269 | 0.0017808 |
| ZBTB1      | -0.058671  | 0.0017822 |
| GOLGA7     | -0.0064349 | 0.0017892 |
| KLHL20     | 0.0117229  | 0.00179   |
| MTMR6      | -0.0220675 | 0.0018041 |
| VAPA       | -0.1991218 | 0.0018096 |
| ERGIC3     | -0.0516223 | 0.001816  |
| UBFD1      | 0.0161193  | 0.0018203 |
| ZNF407     | 0.0159871  | 0.0018228 |
| CCAR2      | -0.0206122 | 0.001824  |
| DYRK4      | 0.0129851  | 0.001826  |
| PUSL1      | 0.0041835  | 0.001829  |
| ODF2       | -0.058745  | 0.0018302 |
| GUF1       | -0.0247556 | 0.0018352 |
| AGPAT5     | 0.0483176  | 0.0018502 |
| DVL3       | -0.0737185 | 0.0018519 |
| AC090630.1 | -0.0360203 | 0.0018532 |
| TRAF3      | -0.069333  | 0.0018576 |
| TMEM205    | 0.1186025  | 0.0018634 |
| MTF2       | 0.0833228  | 0.0018669 |
| TP53RK     | -0.0245602 | 0.0018748 |
| SATB1-AS1  | 0.0175965  | 0.001876  |
| ZNF510     | 0.0018733  | 0.0018811 |
| TMEM18     | -0.0399241 | 0.0018814 |
| JPT2       | 0.0166255  | 0.0018829 |
| ZNF649     | -0.0034289 | 0.0018903 |
| AVL9       | -0.0678004 | 0.0019034 |
| OSCAR      | 0.0135495  | 0.001905  |
| DRAP1      | -0.2009239 | 0.001905  |

|            |            |           |
|------------|------------|-----------|
| STAT5B     | -0.0305908 | 0.0019105 |
| BROX       | -0.1078319 | 0.001915  |
| MSRB2      | 0.1371709  | 0.0019152 |
| GNA13      | -0.0287438 | 0.0019162 |
| PREP       | -0.0423039 | 0.001921  |
| HADHB      | 0.0078838  | 0.0019222 |
| CIAPIN1    | -0.0072775 | 0.0019236 |
| EMC3       | -0.0158513 | 0.0019424 |
| VPS4A      | 0.0394806  | 0.001957  |
| ZFPL1      | -0.0117182 | 0.0019612 |
| PRIM1      | 0.0904667  | 0.0019662 |
| RPS4X      | 0.1241826  | 0.0019789 |
| NBR2       | -0.0387595 | 0.0019809 |
| WFDC1      | 0.065972   | 0.0019837 |
| CFAP410    | -0.0078467 | 0.0020024 |
| DDB1       | 0.0284985  | 0.002013  |
| NUP93      | -0.0330565 | 0.0020163 |
| AC019205.1 | -0.0734705 | 0.0020165 |
| IDH2       | 0.0127527  | 0.002027  |
| LRRC57     | -0.0594773 | 0.0020315 |
| SMIM3      | 0.1417695  | 0.0020326 |
| NNT        | -0.0629403 | 0.0020359 |
| C11orf21   | 0.0972217  | 0.0020373 |
| TAF9       | 0.0625849  | 0.0020387 |
| AGO3       | -0.1751651 | 0.0020413 |
| TET2       | -0.1270399 | 0.002047  |
| JAG1       | 0.102087   | 0.0020478 |
| AC127502.2 | -0.0391731 | 0.0020543 |
| SLC35B1    | -0.042965  | 0.0020573 |
| PIGH       | -0.0295846 | 0.0020609 |
| IBTK       | -0.0524194 | 0.0020644 |
| ZNF469     | -0.0352463 | 0.0020659 |
| TMED10     | 0.0171741  | 0.0020788 |
| NGRN       | -0.0200267 | 0.0020791 |
| USP36      | 0.033091   | 0.0020799 |
| PSMB6      | 0.0778247  | 0.002085  |
| TMEM126A   | 0.0670112  | 0.0020852 |
| WDR1       | 0.0691938  | 0.0020878 |
| NDUFB7     | 0.1365146  | 0.0020918 |
| PRKCSH     | -0.056918  | 0.0020939 |
| DYM        | -0.0308583 | 0.0021066 |
| ABITRAM    | -0.0324905 | 0.0021102 |
| SULT1A1    | -0.0246413 | 0.0021152 |
| CLK1       | -0.0798611 | 0.0021152 |
| GNL2       | -0.0349836 | 0.0021155 |
| LANCL1     | -0.0111678 | 0.0021231 |
| IDNK       | -0.0647665 | 0.0021254 |
| BRCA1      | 0.1017173  | 0.0021269 |
| ATAT1      | -0.0148169 | 0.0021276 |
| TRPT1      | -0.05803   | 0.0021289 |

|            |            |           |
|------------|------------|-----------|
| ZNF44      | -0.0756797 | 0.0021312 |
| PDLIM5     | -0.0635187 | 0.0021323 |
| CINP       | 0.0475647  | 0.0021332 |
| ANKRD10    | -0.0331043 | 0.0021343 |
| AC087190.1 | -0.0080848 | 0.002138  |
| PNPLA2     | -0.0284007 | 0.002142  |
| NXT1       | 0.0120309  | 0.0021498 |
| CFAP20     | 0.0326865  | 0.0021567 |
| NUBP1      | 0.0049687  | 0.0021627 |
| METTL25    | -0.0263417 | 0.0021721 |
| TJAP1      | -0.0296165 | 0.002173  |
| TAZ        | 0.0488566  | 0.0021732 |
| ECPAS      | -0.0704384 | 0.0021889 |
| FBXL5      | -0.0297579 | 0.0021956 |
| MAP2K4     | -0.0022109 | 0.0021986 |
| YWHAH      | -0.0081552 | 0.0022048 |
| IDH3B      | 0.0229577  | 0.0022064 |
| CKS2       | -0.0794991 | 0.0022192 |
| SLC39A10   | -0.1013363 | 0.0022195 |
| ZNF623     | -0.0286017 | 0.0022198 |
| UCHL5      | 0.0295057  | 0.0022273 |
| GOLGA8A    | -0.0406025 | 0.0022281 |
| RASAL2     | -0.0598535 | 0.0022331 |
| MAN1A2     | -0.0765652 | 0.0022368 |
| MYL5       | 0.0570388  | 0.0022375 |
| CAMK2G     | 0.0529345  | 0.0022441 |
| TIMM21     | -0.0237807 | 0.0022464 |
| TMEM256    | 0.0022544  | 0.0022483 |
| NIPSNAP3B  | -0.0295706 | 0.0022559 |
| TMEM184B   | -0.0067036 | 0.0022572 |
| CMBL       | 0.0881542  | 0.0022596 |
| FOXN3      | -0.1163664 | 0.0022605 |
| CNTLN      | 0.105965   | 0.0022626 |
| KBTBD2     | -0.0527591 | 0.0022634 |
| SPIN1      | -0.0659095 | 0.002264  |
| AC079781.5 | -0.0284159 | 0.0022652 |
| SYTL1      | 0.0125121  | 0.00227   |
| NECAP1     | -0.0257467 | 0.0022715 |
| ACAT2      | -0.0276358 | 0.0022742 |
| RNF19B     | -0.0448472 | 0.0022759 |
| ABL1       | 0.0051827  | 0.0022779 |
| B3GALNT1   | 0.0011722  | 0.0022798 |
| UBE2F      | -0.1454347 | 0.0022841 |
| PLAGL2     | 0.0088168  | 0.0022878 |
| CARD8-AS1  | -0.0125543 | 0.0022962 |
| AC007566.1 | -0.0707319 | 0.0023058 |
| AC004148.1 | -0.0244623 | 0.0023162 |
| LRMDA      | -0.0947401 | 0.002321  |
| H2AFY2     | -0.0023504 | 0.0023322 |
| SLC25A25-A | -0.0314609 | 0.0023438 |

|            |            |           |
|------------|------------|-----------|
| CHERP      | 0.0331297  | 0.0023566 |
| SNHG12     | -0.1980182 | 0.002362  |
| PCYT2      | -0.0263424 | 0.0023624 |
| TEX261     | -0.0144462 | 0.0023678 |
| CCNT2      | -0.0453896 | 0.0023814 |
| CAHM       | 0.0086329  | 0.002394  |
| ISOC1      | -0.0200346 | 0.0024039 |
| RNF125     | 0.1146294  | 0.0024082 |
| BCKDHB     | -0.040403  | 0.0024099 |
| KMT5B      | -0.0244846 | 0.002413  |
| ALKBH4     | -0.0182636 | 0.0024185 |
| TAPBPL     | 0.0243121  | 0.0024224 |
| C1orf131   | 0.0444069  | 0.0024302 |
| FOXN2      | -0.0380834 | 0.002437  |
| LIPE-AS1   | -0.0438274 | 0.0024534 |
| LY6G5B     | -0.0302183 | 0.0024553 |
| BIK        | -0.0630931 | 0.0024584 |
| NARS2      | 0.0132785  | 0.0024598 |
| TSHZ1      | -0.0249687 | 0.0024626 |
| LIN54      | -0.0277881 | 0.0024703 |
| GIN52      | 0.0899081  | 0.0024745 |
| HIRIP3     | 0.0678946  | 0.0024786 |
| YTHDF3     | -0.0576155 | 0.0024866 |
| MYO1G      | -0.1228169 | 0.002489  |
| GON4L      | 0.0221461  | 0.0025083 |
| AL035530.2 | -0.022486  | 0.0025196 |
| EIF4ENIF1  | -0.0187818 | 0.0025214 |
| RHOF       | -0.0272008 | 0.0025252 |
| TARS       | -0.0174512 | 0.0025262 |
| CUX1       | -0.1445427 | 0.0025354 |
| EIF4A3     | -0.0268729 | 0.0025354 |
| SDR39U1    | 0.0605369  | 0.0025458 |
| HIF1A-AS3  | -0.0407326 | 0.0025528 |
| NRXN2      | 0.0629878  | 0.0025596 |
| KDM5C      | -0.046986  | 0.0025609 |
| RELA       | -0.0575061 | 0.0025626 |
| EXOC3-AS1  | -0.0406252 | 0.0025748 |
| CLN5       | -0.0772708 | 0.0025785 |
| ATP6V0C    | -0.1669598 | 0.0025818 |
| ESRRA      | -0.0046811 | 0.0025831 |
| EXOC5      | -0.0359423 | 0.002616  |
| SECISBP2L  | -0.0536276 | 0.0026203 |
| DCAF11     | -0.06367   | 0.0026211 |
| DTX2       | 0.0089613  | 0.0026272 |
| OSTM1      | -0.0494027 | 0.0026367 |
| LPAR2      | -0.0293938 | 0.0026424 |
| SEPHS2     | -0.0928742 | 0.0026479 |
| DAP        | -0.0268957 | 0.0026518 |
| FAM234A    | -0.0120566 | 0.0026539 |
| LIMK1      | -0.0560426 | 0.0026549 |

|           |            |           |
|-----------|------------|-----------|
| RXFP1     | 0.0986179  | 0.0026553 |
| ZNF793    | -0.0643787 | 0.0026555 |
| RBM15     | 0.0152012  | 0.0026589 |
| DAP3      | -0.0066407 | 0.0026602 |
| MSMO1     | -0.1036794 | 0.0026618 |
| Z83843.1  | -0.1289537 | 0.0026661 |
| ACAA1     | 0.0490942  | 0.0026671 |
| OTUD4     | -0.0490559 | 0.0026713 |
| BTAF1     | -0.034209  | 0.0026737 |
| TNFRSF18  | 0.121665   | 0.0026837 |
| RABGGTA   | -0.0247733 | 0.0026868 |
| CCDC88C   | -0.0565137 | 0.0026915 |
| PDE1B     | -0.0146293 | 0.0027082 |
| SNX1      | -0.0319568 | 0.0027143 |
| ELP6      | 0.0404459  | 0.0027144 |
| CIAO1     | 0.0437488  | 0.0027175 |
| MAP2K3    | 0.0499723  | 0.0027192 |
| ATG16L2   | -0.0547466 | 0.0027207 |
| MLF2      | 0.0193809  | 0.0027267 |
| KDM6A     | -0.0439903 | 0.0027296 |
| RAB33B    | -0.002856  | 0.0027306 |
| STAT2     | -0.0891147 | 0.0027309 |
| CSNK1E    | 0.0333674  | 0.0027312 |
| ABCA2     | -0.0262589 | 0.0027501 |
| TP53I3    | 0.0155795  | 0.0027867 |
| EVL       | -0.0203177 | 0.0027868 |
| PICK1     | 0.0186331  | 0.0027911 |
| TIMM8B    | 0.0526702  | 0.0027926 |
| ELP4      | -0.0165767 | 0.0028124 |
| SGMS1-AS1 | -0.0300291 | 0.0028291 |
| TRIOBP    | -0.0098741 | 0.0028291 |
| RP9       | 0.0344396  | 0.0028325 |
| EIF2B2    | -0.0034737 | 0.0028373 |
| HDAC2     | -0.0895178 | 0.0028423 |
| STAU1     | -0.0205008 | 0.0028498 |
| NAGLU     | -0.0112086 | 0.0028543 |
| RDH14     | 0.0170208  | 0.0028603 |
| APOLD1    | -0.1077733 | 0.0028646 |
| TUFM      | 0.1355482  | 0.0028706 |
| SAR1B     | -0.0098688 | 0.0028774 |
| TLE4      | -0.0015515 | 0.0028903 |
| RIOK2     | -0.0017085 | 0.0028939 |
| NEK4      | -0.0229834 | 0.0028977 |
| BRD7      | -0.10564   | 0.0029029 |
| TBC1D10B  | -0.0108303 | 0.0029126 |
| USP20     | -0.0560717 | 0.0029175 |
| SAFB2     | -0.0604072 | 0.0029265 |
| ZNF217    | 0.0448895  | 0.002937  |
| TRMT13    | 0.0002201  | 0.0029385 |
| NFATC1    | -0.0313951 | 0.0029404 |

|           |            |           |
|-----------|------------|-----------|
| DGCR2     | -0.0315476 | 0.0029421 |
| PARP6     | -0.0078991 | 0.0029525 |
| TMEM179B  | 0.0421103  | 0.0029547 |
| DOCK7     | 0.034847   | 0.0029815 |
| BAG6      | 0.0052521  | 0.0029837 |
| NFE2L1    | -0.0907792 | 0.0029841 |
| RCC1L     | 0.0169805  | 0.0029898 |
| RAD23A    | -0.0135818 | 0.0029918 |
| PTBP2     | -0.0642191 | 0.0030108 |
| NME3      | 0.1156581  | 0.0030182 |
| TMEM250   | -0.0292799 | 0.0030191 |
| UBE3C     | -0.0130148 | 0.0030289 |
| RAB5C     | -0.0352486 | 0.0030308 |
| RCBTB2    | -0.0108816 | 0.0030427 |
| C2CD3     | 0.0038392  | 0.0030466 |
| SRP14-AS1 | 0.0459112  | 0.0030483 |
| CNIH4     | -0.049571  | 0.0030536 |
| FMR1-IT1  | -0.0426827 | 0.0030608 |
| USP1      | 0.0761479  | 0.0030663 |
| AEBP2     | -0.0362492 | 0.003074  |
| BABAM1    | -0.0056637 | 0.0030979 |
| ABHD12    | -0.0142695 | 0.003106  |
| ZCCHC10   | -0.0896057 | 0.0031142 |
| MDM1      | -0.021249  | 0.0031172 |
| EIF3G     | 0.1497953  | 0.0031331 |
| SRM       | 0.117033   | 0.0031386 |
| CBX6      | 0.0863185  | 0.0031437 |
| C18orf25  | -0.026245  | 0.003162  |
| GDI1      | 0.0076768  | 0.0031675 |
| PTPN22    | -0.018893  | 0.0031681 |
| ZRSR2     | -0.0611594 | 0.0031753 |
| DIRAS3    | 0.066107   | 0.0031773 |
| MFSD5     | -0.025965  | 0.0031782 |
| PSMB2     | 0.0652448  | 0.0031878 |
| MRPS5     | -0.0632491 | 0.0031885 |
| AGGF1     | -0.0381303 | 0.0031903 |
| PML       | 0.0242184  | 0.0031939 |
| ZMYM2     | -0.1281474 | 0.0031958 |
| DPF2      | -0.0217679 | 0.0032068 |
| HOXB6     | -0.0853519 | 0.0032101 |
| EIF4G1    | 0.0030013  | 0.003211  |
| ENTR1     | -0.0049365 | 0.0032116 |
| AFG3L2    | -0.0287667 | 0.0032144 |
| RRM1      | 0.0750298  | 0.0032281 |
| MAGOHB    | 0.0145369  | 0.003254  |
| MRS2      | -0.0499255 | 0.0032631 |
| CD151     | 0.0424863  | 0.0032677 |
| SYTL4     | 0.0985707  | 0.0032722 |
| ZFP82     | -0.000187  | 0.0032891 |
| MPHOSPH1  | -0.0266312 | 0.0033131 |

|           |            |           |
|-----------|------------|-----------|
| PDCD10    | -0.0111532 | 0.0033254 |
| HINT2     | 0.054437   | 0.0033278 |
| LINC01150 | 0.0189562  | 0.0033282 |
| MRPL20    | 0.0476806  | 0.0033332 |
| L3MBTL2   | -0.011184  | 0.0033488 |
| CARMIL2   | 0.0172281  | 0.0033492 |
| C16orf58  | -0.010339  | 0.0033506 |
| CPPED1    | 0.0384913  | 0.0033939 |
| PCBP1-AS1 | -0.0738787 | 0.0034004 |
| SLC7A1    | -0.0136703 | 0.0034031 |
| PROSER1   | -0.0305136 | 0.0034126 |
| NIPAL2    | -0.0300962 | 0.0034303 |
| PPP3CB-AS | -0.001836  | 0.0034372 |
| C2orf69   | -0.0289722 | 0.0034415 |
| STK32C    | -0.0967571 | 0.0034477 |
| ACAP3     | 0.0185614  | 0.0034506 |
| PCED1A    | -0.0325369 | 0.0034688 |
| PRKDC     | 0.0876013  | 0.0034729 |
| IGSF10    | -0.0020106 | 0.0034748 |
| MFSD11    | -0.0178732 | 0.003476  |
| OTUD6B-AS | 0.0428714  | 0.0034835 |
| TCAF1     | 0.0037379  | 0.0034888 |
| FER       | -0.0564419 | 0.0034983 |
| BYSL      | 0.0353338  | 0.0035161 |
| RNGTT     | 0.0147744  | 0.0035165 |
| CORO1C    | 0.0860954  | 0.0035248 |
| SDHAF3    | -0.0044292 | 0.0035249 |
| TRAF3IP3  | 0.0500862  | 0.0035362 |
| CCDC97    | -0.0205766 | 0.0035411 |
| BLZF1     | 0.021039   | 0.003549  |
| EIF1AD    | -0.0230597 | 0.0035547 |
| ZSCAN25   | -0.0153525 | 0.0035556 |
| PRMT3     | -0.0350456 | 0.0035615 |
| PFDN2     | 0.0911444  | 0.0035628 |
| WDR60     | -0.0120879 | 0.0035633 |
| PIK3CD    | -0.0263299 | 0.0035638 |
| ZNF91     | -0.0824884 | 0.0035678 |
| DHODH     | 0.007344   | 0.0035907 |
| KMT2B     | 0.0385843  | 0.0036015 |
| ZNF140    | -0.0235935 | 0.0036075 |
| JRKL      | -0.016098  | 0.0036089 |
| LZIC      | 0.019761   | 0.0036096 |
| ZNF737    | -0.1128802 | 0.0036277 |
| CHUK      | -0.0206172 | 0.003634  |
| PHF8      | -0.0299511 | 0.003634  |
| HMGXB4    | 0.0639294  | 0.0036347 |
| HAUS1     | -0.019449  | 0.0036422 |
| RNF34     | -0.0057928 | 0.0036455 |
| SPATC1L   | 0.0400247  | 0.0036541 |
| SERPINB6  | 0.1236842  | 0.0036583 |



|            |            |           |
|------------|------------|-----------|
| IDH3A      | 0.0185656  | 0.0036755 |
| PSTPIP1    | 0.068796   | 0.0036766 |
| SCRN2      | 0.0673604  | 0.0036907 |
| ZNF408     | -0.0042102 | 0.0036937 |
| ZBTB24     | 0.0160416  | 0.0036941 |
| SETDB2     | -0.1089228 | 0.003698  |
| RIT1       | -0.0602114 | 0.0037029 |
| ITFG2-AS1  | -0.0411303 | 0.0037068 |
| DCTN4      | -0.0504731 | 0.0037152 |
| GNB5       | -0.0447916 | 0.0037503 |
| ELOVL1     | 0.0009783  | 0.0037506 |
| CORO1A     | 0.1417466  | 0.0037542 |
| TMED3      | 0.0486797  | 0.0037962 |
| SMG8       | -0.0561904 | 0.0037969 |
| PPP6R3     | -0.0521508 | 0.0037981 |
| EXT2       | 0.0063405  | 0.0038042 |
| GIMAP1     | 0.0091647  | 0.0038085 |
| DPP9       | -0.00108   | 0.0038091 |
| PPP4R3B    | -0.0302269 | 0.0038329 |
| AC024075.1 | -0.0327531 | 0.0038491 |
| RPL9       | -0.106395  | 0.0038503 |
| BCL2L2     | -0.027314  | 0.0038505 |
| IRF7       | -0.0039417 | 0.0038529 |
| MBTPS1     | 0.0149981  | 0.0038571 |
| ATXN7L1    | -0.0234306 | 0.0038656 |
| HMGN4      | 0.030926   | 0.0038811 |
| WDR61      | -0.0718529 | 0.0038892 |
| SCO1       | -0.0386605 | 0.0038954 |
| TASOR      | -0.022943  | 0.0039025 |
| AL589863.1 | -0.031474  | 0.0039106 |
| SNX2       | 0.0623852  | 0.0039106 |
| LINC00963  | -0.0223797 | 0.0039129 |
| RAB13      | 0.2074413  | 0.0039434 |
| CCNB1      | 0.0279634  | 0.0039442 |
| ACSL1      | 0.0168954  | 0.0039557 |
| CLTC       | -0.0407563 | 0.0039568 |
| HIKESHI    | 0.0077462  | 0.0039755 |
| DOK3       | 0.0179247  | 0.0039814 |
| TNFSF4     | 0.1148127  | 0.0039953 |
| PSMC4      | -0.0042549 | 0.0039965 |
| UBAP1      | 0.0102697  | 0.0040186 |
| PPWD1      | -0.0786485 | 0.0040269 |
| CATSPERG   | -0.0603312 | 0.0040298 |
| SELENOF    | -0.0847316 | 0.0040359 |
| NEMP1      | -0.0366723 | 0.0040378 |
| USP34      | -0.1037127 | 0.0040409 |
| ZNF331     | 0.033514   | 0.004043  |
| HIST1H1B   | 0.186698   | 0.0040489 |
| PANK2      | -0.0191439 | 0.0040514 |
| ANKLE2     | -0.0362117 | 0.0040592 |

|            |            |           |
|------------|------------|-----------|
| CES2       | 0.0088581  | 0.0040624 |
| AL133453.1 | -0.0088113 | 0.0040898 |
| AL138963.4 | -0.0420788 | 0.0040946 |
| AC015802.6 | -0.0552768 | 0.0040988 |
| SERPINF2   | -0.0330621 | 0.0041083 |
| NT5DC1     | -0.0505233 | 0.0041435 |
| CASC3      | -0.0191234 | 0.0041442 |
| TNPO3      | -0.0054329 | 0.0041634 |
| POC1B      | 0.0532332  | 0.0041654 |
| FUCA2      | 0.0457822  | 0.0041664 |
| NOL9       | -0.0229339 | 0.0041704 |
| TBC1D7     | -0.0126482 | 0.004172  |
| DACH1      | -0.0364983 | 0.0041736 |
| PRDX1      | 0.236709   | 0.0041742 |
| ZNF337     | 0.0021237  | 0.0041747 |
| SCMH1      | -0.0089485 | 0.0041762 |
| ARSA       | 0.0044024  | 0.004177  |
| TNKS       | -0.0113538 | 0.0041783 |
| INTS12     | -0.0364181 | 0.0041786 |
| MYO19      | 0.0012683  | 0.0041819 |
| USE1       | 0.030174   | 0.0041819 |
| NCBP2      | -0.1001079 | 0.0041864 |
| CSRP1      | -0.0718829 | 0.0041917 |
| TTC14      | -0.1376569 | 0.0042108 |
| LEMD2      | -0.0040163 | 0.0042119 |
| TPGS1      | 0.1051375  | 0.0042213 |
| PTPN4      | 0.0079141  | 0.0042532 |
| TLL12      | 0.002899   | 0.0042635 |
| MALAT1     | -0.1697526 | 0.0042662 |
| INPP5K     | -0.0220052 | 0.0042728 |
| GPKOW      | -0.0153051 | 0.0043068 |
| UQCRB      | -0.1423255 | 0.0043191 |
| CCDC117    | -0.0318373 | 0.0043276 |
| PIK3C2A    | -0.075505  | 0.0043338 |
| ARPC1A     | 0.0197732  | 0.004352  |
| C8orf33    | 0.0048782  | 0.0043529 |
| WDR92      | 0.0057907  | 0.0043537 |
| CHST13     | -0.0186204 | 0.0043636 |
| UBXN7      | -0.0466019 | 0.0043638 |
| PRPF8      | -0.0308978 | 0.0043692 |
| FLOT2      | 0.0341623  | 0.0043965 |
| CYBC1      | 0.0053572  | 0.0044065 |
| JADE3      | 0.0171499  | 0.0044243 |
| CSGALNAC   | -0.0751665 | 0.0044252 |
| SNRPD1     | 0.1699756  | 0.004431  |
| ZNF32      | -0.0037014 | 0.004433  |
| MTERF1     | -0.0222588 | 0.0044514 |
| SH3GL1     | -0.055989  | 0.0044646 |
| ETFRF1     | 0.0437128  | 0.0044646 |
| PIP4P1     | -0.0519534 | 0.0045008 |

|            |            |           |
|------------|------------|-----------|
| VPS36      | -0.0573451 | 0.0045009 |
| FAM210A    | 0.0177742  | 0.0045122 |
| NSMCE2     | 0.0268872  | 0.0045277 |
| WDR5       | 0.0091335  | 0.0045277 |
| EFR3A      | -0.0256213 | 0.0045303 |
| USF2       | -0.0971903 | 0.0045344 |
| UBE2W      | -0.0339358 | 0.0045429 |
| ANKRD50    | -0.0514767 | 0.0045513 |
| ACTB       | -0.1481549 | 0.0045546 |
| CEP19      | -0.0569668 | 0.0045703 |
| ZNF808     | -0.0100101 | 0.0045705 |
| C6orf47    | 0.0004695  | 0.0045985 |
| ZNF335     | -0.0082428 | 0.0045985 |
| CWF19L2    | -0.0817772 | 0.0046163 |
| C3orf62    | -0.0184561 | 0.0046252 |
| RABGAP1L   | -0.0358331 | 0.0046385 |
| ARHGAP1    | -0.0263882 | 0.0046474 |
| SELENOO    | -0.0228155 | 0.0046508 |
| FBL        | -0.0035516 | 0.0046608 |
| DEF6       | -0.011059  | 0.004661  |
| PAN3-AS1   | -0.0219992 | 0.0046766 |
| USP47      | 0.0055791  | 0.0046841 |
| AC074032.1 | -0.0237924 | 0.004689  |
| LIMK2      | -0.0036045 | 0.0046955 |
| SART1      | -0.0287508 | 0.0046972 |
| PPME1      | 0.0248339  | 0.004702  |
| SLC25A20   | -0.0334307 | 0.0047097 |
| ASMTL      | 0.0150011  | 0.0047136 |
| BOLA2      | -0.0572389 | 0.0047314 |
| TCTE3      | -0.0132903 | 0.0047439 |
| GPATCH3    | -0.0181038 | 0.00476   |
| SOS1       | -0.0898852 | 0.0047627 |
| FAM104B    | 0.0121347  | 0.0047706 |
| RBAK       | -0.0302644 | 0.0047934 |
| AC245060.5 | -0.1768928 | 0.0047984 |
| PDXK       | 0.0052865  | 0.0048066 |
| TMEM230    | -0.0421552 | 0.0048175 |
| ZNF587B    | -0.0270409 | 0.0048349 |
| ANKIB1     | -0.0457227 | 0.0048547 |
| HDHD2      | -0.0172543 | 0.0048569 |
| NUP37      | 0.0367721  | 0.0048579 |
| TBP        | -0.0419933 | 0.0048621 |
| ARL3       | 0.0093442  | 0.0048692 |
| ZNF276     | -0.0530039 | 0.0048732 |
| FAM89A     | 0.0807691  | 0.0048753 |
| AL049840.2 | 0.0091689  | 0.0048764 |
| KATNA1     | 0.0260384  | 0.0048862 |
| BRD4       | -0.022946  | 0.0048976 |
| SFXN4      | 0.0621763  | 0.0049015 |
| CCDC125    | -0.0507685 | 0.0049126 |

|            |            |           |
|------------|------------|-----------|
| ZBTB41     | -0.0360283 | 0.0049235 |
| GPR107     | -0.0207519 | 0.0049331 |
| ELMOD3     | -0.0253089 | 0.0049361 |
| ARRDC5     | -0.0326551 | 0.0049461 |
| PUM2       | -0.1157959 | 0.0049542 |
| AL451085.2 | -0.0115888 | 0.0049582 |
| PHF12      | -0.0421119 | 0.0049673 |
| NDFIP1     | 0.1164877  | 0.004971  |
| ZNF70      | 0.000633   | 0.0049743 |
| GIPC1      | 0.0349804  | 0.0049873 |
| IQCG       | -0.0339642 | 0.0049875 |
| TEX2       | -0.035234  | 0.0049977 |
| KDSR       | -0.0168567 | 0.0050432 |
| MOSPD3     | -0.0352866 | 0.0050465 |
| TSGA10     | -0.0638898 | 0.0050479 |
| POLM       | 0.0073641  | 0.0050497 |
| KARS       | 0.0272531  | 0.0050852 |
| YRDC       | 0.0883367  | 0.0050919 |
| PCBP2-OT1  | -0.0291383 | 0.0050921 |
| MGLL       | -0.034137  | 0.005104  |
| MARC1      | -0.0386804 | 0.0051326 |
| INTS6      | 0.0910633  | 0.0051434 |
| SHLD2      | -0.0493188 | 0.0051573 |
| ZNF787     | 0.0247022  | 0.0051922 |
| TTC19      | 0.0695792  | 0.0051926 |
| MAPK9      | -0.0699862 | 0.005231  |
| ZNHIT3     | 0.0302955  | 0.0052499 |
| SDHAF4     | -0.0494003 | 0.00528   |
| HDAC6      | -0.0637411 | 0.0052826 |
| EGLN2      | 0.0187437  | 0.0052972 |
| PARP9      | 0.0573651  | 0.005299  |
| NUP133     | 0.0033868  | 0.0053003 |
| RPAP3      | -0.0122506 | 0.0053018 |
| ABHD15     | -0.0347201 | 0.005314  |
| PSMC2      | -0.0602727 | 0.0053188 |
| TTC21B     | -0.0308543 | 0.0053252 |
| TMC6       | -0.0275549 | 0.0053499 |
| PAFAH1B3   | 0.0821469  | 0.0053907 |
| TMEM131L   | -0.0012403 | 0.0054255 |
| BCL2L1     | 0.030956   | 0.0054623 |
| PFDN4      | 0.0246809  | 0.0054657 |
| RFWD3      | -0.0048991 | 0.0054833 |
| MEPCE      | 0.0292815  | 0.0054843 |
| KDM4C      | -0.0478068 | 0.0054893 |
| KHNYN      | -0.0172259 | 0.005511  |
| CKAP2      | -0.1342044 | 0.0055217 |
| ABHD4      | 0.0144039  | 0.0055355 |
| ILF3       | 0.029109   | 0.0055369 |
| AC002454.1 | 0.0443458  | 0.0055628 |
| ABRAXAS2   | 0.0072467  | 0.0055671 |

|            |            |           |
|------------|------------|-----------|
| ZNF436-AS1 | -0.0120533 | 0.0055702 |
| C12orf29   | -0.0127487 | 0.0055772 |
| FAM50A     | 0.0155378  | 0.0055798 |
| PPHLN1     | -0.0427664 | 0.0055799 |
| ARRB2      | 0.138179   | 0.0056001 |
| TMCC1-AS1  | 0.0068568  | 0.0056021 |
| ZNF720     | -0.0029293 | 0.0056054 |
| ABHD17B    | 0.023747   | 0.0056075 |
| TRAPPC3    | -0.0412708 | 0.0056096 |
| FIP1L1     | 0.0148498  | 0.0056151 |
| AGAP2      | 0.0214129  | 0.0056198 |
| METRN      | 0.0712665  | 0.0056555 |
| CDC37L1    | 0.0187637  | 0.0056866 |
| GCDH       | -0.0010502 | 0.0056923 |
| GPR135     | -0.0015682 | 0.0057014 |
| ZFP62      | 0.0282476  | 0.0057086 |
| CLPX       | -0.0052482 | 0.0057141 |
| DDX1       | 0.0224787  | 0.0057281 |
| CSF1R      | 0.0838104  | 0.0057423 |
| ARMCX6     | 0.0742472  | 0.0057428 |
| UXS1       | 0.0651809  | 0.0057705 |
| NCOR2      | -0.0555507 | 0.0057781 |
| EWSR1      | -0.0794687 | 0.0057805 |
| GBA        | -0.0067113 | 0.0057854 |
| PLEKHA8    | -0.0359987 | 0.0057984 |
| RPN2       | 0.1016278  | 0.0058062 |
| ZNF263     | 0.0046102  | 0.0058121 |
| SAMD9      | 0.031658   | 0.0058244 |
| TMEM222    | -0.0010693 | 0.0058323 |
| IFI6       | 0.0272914  | 0.0058619 |
| SMAGP      | -0.023688  | 0.0058744 |
| PSME2      | 0.0059083  | 0.005875  |
| GLMP       | -0.0071723 | 0.0059113 |
| PLBD2      | -0.0418626 | 0.0059234 |
| ANKRD39    | 0.0116977  | 0.0059236 |
| PELP1      | 0.002229   | 0.0059344 |
| YEATS4     | 0.0525738  | 0.0059441 |
| AC022150.4 | -0.0187905 | 0.0059876 |
| POLR2M     | -0.0572772 | 0.0059904 |
| SIN3A      | -0.0578663 | 0.0059971 |
| CTSG       | 0.1707443  | 0.0059972 |
| COLGALT1   | 0.0075691  | 0.0060007 |
| STARD4     | -0.0208218 | 0.006022  |
| CDK8       | -0.0245447 | 0.0060497 |
| SDAD1      | -0.0040109 | 0.0060571 |
| RAP2B      | -0.0491886 | 0.0060681 |
| DHRS12     | 0.0480328  | 0.0060763 |
| MED13      | -0.0821755 | 0.0060929 |
| REPS1      | -0.0437267 | 0.0060933 |
| VAMP4      | -0.0204253 | 0.0060942 |

|            |            |           |
|------------|------------|-----------|
| PAPOLA     | -0.094686  | 0.0060957 |
| ITM2C      | 0.1950241  | 0.0061207 |
| ATG16L1    | -0.0117852 | 0.0061242 |
| KPNB1      | 0.0960533  | 0.0061242 |
| ADRB2      | -0.1011984 | 0.0061593 |
| HLX        | 0.0854964  | 0.0061908 |
| A2M-AS1    | 0.0453755  | 0.0061909 |
| TCHP       | 0.0412578  | 0.0062008 |
| UBE2H      | -0.0175709 | 0.0062072 |
| CALU       | 0.0129522  | 0.0062075 |
| RRAGA      | -0.03736   | 0.0062663 |
| TFPT       | 0.0449098  | 0.0062706 |
| KIAA0930   | -0.1088729 | 0.0062806 |
| EXOC6      | 0.041726   | 0.0063147 |
| MRPS24     | 0.0937749  | 0.006319  |
| GDI2       | -0.1752252 | 0.0063275 |
| TACC1      | 0.0480598  | 0.0063328 |
| FAM210B    | -0.0452392 | 0.0063445 |
| SKP2       | -0.006121  | 0.0063525 |
| SNHG4      | -0.0192771 | 0.0063536 |
| CSTF3      | -0.0169082 | 0.0063562 |
| NASP       | 0.1211303  | 0.0063724 |
| GRWD1      | 0.0277347  | 0.0063868 |
| PARK7      | 0.1386776  | 0.0063878 |
| EXTL2      | -0.0258778 | 0.0063901 |
| AC107375.1 | -0.0235337 | 0.0063933 |
| PIGP       | 0.0109193  | 0.006409  |
| CCDC115    | -0.0328474 | 0.0064241 |
| HMBOX1     | -0.0647956 | 0.006429  |
| CRTAP      | 0.0491122  | 0.0064441 |
| HMGN1      | -0.1456099 | 0.0064505 |
| RABL6      | 0.0554154  | 0.0064576 |
| AC069243.1 | -0.0219771 | 0.0064793 |
| STYX       | -0.0579047 | 0.0064901 |
| LENG9      | -0.0461044 | 0.0065152 |
| NEMF       | -0.0004177 | 0.006527  |
| VPS35L     | -0.0061534 | 0.0065339 |
| BX664615.2 | -0.0085223 | 0.0065358 |
| HEBP1      | 0.0067446  | 0.0065997 |
| RTCA       | -0.0192085 | 0.0066052 |
| ANAPC5     | -0.1438453 | 0.0066081 |
| MIRLET7BH  | -0.0354091 | 0.006617  |
| LUC7L2     | 0.0326023  | 0.0066175 |
| TRIM23     | -0.0149384 | 0.0066182 |
| UBE2G2     | -0.0066382 | 0.0066238 |
| FCF1       | -0.0710965 | 0.0066309 |
| APOBEC3D   | -0.0347561 | 0.0066362 |
| IARS2      | 0.0020461  | 0.0066362 |
| FAM13A     | 0.0438961  | 0.0066468 |
| CARD6      | 0.0059755  | 0.0066687 |

|            |            |           |
|------------|------------|-----------|
| TMEM120B   | -0.0473992 | 0.0067032 |
| LIPT1      | 0.0270757  | 0.0067066 |
| MCFD2      | 0.0106152  | 0.0067125 |
| COPB2      | 0.0378001  | 0.0067139 |
| TMEM208    | 0.0858519  | 0.0067261 |
| MCM3AP-AS1 | -0.0020717 | 0.0067297 |
| LRRC61     | -0.0091215 | 0.0067397 |
| RFC2       | 0.0083142  | 0.0067408 |
| SNX4       | -0.0682642 | 0.0067422 |
| DYNLT1     | 0.065903   | 0.0067534 |
| C2orf74    | -0.0317153 | 0.0067589 |
| RUNX1      | -0.1122775 | 0.0067598 |
| SCLT1      | -0.0212722 | 0.0067673 |
| IMMP2L     | 0.0312918  | 0.0067784 |
| EHBP1L1    | -0.0178044 | 0.0067834 |
| EEF1AKMT2  | -0.0485994 | 0.0068003 |
| AC068888.2 | -0.0207604 | 0.0068011 |
| PPP1R7     | 0.0298199  | 0.0068044 |
| EMSY       | -0.0437226 | 0.0068064 |
| MEF2D      | 0.0267954  | 0.0068532 |
| C16orf86   | 0.0283934  | 0.0068685 |
| ULK1       | -0.0308586 | 0.0068977 |
| DBF4       | -0.0340202 | 0.0069027 |
| UBL7-AS1   | 0.0241449  | 0.0069056 |
| DIS3L2     | 0.0031117  | 0.0069445 |
| TTC32      | 0.0126995  | 0.0069456 |
| SEC24B     | -0.0281596 | 0.0069461 |
| SLC25A13   | -0.0361681 | 0.007021  |
| GOLGA8Q    | -0.0192984 | 0.0070316 |
| MFF        | 0.0147492  | 0.0070322 |
| UQCRFS1    | 0.063536   | 0.0070342 |
| CDK9       | -0.0020137 | 0.0070367 |
| SUPT3H     | 0.0131338  | 0.0070698 |
| CXCL3      | 0.1767119  | 0.0070815 |
| MUS81      | -0.0402255 | 0.0070867 |
| RC3H2      | -0.0331358 | 0.0071122 |
| RNF7       | 0.1353769  | 0.0071157 |
| GLUD1      | -0.0074762 | 0.0071492 |
| SPPL2B     | 0.0708097  | 0.0071516 |
| WDR73      | 0.0282151  | 0.0071547 |
| METTL8     | 0.0003275  | 0.0071614 |
| RAD17      | -0.0428165 | 0.0071614 |
| USP32      | 0.0175669  | 0.0071782 |
| TAB3       | -0.0344808 | 0.0071858 |
| AC036176.1 | -0.006297  | 0.0071881 |
| KDM3A      | -0.0439932 | 0.0071951 |
| SLC37A1    | 0.0159966  | 0.0071957 |
| DPY30      | 0.0577973  | 0.0072191 |
| LINC02384  | 0.0201595  | 0.0072213 |
| EIPR1      | 0.0096179  | 0.0072217 |

|            |            |           |
|------------|------------|-----------|
| PI4KB      | 0.0091488  | 0.0072353 |
| TMEM101    | -0.0058673 | 0.0072373 |
| CPSF2      | -0.019582  | 0.0072656 |
| IVNS1ABP   | -0.0274671 | 0.0073538 |
| CMAS       | 0.0655675  | 0.0073571 |
| MDN1       | -0.0220168 | 0.0073586 |
| ISYNA1     | 0.0087753  | 0.0074055 |
| MT1X       | 0.0252066  | 0.0074062 |
| AC027682.4 | -0.036152  | 0.007419  |
| ANP32B     | 0.1994004  | 0.0074346 |
| DDR GK1    | 0.0460217  | 0.0074769 |
| DNAJC3-DT  | -0.0246402 | 0.0074777 |
| CDK2       | 0.0164259  | 0.0075019 |
| CHML       | -0.1217647 | 0.0075055 |
| ACTN4      | 0.0281489  | 0.0075154 |
| KLHDC4     | 0.0189724  | 0.0075156 |
| AZIN1      | -0.0817704 | 0.0075205 |
| YPEL2      | 0.0098073  | 0.0075601 |
| MZF1       | 0.0202158  | 0.0075919 |
| SOX18      | 0.0839225  | 0.0075934 |
| UBE2R2     | 0.0104275  | 0.0075999 |
| TMF1       | 0.1602076  | 0.0076208 |
| MAP3K1     | -0.0364557 | 0.0076303 |
| LIG3       | -0.0401813 | 0.0076377 |
| NDUFB3     | 0.0407286  | 0.0076424 |
| TANK       | -0.0825059 | 0.0076896 |
| MARCH8     | 0.0365991  | 0.0077015 |
| DHX37      | -0.0500452 | 0.0077042 |
| ATF4       | 0.0764802  | 0.0077104 |
| TIMM8A     | 0.0555485  | 0.0077603 |
| SCARB2     | 0.0176925  | 0.0077872 |
| WDR45      | 0.0079912  | 0.0077941 |
| GNPNAT1    | -0.0009861 | 0.0077965 |
| ERO1A      | -0.0420444 | 0.0078365 |
| WBP1L      | -0.0302921 | 0.0078409 |
| CCDC71L    | 0.0093913  | 0.0078725 |
| AKIRIN2    | 0.0586698  | 0.0078828 |
| ZNF100     | -0.0334532 | 0.007884  |
| COPS2      | 0.0034816  | 0.0079344 |
| COMTD1     | 0.058204   | 0.0079372 |
| MTHFD2     | -0.0173888 | 0.0079534 |
| HARS       | -0.0134933 | 0.0079605 |
| TRAF3IP2-A | -0.0073423 | 0.0079621 |
| SWSAP1     | -0.0056067 | 0.0079699 |
| CA5B       | -0.0345283 | 0.0079818 |
| CHFR       | -0.092761  | 0.0079952 |
| ANKRD36    | -0.0935903 | 0.0079999 |
| ATN1       | 0.0026389  | 0.0080034 |
| TOR1AIP1   | -0.1015123 | 0.0080119 |
| ZNF397     | -0.0563172 | 0.0080122 |



|            |            |           |
|------------|------------|-----------|
| SETX       | 0.0487774  | 0.0080225 |
| CDC5L      | 0.0645203  | 0.0080271 |
| LINC00665  | 0.008355   | 0.0080298 |
| OSBPL11    | -0.0169762 | 0.0080348 |
| AC097376.3 | -0.0095601 | 0.0080393 |
| KDM3B      | -0.0546792 | 0.008041  |
| TMEM185B   | 0.0177471  | 0.0080738 |
| TUSC2      | -0.0135945 | 0.008083  |
| ATL2       | -0.0739788 | 0.0081463 |
| RPS6KB2    | 0.0227367  | 0.00816   |
| DDX10      | -0.0064377 | 0.0081741 |
| PLSCR1     | -0.0204969 | 0.0081885 |
| CPNE1      | -0.0137894 | 0.0081897 |
| ZNF638     | -0.0614271 | 0.0081961 |
| PRPF18     | -0.0420928 | 0.0081997 |
| PIDD1      | 0.0167235  | 0.0082238 |
| SLC35A4    | 0.0169792  | 0.0082238 |
| PER1       | 0.0459347  | 0.0082376 |
| ZNF467     | 0.0817244  | 0.0082506 |
| CPNE3      | 0.0894184  | 0.0082817 |
| BAX        | 0.0276241  | 0.0082877 |
| SHC1       | 0.0144772  | 0.0083327 |
| FAM222B    | 0.0221823  | 0.0083402 |
| ASXL2      | 0.0001101  | 0.0083821 |
| TGFBRAP1   | 0.0242597  | 0.0084117 |
| NUFIP1     | 0.0307898  | 0.0084491 |
| CDK5RAP3   | 0.0108961  | 0.0084803 |
| IQCH-AS1   | -0.0485664 | 0.0085005 |
| SLC25A30   | -0.0291952 | 0.0085083 |
| KIF5B      | -0.0593338 | 0.0085156 |
| RIPK1      | -0.0134842 | 0.0085682 |
| MTRF1      | -0.0343613 | 0.0085846 |
| ZNF419     | 0.0022418  | 0.0085964 |
| PDE12      | 0.0283041  | 0.0085971 |
| POLR2J     | 0.0114853  | 0.0086095 |
| TAX1BP1    | -0.1955695 | 0.0086123 |
| ANGEL2     | -0.0559351 | 0.0086184 |
| IFNAR1     | -0.0611641 | 0.0086231 |
| DEFB1      | -0.0635314 | 0.0086291 |
| SNHG21     | -0.0247341 | 0.0086316 |
| ACTR10     | -0.0415874 | 0.008632  |
| AC025171.3 | -0.0107003 | 0.0086358 |
| MDM2       | -0.0356043 | 0.0086683 |
| GRIPAP1    | 0.0035351  | 0.0086812 |
| LRRC34     | -0.0001135 | 0.0086821 |
| USP11      | -0.0230761 | 0.0087109 |
| ZNF850     | -0.0059444 | 0.0087477 |
| DECR1      | 0.0449304  | 0.008755  |
| SBNO2      | -0.029346  | 0.0087779 |
| S100A8     | 0.0935626  | 0.0087782 |

|            |            |           |
|------------|------------|-----------|
| ARHGAP22   | 0.1355841  | 0.0087843 |
| ATP1A1     | -0.0425603 | 0.0088031 |
| NCK2       | 0.0316782  | 0.0088075 |
| UBE2K      | -0.088457  | 0.0088169 |
| MEIS1      | -0.0845    | 0.0088253 |
| RBM42      | -0.0387011 | 0.0088316 |
| GLTP       | -0.0054867 | 0.0088443 |
| SERPINB9   | 0.1047199  | 0.0088471 |
| TEP1       | 0.004153   | 0.0088836 |
| LRSAM1     | 0.017529   | 0.0088876 |
| TFRC       | -0.0419953 | 0.008945  |
| AGPS       | 0.0023818  | 0.0089458 |
| CHAF1A     | 0.0657089  | 0.0089471 |
| APH1A      | -0.0204166 | 0.0089616 |
| AAMDC      | 0.0259594  | 0.0089761 |
| NDUFA5     | -0.0720385 | 0.0089803 |
| TERF2      | 0.0167403  | 0.0089827 |
| UBA5       | 0.0155049  | 0.0089847 |
| TYW3       | 0.0877791  | 0.0089885 |
| AP003068.2 | -0.0435502 | 0.0089938 |
| AC138649.1 | -0.0990845 | 0.0089959 |
| MAP4K5     | 0.0210591  | 0.0090084 |
| ST3GAL3    | 0.0146981  | 0.0090649 |
| USP21      | -0.0128456 | 0.0090689 |
| DENND4B    | -0.0395359 | 0.0090798 |
| IP6K1      | 0.0415431  | 0.0091253 |
| ZNF557     | -0.004961  | 0.0091265 |
| TM2D1      | -0.0946078 | 0.0091277 |
| ARHGEF19   | -0.0293428 | 0.0091356 |
| GAS6-AS1   | -0.0337218 | 0.0091653 |
| SEPTIN2    | -0.1127277 | 0.0092013 |
| CDC40      | 0.0033614  | 0.0092286 |
| DDHD1      | -0.0448417 | 0.0092369 |
| CFAP44     | -0.0170762 | 0.009247  |
| DCP1B      | 0.0041904  | 0.0092509 |
| MRPS15     | 0.0444346  | 0.0092569 |
| AC074117.1 | -0.0299649 | 0.0092632 |
| NR1H2      | 0.0231947  | 0.0092794 |
| GSTCD      | -0.021683  | 0.0093055 |
| PTGDS      | 0.4304982  | 0.0093114 |
| ZNF324B    | 0.0040178  | 0.0093196 |
| TELO2      | -0.0004942 | 0.0093235 |
| AC005332.3 | -0.0248866 | 0.0093379 |
| OSER1-DT   | 0.0139906  | 0.0093695 |
| MIIP       | -0.0098451 | 0.0093762 |
| HSD17B12   | -0.0925272 | 0.0094046 |
| SF3B2      | 0.0345258  | 0.0094216 |
| CYCS       | 0.0494453  | 0.0094278 |
| ZNF804A    | -0.0492301 | 0.009433  |
| P2RX1      | -0.0405025 | 0.0094519 |

|            |            |           |
|------------|------------|-----------|
| COIL       | 0.0380133  | 0.0094538 |
| MKS1       | 0.0067049  | 0.0094795 |
| SOCS5      | -0.0191296 | 0.0094987 |
| SBNO1-AS1  | 0.1039365  | 0.0095004 |
| INTS13     | 0.0813763  | 0.0095037 |
| SDE2       | 0.0710902  | 0.0095295 |
| FBXL18     | -0.0424035 | 0.0095416 |
| MAD1L1     | 0.0178305  | 0.0095542 |
| AC010615.2 | -0.0332332 | 0.0095961 |
| C18orf32   | -0.1144877 | 0.0096024 |
| TMX2       | 0.0199598  | 0.0096044 |
| HEXB       | 0.0206473  | 0.0096069 |
| PDIA3      | -0.0752115 | 0.0096384 |
| TXNL4A     | 0.0592177  | 0.0096508 |
| VMA21      | -0.0021077 | 0.009653  |
| IL10RB     | -0.0298985 | 0.0096599 |
| HPF1       | 0.0737675  | 0.0096724 |
| MARCH2     | -0.0388039 | 0.0097114 |
| PIGL       | -0.0272766 | 0.0097233 |
| THAP2      | -0.0051903 | 0.0097559 |
| VPS35      | 0.0033684  | 0.0097762 |
| GYG1       | 0.0210422  | 0.0097763 |
| PSMB7      | 0.0916695  | 0.0097894 |
| SH3PXD2A   | -0.0389962 | 0.0097942 |
| CEP192     | -0.0373897 | 0.0098038 |
| AGXT       | 0.1644024  | 0.009816  |
| LEPROT     | 0.0085371  | 0.009824  |
| CIAO2A     | -0.0158668 | 0.0098501 |
| ABCE1      | 0.1278321  | 0.0098556 |
| ZNF544     | -0.0035048 | 0.0098782 |
| UBE2A      | -1.619E-05 | 0.0098984 |
| BECN1      | 0.0098387  | 0.0099107 |
| RFC3       | 0.0314532  | 0.0099463 |
| BTBD1      | -0.0285667 | 0.0099476 |
| DCTN6      | 0.0165791  | 0.0099635 |
| NANOS3     | -0.0301725 | 0.0100275 |
| KIAA1958   | -0.0804564 | 0.0100288 |
| AC018638.7 | -0.0177366 | 0.010042  |
| SAMSN1     | -0.1164468 | 0.0100752 |
| SNRNP48    | -0.0521751 | 0.0100819 |
| NBEAL1     | -0.0545083 | 0.0100911 |
| AP1G2      | -0.0184855 | 0.0101245 |
| KLHL6      | -0.0121055 | 0.0101357 |
| ZBED1      | -0.0538057 | 0.0101661 |
| RBMXL1     | -0.0196044 | 0.0101801 |
| RTF2       | 0.045123   | 0.0102096 |
| PHRF1      | -0.0157946 | 0.0102096 |
| DYNC1LI2   | -0.0296599 | 0.0102258 |
| FUZ        | 0.0690933  | 0.0102274 |
| ZNF468     | -0.0181972 | 0.0102379 |

|            |            |           |
|------------|------------|-----------|
| URGCP      | 0.0037988  | 0.0102391 |
| MFSD12     | -0.0091219 | 0.01025   |
| ANKS1A     | -0.0024775 | 0.0102554 |
| ZC3H4      | -0.0483914 | 0.0102605 |
| TMEM19     | -0.0342171 | 0.0102767 |
| RFK        | 0.0324963  | 0.0102961 |
| UIMC1      | -0.0430316 | 0.0103206 |
| IFI44      | 0.0817168  | 0.0103251 |
| ZNHIT6     | -0.0218555 | 0.0103313 |
| PRR5       | 0.0643337  | 0.0103343 |
| UBE2T      | 0.0267978  | 0.0103618 |
| AC006059.1 | -0.0415313 | 0.0103647 |
| EPN1       | 0.0392015  | 0.0103767 |
| FTSJ3      | 0.0222009  | 0.0103896 |
| GLRX       | 0.1229757  | 0.0104419 |
| AC073896.2 | -0.0222412 | 0.0104439 |
| DCTN2      | 0.0434936  | 0.0104654 |
| XPO7       | -0.0642403 | 0.0104896 |
| METTTL23   | -0.0106598 | 0.0104972 |
| RNF115     | -0.0263214 | 0.0105126 |
| ATIC       | -0.0162074 | 0.0105366 |
| SLIRP      | -0.02898   | 0.0105927 |
| GOSR2      | -0.0022672 | 0.010598  |
| B9D2       | 0.0285626  | 0.0106136 |
| HDAC8      | -0.0689934 | 0.0106545 |
| MARCH6     | -0.0584584 | 0.0106712 |
| ZNF92      | -0.0150569 | 0.0106721 |
| KPNA6      | -0.0229158 | 0.010677  |
| NDUFS6     | 0.115716   | 0.0107413 |
| SIGMAR1    | 0.0045279  | 0.0107671 |
| KLHL2      | 0.0177774  | 0.0107733 |
| TUG1       | 0.0007025  | 0.0107919 |
| BTN3A1     | 0.0047663  | 0.0108418 |
| STAG2      | 0.0167601  | 0.0108557 |
| CWC27      | 0.070174   | 0.010901  |
| ZNF16      | -0.016291  | 0.0109114 |
| PARP8      | 0.0013674  | 0.0109344 |
| ZNF805     | 0.004289   | 0.0109423 |
| PRKAG2     | 0.0138021  | 0.0109533 |
| AC144521.1 | -0.0322141 | 0.010959  |
| GABARAPL2  | -0.07787   | 0.0109922 |
| CLIC2      | 0.0404574  | 0.0110047 |
| ALKBH8     | 0.029431   | 0.0110138 |
| KLHL18     | 0.0715088  | 0.0110667 |
| MICAL3     | -0.0021597 | 0.0110825 |
| CHD8       | -0.0457636 | 0.0110865 |
| NAMPT      | 0.0408486  | 0.0111023 |
| HERC4      | -0.0899352 | 0.0111042 |
| SCARF1     | 0.0453125  | 0.0111346 |
| LCOR       | -0.0214139 | 0.0112363 |

|            |            |           |
|------------|------------|-----------|
| KANK2      | 0.0552974  | 0.0112702 |
| HACD4      | 0.1463926  | 0.0112758 |
| LTBP4      | -0.0118839 | 0.011281  |
| AKAP8L     | -0.0291954 | 0.0112856 |
| ADNP       | -0.0127559 | 0.0112884 |
| RFXAP      | 0.0405148  | 0.0113402 |
| LHPP       | -0.0043615 | 0.0113437 |
| JPT1       | 0.0243933  | 0.011344  |
| ZNF800     | 0.0368292  | 0.0113877 |
| WAC        | -0.0343584 | 0.0113904 |
| ECSIT      | 0.023206   | 0.0114659 |
| LINC00539  | -0.0137166 | 0.0114913 |
| TRIM5      | -0.0239832 | 0.0115174 |
| ACO1       | -0.0312023 | 0.0115536 |
| FKBP4      | 0.1034684  | 0.0115861 |
| GSKIP      | -0.0133567 | 0.0115907 |
| ETF1       | 0.0419926  | 0.0116269 |
| AC005072.1 | -0.0291265 | 0.0116324 |
| FAHD1      | 0.0173859  | 0.0116454 |
| ZNF664     | -0.0015338 | 0.0116703 |
| LINC00641  | -0.038211  | 0.0116882 |
| ATG2A      | -0.0054421 | 0.0117087 |
| SLC25A28   | 0.0651475  | 0.0117138 |
| CDC42EP3   | -0.0373032 | 0.011717  |
| GNAQ       | -0.068545  | 0.0117448 |
| RHBDF1     | 0.0536494  | 0.0117636 |
| SIAH2      | 0.0687269  | 0.0117948 |
| PER2       | 0.0039503  | 0.0118052 |
| STRADB     | 0.0153194  | 0.0118061 |
| SF3B5      | 0.0412726  | 0.011822  |
| NDUFAF1    | 0.0155746  | 0.0118375 |
| BLMH       | -0.0067198 | 0.0118501 |
| ARL1       | 0.003943   | 0.0118674 |
| PPP2R5A    | 0.0512409  | 0.0118968 |
| AL450384.2 | -0.0161272 | 0.0119254 |
| ASB16-AS1  | -0.0293269 | 0.0119605 |
| SLC10A3    | -0.0287378 | 0.0119998 |
| MIR181A1HC | -0.0221536 | 0.0120066 |
| TMED7      | -0.0216629 | 0.0120598 |
| CCNB1IP1   | -0.0654011 | 0.0120776 |
| CARS       | -0.0277885 | 0.0120907 |
| GPR174     | 0.1552836  | 0.0120919 |
| VEZT       | 0.0134616  | 0.0121006 |
| BCL2L12    | 0.0226882  | 0.012145  |
| RAB5A      | -0.0041073 | 0.012148  |
| MED16      | 0.0215108  | 0.0122374 |
| BOLA1      | 0.0411445  | 0.0122522 |
| AC105285.1 | 0.0131146  | 0.0123085 |
| HMGCR      | -0.0748134 | 0.0123118 |
| ZFAND3     | -0.0919299 | 0.0123175 |

|            |            |           |
|------------|------------|-----------|
| BTN3A2     | 0.040901   | 0.0123311 |
| NIPSNAP2   | -0.0733964 | 0.0123493 |
| CGGBP1     | -0.1049861 | 0.0123862 |
| BAZ1B      | -0.0085925 | 0.0124003 |
| PHF14      | -0.0775774 | 0.0124208 |
| C16orf91   | 0.0190306  | 0.0125319 |
| NEIL2      | 0.022971   | 0.0125353 |
| NUDCD3     | -0.0304368 | 0.0125445 |
| RAB7B      | -0.0563188 | 0.0125813 |
| ZNHIT1     | -0.0293256 | 0.0125933 |
| ATRN       | -0.040257  | 0.0126722 |
| S100PBP    | -0.065266  | 0.0127054 |
| PLPP5      | 0.034564   | 0.012709  |
| TNPO1      | -0.0888277 | 0.012715  |
| RETREG3    | -0.0285415 | 0.0127787 |
| ZNF35      | -0.0007744 | 0.0127882 |
| ARAF       | -0.0261888 | 0.0128546 |
| NUP188     | -0.0184975 | 0.0128646 |
| WASHC2A    | -0.1202095 | 0.0128702 |
| ANKRD16    | 0.0411512  | 0.0129107 |
| AC084198.2 | -0.0039261 | 0.0129552 |
| STX12      | 0.009438   | 0.0129612 |
| ITGAV      | -0.0390861 | 0.0129613 |
| DGKZ       | -0.0625043 | 0.0129986 |
| LYSMD3     | -0.0605999 | 0.0130345 |
| DNASE1     | -0.0534853 | 0.0130347 |
| SLC43A3    | 0.0514373  | 0.0130488 |
| METTTL2B   | -0.0088334 | 0.0130639 |
| ZNF395     | -0.0149461 | 0.0130786 |
| TRIM21     | -0.0153619 | 0.01309   |
| MAVS       | 0.0058555  | 0.0131121 |
| CCNL2      | -0.0400646 | 0.0131409 |
| TRAF6      | 0.0005854  | 0.0131619 |
| MROH1      | -0.0308894 | 0.0131721 |
| RGS14      | 0.0264519  | 0.0131737 |
| RNF114     | -0.0744083 | 0.0131774 |
| LRRC8C-DT  | 0.0259862  | 0.0131918 |
| TMEM170B   | -0.0656851 | 0.0132005 |
| RCOR3      | -0.098383  | 0.0132057 |
| RALY       | 0.0488704  | 0.0132114 |
| ARHGEF3    | -0.026297  | 0.0132531 |
| SMG6       | -0.0190138 | 0.0132681 |
| PAXX       | 0.0247085  | 0.0132705 |
| WWC3       | -0.0542602 | 0.0132756 |
| HDGF       | -0.1104308 | 0.0132804 |
| PAK1       | 0.1230328  | 0.0133091 |
| NTMT1      | 0.0005978  | 0.0133492 |
| ASH2L      | -0.0118539 | 0.0133512 |
| SNAP47     | 0.0529158  | 0.0133518 |
| BID        | -0.1040088 | 0.0133772 |

|            |            |           |
|------------|------------|-----------|
| ZBTB21     | 0.0058069  | 0.0133897 |
| THUMPD2    | -0.0509254 | 0.0134084 |
| ANKRA2     | -0.066641  | 0.0134122 |
| CTCF       | 0.0289493  | 0.0134162 |
| COX20      | -0.0609629 | 0.0134238 |
| XRN1       | -0.0829954 | 0.0134742 |
| ZNF669     | -0.0219833 | 0.0135098 |
| IFIH1      | -0.0353456 | 0.0135751 |
| SGSM3      | 0.0136585  | 0.0135843 |
| AP3D1      | -0.0268478 | 0.0135888 |
| PKM        | 0.0681563  | 0.0135991 |
| GPRC5D-AS  | 0.0049811  | 0.0137438 |
| GTDC1      | -0.0255887 | 0.0137554 |
| KIN        | 0.0454881  | 0.0137863 |
| RSAD1      | -0.0160805 | 0.0138052 |
| CAPN10     | -0.0126153 | 0.0138269 |
| MTM1       | -0.0401    | 0.0138277 |
| ARFGEF2    | -0.0635593 | 0.0138328 |
| DYNLRB1    | -0.0788952 | 0.0138611 |
| RUNX2      | 0.0078254  | 0.0139083 |
| ENOPH1     | -0.0131825 | 0.013915  |
| DDX47      | -0.0176352 | 0.0139255 |
| SLC9A8     | -0.0249567 | 0.013967  |
| SMCHD1     | -0.1181188 | 0.013985  |
| RAB11FIP1  | 0.1621497  | 0.0139963 |
| SLC12A6    | -0.1148799 | 0.0140558 |
| MCRS1      | -0.0265968 | 0.0140651 |
| SUPT16H    | 0.0668886  | 0.0140871 |
| AC015871.4 | -0.0404734 | 0.0140875 |
| BUD13      | -0.0141087 | 0.0140975 |
| FAM120B    | -0.0138109 | 0.0141212 |
| EXOSC7     | 0.0287286  | 0.0141488 |
| AP000873.2 | 0.0230566  | 0.0141917 |
| AC243960.1 | 0.0941316  | 0.0141932 |
| AC006213.2 | -0.0394294 | 0.0142238 |
| ACTA2      | 0.0942569  | 0.0142297 |
| GPR89B     | -0.0425027 | 0.0142955 |
| NMI        | -0.0441753 | 0.0143269 |
| ZNF268     | -0.0353403 | 0.0143518 |
| NABP2      | 0.0184247  | 0.014379  |
| MACROD1    | 0.0326547  | 0.0143822 |
| EIF2B4     | -0.0385587 | 0.0144306 |
| C20orf194  | -0.0122451 | 0.0144474 |
| C10orf95   | -0.0528597 | 0.0144627 |
| PHAX       | 0.0170386  | 0.0145554 |
| GANC       | -0.019135  | 0.0145558 |
| TTC9C      | -0.0345252 | 0.0145778 |
| SMIM12     | 0.0007966  | 0.0145881 |
| NOL10      | 0.0088776  | 0.0145909 |
| ZNF699     | 0.0041798  | 0.0146283 |

|            |            |           |
|------------|------------|-----------|
| FAM91A1    | -0.0284291 | 0.0146876 |
| KIAA1191   | -0.0366233 | 0.014731  |
| POLR2K     | -0.0629166 | 0.0147978 |
| XIAP       | -0.0636241 | 0.0148143 |
| MRPS36     | -0.0346004 | 0.0148358 |
| MLYCD      | 0.0020139  | 0.0148381 |
| TPST2      | 0.0630102  | 0.0148453 |
| OSBPL1A    | 0.0404169  | 0.0148802 |
| INPP5D     | -0.0780375 | 0.0148887 |
| PSMB8-AS1  | 0.0923506  | 0.0149469 |
| FBXO34     | -0.0058274 | 0.0149682 |
| SZRD1      | 0.002638   | 0.0150042 |
| CRK        | -0.0401724 | 0.0150158 |
| ATPAF2     | -0.0147302 | 0.0150401 |
| ZNF562     | -0.0483892 | 0.0150405 |
| COX11      | 0.0047469  | 0.0151246 |
| INPPL1     | -0.0374219 | 0.0151369 |
| NEU1       | 0.0501272  | 0.0151502 |
| LGALS3BP   | 0.1271434  | 0.0151584 |
| GTF3C5     | 0.0153775  | 0.0151818 |
| STK11IP    | 0.0274342  | 0.0152088 |
| SQLE       | -0.039004  | 0.0152441 |
| ERO1B      | -0.0606174 | 0.0152444 |
| VCL        | 0.1321305  | 0.0152586 |
| SDCBP      | -0.0573946 | 0.0152835 |
| LINC00528  | -0.018544  | 0.0153018 |
| RTN2       | 0.0537479  | 0.0153629 |
| DCUN1D5    | 0.0654268  | 0.0153776 |
| MIS12      | -0.0135092 | 0.0154306 |
| CBR4       | -0.0500127 | 0.0154377 |
| NIP7       | 0.0589339  | 0.0154384 |
| TOGARAM1   | 0.0114368  | 0.0154616 |
| TATDN2     | -0.020439  | 0.0154653 |
| WSB2       | -0.017835  | 0.0154763 |
| CHORDC1    | 0.014901   | 0.0155177 |
| APOL6      | 0.0267201  | 0.0155293 |
| HNRNPF     | 0.0457526  | 0.0155311 |
| NMB        | 0.0631316  | 0.0155764 |
| HACE1      | -0.0217829 | 0.0155923 |
| AC108519.1 | -0.0151604 | 0.0156129 |
| SMCR5      | -0.0296989 | 0.015689  |
| INVS       | -0.0133548 | 0.015712  |
| AC106707.1 | -0.0045793 | 0.0157199 |
| MTO1       | -0.0427548 | 0.0157406 |
| SNHG10     | 0.0264563  | 0.015938  |
| CFP        | 0.0724491  | 0.0160449 |
| PKN1       | -0.0177471 | 0.0161407 |
| TRMU       | -0.0012979 | 0.0161963 |
| TMC8       | -0.0253955 | 0.0162991 |
| RSPRY1     | 0.0109501  | 0.0164106 |



|            |            |           |
|------------|------------|-----------|
| RBM15B     | -0.0174614 | 0.0164415 |
| LRRC40     | -0.035247  | 0.0164858 |
| CDK16      | -0.0148713 | 0.0166179 |
| ERMP1      | 0.0061061  | 0.0166413 |
| TAOK3      | -0.1205775 | 0.0167346 |
| RUVBL1     | 0.0918015  | 0.0168188 |
| NFKBID     | 0.0640624  | 0.0168511 |
| MPHOSPH6   | -0.0440124 | 0.0168581 |
| ACYP1      | 0.0289943  | 0.0168683 |
| ZNF708     | -0.0561908 | 0.0169162 |
| FXR2       | -0.0155859 | 0.0169388 |
| GTF2IRD1   | -0.0198262 | 0.0169444 |
| DNM2       | -0.0456325 | 0.0170078 |
| ABCB10     | -0.0205032 | 0.0170084 |
| LINC02256  | -0.065991  | 0.0170264 |
| EZH1       | 0.0151379  | 0.0170278 |
| AL353622.1 | -0.0403449 | 0.0170436 |
| C5orf24    | -0.0463987 | 0.017046  |
| LENG8      | -0.058204  | 0.0170534 |
| NDUFAF6    | -0.0148994 | 0.017097  |
| DNAJC7     | 0.0745124  | 0.0171122 |
| NAP1L4     | -0.023985  | 0.0171288 |
| CANX       | -0.0999028 | 0.017153  |
| POT1       | -0.0365388 | 0.0171571 |
| ARL11      | -0.0212611 | 0.0171713 |
| PABPC4     | -0.0578745 | 0.0171756 |
| NET1       | -0.0073583 | 0.017185  |
| GGA1       | 0.0009844  | 0.0172299 |
| ALKBH2     | 0.018407   | 0.0172947 |
| GCAT       | 0.0422051  | 0.0173119 |
| SUOX       | -0.0155478 | 0.0173674 |
| SHMT2      | 0.0306494  | 0.0173924 |
| TMEM39A    | 0.0008317  | 0.0174345 |
| PTGS1      | -0.0579703 | 0.0174441 |
| ATP5MG     | -0.1386326 | 0.0174463 |
| CCNYL1     | -0.044974  | 0.0174662 |
| CCDC138    | 0.0078604  | 0.0174674 |
| ZNF791     | -0.0452099 | 0.0175084 |
| MOB4       | -0.030013  | 0.0175607 |
| EEF1E1     | 0.0081216  | 0.0176068 |
| KAT6A      | -0.0692203 | 0.0176862 |
| PPP1R11    | -0.040203  | 0.0176902 |
| UBTF       | -0.0895185 | 0.017694  |
| FAM136A    | 0.0485027  | 0.017715  |
| NAA38      | 0.0650387  | 0.017792  |
| PA2G4      | 0.1803334  | 0.0177975 |
| BCAP31     | 0.110998   | 0.0178441 |
| CWF19L1    | -0.0430515 | 0.0179282 |
| LINC00205  | -0.0160993 | 0.0179339 |
| SLC25A12   | 0.0112962  | 0.017977  |

|          |            |           |
|----------|------------|-----------|
| TNFAIP1  | -0.014691  | 0.0179875 |
| KAT2A    | 0.0003838  | 0.0179896 |
| SNX11    | -0.0286356 | 0.018001  |
| ZBTB6    | 0.0192541  | 0.0180018 |
| ZKSCAN3  | 0.0058078  | 0.0180127 |
| VPS37B   | 0.0514601  | 0.0180151 |
| AURKAIP1 | 0.1035871  | 0.0180603 |
| C12orf73 | 0.0661739  | 0.0180615 |
| CSK      | 0.0165805  | 0.0180975 |
| PTMA     | -0.1059171 | 0.0182126 |
| PRPF39   | -0.0076349 | 0.0182149 |
| LUC7L    | -0.0480731 | 0.0182404 |
| RAB14    | -0.0312208 | 0.0182567 |
| GARS     | 0.0448978  | 0.0182654 |
| CCDC57   | 0.0703051  | 0.0184098 |
| DUT      | 0.2219765  | 0.0184357 |
| F11R     | -0.0502068 | 0.0184448 |
| CEP152   | -0.0356572 | 0.0185432 |
| IL1RAP   | 0.0942662  | 0.0186654 |
| ZNF257   | -0.0045737 | 0.0186838 |
| ORMDL2   | 0.0559374  | 0.0187141 |
| RNF135   | 0.0008525  | 0.018835  |
| IK       | 0.0072523  | 0.0188826 |
| SHLD1    | 0.0039744  | 0.0189199 |
| ITPR1    | -0.0668363 | 0.0189269 |
| MCCC2    | -0.0001341 | 0.0189316 |
| TNPO2    | -0.0245001 | 0.0189347 |
| RPS6KA5  | -0.0548431 | 0.019015  |
| IRF8     | -0.1238935 | 0.0190192 |
| SUMF2    | -0.0935097 | 0.0190687 |
| TSC22D3  | 0.1531634  | 0.0191085 |
| LACTB    | -0.0897914 | 0.0192181 |
| ELOC     | -0.0446185 | 0.0192271 |
| TOR1B    | -0.0127658 | 0.0192521 |
| PSMD13   | 0.09067    | 0.0192551 |
| ZNF212   | -0.0092557 | 0.0192553 |
| PLAU     | -0.0086123 | 0.0192941 |
| CPOX     | -0.0023656 | 0.019297  |
| GPANK1   | 0.0119733  | 0.0193688 |
| RNF187   | 0.0196805  | 0.0193887 |
| NUBP2    | -0.0040181 | 0.0193895 |
| RABEP2   | -0.0080925 | 0.0194655 |
| ACAD10   | -0.0138265 | 0.0194754 |
| ZNF777   | 0.005622   | 0.0194884 |
| SRF      | -0.021742  | 0.019618  |
| DNAJB1   | -0.0395771 | 0.0196784 |
| DENND4C  | -0.0186881 | 0.0196935 |
| ACIN1    | 0.0064201  | 0.0197344 |
| KCTD2    | -0.0241148 | 0.0197526 |
| SLC35C2  | -0.0269493 | 0.0197653 |

|            |            |           |
|------------|------------|-----------|
| SNF8       | 0.0480479  | 0.0197719 |
| WDR37      | -0.0292359 | 0.0198884 |
| TFCP2      | -0.0627828 | 0.0198891 |
| TOR2A      | -0.0041163 | 0.019968  |
| ZDHHC3     | -0.0060193 | 0.0199804 |
| PPIL2      | -0.0433142 | 0.0200499 |
| PEX10      | 0.0196824  | 0.0201196 |
| ASCC3      | 0.069971   | 0.0201811 |
| RUSC2      | 0.0125768  | 0.0202725 |
| ABCG1      | 0.0812498  | 0.0202932 |
| ALMS1      | 0.0065765  | 0.0203792 |
| MFN2       | -0.0188477 | 0.0205007 |
| HAUS4      | 0.0472479  | 0.0205507 |
| SCP2       | -0.0972694 | 0.0205854 |
| AC007262.2 | -0.0555834 | 0.0206709 |
| JOSD2      | 0.0667521  | 0.0207049 |
| COP1       | -0.005486  | 0.0207658 |
| ZDHHC23    | 0.0073959  | 0.0207953 |
| ZNF226     | -0.03051   | 0.0208062 |
| PLEKHM3    | -0.0596549 | 0.0208289 |
| AC009404.1 | -0.0310992 | 0.020836  |
| UBE2V2     | -0.0181241 | 0.0208368 |
| YIPF1      | -0.0198547 | 0.020846  |
| GAPT       | -0.1421217 | 0.0208463 |
| RASA3      | -0.0816911 | 0.0209605 |
| ILF2       | 0.0088144  | 0.02109   |
| DTNBP1     | 0.0369412  | 0.021179  |
| SH3BP2     | 0.0522012  | 0.0212057 |
| TSC22D1    | 0.1313307  | 0.0212212 |
| DRAM1      | 0.0188206  | 0.0212347 |
| FAM120C    | 0.0152608  | 0.021249  |
| RPP40      | 0.0139423  | 0.0212728 |
| CPD        | -0.0516892 | 0.0213658 |
| FBXL3      | -0.0096193 | 0.0213844 |
| USF1       | -0.0180563 | 0.0214112 |
| ZNF655     | -0.0239238 | 0.0214283 |
| SYS1       | 0.0066594  | 0.0215085 |
| ZNF316     | 0.0060981  | 0.0215754 |
| ZNF195     | -0.0846093 | 0.0215886 |
| CMTR2      | -0.0309506 | 0.0216092 |
| ZNF836     | -0.0163768 | 0.0217178 |
| MMP28      | 0.0400211  | 0.0217337 |
| QDPR       | 0.0569291  | 0.021766  |
| COA6-AS1   | -0.0078622 | 0.0217906 |
| DCTN1      | -0.0234456 | 0.0218297 |
| ZNF169     | -0.0090607 | 0.0218666 |
| RNF13      | 0.0271213  | 0.0219109 |
| KANSL2     | -0.0039732 | 0.0219569 |
| RBM34      | -0.0606733 | 0.0219765 |
| SNRNP200   | -0.0379856 | 0.0220161 |

|            |            |           |
|------------|------------|-----------|
| RNF213     | 0.0460865  | 0.0220247 |
| UBE2D4     | 0.0191884  | 0.0220413 |
| MYC        | 0.3020218  | 0.0220492 |
| MBNL3      | -0.0874147 | 0.0221259 |
| SLC2A13    | -0.0278717 | 0.022141  |
| ANKMY2     | 0.0049473  | 0.0222203 |
| LY75       | -0.0947605 | 0.0223186 |
| SLC52A2    | 0.0314949  | 0.0223191 |
| SCCPDH     | -0.0014117 | 0.0223354 |
| MOSMO      | 0.0113393  | 0.0223861 |
| PLPBP      | 0.0088127  | 0.0223874 |
| MRPS33     | 0.0592918  | 0.0224236 |
| PRKRIP1    | 0.0106105  | 0.0224507 |
| CREM       | -0.041671  | 0.0224601 |
| TAP2       | -0.034578  | 0.022531  |
| AC060780.1 | -0.0372234 | 0.0226038 |
| POLR1C     | 0.0013458  | 0.022613  |
| PBRM1      | -0.1384704 | 0.0226189 |
| FBXO25     | -0.0635017 | 0.0226351 |
| WDR76      | 0.0570052  | 0.0226601 |
| GNAI2      | 0.149108   | 0.0226877 |
| AC010618.3 | -0.0206686 | 0.0226926 |
| CYTH4      | 0.0872881  | 0.0226961 |
| TMEM106C   | 0.0703032  | 0.0227449 |
| NBPF9      | -0.0332676 | 0.0227826 |
| TMEM129    | 0.0142952  | 0.0228004 |
| VHL        | -0.0223595 | 0.022836  |
| CBR1       | 0.0809256  | 0.0228461 |
| FAM98C     | 0.0004153  | 0.0228773 |
| ETAA1      | 0.0041273  | 0.0228906 |
| SMAD4      | -0.0303434 | 0.0229396 |
| PIP4K2B    | -0.0091724 | 0.0229543 |
| SELL       | 0.1064402  | 0.0229838 |
| POLR2D     | -0.0694614 | 0.023011  |
| GSTM2      | 0.0251745  | 0.023013  |
| PAAF1      | -0.0315234 | 0.0230534 |
| BACE1      | 0.071602   | 0.0230715 |
| NAT9       | 0.0077518  | 0.0230907 |
| TMEM141    | 0.0897783  | 0.0231603 |
| LNPK       | -0.0244534 | 0.023183  |
| OAZ2       | 0.0253707  | 0.0231878 |
| VTA1       | -0.0342074 | 0.0232334 |
| SCARB1     | -0.0208548 | 0.0232422 |
| PET117     | -0.0480248 | 0.0232947 |
| MPHOSPH9   | -0.0122679 | 0.0233247 |
| TM9SF2     | -0.0382093 | 0.0234316 |
| SERPINF1   | -0.0644773 | 0.0234716 |
| UBTD2      | 0.0161363  | 0.0235173 |
| COG4       | -0.0314693 | 0.0235184 |
| ZNF738     | -0.055316  | 0.023621  |

|            |            |           |
|------------|------------|-----------|
| NOC2L      | 0.0218097  | 0.023628  |
| DPPA4      | -0.1455586 | 0.0236618 |
| TMUB1      | 0.0607158  | 0.0236876 |
| PCNX4      | -0.1507228 | 0.0237631 |
| CEP164     | 0.0311828  | 0.0238042 |
| ACTR6      | 0.017803   | 0.0239304 |
| STXBP3     | -0.1192049 | 0.0239802 |
| CMC1       | 0.0433978  | 0.0239992 |
| TOMM22     | 0.0004745  | 0.024088  |
| SEC16A     | -0.0282856 | 0.0240942 |
| FAM184B    | -0.0257714 | 0.0241272 |
| GLE1       | -0.0065114 | 0.0241455 |
| SMDT1      | 0.1055526  | 0.024176  |
| CUL9       | -0.0256382 | 0.0242213 |
| CAPN15     | 0.0139139  | 0.0243304 |
| PURB       | -0.0524912 | 0.024378  |
| USP3       | 0.0078147  | 0.0243899 |
| ZNF211     | 0.0079162  | 0.0244087 |
| TAF7       | -0.1220923 | 0.0244318 |
| ATP2B1     | 0.1303782  | 0.0244766 |
| AIMP2      | 0.0251956  | 0.0244837 |
| MROH6      | -0.0313909 | 0.0245296 |
| GTF2H2     | -0.0692045 | 0.0245983 |
| RGPD5      | -0.0213344 | 0.0246305 |
| PPAT       | 0.0485431  | 0.0246317 |
| AKAP13     | 0.0460144  | 0.0246772 |
| PPP2R5D    | -0.0223275 | 0.0246896 |
| ABHD5      | -0.056083  | 0.0247206 |
| DPCD       | 0.0289966  | 0.0247211 |
| CASD1      | -0.018295  | 0.0247236 |
| SLC25A19   | 0.0130326  | 0.0248063 |
| PDCD11     | 0.0053812  | 0.0248239 |
| SMCO4      | 0.0249544  | 0.0249524 |
| ABCB7      | -0.0342721 | 0.0249918 |
| NEDD4      | 0.0619803  | 0.0249922 |
| AC244090.1 | -0.0069513 | 0.0251076 |
| CARD16     | 0.0185327  | 0.0252969 |
| SAP130     | -0.0227674 | 0.0253032 |
| ATXN1L     | -0.0107531 | 0.0256204 |
| ATP5PB     | 0.0633554  | 0.0256511 |
| MRPS6      | 0.0540674  | 0.025691  |
| PLAC8      | 0.1908455  | 0.025717  |
| NPHP3      | -0.0479278 | 0.0257635 |
| FAM229B    | 0.0562593  | 0.0257918 |
| TOM1L1     | 0.0277752  | 0.0258357 |
| CTDNEP1    | 0.0056153  | 0.0259453 |
| CD9        | -0.5442613 | 0.0260597 |
| IFFO1      | -0.0197587 | 0.0261266 |
| CLTB       | 0.0311695  | 0.0261366 |
| ZFYVE21    | -9.235E-05 | 0.0261532 |

|            |            |           |
|------------|------------|-----------|
| PTCD2      | 0.0110636  | 0.026188  |
| E2F5       | 0.044448   | 0.0262686 |
| QRSL1      | -0.0377312 | 0.0262852 |
| SPATA7     | 0.0018638  | 0.0264043 |
| SBDS       | 0.0541161  | 0.0265137 |
| CATSPER2   | -0.0489758 | 0.0265689 |
| HPS1       | -0.070887  | 0.02661   |
| HSPA8      | 0.2164709  | 0.0266267 |
| NCBP1      | -0.0307438 | 0.026636  |
| MORN2      | 0.0084337  | 0.0266785 |
| AC005562.1 | -0.0275119 | 0.0267903 |
| G6PC3      | 0.0542114  | 0.0268095 |
| PRUNE1     | -0.0034722 | 0.0268154 |
| SGTA       | -0.0173516 | 0.0268917 |
| EHMT1      | -0.0098777 | 0.0269489 |
| UBE2O      | -0.0017517 | 0.0269991 |
| SEC24C     | -0.0269706 | 0.0270204 |
| BAP1       | -0.0236413 | 0.0270779 |
| Z93930.2   | 0.0248335  | 0.0270831 |
| U91328.1   | -0.0259804 | 0.0273347 |
| FGD4       | 0.0764461  | 0.027364  |
| AC009403.1 | 0.0059451  | 0.0274454 |
| ACTR3B     | -0.0104388 | 0.0274636 |
| EMC4       | -0.0624726 | 0.027471  |
| C18orf21   | -0.0211227 | 0.0275296 |
| NDUFS8     | 0.0456985  | 0.027541  |
| MBLAC2     | 0.0257311  | 0.0275497 |
| SPAST      | -0.0654532 | 0.0275889 |
| FHIT       | -0.0038561 | 0.0276671 |
| PABPN1     | -0.0350968 | 0.0276717 |
| AC015712.2 | -0.0017322 | 0.0277181 |
| ERMARD     | -0.0312169 | 0.0277242 |
| TAB1       | -0.0061704 | 0.0277298 |
| PRDM11     | -0.003982  | 0.0278152 |
| CRNKL1     | 0.002844   | 0.0278353 |
| CWC25      | 0.068214   | 0.0278535 |
| PIK3R5     | -0.0462139 | 0.0280463 |
| RNF139-AS' | -0.0129494 | 0.0280767 |
| CWC22      | 0.0372433  | 0.0280858 |
| TMED4      | 0.0815589  | 0.028309  |
| ZNRD2      | 0.0365285  | 0.0283253 |
| DEPDC1B    | 0.0543734  | 0.0283794 |
| ZCRB1      | 0.1016908  | 0.0284406 |
| TSPAN33    | 0.1019662  | 0.0284751 |
| LMAN1      | 0.1325789  | 0.0284758 |
| C2orf49    | -0.0469164 | 0.0284942 |
| AGBL3      | -0.0223059 | 0.0285549 |
| PRDM16-DT  | -0.0758553 | 0.0286396 |
| RAB24      | -0.0217553 | 0.0286722 |
| NUDT22     | 0.0244013  | 0.028681  |

|            |            |           |
|------------|------------|-----------|
| DDX39B     | 0.0867818  | 0.0286982 |
| TBCC       | 0.0374411  | 0.0288319 |
| ZBTB14     | -0.0186868 | 0.0289734 |
| OCLN       | -0.0837926 | 0.028974  |
| KIF13A     | 0.0484772  | 0.0290133 |
| CEBPZ      | 0.0380598  | 0.0291526 |
| NUDT19     | 0.0055504  | 0.0291878 |
| LINC00672  | -0.0040896 | 0.0292151 |
| TEX30      | 0.0492004  | 0.0292822 |
| EIF6       | 0.0614748  | 0.0293196 |
| MIEN1      | -0.0004255 | 0.0293215 |
| FAM8A1     | 0.0092084  | 0.029337  |
| ETHE1      | 0.0553469  | 0.029374  |
| C5orf22    | -0.0129212 | 0.0293852 |
| ZBTB46     | 0.0098411  | 0.0294683 |
| AC024060.2 | -0.0410167 | 0.0294913 |
| DDX42      | 0.0106115  | 0.0295218 |
| SLC50A1    | 0.0815557  | 0.0296309 |
| TMEM187    | -0.0081921 | 0.0297012 |
| TRRAP      | -0.0415996 | 0.0297027 |
| ZBTB20     | -0.2618545 | 0.0297085 |
| PSMD5      | -0.0218037 | 0.0297804 |
| NSA2       | -0.1952888 | 0.029868  |
| SETD4      | -0.0146959 | 0.0298732 |
| EHMT2      | -0.0181392 | 0.0299502 |
| RPS6KC1    | -0.0189182 | 0.029954  |
| ERG28      | -0.0189807 | 0.0300699 |
| APBB1IP    | 0.0903063  | 0.0303446 |
| PRKCQ-AS1  | 0.0332667  | 0.030375  |
| MUTYH      | 0.0206743  | 0.0305355 |
| ZNF444     | 0.0436916  | 0.0305459 |
| ATP5F1D    | 0.1669613  | 0.0306893 |
| C4orf46    | -0.0494383 | 0.0306917 |
| ADIPOR2    | -0.062334  | 0.0307572 |
| ARID1B     | -0.1081836 | 0.0307766 |
| ATG7       | -0.051039  | 0.0309182 |
| MAFIP      | -0.0303466 | 0.0309278 |
| CLUH       | 0.0088523  | 0.0309985 |
| C1orf174   | -0.0709267 | 0.0310106 |
| EEF2K      | 0.0154385  | 0.0311218 |
| WAPL       | -0.0421269 | 0.0311552 |
| HSPB1      | 0.1985642  | 0.0312637 |
| HINT3      | -0.0626929 | 0.0312954 |
| SERINC3    | -0.0684414 | 0.0313787 |
| PIK3R2     | -0.0160845 | 0.0314314 |
| SAAL1      | -0.0122876 | 0.0317754 |
| CYP51A1    | -0.0597357 | 0.0318035 |
| TARS2      | -0.0030114 | 0.031805  |
| SETD1A     | -0.016006  | 0.0318317 |
| BTBD3      | -0.0087656 | 0.0318356 |

|            |            |           |
|------------|------------|-----------|
| SOS2       | -0.159036  | 0.0321393 |
| FEZ2       | 0.0050731  | 0.0321731 |
| ITGB1      | -0.0669341 | 0.0323002 |
| KRAS       | 0.0186199  | 0.032382  |
| ZYG11B     | -0.0248715 | 0.0323947 |
| TRPC4AP    | 0.0037145  | 0.0325109 |
| ARV1       | -0.0013891 | 0.0326117 |
| DNMT3B     | 0.0344045  | 0.0327165 |
| TRIM73     | -0.0787615 | 0.0327205 |
| PYURF      | 0.0443985  | 0.0327252 |
| GMDS       | 0.0115358  | 0.0327466 |
| ST8SIA4    | -0.0529048 | 0.0328385 |
| MLX        | 0.0074217  | 0.0329132 |
| GDE1       | -0.0002662 | 0.032935  |
| RALBP1     | 0.1159165  | 0.0329636 |
| SEC61A2    | 0.0020511  | 0.0330507 |
| BTBD6      | -0.0135935 | 0.0331257 |
| PREX1      | 0.0018821  | 0.033178  |
| CUL4B      | 0.00023    | 0.0331998 |
| AMFR       | -0.0507435 | 0.0332547 |
| LINC01341  | 0.0148493  | 0.033291  |
| TRIM22     | 0.0651635  | 0.0333455 |
| MED12L     | -0.0567146 | 0.0333561 |
| AC006504.5 | -0.0897706 | 0.0333661 |
| ABI2       | 0.116524   | 0.0334681 |
| ENTPD4     | -0.0484072 | 0.0335398 |
| AC104162.2 | -0.0279784 | 0.0336059 |
| SERINC1    | -0.0247664 | 0.0337206 |
| ADPGK      | -0.0607041 | 0.033769  |
| WASHC5     | -0.0319894 | 0.0338046 |
| UCK2       | 0.0310913  | 0.0338572 |
| SNAPIN     | 0.0034013  | 0.0338791 |
| ADGRG5     | 0.0168428  | 0.033905  |
| RNF6       | -0.0161111 | 0.0339894 |
| MORC2      | -0.027284  | 0.0339895 |
| LUZP1      | 0.0832629  | 0.0340493 |
| AC017083.1 | 0.0137431  | 0.0340837 |
| CDK14      | -0.0529057 | 0.0341872 |
| PAXBP1     | -0.0582671 | 0.0341964 |
| AC124283.1 | -5.448E-05 | 0.034209  |
| SLA2       | 0.0137974  | 0.0342603 |
| UBE2E2     | 0.068454   | 0.0344634 |
| MAPK1      | -0.0724787 | 0.0345233 |
| ROGDI      | 0.0703949  | 0.0345745 |
| AIG1       | 0.0365201  | 0.0346189 |
| MACO1      | -0.0186836 | 0.034899  |
| BSDC1      | -0.0065786 | 0.0349211 |
| BMT2       | -0.0430615 | 0.0349951 |
| RHNO1      | 0.0048694  | 0.0350737 |
| CCT7       | 0.0708544  | 0.0352048 |



|            |            |           |
|------------|------------|-----------|
| AP3S1      | 0.0299463  | 0.0352383 |
| VWA5A      | -0.0958117 | 0.0352757 |
| ASB6       | 0.0035828  | 0.035376  |
| MIATNB     | -0.0295167 | 0.0354085 |
| HEXIM1     | -0.0327188 | 0.0354842 |
| SMIM10L1   | -0.044845  | 0.0355104 |
| GOLGA3     | -0.0488749 | 0.0355756 |
| PRMT1      | -0.0330222 | 0.0356254 |
| BUB3       | -0.0089802 | 0.0356527 |
| LINC01138  | -0.0485342 | 0.0356634 |
| CHD1L      | -0.0534432 | 0.0357104 |
| GSS        | 0.0075346  | 0.0357608 |
| BLOC1S5    | -0.0504094 | 0.0357621 |
| ATP5F1E    | -0.1267786 | 0.0357786 |
| SMYD3      | -0.0016316 | 0.0358438 |
| MICU2      | -0.0573746 | 0.0358948 |
| NIPA2      | -0.0132355 | 0.0359447 |
| ZKSCAN5    | -0.019782  | 0.0359607 |
| CIRBP      | 0.1889585  | 0.0360211 |
| DOCK8      | -0.0452119 | 0.0360782 |
| ZNF688     | 0.0163298  | 0.0361098 |
| C3orf80    | -0.0740974 | 0.0361876 |
| RCSD1      | 0.0052508  | 0.0362873 |
| HELLS      | 0.1470921  | 0.0364175 |
| SETD9      | -0.0099156 | 0.0364795 |
| LRRC27     | -0.0191274 | 0.0365347 |
| NKAPD1     | -0.0460347 | 0.0365394 |
| USP8       | -0.054262  | 0.0366045 |
| YTHDF2     | -0.0039173 | 0.0366615 |
| MIS18A     | 0.0275672  | 0.036692  |
| ASCC2      | -0.0738673 | 0.0367495 |
| NIT1       | -0.0218587 | 0.0368291 |
| SEC31A     | -0.0464428 | 0.0369133 |
| MEF2C-AS1  | 0.0442784  | 0.0369646 |
| PPP6R2     | -0.0016596 | 0.0369765 |
| APOBEC3F   | 0.0030556  | 0.0369835 |
| CENPW      | 0.0396283  | 0.0370616 |
| ZNF592     | -0.0458279 | 0.0370847 |
| AC007325.4 | -0.0169375 | 0.0371911 |
| ORC5       | -0.0146396 | 0.0372122 |
| PIAS2      | -0.1207573 | 0.0373388 |
| GHITM      | -0.1019308 | 0.0376464 |
| FBXW7      | 0.0232053  | 0.0377708 |
| CEP76      | -0.0556204 | 0.0377738 |
| FRAT2      | 0.02873    | 0.0379285 |
| DOP1A      | -0.0418982 | 0.0379511 |
| TFPI       | 0.0430156  | 0.0379601 |
| CNBP       | 0.108057   | 0.0379831 |
| KIF20B     | 0.058887   | 0.0379889 |
| NUDT18     | 0.0252429  | 0.0381254 |

|          |            |           |
|----------|------------|-----------|
| KCTD18   | -0.0137223 | 0.038191  |
| ETFDH    | -0.029483  | 0.0382573 |
| GNAS     | -0.1353145 | 0.0383071 |
| RIMKLB   | 0.0282148  | 0.0383217 |
| ILDR2    | 0.009169   | 0.0384247 |
| ATP23    | -0.0322411 | 0.0384473 |
| TMEM43   | -0.0567548 | 0.0384514 |
| TINF2    | 0.0222752  | 0.0386084 |
| ZNF48    | -0.0051278 | 0.0386518 |
| ICOSLG   | -0.0373805 | 0.0386841 |
| TXNL1    | -0.0160376 | 0.038704  |
| LPP      | 0.0184975  | 0.0388807 |
| PLXNB2   | 0.0086236  | 0.0392354 |
| PIK3R6   | 0.0231861  | 0.0392723 |
| PCNP     | -0.0724965 | 0.0394046 |
| PPM1H    | -0.0459032 | 0.0394057 |
| RABAC1   | 0.1745913  | 0.0394378 |
| NSMCE4A  | 0.0270153  | 0.0394525 |
| AHCTF1   | 0.0154938  | 0.0395708 |
| APOL4    | 0.1074546  | 0.039661  |
| UFM1     | -0.0641973 | 0.0396702 |
| INO80    | -0.0011692 | 0.0397406 |
| TRMT6    | 0.00981    | 0.0398838 |
| RAD9A    | -0.0106722 | 0.0399157 |
| ZNF580   | 0.0406991  | 0.0399938 |
| TMEM60   | 0.0343842  | 0.0399993 |
| APOBEC3C | -0.0022724 | 0.0400803 |
| NPRL3    | -0.0058335 | 0.040156  |
| TRIM14   | 0.0514083  | 0.0402432 |
| NCOA1    | -0.0988814 | 0.040252  |
| SOX12    | -0.0343506 | 0.0402566 |
| DNAAF4   | -0.0733506 | 0.0403737 |
| GLOD4    | 0.0059761  | 0.0405366 |
| HERC3    | -0.0177154 | 0.0405394 |
| MYO5A    | -0.0621595 | 0.0405622 |
| NOL4L    | -0.0774182 | 0.0406412 |
| TK2      | 0.0029856  | 0.0406528 |
| HNRNPDL  | 0.1301441  | 0.0408734 |
| SRRD     | 0.0193277  | 0.0410551 |
| TCF20    | -0.0342633 | 0.0411079 |
| RECQL    | -0.0177321 | 0.0411438 |
| Z97192.1 | 0.0078693  | 0.0414034 |
| GSR      | -0.0290356 | 0.0414424 |
| OBSL1    | 0.0151278  | 0.0415508 |
| IL15RA   | -0.0061171 | 0.0416184 |
| SFR1     | -0.0377933 | 0.0416332 |
| ASCC1    | -0.0186267 | 0.0416574 |
| KLHDC2   | -0.0096005 | 0.0417392 |
| WDR34    | 0.0328261  | 0.0418059 |
| CHN2     | -0.0419558 | 0.0419317 |

|            |            |           |
|------------|------------|-----------|
| ATF1       | -0.0207845 | 0.0420556 |
| PTPRC      | 0.1844386  | 0.0421138 |
| CAMK1D     | -0.0778579 | 0.0421384 |
| ZNF727     | -0.0282044 | 0.0421635 |
| FBXO3      | -0.0029995 | 0.0422205 |
| CAMKMT     | -0.0177117 | 0.0424467 |
| AC055822.1 | -0.009426  | 0.0426406 |
| ABCC4      | -0.2060258 | 0.0426646 |
| TMX4       | -0.0383473 | 0.0426679 |
| TMEM147    | 0.0490069  | 0.0426828 |
| RUNDC1     | -0.023516  | 0.0428019 |
| THOP1      | 0.0313018  | 0.0428315 |
| G6PD       | 0.0273085  | 0.0428428 |
| INO80B     | -0.0590126 | 0.0430847 |
| ASB8       | -0.0242261 | 0.0432793 |
| RAD1       | -0.0507514 | 0.0432957 |
| AC007383.2 | -0.0405324 | 0.0432978 |
| DDB2       | 0.0389359  | 0.0433153 |
| NDUFV2-AS  | -0.0383178 | 0.0433204 |
| PRIM2      | -0.0138709 | 0.0433314 |
| AC087473.1 | -0.039806  | 0.0436441 |
| ATL3       | -0.0153038 | 0.0436578 |
| ZFP14      | -0.0285126 | 0.043662  |
| BICD2      | -0.057921  | 0.0437053 |
| NDUFA1     | -0.1177659 | 0.0437091 |
| PXK        | -0.1390427 | 0.0437202 |
| ARRDC4     | 0.0626178  | 0.0437254 |
| CSF2RA     | -0.0561719 | 0.043888  |
| SLITRK4    | 0.115272   | 0.0439215 |
| BOD1       | -0.000454  | 0.0440494 |
| RIOK3      | 0.0903066  | 0.0441519 |
| TAF3       | 0.0694825  | 0.0442267 |
| C2orf76    | -0.0077342 | 0.0443801 |
| HS6ST1     | -0.0843894 | 0.0444703 |
| ITGA6-AS1  | -0.0103897 | 0.044553  |
| DGKG       | 0.0034702  | 0.0445622 |
| CYB5R1     | 0.0400783  | 0.0445907 |
| HPS3       | -0.0053799 | 0.0446327 |
| DNASE2     | -0.0282071 | 0.0446608 |
| NUP155     | -0.0398816 | 0.0447881 |
| PRPF6      | 0.0058038  | 0.0448695 |
| RALGAPB    | -0.0112826 | 0.0449439 |
| HLA-F      | 0.0485195  | 0.0451234 |
| BCDIN3D    | 0.0003157  | 0.0452197 |
| POLR3D     | 0.0714876  | 0.0452376 |
| C3orf38    | 0.0098401  | 0.0454307 |
| ECHDC2     | 0.0232853  | 0.0454459 |
| OXSM       | 0.0226829  | 0.0455366 |
| NKTR       | -0.0902715 | 0.0455694 |
| TIMM22     | -0.0009404 | 0.0456055 |

|            |            |           |
|------------|------------|-----------|
| ADCY3      | -0.0171441 | 0.0456369 |
| TBCD       | 0.0287956  | 0.0457266 |
| CCDC122    | -0.0391637 | 0.0457288 |
| PPIL1      | 0.0040585  | 0.0457298 |
| MVD        | 0.0109798  | 0.0458084 |
| TBCE       | -0.026502  | 0.0458298 |
| VPS26B     | 0.0124741  | 0.0458589 |
| KBTBD6     | 0.0021311  | 0.0459432 |
| RCN1       | 0.0333915  | 0.0459506 |
| ZNF235     | -0.0141367 | 0.0459865 |
| ZNF460     | -0.0236532 | 0.0460478 |
| MED9       | -0.0148532 | 0.0462743 |
| ZNF345     | -0.0378236 | 0.0462962 |
| GTF2E1     | 0.0250421  | 0.0464106 |
| WDR91      | 0.0026962  | 0.0466341 |
| USP24      | -0.0551543 | 0.046904  |
| C1orf35    | 0.0163075  | 0.0469349 |
| UPRT       | -8.514E-05 | 0.046975  |
| ALG10      | -0.0224213 | 0.047396  |
| RCHY1      | 0.0276622  | 0.0475138 |
| DPM1       | -0.0078867 | 0.0475657 |
| IQCK       | -0.0041263 | 0.0475665 |
| IFI35      | 0.0910719  | 0.0477633 |
| TNFSF13    | 0.0255451  | 0.0478122 |
| TCF25      | -0.0221687 | 0.0479243 |
| SLC9A6     | -0.0114936 | 0.0479582 |
| PSMD11     | 0.0159322  | 0.0481471 |
| SEC24A     | -0.0063539 | 0.0482595 |
| FASTKD1    | -0.041809  | 0.0484096 |
| CYSTM1     | -0.003483  | 0.0485776 |
| FASTK      | 0.0401186  | 0.04861   |
| LAMB2      | 0.0426875  | 0.0486795 |
| STYXL1     | 0.0347617  | 0.0487082 |
| ALDH18A1   | 0.0355599  | 0.0487707 |
| SSR4       | 0.1470692  | 0.0488823 |
| DHX32      | -0.0072327 | 0.0488834 |
| CDKN1B     | 0.0458696  | 0.0490451 |
| AC020915.2 | -0.0199813 | 0.0491102 |
| RPIA       | 0.0022792  | 0.049141  |
| UCK1       | 0.0071356  | 0.0491411 |
| FOXJ3      | 0.0194639  | 0.0493773 |
| TOLLIP     | -0.0173513 | 0.0494442 |
| AMMECR1L   | -0.0248889 | 0.0495621 |
| PANX2      | -0.0074166 | 0.0495805 |
| ZNF615     | -0.0283185 | 0.0496729 |
| MIB2       | 0.0206846  | 0.0496749 |
| AL591895.1 | 0.005966   | 0.0497135 |
| HNRNPLL    | -0.0576931 | 0.0497163 |
| REXO4      | -0.0701913 | 0.0497215 |
| PEA15      | -0.019748  | 0.0497398 |

|            |            |           |
|------------|------------|-----------|
| C17orf49   | -0.1732159 | 0.0498214 |
| RAB21      | -0.0347754 | 0.0500621 |
| TBC1D32    | -0.0157433 | 0.0501156 |
| ULK4       | -0.0151916 | 0.0501358 |
| TOP3B      | -0.033027  | 0.0501709 |
| FBXW8      | -0.0041638 | 0.0503684 |
| SLFN11     | 0.0179     | 0.0505563 |
| TMEM209    | -0.0199121 | 0.0508504 |
| COMMD10    | 0.0128573  | 0.0509774 |
| CMIP       | -0.0693798 | 0.0511309 |
| R3HDM2     | -0.1384948 | 0.0511388 |
| MSH2       | 0.0744614  | 0.0513669 |
| BCAT2      | 0.0163424  | 0.0513995 |
| ERCC5      | 0.0039701  | 0.0514325 |
| EIF2S1     | 0.0324428  | 0.0515492 |
| BOLA3      | 0.0282185  | 0.0516512 |
| SAE1       | -0.0163704 | 0.0517108 |
| VAV1       | 0.0428707  | 0.0517156 |
| NUP62      | -0.021322  | 0.0517786 |
| CBY1       | 0.0144713  | 0.0518047 |
| EEFSEC     | 0.0015606  | 0.051905  |
| BRPF1      | -0.0115076 | 0.0519716 |
| URB2       | 0.0038567  | 0.0520853 |
| HSCB       | -0.0353249 | 0.0522114 |
| C1GALT1C1  | -0.0223051 | 0.0523937 |
| ANAPC16    | -0.0512608 | 0.0524127 |
| MARF1      | -0.0543732 | 0.0525256 |
| GFPT1      | -0.02089   | 0.0526858 |
| MAN2A1     | 0.0058674  | 0.0527316 |
| AL356019.2 | -0.029072  | 0.0528379 |
| DDAH2      | 0.0224983  | 0.0528769 |
| FAM126B    | -0.0693916 | 0.0529165 |
| PAXIP1-AS1 | 0.0335163  | 0.0529389 |
| SH2D3C     | 0.0085373  | 0.0529652 |
| DMTF1      | 0.0129664  | 0.0532    |
| MAP2K1     | -0.0009    | 0.0532479 |
| ZDHHC2     | -0.0198039 | 0.0533708 |
| ZNF441     | -0.0236215 | 0.0533996 |
| P2RX5      | -0.1020135 | 0.053411  |
| TRGC1      | 0.0093571  | 0.0534283 |
| ZNF706     | 0.0847126  | 0.0535403 |
| KIT        | -0.1331824 | 0.0535914 |
| SLC29A3    | -0.0110248 | 0.0536561 |
| ZRANB1     | -0.0601573 | 0.0536622 |
| FAM3C      | 0.0042531  | 0.0536636 |
| CENPC      | -0.0736251 | 0.0538979 |
| SRSF10     | 0.0258727  | 0.0539444 |
| GLYR1      | -0.0731889 | 0.0539984 |
| DCAF7      | -0.0699212 | 0.0541691 |
| METTL16    | 0.0067147  | 0.054383  |

|            |            |           |
|------------|------------|-----------|
| PPP2CA     | -0.029037  | 0.054515  |
| USP38      | -0.0309918 | 0.0545517 |
| MRTFA      | -0.0499598 | 0.0546521 |
| FBXO7      | -0.0637865 | 0.054658  |
| WWP1       | -0.016703  | 0.0547571 |
| PARVB      | 0.0859283  | 0.0547586 |
| VPS28      | 0.1369366  | 0.05481   |
| HIST1H1E   | -0.1301623 | 0.0548422 |
| SNAPC5     | 0.0392806  | 0.0548742 |
| GID4       | 0.0054072  | 0.0548971 |
| AC092821.3 | -0.0036063 | 0.0549109 |
| ACAP1      | 0.1694765  | 0.0549268 |
| SRP19      | -0.0346004 | 0.0550123 |
| UTP23      | 0.0310313  | 0.0550971 |
| RHOT2      | -0.0024392 | 0.0551312 |
| RRP1B      | 0.0722789  | 0.0554302 |
| ZNF184     | -0.0460778 | 0.0554618 |
| MCM9       | -0.0273199 | 0.0554727 |
| CEP57      | 0.0424624  | 0.0556412 |
| SNAI3      | -0.0130578 | 0.0556931 |
| IP6K2      | -0.0370283 | 0.0557095 |
| NUDT8      | 0.0892047  | 0.0557173 |
| COA5       | 0.0208955  | 0.0558209 |
| PHKA2      | -0.0563065 | 0.0558724 |
| TSC22D2    | -0.0762322 | 0.0558757 |
| RNASEH1-A  | 0.0301219  | 0.0559146 |
| AC141424.1 | 0.0242654  | 0.05613   |
| MFSD10     | 0.0127031  | 0.0561325 |
| DOP1B      | -0.0531893 | 0.0563674 |
| NHP2       | 0.0999041  | 0.0565206 |
| AC009961.4 | -0.0094086 | 0.0567384 |
| HIST1H2BN  | -0.0330883 | 0.0568618 |
| TAF5L      | -0.0252739 | 0.0569225 |
| MED19      | 0.0209558  | 0.0569308 |
| NR2C1      | -0.0579501 | 0.0573249 |
| MIR17HG    | -0.044775  | 0.0574594 |
| C21orf91   | -0.0434635 | 0.0575608 |
| AC092338.3 | -0.0286971 | 0.057677  |
| SMPDL3B    | 0.0347679  | 0.0577014 |
| CBLB       | 0.0106346  | 0.0577315 |
| GMDS-DT    | -0.0181851 | 0.0577508 |
| TTPAL      | 0.0040802  | 0.0578694 |
| TOMM40L    | 0.0095949  | 0.05787   |
| SNAPC4     | -0.0199315 | 0.0578892 |
| CLUAP1     | 0.0237371  | 0.057901  |
| TAF12      | -0.0002134 | 0.0579587 |
| SKIV2L     | -0.0085069 | 0.0580625 |
| SDF4       | 0.0297363  | 0.0581976 |
| FBXO38     | -0.0216857 | 0.0585444 |
| RPARP-AS1  | -0.0932888 | 0.0586046 |

|            |            |           |
|------------|------------|-----------|
| HBEGF      | 0.0297626  | 0.0586577 |
| NOP16      | 0.052006   | 0.0587359 |
| AMPD3      | -0.0117187 | 0.0588603 |
| PRDX6      | 0.1444122  | 0.0590314 |
| GLI4       | 0.0078619  | 0.0592987 |
| ERLIN1     | -0.0103316 | 0.0595094 |
| KRCC1      | 0.0891847  | 0.0597133 |
| PUS1       | 0.010771   | 0.0598415 |
| BTN2A1     | -0.0380131 | 0.0598423 |
| LRRC23     | 0.0178406  | 0.0598869 |
| ARHGAP11/  | -0.0583545 | 0.059906  |
| STARD3NL   | 0.0265845  | 0.0600087 |
| MITF       | -0.0380612 | 0.0601592 |
| MAEA       | -0.0068091 | 0.0601643 |
| IPPK       | -0.0169466 | 0.0601789 |
| OCIAD2     | 0.0115592  | 0.060203  |
| AIDA       | -0.0014753 | 0.0602225 |
| C2orf92    | 0.0284292  | 0.0602401 |
| WDR3       | 0.0215462  | 0.0603067 |
| ELP1       | -0.0161693 | 0.0604249 |
| FAM168A    | -0.0155894 | 0.0604781 |
| MCCC1      | 0.0384493  | 0.0606139 |
| PEX11B     | -0.0035425 | 0.0606582 |
| ZNF439     | 0.0069828  | 0.0607321 |
| LIPA       | 0.0394858  | 0.0608618 |
| MRPL35     | 0.0341031  | 0.0609033 |
| HS2ST1     | 0.0180102  | 0.0609266 |
| G3BP2      | -0.0018784 | 0.0610345 |
| MRPL10     | 0.0246492  | 0.0610449 |
| NRBF2      | 0.030715   | 0.0610751 |
| MMACHC     | -0.0269021 | 0.0611645 |
| CFAP298    | 0.0729553  | 0.0612068 |
| H1FO       | 0.0829934  | 0.061242  |
| GALNS      | 0.0259754  | 0.0613028 |
| RAPGEF6    | 0.0087978  | 0.0616563 |
| AKAP7      | 0.0643911  | 0.061658  |
| PEBP1      | 0.1666357  | 0.0618894 |
| TNS3       | 0.0900009  | 0.0619337 |
| LIN7C      | -0.0501559 | 0.0621404 |
| RLIM       | -0.0060399 | 0.0621629 |
| PUM3       | 0.0514998  | 0.0622146 |
| FAM219B    | -0.0253383 | 0.0622714 |
| TWISTNB    | 0.1927213  | 0.0623785 |
| HEXA       | 0.045948   | 0.0625429 |
| SLC10A7    | -0.0217129 | 0.0626246 |
| PIGG       | -0.0117506 | 0.0626476 |
| CCDC91     | -0.0055887 | 0.062672  |
| CTPS1      | 0.0061289  | 0.0627024 |
| AC005520.2 | 0.017778   | 0.0628786 |
| BCKDHA     | -0.0032853 | 0.0629358 |

|            |            |           |
|------------|------------|-----------|
| NDUFS1     | -0.1037589 | 0.062936  |
| PTK7       | -0.0280034 | 0.0629666 |
| CCP110     | -0.0109614 | 0.0631649 |
| LRRC37B    | -0.0227558 | 0.063357  |
| REPS2      | 0.0106091  | 0.0634228 |
| C6orf120   | 0.0544881  | 0.0634237 |
| RAB28      | -0.0212716 | 0.0634302 |
| SIDT2      | -0.0146988 | 0.0634625 |
| AC009113.1 | 0.0106213  | 0.0634773 |
| AP5Z1      | -0.0277873 | 0.0634815 |
| CLPB       | -0.0167758 | 0.0635151 |
| YBEY       | -0.0200764 | 0.0636141 |
| LIN37      | 0.0083601  | 0.0636494 |
| TENT5C     | -0.0732044 | 0.0636783 |
| TBC1D31    | 0.0154159  | 0.0639411 |
| AC023157.3 | 0.0407546  | 0.0639431 |
| RTL6       | -0.0331219 | 0.0641945 |
| L3HYPDH    | -0.0075338 | 0.0642334 |
| ZFP64      | -0.0311484 | 0.0644112 |
| GPATCH2    | 0.0073659  | 0.0644886 |
| WDR25      | -0.0159207 | 0.0646777 |
| DNAAF2     | 0.0377055  | 0.0647029 |
| BCAT1      | 0.0932074  | 0.0647184 |
| AL592435.1 | 0.0007481  | 0.0647264 |
| PUS10      | -0.0211089 | 0.064737  |
| NFATC2     | 0.0580596  | 0.0647613 |
| TM2D2      | -0.0238846 | 0.0648742 |
| MTMR14     | -0.0242463 | 0.0649257 |
| TSC1       | -0.0369692 | 0.0649349 |
| PHYH       | 0.0416954  | 0.0649674 |
| ZNF654     | 0.0089389  | 0.0649869 |
| TDG        | -0.064557  | 0.0650654 |
| PIWIL4     | -0.05498   | 0.065141  |
| TRAPPC6A   | 0.0303908  | 0.0652827 |
| RAB11FIP2  | -0.0447199 | 0.0654629 |
| GBP2       | 0.0361555  | 0.0659726 |
| PSMA3-AS1  | -0.1272213 | 0.0659792 |
| C7orf26    | 0.0090091  | 0.0662328 |
| DCUN1D2    | -0.029066  | 0.0663475 |
| AC118549.1 | -0.0228433 | 0.0664436 |
| COX5B      | 0.1508335  | 0.0666551 |
| AAAS       | -0.0186647 | 0.0668601 |
| PDK1       | 0.0414239  | 0.0669024 |
| HIST1H2BD  | -0.0453273 | 0.0669879 |
| ZNF559     | 0.0004886  | 0.0670924 |
| WDR13      | 0.0056635  | 0.067251  |
| ZNF781     | -0.0112564 | 0.0673147 |
| RLF        | -0.0183635 | 0.0674615 |
| GPATCH8    | -0.0374482 | 0.0676649 |
| GCLM       | -0.054935  | 0.0677327 |



|            |            |           |
|------------|------------|-----------|
| HDAC4      | -0.0089108 | 0.0681328 |
| SDCCAG8    | -0.0265842 | 0.0681496 |
| ZNF346     | -0.0010694 | 0.0683128 |
| IRS2       | 0.0111412  | 0.0684343 |
| NFKBIA     | -0.0811245 | 0.0686354 |
| EIF2A      | -0.041532  | 0.0687911 |
| NFKB2      | -0.0477775 | 0.0691426 |
| CRBN       | 0.1364713  | 0.0691955 |
| MTMR10     | -0.0374414 | 0.0693141 |
| KIAA0753   | -0.0037904 | 0.0694067 |
| PSMB10     | -0.1105365 | 0.0694199 |
| AC127035.1 | -0.025901  | 0.0694283 |
| ACOT11     | -0.0243326 | 0.0696361 |
| GAPVD1     | -0.0197165 | 0.0697416 |
| ZNF277     | -0.0472405 | 0.069855  |
| MOCS3      | -0.0095428 | 0.0698956 |
| RMND5A     | -0.0680947 | 0.0700796 |
| IPO9       | -0.0364455 | 0.0701676 |
| SMUG1      | 0.0029284  | 0.0703787 |
| PIAS1      | -0.031242  | 0.0704118 |
| MBTD1      | -0.0329093 | 0.0704362 |
| AL049840.4 | -0.0042231 | 0.0705116 |
| RNF214     | 0.0292929  | 0.0706838 |
| ULK3       | -0.003232  | 0.0708323 |
| MMUT       | 0.0064317  | 0.0708696 |
| TTN-AS1    | -0.0760134 | 0.0708727 |
| ABCD4      | -0.0227975 | 0.0708807 |
| DOCK11     | -0.0679216 | 0.0709101 |
| MAT2A      | -0.0379386 | 0.0710663 |
| TUBGCP4    | -0.012664  | 0.0710713 |
| PDS5B      | -0.0909919 | 0.0711846 |
| TCF7       | -0.0196226 | 0.0712809 |
| SCAMP2     | 0.0484949  | 0.0715923 |
| AC008957.1 | 0.0005679  | 0.0718256 |
| RPAP2      | -0.1488048 | 0.0719443 |
| CD84       | -0.1129415 | 0.072167  |
| PRTN3      | -0.1585505 | 0.072273  |
| CHD1       | 0.0406335  | 0.0722794 |
| ICE2       | -0.0248307 | 0.0725914 |
| MAPK12     | -0.0196228 | 0.0727228 |
| SLC25A26   | 0.0144811  | 0.0731884 |
| TAF6L      | -0.0117129 | 0.0732918 |
| KCTD11     | -0.0252042 | 0.0733998 |
| SFXN5      | -0.0235086 | 0.0735437 |
| TMEM62     | -0.0245648 | 0.0736249 |
| MTF1       | -0.0083618 | 0.0738941 |
| CLIP1      | -0.0596871 | 0.0740634 |
| AC104825.1 | -0.0052435 | 0.0740708 |
| NDRG3      | 0.0022403  | 0.0740862 |
| WASHC3     | 0.0732963  | 0.0741892 |

|            |            |           |
|------------|------------|-----------|
| PES1       | 0.0115496  | 0.0742282 |
| TIGD1      | -0.0115396 | 0.0742372 |
| BRWD3      | -0.0185976 | 0.0743512 |
| ZNF574     | -0.0129588 | 0.0743855 |
| ARSB       | -0.0547699 | 0.0743942 |
| KIAA1586   | -0.0381894 | 0.0744658 |
| MON2       | -0.0866883 | 0.0745995 |
| ZNF394     | 0.0463379  | 0.0747098 |
| IFI27L2    | 0.0587593  | 0.0751211 |
| EIF4EBP3   | 0.0996385  | 0.0751442 |
| MHENCN     | 0.0091779  | 0.075359  |
| PDSS2      | -0.0194755 | 0.0753607 |
| EGLN1      | -0.0051294 | 0.0755198 |
| IAH1       | -0.0109488 | 0.0760402 |
| TMEM106B   | -0.0205139 | 0.0760535 |
| AAGAB      | -0.0294729 | 0.0761176 |
| SRXN1      | -0.009772  | 0.0761565 |
| RBM33      | -0.0200267 | 0.0762585 |
| IRF1       | -0.0799971 | 0.0763045 |
| DNAL4      | 0.024195   | 0.0765206 |
| SERGEF     | 0.0056387  | 0.0767302 |
| ADO        | -0.0022282 | 0.0767988 |
| PCGF1      | -0.0068231 | 0.0771074 |
| ZNF264     | -0.0110759 | 0.0771413 |
| ATAD5      | 0.0473215  | 0.0771868 |
| UNK        | -0.0395169 | 0.0772338 |
| GON7       | -0.0216144 | 0.07734   |
| SLC45A4    | -0.0186506 | 0.0774653 |
| AL354740.1 | -0.0344664 | 0.0774986 |
| SERPINA1   | -0.0489306 | 0.0775371 |
| DHRS4-AS1  | 0.0112284  | 0.077589  |
| STARD3     | 0.0061062  | 0.0776468 |
| AL590764.1 | 0.0266898  | 0.0777981 |
| NME6       | -0.0047423 | 0.0778798 |
| SPPL3      | -0.0350848 | 0.0779322 |
| TSPAN5     | 0.0509167  | 0.0779823 |
| PAG1       | 0.0679718  | 0.0781463 |
| NCOA7      | 0.0964018  | 0.0782005 |
| SLC1A5     | 0.0558658  | 0.0782007 |
| AP3B1      | -0.018406  | 0.0783822 |
| PSMG3      | 0.0095713  | 0.0784733 |
| ZSCAN2     | -0.037567  | 0.0785645 |
| CTDP1      | 0.0105386  | 0.078621  |
| CHKA       | -0.0117278 | 0.0787998 |
| UBC        | 0.2218114  | 0.0790229 |
| AC004034.1 | 0.015122   | 0.079195  |
| KLHL9      | -0.0028021 | 0.0793124 |
| ZNF577     | -0.027229  | 0.0796612 |
| PPP2R3C    | -0.024628  | 0.0797924 |
| YBX1       | 0.2369885  | 0.0797938 |

|            |            |           |
|------------|------------|-----------|
| SH3YL1     | -0.0042481 | 0.0798798 |
| SLC39A6    | -0.0037881 | 0.0798892 |
| DNAJB14    | -0.0431971 | 0.0799912 |
| FAM204A    | -0.0546906 | 0.0801901 |
| YES1       | 0.0382529  | 0.0802502 |
| ZDHHC12    | 0.0532302  | 0.0803818 |
| CDC23      | 0.0225677  | 0.080575  |
| NOL11      | 0.0053677  | 0.0806759 |
| BORCS7     | 0.0553871  | 0.0806848 |
| SCYL3      | -0.0351175 | 0.0808493 |
| AC246817.1 | -0.0389343 | 0.0809665 |
| GEN1       | -0.0476237 | 0.0810442 |
| AC008035.1 | -0.0077408 | 0.0810493 |
| FLYWCH1    | -0.020961  | 0.0810619 |
| ARSD       | -0.1571463 | 0.0814634 |
| CTSO       | -0.0340401 | 0.0815459 |
| ZNF564     | -0.0385192 | 0.0816245 |
| RHEX       | -0.2570127 | 0.081742  |
| CTBP1-DT   | -0.0307453 | 0.0818267 |
| ARID5B     | -0.0607673 | 0.0818305 |
| ZBTB22     | -0.0013297 | 0.0819288 |
| PTPN23     | -0.0026745 | 0.0823113 |
| IGHMBP2    | 0.015234   | 0.0823412 |
| ACP6       | -0.0048928 | 0.0823878 |
| WWP2       | -0.0261422 | 0.082404  |
| ZNF827     | 0.0041628  | 0.082442  |
| ENDOV      | -0.0006667 | 0.0824502 |
| TCTN1      | 0.0063264  | 0.0827261 |
| MICOS13    | 0.1186226  | 0.0828913 |
| DNTTIP1    | 0.0573573  | 0.0829402 |
| BCL3       | -0.020867  | 0.0832582 |
| AGPAT1     | -0.01021   | 0.0832959 |
| CCDC174    | -0.0373545 | 0.0832967 |
| LINC01122  | 0.0002377  | 0.083349  |
| AC092279.1 | -0.03255   | 0.0836248 |
| ZNF740     | 0.002707   | 0.0838412 |
| SNHG17     | -0.0102565 | 0.0839215 |
| METTL6     | -0.0050722 | 0.0840539 |
| NDUFAF4    | -0.0165963 | 0.0841206 |
| EI24       | 0.0126174  | 0.0841605 |
| TRPV2      | 0.0675799  | 0.0844291 |
| MPZL1      | -0.0228444 | 0.0845018 |
| LINC00863  | -0.0417329 | 0.0848495 |
| LINC01637  | 0.015126   | 0.085369  |
| STX3       | 0.0551169  | 0.0854737 |
| PDP2       | -0.0140248 | 0.0855837 |
| IL16       | 0.0539897  | 0.0859552 |
| MTA1       | -0.0163092 | 0.0860486 |
| ATG4C      | 0.0138661  | 0.0867556 |
| AC139530.1 | -0.0070591 | 0.0869487 |

|             |            |           |
|-------------|------------|-----------|
| LRRC8D      | -0.0188081 | 0.0873994 |
| RNF139      | 0.0026658  | 0.0876653 |
| UBR4        | -0.0212018 | 0.0877071 |
| UBE2J1      | 0.0818491  | 0.0877536 |
| N4BP2L2-IT1 | -0.0284571 | 0.0877586 |
| CXorf21     | -0.0392569 | 0.087965  |
| LEPROTL1    | 0.0329758  | 0.0880392 |
| ACTR3C      | -0.0236606 | 0.0882284 |
| AP1S1       | 0.0680283  | 0.0883273 |
| SERAC1      | -0.0398515 | 0.0884215 |
| CYP7B1      | 0.0574821  | 0.0884744 |
| EEA1        | -0.0165094 | 0.0885618 |
| SRSF4       | 0.0346665  | 0.0885628 |
| FBXL19      | -0.0131361 | 0.0886744 |
| AP4S1       | 0.0391467  | 0.0887642 |
| EHD4        | 0.046745   | 0.0887647 |
| ZNF605      | -0.0572737 | 0.0889111 |
| GATC        | -0.041236  | 0.0889775 |
| KHDRBS1     | 0.0339681  | 0.0889853 |
| DDX55       | -0.0491116 | 0.0891991 |
| CYFIP1      | 0.0228069  | 0.0895127 |
| C5orf63     | -0.015183  | 0.0895812 |
| ENOSF1      | 0.0490436  | 0.089741  |
| SLC38A6     | -0.0221684 | 0.0900766 |
| SUGT1       | 0.0403517  | 0.0901464 |
| ZNF790      | -0.0052393 | 0.090274  |
| RIC1        | -0.0559198 | 0.090451  |
| TASP1       | 0.0037743  | 0.0904988 |
| ELOF1       | 0.0057422  | 0.0905003 |
| CLASRP      | 0.0036646  | 0.0905302 |
| SLC26A1     | -0.0541098 | 0.0906924 |
| GGCT        | 0.0512043  | 0.090834  |
| SIRT5       | -0.0210022 | 0.0908791 |
| CTNNA1      | -0.0435084 | 0.0909202 |
| FBXO32      | -0.038389  | 0.0910402 |
| GCSH        | 0.0297741  | 0.0910957 |
| SLCO4A1     | -0.0483427 | 0.0915581 |
| TRAF7       | -0.0227688 | 0.0917583 |
| NDUFS2      | 0.0182002  | 0.0919626 |
| DNAJA3      | -0.0044841 | 0.0919669 |
| ZNF586      | -0.0423461 | 0.0920598 |
| SGF29       | -0.0215195 | 0.092068  |
| TMEM186     | 0.0354674  | 0.0921245 |
| AC012306.2  | -0.0236737 | 0.0921322 |
| GRPEL1      | -0.0381877 | 0.0923646 |
| GPI         | -0.056552  | 0.0925247 |
| FH          | 0.0144944  | 0.0925728 |
| PCCB        | 0.0070197  | 0.0931953 |
| SNRNP70     | 0.0168985  | 0.0936091 |
| AZIN1-AS1   | -0.0077646 | 0.0936164 |

|            |            |           |
|------------|------------|-----------|
| GGPS1      | -0.0260998 | 0.0938166 |
| PSMD10     | -0.0022095 | 0.0944682 |
| MRE11      | -0.0100698 | 0.0947014 |
| TRIM71     | 0.0722408  | 0.0947155 |
| AKT1S1     | 0.0176512  | 0.0951938 |
| TMCO3      | -0.0538077 | 0.0954655 |
| NAF1       | -0.0420865 | 0.0954702 |
| ADGRG3     | 0.0477152  | 0.0954922 |
| TEFM       | -0.0282157 | 0.0956726 |
| MAP3K2-DT  | -0.031434  | 0.0957447 |
| ADAR       | -0.0663769 | 0.0958339 |
| LGALS9     | -0.1151992 | 0.0958461 |
| EXD3       | 0.0249642  | 0.0959772 |
| MRM3       | 0.0208152  | 0.0961568 |
| CEP170     | 0.0104249  | 0.0965839 |
| SLC35B3    | -0.0450903 | 0.0971349 |
| INTS3      | 0.0058631  | 0.0973058 |
| MALRD1     | -0.0013325 | 0.0976837 |
| TMEM220    | 0.0175248  | 0.0979566 |
| COL9A2     | -0.0227413 | 0.0984708 |
| UBXN11     | 0.0329594  | 0.098789  |
| IFNGR1     | 0.0339467  | 0.0988619 |
| MRPS30     | 0.0030226  | 0.0988989 |
| C12orf4    | -0.0236468 | 0.0991054 |
| AC104041.1 | 0.0202161  | 0.0991621 |
| PPP1R37    | -0.0217173 | 0.0996034 |
| RBBP9      | -0.0107719 | 0.0997981 |
| TADA1      | -0.0133099 | 0.0999216 |
| MRPL45     | -0.0231113 | 0.1000538 |
| LPIN2      | -0.0738912 | 0.1003662 |
| TKFC       | 0.0133569  | 0.1004078 |
| KLF16      | -0.0209248 | 0.1004575 |
| PBX2       | -0.0351373 | 0.1005214 |
| DAXX       | 0.0360831  | 0.1007942 |
| SLC39A13   | -0.007463  | 0.1011469 |
| FECH       | 0.0190232  | 0.1012606 |
| NUDT15     | 0.0082141  | 0.1014545 |
| ZNF185     | 0.0844969  | 0.1015094 |
| ZNF598     | 0.015161   | 0.1022121 |
| MAP1LC3B   | -0.0333469 | 0.1022746 |
| CEP135     | 0.0256423  | 0.1023116 |
| SIRT6      | 0.0049688  | 0.1027512 |
| LINC01184  | 0.0310002  | 0.1030294 |
| AC012358.3 | -0.028845  | 0.1034785 |
| DHRS4L2    | -0.0045583 | 0.1035174 |
| UNC93B1    | 0.1093223  | 0.103727  |
| FEM1A      | -0.0237223 | 0.1039219 |
| NSUN4      | -0.0020096 | 0.1042293 |
| STAT3      | 0.0378029  | 0.1043628 |
| GATA2-AS1  | 0.0446723  | 0.1044386 |

|            |            |           |
|------------|------------|-----------|
| MPZ        | -0.0387892 | 0.1045753 |
| TTC28-AS1  | -0.0414692 | 0.1048384 |
| ERVK13-1   | -0.0195742 | 0.1048553 |
| MANEA-DT   | 0.0047885  | 0.1049375 |
| HNRNPAB    | 0.1489196  | 0.1053942 |
| AL135791.1 | -0.0055826 | 0.1054498 |
| MYLK-AS1   | 0.0117987  | 0.1054837 |
| UBR7       | -0.0036926 | 0.1056842 |
| PIGU       | 0.0039534  | 0.1059418 |
| CD34       | 0.1165508  | 0.1059605 |
| MED11      | 0.026477   | 0.1063805 |
| TXNRD2     | 0.004285   | 0.1064263 |
| FBRSL1     | -0.0196276 | 0.1071161 |
| AC040977.1 | -0.0164588 | 0.1071889 |
| TRIM38     | -0.0713702 | 0.107197  |
| ANKRD42    | -0.0160658 | 0.107587  |
| GUCD1      | -0.0730321 | 0.1077914 |
| SSBP2      | 0.069207   | 0.1077916 |
| MAP3K4     | -0.0081169 | 0.1079042 |
| ERICH1     | 0.0431516  | 0.1080693 |
| USP16      | 0.0225174  | 0.1082969 |
| DAD1       | 0.0814407  | 0.1087217 |
| KCTD13     | -0.0395966 | 0.1087807 |
| MTPN       | 0.145491   | 0.1088689 |
| PLEKHA2    | -0.0727877 | 0.1094552 |
| BICRAL     | -0.0142159 | 0.1096497 |
| DHDDS      | -0.0070821 | 0.1097041 |
| CIC        | 0.0187185  | 0.1098487 |
| ZNF606     | -0.0204666 | 0.1105648 |
| FANCG      | 0.0160512  | 0.1105655 |
| NEDD1      | -0.0179402 | 0.1106355 |
| GGNBP2     | -0.0074768 | 0.1106661 |
| PWWP2B     | 0.0203327  | 0.1110712 |
| AL355488.1 | -0.0265942 | 0.1110986 |
| GTF3C4     | -0.0103004 | 0.1112673 |
| ZNF816     | -0.0049098 | 0.111321  |
| RAE1       | 0.0099674  | 0.111384  |
| LIAS       | -0.0046884 | 0.1114513 |
| BTBD8      | 0.0041738  | 0.11156   |
| SIGLEC6    | -0.0645656 | 0.1116542 |
| PPID       | 0.0383126  | 0.1117057 |
| RAB20      | 0.0489342  | 0.111969  |
| GCHFR      | 0.1048757  | 0.1121288 |
| TMEM168    | -0.0296852 | 0.1126935 |
| ZNF644     | -0.0197902 | 0.1129401 |
| COPE       | 0.1309874  | 0.112968  |
| MED29      | 0.020722   | 0.1130048 |
| AC090825.1 | -0.025015  | 0.1132802 |
| MEN1       | -0.0030621 | 0.1137587 |
| HOTAIRM1   | -0.1344475 | 0.1139328 |

|            |            |           |
|------------|------------|-----------|
| KIF27      | -0.0523019 | 0.1141121 |
| ZNF133     | -0.0008266 | 0.1142443 |
| BBX        | 0.1203444  | 0.1143651 |
| KRT10      | 0.0311963  | 0.1143873 |
| AL080317.2 | -0.0450452 | 0.1143908 |
| TBPL1      | 0.0430014  | 0.1145736 |
| SAP30L-AS1 | -0.0215288 | 0.1151334 |
| AC090114.2 | -0.0136508 | 0.1156311 |
| Z93241.1   | 0.0605113  | 0.1159176 |
| TBL1XR1    | -0.0051603 | 0.1159767 |
| BCS1L      | 0.0117886  | 0.1162008 |
| FAM193A    | 0.0074128  | 0.116209  |
| THAP3      | 0.0207729  | 0.1164855 |
| HNRNPL     | -0.1212201 | 0.1164977 |
| TFB1M      | 0.0065322  | 0.1165604 |
| ZNF230     | -0.0257507 | 0.1175591 |
| MT2A       | 0.1223837  | 0.1175986 |
| AGTPBP1    | -0.0239867 | 0.1179947 |
| SLC38A5    | 0.0265626  | 0.1180701 |
| IFNAR2     | 0.0245953  | 0.1185523 |
| CCDC51     | 0.0550961  | 0.1185643 |
| RPS6KA3    | -0.1113149 | 0.118994  |
| ZNF573     | -0.0040147 | 0.1195528 |
| HPS4       | -0.0097254 | 0.1196098 |
| PDS5A      | -0.0469483 | 0.1196491 |
| TMEM44-AS  | 0.046749   | 0.1197732 |
| TGFB1      | 0.0999329  | 0.1198286 |
| L3MBTL1    | -0.0129325 | 0.1201721 |
| TMED1      | 0.0219695  | 0.1203446 |
| GOPC       | 0.0871296  | 0.1206871 |
| VPS13C     | -0.1412858 | 0.1208638 |
| BICD1      | 0.053091   | 0.1210055 |
| B4GALT3    | -0.0163    | 0.1216601 |
| XPA        | 0.0163042  | 0.1217448 |
| HACL1      | -0.0226727 | 0.1219446 |
| KRT18      | 0.0879118  | 0.1219768 |
| PRPF38B    | -0.077375  | 0.1220529 |
| RAB22A     | 0.0229174  | 0.1221569 |
| ZSCAN32    | -0.0061904 | 0.1222852 |
| TRMT10B    | -0.0231226 | 0.1223748 |
| DEPDC5     | -0.0286359 | 0.1224423 |
| TFAM       | 0.0906606  | 0.122463  |
| ZMYM5      | 0.0156953  | 0.1224802 |
| SH3BP5-AS1 | -0.0159472 | 0.1226398 |
| TMEM223    | 0.0780642  | 0.1227023 |
| SUPT6H     | 0.028052   | 0.1230067 |
| TRNAU1AP   | 0.0371724  | 0.1231549 |
| DLGAP4     | 0.0358641  | 0.123243  |
| REXO1      | -0.0007721 | 0.1232928 |
| ZNF266     | -0.0340198 | 0.1236134 |

|            |            |           |
|------------|------------|-----------|
| USP37      | 0.030041   | 0.1238287 |
| RDH13      | 0.0081445  | 0.1243769 |
| MMP19      | -0.0237415 | 0.1246678 |
| AC008982.2 | -0.0180222 | 0.1247448 |
| SLC9A7     | 0.027471   | 0.1248841 |
| MUL1       | -0.0082295 | 0.1251054 |
| TP53BP1    | -0.0034961 | 0.1253727 |
| KATNBL1    | -0.0442514 | 0.1254539 |
| NCKAP5L    | -0.00791   | 0.1257324 |
| FO393401.1 | 0.0444112  | 0.1260025 |
| ZNF347     | -0.0132102 | 0.1262511 |
| ZCCHC2     | -0.0413834 | 0.1262908 |
| PLEKHA5    | -0.026373  | 0.1263217 |
| FAM241A    | 0.0632459  | 0.1265137 |
| IL2RG      | 0.1119042  | 0.1267176 |
| TSEN54     | 0.0440394  | 0.1268061 |
| PDE6B      | -0.0009386 | 0.1268142 |
| C6orf136   | 0.0002389  | 0.1270031 |
| FAAP100    | 0.0074945  | 0.1271611 |
| YAE1       | -0.0003314 | 0.1272534 |
| GPD2       | -0.02726   | 0.1274178 |
| MLEC       | -0.0036445 | 0.127424  |
| SNAPC2     | 0.0015319  | 0.12761   |
| UBR5       | -0.0523497 | 0.1278864 |
| GTF2H1     | 0.002854   | 0.1281283 |
| ZSWIM6     | 0.0228904  | 0.1281811 |
| NAA10      | 0.0552968  | 0.1282712 |
| TMEM156    | -0.0264022 | 0.1284265 |
| HYOU1      | -0.0049827 | 0.1288749 |
| RTTN       | -0.0286669 | 0.1289883 |
| ANKRD13C   | 0.0207242  | 0.1290384 |
| HYAL2      | 0.0448119  | 0.1290478 |
| RBM45      | -0.0238632 | 0.1293534 |
| AC008074.2 | 0.0091157  | 0.1295223 |
| KLF7       | -0.0194169 | 0.1295754 |
| SUZ12      | -0.0094595 | 0.1297514 |
| KCTD20     | -0.0422008 | 0.1299881 |
| ARID1A     | -0.0181275 | 0.13045   |
| AC067852.2 | 0.0050307  | 0.1308266 |
| AC015871.7 | -0.0314961 | 0.1308916 |
| SNIP1      | -0.024581  | 0.1310419 |
| C11orf1    | -0.0604262 | 0.1316997 |
| MEAF6      | 0.036204   | 0.131835  |
| PPTC7      | -0.0024603 | 0.1319521 |
| PRADC1     | 0.0013589  | 0.1319588 |
| ERI2       | -0.0283216 | 0.1323916 |
| INO80C     | -0.0107865 | 0.1329788 |
| TLNRD1     | 0.0045514  | 0.1331451 |
| PHLPP1     | -0.0007623 | 0.1331662 |
| IWS1       | -0.0174648 | 0.1333385 |



|            |            |           |
|------------|------------|-----------|
| SIMC1      | -0.0195757 | 0.1333559 |
| DYRK1A     | -0.0346127 | 0.1333785 |
| NKRF       | 0.0200251  | 0.1342856 |
| FSD1L      | -0.0043376 | 0.1346238 |
| COQ2       | 0.0201123  | 0.1348047 |
| IKBKG      | -0.0017215 | 0.1352415 |
| LRR1       | -0.0072657 | 0.1354965 |
| ZNF234     | 0.0229874  | 0.1355215 |
| CELF1      | 0.0145831  | 0.135762  |
| SLC41A3    | -0.0192824 | 0.1359676 |
| CSTB       | -0.0172997 | 0.1361753 |
| DLEU2      | -0.0696519 | 0.1365844 |
| ZNF93      | -0.071575  | 0.1366944 |
| RAD18      | -0.0413037 | 0.1368258 |
| IGF2BP2    | 0.0493593  | 0.137746  |
| AL080276.2 | -0.0329968 | 0.1378219 |
| SYNJ2BP    | -0.0442847 | 0.137862  |
| ZC3H13     | -0.0746873 | 0.1379441 |
| GPALPP1    | -0.0084422 | 0.1386281 |
| IL17RC     | 0.0390884  | 0.1388745 |
| LATS2      | 0.0748642  | 0.13907   |
| RBM27      | 0.0699692  | 0.1392289 |
| GATAD2A    | -0.0095534 | 0.1401754 |
| ZNF789     | -0.0298754 | 0.1402694 |
| SPRYD7     | -0.0301712 | 0.1411898 |
| SORD       | 0.0546672  | 0.1413981 |
| BSCL2      | -0.0189047 | 0.1416461 |
| PPP2R5E    | -0.0496029 | 0.1419072 |
| PDCD2      | 0.0161363  | 0.1421382 |
| NMNAT1     | -0.002954  | 0.1421641 |
| NPAT       | -0.0096505 | 0.1422009 |
| MEGF6      | 0.0082473  | 0.1422891 |
| SNX30      | -0.0522793 | 0.1424243 |
| DDX50      | -0.0391397 | 0.1426065 |
| MKLN1      | -0.0800032 | 0.1426837 |
| BRF1       | -0.0306558 | 0.1429935 |
| NIT2       | 0.0393765  | 0.1431428 |
| IL27RA     | 0.032654   | 0.1435427 |
| ASB3       | 0.00433    | 0.1437789 |
| DYRK3      | 0.0879609  | 0.1438252 |
| RPL26L1    | -0.0073127 | 0.1441856 |
| PROCA1     | 0.0021418  | 0.1443166 |
| NRIP1      | 0.1388723  | 0.1445655 |
| RHBDD1     | -0.0120832 | 0.1450877 |
| FMO5       | 0.0206208  | 0.1456942 |
| PTDSS2     | 0.0199118  | 0.1460527 |
| ALG9       | -0.0026717 | 0.1462203 |
| CCDC130    | 0.0526824  | 0.1462468 |
| CERK       | 0.002412   | 0.1465684 |
| RPL32      | -0.0734251 | 0.1467898 |

|            |            |           |
|------------|------------|-----------|
| NGLY1      | 0.0006165  | 0.1472575 |
| KANK1      | -0.031585  | 0.1474126 |
| CIB1       | -0.0910959 | 0.1474732 |
| FURIN      | -0.1146232 | 0.1478159 |
| NDST2      | -0.0224959 | 0.1479105 |
| POLR3H     | 0.037766   | 0.1480064 |
| AREG       | -0.0273745 | 0.1480332 |
| AC135507.1 | -0.0173012 | 0.1483876 |
| ARSK       | -0.020492  | 0.1485067 |
| XRCC5      | 0.1402323  | 0.1488692 |
| PLIN3      | 0.0081021  | 0.1490833 |
| BLOC1S1    | 0.0763383  | 0.1490958 |
| AC009061.2 | -0.0112651 | 0.1492166 |
| AP000766.1 | -0.0258049 | 0.149813  |
| CPSF6      | -0.1008081 | 0.1498883 |
| SLC35E1    | 0.0076743  | 0.150492  |
| NXPE3      | -0.072702  | 0.1507953 |
| WIPF2      | 0.0034235  | 0.1510204 |
| C10orf25   | -0.0134467 | 0.1513099 |
| NCEH1      | -0.020965  | 0.1513563 |
| OSBP       | -0.0013427 | 0.1515553 |
| WDR20      | -0.0189622 | 0.1522356 |
| RSKR       | -0.0014767 | 0.1523584 |
| IGFBP2     | 0.1791427  | 0.1525988 |
| CLCN3      | 0.0018392  | 0.1530828 |
| DUS4L      | 0.0136221  | 0.1533903 |
| AL354822.1 | -0.0368188 | 0.1534017 |
| PPP2R5C    | -0.0287552 | 0.1539725 |
| CGAS       | -0.1014202 | 0.1542904 |
| FAS        | 0.0314808  | 0.1547294 |
| PSMC6      | -0.0512298 | 0.1549131 |
| MPLKIP     | 0.0332911  | 0.1549563 |
| UBE2D2     | 0.1265991  | 0.1549885 |
| AC079922.2 | 0.010707   | 0.1550135 |
| WDR74      | 0.0357018  | 0.1557654 |
| EID2       | -0.0274089 | 0.156104  |
| DGLUCY     | -0.0245934 | 0.1562126 |
| TTC4       | -0.0317203 | 0.1562666 |
| FAM76A     | -0.0445598 | 0.1562854 |
| SPECC1     | -0.0265382 | 0.1564624 |
| CDK2AP1    | 0.0596     | 0.1566309 |
| MCMBP      | -0.0536702 | 0.1566776 |
| ZNF561-AS1 | -0.0286759 | 0.1567787 |
| PCIF1      | -0.0419006 | 0.1569181 |
| TAPBP      | -0.0879785 | 0.1569903 |
| AL390195.2 | -0.0270283 | 0.1573229 |
| MAST4      | 0.083598   | 0.1573241 |
| INTS6-AS1  | -0.0158269 | 0.157922  |
| AC048341.1 | -0.0372453 | 0.1581462 |
| CCDC30     | -0.0723581 | 0.1582429 |

|            |            |           |
|------------|------------|-----------|
| AL096803.2 | -0.0197554 | 0.1587955 |
| UBQLN2     | -0.0366398 | 0.1588262 |
| SLC12A2    | -0.094977  | 0.159054  |
| ERGIC2     | -0.0273636 | 0.1591917 |
| ISG20L2    | -0.0506281 | 0.1595199 |
| MDH1       | 0.0197252  | 0.1597554 |
| TBL2       | -0.0018224 | 0.1598541 |
| FRS2       | -0.0208322 | 0.1610045 |
| TNFRSF1A   | 0.0157883  | 0.1611323 |
| PLGRKT     | 0.0010132  | 0.1613609 |
| SIAH1      | -0.0274019 | 0.1614185 |
| NBPF10     | -0.0225327 | 0.1618103 |
| PMPCA      | 0.027143   | 0.1620452 |
| IKBIP      | -0.0211493 | 0.1620838 |
| MINCR      | -0.0663541 | 0.1622775 |
| MTHFS      | -0.046307  | 0.1624524 |
| ZNF267     | 0.0183302  | 0.1626142 |
| AC007406.5 | -0.0086996 | 0.1626352 |
| CXorf40A   | -0.0094846 | 0.1627155 |
| ZSCAN9     | 0.0186482  | 0.1630955 |
| TRIM24     | -0.0603435 | 0.1630967 |
| TEPSIN     | -0.0178044 | 0.163234  |
| CHCHD4     | -0.0210656 | 0.1634028 |
| GTPBP4     | 0.0714302  | 0.1640309 |
| CDKAL1     | 0.0011737  | 0.1649541 |
| HTATIP2    | -0.0003634 | 0.165376  |
| PRAF2      | 0.0138055  | 0.1660075 |
| NR2F6      | 0.041008   | 0.1660715 |
| CLN8       | 0.05993    | 0.1668257 |
| ZSWIM9     | -0.002833  | 0.1669688 |
| TRMT2A     | 0.0305292  | 0.1669844 |
| ZBTB34     | -0.0351326 | 0.167453  |
| NRM        | 0.0637508  | 0.1679102 |
| AC016747.1 | 0.0438234  | 0.1679434 |
| SLC5A3     | -0.014735  | 0.1680581 |
| SRA1       | -0.004838  | 0.1680708 |
| PRKACA     | -0.0111223 | 0.1681161 |
| CAST       | 0.1337396  | 0.1682552 |
| SNRNP35    | 0.0591471  | 0.1687557 |
| SLC66A1    | -0.0023691 | 0.1688216 |
| MED18      | 0.0404297  | 0.1689194 |
| MED23      | -0.0311837 | 0.1689872 |
| WRAP73     | 0.0061613  | 0.1690562 |
| DHX16      | 0.0207817  | 0.1696521 |
| JARID2     | -0.0926109 | 0.1698092 |
| RPS6       | 0.0951243  | 0.1699295 |
| NEMP2      | 0.0082776  | 0.1700599 |
| RAD51-AS1  | 0.0607017  | 0.1706949 |
| FADS3      | 0.0206021  | 0.1708615 |
| IL6ST      | 0.0673048  | 0.1710537 |

|                    |            |           |
|--------------------|------------|-----------|
| CCNY               | -0.0039966 | 0.1713036 |
| DYNC2LI1           | -0.0230551 | 0.1715435 |
| TOPORS             | 0.0347639  | 0.1719295 |
| NOC3L              | 0.0133148  | 0.1723318 |
| ARCN1              | 0.0365164  | 0.172495  |
| GIMAP6             | 0.0224087  | 0.1725172 |
| ANKFY1             | -0.0169949 | 0.1726414 |
| GAA                | -0.0062565 | 0.1732098 |
| TAF6               | 0.0191627  | 0.173282  |
| FANCI              | 0.042768   | 0.1736651 |
| ZNF28              | -0.0624573 | 0.1743011 |
| ACOT13             | 0.0331996  | 0.1743589 |
| MCTP2              | 0.0736993  | 0.1747654 |
| YIPF2              | 0.0321289  | 0.1749448 |
| CORO1B             | -0.0085158 | 0.1750336 |
| CALCOCO2           | 0.0398056  | 0.1761369 |
| VPS13D             | -0.0386487 | 0.1763831 |
| RPL4               | 0.1591388  | 0.1770049 |
| REEP3              | 0.0050915  | 0.1774399 |
| PISD               | 0.0289953  | 0.1776422 |
| RDH11              | -0.0317515 | 0.177793  |
| EPB41L4A- <i>A</i> | -0.0766749 | 0.1783624 |
| TENT5A             | -0.1330382 | 0.1785633 |
| FN3KRP             | -0.0261526 | 0.1792586 |
| TXNDC11            | -0.0236274 | 0.1794134 |
| SPNS2              | 0.0385271  | 0.179605  |
| BFAR               | 0.0266556  | 0.1798727 |
| AC008969.1         | -0.035785  | 0.1798777 |
| HOXB-AS3           | 0.0347412  | 0.1802115 |
| CDC73              | -0.0476962 | 0.1810177 |
| CLCC1              | 0.0466693  | 0.181176  |
| ZNF496             | 0.0029887  | 0.1816852 |
| THAP1              | 0.0306233  | 0.1816904 |
| CTNS               | -0.006351  | 0.1820434 |
| LNCAROD            | -0.1124624 | 0.1822732 |
| BNIP3L             | 0.0175715  | 0.1827791 |
| GTF3A              | 0.1587167  | 0.1828651 |
| AKR1C3             | 0.1335021  | 0.18362   |
| COMMD8             | -0.0383866 | 0.1836454 |
| CIITA              | 0.0493504  | 0.1838881 |
| FBXO6              | 0.0135434  | 0.1840219 |
| NUP50-DT           | -0.0081102 | 0.1842962 |
| ZFP3               | -0.001316  | 0.184492  |
| REEP4              | -0.0317083 | 0.1846363 |
| ADGRG6             | 0.102659   | 0.1853691 |
| NFRKB              | -0.0317335 | 0.1861039 |
| DTWD2              | -0.0422354 | 0.1866446 |
| PRKCI              | -0.0292834 | 0.1867567 |
| RBBP5              | -0.0414979 | 0.1869691 |
| NMRK1              | 0.0019938  | 0.18727   |

|            |            |           |
|------------|------------|-----------|
| VRK1       | -0.0039285 | 0.1876485 |
| KLF3       | 0.0594711  | 0.1877288 |
| TTC33      | -0.0145198 | 0.1884188 |
| FAM153CP   | -0.0156184 | 0.1886857 |
| INSIG2     | -0.0144092 | 0.1894806 |
| TCF15      | -0.0318101 | 0.1897438 |
| ZDHHC17    | -0.0344772 | 0.1905763 |
| DDX19A     | -0.0497221 | 0.1905955 |
| C12orf65   | 0.035663   | 0.1906006 |
| HMGCS1     | -0.1311789 | 0.1907563 |
| CENPBD1    | 0.0154725  | 0.1910629 |
| GMPPA      | -0.0034035 | 0.1913123 |
| BORCS6     | -0.0172431 | 0.1917906 |
| KIAA1328   | -0.0157771 | 0.1917976 |
| IRAK1BP1   | 0.0195745  | 0.1918782 |
| SNW1       | -0.0577358 | 0.1919706 |
| AC008124.1 | -0.0344503 | 0.1930564 |
| ANXA7      | -0.1250225 | 0.1937427 |
| SIRT1      | -0.0288743 | 0.1938268 |
| PRR13      | -0.1387833 | 0.1940296 |
| INTS1      | 0.0195295  | 0.1943374 |
| MRI1       | -0.0171215 | 0.1943689 |
| SELENON    | 0.0112516  | 0.1945939 |
| TMEM39B    | -0.0048417 | 0.1947554 |
| TMEM147-A  | -0.0227318 | 0.1948571 |
| LAMTOR4    | 0.1019095  | 0.1950349 |
| ZNF180     | 0.0066121  | 0.1953012 |
| BBS4       | -0.0129431 | 0.195582  |
| AKIP1      | 0.0460459  | 0.1959918 |
| KLHDC10    | -0.0240498 | 0.19601   |
| RFX3       | -0.0173672 | 0.1962498 |
| GIGYF2     | 0.0252445  | 0.1963002 |
| UBE4A      | -0.0423943 | 0.1965268 |
| LMBR1      | -0.0020312 | 0.1965959 |
| TBXAS1     | 0.0176218  | 0.1978712 |
| CASP7      | 0.0273166  | 0.198013  |
| RGP1       | 0.0382131  | 0.1991407 |
| AC107214.1 | 0.0092605  | 0.1991899 |
| RAB5IF     | -0.0111034 | 0.199635  |
| GGCX       | -0.0856669 | 0.2002862 |
| XPR1       | -0.0335056 | 0.2005032 |
| RPUSD3     | 0.0219633  | 0.200537  |
| THAP6      | -0.0092141 | 0.2005884 |
| TIMMDC1    | 0.0531698  | 0.2006195 |
| ACSF3      | 0.0538583  | 0.2011041 |
| EIF2S2     | -0.0190898 | 0.2013539 |
| FLVCR1     | -0.0359068 | 0.2015378 |
| RBM22      | 0.0015393  | 0.2016466 |
| RAP1A      | -0.0710024 | 0.2020881 |
| CPEB2      | -0.0416311 | 0.2026703 |

|            |            |           |
|------------|------------|-----------|
| ANKRD54    | 0.0443977  | 0.2028391 |
| RCL1       | -0.0023545 | 0.2028847 |
| GOLGA2     | 0.0337771  | 0.2029479 |
| YEATS2     | -0.014311  | 0.2031087 |
| FARSA      | -0.0679435 | 0.2031815 |
| SLC29A1    | -0.0465422 | 0.2031989 |
| COA6       | 0.03392    | 0.2034032 |
| HSDL2      | 0.0690881  | 0.2035075 |
| EDEM3      | -0.1208003 | 0.2038425 |
| ZNF674     | -0.0128955 | 0.2041505 |
| MLXIP      | -0.0216697 | 0.2054026 |
| SREK1IP1   | 0.0249404  | 0.2054031 |
| ANKRD13A   | 0.0098852  | 0.2056506 |
| MAST3      | -0.0505945 | 0.2061129 |
| ADAT2      | -0.0181267 | 0.2064165 |
| NOP56      | 0.1128382  | 0.2064997 |
| REL        | -0.0302651 | 0.206571  |
| CLPTM1L    | -0.0148278 | 0.2075818 |
| MRTFB      | -0.0222221 | 0.2075956 |
| PRNP       | -0.0045848 | 0.2076591 |
| FGFR1OP2   | 0.1006904  | 0.208033  |
| DDX31      | 0.010048   | 0.2082755 |
| SLC31A2    | 0.0032061  | 0.2094531 |
| SNX6       | 0.0833713  | 0.2097007 |
| MFAP3      | 0.0066765  | 0.209978  |
| UBALD2     | 0.0431642  | 0.2102056 |
| SPATA13    | 0.0360832  | 0.2107289 |
| AL157834.1 | 0.0075529  | 0.211319  |
| TMEM87A    | -0.0298263 | 0.2115338 |
| CRAMP1     | -0.0362751 | 0.2119086 |
| MBD6       | -0.0195746 | 0.2120483 |
| SUGP2      | -0.1041846 | 0.2128369 |
| G3BP1      | -0.0836048 | 0.2129652 |
| FES        | 0.027337   | 0.2133346 |
| TAS2R30    | -0.0232268 | 0.2135809 |
| AC010745.5 | -0.0389285 | 0.213953  |
| TSR2       | 0.0138621  | 0.2148657 |
| MED8       | 0.005067   | 0.215302  |
| SZT2       | -0.032662  | 0.2157534 |
| ASB13      | -0.0172765 | 0.2161716 |
| RUFY2      | -0.0242757 | 0.2162016 |
| NR1H3      | 0.0559353  | 0.2173611 |
| KCTD3      | -0.0129338 | 0.217566  |
| HECTD3     | -0.0056995 | 0.2177981 |
| RTCA-AS1   | -0.0316655 | 0.2178872 |
| AIFM1      | -0.0136024 | 0.2182386 |
| C1QTNF6    | -0.0352252 | 0.2182871 |
| ALG5       | 0.0460364  | 0.2184806 |
| ANP32E     | -0.0218216 | 0.2192157 |
| U2AF1L5    | -0.0233542 | 0.219577  |

|            |            |           |
|------------|------------|-----------|
| MOB1B      | 0.1116599  | 0.2201929 |
| MRPL1      | -0.0015556 | 0.2203964 |
| SHPRH      | 0.0047648  | 0.2216238 |
| PIP4K2A    | -0.0128554 | 0.2222035 |
| ITGB3BP    | -0.0030627 | 0.2236112 |
| MRM2       | 0.0804648  | 0.2239328 |
| NDUFS7     | 0.0272194  | 0.2240262 |
| ZNF555     | -0.0546305 | 0.2244234 |
| NDUFAF7    | -0.0385572 | 0.2248847 |
| AL391069.2 | -0.0885306 | 0.2250153 |
| ARHGEF18   | -0.0145472 | 0.2262623 |
| USP53      | 0.0066323  | 0.2264863 |
| POLR1A     | 0.0075613  | 0.2269256 |
| FXN        | -0.0363023 | 0.2276206 |
| KDM4A-AS1  | -0.032563  | 0.2279977 |
| TP53TG1    | 0.0493002  | 0.2280043 |
| IFT172     | -0.0181544 | 0.2280312 |
| AL009179.2 | -0.0379828 | 0.2280809 |
| AC002464.1 | -0.0171583 | 0.2282801 |
| EXOSC3     | 0.0515604  | 0.2284205 |
| NIPA1      | -0.0290203 | 0.2293857 |
| FRMD8      | -0.046285  | 0.2294301 |
| SMARCC2    | -0.0340724 | 0.2297558 |
| ZFYVE1     | -0.027191  | 0.2300517 |
| PLAAT4     | 0.0711743  | 0.2303036 |
| CDK12      | 0.0457147  | 0.2303428 |
| MAP4K2     | -1.327E-05 | 0.2314281 |
| MAPK14     | -0.0382611 | 0.2317533 |
| ZNHIT2     | 0.0275633  | 0.2318818 |
| UQCRHL     | -0.02273   | 0.2333409 |
| ARFGAP3    | 0.0771603  | 0.2334631 |
| COG1       | -0.0202503 | 0.2335239 |
| UBA3       | 0.0065636  | 0.2339278 |
| MTERF3     | -0.0170142 | 0.234048  |
| DUSP12     | -0.0201715 | 0.2340894 |
| ITPRIPL2   | -0.073449  | 0.2341136 |
| YIPF4      | -0.1685006 | 0.2341922 |
| AC006449.6 | -0.0160855 | 0.2351279 |
| IRF2BPL    | -0.04539   | 0.2353092 |
| NME8       | 0.006493   | 0.2356482 |
| TANGO2     | 0.019133   | 0.2365198 |
| MTMR1      | 0.0158813  | 0.2366747 |
| GLIDR      | -0.0074465 | 0.2370753 |
| AL117336.2 | -0.0345163 | 0.2378992 |
| U2AF1L4    | -0.0308489 | 0.2393303 |
| EMC10      | 0.0171153  | 0.24026   |
| HCG25      | -0.023519  | 0.2403943 |
| CCDC86     | -0.005702  | 0.2410866 |
| NUSAP1     | 0.035456   | 0.2419816 |
| HSH2D      | 0.0900786  | 0.2420042 |

|            |            |           |
|------------|------------|-----------|
| POLI       | -0.0176081 | 0.2435162 |
| DNAJA1     | 0.0401251  | 0.243987  |
| EBLN3P     | 0.0095832  | 0.2442936 |
| AHI1       | -0.0362795 | 0.2449058 |
| APIP       | 0.0067398  | 0.2452359 |
| AL590064.1 | -0.0120344 | 0.2453291 |
| RBMS2      | -0.0391838 | 0.2456058 |
| ZNF569     | -0.0307764 | 0.2463274 |
| MBNL2      | 0.0045271  | 0.247064  |
| ZNF420     | -0.0032273 | 0.2470958 |
| MED1       | -0.0143228 | 0.2476981 |
| TRIM46     | -0.0019159 | 0.2485082 |
| MARC2      | 0.0134833  | 0.2501078 |
| CORO7      | 0.0262929  | 0.2504776 |
| RAB12      | 0.0176352  | 0.250605  |
| SLC7A5     | -0.0586166 | 0.2510036 |
| ZNF618     | -0.0249683 | 0.2515598 |
| TRMT112    | 0.0946064  | 0.2521018 |
| HCG11      | -0.0540234 | 0.2522049 |
| PAF1       | 0.0236711  | 0.2534143 |
| ZNF428     | -0.0101596 | 0.2534239 |
| ZNF529-AS1 | -0.0135848 | 0.2551263 |
| RBMX2      | 0.0276164  | 0.2554918 |
| PYCR1      | 0.014194   | 0.2558365 |
| SFI1       | 0.0114542  | 0.2573082 |
| TMEM59     | 0.1160074  | 0.2579076 |
| ZNF253     | -0.0096127 | 0.2580662 |
| EDRF1      | -0.0129413 | 0.2583717 |
| MAPKBP1    | 0.0227834  | 0.2586275 |
| CCDC186    | -0.006897  | 0.2600328 |
| DARS       | 0.0353055  | 0.2601846 |
| DCAF15     | -0.0189003 | 0.260705  |
| RBM26-AS1  | -0.0313968 | 0.2610976 |
| PTGER2     | 0.0675973  | 0.2621413 |
| EYA3       | -0.006518  | 0.2623929 |
| AHCYL1     | 0.0053795  | 0.2625855 |
| RPP14      | -0.0208499 | 0.2628902 |
| THNSL1     | 0.0037995  | 0.263201  |
| STK16      | 0.0223546  | 0.2643371 |
| EIF2AK4    | 0.0213618  | 0.2644668 |
| CHSY1      | -0.0885262 | 0.2652831 |
| FGFR1OP    | -0.0202816 | 0.265642  |
| SNTB1      | -0.0403843 | 0.2657805 |
| FASTKD5    | -0.0284911 | 0.2658752 |
| RAB32      | -0.1713403 | 0.2662187 |
| SLX4IP     | 0.0647715  | 0.2667834 |
| KLHL23     | 0.1081044  | 0.2676953 |
| DCAKD      | -0.0157799 | 0.2678523 |
| TUBGCP3    | -0.0194355 | 0.2681254 |
| FCSK       | -0.0131635 | 0.2682418 |



|            |            |           |
|------------|------------|-----------|
| RPRD2      | 0.0077859  | 0.2683911 |
| PPP5C      | 0.0372695  | 0.2693936 |
| ARHGAP9    | -0.0169634 | 0.2694778 |
| LENG8-AS1  | 0.031199   | 0.2695507 |
| CCL23      | 0.0588533  | 0.2695703 |
| HDGFL2     | -0.0187997 | 0.2700756 |
| ARMH3      | 0.0099063  | 0.2706585 |
| MARS       | 0.0402662  | 0.2707108 |
| CYBRD1     | 0.0596792  | 0.2711635 |
| ZNF668     | -0.0094899 | 0.2711648 |
| FOXO4      | -0.0205858 | 0.2712013 |
| YPEL1      | -0.0036901 | 0.2722833 |
| RASGEF1A   | 0.0067769  | 0.2726479 |
| MPI        | 0.0410138  | 0.2726898 |
| KDM1B      | 0.0035939  | 0.2728437 |
| BBS1       | 0.0098236  | 0.2728437 |
| AC102953.2 | -0.0137903 | 0.272856  |
| RPLP1      | 0.0825103  | 0.2730926 |
| LBR        | -0.0114517 | 0.2735128 |
| BIN2       | 0.114145   | 0.2740532 |
| DDX60L     | -0.0020013 | 0.2745853 |
| SREK1      | -0.0594137 | 0.274941  |
| TWF2       | 0.0496279  | 0.2750315 |
| BEST1      | -0.0338322 | 0.2757995 |
| TCIRG1     | 0.0224497  | 0.2759687 |
| PITRM1     | 0.0100765  | 0.2760124 |
| PGPEP1     | 0.0120244  | 0.2760275 |
| FUBP1      | -0.1003602 | 0.2760597 |
| RCOR1      | -0.0769733 | 0.2765471 |
| DNAJC14    | -0.032536  | 0.2765917 |
| LINC02193  | -0.0232437 | 0.2767044 |
| ADHFE1     | -0.019027  | 0.2769187 |
| RAD54L2    | -0.0015215 | 0.2771131 |
| PDXP       | 0.0193843  | 0.277361  |
| NAPG       | 0.0146381  | 0.2780712 |
| ZNF501     | 0.0107727  | 0.2783093 |
| KDM4B      | -0.0110513 | 0.278713  |
| NAA35      | -0.0567995 | 0.2789845 |
| PARP12     | 0.0074116  | 0.2792952 |
| AC005726.5 | -0.021218  | 0.2800655 |
| ACOT9      | 0.0122335  | 0.2805657 |
| AP003486.1 | -0.0192003 | 0.2815102 |
| HOXB5      | -0.0454556 | 0.2828786 |
| ZNF518B    | -0.019565  | 0.2835905 |
| SLFN13     | -0.0290671 | 0.2838299 |
| AC096992.2 | -0.006845  | 0.2849714 |
| CNOT2      | -0.0588373 | 0.286234  |
| ALG1       | 0.0115956  | 0.2867466 |
| MPHOSPH8   | 0.0361677  | 0.2870088 |
| NPIP2      | -0.0381998 | 0.2879714 |

|            |            |           |
|------------|------------|-----------|
| ZCWPW1     | 0.0071896  | 0.2887549 |
| PDCD6IP    | -0.1207874 | 0.2888878 |
| EXOSC2     | -0.0097484 | 0.2893436 |
| ARHGAP30   | 0.1293225  | 0.2894318 |
| CAPN10-DT  | -0.0420739 | 0.2899224 |
| NCDN       | 0.0022825  | 0.2905369 |
| ARMCX1     | 0.0581961  | 0.2905865 |
| BET1       | -0.0104692 | 0.2906842 |
| MYO9A      | -0.0087536 | 0.2914617 |
| ICA1       | 0.0571859  | 0.2915137 |
| AC107464.3 | 0.0320474  | 0.2915771 |
| ZEB1       | 0.0609832  | 0.2916173 |
| AGTRAP     | 0.0095912  | 0.292079  |
| MAP7D1     | -0.0338197 | 0.2923724 |
| TFDP2      | 0.0954377  | 0.2935163 |
| TMCO4      | -0.0088203 | 0.2936358 |
| APOL2      | -0.032469  | 0.2937593 |
| BAZ2B      | -0.1415828 | 0.2943504 |
| CUL3       | -0.0004738 | 0.2962711 |
| GALC       | -0.012078  | 0.2964844 |
| TBL1X      | 0.0797384  | 0.2980596 |
| KLHL11     | 0.0083488  | 0.2985804 |
| CLDN15     | 0.0158102  | 0.2986138 |
| USP15      | 0.0613812  | 0.2987201 |
| UBL4A      | -0.0179127 | 0.2988351 |
| NCLN       | 0.0233876  | 0.2991574 |
| IL17RA     | -0.0464657 | 0.2991816 |
| SLC25A15   | -0.0352969 | 0.299618  |
| CDAN1      | -0.0052455 | 0.3001983 |
| SMAD1      | 0.0221404  | 0.3012218 |
| FAM199X    | -0.0449217 | 0.3012508 |
| SNX5       | 0.0019045  | 0.3021776 |
| MICU3      | 0.0331258  | 0.3026995 |
| PXN        | 0.008694   | 0.3027719 |
| ZNF764     | 0.0233868  | 0.3028463 |
| NKIRAS1    | 0.0523114  | 0.3029406 |
| RWDD3      | 0.022943   | 0.3029536 |
| PHF7       | -0.0138577 | 0.303996  |
| SPTAN1     | 0.0337082  | 0.3049231 |
| NPC2       | -0.1404356 | 0.3055327 |
| TTC31      | 0.0482862  | 0.3064302 |
| GMPR2      | 0.055683   | 0.3068611 |
| LYAR       | 0.1051732  | 0.3088518 |
| WDR5B      | -0.0008696 | 0.3089312 |
| KAT14      | -0.0073466 | 0.3090201 |
| PPM1L      | -0.0223003 | 0.3103942 |
| DNAJC12    | 0.0476077  | 0.3106153 |
| TMEM44     | 0.0098842  | 0.3116067 |
| CENPF      | 0.0719145  | 0.3116971 |
| GVQW3      | -0.0163995 | 0.3128061 |

|            |            |           |
|------------|------------|-----------|
| RBMS1      | 0.0085675  | 0.3131758 |
| AC078846.1 | -0.0276437 | 0.3135554 |
| TNNT3      | 0.0309281  | 0.3140032 |
| NUMA1      | -0.0456584 | 0.3140811 |
| MCRIP1     | -0.0371603 | 0.314217  |
| TM7SF3     | 0.0087444  | 0.3143397 |
| AL158152.1 | -0.0622644 | 0.3145023 |
| AP002360.1 | 0.0212713  | 0.3146914 |
| AC025171.1 | -0.018082  | 0.3151553 |
| SBNO1      | -0.0242059 | 0.3156813 |
| OAS2       | 0.0683639  | 0.3159399 |
| THEM4      | -0.0350269 | 0.3160868 |
| WDFY2      | 0.049959   | 0.3167004 |
| ARMC5      | -0.0203887 | 0.317237  |
| TXNDC12    | -0.0398904 | 0.3176215 |
| AGPAT4     | -0.0233129 | 0.3180366 |
| MVP        | 0.0063158  | 0.319421  |
| GNPDA1     | 0.1050443  | 0.3196682 |
| NONO       | -0.0154103 | 0.3198779 |
| CD109      | 0.1293135  | 0.3199988 |
| NXT2       | -0.0071448 | 0.3203954 |
| GSTM5      | 0.0302975  | 0.3217787 |
| HEBP2      | 0.1205841  | 0.3220045 |
| DNAJB9     | -0.001675  | 0.3227934 |
| TRANK1     | 0.0231123  | 0.3228906 |
| SPATA33    | 0.0184135  | 0.3234062 |
| ARHGAP15   | 0.0533928  | 0.3238695 |
| AC026124.1 | -0.0293531 | 0.323967  |
| TTC7B      | -0.0138265 | 0.3240234 |
| ISCA1      | 0.0400521  | 0.3243092 |
| CLN3       | -0.0224619 | 0.3266618 |
| TYW1       | -0.0345836 | 0.3276742 |
| CCDC12     | 0.0638657  | 0.3277643 |
| FTO        | -0.0200804 | 0.3277663 |
| AL080317.1 | -0.028194  | 0.3281299 |
| VCPIP1     | -0.004693  | 0.3290815 |
| SMAD2      | -0.1086068 | 0.3291111 |
| UBOX5      | -0.014072  | 0.3331206 |
| C1orf43    | -0.015323  | 0.3336496 |
| TIMM23B    | -0.0236223 | 0.3343168 |
| TTI1       | 0.0053725  | 0.3345348 |
| GPATCH2L   | -0.1131389 | 0.3347757 |
| CLPTM1     | 0.0240951  | 0.334992  |
| PPP1CB     | -0.1511245 | 0.3349941 |
| HIST1H2AD  | -0.0341946 | 0.3353919 |
| PPIG       | 0.0971861  | 0.335412  |
| WDR33      | -0.0602804 | 0.3358382 |
| ZSCAN30    | 0.0190888  | 0.3367349 |
| PPIF       | -0.1189958 | 0.3371788 |
| ZNF33A     | -0.1109288 | 0.3374255 |

|            |            |           |
|------------|------------|-----------|
| SEC24B-AS  | -0.0204475 | 0.3382599 |
| AP2M1      | 0.0424596  | 0.3385131 |
| AC016588.2 | -0.0271349 | 0.3386317 |
| KMT2D      | -0.0504945 | 0.3393778 |
| YWHAE      | -0.0912325 | 0.3394014 |
| AC010642.2 | 0.01446    | 0.3407364 |
| FAM118B    | -0.0005387 | 0.3410533 |
| STT3B      | 0.0091157  | 0.3415932 |
| RDX        | -0.0315342 | 0.3418051 |
| SNHG26     | -0.0461487 | 0.3430336 |
| SLC35A5    | -0.002993  | 0.3435474 |
| NAB2       | 0.013191   | 0.3447469 |
| ATOX1      | 0.0500442  | 0.3453232 |
| BRD2       | -0.0637983 | 0.3458251 |
| DCP2       | -0.0332444 | 0.346365  |
| ZNF611     | -0.0131659 | 0.3464177 |
| HOXB4      | -0.0103118 | 0.3464802 |
| ZFAND2B    | 0.0358627  | 0.3466187 |
| CSNK1G1    | 0.0184768  | 0.3472452 |
| SNRPG      | 0.0322114  | 0.3473039 |
| FADS1      | -0.0013851 | 0.3500782 |
| ALPK1      | -0.0060487 | 0.3524655 |
| UNC119B    | 0.0091441  | 0.3531624 |
| NBPF26     | -0.0239858 | 0.3531811 |
| AFF4       | -0.0407054 | 0.3534931 |
| MNDA       | -0.0318182 | 0.3539743 |
| TESPA1     | -0.1150091 | 0.3548168 |
| CAPRIN1    | -0.0347711 | 0.3549049 |
| PDE3B      | -0.0413625 | 0.3570955 |
| PTTG1      | 0.0358373  | 0.358313  |
| METTL18    | -0.0116992 | 0.3583531 |
| MESD       | 0.073929   | 0.3601823 |
| ARFGAP1    | -0.0040333 | 0.3612984 |
| BLOC1S4    | 0.0322374  | 0.3614267 |
| USP12      | -0.0606773 | 0.3619566 |
| METAP2     | -0.0714022 | 0.3625377 |
| GPATCH1    | -0.0064607 | 0.3645582 |
| DANCR      | -0.0828792 | 0.3651177 |
| KBTBD3     | 0.0050914  | 0.365875  |
| MBD5       | -0.0099749 | 0.3676475 |
| ARID4B     | -0.0814216 | 0.3686038 |
| TIMP2      | 0.0333436  | 0.368674  |
| HELQ       | 0.0056069  | 0.368928  |
| WIPI2      | 0.0321965  | 0.3696107 |
| AC083799.1 | 0.0080398  | 0.369914  |
| GRK3       | -0.0182771 | 0.3699958 |
| DIPK2A     | -0.0004738 | 0.3714563 |
| TPSB2      | -0.0380678 | 0.3715979 |
| AP002387.2 | -0.0189725 | 0.3721797 |
| ANKRD36C   | -0.097433  | 0.3732797 |

|            |            |           |
|------------|------------|-----------|
| PTER       | -0.0257888 | 0.3735235 |
| TBXA2R     | 0.0568009  | 0.3756608 |
| CTPS2      | -0.0016492 | 0.3759189 |
| IDH1       | 0.0317196  | 0.3779941 |
| AC097634.1 | -0.0284481 | 0.3782841 |
| FRAT1      | 0.0362297  | 0.3799084 |
| AC027020.2 | -0.0156686 | 0.3805987 |
| ZNF761     | -0.0232051 | 0.3819054 |
| LY86       | 0.0517807  | 0.382175  |
| GATAD1     | -0.0437401 | 0.3825526 |
| AQR        | -0.0395413 | 0.382807  |
| AASDHPPT   | -0.0136118 | 0.3832704 |
| LIMS1      | 0.025949   | 0.3840428 |
| SINHCAF    | -0.0063605 | 0.3849518 |
| ZNF775     | 0.005193   | 0.3851932 |
| RFC1       | 0.0729129  | 0.3864736 |
| SNX12      | 0.0008426  | 0.3867722 |
| CAPN7      | -0.0511148 | 0.3869213 |
| OXCT1      | 0.0441541  | 0.3871545 |
| PTGR2      | -0.0264554 | 0.3873328 |
| PKD2       | -0.0385462 | 0.3897739 |
| LGALS8     | -0.0224981 | 0.3899038 |
| SERTAD3    | 0.006928   | 0.3899647 |
| PPP1R2     | -0.0062883 | 0.3905401 |
| STARD9     | -0.0563886 | 0.3912132 |
| RAB27B     | 0.1919365  | 0.3939034 |
| NMNAT3     | -0.0008309 | 0.3939711 |
| EVI2A      | 0.1127965  | 0.3940304 |
| TMEM183A   | -0.0088576 | 0.3949234 |
| TTLL5      | -0.0276305 | 0.3961696 |
| AL121652.1 | -0.0251857 | 0.3964811 |
| OSBPL3     | 0.0689585  | 0.3965938 |
| CXXC1      | 0.000242   | 0.3981466 |
| PTPN7      | 0.0938321  | 0.3982239 |
| MX2        | 0.0307751  | 0.398914  |
| RPP30      | 0.0100864  | 0.4002993 |
| RHOBTB3    | 0.0983753  | 0.4004871 |
| MNT        | 0.0034761  | 0.4012367 |
| HEXD-IT1   | -0.0244195 | 0.4019373 |
| CDCA4      | 0.0249214  | 0.4024892 |
| MTFMT      | -0.0083744 | 0.4035859 |
| EMC1       | -0.0313395 | 0.404231  |
| DHX9       | -0.0131679 | 0.4057674 |
| AC242426.2 | -0.0014538 | 0.4058881 |
| ZEB1-AS1   | 0.0290002  | 0.4097124 |
| SMIM10     | 0.0631413  | 0.4101582 |
| FIG4       | -0.0100956 | 0.4102686 |
| ZNF430     | -0.061819  | 0.4111091 |
| AC005523.2 | -0.0010135 | 0.4136584 |
| SENP2      | -0.0374125 | 0.4138028 |

|            |            |           |
|------------|------------|-----------|
| CLNK       | 0.0727614  | 0.4141527 |
| PHF11      | -0.0673402 | 0.4141988 |
| TMEM14B    | 0.0305975  | 0.4157646 |
| CIAO3      | -0.0080779 | 0.4161849 |
| UBAP2      | -0.015595  | 0.4164095 |
| RSRC1      | 0.0286322  | 0.4183525 |
| NR1D2      | -0.0593406 | 0.4188064 |
| SNHG1      | 0.0282334  | 0.4191954 |
| RASSF7     | -0.0100896 | 0.4195025 |
| ZNF480     | 0.0078347  | 0.4224026 |
| TESMIN     | -0.0455466 | 0.4242057 |
| FAM122C    | 0.0083901  | 0.4247213 |
| WDPCP      | -0.0065123 | 0.4270541 |
| AC073896.3 | -0.0230833 | 0.4276934 |
| SMC6       | -0.0472289 | 0.4277    |
| CERS2      | -0.0506906 | 0.4282315 |
| CCAR1      | -0.0083375 | 0.428554  |
| ZCCHC7     | -0.0306745 | 0.4325558 |
| PPOX       | 0.0128903  | 0.4329732 |
| PARP4      | -0.0562795 | 0.4335879 |
| CLEC11A    | 0.0792237  | 0.4338483 |
| QTRT2      | -0.0321717 | 0.4343077 |
| SLC43A1    | 0.0120557  | 0.4344228 |
| NCK1       | -0.0044792 | 0.4354843 |
| NOTCH2NL   | -0.0514886 | 0.4357205 |
| DNAJC16    | -0.0156473 | 0.4360134 |
| DMAC2L     | -0.0521198 | 0.4375034 |
| RABEPK     | 0.0210885  | 0.4382106 |
| MAGEF1     | 0.0477017  | 0.438325  |
| NOP9       | -0.0031023 | 0.4391301 |
| LITAF      | -0.049604  | 0.4401847 |
| LSM14A     | -0.0364824 | 0.4402879 |
| ZMAT2      | -0.0110629 | 0.4423463 |
| SHISA5     | 0.0110882  | 0.4450463 |
| UGGT2      | -0.0195283 | 0.4463097 |
| CDK5RAP2   | 0.0028386  | 0.4490446 |
| ACTN1      | -0.124295  | 0.4518972 |
| SART3      | -0.0073915 | 0.4520995 |
| CASP8      | 0.04834    | 0.4531358 |
| SYPL1      | -0.0812656 | 0.4534407 |
| FBXL17     | -0.005278  | 0.454233  |
| KIAA0319L  | -0.0151393 | 0.4543519 |
| CBX5       | 0.0295712  | 0.4551203 |
| LIMD1      | 0.0066357  | 0.455524  |
| ZNF692     | 0.0020319  | 0.4563601 |
| SLC4A1AP   | 0.0021174  | 0.4564431 |
| CFAP97     | 0.1286906  | 0.4575464 |
| CRIP1      | 0.1611963  | 0.4577743 |
| NBPF11     | -0.0254441 | 0.4586315 |
| SLC3A2     | -0.0029029 | 0.4586582 |

|            |            |           |
|------------|------------|-----------|
| BIVM       | -0.0203162 | 0.4594252 |
| MTRF1L     | -0.0457364 | 0.4595964 |
| RSAD2      | -0.0036999 | 0.4608794 |
| ELP2       | -0.0198377 | 0.4615647 |
| GPSM3      | 0.0682858  | 0.4622158 |
| CCDC88A    | -0.1265261 | 0.4638748 |
| RASSF3     | -0.0542273 | 0.4643973 |
| EFCAB7     | -0.0209942 | 0.4661937 |
| CLCN6      | -0.0163636 | 0.4675217 |
| ZNF581     | 0.0400907  | 0.4682107 |
| LINC00683  | -0.0273409 | 0.4700868 |
| ZP3        | 0.0056427  | 0.4705549 |
| NOTCH2NL   | -0.0404355 | 0.4708804 |
| WASF2      | 0.134345   | 0.4720681 |
| TRAFD1     | -0.0055672 | 0.4721279 |
| GAS7       | -0.0242356 | 0.4757528 |
| TMEM267    | -0.0416176 | 0.4757886 |
| LINC00339  | 0.0231463  | 0.4764548 |
| TMEM191B   | -0.0216585 | 0.4768226 |
| RCE1       | -0.0174294 | 0.4794637 |
| STX11      | -0.0343251 | 0.4796069 |
| DPY19L1    | -0.0449073 | 0.4801092 |
| N6AMT1     | -0.0374068 | 0.4811797 |
| MOGS       | -0.0061869 | 0.481817  |
| LRIF1      | -0.0202007 | 0.4836484 |
| SCAMP1     | -0.0511115 | 0.4845506 |
| STK40      | -0.0186148 | 0.4845537 |
| UCN        | 0.0028649  | 0.4855318 |
| FANCL      | -0.0153532 | 0.4872536 |
| WDR55      | -0.0063643 | 0.489449  |
| INTS5      | -0.0061425 | 0.4897279 |
| SULT1A3    | -0.0478586 | 0.4897631 |
| DPP8       | -0.0660508 | 0.4903224 |
| KIAA0232   | 0.0280461  | 0.4915585 |
| ZNF337-AS1 | -0.015614  | 0.491679  |
| MOSPD1     | 0.0033198  | 0.4921022 |
| AC136944.2 | -0.0305634 | 0.4922011 |
| TMED5      | -0.0372292 | 0.4936619 |
| ZNF286A    | 0.0776223  | 0.4937351 |
| PVR        | 0.0327431  | 0.4942169 |
| HDLBP      | 0.0093614  | 0.4949315 |
| ZBTB25     | -0.0076855 | 0.4958675 |
| DIS3L      | -0.0193905 | 0.4959984 |
| KATNB1     | 0.0500562  | 0.4967887 |
| UBE2Q1     | 0.0653839  | 0.4974861 |
| EMC8       | 0.0056858  | 0.4980466 |
| EFCAB11    | -0.0128388 | 0.4983206 |
| CHRNA1     | -0.0435975 | 0.4988825 |
| ZC3HAV1    | -0.0185308 | 0.4994447 |
| ZNF717     | -0.0093345 | 0.4996482 |

|             |            |           |
|-------------|------------|-----------|
| CHST12      | -0.0211667 | 0.5000245 |
| PTPN18      | 0.0223608  | 0.5025825 |
| ZNF254      | -0.0201176 | 0.5035806 |
| AC146944.4  | -0.0159262 | 0.503679  |
| RRP8        | 0.0467711  | 0.5045303 |
| PROK2       | -0.0505225 | 0.5073344 |
| GABPB2      | -0.0314063 | 0.509293  |
| RARA        | -0.0008144 | 0.5102928 |
| POLR3GL     | 0.0173522  | 0.5104584 |
| KCTD6       | 0.0095097  | 0.5113734 |
| MRRF        | -0.0058672 | 0.5122862 |
| AL031595.3  | -0.0032709 | 0.5133379 |
| LINC01943   | 0.0257417  | 0.5133846 |
| SON         | -0.1443359 | 0.5136874 |
| EIF4G3      | 0.0168426  | 0.5137127 |
| FBXO46      | -0.0216886 | 0.5137397 |
| AC021016.2  | -0.0247698 | 0.5156543 |
| CASP9       | -0.0153206 | 0.515997  |
| PPP3CB      | -0.0204617 | 0.5166724 |
| MYO5C       | 0.0772865  | 0.5187078 |
| AL512625.3  | 0.0114723  | 0.5197746 |
| THADA       | -0.0236645 | 0.5204213 |
| STRBP       | -0.0463767 | 0.5215472 |
| ADGRE1      | -0.0343405 | 0.5216935 |
| CHMP7       | -0.0058163 | 0.5235904 |
| ZNF765      | -0.0194896 | 0.5240732 |
| SLC39A3     | -0.0245825 | 0.5256474 |
| IFT122      | -0.0206182 | 0.5260616 |
| PARP11      | -0.0314102 | 0.5270596 |
| FAF1        | -0.0102503 | 0.5273653 |
| PHTF2       | 0.0043348  | 0.5282482 |
| OGA         | 0.0032284  | 0.5288077 |
| SAMD9L      | 0.0346319  | 0.5299257 |
| TBRG1       | -0.0670843 | 0.5303502 |
| RHOC        | 0.0803107  | 0.5309504 |
| ARFIP2      | -0.0050184 | 0.5321032 |
| G2E3        | -0.0204062 | 0.5333287 |
| TMEM159     | 0.0136454  | 0.5336014 |
| TFIP11      | -0.0018044 | 0.5336424 |
| FARS2       | 0.0531564  | 0.5339146 |
| FBF1        | -0.0048237 | 0.5352703 |
| ZNF528-AS1  | -0.0705998 | 0.5352937 |
| NR2C2AP     | 0.0284035  | 0.535912  |
| PADI4       | 0.1390482  | 0.5360262 |
| FAR1        | 0.0057135  | 0.5390529 |
| GOLGA1      | 0.032074   | 0.5391251 |
| WT1         | 0.0207635  | 0.5406305 |
| ZWILCH      | 0.0034419  | 0.5408513 |
| DENR        | 0.0279668  | 0.5412058 |
| C21orf62-AS | -0.0356265 | 0.5423177 |



|            |            |           |
|------------|------------|-----------|
| MORC2-AS1  | 0.0024489  | 0.5424038 |
| UBE2Z      | 0.038396   | 0.5433137 |
| NT5DC3     | 0.0032574  | 0.545076  |
| LYPLA1     | -0.0442474 | 0.5454155 |
| PTPN9      | -0.0328087 | 0.5471058 |
| ZNF567     | -0.0020566 | 0.5486945 |
| EPB41L2    | -0.0099364 | 0.5499951 |
| ZNF197     | -0.0027966 | 0.5503408 |
| AGA        | -9.902E-05 | 0.5509036 |
| SOGA1      | -0.0139883 | 0.5525598 |
| ZNF528     | -0.0335256 | 0.5529144 |
| XKR8       | 0.0061842  | 0.5547083 |
| CCNJ       | -0.0373294 | 0.554857  |
| UNC45A     | 0.0140571  | 0.5554817 |
| GLCE       | -0.0095833 | 0.5555262 |
| CTC1       | -0.0100934 | 0.5558879 |
| DOT1L      | -0.0061564 | 0.5563143 |
| AKAP10     | -0.0568529 | 0.5564243 |
| CLEC16A    | -0.0177281 | 0.5568661 |
| PUS3       | -0.0383303 | 0.5570546 |
| AC025171.2 | -0.0697861 | 0.5585323 |
| AL353194.1 | 0.0273855  | 0.5610669 |
| FAM160A2   | -0.0279974 | 0.5615279 |
| ZNF724     | 0.0018598  | 0.5616823 |
| HARS2      | -0.0211462 | 0.5621112 |
| ZNF667     | 0.0179185  | 0.562772  |
| POLG       | -0.0208604 | 0.5632975 |
| CHMP4A     | 0.0056293  | 0.565901  |
| TMEM116    | -0.0177455 | 0.5662528 |
| CUL2       | -0.0335821 | 0.5679297 |
| FBXW9      | 0.0608652  | 0.5681655 |
| CSE1L      | 0.0266708  | 0.5709312 |
| HSD17B1    | -0.0053549 | 0.5713285 |
| ZNF248     | -0.0229332 | 0.5716184 |
| ANO10      | 0.0031475  | 0.5743568 |
| HBS1L      | -0.0093566 | 0.5748687 |
| SLK        | 0.0405058  | 0.5767241 |
| TNFAIP8L2  | 0.0455699  | 0.5769915 |
| DSTN       | -0.0137372 | 0.5775256 |
| FAM13A-AS  | -0.0353058 | 0.5782154 |
| WDR27      | 0.0315713  | 0.580239  |
| MAP1S      | -0.0634395 | 0.5804417 |
| LONP1      | 0.0182054  | 0.5818568 |
| CXorf40B   | -0.0078242 | 0.5830173 |
| CRACR2A    | -0.0123312 | 0.584093  |
| ZNF138     | -0.0274016 | 0.5885035 |
| MMS19      | 0.009464   | 0.5899964 |
| LRP5       | -0.0021312 | 0.5916365 |
| PGM1       | 0.0171035  | 0.5941762 |
| MOAP1      | -0.0052579 | 0.5952871 |

|            |            |           |
|------------|------------|-----------|
| HCG18      | -0.1029943 | 0.5971361 |
| TNFAIP2    | -0.0472063 | 0.5988688 |
| SGMS1      | 0.0453466  | 0.5992844 |
| TRUB1      | 0.0055715  | 0.5993034 |
| SMARCA5    | 0.07196    | 0.6015235 |
| TRIM52     | -0.0008128 | 0.6017657 |
| AC005838.2 | -0.0048919 | 0.6022577 |
| TACO1      | 0.0432071  | 0.6042568 |
| MTERF4     | -0.0211334 | 0.604455  |
| ATG2B      | -0.0314147 | 0.6059898 |
| TIFA       | -0.02788   | 0.6068541 |
| SCFD1      | -0.0073573 | 0.6071248 |
| ING5       | -0.0022865 | 0.6089289 |
| ZDHHC8     | 0.0100771  | 0.6108417 |
| MCTP1      | 0.0337964  | 0.6134734 |
| MIER3      | 0.0044109  | 0.6142769 |
| CLIC4      | 0.034738   | 0.6152743 |
| DNASE1L1   | -0.011023  | 0.6154393 |
| EXOSC1     | 0.0119962  | 0.6155604 |
| SUSD3      | 0.0680761  | 0.6160937 |
| NF1        | -0.0420284 | 0.6174711 |
| CCT6B      | -0.0147781 | 0.617735  |
| ARF1       | 0.0808513  | 0.6194929 |
| ATP5ME     | -0.1111152 | 0.6208871 |
| DDX60      | 0.0058705  | 0.6214594 |
| ZDHHC13    | -0.039596  | 0.623081  |
| NAIP       | -0.0904427 | 0.6247721 |
| NBR1       | -0.0370826 | 0.6247975 |
| INPP5A     | -0.0137923 | 0.625369  |
| BEX4       | 0.0466171  | 0.6257139 |
| ISY1       | -0.0140279 | 0.6288503 |
| AC008393.1 | -0.0149533 | 0.6300328 |
| PVT1       | 0.0576475  | 0.6312053 |
| PFAS       | 0.0275765  | 0.6317447 |
| ZNF512B    | 0.0240632  | 0.6330628 |
| GNB2       | 0.0439982  | 0.6331147 |
| NIPSNAP1   | 0.0086653  | 0.6332246 |
| A1BG-AS1   | 0.0190766  | 0.6348831 |
| AC159540.2 | 0.0204273  | 0.6351622 |
| C7orf31    | -0.0142409 | 0.6351657 |
| ZUP1       | -0.0047812 | 0.6359639 |
| TESK2      | -0.0374552 | 0.6362095 |
| DNAJC21    | -0.0088993 | 0.6367019 |
| TRIP6      | 0.0467391  | 0.6372917 |
| PIIP5K2    | -0.0425169 | 0.6375212 |
| MAP3K13    | -0.0249741 | 0.6393126 |
| GABPB1     | -0.025797  | 0.6399697 |
| MMADHC     | -0.0180548 | 0.6406245 |
| SLC25A51   | 0.0147796  | 0.6409022 |
| BATF       | 0.0024371  | 0.6417677 |

|            |            |           |
|------------|------------|-----------|
| SUFU       | -0.007226  | 0.6438354 |
| ATP13A1    | 0.0328739  | 0.6446386 |
| AAR2       | 0.0156413  | 0.6471961 |
| SLC26A2    | -0.144132  | 0.6480741 |
| NOP58      | 0.075801   | 0.6486934 |
| KYNU       | -0.0055548 | 0.6497858 |
| ZNF445     | 0.0007951  | 0.649974  |
| ENPP4      | 0.0066754  | 0.6517788 |
| C20orf197  | 0.0783514  | 0.652219  |
| AC008875.3 | 0.0187131  | 0.6537732 |
| WDR47      | -0.0041388 | 0.6545885 |
| ERLEC1     | 0.0133256  | 0.6550805 |
| TMEM67     | 0.014314   | 0.6553505 |
| KLHL36     | -0.0376023 | 0.6563947 |
| HUS1       | -0.0358893 | 0.6602596 |
| MFNG       | -0.0057723 | 0.6608376 |
| UHRF1BP1L  | -0.0513816 | 0.6649299 |
| RACGAP1    | -0.0110131 | 0.6652267 |
| SPTY2D1    | 0.0445563  | 0.6656131 |
| ZNF107     | -0.0447862 | 0.6664178 |
| GMEB1      | -0.0407207 | 0.6665874 |
| NATD1      | -0.0027279 | 0.6679523 |
| SNAP23     | -0.0463417 | 0.6689536 |
| CAPZA1     | -0.0849886 | 0.6690252 |
| ST6GALNAC  | -0.0012378 | 0.6729944 |
| MFHAS1     | 0.072005   | 0.6730946 |
| MLC1       | -0.0387255 | 0.6743391 |
| NEDD9      | 0.0563886  | 0.6750326 |
| HAUS6      | 0.0180409  | 0.676632  |
| ZNF282     | 0.0289257  | 0.6766712 |
| CCNG1      | -0.0805185 | 0.6767665 |
| PYGB       | -0.009478  | 0.6769796 |
| CRY2       | -0.0180142 | 0.6784166 |
| BISPR      | 0.0102763  | 0.6799042 |
| PTPN12     | -0.0497859 | 0.6799078 |
| NR6A1      | 0.0109129  | 0.6809712 |
| CDC42-IT1  | -0.024127  | 0.6824281 |
| PHOSPHO2   | 0.0076152  | 0.6842497 |
| AC024075.2 | -0.0252987 | 0.6880247 |
| UTRN       | 0.0513067  | 0.6913465 |
| ABCC5      | -0.0243543 | 0.6918247 |
| CAMLG      | -0.1071165 | 0.6934691 |
| JUP        | 0.0708463  | 0.6941482 |
| SEL1L      | -0.0334942 | 0.6943422 |
| AC120053.1 | -0.0497909 | 0.6947543 |
| PLEKHB2    | -0.028955  | 0.6968469 |
| PSME4      | -0.0492828 | 0.6972064 |
| ANKRD17    | -0.0183351 | 0.697247  |
| AK2        | -0.1467579 | 0.6975576 |
| SOCS4      | 0.0344541  | 0.6981568 |

|            |            |           |
|------------|------------|-----------|
| B3GNT8     | -0.0177982 | 0.698282  |
| UBXN8      | 0.0180867  | 0.701327  |
| EIF3J-DT   | -0.0234522 | 0.7041272 |
| ZC3H6      | -0.0138185 | 0.7048053 |
| AC007878.1 | -0.0058141 | 0.7053858 |
| CNBD2      | -0.0108924 | 0.7055223 |
| AC078883.1 | 0.0236815  | 0.7056786 |
| ZNF865     | -0.0471325 | 0.7090999 |
| NDUFB9     | -0.0415686 | 0.711448  |
| SAMD10     | 0.0322691  | 0.7142124 |
| ZNF280D    | -0.0071053 | 0.7149125 |
| TYW1B      | -0.0449554 | 0.7152221 |
| CD63       | 0.1709855  | 0.7168632 |
| ACSL4      | -0.0109931 | 0.7178147 |
| ESCO1      | 0.0023864  | 0.7182226 |
| TRAK1      | -0.011602  | 0.7226561 |
| ASPH       | -0.022024  | 0.723377  |
| TRIM59     | 0.0071133  | 0.7265349 |
| TMEM135    | 0.028688   | 0.7287244 |
| CLN6       | 0.0242136  | 0.7296543 |
| USP30-AS1  | 0.0017614  | 0.7314675 |
| FDFT1      | -0.0795393 | 0.7315243 |
| AL138724.1 | -0.000264  | 0.7319252 |
| TMEM9      | 0.0048466  | 0.731929  |
| MIR1915HG  | 0.0321908  | 0.732396  |
| AC009118.3 | -0.0119844 | 0.7330408 |
| ZFP28      | -0.0066747 | 0.7334967 |
| GBE1       | 0.0144188  | 0.7345809 |
| ZNF174     | 0.0097388  | 0.7358493 |
| CMSS1      | 0.0709199  | 0.7363535 |
| PRPS1      | -0.0090352 | 0.7365682 |
| SECISBP2   | -0.0801671 | 0.7368386 |
| AL391832.2 | 0.0171144  | 0.7370393 |
| CDK5RAP1   | -0.0126712 | 0.7375006 |
| HNRNPA3    | -0.004121  | 0.7388553 |
| TRAM2      | -0.0035932 | 0.7401589 |
| AARS       | 0.0170994  | 0.7416385 |
| HDHD5      | 0.0200622  | 0.7416842 |
| TOB1       | -0.0302917 | 0.74351   |
| RGPD2      | -0.0171589 | 0.7453141 |
| KDM5A      | -0.036481  | 0.7485415 |
| ZBTB48     | -0.0060476 | 0.7487873 |
| OAT        | -0.024336  | 0.7500163 |
| CHEK2      | 0.0127759  | 0.7511306 |
| KLHL7      | 0.0107112  | 0.7535965 |
| RASGRP4    | 0.0574816  | 0.7540983 |
| ZNF879     | -0.0137803 | 0.7562944 |
| POGK       | -0.0175584 | 0.7592183 |
| ZNF713     | -0.0435666 | 0.7599032 |
| ZNF845     | 0.0056741  | 0.7603026 |

|            |            |           |
|------------|------------|-----------|
| SUPT4H1    | -0.0132441 | 0.760487  |
| AHCYL2     | -0.0292364 | 0.7614014 |
| YOD1       | -0.047886  | 0.7622866 |
| GALNT7     | -0.0191593 | 0.762483  |
| ADD3       | 0.0066483  | 0.7632862 |
| MAML3      | 0.0480509  | 0.7638869 |
| RIPK2      | 0.0054843  | 0.7657137 |
| RHBDF2     | 0.0172846  | 0.7683265 |
| SORBS3     | 0.056574   | 0.7725172 |
| ERAL1      | -0.018861  | 0.7737976 |
| RAF1       | -0.0715362 | 0.7746755 |
| TYSND1     | 0.0202866  | 0.7756739 |
| TRIM25     | -0.0168132 | 0.7756954 |
| SARS2      | 0.0325533  | 0.7764564 |
| IGBP1      | 0.0014137  | 0.7792964 |
| ACAT1      | -0.0051102 | 0.7864199 |
| HNRNPK     | -0.1291092 | 0.7874177 |
| C22orf34   | -0.0173106 | 0.7896531 |
| TMEM214    | -0.0174341 | 0.792758  |
| UFL1       | 0.0078879  | 0.793222  |
| FLAD1      | -0.0228069 | 0.793914  |
| FOXJ2      | -0.0048158 | 0.7946293 |
| CHMP2B     | 0.0297364  | 0.7953238 |
| AL133243.2 | -0.0009501 | 0.7975556 |
| PPA1       | 0.1398142  | 0.7986804 |
| MAPK8      | -0.0376501 | 0.7988974 |
| IMMT       | 0.0547835  | 0.799896  |
| FBXO33     | -0.0120049 | 0.8015671 |
| FAM53C     | -0.0101343 | 0.8039068 |
| ABHD16A    | 0.0255162  | 0.8041545 |
| CSAD       | -0.0087731 | 0.8045004 |
| TRERF1     | 0.0524867  | 0.8068872 |
| TAGLN      | 0.0699948  | 0.8091277 |
| KANSL3     | -0.02198   | 0.8124152 |
| TSNAX      | -0.0679587 | 0.8132695 |
| ZNF778     | -0.0118295 | 0.8161422 |
| NEDD8      | 0.1068926  | 0.8168801 |
| BLOC1S3    | 0.0194278  | 0.8182327 |
| HOXA5      | 0.0215007  | 0.819107  |
| ZNF549     | -0.0219953 | 0.8199508 |
| HERPUD2    | -0.0367124 | 0.8208394 |
| MIPEP      | -0.0170215 | 0.8221803 |
| IRF9       | 0.032642   | 0.8248552 |
| SMC5       | 0.009324   | 0.8260361 |
| AC009005.1 | -0.0397625 | 0.8280611 |
| AARS2      | -0.0040506 | 0.8286033 |
| GABPB1-IT1 | -0.0063042 | 0.829233  |
| KPTN       | 0.0687437  | 0.8295974 |
| TATDN1     | 0.0083228  | 0.8298461 |
| CPSF1      | -0.0329406 | 0.8309409 |

|            |            |           |
|------------|------------|-----------|
| PAIP2      | -0.0261175 | 0.833109  |
| INTS6L     | 0.012283   | 0.8334709 |
| GINM1      | -0.0023231 | 0.8338766 |
| ZXDB       | -0.0042464 | 0.8357607 |
| MED28      | -0.0643457 | 0.8374357 |
| COG8       | -0.0361181 | 0.8408327 |
| VOPP1      | -0.0271452 | 0.8425523 |
| MED17      | 0.0112504  | 0.8436523 |
| AP1G1      | -0.0270342 | 0.8449488 |
| MTHFR      | -0.0303665 | 0.8470624 |
| DDI2       | 0.0007335  | 0.8498389 |
| STK3       | 0.0051541  | 0.8500934 |
| AMZ2       | -0.0069261 | 0.8502104 |
| TAPT1-AS1  | -3.354E-05 | 0.8513717 |
| TECPR2     | -0.0046408 | 0.8526359 |
| H1FX       | 0.2749199  | 0.8528826 |
| QSER1      | -0.0218814 | 0.8529582 |
| ADAM10     | -0.0453812 | 0.8547512 |
| SH3D21     | 0.0566135  | 0.8574374 |
| SLC30A1    | -0.0209744 | 0.8603645 |
| REXO5      | -0.0062098 | 0.8622969 |
| POLE4      | 0.0676466  | 0.8624015 |
| ZNF646     | -0.0041369 | 0.8625607 |
| HIC2       | 0.0430532  | 0.8629703 |
| OGDH       | 0.0197452  | 0.8635748 |
| APH1B      | 0.0158389  | 0.8660546 |
| ECHS1      | 0.0636351  | 0.8663703 |
| AC016831.5 | 0.0660718  | 0.8670715 |
| CENPT      | 0.0030644  | 0.8673172 |
| ZBTB18     | -0.0286353 | 0.8674596 |
| HSPA14.1   | -0.0313965 | 0.8696552 |
| PPM1D      | -0.0083116 | 0.8742067 |
| SERF1A     | -0.0170194 | 0.8745542 |
| ELOA       | 0.0036884  | 0.8762605 |
| ELF4       | -0.0406641 | 0.8857519 |
| CD2AP      | 0.0715383  | 0.8865228 |
| AL355001.2 | 5.64E-05   | 0.8867377 |
| UBE2B      | 0.0455101  | 0.8873154 |
| ZSCAN5A    | 0.0329479  | 0.8923019 |
| TBC1D16    | -0.0428128 | 0.8926465 |
| TMEM25     | 0.0545511  | 0.8934878 |
| IPO13      | 0.0074176  | 0.8948818 |
| APPL2      | 0.0060242  | 0.8970777 |
| AC022973.5 | -0.0136094 | 0.8995265 |
| DESI2      | 0.0458992  | 0.899968  |
| POMP       | -0.0352275 | 0.9006373 |
| CEP41      | -0.0288572 | 0.9014048 |
| CHCHD3     | 0.0406126  | 0.9014549 |
| ZPR1       | 0.0117124  | 0.9021155 |
| ARHGAP17   | 0.0161678  | 0.9064561 |

|            |            |           |
|------------|------------|-----------|
| SLC19A1    | 0.0325737  | 0.9076084 |
| ABRAXAS1   | -0.0230139 | 0.9118925 |
| MEST       | 0.0177879  | 0.91393   |
| PRDX2      | 0.1811329  | 0.914193  |
| PPP1R26    | -0.0112749 | 0.9159705 |
| ACSS2      | -0.0038963 | 0.9174385 |
| NOL8       | -0.0327237 | 0.9189702 |
| UTP4       | -0.0177908 | 0.9203449 |
| NEK3       | 0.0115225  | 0.9205872 |
| ARAP1      | -0.0199977 | 0.920806  |
| EIF3M      | -0.0757326 | 0.9212041 |
| SLC9B2     | 0.0291489  | 0.9212835 |
| MIR762HG   | -0.0232461 | 0.9222158 |
| ZNF141     | -0.0501497 | 0.9250881 |
| BRAF       | -0.1054884 | 0.9262294 |
| ANAPC2     | -0.0370085 | 0.9267839 |
| AC108134.3 | 0.0213149  | 0.9295742 |
| FCHO2      | -0.0009709 | 0.9334432 |
| MPO        | 0.4011183  | 0.9373652 |
| C8orf82    | 0.0105777  | 0.9374054 |
| GXYLT1     | -0.015959  | 0.938821  |
| CYB561D1   | -0.0187501 | 0.9409579 |
| TLR2       | -0.0466633 | 0.9431799 |
| LINC00893  | 0.0156194  | 0.9447912 |
| URI1       | 0.0460715  | 0.9476792 |
| TIE1       | 0.0221252  | 0.9490204 |
| CCDC71     | -0.027965  | 0.9491636 |
| AL133243.3 | -0.0195399 | 0.9494525 |
| EEF1D      | 0.1312771  | 0.9494793 |
| ZNF385A    | 0.0317941  | 0.9508697 |
| ATP6AP2    | -0.0283274 | 0.9517297 |
| CGRRF1     | 0.0189661  | 0.9519689 |
| AL096865.1 | 0.0038746  | 0.952494  |
| MTDH       | 0.1790687  | 0.9534151 |
| C17orf58   | 0.0267014  | 0.9539656 |
| LARS2      | 0.0023895  | 0.9541308 |
| CRELD2     | 0.0222481  | 0.9567824 |
| GTF2H5     | 0.0469746  | 0.9596058 |
| IPMK       | -0.0428861 | 0.961436  |
| AC021097.2 | -0.0119703 | 0.9659884 |
| KCNK5      | 0.0198648  | 0.9672468 |
| MTRR       | -0.0136435 | 0.9697508 |
| ALDH9A1    | -0.001169  | 0.9706573 |
| CASP8AP2   | 0.0433103  | 0.9716301 |
| GGT5       | 0.04479    | 0.9721095 |
| SPIRE1     | 0.0378027  | 0.9725399 |
| PRMT7      | 0.0386898  | 0.9755302 |
| SLC39A4    | 0.0404198  | 0.9764266 |
| PIGZ       | -0.0139448 | 0.9813766 |
| ANXA11     | 0.0041243  | 0.9815407 |

|            |            |           |
|------------|------------|-----------|
| LIMA1      | 0.0711687  | 0.981865  |
| ZNF747     | -0.0044963 | 0.9867515 |
| MTFP1      | 0.0147975  | 0.9905214 |
| ABAT       | 0.0091604  | 0.9929246 |
| IFT80      | 0.0233544  | 0.9932996 |
| UBE2V1     | 0.0400971  | 0.994887  |
| VRK2       | 0.0070369  | 0.9962308 |
| ODF2L      | -0.0371391 | 0.998289  |
| COPS8      | -0.0221109 | 0.9989555 |
| APPBP2     | 0.0485767  | 0.9992416 |
| ZCCHC14    | 0.0005722  | 0.9998119 |
| MED31      | 0.0031673  | 1         |
| RETSAT     | -0.0088158 | 1         |
| MTG1       | 0.0202452  | 1         |
| SLC16A7    | 0.0499864  | 1         |
| PPCS       | -0.0474045 | 1         |
| ZNF552     | -0.0159793 | 1         |
| RWDD2B     | -0.0065537 | 1         |
| RAP2C-AS1  | -0.0124662 | 1         |
| CHMP5      | -0.0496034 | 1         |
| UTP3       | 0.0511854  | 1         |
| TCP11L2    | -0.011173  | 1         |
| TCEAL4     | 0.1042863  | 1         |
| C6orf226   | -0.0169448 | 1         |
| ATXN7L3    | -0.0442742 | 1         |
| RFTN1      | 0.0265306  | 1         |
| PJA1       | -0.0027308 | 1         |
| ERC1       | -0.0086281 | 1         |
| PROM1      | 0.1459467  | 1         |
| TOB2       | 0.0242208  | 1         |
| AF117829.1 | -0.0048861 | 1         |
| BTG3       | 0.002698   | 1         |
| SNX3       | -0.0906144 | 1         |
| PLCE1      | -0.0143738 | 1         |
| PDPR       | -0.0112361 | 1         |
| ZBED5-AS1  | 0.0002813  | 1         |
| CDIP1      | 0.0078187  | 1         |
| KIAA1841   | -0.0081596 | 1         |
| CAPN2      | 0.0454777  | 1         |
| NENF       | 0.100696   | 1         |
| TTF1       | -0.0105157 | 1         |
| FRA10AC1   | 0.0198335  | 1         |
| ZC3H10     | -0.0208359 | 1         |
| FAM135A    | -0.0252716 | 1         |
| SLC25A35   | -0.0100923 | 1         |
| MED7       | 0.0227503  | 1         |
| AC114980.1 | -0.0041235 | 1         |
| ARL14EP    | 0.0130525  | 1         |
| CROT       | -0.0397174 | 1         |
| NAALADL1   | 0.0273892  | 1         |



|            |            |   |
|------------|------------|---|
| TUT1       | 0.0072183  | 1 |
| ACTR2      | -0.1107905 | 1 |
| AL391684.1 | -0.036213  | 1 |
| OXR1       | 0.016553   | 1 |
| NDC1       | 0.0118003  | 1 |
| GNPDA2     | -0.023345  | 1 |
| EML2       | 0.0026663  | 1 |
| SPTBN1     | 0.0474994  | 1 |
| CAD        | 0.013147   | 1 |
| RSF1       | 0.0434232  | 1 |
| TMEM131    | -0.1087435 | 1 |
| HDDC2      | -0.0117093 | 1 |
| N4BP2      | -0.0383351 | 1 |
| RAD21      | -0.0122059 | 1 |
| MMAB       | 0.0288305  | 1 |
| AC104532.2 | 0.0142278  | 1 |
| ZNF681     | -0.0294091 | 1 |
| WARS2      | 0.0180432  | 1 |
| DCAF10     | -0.0249887 | 1 |
| CMPK2      | -0.0489935 | 1 |
| P2RX7      | -0.0187824 | 1 |
| RPTOR      | -0.0071549 | 1 |
| CARNMT1    | -0.0487114 | 1 |
| S100B      | 0.148342   | 1 |
| PIP4K2C    | -0.0293848 | 1 |
| UBE2D1     | -0.0373066 | 1 |
| SCRIB      | -0.0008999 | 1 |
| KIF9-AS1   | 0.0220376  | 1 |
| PLIN2      | -0.1274322 | 1 |
| WDR89      | 0.0295794  | 1 |
| CD302      | 0.1043704  | 1 |
| RASSF1     | 0.0529416  | 1 |
| CHCHD10    | 0.0401577  | 1 |
| TOE1       | -0.0099582 | 1 |
| ATP6AP1L   | -0.0139842 | 1 |
| CHCHD5     | 0.0234922  | 1 |
| TSN        | -0.0482892 | 1 |
| ITPRID2    | -0.068951  | 1 |
| SARM1      | 0.0166619  | 1 |
| C16orf72   | 0.0228458  | 1 |
| MINDY1     | 0.0047689  | 1 |
| PHGDH      | 0.0975785  | 1 |
| RAD50      | 0.092377   | 1 |
| EID1       | 0.0662223  | 1 |
| AOPEP      | 0.0149478  | 1 |
| RAB27A     | -0.1182897 | 1 |
| SSR3       | 0.0155667  | 1 |
| DESI1      | 0.0639329  | 1 |
| C12orf43   | 0.0143101  | 1 |
| CCDC58     | -0.018379  | 1 |

|            |            |   |
|------------|------------|---|
| CYTIP      | 0.0977523  | 1 |
| PHF20      | 0.0452822  | 1 |
| SAV1       | -0.0163529 | 1 |
| FEM1C      | 0.00025    | 1 |
| ORMDL3     | 0.0193794  | 1 |
| MTIF2      | 0.0074471  | 1 |
| USP46      | -0.0055002 | 1 |
| AFG1L      | -0.0138947 | 1 |
| YWHAG      | -0.1182718 | 1 |
| PTPN2      | -0.0441397 | 1 |
| KATNAL1    | -0.0013155 | 1 |
| OXS1       | 0.0061614  | 1 |
| ZNF398     | -0.0009879 | 1 |
| TEX22      | 0.0291252  | 1 |
| OTULIN     | -0.0250012 | 1 |
| BLM        | 0.0181468  | 1 |
| ZNF558     | -0.0042453 | 1 |
| TBK1       | -0.037403  | 1 |
| GYS1       | -0.033483  | 1 |
| AL365272.1 | 0.0069083  | 1 |
| ZNF8       | -0.0338075 | 1 |
| VPS29      | -0.0001557 | 1 |
| TYMP       | -0.0419474 | 1 |
| AP2A2      | -0.0149023 | 1 |
| TNRC6A     | -0.0387188 | 1 |
| VENTX      | 0.0316376  | 1 |
| NVL        | -0.0170931 | 1 |
| CCDC88B    | -0.055299  | 1 |
| FTSJ1      | 0.0054817  | 1 |
| DNAJC27    | 0.0074403  | 1 |
| SRSF7      | 0.1353227  | 1 |
| ACBD4      | 0.0318713  | 1 |
| DBT        | -0.0632201 | 1 |
| MTCH2      | 0.0231006  | 1 |
| CPQ        | -0.0064892 | 1 |
| EIF3C      | -0.0356686 | 1 |
| TAF1B      | 0.0359006  | 1 |
| MYO9B      | -0.0330304 | 1 |
| NFE2L3     | -0.0764244 | 1 |
| MARCH7     | 0.0053706  | 1 |
| ARMC6      | 0.0271781  | 1 |
| TFAP4      | -0.0074902 | 1 |
| TMTC3      | -0.007129  | 1 |
| PSTPIP2    | 0.0226121  | 1 |
| POLL       | -0.0200555 | 1 |
| ING1       | -0.0031324 | 1 |
| HACD2      | -0.0179024 | 1 |
| STX17      | -0.0487698 | 1 |
| DIS3       | -0.0030647 | 1 |
| CPT2       | 0.0065512  | 1 |

|            |            |   |
|------------|------------|---|
| CIPC       | 0.0006374  | 1 |
| TIGD2      | 0.0104465  | 1 |
| AC007066.2 | -0.0246994 | 1 |
| FBXW4      | -0.0032329 | 1 |
| TIMM9      | 0.0373377  | 1 |
| FBXO41     | 0.0059727  | 1 |
| UBE3B      | -0.0389747 | 1 |
| CLP1       | -0.0159978 | 1 |
| ATXN7      | 0.0418377  | 1 |
| MTAP       | 0.0299931  | 1 |
| LINC01002  | -0.0234418 | 1 |
| HOMEZ      | -0.0099293 | 1 |
| DBR1       | 0.0019763  | 1 |
| PFKL       | 0.0127263  | 1 |
| NUDT5      | 0.0471178  | 1 |
| EIF3D      | 0.0937087  | 1 |
| PRPF4      | -0.0027295 | 1 |
| TGDS       | 0.0024184  | 1 |
| PSMD7      | 0.0399739  | 1 |
| RTN3       | -0.1166619 | 1 |
| AC009506.1 | 0.037589   | 1 |
| MIDN       | -0.0024057 | 1 |
| MAP3K3     | 0.0213833  | 1 |
| CCRL2      | 0.0229653  | 1 |
| MANEA      | 0.0213443  | 1 |
| ZBTB47     | 0.0065689  | 1 |
| TAX1BP3    | -0.0290347 | 1 |
| ZNF519     | -0.0119314 | 1 |
| COG7       | 0.0445255  | 1 |
| CD83       | -0.0121837 | 1 |
| SHPK       | -0.0026331 | 1 |
| ATP6V1E2   | 0.0127017  | 1 |
| MPP6       | 0.0692785  | 1 |
| AUTS2      | 0.0724959  | 1 |
| RAB38      | 0.0742433  | 1 |
| MED14      | -0.0564356 | 1 |
| ING2       | -0.0114382 | 1 |
| RABL3      | 0.0115163  | 1 |
| DHX57      | -0.002058  | 1 |
| BZW2       | 0.1200339  | 1 |
| SLC35D2    | -0.0195186 | 1 |
| TPMT       | -0.0187389 | 1 |
| FANCB      | 0.01009    | 1 |
| VPS50      | -0.0324697 | 1 |
| ZNF354C    | 0.0091068  | 1 |
| TAF1A      | -0.006004  | 1 |
| TMEM138    | -0.0368684 | 1 |
| PSPH       | -0.0159072 | 1 |
| RASA2      | -0.0115329 | 1 |
| USP14      | -0.0103069 | 1 |

|            |            |   |
|------------|------------|---|
| LINC01006  | 0.0026289  | 1 |
| PLAUR      | 0.0026833  | 1 |
| TMEM241    | -0.0057938 | 1 |
| OLA1       | 0.001133   | 1 |
| AL356599.1 | -0.0127393 | 1 |
| MTLN       | 0.0445768  | 1 |
| GLA        | -0.0022505 | 1 |
| TIMM10B    | -0.0078218 | 1 |
| BCL2A1     | 0.0429421  | 1 |
| C19orf53   | 0.1475728  | 1 |
| ERBIN      | -0.0229948 | 1 |
| CCDC43     | -0.0001614 | 1 |
| LMAN2L     | -0.0180228 | 1 |
| PHF20L1    | -0.0875014 | 1 |
| PSMB3      | 0.0047879  | 1 |
| FBXL13     | -0.0085307 | 1 |
| CCDC69     | -0.0495665 | 1 |
| MYD88      | 0.0172413  | 1 |
| IFIT5      | 0.0245607  | 1 |
| ZBTB10     | 0.0125464  | 1 |
| SERTAD1    | 0.0442757  | 1 |
| LRRC42     | -0.0009076 | 1 |
| SLC12A7    | 0.0599928  | 1 |
| ELAC1      | 0.0062533  | 1 |
| FAM133B    | -0.0118816 | 1 |
| IMP3       | -0.0358163 | 1 |
| DAGLB      | -0.0317625 | 1 |
| TYMSOS     | 0.0071924  | 1 |
| SESTD1     | -0.0410056 | 1 |
| TRIM58     | -0.0698197 | 1 |
| BMP1       | -0.0116962 | 1 |
| CXXC5      | -0.1278321 | 1 |
| PEX26      | -0.0644871 | 1 |
| PTGER4     | 0.0283571  | 1 |
| SSB        | 0.119725   | 1 |
| PSMB4      | -0.0029041 | 1 |
| KCMF1      | -0.0551321 | 1 |
| PNMA1      | -0.0104579 | 1 |
| RAPGEF2    | 0.0759452  | 1 |
| FCHO1      | -0.0112783 | 1 |
| GCC1       | 0.0137708  | 1 |
| UBA6-AS1   | -0.0285992 | 1 |
| LRRC37A2   | -0.0302766 | 1 |
| DAPK3      | -0.0176389 | 1 |
| RALGPS2    | -0.0276138 | 1 |
| AC106791.1 | -0.0246907 | 1 |
| H2AFJ      | 0.0696347  | 1 |
| ZSCAN31    | -0.0026476 | 1 |
| MIR1-1HG-A | -0.0155264 | 1 |
| RPS11      | -0.0733529 | 1 |

|            |            |   |
|------------|------------|---|
| FNTB       | -0.0343994 | 1 |
| C1RL-AS1   | 0.0241365  | 1 |
| CPEB4      | -0.0392558 | 1 |
| PIAS4      | 0.009292   | 1 |
| SH2B1      | 0.0089457  | 1 |
| NICN1      | -0.0033415 | 1 |
| PARVG      | -0.0274338 | 1 |
| CARD9      | -0.0157485 | 1 |
| AC096711.2 | -0.0277427 | 1 |
| CTIF       | -0.0177227 | 1 |
| ZNF358     | 0.0231047  | 1 |
| LINC00476  | -0.027079  | 1 |
| GLCCI1     | -0.0065198 | 1 |
| PMM2       | 0.0111068  | 1 |
| XIST       | -0.1463977 | 1 |
| ZNF426     | -0.0026729 | 1 |
| RBM41      | -0.0534333 | 1 |
| AP4B1      | -0.0018358 | 1 |
| HS1BP3     | 0.0139135  | 1 |
| OSBPL7     | -0.0071081 | 1 |
| WDR44      | -0.0044138 | 1 |
| E2F3-IT1   | -0.0132259 | 1 |
| UPF3B      | -0.0497038 | 1 |
| AC011462.5 | -0.0219735 | 1 |
| PHF21A     | -0.0254538 | 1 |
| ZNF90      | -0.0201605 | 1 |
| XRN2       | 0.0600915  | 1 |
| ZNF461     | -0.003746  | 1 |
| CPB2-AS1   | -0.0193096 | 1 |
| MEF2A      | -0.0275343 | 1 |
| CLOCK      | -0.0203895 | 1 |
| TSTD3      | -0.0118516 | 1 |
| TMEM243    | -0.0016223 | 1 |
| SLC5A6     | 0.0163902  | 1 |
| AL109628.2 | -0.0334417 | 1 |
| TSPAN3     | 0.0141245  | 1 |
| AC010623.1 | -0.0053583 | 1 |
| SUCLA2     | 0.0146266  | 1 |
| CRISPLD1   | 0.0138486  | 1 |
| TRPM7      | -0.0923598 | 1 |
| MMP17      | -0.0104081 | 1 |
| LZTR1      | -0.0101751 | 1 |
| ZNF782     | -0.0213556 | 1 |
| SMG9       | 0.013122   | 1 |
| ZNF324     | 0.0140198  | 1 |
| ABCC1      | -0.0653937 | 1 |
| ARRDC3     | -0.1149433 | 1 |
| NR4A2      | 0.0522223  | 1 |
| ZNF718     | -0.0543878 | 1 |
| AC093323.1 | -0.0279271 | 1 |

|            |            |   |
|------------|------------|---|
| FLVCR1-DT  | -0.033135  | 1 |
| ZNF625     | -0.0058343 | 1 |
| RANBP3     | -0.0124957 | 1 |
| MAU2       | -0.0538301 | 1 |
| BBS10      | 0.0027152  | 1 |
| DUS3L      | 0.0292227  | 1 |
| ANKLE1     | 0.0105929  | 1 |
| CSTF2T     | -0.0262887 | 1 |
| RUSC1      | 0.0007708  | 1 |
| SNX32      | -0.0152989 | 1 |
| CKMT2-AS1  | -0.0058326 | 1 |
| SPART-AS1  | -0.0178372 | 1 |
| PPCDC      | 0.0337486  | 1 |
| ZNF527     | -0.008716  | 1 |
| GATD1      | 0.0125347  | 1 |
| PRCC       | 0.0103544  | 1 |
| ZBTB11-AS1 | 0.0005688  | 1 |
| ZFP90      | 0.0207688  | 1 |
| RNF103     | -0.0040394 | 1 |
| RBM28      | 0.019429   | 1 |
| PPP6R1     | 0.0244321  | 1 |
| C5orf30    | 0.0217217  | 1 |
| ATPSCKMT   | -0.0163834 | 1 |
| GRINA      | 0.0137847  | 1 |
| RPUSD2     | -0.007462  | 1 |
| SRGAP2     | 0.0302921  | 1 |
| BNIP1      | 0.0013727  | 1 |
| LYRM4      | 0.0478653  | 1 |
| DHX29      | -0.0078192 | 1 |
| PPP3CC     | -0.007577  | 1 |
| ADAT1      | 0.001367   | 1 |
| USP6NL     | 0.0317357  | 1 |
| COL4A5     | 0.0260491  | 1 |
| AC110285.2 | -0.0312889 | 1 |
| ZRANB3     | -0.0047818 | 1 |
| GOT1       | 0.0073386  | 1 |
| GFOD2      | 0.0177762  | 1 |
| OAF        | 0.0901817  | 1 |
| TDP1       | -0.0170112 | 1 |
| ACAD9      | 0.0124701  | 1 |
| CNOT7      | -0.0462874 | 1 |
| MYO7B      | -0.0116873 | 1 |
| AP4E1      | -0.0275934 | 1 |
| KMT5A      | 0.0041781  | 1 |
| DZIP3      | 0.0095618  | 1 |
| PEX1       | -0.0045531 | 1 |
| CD47       | 0.1034751  | 1 |
| XPO1       | 0.0354082  | 1 |
| ERCC6L2    | -0.0469981 | 1 |
| SKAP2      | 0.0107691  | 1 |

|            |            |   |
|------------|------------|---|
| PCYOX1     | -0.0086314 | 1 |
| SLC17A5    | -0.0447065 | 1 |
| MLKL       | 0.0880788  | 1 |
| RPS2       | 0.100219   | 1 |
| SAYSD1     | 0.0078877  | 1 |
| KCNC4      | -0.0185195 | 1 |
| ERN1       | -0.0328909 | 1 |
| ZNF570     | 0.0134633  | 1 |
| GPR160     | -0.0071605 | 1 |
| PPARA      | 0.0090832  | 1 |
| CHD2       | -0.0468968 | 1 |
| ZNF136     | 0.0064986  | 1 |
| NUCKS1     | 0.1648029  | 1 |
| ELF1       | 0.119707   | 1 |
| PAXIP1     | -0.0068357 | 1 |
| TPR        | 0.0588561  | 1 |
| CCDC9      | -0.001489  | 1 |
| NT5M       | 0.0179337  | 1 |
| ZC3H15     | 0.0225501  | 1 |
| CCDC62     | -0.0117948 | 1 |
| UFSP2      | 0.0013308  | 1 |
| SPINDOC    | 0.0046025  | 1 |
| ZSCAN26    | 0.0136574  | 1 |
| ABR        | -0.017943  | 1 |
| MECP2      | -0.0509309 | 1 |
| AC015813.1 | -0.0395328 | 1 |
| UGDH       | -0.0202446 | 1 |
| ZNF512     | -0.0349294 | 1 |
| SLC23A2    | -0.0100745 | 1 |
| HIST1H1C   | 0.0759308  | 1 |
| CD300A     | 0.0413981  | 1 |
| AC006141.1 | -0.049087  | 1 |
| GTPBP3     | 0.0078763  | 1 |
| KCTD9      | 0.0337618  | 1 |
| ZNF518A    | -0.0189105 | 1 |
| CACYBP     | -0.1453491 | 1 |
| HHEX       | 0.0598529  | 1 |
| SLC25A40   | -0.0358102 | 1 |
| PDIK1L     | -0.0120204 | 1 |
| SPG11      | -0.049259  | 1 |
| TRAF5      | 0.0380619  | 1 |
| AL353804.1 | -0.0168892 | 1 |
| PIGO       | -0.0015788 | 1 |
| CCDC14     | -0.0716837 | 1 |
| CLIC1      | 0.1566752  | 1 |
| USP48      | 0.0267394  | 1 |
| ZSCAN21    | -0.0003706 | 1 |
| FSBP       | -0.0143142 | 1 |
| PIGBOS1    | -0.0125754 | 1 |
| NRDE2      | -0.0505315 | 1 |

|            |            |   |
|------------|------------|---|
| AC027097.1 | -0.0334532 | 1 |
| FYB1       | 0.0241868  | 1 |
| FAN1       | -0.0074531 | 1 |
| MRPL49     | -0.0190014 | 1 |
| RRN3       | -0.0191314 | 1 |
| ZNF678     | -0.0065452 | 1 |
| GBP4       | -0.1202766 | 1 |
| TRIP11     | -0.0304765 | 1 |
| CERS6      | -0.0102355 | 1 |
| AC058791.1 | 0.0306227  | 1 |
| CHEK1      | 0.0787344  | 1 |
| TRIB3      | 0.0289753  | 1 |
| PBX3       | 0.0039646  | 1 |
| ALS2       | -0.0913669 | 1 |
| TTC39C     | 0.0202349  | 1 |
| AP1AR      | -0.0271867 | 1 |
| OLIG1      | 0.0415209  | 1 |
| SEC62      | -0.0970679 | 1 |
| EIF1B-AS1  | -0.0157908 | 1 |
| NOMO3      | -0.0273378 | 1 |
| AC068205.2 | -0.0302666 | 1 |
| HVCN1      | -0.0062951 | 1 |
| APLP2      | -0.1716966 | 1 |
| C12orf45   | -0.0134934 | 1 |
| ARL2BP     | 0.0260896  | 1 |
| IRF3       | 0.0107743  | 1 |
| TAF10      | 0.0226401  | 1 |
| NFE2       | -0.1462465 | 1 |
| AC018521.5 | 0.0454745  | 1 |
| MTG2       | -0.0090988 | 1 |
| AC019080.1 | -0.0099328 | 1 |
| ZNF283     | -0.0044047 | 1 |
| NEK1       | 0.0134866  | 1 |
| FAM114A2   | 0.0317558  | 1 |
| RGS3       | 0.0098541  | 1 |
| SENCR      | 0.0645078  | 1 |
| C12orf49   | -0.026851  | 1 |
| PCGF5      | -0.0409755 | 1 |
| PRAM1      | 0.0515247  | 1 |
| ZNF71      | -0.002127  | 1 |
| BCL2L11    | -0.0264099 | 1 |
| WAS        | 0.0329861  | 1 |
| FKBP15     | 0.0312111  | 1 |
| ETV5       | -0.027076  | 1 |
| AMACR      | 0.0069391  | 1 |
| TXNL4B     | 0.0033012  | 1 |
| PKP4       | 0.0648039  | 1 |
| XPO5       | -0.0146643 | 1 |
| AL162595.1 | -0.0093132 | 1 |
| RDH5       | -0.0035585 | 1 |



|            |            |   |
|------------|------------|---|
| JADE1      | -0.0146195 | 1 |
| ETNK1      | -0.0773064 | 1 |
| TMEM65     | 0.0008254  | 1 |
| CARD8      | -0.0263938 | 1 |
| ZNF620     | -0.0004578 | 1 |
| EXOSC4     | -0.0138981 | 1 |
| PPP2R3B    | 0.039426   | 1 |
| DHRS1      | -0.0077424 | 1 |
| ATG4A      | 0.0088209  | 1 |
| RNASEH1    | -0.0038978 | 1 |
| LGALS3     | -0.059338  | 1 |
| FUNDC1     | 0.0476415  | 1 |
| HSD17B11   | -0.088475  | 1 |
| PILRB      | -0.0094253 | 1 |
| EEF1AKMT3  | -0.010124  | 1 |
| DLAT       | -0.0080494 | 1 |
| ZNF275     | 0.0166256  | 1 |
| ZNF525     | 0.0157524  | 1 |
| AL157938.3 | -0.0218883 | 1 |
| ZNF844     | -0.0388705 | 1 |
| ZNF546     | -0.0067159 | 1 |
| PPRC1      | 0.0129964  | 1 |
| SLC25A24   | 0.0303547  | 1 |
| NLE1       | 0.0187282  | 1 |
| CMTR1      | -0.0262666 | 1 |
| ACAA2      | 0.0722896  | 1 |
| DECR2      | -0.0233095 | 1 |
| EME2       | 0.0017328  | 1 |
| EEF1AKMT4  | 0.0286201  | 1 |
| MLLT11     | -0.0276216 | 1 |
| ENTPD7     | 0.0145263  | 1 |
| RAB11FIP3  | -0.0202029 | 1 |
| ZEB2       | -0.2445092 | 1 |
| MSH3       | -0.043421  | 1 |
| ARHGAP26   | 0.0606676  | 1 |
| CLTA       | 0.1038754  | 1 |
| LRCH1      | 0.011276   | 1 |
| MARK4      | -0.0183826 | 1 |
| AC020910.5 | -0.0077051 | 1 |
| NFYA       | -0.0076209 | 1 |
| KCNMB1     | 0.0441663  | 1 |
| BX842570.1 | -0.0279026 | 1 |
| PLP2       | -0.1199531 | 1 |
| TAOK2      | -0.0134145 | 1 |
| GCSAML     | 0.0655766  | 1 |
| C1QTNF3    | -0.0170858 | 1 |
| PSMA3      | -0.0093368 | 1 |
| TMEM238    | 0.0434199  | 1 |
| SLC35B4    | 0.0320099  | 1 |
| RHOBTB1    | 0.0181854  | 1 |

|            |            |   |
|------------|------------|---|
| CHD9       | -0.0637041 | 1 |
| MTMR2      | 0.0031721  | 1 |
| PSPC1      | -0.0223255 | 1 |
| TBL3       | 0.0143083  | 1 |
| IL12A      | -0.0217026 | 1 |
| AL731563.3 | -0.0257527 | 1 |
| APBA3      | -0.0053908 | 1 |
| ZNF131     | 0.0220979  | 1 |
| LINC02591  | -0.0337146 | 1 |
| TRIM52-AS1 | -0.0395408 | 1 |
| ADRB1      | -0.0103351 | 1 |
| HOXB-AS1   | -0.0175022 | 1 |
| XYLT2      | -0.0016679 | 1 |
| ATXN2      | -0.053759  | 1 |
| MPST       | 0.0187917  | 1 |
| AC007114.1 | 0.0061367  | 1 |
| AC008267.5 | 0.0162873  | 1 |
| AL359504.2 | 0.0372968  | 1 |
| AP5S1      | 0.0134566  | 1 |
| KIAA1522   | 0.0074214  | 1 |
| MZF1-AS1   | 0.0861444  | 1 |
| MCPH1-AS1  | -0.014278  | 1 |
| FYN        | 0.0786846  | 1 |
| NCAPG2     | 0.0079144  | 1 |
| LNPEP      | -0.093782  | 1 |
| ZNF250     | -0.002475  | 1 |
| MRPL58     | 0.0062561  | 1 |
| KTN1       | -0.1253851 | 1 |
| ASF1A      | -0.0419983 | 1 |
| UHRF1BP1   | -0.0437205 | 1 |
| TRMT12     | 0.0041742  | 1 |
| TBC1D5     | -0.0678496 | 1 |
| CHD3       | -0.0295114 | 1 |
| BORA       | -0.0005125 | 1 |
| MCU        | -0.001701  | 1 |
| SS18L1     | 0.0012413  | 1 |
| WDR77      | 0.0048791  | 1 |
| WRAP53     | -0.0025988 | 1 |
| ZRANB2-AS  | -0.0256441 | 1 |
| PGRMC2     | 0.0162058  | 1 |
| AC093525.6 | -0.005838  | 1 |
| DDX18      | -0.0689065 | 1 |
| FAM49B     | -0.0063122 | 1 |
| ZFAND1     | -0.006905  | 1 |
| DNAJC25    | -0.0147695 | 1 |
| CCND2      | 0.1015094  | 1 |
| SYNCRIP    | 0.0268639  | 1 |
| AC240274.1 | -0.0271883 | 1 |
| SEMA4A     | 0.0055999  | 1 |
| TRIM34     | 0.0022988  | 1 |

|            |            |   |
|------------|------------|---|
| DNAJC28    | -0.0276922 | 1 |
| MORF4L1    | -0.0872719 | 1 |
| SIRPA      | -0.0217073 | 1 |
| ANGPT2     | -0.0192912 | 1 |
| CCDC61     | 0.0014715  | 1 |
| BRK1       | 0.0537505  | 1 |
| FAM27C     | -0.0295834 | 1 |
| SSR1       | -0.0905237 | 1 |
| EHD1       | -0.0104328 | 1 |
| H3F3B      | 0.1271988  | 1 |
| SPATA5L1   | 0.0051034  | 1 |
| ANKRD44-IT | -0.0056329 | 1 |
| RGS18      | 0.0762231  | 1 |
| N4BP1      | -0.0303741 | 1 |
| FAM92A     | 0.0291822  | 1 |
| MINPP1     | -0.0157881 | 1 |
| RALGAPA1   | -0.056104  | 1 |
| RPS19      | 0.0731081  | 1 |
| HSF1       | -0.000411  | 1 |
| ZBTB42     | 0.0073379  | 1 |
| GOLGA5     | -0.0003022 | 1 |
| PLOD3      | 0.0288225  | 1 |
| DHX34      | -0.0017023 | 1 |
| MEGF9      | -0.0557104 | 1 |
| TOMM34     | 0.0118714  | 1 |
| OSGEPL1    | -0.0170179 | 1 |
| PXN-AS1    | -0.0040726 | 1 |
| DDX6       | -0.0780877 | 1 |
| ZNF106     | -0.0687195 | 1 |
| OBI1       | 0.001997   | 1 |
| PARN       | -0.0135261 | 1 |
| SPG7       | -0.0122126 | 1 |
| DNAAF5     | -0.0027484 | 1 |
| NCK1-DT    | -0.0009474 | 1 |
| LIN52      | -0.0258304 | 1 |
| OXNAD1     | -0.0111814 | 1 |
| THOC2      | -0.0125744 | 1 |
| RXYLT1     | -0.0596535 | 1 |
| ZSWIM8     | -0.0468564 | 1 |
| TCEAL1     | -0.0007539 | 1 |
| PIK3CA     | -0.0418575 | 1 |
| CHKB       | 0.008979   | 1 |
| C16orf87   | -0.0260336 | 1 |
| CIR1       | -0.0773105 | 1 |
| BTF3L4     | 0.0129835  | 1 |
| OPA1       | -0.0085917 | 1 |
| KPNA5      | -0.0759065 | 1 |
| PTEN       | -0.078647  | 1 |
| PEX6       | -0.0016673 | 1 |
| HSPBAP1    | -0.0506039 | 1 |

|            |            |   |
|------------|------------|---|
| PARD6A     | 0.0088712  | 1 |
| COQ6       | -0.0136091 | 1 |
| KDM5B      | -0.0432898 | 1 |
| PYGL       | 0.0196767  | 1 |
| PEX16      | 0.0091112  | 1 |
| ZNF329     | 0.0027111  | 1 |
| BAZ1A      | 0.0311288  | 1 |
| ACOX3      | 0.006089   | 1 |
| WT1-AS     | -0.0005182 | 1 |
| CCHCR1     | 0.0021077  | 1 |
| ZNF589     | 0.0050055  | 1 |
| ZNF326     | -0.0835589 | 1 |
| C2orf42    | -0.0118081 | 1 |
| SELENOS    | -0.0689035 | 1 |
| C11orf49   | 0.0159282  | 1 |
| PLEKHG4    | -0.0074267 | 1 |
| AGAP9      | -0.043772  | 1 |
| HMCES      | -0.0146639 | 1 |
| ZKSCAN1    | -0.0064464 | 1 |
| CCT4       | 0.0689631  | 1 |
| RHBDD3     | -0.0070636 | 1 |
| MIR99AHG   | 0.0115296  | 1 |
| DOLK       | 0.0041677  | 1 |
| CBR3-AS1   | -0.0470969 | 1 |
| TRMT10C    | 0.0707057  | 1 |
| PIEZO1     | 0.0144232  | 1 |
| CREBL2     | 0.0242065  | 1 |
| NPC1       | -0.0347035 | 1 |
| FAM161B    | -0.0107927 | 1 |
| PIK3IP1    | -0.0690627 | 1 |
| BEX3       | 0.1050337  | 1 |
| TLR1       | 0.0043574  | 1 |
| TAFA2      | 0.0658467  | 1 |
| PUM1       | -0.0578432 | 1 |
| MAP3K20    | 0.0309188  | 1 |
| ZNF440     | -0.0208741 | 1 |
| NECTIN2    | -0.0062078 | 1 |
| FAM104A    | -0.0128428 | 1 |
| AC097382.3 | -0.0089081 | 1 |
| ZNF677     | 0.0075562  | 1 |
| THEM6      | -0.0037447 | 1 |
| DCAF5      | 0.0040028  | 1 |
| GATB       | 0.017089   | 1 |
| NME7       | 0.0248841  | 1 |
| SIK2       | 0.0066172  | 1 |
| BIRC6      | -0.0543054 | 1 |
| ATP6V0E2   | 0.0354621  | 1 |
| ZNF571     | -0.003846  | 1 |
| MMRN1      | 0.1049511  | 1 |
| EIF4E3     | -0.0674085 | 1 |

|            |            |   |
|------------|------------|---|
| CHCHD7     | -0.0240833 | 1 |
| LYRM7      | -0.0446092 | 1 |
| TMEM102    | 0.0139177  | 1 |
| SLC24A1    | -0.0180218 | 1 |
| IQCB1      | -0.0067986 | 1 |
| CRIP1      | -0.0533984 | 1 |
| RRBP1      | 0.1435812  | 1 |
| KIFC3      | -0.0512508 | 1 |
| CDV3       | 0.1130966  | 1 |
| AGPAT3     | 0.0158647  | 1 |
| TRIM37     | -0.0385168 | 1 |
| LATS1      | -0.046286  | 1 |
| KNOP1      | 0.0112181  | 1 |
| TMEM161A   | 0.0416857  | 1 |
| EPHA1-AS1  | 0.0200793  | 1 |
| SLFN12L    | -0.0403801 | 1 |
| AC021097.1 | -0.018759  | 1 |
| CFDP1      | 0.0421671  | 1 |
| NUDT16     | -0.0086164 | 1 |
| LRFN4      | -0.0100238 | 1 |
| SMIM6      | -0.006892  | 1 |
| PNO1       | -0.0322938 | 1 |
| SYNRG      | -0.0436244 | 1 |
| METTL9     | -0.0122286 | 1 |
| SAP25      | -0.0100089 | 1 |
| AC008443.1 | -0.0147587 | 1 |
| PPFIA1     | -0.0526928 | 1 |
| TUBGCP6    | 0.0063833  | 1 |
| LINC02615  | 0.0002223  | 1 |
| MOCS2      | -0.0179246 | 1 |
| BMI1       | -0.0718534 | 1 |
| CALML4     | 0.0095417  | 1 |
| PCTP       | -0.0202155 | 1 |
| SLC25A29   | 0.0043268  | 1 |
| PIP5K1B    | -0.0254093 | 1 |
| HOXA4      | -0.0278292 | 1 |
| CELF6      | -0.0089119 | 1 |
| CA2        | 0.0307819  | 1 |
| KIAA0586   | 0.0030475  | 1 |
| TRNT1      | 0.0014525  | 1 |
| FBXL6      | 0.0335663  | 1 |
| DUSP18     | -0.0329173 | 1 |
| PI4K2B     | -0.0068827 | 1 |
| HCK        | 0.0178355  | 1 |
| CHD4       | 0.0682409  | 1 |
| EID2B      | 0.0254479  | 1 |
| ATP6V1C1   | 0.0363856  | 1 |
| HLA-DRB1   | 0.0520821  | 1 |
| RANBP2     | -0.0148347 | 1 |
| RPS7       | 0.0797611  | 1 |

|            |            |   |
|------------|------------|---|
| SYNE1      | 0.0218215  | 1 |
| ZFC3H1     | -0.0276232 | 1 |
| KLHL42     | 0.0216075  | 1 |
| EFCAB14    | -0.0485411 | 1 |
| ABO        | -0.0562267 | 1 |
| HIBADH     | -0.0303219 | 1 |
| AGBL5      | -0.0025522 | 1 |
| CLEC12A    | 0.0467427  | 1 |
| CEP89      | -0.0319571 | 1 |
| DST        | -0.0737803 | 1 |
| UBE3D      | -0.0189936 | 1 |
| RANGAP1    | -0.0073935 | 1 |
| MCTS1      | -0.0113332 | 1 |
| AC093627.5 | -0.0141527 | 1 |
| CCDC92     | -0.0060672 | 1 |
| KIF11      | 0.0327935  | 1 |
| MAN1A1     | 0.1083028  | 1 |
| TTI2       | -0.0060598 | 1 |
| TVP23C     | -0.0173252 | 1 |
| CYB561     | 0.0187916  | 1 |
| CDYL       | -0.0789681 | 1 |
| JADE2      | -0.031698  | 1 |
| CRNDE      | -0.0702609 | 1 |
| SFPQ       | 0.1073898  | 1 |
| TENT4A     | -0.0148266 | 1 |
| C19orf12   | 0.0012314  | 1 |
| UBE3A      | -0.0400777 | 1 |
| ZNF672     | 0.0178274  | 1 |
| ELK1       | -0.0029322 | 1 |
| WDR53      | 0.0137137  | 1 |
| TPRN       | -0.0094409 | 1 |
| ATP5MC3    | 0.1250578  | 1 |
| METTL14    | 0.0040465  | 1 |
| ELMO2      | -0.0181597 | 1 |
| BAG2       | 0.0082117  | 1 |
| RNF121     | -0.0214413 | 1 |
| ZNF783     | -0.017633  | 1 |
| SRP72      | 0.0751354  | 1 |
| PNRC2      | 0.0541384  | 1 |
| OAS1       | 0.0797357  | 1 |
| AC245884.8 | -0.013953  | 1 |
| HLA-F-AS1  | -0.0097174 | 1 |
| RINT1      | -0.0151064 | 1 |
| PROSER2    | -0.0032224 | 1 |
| CEACAM4    | 0.0352957  | 1 |
| PNPLA6     | 0.0394705  | 1 |
| HPDL       | 0.0233003  | 1 |
| ZMAT1      | 0.0236038  | 1 |
| INIP       | -0.0085613 | 1 |
| LINC02328  | 0.0208727  | 1 |

|            |            |   |
|------------|------------|---|
| FAM214B    | -0.0189079 | 1 |
| PRKACB     | -0.1215605 | 1 |
| AEBP1      | 0.0008194  | 1 |
| ANKRD52    | -0.0221854 | 1 |
| PCBD2      | -0.0301164 | 1 |
| C8orf37    | -0.0311553 | 1 |
| FBXO8      | -0.0022592 | 1 |
| MECR       | 0.0182093  | 1 |
| GATM       | 0.0028246  | 1 |
| FMR1       | -0.0387436 | 1 |
| TCEANC2    | -0.0163553 | 1 |
| FASN       | -0.0035182 | 1 |
| MIR29B2CH  | 0.0590174  | 1 |
| MIA3       | -0.0680919 | 1 |
| MAPK3      | -0.0179297 | 1 |
| SMC3       | 0.0838808  | 1 |
| NCOA5      | -0.0194939 | 1 |
| ZFX        | -0.0462962 | 1 |
| AL133410.1 | -0.0190694 | 1 |
| PPP1R12C   | -0.0149504 | 1 |
| CAAP1      | 0.0205817  | 1 |
| NDUFS4     | -0.069498  | 1 |
| AL121603.2 | 0.0098886  | 1 |
| TMOD2      | 0.0265993  | 1 |
| IQCE       | -0.0208681 | 1 |
| ARNTL2     | 0.0118908  | 1 |
| FGFBP3     | -0.0175035 | 1 |
| NDUFA2     | 0.0149219  | 1 |
| MAGT1      | 0.0050193  | 1 |
| MINDY3     | 0.0013944  | 1 |
| NUP35      | -0.011734  | 1 |
| ABHD11     | -0.0061997 | 1 |
| USP40      | -0.0037428 | 1 |
| GAB2       | -0.014122  | 1 |
| EMC2       | -0.0015313 | 1 |
| XRCC1      | 0.000577   | 1 |
| HTR1F      | 0.0010049  | 1 |
| SF3B1      | 0.065318   | 1 |
| CCDC93     | 0.0182816  | 1 |
| GCFC2      | -0.0100047 | 1 |
| XXYLT1     | -0.0523199 | 1 |
| C3AR1      | 0.0743603  | 1 |
| IL6R       | -0.0078402 | 1 |
| BX890604.2 | -0.0535889 | 1 |
| PRDM16     | -0.0614338 | 1 |
| NUFIP2     | -0.0720827 | 1 |
| UQCRC2     | 0.0414062  | 1 |
| RXRB       | 0.0102883  | 1 |
| NDUFV3     | -0.0377652 | 1 |
| LINC01572  | -0.0175092 | 1 |

|            |            |   |
|------------|------------|---|
| C2CD5      | 0.0047528  | 1 |
| PSAP       | -0.1010661 | 1 |
| EXOC1      | -0.0248859 | 1 |
| DHX38      | -0.0051335 | 1 |
| PSMG3-AS1  | -0.0050442 | 1 |
| DENND3     | -0.0210631 | 1 |
| UBN1       | -0.0417861 | 1 |
| CYTH1      | -0.0053021 | 1 |
| HDAC4-AS1  | -0.0088125 | 1 |
| POFUT1     | -0.0309596 | 1 |
| KLHL15     | 0.0023803  | 1 |
| PRKD2      | 0.0225565  | 1 |
| PDE4D      | 0.0151003  | 1 |
| ATP6V1D    | -0.0063346 | 1 |
| ZNF182     | -0.0168167 | 1 |
| RRP12      | 0.0405819  | 1 |
| SPCS1      | -0.007568  | 1 |
| SMARCD1    | -0.0238779 | 1 |
| CDKN2AIP   | 0.0449801  | 1 |
| ZKSCAN2    | -0.0027199 | 1 |
| WDHD1      | 0.0346939  | 1 |
| MMP25-AS1  | 0.0155609  | 1 |
| ALKBH6     | -0.0127184 | 1 |
| MRPS17     | 0.0184007  | 1 |
| HIST2H2BE  | -0.0061583 | 1 |
| MMS22L     | -0.0360919 | 1 |
| NAA80      | -0.0162171 | 1 |
| AC093690.1 | -0.036511  | 1 |
| ZNF684     | -0.0059343 | 1 |
| GFM2       | -0.0049117 | 1 |
| BDP1       | 0.0633857  | 1 |
| KLHL8      | -0.0076223 | 1 |
| MCAT       | 0.0329433  | 1 |
| CRELD1     | 0.0203741  | 1 |
| FUT11      | -0.0103399 | 1 |
| DIDO1      | -0.0170339 | 1 |
| ZNF770     | -0.0527454 | 1 |
| UBA6       | -0.0186968 | 1 |
| SNUPN      | -0.0439399 | 1 |
| PSKH1      | 0.0074088  | 1 |
| PDE6G      | 0.0236598  | 1 |
| ATP10D     | -0.0643411 | 1 |
| LINC02175  | 0.0034242  | 1 |
| ADCK2      | 0.02297    | 1 |
| APEX2      | -0.0125308 | 1 |
| TUT4       | -0.1126815 | 1 |
| RPF2       | -0.0133854 | 1 |
| PCGF6      | -0.0112827 | 1 |
| AKAP8      | 0.010144   | 1 |
| GTF2A1     | -0.0204742 | 1 |



|            |            |   |
|------------|------------|---|
| NSDHL      | 0.0072382  | 1 |
| POLR3E     | -0.0124137 | 1 |
| ATPAF1     | 0.0525213  | 1 |
| BTBD10     | 0.0184395  | 1 |
| SPATA5     | -0.0109268 | 1 |
| OGFOD1     | -0.0036587 | 1 |
| ZNF846     | -0.0245778 | 1 |
| GM2A       | -0.0590726 | 1 |
| SEPHS1     | 0.0079204  | 1 |
| GADD45GIP  | 0.1020457  | 1 |
| LAMTOR1    | 0.0966265  | 1 |
| ARMC2      | -0.0105179 | 1 |
| CCNQ       | 0.015513   | 1 |
| CCDC84     | 0.0015     | 1 |
| ABCF3      | 0.0092691  | 1 |
| FNDC3B     | -0.113808  | 1 |
| CYB5D2     | 0.0083868  | 1 |
| LINC01678  | -0.0419153 | 1 |
| PABPC1L    | 0.0121327  | 1 |
| SKA2       | 0.0043378  | 1 |
| CCDC18     | -0.0135699 | 1 |
| TBCE.1     | -0.0342754 | 1 |
| SEC31B     | -0.0171253 | 1 |
| NFIC       | -0.0133522 | 1 |
| ACAD11     | -0.0034475 | 1 |
| CCDC127    | 0.0081843  | 1 |
| AC099343.3 | 0.0386013  | 1 |
| HPS5       | -0.0108724 | 1 |
| GTPBP1     | -0.0123746 | 1 |
| DEDD       | -0.0056266 | 1 |
| CMTM3      | 0.0852497  | 1 |
| LRWD1      | -0.0162191 | 1 |
| USB1       | -0.0176102 | 1 |
| RMI1       | -0.0219738 | 1 |
| NRAV       | -0.0108884 | 1 |
| MRPL20-AS  | 0.0080362  | 1 |
| KCTD21-AS  | -0.0363382 | 1 |
| NAXD       | -0.0083166 | 1 |
| RFT1       | 0.0132212  | 1 |
| HIST1H2AH  | -0.0154805 | 1 |
| NFKBIB     | 0.0115163  | 1 |
| PRKAB1     | -0.0233278 | 1 |
| INTU       | -0.0191775 | 1 |
| SELENOI    | -0.0148343 | 1 |
| DPAGT1     | 0.0100244  | 1 |
| ZNF665     | -0.0137805 | 1 |
| CERNA2     | -0.0199126 | 1 |
| ZNF583     | -0.0110776 | 1 |
| TESK1      | 0.002886   | 1 |
| ASAP2      | 0.0286633  | 1 |

|            |            |   |
|------------|------------|---|
| COX18      | -0.0184409 | 1 |
| PAQR6      | 0.0347949  | 1 |
| AC093157.1 | 0.0026932  | 1 |
| MACF1      | -0.0044506 | 1 |
| U2AF1      | -0.0217198 | 1 |
| SH3BGRL3   | 0.0943379  | 1 |
| RPL6       | 0.0869452  | 1 |
| C7orf50    | 0.0038249  | 1 |
| CHM        | 0.010537   | 1 |
| RAVER2     | 0.0379797  | 1 |
| COX17      | 0.0049212  | 1 |
| PASK       | -0.0144723 | 1 |
| SMPD1      | -0.0176477 | 1 |
| SLC35B2    | 0.0045783  | 1 |
| TNRC6B     | -0.0756587 | 1 |
| GOLGA8B    | -0.0347283 | 1 |
| NCOA2      | -0.0220607 | 1 |
| ARHGEF7    | -0.0053874 | 1 |
| KLRG1      | 0.0483041  | 1 |
| GAB1       | 0.0198447  | 1 |
| RPL17      | 0.0973682  | 1 |
| AP002495.1 | 0.0105071  | 1 |
| CLMN       | 0.0300422  | 1 |
| JAK1       | -0.061037  | 1 |
| ZNF568     | -0.0020254 | 1 |
| MAD2L1BP   | -0.0052434 | 1 |
| NUDT7      | 0.0064053  | 1 |
| OGFOD2     | 0.0247617  | 1 |
| LINC02802  | -0.0308416 | 1 |
| ZNF662     | 0.0211654  | 1 |
| SLMAP      | -0.0152725 | 1 |
| SPTLC2     | -0.049477  | 1 |
| AC010969.2 | 0.006749   | 1 |
| STIMATE    | -0.0196401 | 1 |
| BDNF-AS    | 0.0141414  | 1 |
| AL645568.1 | -0.0038616 | 1 |
| ARHGEF6    | -0.0193156 | 1 |
| UEVLD      | -0.0018916 | 1 |
| CMTM7      | 0.082373   | 1 |
| IL11RA     | -0.025291  | 1 |
| ZNF432     | -0.0313064 | 1 |
| AC108463.3 | 0.0291275  | 1 |
| PAFAH1B1   | 0.0042218  | 1 |
| ALDH2      | -0.0539704 | 1 |
| ATRAID     | 0.0476164  | 1 |
| MARVELD1   | 0.0235316  | 1 |
| LSS        | -0.0032961 | 1 |
| DHX35      | -0.0098702 | 1 |
| JMY        | -0.0148328 | 1 |
| TAF5       | -0.0011192 | 1 |

|            |            |   |
|------------|------------|---|
| ARMC9      | -0.0433432 | 1 |
| HSPBP1     | 0.0171938  | 1 |
| TMEM9B-AS  | -0.0036268 | 1 |
| HOXA9      | -0.1654532 | 1 |
| YJU2       | -0.0188116 | 1 |
| LRRC8B     | 0.0260039  | 1 |
| ZDHHC14    | 0.0180619  | 1 |
| RBKS       | -0.0359957 | 1 |
| CENPK      | 0.0516391  | 1 |
| SLC27A2    | 0.0471675  | 1 |
| DDX52      | -0.0461148 | 1 |
| SCOC       | -0.0040907 | 1 |
| ARFGEF1    | -0.0402374 | 1 |
| LINC02848  | -0.0172597 | 1 |
| MON1A      | 0.0098239  | 1 |
| MAP3K7     | -0.0383463 | 1 |
| ZFAND2A    | -0.0117041 | 1 |
| ZNF599     | -0.017226  | 1 |
| ZNF81      | -0.0048838 | 1 |
| MYCNOS     | 0.0152909  | 1 |
| POLA1      | -0.0016486 | 1 |
| PGBD4      | -0.0130252 | 1 |
| CACUL1     | -0.0443796 | 1 |
| SP140L     | -0.0130085 | 1 |
| ZNF418     | -0.0047814 | 1 |
| AC026979.2 | 0.0472164  | 1 |
| NIF3L1     | -0.0165414 | 1 |
| PKD1       | -0.0337184 | 1 |
| SF1        | 0.0797626  | 1 |
| TLK1       | 0.0166241  | 1 |
| FKBP14     | -0.0283545 | 1 |
| HSD17B8    | 0.0420024  | 1 |
| AC008014.1 | 0.0414902  | 1 |
| LINC00630  | -0.0038686 | 1 |
| WDR7       | -0.0232951 | 1 |
| APC        | 0.0054707  | 1 |
| ILRUN      | -0.0299399 | 1 |
| POLH       | -0.0417557 | 1 |
| TUBG1      | 0.0309895  | 1 |
| ZNF75D     | -0.0298133 | 1 |
| PSMB1      | 0.1012796  | 1 |
| EXOG       | 0.0070436  | 1 |
| PI4KA      | -0.063109  | 1 |
| TOMM7      | -0.1005197 | 1 |
| HERPUD1    | -0.0035376 | 1 |
| TRMT10A    | -0.0122134 | 1 |
| MIR4435-2H | -0.0021986 | 1 |
| HMBS       | 0.0170416  | 1 |
| ZNF317     | -0.0013702 | 1 |
| GEMIN4     | -0.0148116 | 1 |

|            |            |   |
|------------|------------|---|
| AC090152.1 | 0.0668098  | 1 |
| CD46       | -0.1294357 | 1 |
| TENT4B     | 0.011988   | 1 |
| PHF19      | 0.0514269  | 1 |
| RMND5B     | -0.0112792 | 1 |
| NOL6       | -0.0432303 | 1 |
| AC132872.1 | 0.0021922  | 1 |
| ZNF766     | -0.0258252 | 1 |
| TBC1D19    | -0.0055106 | 1 |
| SLC11A2    | -0.0411845 | 1 |
| DDX21      | 0.1137431  | 1 |
| EIF2B3     | -0.0043148 | 1 |
| ANKRD44    | -0.0037178 | 1 |
| ZNF34      | -0.0049438 | 1 |
| CSPP1      | -0.0014773 | 1 |
| ZNF554     | -0.00114   | 1 |
| SLC31A1    | -0.0045309 | 1 |
| ZSCAN16    | -0.0099062 | 1 |
| ZYX        | 0.0186561  | 1 |
| OPN3       | 0.0032736  | 1 |
| PHACTR1    | -0.0436576 | 1 |
| MSTO1      | 0.0140305  | 1 |
| KLHL28     | -0.0178101 | 1 |
| TUBGCP2    | -0.0095279 | 1 |
| PLAGL1     | 0.0219091  | 1 |
| CREB3L4    | 0.016576   | 1 |
| URB1-AS1   | -0.0074854 | 1 |
| KPNA1      | -0.0250128 | 1 |
| AC104596.1 | -0.0213211 | 1 |
| LSM5       | 0.0089973  | 1 |
| SLC39A9    | -0.0557778 | 1 |
| GEMIN6     | 0.0156498  | 1 |
| SLC39A7    | -0.0047812 | 1 |
| NIN        | 0.0259599  | 1 |
| NAT1       | -0.0023587 | 1 |
| RMI2       | 0.0347717  | 1 |
| LINC01238  | -0.0048871 | 1 |
| ZFYVE19    | 0.0217444  | 1 |
| RPL27A     | 0.077785   | 1 |
| RNF170     | 0.0047214  | 1 |
| CSDE1      | -0.0282061 | 1 |
| EIF3H      | -0.0667647 | 1 |
| EPC2       | -0.050294  | 1 |
| MRPL53     | -0.0442289 | 1 |
| HELZ       | -0.0138817 | 1 |
| PNRC1      | -0.1167516 | 1 |
| MRGBP      | -0.0178244 | 1 |
| ARL13B     | 0.0084317  | 1 |
| GPATCH11   | -0.0533041 | 1 |
| RNF149     | -0.035268  | 1 |

|            |            |   |
|------------|------------|---|
| LIME1      | 0.0832115  | 1 |
| GRK4       | 0.0226457  | 1 |
| F2R        | 0.0028873  | 1 |
| ACOT4      | 0.0135645  | 1 |
| RIOX2      | 0.0149396  | 1 |
| RNF169     | 0.0308054  | 1 |
| ARID4A     | -0.0457897 | 1 |
| AK3        | 0.0147517  | 1 |
| LYRM9      | 0.0008817  | 1 |
| TCTN2      | -0.0180592 | 1 |
| HHAT       | -0.0131238 | 1 |
| ZNF200     | -0.0179023 | 1 |
| SEC11A     | -0.0095473 | 1 |
| ZNF75A     | -0.0212592 | 1 |
| NIPAL3     | 0.0194582  | 1 |
| CIP2A      | -0.0110146 | 1 |
| SNHG11     | 0.0173278  | 1 |
| LRRC69     | -0.0284123 | 1 |
| AC133550.3 | -0.0108336 | 1 |
| FAF2       | 0.0284415  | 1 |
| SEPSECS    | -0.0148101 | 1 |
| MLH3       | 0.0366582  | 1 |
| TRAM1      | -0.0411474 | 1 |
| PDZD8      | -0.0852471 | 1 |
| ABCB8      | -0.0010535 | 1 |
| NBPF1      | -0.0183172 | 1 |
| IPO11      | 0.0208471  | 1 |
| RAB31      | 0.103954   | 1 |
| WARS2-AS1  | -0.0153514 | 1 |
| FXR1       | -0.1561977 | 1 |
| DUSP28     | -0.0173581 | 1 |
| ALDH1B1    | 0.0296855  | 1 |
| DNAJC18    | 0.0335831  | 1 |
| DCAF1      | -0.0101993 | 1 |
| L3MBTL3    | -0.0117129 | 1 |
| ABCF1      | -0.0083544 | 1 |
| RPSA       | 0.0929917  | 1 |
| DET1       | -0.0093776 | 1 |
| KIAA0513   | -0.0187246 | 1 |
| DTWD1      | -0.0311358 | 1 |
| ANKS3      | -0.0037251 | 1 |
| CYB5RL     | 4.252E-05  | 1 |
| BDH1       | -0.0113683 | 1 |
| TARBP2     | -0.0250908 | 1 |
| ATP5MF     | 0.0573837  | 1 |
| ANAPC1     | -0.0190207 | 1 |
| ZNF473     | -0.0111945 | 1 |
| MBOAT1     | -0.0068867 | 1 |
| CEP68      | 0.0337986  | 1 |
| RGS12      | -0.0452097 | 1 |

|            |            |   |
|------------|------------|---|
| ATF6       | 0.0312632  | 1 |
| ATF7IP2    | -0.0428336 | 1 |
| RPGR       | 0.0215904  | 1 |
| ANGEL1     | -0.0037314 | 1 |
| AC007038.1 | -0.0192692 | 1 |
| MINDY2     | 0.0291492  | 1 |
| NINJ2      | -0.035963  | 1 |
| C19orf44   | -0.0061174 | 1 |
| ZW10       | 0.0175634  | 1 |
| HIST1H2AE  | -0.0127665 | 1 |
| ARMCX5     | 0.0076502  | 1 |
| WDR4       | 0.0353621  | 1 |
| GBF1       | -0.0121093 | 1 |
| MYO1B      | 0.0675235  | 1 |
| AP000845.1 | 0.0332805  | 1 |
| RAC2       | 0.1128905  | 1 |
| LAMTOR5-A  | 0.0215955  | 1 |
| LINC02693  | -0.0159238 | 1 |
| PDE4DIP    | -0.0707912 | 1 |
| PELO       | 0.030279   | 1 |
| TMEM192    | -0.0499961 | 1 |
| AC109460.2 | -0.0219556 | 1 |
| C15orf41   | 0.0027073  | 1 |
| LINC00894  | -0.0344095 | 1 |
| AC005076.1 | -0.0347522 | 1 |
| VCPKMT     | 0.0128343  | 1 |
| SMAP2      | 0.0609642  | 1 |
| TCOF1      | 0.0348119  | 1 |
| COX4I1     | 0.091987   | 1 |
| PGBD1      | -0.0182856 | 1 |
| COX7A2     | 0.0455559  | 1 |
| METTL1     | -0.0130608 | 1 |
| ETS2       | 0.1720184  | 1 |
| ZC3H14     | -0.0118947 | 1 |
| GTPBP8     | 0.0361708  | 1 |
| KAT2B      | 0.0094976  | 1 |
| INF2       | 0.0235288  | 1 |
| OAS3       | 0.0444285  | 1 |
| ZNF10      | 0.0028087  | 1 |
| ZDHHC18    | 0.0165425  | 1 |
| TAF13      | -0.0081576 | 1 |
| RPGRIP1L   | -0.0062181 | 1 |
| EIF3J      | -0.0566135 | 1 |
| AC090517.5 | 0.0041641  | 1 |
| LRP10      | 0.0672442  | 1 |
| SYNGAP1    | 0.0184348  | 1 |
| PPIA       | 0.0995271  | 1 |
| DDX23      | -0.0204981 | 1 |
| ZNF37A     | 0.0255009  | 1 |
| ATF5       | -0.02912   | 1 |

|            |            |   |
|------------|------------|---|
| ACSF2      | 0.0012214  | 1 |
| TLR6       | 0.0279386  | 1 |
| PPT2       | 0.016418   | 1 |
| RBM38      | -0.005743  | 1 |
| ZNF773     | 0.0041128  | 1 |
| LINC00921  | -0.0046557 | 1 |
| SLX4       | -0.0214059 | 1 |
| HNRNPA0    | -0.117764  | 1 |
| HERC6      | 0.0120056  | 1 |
| TMCO1      | -0.0111353 | 1 |
| ZNF23      | -0.0078104 | 1 |
| EXOC7      | -0.0045227 | 1 |
| CCDC25     | 0.0445779  | 1 |
| HGF        | 0.0676022  | 1 |
| RESF1      | 0.0189049  | 1 |
| PAN2       | -0.0015893 | 1 |
| RCCD1      | 0.0096788  | 1 |
| CNOT4      | -0.02402   | 1 |
| CFAP70     | -0.0231402 | 1 |
| SCD5       | 0.041863   | 1 |
| TWNK       | 0.0073237  | 1 |
| TRIM4      | 0.0080843  | 1 |
| DICER1-AS1 | -0.0050945 | 1 |
| DOCK5      | -0.0466802 | 1 |
| DNTTIP2    | 0.0690906  | 1 |
| STEAP3     | 0.0113603  | 1 |
| GCH1       | -0.0028545 | 1 |
| HIST1H2AL  | -0.0343038 | 1 |
| CPNE8      | 0.026316   | 1 |
| CUL5       | -0.0327728 | 1 |
| COPS4      | 0.0301511  | 1 |
| SLC22A5    | 0.0100602  | 1 |
| PUDP       | 0.0136749  | 1 |
| HOXA10-AS  | -0.0740917 | 1 |
| EPS8       | 0.0623977  | 1 |
| SNHG3      | 0.0920895  | 1 |
| CPXM1      | 0.0291863  | 1 |
| HAGH       | 0.0064611  | 1 |
| AL365295.1 | 0.0571045  | 1 |
| ZC3H12A    | -0.0087713 | 1 |
| PAQR8      | 0.022157   | 1 |
| AC090559.1 | -0.1337074 | 1 |
| CWC15      | 0.0362324  | 1 |
| TMEM50A    | -0.0599853 | 1 |
| SPECC1L    | -0.0210664 | 1 |
| SARNP      | 0.0158892  | 1 |
| SHMT1      | -0.0016901 | 1 |
| FANCD2     | 0.0087065  | 1 |
| POLD1      | 0.0448699  | 1 |
| STK35      | 0.0126113  | 1 |

|            |            |   |
|------------|------------|---|
| SCYL1      | 0.0031179  | 1 |
| CCDC102A   | 0.0081198  | 1 |
| DVL2       | -0.0220236 | 1 |
| ZNF213-AS1 | -0.0318596 | 1 |
| LSM3       | 0.0502198  | 1 |
| MOV10      | 0.0201763  | 1 |
| GHDC       | -0.0084882 | 1 |
| SNX18      | -0.0455958 | 1 |
| RB1CC1     | -0.086614  | 1 |
| BEND5      | 0.0427223  | 1 |
| HEMK1      | -0.0164448 | 1 |
| MTMR12     | -0.0064735 | 1 |
| PCNX3      | -0.0185435 | 1 |
| AC073111.4 | -0.006002  | 1 |
| CYBA       | 0.1209375  | 1 |
| UBE4B      | -0.0387041 | 1 |
| AC027644.3 | -0.0081036 | 1 |
| ATP6V0B    | 0.0592115  | 1 |
| SLC25A36   | 0.0651763  | 1 |
| TMEM237    | -0.0096911 | 1 |
| ERCC4      | 0.0040727  | 1 |
| HNRNPR     | -0.063255  | 1 |
| PCSK7      | -0.0401711 | 1 |
| TM9SF3     | -0.0709688 | 1 |
| TMEM109    | 0.0327631  | 1 |
| ORAI3      | -0.0289828 | 1 |
| ROCK1      | 0.071399   | 1 |
| C12orf75   | 0.087224   | 1 |
| ZNF318     | -0.0146745 | 1 |
| LARS       | 0.0450703  | 1 |
| RRAGD      | 0.0007162  | 1 |
| RSRP1      | -0.0835691 | 1 |
| B3GNT5     | 0.0115813  | 1 |
| NAB1       | 0.0048623  | 1 |
| PSD4       | -0.0453607 | 1 |
| AC046134.2 | 0.0028405  | 1 |
| AC027097.2 | -0.0081768 | 1 |
| TARSL2     | -0.0484223 | 1 |
| ASB1       | -0.027957  | 1 |
| TCTEX1D1   | -0.0124443 | 1 |
| NDST1      | -0.0274846 | 1 |
| BCL7A      | 0.0916035  | 1 |
| AC008443.5 | -0.0037725 | 1 |
| DYNC1I2    | -0.0979845 | 1 |
| CHRAC1     | 0.0397493  | 1 |
| ZNF721     | 0.0132546  | 1 |
| FAM110A    | 0.0108002  | 1 |
| CCDC167    | 0.0547043  | 1 |
| RPUSD1     | 0.0255854  | 1 |
| RBSN       | 0.0045317  | 1 |



|            |            |   |
|------------|------------|---|
| RBMX       | -0.073286  | 1 |
| EXOSC9     | 0.000443   | 1 |
| GUCY1B1    | 0.0968074  | 1 |
| AC005674.2 | 0.000483   | 1 |
| MLST8      | 0.0469446  | 1 |
| NDUFB11    | 0.0601705  | 1 |
| AC010680.4 | 0.0019909  | 1 |
| LMLN       | -0.0151485 | 1 |
| AMT        | 0.0167774  | 1 |
| SLC16A5    | -0.0203201 | 1 |
| FBXL8      | -0.0047922 | 1 |
| LAT        | 0.0184142  | 1 |
| YY1AP1     | -0.0065023 | 1 |
| PDCD6      | -0.0787233 | 1 |
| PWWP2A     | 0.0148978  | 1 |
| NDUFA11    | 0.084649   | 1 |
| ZMYND8     | 0.0713262  | 1 |
| NAALADL2   | 0.0112995  | 1 |
| TMTC2      | -0.0056831 | 1 |
| ANXA4      | -0.0754601 | 1 |
| FNBP4      | -0.0466313 | 1 |
| MAX        | -0.1310603 | 1 |
| MROH7      | -0.0053344 | 1 |
| UTF1       | 0.0460104  | 1 |
| R3HDM1     | -0.0172564 | 1 |
| HSPA14     | -0.010874  | 1 |
| LSM8       | -0.0677818 | 1 |
| SNX14      | -0.0065945 | 1 |
| LIG4       | -0.0075063 | 1 |
| DHCR7      | -0.0619817 | 1 |
| MTMR4      | 0.0040416  | 1 |
| FUT8       | 0.0038977  | 1 |
| BBIP1      | -0.0120321 | 1 |
| AC068888.1 | -0.012889  | 1 |
| DOCK2      | -0.0407855 | 1 |
| ICA1L      | 0.0080259  | 1 |
| ZNF486     | -0.0124685 | 1 |
| PIP5K1C    | -0.0253821 | 1 |
| REC8       | -0.0265087 | 1 |
| ERCC2      | -0.0071142 | 1 |
| ADSS       | -0.025286  | 1 |
| AC110769.2 | 0.0031638  | 1 |
| USP5       | -0.014989  | 1 |
| AC009779.2 | 0.0111307  | 1 |
| TBC1D24    | -0.0310074 | 1 |
| DLC1       | -0.0152241 | 1 |
| TERF1      | -0.0057624 | 1 |
| CASP6      | 0.0146846  | 1 |
| ELOA-AS1   | 0.0157508  | 1 |
| IBA57      | 0.0455035  | 1 |

|            |            |   |
|------------|------------|---|
| CRADD      | 0.0123288  | 1 |
| ACY1       | 0.0108202  | 1 |
| PWP1       | 0.0089905  | 1 |
| ATRX       | -0.0925817 | 1 |
| CIDEB      | 0.0048128  | 1 |
| SCOC-AS1   | -0.0376918 | 1 |
| NLRP3      | 0.0532139  | 1 |
| TMEM175    | 0.0064383  | 1 |
| AL109615.4 | -0.0297412 | 1 |
| TSPAN31    | 0.0078011  | 1 |
| PRDM8      | 0.0188434  | 1 |
| CBX2       | 0.0160641  | 1 |
| CYP4V2     | -0.003732  | 1 |
| OCIAD1     | 0.0234776  | 1 |
| FAM185A    | -0.0098486 | 1 |
| HIST1H2BG  | -0.0331767 | 1 |
| EPC1       | -0.0969053 | 1 |
| CRTC1      | 0.0086656  | 1 |
| FGD3       | -0.0550496 | 1 |
| RNF217     | 0.0043171  | 1 |
| RANBP10    | 0.0089343  | 1 |
| HIVEP2     | 0.0322636  | 1 |
| ACBD3      | 0.0449751  | 1 |
| AC024560.4 | -0.0114159 | 1 |
| ARMT1      | 0.0087388  | 1 |
| DHTKD1     | 0.0919671  | 1 |
| AL135999.1 | 0.0017745  | 1 |
| SVBP       | -0.0450679 | 1 |
| IFT22      | -0.0145709 | 1 |
| AL355075.4 | 0.050535   | 1 |
| NCOR1      | -0.0915131 | 1 |
| SEPSECS-A  | -0.0208058 | 1 |
| NDUFA3     | -0.0901944 | 1 |
| NIFK       | 0.0170099  | 1 |
| TTC28      | -0.019232  | 1 |
| POU5F2     | -0.0119304 | 1 |
| MDH2       | 0.0812557  | 1 |
| NDEL1      | -0.0200951 | 1 |
| SOCS6      | 0.0060213  | 1 |
| YTHDC1     | -0.1070873 | 1 |
| COPS9      | -0.0627898 | 1 |
| AC009318.1 | 0.1315811  | 1 |
| SLC39A8    | -0.0004566 | 1 |
| LXN        | -0.0320611 | 1 |
| RHOBTB2    | -0.0024733 | 1 |
| CRYBG3     | 0.1083659  | 1 |
| ZNF786     | -0.0191805 | 1 |
| TMEM263    | 0.0089583  | 1 |
| NUP214     | 0.0082491  | 1 |
| IL10RB-DT  | -0.0279011 | 1 |

|            |            |   |
|------------|------------|---|
| CDC14A     | 0.0333728  | 1 |
| NUDT3      | -0.03848   | 1 |
| AC103703.1 | -0.0177381 | 1 |
| RAB3IP     | -0.0357027 | 1 |
| NCAPH2     | 0.0040938  | 1 |
| DEPDC7     | -0.0069931 | 1 |
| SRSF2      | -0.0105918 | 1 |
| WVOX       | 4.322E-05  | 1 |
| MT1F       | 0.0440294  | 1 |
| GDF11      | 0.0507465  | 1 |
| OBSCN      | 0.0382921  | 1 |
| PGBD2      | 0.0092217  | 1 |
| ARHGAP10   | -0.010892  | 1 |
| CCT5       | 0.0885141  | 1 |
| UMODL1-AS  | 0.004422   | 1 |
| VGLL4      | -0.0038519 | 1 |
| DHRS11     | -0.0126437 | 1 |
| MOB3C      | 0.0056598  | 1 |
| PTS        | 0.0039646  | 1 |
| SHLD3      | 0.0037443  | 1 |
| TFR2       | 0.0003756  | 1 |
| SEPTIN7    | 0.0071532  | 1 |
| HACD1      | -0.0279093 | 1 |
| EIF4G2     | -0.1279401 | 1 |
| AL136038.5 | -0.0074366 | 1 |
| DFFA       | -0.0021885 | 1 |
| SLC35A2    | 0.0176249  | 1 |
| PNISR      | -0.0630218 | 1 |
| PACS2      | -0.0096262 | 1 |
| ZNF792     | -0.0218708 | 1 |
| WBP4       | 0.0523188  | 1 |
| ERH        | 0.0175499  | 1 |
| AC135050.6 | -0.0253049 | 1 |
| ATG4D      | 0.0006497  | 1 |
| NUB1       | -0.0400169 | 1 |
| SUCO       | -0.0619146 | 1 |
| CLINT1     | -0.0531549 | 1 |
| RAB8B      | 0.0295481  | 1 |
| PRKAR2A    | -0.0398292 | 1 |
| ZNF799     | -0.0134128 | 1 |
| RPS6KB1    | -0.020786  | 1 |
| GFOD1      | 0.0429454  | 1 |
| ENSA       | 0.0490401  | 1 |
| SAMD8      | 0.013302   | 1 |
| VPS41      | -0.010385  | 1 |
| AP001816.1 | 0.0107395  | 1 |
| TMEM219    | 0.0287546  | 1 |
| LINC01578  | -0.1142055 | 1 |
| AC011447.3 | -0.0252801 | 1 |
| NSD3       | -0.0457828 | 1 |

|            |            |   |
|------------|------------|---|
| CCDC102B   | -0.0319451 | 1 |
| CD53       | 0.0333625  | 1 |
| LINC00342  | -0.0811969 | 1 |
| CEP63      | -0.0525354 | 1 |
| APTR       | 0.0029807  | 1 |
| AC021054.1 | -0.0175658 | 1 |
| CAPS       | 0.0009962  | 1 |
| PSMA4      | -0.0118396 | 1 |
| ZNF354A    | -0.0186838 | 1 |
| CAMSAP1    | -0.0244728 | 1 |
| AC093827.4 | 0.0265962  | 1 |
| RAP2A      | -0.0211761 | 1 |
| SPCS2      | 0.0354409  | 1 |
| GART       | -0.0129122 | 1 |
| TNKS2      | -0.0301393 | 1 |
| EEF2KMT    | 0.0004447  | 1 |
| SENP6      | -0.0018748 | 1 |
| VIPAS39    | -0.0106066 | 1 |
| FOXP1      | -0.0779891 | 1 |
| BPNT1      | -0.0004048 | 1 |
| AP003307.1 | -0.0001123 | 1 |
| SRPK2      | -0.0193971 | 1 |
| RILPL2     | -0.0609736 | 1 |
| KRTCAP2    | 0.1037125  | 1 |
| SGTB       | -0.0186538 | 1 |
| PEX14      | -0.0013049 | 1 |
| TNNI2      | 0.065549   | 1 |
| TOP3A      | 0.0024589  | 1 |
| FAM117B    | -0.0135074 | 1 |
| C19orf81   | -0.0282337 | 1 |
| AL021155.5 | 0.0362486  | 1 |
| STIM1      | 0.0236585  | 1 |
| TBCK       | -0.0407078 | 1 |
| TWSG1      | 0.0464533  | 1 |
| IER5       | -0.0636753 | 1 |
| SYVN1      | -0.0375496 | 1 |
| LAMTOR5    | 0.0851003  | 1 |
| PSMD8      | 0.0821957  | 1 |
| HIST1H1D   | 0.1882721  | 1 |
| MAP2K2     | 0.1242864  | 1 |
| FADD       | 0.0064923  | 1 |
| Z99127.4   | 0.0478608  | 1 |
| TIMM13     | 0.1115164  | 1 |
| SMIM30     | -0.0130994 | 1 |
| MIOS       | -0.0183279 | 1 |
| PARPBP     | 0.0215057  | 1 |
| NDUFA12    | 0.0342121  | 1 |
| RNF130     | -0.1431726 | 1 |
| UAP1L1     | -0.0079607 | 1 |
| SF3B6      | 0.1433087  | 1 |

|            |            |   |
|------------|------------|---|
| PRDM2      | -0.0456003 | 1 |
| DNAJC4     | 6.558E-05  | 1 |
| C8orf76    | -0.0028853 | 1 |
| AMBRA1     | 0.0038669  | 1 |
| NEK8       | 0.00926    | 1 |
| SMPD4      | -0.041961  | 1 |
| FAIM       | -0.0105902 | 1 |
| ELF2       | -0.0378964 | 1 |
| HEATR5A    | -0.0276693 | 1 |
| MPP1       | 0.0337239  | 1 |
| AL161421.1 | -0.0020172 | 1 |
| SPEN       | -0.0849622 | 1 |
| SIAE       | -0.0077953 | 1 |
| ZNF319     | -0.0072675 | 1 |
| ACD        | 0.0049745  | 1 |
| CACNA1C-A  | 0.0157269  | 1 |
| USP28      | -0.0313585 | 1 |
| TCF7L2     | 0.0507731  | 1 |
| PRELID2    | 0.0454538  | 1 |
| PREPL      | -0.0378164 | 1 |
| CREBRF     | -0.0309869 | 1 |
| PLEKHO2    | -0.0034367 | 1 |
| POLR3F     | 0.0028719  | 1 |
| JMJD7      | 0.0041619  | 1 |
| LSM11      | -0.0079637 | 1 |
| SMIM1      | 0.0177773  | 1 |
| CRAT       | -0.0104245 | 1 |
| LACTB2     | 0.0288426  | 1 |
| IGSF8      | 0.0004093  | 1 |
| PCYT1A     | -0.0127814 | 1 |
| NIPBL-DT   | -0.0016546 | 1 |
| MED25      | 0.0128408  | 1 |
| ARHGAP32   | 0.0191978  | 1 |
| VWA8       | 0.0021014  | 1 |
| SCHIP1     | -0.0088053 | 1 |
| PRCP       | -0.0256424 | 1 |
| ZNF682     | 0.0087743  | 1 |
| EIF2AK2    | 0.0411381  | 1 |
| SEC11C     | -0.0008417 | 1 |
| ARAP2      | 0.0085483  | 1 |
| POU2F1     | -0.0378794 | 1 |
| EPGN       | -0.0259501 | 1 |
| RUBCN      | -0.0428018 | 1 |
| RAB44      | -0.0482304 | 1 |
| PGLS       | 0.0286551  | 1 |
| HIST1H2AM  | -0.0377717 | 1 |
| SMYD2      | -0.0087123 | 1 |
| SPDL1      | -0.025986  | 1 |
| PLD1       | -0.0908609 | 1 |
| GRAP       | 0.0241119  | 1 |

|            |            |   |
|------------|------------|---|
| UPP1       | -0.0206544 | 1 |
| ISCU       | 0.1245249  | 1 |
| TSPOAP1-A  | -0.0166343 | 1 |
| KLHL21     | -0.0165733 | 1 |
| SNRPF      | 0.0253174  | 1 |
| AL683813.1 | -0.0096981 | 1 |
| CFAP36     | -0.1035737 | 1 |
| LINC00467  | 0.0297903  | 1 |
| LMF1       | -0.0213689 | 1 |
| GOLPH3L    | -0.0055918 | 1 |
| TXNDC5     | -0.1531021 | 1 |
| LINC00899  | 0.0310097  | 1 |
| SCYL2      | -0.0409215 | 1 |
| MAP4K1     | 0.0099963  | 1 |
| HIVEP3     | 0.0417572  | 1 |
| PSMD4      | -0.0071875 | 1 |
| AC024560.5 | 0.0035545  | 1 |
| IFT74      | 0.0144697  | 1 |
| MAEL       | 0.0142427  | 1 |
| TMEM254    | 0.0192672  | 1 |
| IL12RB1    | -0.0264797 | 1 |
| RNF208     | 0.0095161  | 1 |
| PCCA       | 0.0121022  | 1 |
| NACC1      | 0.0013819  | 1 |
| SMURF1     | -0.0088574 | 1 |
| NADK       | -0.0118595 | 1 |
| AC026124.2 | -0.0068069 | 1 |
| BDH2       | -0.0456501 | 1 |
| XRCC2      | 0.0325008  | 1 |
| ZNF660     | -0.0336286 | 1 |
| ZFAT       | -0.0026992 | 1 |
| TRMT5      | 0.0200899  | 1 |
| AKAP17A    | -0.0109017 | 1 |
| RNF185     | -0.007945  | 1 |
| ADGRA2     | 0.0013481  | 1 |
| LINC01534  | -0.0030825 | 1 |
| CMC4       | -0.0038804 | 1 |
| SYTL2      | -0.0232742 | 1 |
| PPP2R1B    | 0.0194984  | 1 |
| AC009120.2 | 0.003319   | 1 |
| COX5A      | 0.1068734  | 1 |
| AC234772.2 | -0.0150812 | 1 |
| HSBP1      | 0.0427803  | 1 |
| C1orf54    | 0.0144058  | 1 |
| RNASEK     | -0.0987462 | 1 |
| TMEM14A    | 0.0468388  | 1 |
| CSNK2A1    | -0.0519734 | 1 |
| KDELRL1    | 0.0199176  | 1 |
| TTC37      | -0.0578735 | 1 |
| PSME1      | -0.1118443 | 1 |

|            |            |   |
|------------|------------|---|
| MICOS10    | 0.0536946  | 1 |
| BUB1B      | 0.0257896  | 1 |
| MTA3       | 0.0165036  | 1 |
| LIN9       | -0.0206135 | 1 |
| MPND       | 0.0217089  | 1 |
| LINC00653  | -0.0224489 | 1 |
| FAM162A    | 0.0348493  | 1 |
| AL392172.1 | -0.0091186 | 1 |
| ASL        | -0.0239976 | 1 |
| PCCA-DT    | 0.0086864  | 1 |
| FAM81B     | -0.0133735 | 1 |
| EXD2       | 0.0005855  | 1 |
| LINC01684  | 0.0435411  | 1 |
| ACADM      | -0.0137929 | 1 |
| TBCEL      | 0.0015231  | 1 |
| SPATA2     | -0.007459  | 1 |
| CHI3L1     | -0.0628718 | 1 |
| EGFL8      | -0.0091904 | 1 |
| CU638689.4 | -0.0008088 | 1 |
| METTL22    | -0.0308967 | 1 |
| ZBTB9      | -0.0076353 | 1 |
| SULT1C4    | 0.0355772  | 1 |
| HIST1H2BK  | -0.001434  | 1 |
| TMEM154    | 0.0234756  | 1 |
| TCFL5      | -0.0195324 | 1 |
| SMARCE1    | -0.044169  | 1 |
| BAHD1      | -0.0082062 | 1 |
| PXMP4      | -0.017073  | 1 |
| DUSP7      | -0.0008082 | 1 |
| WAKMAR2    | 0.0122134  | 1 |
| PROSER3    | 0.0061955  | 1 |
| SYT11      | 0.0044055  | 1 |
| CASP4      | -0.039783  | 1 |
| CERCAM     | -0.0069423 | 1 |
| CENPV      | 0.0191129  | 1 |
| DCP1A      | 0.0169546  | 1 |
| SLC2A11    | -0.0103922 | 1 |
| ADA        | -0.0023499 | 1 |
| RBL1       | -0.0013017 | 1 |
| MED15      | -0.0152849 | 1 |
| AC090204.1 | -0.0010188 | 1 |
| AKAP1      | 0.0101193  | 1 |
| TMEM14C    | 0.0285477  | 1 |
| AL662844.4 | 0.0102535  | 1 |
| DYSF       | 0.0310343  | 1 |
| CUL7       | -0.0071109 | 1 |
| OTUD3      | -0.0123241 | 1 |
| SLC2A3     | 0.0825897  | 1 |
| CSTF2      | 0.0137164  | 1 |
| EXOSC6     | -0.0609259 | 1 |

|            |            |   |
|------------|------------|---|
| RAC3       | 0.0456074  | 1 |
| CMTM6      | -0.0028946 | 1 |
| XRCC4      | -0.0076351 | 1 |
| AC009065.4 | -0.0129071 | 1 |
| EIF4B      | 0.0123405  | 1 |
| FAM200B    | 0.0080733  | 1 |
| ZNF616     | -0.038191  | 1 |
| SLC43A2    | 0.0139223  | 1 |
| NFIL3      | -0.0729279 | 1 |
| MRPL48     | -0.0010725 | 1 |
| MTIF3      | 0.0017757  | 1 |
| PAK2       | -0.109208  | 1 |
| DCAF4      | 0.0134461  | 1 |
| ASH1L-AS1  | 0.0189927  | 1 |
| AP002381.2 | -0.024866  | 1 |
| MBP        | 0.1198074  | 1 |
| SBF1       | 0.0086314  | 1 |
| QSOX2      | 0.0106216  | 1 |
| MTURN      | 0.0784745  | 1 |
| OGFRL1     | -0.0007048 | 1 |
| CTSF       | 0.0378865  | 1 |
| C6orf163   | -0.0204728 | 1 |
| MRPL42     | -0.0681699 | 1 |
| DPH6       | 0.0374228  | 1 |
| DNAJC8     | -0.0230355 | 1 |
| SMARCA2    | -0.1139214 | 1 |
| EEF1B2     | 0.1033814  | 1 |
| ITPKB      | 0.0083019  | 1 |
| SCFD2      | 0.0149989  | 1 |
| GK5        | -0.0428021 | 1 |
| SNRPE      | 0.0033312  | 1 |
| HSP90B1    | 0.1582657  | 1 |
| SENP1      | -0.0393401 | 1 |
| GRIK5      | 0.0303077  | 1 |
| SOCS2-AS1  | 0.0311698  | 1 |
| CCSER2     | 0.0234783  | 1 |
| SETD6      | -0.0228533 | 1 |
| ATP6V0A1   | 0.0037916  | 1 |
| MRPS18C    | -0.0292185 | 1 |
| HSPE1      | 0.1263008  | 1 |
| EPS15      | -0.0548418 | 1 |
| ANXA2      | 0.0477806  | 1 |
| UTP20      | -0.0003355 | 1 |
| KLC4       | -0.0170503 | 1 |
| NECAB3     | 0.0139597  | 1 |
| SPATS2     | -0.008112  | 1 |
| RCAN3      | -0.0012645 | 1 |
| EFL1       | -0.0006698 | 1 |
| BICRA      | -0.0096137 | 1 |
| KTN1-AS1   | 0.0033842  | 1 |



|            |            |   |
|------------|------------|---|
| LINC01134  | -0.0258426 | 1 |
| KCNQ5      | -0.0335489 | 1 |
| CACNA1A    | -0.0054802 | 1 |
| UTP14A     | 0.0008956  | 1 |
| DPY19L2    | -0.012945  | 1 |
| DLGAP1-AS  | 0.0388824  | 1 |
| ATP6V1F    | -0.1017191 | 1 |
| PTGS2      | 0.085948   | 1 |
| PRKAB2     | -0.012736  | 1 |
| ZNF223     | -0.0003451 | 1 |
| WIPF1      | -0.0084281 | 1 |
| TRIB1      | 0.0588685  | 1 |
| FPGT       | -0.003227  | 1 |
| COPS7A     | 0.0078511  | 1 |
| AL050309.1 | -0.0002466 | 1 |
| GLUL       | 0.1493408  | 1 |
| TMEM164    | -0.0207084 | 1 |
| HBD        | 0.90636    | 1 |
| AL034397.3 | 0.1059738  | 1 |
| DSN1       | 0.0220528  | 1 |
| DHFR2      | 0.008204   | 1 |
| TTC27      | 0.0493738  | 1 |
| AL357079.1 | 0.0162325  | 1 |
| HAUS5      | -0.0026885 | 1 |
| NUDT6      | -0.0162934 | 1 |
| CLYBL      | -0.0290294 | 1 |
| SLC25A14   | -0.0007192 | 1 |
| BGLAP      | 0.0293862  | 1 |
| ZNF334     | 0.030924   | 1 |
| AP006621.3 | 0.0313716  | 1 |
| ZDHHC16    | 0.0062664  | 1 |
| RPAIN      | 0.0023671  | 1 |
| UBLCP1     | -0.0793091 | 1 |
| SPRY2      | -0.009308  | 1 |
| NLRC5      | 0.0319408  | 1 |
| SCRN3      | -0.0025585 | 1 |
| ARMH1      | -0.0586316 | 1 |
| SNHG16     | -0.051384  | 1 |
| EPRS       | 0.1243356  | 1 |
| DNAJC3     | -0.0251264 | 1 |
| ACY3       | -0.0686516 | 1 |
| NUMBL      | 0.0288155  | 1 |
| NCBP2AS2   | 0.0172417  | 1 |
| SWT1       | 0.0200319  | 1 |
| PDGFC      | 0.043159   | 1 |
| TPI1       | 0.0751359  | 1 |
| USP42      | 0.0062776  | 1 |
| SDCBP2-AS  | -0.0268609 | 1 |
| CHKB-DT    | -0.0017131 | 1 |
| ZNF614     | 0.0063276  | 1 |

|            |            |   |
|------------|------------|---|
| RAB10      | 0.0949931  | 1 |
| CCDC137    | 0.0934258  | 1 |
| OFD1       | 0.0006322  | 1 |
| ZNF485     | 0.0065961  | 1 |
| AC004241.1 | 0.0110286  | 1 |
| ASAP1      | -0.006715  | 1 |
| POGLUT3    | 0.0170838  | 1 |
| PSME3      | 0.0088549  | 1 |
| FLT3LG     | 0.00852    | 1 |
| APOO       | 0.0333967  | 1 |
| ZNF251     | -0.0022056 | 1 |
| HNRNPH3    | -0.0210554 | 1 |
| TET1       | -0.0254631 | 1 |
| TMEM265    | -0.0193318 | 1 |
| PRR34-AS1  | -0.02783   | 1 |
| USP54      | -0.0126807 | 1 |
| USP49      | -0.0127974 | 1 |
| KSR1       | 0.0283824  | 1 |
| STAC3      | 0.023872   | 1 |
| AC064807.1 | 0.0336149  | 1 |
| UPF3A      | -0.0833813 | 1 |
| FBXO30     | 0.0191695  | 1 |
| ZNF595     | -0.016218  | 1 |
| ZNF45      | -0.0083832 | 1 |
| AC105339.6 | -0.0036147 | 1 |
| HYAL3      | -0.0192926 | 1 |
| NIPBL      | -0.0959499 | 1 |
| HIPK3      | -0.018524  | 1 |
| SPICE1     | -0.0141685 | 1 |
| CDC37L1-D  | -0.0033977 | 1 |
| AQP3       | -0.0639749 | 1 |
| DMXL2      | 0.0206403  | 1 |
| BPTF       | -0.0652449 | 1 |
| TSPAN14    | -0.0256184 | 1 |
| E4F1       | 0.0009364  | 1 |
| DDT        | 0.11661    | 1 |
| AC004889.1 | -0.0057592 | 1 |
| RAB29      | 0.0113806  | 1 |
| AL162458.1 | 0.0102378  | 1 |
| PIGB       | -0.0287354 | 1 |
| RFLNB      | -0.1424677 | 1 |
| ZFAND5     | -0.0354156 | 1 |
| AC147651.4 | -0.0329852 | 1 |
| JRK        | -0.0149939 | 1 |
| MRPS31     | -0.0249367 | 1 |
| PALB2      | -0.0162678 | 1 |
| BTD        | -0.0058962 | 1 |
| SPATA20    | 0.0096507  | 1 |
| PSMA1      | -0.0838138 | 1 |
| PTPRA      | -0.0122656 | 1 |

|            |            |   |
|------------|------------|---|
| MIER2      | -0.0015746 | 1 |
| YWHAZ      | -0.0106084 | 1 |
| FAM234B    | -0.0042324 | 1 |
| JMJD1C     | 0.102057   | 1 |
| GBA2       | -0.0448964 | 1 |
| ERCC8      | -0.024329  | 1 |
| CALHM2     | 0.0346556  | 1 |
| RNF31      | -0.0149809 | 1 |
| MCM8       | 0.0298407  | 1 |
| TECPR1     | -0.0160047 | 1 |
| TMEM268    | 0.0184159  | 1 |
| SLC2A1     | -0.044591  | 1 |
| HYI        | 0.0052637  | 1 |
| TMPRSS9    | -0.0186509 | 1 |
| CCSAP      | 0.0092807  | 1 |
| CC2D1A     | 0.0064969  | 1 |
| P2RY10     | -0.0114604 | 1 |
| ZNF280C    | -0.026795  | 1 |
| SRGAP2C    | -0.0038757 | 1 |
| CDC42      | -0.0423457 | 1 |
| PELI1      | 0.0013417  | 1 |
| CYP2R1     | -0.015178  | 1 |
| IRGQ       | -0.0117476 | 1 |
| ZGPAT      | 0.0036337  | 1 |
| POLRMT     | -0.0478821 | 1 |
| BCLAF1     | -0.0643934 | 1 |
| ZNF354B    | -0.0326081 | 1 |
| JAK2       | -0.02113   | 1 |
| CYB5D1     | 0.010635   | 1 |
| AACS       | -0.0121467 | 1 |
| CD55       | 0.0084732  | 1 |
| WAC-AS1    | -0.060595  | 1 |
| AC025181.2 | 0.0156075  | 1 |
| NDUFAF2    | 0.0184443  | 1 |
| PCBP1      | -0.0944636 | 1 |
| CITED2     | -0.0427747 | 1 |
| FRMD4A     | 0.0251293  | 1 |
| PPM1K      | -0.025633  | 1 |
| MAFF       | 0.0680312  | 1 |
| MLH1       | 0.0034641  | 1 |
| NUBPL      | -0.0187749 | 1 |
| LDLRAP1    | 0.0401058  | 1 |
| CNPY2      | 0.07468    | 1 |
| TRAF2      | 0.0161578  | 1 |
| DYTN       | -3.209E-06 | 1 |
| CLSTN1     | 0.0401048  | 1 |
| PSMA6      | 0.1163607  | 1 |
| MYL12A     | 0.1279751  | 1 |
| TAF4B      | -0.0040819 | 1 |
| ACTG1      | -0.0900051 | 1 |

|            |            |   |
|------------|------------|---|
| GEMIN8     | -0.0046488 | 1 |
| NKAP       | 0.0289056  | 1 |
| OCRL       | 0.0023816  | 1 |
| ARHGAP19   | 0.0083871  | 1 |
| SP2        | -0.0092467 | 1 |
| CEP57L1    | -0.017188  | 1 |
| PARP2      | -0.0216851 | 1 |
| BX640514.2 | -0.0323227 | 1 |
| TRAF4      | 0.0654377  | 1 |
| SSBP1      | 0.0503085  | 1 |
| LMBRD2     | -0.0368525 | 1 |
| NDUFS5     | 0.0080947  | 1 |
| AC132192.2 | 0.0352797  | 1 |
| EP400      | -0.0517768 | 1 |
| RFX1       | -0.020096  | 1 |
| CCDC191    | 0.0021955  | 1 |
| CSRNP1     | 0.0389664  | 1 |
| AC008915.2 | 0.0078117  | 1 |
| RMDN2      | -0.0089373 | 1 |
| NEU3       | -0.009701  | 1 |
| GENE       | -0.0239625 | 1 |
| C3orf33    | 0.0037206  | 1 |
| NOP14-AS1  | 0.0010296  | 1 |
| NRDC       | -0.030362  | 1 |
| TFEC       | -0.0009647 | 1 |
| PAK4       | -0.0140148 | 1 |
| TICAM1     | -0.0003164 | 1 |
| SGSM2      | 0.0077489  | 1 |
| ZNF213     | -0.0031639 | 1 |
| PYGO2      | 0.0009319  | 1 |
| DNAJC17    | 0.0280442  | 1 |
| TIRAP      | -0.0064247 | 1 |
| EIF3A      | 0.0657558  | 1 |
| UBE2D3     | -0.0167855 | 1 |
| DEGS2      | -0.0103722 | 1 |
| PLK3       | 0.0431695  | 1 |
| SPRED2     | 0.0289859  | 1 |
| PSTK       | -0.0037255 | 1 |
| CENPP      | 0.0016075  | 1 |
| MGAT5      | 0.0107863  | 1 |
| DDX11      | -0.0002235 | 1 |
| GLS        | 0.1308375  | 1 |
| AMER1      | -0.0091497 | 1 |
| AC145207.5 | -0.0167954 | 1 |
| P4HB       | -0.0041893 | 1 |
| AC093227.1 | -0.0150818 | 1 |
| ARFRP1     | 0.0284302  | 1 |
| SEPTIN6    | 0.1215183  | 1 |
| KMO        | -0.018446  | 1 |
| MSANTD3    | -0.0079632 | 1 |

|             |            |   |
|-------------|------------|---|
| NFS1        | 0.0177319  | 1 |
| RIPOR1      | -0.0132318 | 1 |
| FBXL4       | -0.0015601 | 1 |
| TASOR2      | -0.0196495 | 1 |
| EIF3E       | -0.0580292 | 1 |
| PRDM10      | -0.0206393 | 1 |
| IFFO2       | 0.0297911  | 1 |
| ZNF658      | 0.0112011  | 1 |
| C10orf143   | 0.0187339  | 1 |
| LINC00211   | 0.055692   | 1 |
| FCHSD1      | 0.0078934  | 1 |
| GDPGP1      | -0.006371  | 1 |
| ZRANB2      | -0.0885353 | 1 |
| SSX2IP      | -0.0251598 | 1 |
| PRDM4       | -0.0154773 | 1 |
| CCT3        | 0.1311471  | 1 |
| ZMYND19     | -0.0081776 | 1 |
| NAIF1       | -0.0031551 | 1 |
| RRAS        | 0.0149096  | 1 |
| GRB2        | -0.0913432 | 1 |
| DNAJC27-AS1 | 0.0132978  | 1 |
| SLC25A53    | 0.0084136  | 1 |
| LINC01857   | -0.0068644 | 1 |
| DHX33       | 0.0327258  | 1 |
| TSTD2       | -0.0202141 | 1 |
| ZNF551      | -0.0117661 | 1 |
| ENOX2       | -0.0179659 | 1 |
| ZFP1        | 0.0151932  | 1 |
| SLC25A42    | -0.0091131 | 1 |
| SLC52A3     | 0.0374742  | 1 |
| MAK16       | 0.0291573  | 1 |
| INTS2       | -0.0088581 | 1 |
| TSEN2       | 0.0085884  | 1 |
| CCDC136     | -0.0197859 | 1 |
| ZNF543      | -0.0221623 | 1 |
| AC067930.8  | -0.007013  | 1 |
| ZNF404      | -0.0176589 | 1 |
| RNF20       | -0.0298438 | 1 |
| EMC1-AS1    | 0.006808   | 1 |
| KBTBD4      | 0.0222755  | 1 |
| THRIL       | -0.0161967 | 1 |
| HIST1H2BF   | -0.0099615 | 1 |
| CAMTA2      | 0.016103   | 1 |
| CARM1       | -0.0018573 | 1 |
| STAG1       | -0.0003806 | 1 |
| MRM1        | 0.01115    | 1 |
| CD58        | -0.0034754 | 1 |
| AC108047.1  | -0.0154635 | 1 |
| BPGM        | -0.0326191 | 1 |
| REST        | -0.0871328 | 1 |

|            |            |   |
|------------|------------|---|
| DAAM1      | 0.0539113  | 1 |
| EXO5       | -0.0032397 | 1 |
| REEP5      | 0.0545665  | 1 |
| UTP25      | -0.0031424 | 1 |
| NTAN1      | 0.0095451  | 1 |
| ELL        | -0.0119842 | 1 |
| ZNF22      | 0.1216459  | 1 |
| TMEM167A   | 0.0174047  | 1 |
| RMND1      | -0.0122088 | 1 |
| CITED4     | -0.0708267 | 1 |
| NNT-AS1    | -0.0026424 | 1 |
| UBASH3B    | 0.0492461  | 1 |
| KIF3B      | -0.0257662 | 1 |
| RASA1      | 0.0207922  | 1 |
| COMMD3     | -0.0177853 | 1 |
| TRMT44     | -0.0112313 | 1 |
| AMN1       | -0.0140637 | 1 |
| LINC00909  | 0.0202013  | 1 |
| HOMER1     | -0.0265866 | 1 |
| GSPT1      | 0.0841983  | 1 |
| SACS       | 0.0300471  | 1 |
| DGUOK      | -0.0105812 | 1 |
| POLA2      | 0.0185356  | 1 |
| WDR35      | -0.0234474 | 1 |
| ZNF772     | -0.0146354 | 1 |
| EIF1AX     | 0.0791529  | 1 |
| PLOD1      | 0.002552   | 1 |
| AC092164.1 | 0.0076901  | 1 |
| DHX36      | -0.0363208 | 1 |
| BRD3OS     | -0.0103501 | 1 |
| RBX1       | -0.1193621 | 1 |
| COX10      | 0.0138964  | 1 |
| ZNF696     | -0.0081067 | 1 |
| ATP5IF1    | 0.0553223  | 1 |
| DOCK8-AS1  | -0.000225  | 1 |
| PIGA       | -8.644E-05 | 1 |
| DDX24      | 0.1052317  | 1 |
| ORMDL1     | -0.1045738 | 1 |
| CCDC59     | -0.0021552 | 1 |
| PATL2      | 0.0037775  | 1 |
| STK4       | 0.0355623  | 1 |
| KIF1B      | -0.0073434 | 1 |
| ALDH3A2    | 0.0054211  | 1 |
| RELA-DT    | 0.0107314  | 1 |
| NAA40      | 0.0098507  | 1 |
| PEX19      | 0.0014231  | 1 |
| DYRK1B     | -0.0015573 | 1 |
| INTS9      | -0.0063507 | 1 |
| AC010680.3 | -0.003518  | 1 |
| SEL1L3     | 0.0002305  | 1 |

|            |            |   |
|------------|------------|---|
| TSPYL2     | 0.0467241  | 1 |
| DENND1C    | 0.0130847  | 1 |
| SH3BGRL    | -0.0912053 | 1 |
| ZNF382     | 0.0084345  | 1 |
| GALK2      | 0.0030376  | 1 |
| IFIT3      | 0.0156632  | 1 |
| NSRP1      | -0.0752414 | 1 |
| RNF26      | -0.0107725 | 1 |
| CD27-AS1   | 0.0344481  | 1 |
| NDUFB5     | 0.0252497  | 1 |
| ABCC10     | -0.0028054 | 1 |
| ICAM4      | 0.0002237  | 1 |
| HNRNPD     | 0.0586399  | 1 |
| BX284668.5 | -0.0278043 | 1 |
| APLF       | 0.0023609  | 1 |
| NAPB       | -0.0072448 | 1 |
| ZKSCAN7    | -0.0156434 | 1 |
| EIF5B      | 0.0620587  | 1 |
| TRAM2-AS1  | 0.0063878  | 1 |
| AC004076.2 | -0.0114016 | 1 |
| ZNF148     | -0.0447303 | 1 |
| ERICH6-AS1 | 0.0063511  | 1 |
| MRPL24     | 0.058561   | 1 |
| DHRS7      | -0.0787851 | 1 |
| TBC1D25    | -0.032122  | 1 |
| AL080250.1 | -0.0117402 | 1 |
| DALRD3     | -0.0109124 | 1 |
| ZNF629     | -0.0269752 | 1 |
| ATP8B3     | -0.0212387 | 1 |
| POLD3      | 0.0163002  | 1 |
| CHIC1      | 0.0256921  | 1 |
| TESC       | 0.0207727  | 1 |
| E2F6       | 0.0156364  | 1 |
| PRXL2B     | -0.0197509 | 1 |
| CENPS      | 0.0248016  | 1 |
| HAGHL      | 0.069033   | 1 |
| DIAPH2     | 0.0145768  | 1 |
| GSTM3      | 0.0182124  | 1 |
| CDR2       | -0.0294757 | 1 |
| SLC45A3    | -0.0717854 | 1 |
| EPS8L2     | 0.0482947  | 1 |
| AC016727.1 | 0.0107584  | 1 |
| AP1S3      | -0.0016305 | 1 |
| RRNAD1     | -0.0072124 | 1 |
| AL035587.2 | 0.0164654  | 1 |
| ZNF292     | 0.0525583  | 1 |
| TTC3       | -0.0958966 | 1 |
| GDPD1      | 0.0162579  | 1 |
| ZNF76      | -0.0193181 | 1 |
| COL5A1     | 0.0349107  | 1 |

|            |            |   |
|------------|------------|---|
| SLC35G2    | 0.0168167  | 1 |
| DDHD2      | -0.0274218 | 1 |
| WDR24      | 0.0063909  | 1 |
| B4GALT6    | -0.023693  | 1 |
| ADGRE2     | 0.0349013  | 1 |
| ZNF484     | 0.0045523  | 1 |
| RAB2A      | 0.0135093  | 1 |
| RPP38      | 0.0099224  | 1 |
| KMT2E-AS1  | 0.0835418  | 1 |
| B4GALT7    | 0.0202616  | 1 |
| BPHL       | 0.014338   | 1 |
| POMT1      | -0.0231602 | 1 |
| ATP5F1C    | 0.0992612  | 1 |
| FBXO5      | 0.0135875  | 1 |
| BANP       | 0.0085178  | 1 |
| THOC7      | -0.0384054 | 1 |
| NHEJ1      | -0.0203685 | 1 |
| MESP1      | 0.0415519  | 1 |
| PKNOX1     | -0.0077564 | 1 |
| LCLAT1     | -0.0216136 | 1 |
| GALNT10    | -0.0118653 | 1 |
| LTO1       | -0.0275164 | 1 |
| AC009093.2 | -0.0274991 | 1 |
| AC069544.1 | -0.0076388 | 1 |
| MGA        | -0.0677923 | 1 |
| GPD1L      | 0.0042727  | 1 |
| RAB4A      | -0.0012256 | 1 |
| DDX51      | -0.0111483 | 1 |
| CTSS       | 0.01781    | 1 |
| C19orf54   | -0.0046209 | 1 |
| DLG4       | 0.0144094  | 1 |
| GADD45B    | -0.0058523 | 1 |
| LINC00294  | 0.0145067  | 1 |
| UROS       | 0.0639839  | 1 |
| SLTM       | -0.1323217 | 1 |
| PIAS3      | -0.0095207 | 1 |
| SBF2       | 0.0127442  | 1 |
| CC2D1B     | -0.010834  | 1 |
| DDX27      | 0.0499674  | 1 |
| ZNF626     | 0.0463466  | 1 |
| CNDP2      | 0.0082633  | 1 |
| ARHGEF17   | 0.034421   | 1 |
| GOLGA4     | -0.012441  | 1 |
| LEPR       | 0.0014791  | 1 |
| TTC9       | 0.00771    | 1 |
| TRBVB      | -0.0085593 | 1 |
| HMGA1P4    | -0.0080247 | 1 |
| CCDC159    | 0.0073336  | 1 |
| NHSL2      | 0.0009435  | 1 |
| SNX16      | -0.0040048 | 1 |



|            |            |   |
|------------|------------|---|
| PRC1       | 0.0123934  | 1 |
| ADPRH      | -0.0052147 | 1 |
| INPP5E     | 0.0070973  | 1 |
| NLN        | -0.003075  | 1 |
| BARD1      | 0.0033474  | 1 |
| RIF1       | 0.0135317  | 1 |
| ADNP2      | 0.0199554  | 1 |
| FARP2      | -0.0207258 | 1 |
| ACER3      | -0.0177237 | 1 |
| SSR2       | 0.0599357  | 1 |
| ZNF18      | -0.0077513 | 1 |
| TARBP1     | 0.0775623  | 1 |
| SPTY2D10E  | -0.0167357 | 1 |
| AL078587.2 | 0.0017796  | 1 |
| EIF5       | 0.0404735  | 1 |
| URB1       | 0.0072292  | 1 |
| INCENP     | 0.0236461  | 1 |
| LKAAEAR1   | 0.037855   | 1 |
| AUXG01000  | -0.0330646 | 1 |
| LSM2       | 0.0621876  | 1 |
| MINK1      | -0.0069663 | 1 |
| MICB       | -0.0032872 | 1 |
| KLHL12     | 0.0027396  | 1 |
| BCAP29     | 0.0114636  | 1 |
| AC245452.1 | -0.0071009 | 1 |
| NBEAL2     | 0.0369404  | 1 |
| STK24      | -0.0582095 | 1 |
| DEF8       | 0.021824   | 1 |
| PIGW       | -0.0034039 | 1 |
| PTPA       | -0.0064335 | 1 |
| CSNK2B     | -0.0068447 | 1 |
| BCLAF3     | 0.0114803  | 1 |
| C9orf72    | -0.0157358 | 1 |
| MX1        | 0.0846154  | 1 |
| FAM189B    | 0.0195282  | 1 |
| NT5DC2     | -0.0131534 | 1 |
| TAOK1      | -0.0672596 | 1 |
| SARAF      | -0.0964788 | 1 |
| SH3BP5L    | -0.0059625 | 1 |
| MAGEH1     | -0.0115278 | 1 |
| AL590652.1 | -0.0079099 | 1 |
| RORA-AS1   | -0.0326828 | 1 |
| TIGD7      | 0.0019896  | 1 |
| M6PR       | 0.0096135  | 1 |
| FSCN1      | 0.019755   | 1 |
| ANKRD11    | -0.0700244 | 1 |
| UBXN4      | 0.0473104  | 1 |
| CLHC1      | -0.0363194 | 1 |
| MMAA       | -0.0116894 | 1 |
| EIF2AK3    | -0.0100822 | 1 |

|            |            |   |
|------------|------------|---|
| MEAK7      | -0.004694  | 1 |
| GPBP1      | -0.0343441 | 1 |
| MORF4L2-A  | -0.0293724 | 1 |
| ARL4A      | -0.0671734 | 1 |
| PLA2G15    | 0.0362797  | 1 |
| OGT        | 0.0471044  | 1 |
| RELL1      | 0.0114263  | 1 |
| ANKMY1     | -0.032479  | 1 |
| PLD4       | -0.0705873 | 1 |
| KIF23      | -0.0243828 | 1 |
| STK32B     | -0.0079232 | 1 |
| IFT81      | 0.0164949  | 1 |
| C4orf3     | 0.0412059  | 1 |
| MEF2B      | -0.0107049 | 1 |
| NR3C1      | 0.0148787  | 1 |
| CDC7       | 0.0031017  | 1 |
| CDKL3      | -0.0162272 | 1 |
| FOXRED2    | 0.0251579  | 1 |
| FOSL2      | -0.0361412 | 1 |
| PEMT       | 0.0431123  | 1 |
| DPH2       | 0.0130514  | 1 |
| REV3L      | -0.0091816 | 1 |
| ST13       | -0.0923233 | 1 |
| PHF3       | 0.0135656  | 1 |
| LINC00174  | 0.0007763  | 1 |
| C9orf40    | 0.0312714  | 1 |
| MAP4K4     | 0.0263053  | 1 |
| GPAT4      | 0.0202604  | 1 |
| TMEM185A   | -0.0055432 | 1 |
| ZNF839     | 0.0254375  | 1 |
| BCORL1     | -0.0031747 | 1 |
| AC012146.1 | 0.0002972  | 1 |
| AC016065.1 | 0.0103889  | 1 |
| ZFP30      | -0.0135447 | 1 |
| HIVEP1     | -0.041758  | 1 |
| SCAF8      | -0.0393355 | 1 |
| IMPACT     | -0.0327138 | 1 |
| PEAK1      | 0.0095256  | 1 |
| ALDH16A1   | -0.0174295 | 1 |
| SREBF1     | 0.0347758  | 1 |
| FDXR       | 0.0135703  | 1 |
| ZNF77      | 0.0076423  | 1 |
| HEATR6     | 0.0115807  | 1 |
| ESF1       | 0.0053518  | 1 |
| DNM1       | 0.0169344  | 1 |
| IDE        | -0.0283135 | 1 |
| PCNT       | -0.0452879 | 1 |
| HMG3       | -0.0010772 | 1 |
| SLC25A44   | -0.0099182 | 1 |
| ZNF829     | 0.0094222  | 1 |

|            |            |   |
|------------|------------|---|
| AC011603.2 | 0.0003669  | 1 |
| ZNF175     | -0.0146742 | 1 |
| DENND6A    | -0.0624878 | 1 |
| LRP12      | 0.0080076  | 1 |
| HHLA3      | 0.0159174  | 1 |
| PCM1       | -0.0406546 | 1 |
| NOP10      | -0.0462689 | 1 |
| SHF        | 0.0180974  | 1 |
| HADHA      | -0.0471331 | 1 |
| HCFC2      | 0.0023642  | 1 |
| TRIM44     | 0.0145303  | 1 |
| CISD2      | -0.0137051 | 1 |
| HSF2       | -0.0081839 | 1 |
| NORAD      | -0.0049274 | 1 |
| SET        | -0.0775588 | 1 |
| SIRT3      | -0.0050164 | 1 |
| IFIT1      | 0.0553792  | 1 |
| SC5D       | -0.0195926 | 1 |
| SPATA2L    | 2.658E-05  | 1 |
| RNF217-AS' | -0.0032607 | 1 |
| PRKAR1B    | -0.017373  | 1 |
| H2AFX      | -0.0653541 | 1 |
| RAD51B     | 0.0114911  | 1 |
| AC012020.1 | -0.0065234 | 1 |
| NSMCE1-DT  | 0.0224391  | 1 |
| DOHH       | 0.0197424  | 1 |
| SMAD3      | 0.0229209  | 1 |
| R3HCC1L    | 0.0060101  | 1 |
| PQBP1      | 0.0123766  | 1 |
| ZNF507     | -0.0157007 | 1 |
| RARS       | -1.369E-07 | 1 |
| INPP1      | -0.0408712 | 1 |
| MICA       | -0.0093599 | 1 |
| CASP10     | 0.0373756  | 1 |
| PRKAR2B    | 0.02904    | 1 |
| CXCL8      | 0.4079263  | 1 |
| GSTK1      | 0.0643345  | 1 |
| NAPA-AS1   | 0.0259563  | 1 |
| DTNB       | -0.0175392 | 1 |
| MEGF8      | -0.0094437 | 1 |
| CEP350     | -0.0874859 | 1 |
| RBFADN     | -0.0202764 | 1 |
| GAS8       | 0.0084284  | 1 |
| AC087239.1 | 0.0526653  | 1 |
| TBC1D22B   | 0.0004835  | 1 |
| MAP3K8     | 0.0236113  | 1 |
| LDHB       | 0.1357534  | 1 |
| AL022162.1 | -0.0083502 | 1 |
| ENY2       | 0.0486104  | 1 |
| SLC16A1    | 0.0341441  | 1 |

|            |            |   |
|------------|------------|---|
| AL132709.8 | 0.01606    | 1 |
| HSD11B1L   | -0.0045366 | 1 |
| S100A1     | 0.0399291  | 1 |
| CENPQ      | 0.0020324  | 1 |
| AC007390.2 | -0.0262453 | 1 |
| SNRPB2     | -0.0644344 | 1 |
| KIF18A     | 0.0167684  | 1 |
| TCEAL8     | -0.0341644 | 1 |
| ID2        | -0.1115483 | 1 |
| RPS26      | -0.0547492 | 1 |
| ALG13      | -0.0552978 | 1 |
| YJEFN3     | 0.0098377  | 1 |
| AC016394.1 | 0.0020384  | 1 |
| CCDC121    | 0.0213117  | 1 |
| TTLL1      | 0.0295577  | 1 |
| TANC2      | -0.0276234 | 1 |
| AC004803.1 | -0.0226419 | 1 |
| RBM39      | 0.1639785  | 1 |
| AC092620.1 | -0.0138362 | 1 |
| NETO2      | 0.021026   | 1 |
| AP3M2      | 0.0056635  | 1 |
| SMYD5      | -0.0031734 | 1 |
| GPR146     | 0.0514145  | 1 |
| EZH2       | -0.0109453 | 1 |
| AIFM2      | -0.0009238 | 1 |
| DNAJA4     | 0.0139978  | 1 |
| BTRC       | 0.0047238  | 1 |
| TRIM35     | -0.0088132 | 1 |
| AC005726.1 | -0.0093502 | 1 |
| ANKRD26    | -0.0183651 | 1 |
| ZNF219     | -0.0068738 | 1 |
| ZDHHC6     | -0.0111319 | 1 |
| TOMM6      | 0.0536716  | 1 |
| SSU72      | 0.0026539  | 1 |
| ZBTB38     | -0.0247741 | 1 |
| ASH1L      | -0.0443912 | 1 |
| DSE        | -0.0124372 | 1 |
| CEP78      | 0.0045117  | 1 |
| AC093849.4 | -0.0091528 | 1 |
| GEMIN2     | -0.0045312 | 1 |
| ZNF85      | -0.034726  | 1 |
| LRRC45     | 0.0207864  | 1 |
| AC026979.4 | -0.0171491 | 1 |
| STX18-AS1  | 0.0010849  | 1 |
| MTHFSD     | -0.0180654 | 1 |
| HMGB3      | -0.0851151 | 1 |
| ZNF837     | 0.0002218  | 1 |
| LAT2       | -0.0960517 | 1 |
| ARRDC1-AS  | -0.0028875 | 1 |
| MAP7       | 0.0313071  | 1 |

|            |            |   |
|------------|------------|---|
| SH3RF1     | 0.0214564  | 1 |
| AMPD2      | 0.0366974  | 1 |
| ATP5MPL    | -0.0911249 | 1 |
| LRRC8C     | -0.0310462 | 1 |
| PRDX5      | -0.0817558 | 1 |
| RBM43      | 0.0372535  | 1 |
| AC103691.1 | 0.0066865  | 1 |
| ZNF74      | -0.0130014 | 1 |
| EXOC2      | -0.0357732 | 1 |
| AC026401.3 | -0.0067536 | 1 |
| ZHX1       | 0.0146285  | 1 |
| SLC5A10    | 0.0463874  | 1 |
| RIC8B      | -0.0047544 | 1 |
| SCRN1      | 0.0481203  | 1 |
| GAPDH      | 0.1023499  | 1 |
| ATRIP      | 0.0066914  | 1 |
| TXNDC16    | 0.0067173  | 1 |
| NXF1       | -0.0069829 | 1 |
| CKM        | 0.0091338  | 1 |
| STBD1      | 0.0317106  | 1 |
| KIZ        | 0.0244223  | 1 |
| TMEM182    | -0.0185185 | 1 |
| TPCN2      | -0.0195639 | 1 |
| FAM200A    | 0.0048863  | 1 |
| FNDC10     | 0.0299722  | 1 |
| ITSN2      | -0.0169154 | 1 |
| SPART      | -0.1362544 | 1 |
| TTC8       | -0.0148609 | 1 |
| CAPRIN2    | -0.0646876 | 1 |
| GP1BB      | 0.2146806  | 1 |
| CROCC      | -0.0261229 | 1 |
| KIAA0355   | -0.0505867 | 1 |
| INAFM1     | 0.0043398  | 1 |
| ATAD3B     | 0.0256209  | 1 |
| AC090559.2 | -0.011922  | 1 |
| AC000065.2 | 0.008685   | 1 |
| SLC12A9    | 0.0407712  | 1 |
| ATP5F1A    | 0.0218235  | 1 |
| EDF1       | 0.1035671  | 1 |
| HRAS       | 0.0279574  | 1 |
| ALCAM      | -0.0410422 | 1 |
| DCLRE1A    | -0.0088336 | 1 |
| AL162253.2 | -0.00303   | 1 |
| ATXN7L3B   | 0.0999891  | 1 |
| GPAM       | -0.0007137 | 1 |
| ERCC1      | -0.0202283 | 1 |
| DHX58      | -0.0058881 | 1 |
| DNHD1      | 0.0010157  | 1 |
| CCDC142    | 0.0160681  | 1 |
| LINC02482  | -0.0292054 | 1 |

|            |            |   |
|------------|------------|---|
| MYCBPAP    | 0.0158553  | 1 |
| BORCS8     | 0.0153566  | 1 |
| SRSF11     | 0.0833037  | 1 |
| TRIM41     | -0.0097981 | 1 |
| ZNF526     | 0.0052762  | 1 |
| SP4        | -0.0165709 | 1 |
| ENTPD5     | -0.0059437 | 1 |
| EIF3I      | 0.0688411  | 1 |
| AREL1      | -0.0308193 | 1 |
| RBM26      | -0.0433379 | 1 |
| NREP       | 0.025464   | 1 |
| ABLIM1     | -0.0066889 | 1 |
| LINC01137  | 0.0208136  | 1 |
| AL158212.3 | -0.0173821 | 1 |
| POC1B-AS1  | 0.0101495  | 1 |
| COQ10A     | 0.0101889  | 1 |
| OSM        | 0.026922   | 1 |
| DUSP5      | 0.042565   | 1 |
| MSANTD4    | 0.0255785  | 1 |
| RECK       | 0.0233529  | 1 |
| RTL10      | 0.0189006  | 1 |
| VPS52      | -0.0138631 | 1 |
| ZNF383     | -0.0040237 | 1 |
| ZNF225     | -0.0053475 | 1 |
| PINLYP     | 0.0121718  | 1 |
| LCORL      | -0.0110904 | 1 |
| BET1L      | -0.0131662 | 1 |
| STXBP5     | -0.0178391 | 1 |
| AC130895.1 | -0.0191559 | 1 |
| CDKN2D     | 0.0436277  | 1 |
| HSPA1B     | 0.0278702  | 1 |
| APPL1      | 0.0462666  | 1 |
| DARS2      | 0.0128242  | 1 |
| MT-CO1     | 0.0535814  | 1 |
| VPS54      | -0.0511415 | 1 |
| VEGFB      | -0.019912  | 1 |
| AC019069.1 | 0.0242294  | 1 |
| ANXA2R     | 0.0330581  | 1 |
| ZNF813     | 0.0050684  | 1 |
| ZBTB2      | -0.0160078 | 1 |
| SLC49A4    | -0.0036159 | 1 |
| PUS7       | 0.0204043  | 1 |
| AL359644.1 | 0.0010205  | 1 |
| WDR83OS    | 0.0657286  | 1 |
| TRIM16L    | 0.0016161  | 1 |
| EML4       | 0.0009007  | 1 |
| GSPT2      | -0.0100354 | 1 |
| ELL2       | -0.0278558 | 1 |
| TRMT2B     | -0.0420827 | 1 |
| ZNF30      | -0.0125643 | 1 |

|            |            |   |
|------------|------------|---|
| KBTBD11    | 0.0002097  | 1 |
| EMP1       | 0.0772343  | 1 |
| RBM8A      | -0.0650588 | 1 |
| LINC00662  | -0.0213879 | 1 |
| CNOT6L     | -0.0110582 | 1 |
| AC020658.5 | 0.0046342  | 1 |
| ALKBH7     | 0.02342    | 1 |
| DSTYK      | 0.0030584  | 1 |
| ABHD17C    | 0.028106   | 1 |
| DYNLT3     | 0.0169456  | 1 |
| ARHGAP5    | 0.0035566  | 1 |
| POU2F2     | 0.0679161  | 1 |
| DZANK1     | 0.0135087  | 1 |
| KNTC1      | 0.0371278  | 1 |
| ADAMDEC1   | 0.0238047  | 1 |
| AC006427.2 | 0.0012898  | 1 |
| CD164      | 0.1906051  | 1 |
| CACTIN     | -0.0116398 | 1 |
| RAB30-DT   | 0.0448421  | 1 |
| RPLP0      | 0.0770737  | 1 |
| TIPIN      | 0.0211529  | 1 |
| ZNF236     | -0.0197524 | 1 |
| COX7C      | -0.0539511 | 1 |
| CSRNP2     | -0.035265  | 1 |
| ADAL       | -0.0367841 | 1 |
| GCNT1      | 0.0124598  | 1 |
| TMEM120A   | 0.0022194  | 1 |
| LY6G5C     | 0.0301387  | 1 |
| ZBTB45     | 0.0063606  | 1 |
| INO80E     | -0.0029601 | 1 |
| SMIM14     | -0.0124031 | 1 |
| AC124248.1 | -0.007036  | 1 |
| KIAA0556   | 0.0082773  | 1 |
| AC127496.5 | -0.0246745 | 1 |
| SLC4A5     | -0.0172    | 1 |
| AL442125.1 | -0.012443  | 1 |
| PARD6B     | 0.0081411  | 1 |
| MDGA1      | -0.0051163 | 1 |
| DGAT1      | -0.0112293 | 1 |
| EXOC8      | -0.0266218 | 1 |
| RECQL5     | -0.0128395 | 1 |
| ESD        | 0.0570102  | 1 |
| AC090517.2 | -0.0232966 | 1 |
| TDRD7      | -0.0054217 | 1 |
| PSMA5      | 0.0102672  | 1 |
| DNAH14     | 0.0016776  | 1 |
| ZNF470     | -0.0129104 | 1 |
| LINC00910  | -0.0264711 | 1 |
| LDAH       | -0.021429  | 1 |
| CNNM2      | -0.0345386 | 1 |

|            |            |   |
|------------|------------|---|
| CDCP1      | 0.0164072  | 1 |
| GIMAP8     | -0.0099301 | 1 |
| LSP1       | 0.0345707  | 1 |
| PRPSAP1    | 0.0205548  | 1 |
| DENND2D    | 0.0071127  | 1 |
| ZNF513     | 0.003496   | 1 |
| TRAPPC9    | 0.0107805  | 1 |
| CHCHD2     | 0.0551975  | 1 |
| AL391121.1 | 0.0043086  | 1 |
| TTC38      | -0.0014554 | 1 |
| GAS5       | -0.0730722 | 1 |
| AFF1       | 0.0460738  | 1 |
| RTRAF      | 0.0256847  | 1 |
| KMT2A      | 0.0654806  | 1 |
| RHOA       | -0.0572276 | 1 |
| ECT2       | 0.0152541  | 1 |
| PRR14L     | -0.0363805 | 1 |
| ADAMTS6    | 0.0106709  | 1 |
| HSDL1      | -0.0121194 | 1 |
| SMIM13     | 0.0019949  | 1 |
| ZNF670     | -0.0042029 | 1 |
| HIST1H3H   | -0.0647405 | 1 |
| RETN       | -0.0187049 | 1 |
| TNRC6C-AS  | -0.022321  | 1 |
| RAB9B      | 0.0038123  | 1 |
| ZNF296     | 0.0075164  | 1 |
| SMIM26     | -0.0623267 | 1 |
| ARRB1      | 0.0211098  | 1 |
| MOB2       | 0.0137631  | 1 |
| RTL8A      | 0.011688   | 1 |
| ZNF691     | 0.0099946  | 1 |
| FIZ1       | 0.0037142  | 1 |
| GIHCG      | -0.0703626 | 1 |
| TTC1       | -0.0127695 | 1 |
| THRAP3     | 0.0457474  | 1 |
| SBF2-AS1   | -0.0226806 | 1 |
| DBI        | 0.0012126  | 1 |
| MICALL1    | -0.0107979 | 1 |
| CCDC146    | -0.0090114 | 1 |
| RPAP1      | -0.0098434 | 1 |
| SPACA9     | -0.009981  | 1 |
| SOD1       | 0.0746627  | 1 |
| CNNM3      | -0.0005893 | 1 |
| PRICKLE3   | 0.0099699  | 1 |
| AL451165.2 | 0.0022437  | 1 |
| ANP32A     | 0.0092039  | 1 |
| GPR137     | 0.0083427  | 1 |
| PDIA5      | 0.0410225  | 1 |
| RTN4IP1    | 0.0067027  | 1 |
| LINC02021  | -0.0071915 | 1 |



|            |            |   |
|------------|------------|---|
| CNEP1R1    | -0.0082473 | 1 |
| TMEM51     | -0.019747  | 1 |
| RPL5       | 0.0599546  | 1 |
| NPM2       | 0.0342407  | 1 |
| CAP1       | 0.0764238  | 1 |
| PTP4A2     | -0.1025974 | 1 |
| RINL       | 0.0224945  | 1 |
| POLR1E     | 0.037139   | 1 |
| ABCA5      | -0.0061221 | 1 |
| GAN        | 0.000664   | 1 |
| MACC1      | 0.0138186  | 1 |
| SEC61G     | -0.0112875 | 1 |
| RGCC       | 0.0698213  | 1 |
| TCP11L1    | -0.0112147 | 1 |
| ID1        | 0.0297558  | 1 |
| AC012360.3 | -0.0127944 | 1 |
| SULF2      | -0.0144579 | 1 |
| ZNF726     | 0.003523   | 1 |
| TSPAN13    | 0.0378123  | 1 |
| RPS27L     | 0.0592322  | 1 |
| DONSON     | -0.0089353 | 1 |
| AC119396.1 | -0.0125285 | 1 |
| PARP15     | 0.0162824  | 1 |
| BRCA2      | 0.0283862  | 1 |
| TYW5       | -0.050123  | 1 |
| SENP3      | -0.0076626 | 1 |
| MIR3936HG  | 0.0095686  | 1 |
| GKAP1      | 0.0377086  | 1 |
| ATP8B2     | 0.0343262  | 1 |
| MSRB3      | 0.0616393  | 1 |
| SMARCC1    | -0.0276373 | 1 |
| MAN2A2     | -0.0702507 | 1 |
| CLNS1A     | 0.035497   | 1 |
| TSPAN17    | 0.0066495  | 1 |
| SH3BP4     | -0.0002701 | 1 |
| OAZ1       | -0.0848627 | 1 |
| ENTPD3-AS  | -0.0119439 | 1 |
| TMEM53     | 0.0116758  | 1 |
| MAST2      | 0.0040799  | 1 |
| SCAPER     | 0.01699    | 1 |
| LTA4H      | -0.0356427 | 1 |
| EIF3K      | 0.0765121  | 1 |
| SRSF9      | 0.1014047  | 1 |
| PPP1R12A   | 0.039609   | 1 |
| TOP1       | -0.0290466 | 1 |
| CASTOR3    | 0.0012644  | 1 |
| DUS2       | -0.0100028 | 1 |
| TGOLN2     | -0.0165447 | 1 |
| EARS2      | 0.0053411  | 1 |
| AL121944.1 | -0.0030825 | 1 |

|            |            |   |
|------------|------------|---|
| TBCA       | -0.12677   | 1 |
| APOL3      | 0.0030682  | 1 |
| CCL28      | 0.0336617  | 1 |
| TMBIM4     | -0.0136695 | 1 |
| FBXL12     | 9.929E-05  | 1 |
| AC004687.1 | 0.073143   | 1 |
| SCAF11     | -0.0263326 | 1 |
| PRPF40A    | 0.0367348  | 1 |
| PYROXD2    | -0.0127492 | 1 |
| PHF2       | -0.0240918 | 1 |
| AC018647.2 | -0.0099087 | 1 |
| MSH5       | 0.0139185  | 1 |
| LINC01176  | -0.0205699 | 1 |
| ACVR1      | -0.0399259 | 1 |
| OR2L2      | 0.0160114  | 1 |
| CCNA1      | 0.0072239  | 1 |
| PEX11A     | 0.0146744  | 1 |
| KIF1BP     | 0.0378069  | 1 |
| DVL1       | 0.0043928  | 1 |
| ARHGAP23   | 0.0244388  | 1 |
| PIK3C2B    | 0.0368621  | 1 |
| FCGRT      | -0.0227149 | 1 |
| ITM2B      | 0.0676438  | 1 |
| CUTA       | -0.0069988 | 1 |
| WDYHV1     | -0.0081157 | 1 |
| ZNF17      | -0.0047136 | 1 |
| VDAC1      | 0.044386   | 1 |
| LONRF1     | 0.0153108  | 1 |
| RAD52      | -0.0264497 | 1 |
| SASS6      | -0.0374757 | 1 |
| ARIH2OS    | -0.0282784 | 1 |
| EMILIN1    | 0.0375428  | 1 |
| TAF11      | 0.008898   | 1 |
| VAC14      | -0.0082716 | 1 |
| TCTEX1D2   | 0.0169522  | 1 |
| MVB12B     | -0.0161867 | 1 |
| ZNF14      | -0.0027533 | 1 |
| AL592295.5 | 0.0015819  | 1 |
| MFSD13A    | -0.0093054 | 1 |
| VILL       | 0.0002874  | 1 |
| MED24      | -0.0073815 | 1 |
| CEP250     | -0.0023878 | 1 |
| CD74       | 0.0691956  | 1 |
| BBS7       | -0.0155319 | 1 |
| EIF4A1     | 0.0920591  | 1 |
| JMJD4      | 0.0269133  | 1 |
| DNAJC2     | 0.0538592  | 1 |
| AC004540.1 | -0.0294038 | 1 |
| PPIB       | 0.1166812  | 1 |
| TIAM2      | -0.0109502 | 1 |

|            |            |   |
|------------|------------|---|
| ACRBP      | 0.017051   | 1 |
| AL035446.1 | 0.0979576  | 1 |
| OTUD1      | 0.0080832  | 1 |
| RYK        | 0.0606712  | 1 |
| AGMAT      | -0.0016199 | 1 |
| ATG9A      | 0.0316561  | 1 |
| RPRD1B     | 0.0098236  | 1 |
| C10orf88   | 0.0025268  | 1 |
| ZNF749     | 0.0108783  | 1 |
| C14orf93   | -0.0042502 | 1 |
| AC008771.1 | -0.0066223 | 1 |
| CNPY4      | -0.000585  | 1 |
| ZBTB3      | 0.0050437  | 1 |
| TRMT1L     | 0.0066117  | 1 |
| TRDMT1     | -0.0169803 | 1 |
| FAM24B     | 0.0038269  | 1 |
| CTSW       | 0.0262064  | 1 |
| PCF11      | -0.0910888 | 1 |
| NPEPL1     | 0.0161829  | 1 |
| ESS2       | 0.007433   | 1 |
| MED20      | 0.013618   | 1 |
| UBE2I      | -0.0336004 | 1 |
| TBC1D14    | 0.0189847  | 1 |
| BRMS1L     | -0.0136721 | 1 |
| FZR1       | -0.0054156 | 1 |
| NUDT12     | 0.0281492  | 1 |
| SCLY       | 0.0115015  | 1 |
| EEF1AKMT1  | -0.0029081 | 1 |
| PRPF40B    | -0.0062926 | 1 |
| TRIM26     | 0.0008956  | 1 |
| CASTOR1    | 0.0041356  | 1 |
| CDPF1      | 0.0114251  | 1 |
| MIGA2      | -0.006712  | 1 |
| AL355377.3 | -0.0159822 | 1 |
| TRMT61A    | 0.0161914  | 1 |
| FAM131A    | -0.0015432 | 1 |
| MYCBP2     | -0.0068669 | 1 |
| CCDC171    | -0.0099586 | 1 |
| LINC01473  | -0.008395  | 1 |
| CA3-AS1    | -0.0095371 | 1 |
| CA13       | 0.0022578  | 1 |
| SLC27A3    | 0.0313081  | 1 |
| C16orf46   | -0.0041589 | 1 |
| SGK3       | -0.0466019 | 1 |
| LARP7      | -0.0887366 | 1 |
| RPL13A     | -0.0440454 | 1 |
| CRTC3      | -0.0292823 | 1 |
| CTSA       | -0.0204399 | 1 |
| PDCD4-AS1  | -0.0200759 | 1 |
| PNMA6A     | -0.0050815 | 1 |

|            |            |   |
|------------|------------|---|
| CCDC149    | -0.0309531 | 1 |
| SEC24D     | -0.0118741 | 1 |
| PLXNA3     | 0.0077642  | 1 |
| CEP162     | -0.0360936 | 1 |
| C4orf33    | 0.0162319  | 1 |
| ZNF710-AS1 | -0.0403727 | 1 |
| CEP295     | -0.0315863 | 1 |
| RAB40B     | -0.0224543 | 1 |
| PLCL2      | 0.0012224  | 1 |
| FAM161A    | 0.0083989  | 1 |
| PIK3AP1    | -0.0171267 | 1 |
| MICALL2    | -0.0188083 | 1 |
| TRIR       | 0.0391231  | 1 |
| GNPTAB     | 0.0110688  | 1 |
| NDUFB1     | -0.0919764 | 1 |
| LINC02470  | 0.0515233  | 1 |
| METTL2A    | 0.0148753  | 1 |
| SLC25A6    | -0.0689026 | 1 |
| MIER1      | -0.0237869 | 1 |
| ATP1A1-AS1 | -0.0008209 | 1 |
| TKT        | -0.0733888 | 1 |
| DYRK2      | 0.0086164  | 1 |
| PHYHD1     | -0.0229632 | 1 |
| IFT140     | -0.0004562 | 1 |
| SMIM15     | 0.0313384  | 1 |
| KIF13B     | 0.0149902  | 1 |
| IGF2BP3    | 0.0481237  | 1 |
| COMMD6     | -0.0438105 | 1 |
| TRMT11     | 0.015339   | 1 |
| GMPR       | -0.0258438 | 1 |
| ANKRD12    | -0.0296672 | 1 |
| TULP3      | 0.0114558  | 1 |
| PPARGC1B   | 0.0025273  | 1 |
| MYO18A     | -0.000106  | 1 |
| CLDND1     | 0.0533232  | 1 |
| MSN        | 0.0397758  | 1 |
| AL591845.1 | -0.0017799 | 1 |
| STAM       | -0.0279523 | 1 |
| AC027279.1 | -0.0059504 | 1 |
| EOGT       | -0.0121005 | 1 |
| DSC2       | 0.0520874  | 1 |
| SLC35C1    | -0.0109899 | 1 |
| HNRNPA2B1  | 0.1301545  | 1 |
| AC004943.2 | -0.0009064 | 1 |
| ENKD1      | 0.0088468  | 1 |
| NME2       | 0.1099275  | 1 |
| TNRC6C     | -0.0198438 | 1 |
| ATP5PD     | -0.0391217 | 1 |
| AC091057.6 | -0.0099108 | 1 |
| SLC25A3    | 0.0809087  | 1 |

|            |            |   |
|------------|------------|---|
| ADAMTSL4-  | 0.043526   | 1 |
| VAR2       | 0.0013701  | 1 |
| PSMA2      | 0.0363536  | 1 |
| ARFIP1     | 0.0101703  | 1 |
| IL4R       | 0.0135744  | 1 |
| SRGAP2B    | -0.011423  | 1 |
| NEXN       | -0.0494856 | 1 |
| RTP4       | 0.025751   | 1 |
| IQSEC3     | -0.0003891 | 1 |
| ZHX3       | 0.017231   | 1 |
| COX6C      | -0.0677185 | 1 |
| UXT        | 0.0123246  | 1 |
| ZNF763     | -0.0023377 | 1 |
| AC091729.3 | -0.0141172 | 1 |
| MTBP       | -0.0115425 | 1 |
| AL117332.1 | 0.0051474  | 1 |
| ZNF880     | -0.0120488 | 1 |
| C18orf54   | -0.0198405 | 1 |
| ARRDC3-AS  | -0.0205645 | 1 |
| RNF25      | 0.001393   | 1 |
| TCEAL9     | -0.0616529 | 1 |
| TMEM181    | 0.0026247  | 1 |
| ZNF284     | -0.0178656 | 1 |
| MARCKSL1   | -0.0612795 | 1 |
| ALG1L2     | -0.0183287 | 1 |
| C3orf35    | -0.0132256 | 1 |
| ALG12      | -0.0123124 | 1 |
| OST4       | 0.0979949  | 1 |
| PRR3       | -0.0065115 | 1 |
| XAF1       | -0.0372324 | 1 |
| HIGD2A     | 0.0505405  | 1 |
| CENPL      | -0.006863  | 1 |
| HMG2       | 0.0431221  | 1 |
| VANGL1     | -0.0039008 | 1 |
| AC095057.3 | -0.0230262 | 1 |
| SPRYD3     | 0.0052922  | 1 |
| SLC1A3     | -0.0308884 | 1 |
| PTGES3     | -0.0655482 | 1 |
| CPVL       | -0.1238028 | 1 |
| AC009812.1 | -0.0135608 | 1 |
| EMP3       | -0.0142608 | 1 |
| TIPARP-AS1 | 0.0157977  | 1 |
| LINC02352  | -0.0357731 | 1 |
| BTN2A2     | 0.0066784  | 1 |
| HINT1      | 0.0348746  | 1 |
| VPS33B     | 0.0089302  | 1 |
| C21orf58   | 0.0145832  | 1 |
| HIST2H2AA4 | -0.0330751 | 1 |
| ELANE      | 0.0469829  | 1 |
| FOCAD      | 0.0024897  | 1 |

|            |            |   |
|------------|------------|---|
| MT-ND4     | 0.0630676  | 1 |
| GALNT6     | -0.0027661 | 1 |
| SEC22A     | -0.0066002 | 1 |
| JTB        | 0.0296996  | 1 |
| TRPV1      | -0.0085637 | 1 |
| AEN        | 0.0021739  | 1 |
| EML2-AS1   | -0.0129687 | 1 |
| HIST1H2AK  | -0.0459868 | 1 |
| PEX7       | -0.0086204 | 1 |
| CNTRL      | 0.0644417  | 1 |
| ARHGAP12   | 0.0146628  | 1 |
| ZNF700     | -0.0230321 | 1 |
| NDUFC1     | -0.054986  | 1 |
| ANAPC11    | 0.0431809  | 1 |
| SPHK2      | -0.0147504 | 1 |
| SFXN1      | 0.0433115  | 1 |
| U2SURP     | 0.0210306  | 1 |
| DDX46      | -0.0086444 | 1 |
| RPS23      | 0.056027   | 1 |
| ANKRD18B   | 0.0327729  | 1 |
| A POM      | 0.0009147  | 1 |
| CYP2U1     | 0.010518   | 1 |
| IFIT2      | 0.0296525  | 1 |
| IPO4       | 0.0206017  | 1 |
| SVOPL      | 0.0263535  | 1 |
| MED22      | 0.0057205  | 1 |
| RCAN1      | 0.0190382  | 1 |
| SUN1       | 0.0056089  | 1 |
| TRAPPC5    | -0.0366206 | 1 |
| AURKA      | -0.0148591 | 1 |
| TLN1       | -0.0290472 | 1 |
| AC145285.6 | 0.0268899  | 1 |
| ZFYVE16    | -0.0571848 | 1 |
| DHRS13     | -0.005843  | 1 |
| EIF3L      | -0.0345602 | 1 |
| TRIM66     | -0.0043276 | 1 |
| KNSTRN     | 0.0121393  | 1 |
| EIF1B      | -0.0051567 | 1 |
| SLFN12     | -0.020903  | 1 |
| IFT46      | -0.0004348 | 1 |
| ZNF624     | -0.0047036 | 1 |
| MIEF2      | 0.0052981  | 1 |
| CHCHD6     | 0.0354213  | 1 |
| HIST1H4H   | -0.0220324 | 1 |
| CNNM4      | 0.023709   | 1 |
| CEBPD      | -0.0293695 | 1 |
| PURA       | 0.0432074  | 1 |
| WDR31      | 0.0060598  | 1 |
| CHURC1     | 0.073228   | 1 |
| AC004812.2 | -0.0015244 | 1 |

|             |            |   |
|-------------|------------|---|
| TRIM61      | 0.0196215  | 1 |
| KIAA1549    | -0.0131703 | 1 |
| YY1         | -0.0285179 | 1 |
| GEMIN5      | 0.0340656  | 1 |
| ZNF771      | -0.0011737 | 1 |
| MIR646HG    | 0.0182269  | 1 |
| SRSF6       | -0.0825298 | 1 |
| WDR19       | -0.028917  | 1 |
| TRAPPC1     | 0.0719086  | 1 |
| PHLDB3      | 0.0189679  | 1 |
| MAP11       | -0.0113819 | 1 |
| TAF1C       | -0.0068545 | 1 |
| SLC15A2     | 0.011553   | 1 |
| SHANK3      | 0.0441512  | 1 |
| AC016949.1  | -0.0058467 | 1 |
| TYROBP      | -0.0799854 | 1 |
| BNIP3       | 0.0284882  | 1 |
| PLEK        | 0.0301822  | 1 |
| SNHG8       | -0.0572731 | 1 |
| UQCRQ       | -0.0469945 | 1 |
| RPL12       | -0.0513509 | 1 |
| B3GALT4     | 0.0123671  | 1 |
| KIF16B      | 0.0151219  | 1 |
| HIST1H2BE   | 0.005689   | 1 |
| RSRC2       | -0.0355142 | 1 |
| ZFYVE28     | 0.0178057  | 1 |
| RAP1B       | -0.0461071 | 1 |
| BBS9        | -0.0008583 | 1 |
| ABCD3       | -0.0112007 | 1 |
| AL139260.1  | -0.0121693 | 1 |
| SNX24       | -0.0172221 | 1 |
| POLK        | -0.0162278 | 1 |
| THG1L       | 0.0229804  | 1 |
| TSC22D1-AS1 | -0.0018056 | 1 |
| CD3EAP      | 0.0061436  | 1 |
| PCMTD1      | 0.0435437  | 1 |
| RGL4        | 0.0182206  | 1 |
| ACTR3       | -0.023865  | 1 |
| ADAM9       | -0.0063882 | 1 |
| HNRNPM      | 0.0375591  | 1 |
| FNTA        | -0.0170285 | 1 |
| SLC37A4     | 0.0048969  | 1 |
| TRIT1       | 0.0169795  | 1 |
| RNASEL      | 0.0039775  | 1 |
| AC020656.1  | -0.0591515 | 1 |
| EDC3        | -0.0087291 | 1 |
| COX7B       | 0.0035452  | 1 |
| MFSD9       | 0.0022021  | 1 |
| MYOZ3       | 0.0331738  | 1 |
| CCPG1       | 0.0388754  | 1 |

|            |            |   |
|------------|------------|---|
| ACADSB     | -0.0232807 | 1 |
| SUV39H2    | 0.0092689  | 1 |
| DNA2       | -0.0052744 | 1 |
| NBPF3      | -0.0248775 | 1 |
| ZBTB8A     | 0.0176253  | 1 |
| RNASEH2B   | 0.0221731  | 1 |
| GORAB      | -0.0081244 | 1 |
| AK9        | -0.0334324 | 1 |
| SERBP1     | 0.1159249  | 1 |
| LBH        | -0.1010279 | 1 |
| CEP83      | -0.0285701 | 1 |
| STK26      | -0.0216828 | 1 |
| MED26      | 0.0041926  | 1 |
| PIGQ       | -0.0106492 | 1 |
| C9orf85    | 0.0148524  | 1 |
| STAR       | 0.0139722  | 1 |
| FAM221A    | -0.0093801 | 1 |
| HCP5       | 0.0139979  | 1 |
| ZBTB7B     | -0.019245  | 1 |
| AOAH       | 0.0031876  | 1 |
| VDAC2      | 0.0096362  | 1 |
| PFKFB3     | -0.0550641 | 1 |
| UGCG       | -0.007969  | 1 |
| EZR        | 0.0391111  | 1 |
| GPR180     | 0.008452   | 1 |
| SNX8       | 0.0186323  | 1 |
| SMPD2      | -0.0051765 | 1 |
| PAM        | 0.0211489  | 1 |
| BUB1       | 0.0225132  | 1 |
| RPL23A     | -0.0345757 | 1 |
| RPS27A     | 0.0325299  | 1 |
| ITGA6      | 0.0623046  | 1 |
| PDZD11     | 0.0054214  | 1 |
| RAB11B-AS1 | 0.0144651  | 1 |
| AC147067.1 | -0.0099383 | 1 |
| MAPK8IP3   | -0.0140365 | 1 |
| DHX30      | -0.0451074 | 1 |
| AL133523.1 | 0.0310796  | 1 |
| SNAPC1     | 0.0109     | 1 |
| MYLIP      | -0.0229858 | 1 |
| LINC01004  | -0.0143268 | 1 |
| SRRM2      | 0.0749892  | 1 |
| IKZF4      | 0.0171961  | 1 |
| DCLRE1B    | -0.0058778 | 1 |
| RIPK3      | -0.0045841 | 1 |
| NDUFC2     | -0.0311188 | 1 |
| PHACTR2    | -0.0106217 | 1 |
| CSTA       | -0.0362041 | 1 |
| CSNK1A1    | 0.0309691  | 1 |
| SRSF3      | 0.0230092  | 1 |



|            |            |   |
|------------|------------|---|
| HYLS1      | -0.041783  | 1 |
| SLFN5      | -0.0337635 | 1 |
| TLR4       | -0.0102065 | 1 |
| AC009962.1 | -0.0088883 | 1 |
| LIN7B      | -0.0223963 | 1 |
| PHIP       | -0.0399657 | 1 |
| Z95331.1   | -0.0049536 | 1 |
| ZNF189     | -0.0279543 | 1 |
| CTU2       | 0.0215255  | 1 |
| SYNJ1      | -0.013511  | 1 |
| BTN3A3     | -0.0140888 | 1 |
| C11orf95   | -0.0090274 | 1 |
| C7orf25    | -0.0063262 | 1 |
| SFXN2      | -0.0013173 | 1 |
| KMT5C      | 0.009792   | 1 |
| USP27X     | 0.0143403  | 1 |
| TCTA       | -0.0569986 | 1 |
| COG6       | -0.0315346 | 1 |
| WDFY4      | -0.0028986 | 1 |
| DIABLO     | -0.0067057 | 1 |
| AL049840.5 | -0.010869  | 1 |
| KLF11      | -0.0065021 | 1 |
| MVK        | -0.0012453 | 1 |
| UFC1       | 0.0299285  | 1 |
| GK         | -0.0257774 | 1 |
| AIMP1      | 0.0071905  | 1 |
| FIRRE      | 0.0337577  | 1 |
| STK39      | 0.0005081  | 1 |
| NDUFB4     | 0.0446278  | 1 |
| PRDM15     | 0.0090909  | 1 |
| ALDOC      | -0.0169098 | 1 |
| MRPS21     | 0.067808   | 1 |
| SLA        | 0.0550905  | 1 |
| MFSD6      | 0.0021661  | 1 |
| ATF7IP     | -0.0233266 | 1 |
| LYZ        | -0.0561914 | 1 |
| FBXO21     | 0.0178171  | 1 |
| LRRCC1     | 0.0402061  | 1 |
| AL645728.1 | 0.0228672  | 1 |
| P4HA1      | -0.0208093 | 1 |
| VPS13A     | -0.0321038 | 1 |
| ZCCHC4     | -0.0027322 | 1 |
| LINC00884  | 0.0030633  | 1 |
| C17orf75   | 0.0301649  | 1 |
| CABLES1    | -0.0027291 | 1 |
| RPL14      | 0.0570658  | 1 |
| AL359643.3 | -0.0060686 | 1 |
| NAA16      | -0.0183077 | 1 |
| VAMP1      | -0.0103223 | 1 |
| CCL5       | 0.028285   | 1 |

|            |            |   |
|------------|------------|---|
| MT-ND5     | 0.0947813  | 1 |
| MT-ND1     | 0.0242271  | 1 |
| PTAFR      | 0.0391762  | 1 |
| PLD6       | -0.0074242 | 1 |
| ENGASE     | -0.0019749 | 1 |
| IFT88      | 0.0309637  | 1 |
| FAAP24     | -0.0114349 | 1 |
| SRRM1      | -0.0677406 | 1 |
| HELLPAR    | -0.0046736 | 1 |
| AC015871.1 | -0.0023468 | 1 |
| RWDD1      | -0.0416896 | 1 |
| NOD1       | -0.0031865 | 1 |
| ZNF607     | 0.0126449  | 1 |
| SLC25A22   | 0.0038061  | 1 |
| ANTXR2     | 0.0166989  | 1 |
| WDCP       | 0.0027441  | 1 |
| ELOB       | 0.0231531  | 1 |
| LANCL2     | 0.0015088  | 1 |
| SLC25A45   | -0.0077615 | 1 |
| HOOK3      | 0.0310561  | 1 |
| SELENOH    | 0.0726163  | 1 |
| PPP1R3B    | -0.0103541 | 1 |
| ARPC1B     | 0.0454694  | 1 |
| TRIM69     | 0.0183622  | 1 |
| ZBED3-AS1  | 0.0134174  | 1 |
| KHDC1      | 0.0086388  | 1 |
| UBXN1      | -0.0038917 | 1 |
| PINX1      | 0.0086308  | 1 |
| ZNF142     | 0.0034455  | 1 |
| AL356804.1 | 0.058577   | 1 |
| HLA-DRB5   | 0.0650999  | 1 |
| MBNL1-AS1  | 0.0023753  | 1 |
| NACA       | -0.0059188 | 1 |
| ZNF25      | -0.0200267 | 1 |
| VAMP8      | -0.0705053 | 1 |
| ERP29      | -0.0188932 | 1 |
| LDHA       | 0.0640316  | 1 |
| PGK1       | 0.016354   | 1 |
| TEDC1      | 0.0163763  | 1 |
| AC040970.1 | 0.0101542  | 1 |
| BRPF3      | -0.0144781 | 1 |
| MAP1LC3A   | 0.0029574  | 1 |
| LAPTM4B    | 0.0036768  | 1 |
| MAP2K6     | -0.0092555 | 1 |
| TIGD6      | -0.0055703 | 1 |
| VIM-AS1    | 0.0018695  | 1 |
| C11orf24   | -0.0165889 | 1 |
| RBM25      | -0.010483  | 1 |
| HNRNPA1    | -0.0229583 | 1 |
| NSMF       | -0.0005224 | 1 |

|            |            |   |
|------------|------------|---|
| HIST1H2AG  | 0.0191281  | 1 |
| CCDC34     | 0.0558794  | 1 |
| POLR3G     | 0.0186508  | 1 |
| NYNRIN     | 0.018938   | 1 |
| ATP5MC2    | 0.0345476  | 1 |
| FAM126A    | -0.0263632 | 1 |
| TTYH2      | 0.0292923  | 1 |
| CCDC47     | -0.0224405 | 1 |
| PIGV       | 0.0078745  | 1 |
| USP51      | 0.0208984  | 1 |
| AMMECR1    | 0.0048166  | 1 |
| SEM1       | -0.0341541 | 1 |
| AC015982.2 | -0.0153769 | 1 |
| AP001505.1 | -0.011329  | 1 |
| BASP1      | -0.0126935 | 1 |
| VASP       | 0.0230375  | 1 |
| ENPP2      | 0.0506011  | 1 |
| ST6GAL1    | -0.0029593 | 1 |
| FKBPL      | 0.012853   | 1 |
| AC092944.1 | 0.0151368  | 1 |
| APEX1      | -0.0191561 | 1 |
| TMEM258    | -0.0305098 | 1 |
| C2CD2L     | -0.0083908 | 1 |
| ZNF280B    | -0.0019551 | 1 |
| PFDN5      | -0.0416982 | 1 |
| AC099778.1 | 0.0148969  | 1 |
| NR1D1      | 0.0044523  | 1 |
| HLA-DQA2   | 0.0162827  | 1 |
| LINC00173  | 0.0337422  | 1 |
| TALDO1     | -0.0532619 | 1 |
| LCMT2      | -0.0122375 | 1 |
| CHST10     | -0.0020151 | 1 |
| LYL1       | 0.0119346  | 1 |
| SLC27A1    | 0.0098815  | 1 |
| RAC1       | 0.0041745  | 1 |
| PPDPF      | -0.0269882 | 1 |
| PGM3       | -0.0169811 | 1 |
| S100A13    | 0.0009127  | 1 |
| CCDC77     | -0.0146544 | 1 |
| SMC4       | 0.1493751  | 1 |
| ACTR5      | 0.0011453  | 1 |
| ZNF584     | 0.0200826  | 1 |
| KIF3A      | 0.0097014  | 1 |
| RBIS       | -0.0661237 | 1 |
| RAMP1      | -0.033817  | 1 |
| CCDC26     | 0.0428682  | 1 |
| PDSS1      | 0.0003077  | 1 |
| SLC4A7     | 0.0095644  | 1 |
| HP1BP3     | -0.0062529 | 1 |
| WASF1      | -0.0028386 | 1 |

|            |            |   |
|------------|------------|---|
| JHY        | -0.0008835 | 1 |
| DANT2      | 0.002995   | 1 |
| BTG1       | -0.0074386 | 1 |
| AGAP3      | 0.0157564  | 1 |
| PTPN6      | -0.0964332 | 1 |
| CCT8       | 0.0518369  | 1 |
| YWHAB      | -0.0278315 | 1 |
| HNRNPU     | 0.1141141  | 1 |
| RTF1       | 0.0501249  | 1 |
| DXO        | 0.0163255  | 1 |
| AC246817.2 | 0.0078271  | 1 |
| C1orf112   | -0.0079741 | 1 |
| AKAP9      | -0.082341  | 1 |
| ITM2A      | 0.0096253  | 1 |
| LINC00923  | 0.0100028  | 1 |
| ICK        | -0.0066333 | 1 |
| CCDC169    | 0.0038479  | 1 |
| PDCD2L     | 0.0089101  | 1 |
| GSTO1      | 0.015538   | 1 |
| GCC2       | -0.0399101 | 1 |
| ATP5F1B    | 0.0541852  | 1 |
| NAGA       | 0.014996   | 1 |
| GIN1       | -0.0200973 | 1 |
| CALCRL     | -0.0268031 | 1 |
| SRD5A3     | 0.0170731  | 1 |
| GPN2       | -0.0197469 | 1 |
| IQGAP1     | 0.0331872  | 1 |
| TRMT9B     | -0.0173565 | 1 |
| SLC4A2     | -0.001775  | 1 |
| UBL5       | -0.0321791 | 1 |
| CALM2      | 0.0345653  | 1 |
| TCEAL3     | -0.0084451 | 1 |
| IER5L      | 0.0017281  | 1 |
| EIF3F      | -0.0144044 | 1 |
| NEFH       | 0.0162014  | 1 |
| GBP5       | 0.0057359  | 1 |
| HLA-DMB    | 0.0271872  | 1 |
| GPR141     | -0.0013914 | 1 |
| ECH1       | 0.015058   | 1 |
| ATP5MD     | -0.0323683 | 1 |
| RNF144B    | 0.0146749  | 1 |
| SUB1       | 0.0348576  | 1 |
| DSCC1      | 0.0078551  | 1 |
| POGLUT2    | 0.014718   | 1 |
| KANSL1-AS1 | -0.0026731 | 1 |
| CEP290     | 0.0129735  | 1 |
| GABARAP    | -0.0552718 | 1 |
| RPL36      | -0.0285494 | 1 |
| TPT1       | -0.0235706 | 1 |
| STK19      | -0.009052  | 1 |

|            |            |   |
|------------|------------|---|
| HLCS       | -0.0030989 | 1 |
| ZBTB17     | -0.0070508 | 1 |
| FNIP2      | 0.0057553  | 1 |
| RPP25      | 0.0194505  | 1 |
| HIST1H4C   | 0.2380557  | 1 |
| LRRFIP1    | 0.0283794  | 1 |
| CKB        | 0.0121438  | 1 |
| ARF4-AS1   | -0.0164341 | 1 |
| PHLDA1     | 0.0104982  | 1 |
| SRR        | 0.0115579  | 1 |
| CEP97      | 0.000973   | 1 |
| POFUT2     | -0.0005189 | 1 |
| NPM1       | 0.0796596  | 1 |
| SND1-IT1   | -0.0082219 | 1 |
| PTMS       | 0.0250804  | 1 |
| VWA1       | 0.0290739  | 1 |
| AVEN       | -0.0211505 | 1 |
| MFGE8      | 0.0292374  | 1 |
| LRRRC8A    | -0.0077316 | 1 |
| MBNL1      | -0.0543194 | 1 |
| DBF4B      | -0.0030876 | 1 |
| AC002467.1 | -0.0191005 | 1 |
| CLDN10     | 0.0333366  | 1 |
| CTBS       | -0.007659  | 1 |
| IL18       | 0.1039681  | 1 |
| CYSLTR2    | -0.0114727 | 1 |
| LINC01515  | 0.0192699  | 1 |
| STARD7-AS  | -0.0168252 | 1 |
| LFNG       | 0.0351124  | 1 |
| CCSER1     | -0.0074665 | 1 |
| TMEM201    | -0.0026923 | 1 |
| ZNF710     | -0.0158322 | 1 |
| GALM       | -0.041965  | 1 |
| SLC16A1-AS | 0.0446236  | 1 |
| PRMT6      | 0.0160373  | 1 |
| RPL11      | -0.0214836 | 1 |
| PITPNC1    | 0.0037112  | 1 |
| TRAF3IP1   | -0.0216934 | 1 |
| GABPB1-AS  | -0.0080545 | 1 |
| B2M        | 0.033424   | 1 |
| YTHDC2     | -0.0038812 | 1 |
| ATP6V0E1   | 0.0195764  | 1 |
| STX2       | -0.004411  | 1 |
| ZNF143     | -0.0188306 | 1 |
| CCDC15     | -0.0169349 | 1 |
| DNAJC1     | 0.0622044  | 1 |
| BRI3       | -0.0149592 | 1 |
| LMNA       | -0.0014177 | 1 |
| POLR2L     | -0.0185851 | 1 |
| GOLGB1     | -0.019971  | 1 |

|            |            |   |
|------------|------------|---|
| BAIAP2     | -0.0372325 | 1 |
| MSI2       | -0.0559181 | 1 |
| ATP5PO     | 0.0243364  | 1 |
| MMD        | 0.0107517  | 1 |
| PARP16     | -7.042E-05 | 1 |
| SEC61B     | 0.0152592  | 1 |
| TCEA1      | 0.0165534  | 1 |
| PNN        | 0.0316459  | 1 |
| GNB1L      | 0.0004253  | 1 |
| UBA52      | 0.0078797  | 1 |
| SAP18      | 0.0476449  | 1 |
| PRELID1    | 0.0083979  | 1 |
| AMDHD2     | 0.0248703  | 1 |
| COX6A1     | -0.0403503 | 1 |
| ZBTB39     | 0.0008129  | 1 |
| CST3       | 0.0412744  | 1 |
| CTSH       | -0.0431248 | 1 |
| AFF3       | 0.0158999  | 1 |
| TOMM20     | 0.0133759  | 1 |
| AL050341.2 | -0.002966  | 1 |
| RPS25      | -0.03398   | 1 |
| PRSS57     | -0.0277351 | 1 |
| SNRPD2     | -0.0289128 | 1 |
| RPL23      | 0.0500212  | 1 |
| POP1       | 0.0086335  | 1 |
| CCDC112    | 0.0260226  | 1 |
| CDK6       | -0.0642994 | 1 |
| RPL21      | 0.0371859  | 1 |
| HLA-B      | 0.1085008  | 1 |
| GAS2       | -0.0250117 | 1 |
| SFMBT2     | 0.0138321  | 1 |
| P2RY1      | 0.0293157  | 1 |
| ARPC3      | -0.018789  | 1 |
| AL358780.1 | -0.003044  | 1 |
| AL360012.1 | 0.0177284  | 1 |
| SRSF8      | -0.0070438 | 1 |
| C11orf58   | -0.0401114 | 1 |
| PUS7L      | -0.0226638 | 1 |
| BANK1      | 0.0186315  | 1 |
| SRSF5      | 0.0577991  | 1 |
| MIR4453HG  | -0.0047429 | 1 |
| SERP1      | 0.0222933  | 1 |
| PLB1       | 0.0205407  | 1 |
| HLA-DQA1   | 0.0048432  | 1 |
| DENND5B    | -0.0095961 | 1 |
| SLC27A4    | -0.0082527 | 1 |
| HERC5      | 0.0020723  | 1 |
| LUC7L3     | -0.0188073 | 1 |
| RPS13      | 0.0060482  | 1 |
| CPA3       | -0.0038542 | 1 |

|            |            |   |
|------------|------------|---|
| HAUS8      | 0.0009958  | 1 |
| MT-ND6     | 0.0475949  | 1 |
| TMEM123    | -0.0463647 | 1 |
| AC091271.1 | 0.0257747  | 1 |
| ARHGDIB    | -0.0304505 | 1 |
| HIST2H2BF  | -0.0216758 | 1 |
| RACK1      | 0.0387841  | 1 |
| C9orf16    | 0.0274012  | 1 |
| NAP1L1     | -0.0007142 | 1 |
| LGALS1     | -0.0559139 | 1 |
| SUMO2      | 0.0838156  | 1 |
| UQCR11     | 0.0282192  | 1 |
| NQO1       | -0.0054465 | 1 |
| HMG5       | -0.0144757 | 1 |
| ZFP36L2    | 0.0716183  | 1 |
| ZFX3       | -0.0182783 | 1 |
| DOK2       | -0.0143143 | 1 |
| POLR1D     | 0.0185741  | 1 |
| HGH1       | 0.0127954  | 1 |
| RPL24      | 0.0086131  | 1 |
| FAU        | -0.0251454 | 1 |
| RSL24D1    | -0.058491  | 1 |
| NDUFA4     | -0.0501998 | 1 |
| CCNI       | -0.0229572 | 1 |
| IL13RA1    | -0.0235088 | 1 |
| ATP6V1G1   | -0.0072954 | 1 |
| RPL26      | 0.0096471  | 1 |
| TAGLN2     | -0.0085479 | 1 |
| RPL22L1    | 0.0094407  | 1 |
| NOP53      | 0.0131499  | 1 |
| RPL7       | 0.0204999  | 1 |
| RPS3A      | -0.0105505 | 1 |
| SLC9A1     | 0.0067296  | 1 |
| EIF4A2     | 0.0225406  | 1 |
| AC069185.1 | -0.0112805 | 1 |
| SYNJ2      | -0.0024185 | 1 |
| RPS17      | 0.0037707  | 1 |
| UQCRH      | 0.0256837  | 1 |
| OSTC       | -0.0080112 | 1 |
| ATP5PF     | 0.0230053  | 1 |
| COMT       | 0.0213853  | 1 |
| SRP14      | -0.0336582 | 1 |
| BTF3       | 0.0541633  | 1 |
| RHOB       | -0.0129555 | 1 |
| RPL36AL    | 0.0284769  | 1 |
| UBB        | -0.0157248 | 1 |
| ARPC2      | -0.0348333 | 1 |
| EEF1A1     | 0.0180658  | 1 |
| SERPINB1   | -0.0061256 | 1 |
| RSPH3      | 0.0101571  | 1 |

|            |            |   |
|------------|------------|---|
| RSL1D1     | 0.0609817  | 1 |
| TEX9       | 0.005764   | 1 |
| SERPINI1   | -0.0213082 | 1 |
| DDX17      | -0.0047254 | 1 |
| S100A10    | 0.0152342  | 1 |
| AL157895.1 | -0.084611  | 1 |
| ABRACL     | -0.0040396 | 1 |
| ARGLU1     | 0.0458557  | 1 |
| PRRC2C     | -0.0171143 | 1 |
| RPL35      | 0.0200478  | 1 |
| PFN1       | 0.0030059  | 1 |
| FXYD5      | -0.0196299 | 1 |
| HNRNPC     | 0.0078814  | 1 |
| FGL2       | -0.0600085 | 1 |
| HMGA1      | -0.0126186 | 1 |
| COX8A      | -0.0191155 | 1 |
| SLC25A5    | 0.0284587  | 1 |
| MYOF       | 0.0033097  | 1 |
| RPS12      | 0.0013285  | 1 |
| TMSB10     | -0.0251127 | 1 |
| MT-CO2     | 0.0039174  | 1 |
| MT-ND3     | 0.0025674  | 1 |
| CFL1       | 0.0076509  | 1 |



· cells after niche-like culture versus after standard culture (reference). Only genes exp





























































































































































































































































































































































































































































































expressed in >10% of single cells are reported. Log2 Fold Change (FC) and FDR-adjusted































































































































































































































































































































































































































































































**p-value.**
