# Supplementary material for: A multiparametric niche-like drug screening platform in acute myeloid leukemia
Source: PubMed Central journal article supplement (PMC9232632; doi:10.1038/s41408-022-00689-3), 2022-06-24
Supplement: 41408_2022_689_MOESM3_ESM.pdf [file 41408_2022_689_MOESM3_ESM.pdf]

DNR-AraC Screen (Figure 5)

Plate\_1

|  |                               |                                |                                   |                                     |                                       |                                         |                                       |                                     |                                  |                                 |  |
|--|-------------------------------|--------------------------------|-----------------------------------|-------------------------------------|---------------------------------------|-----------------------------------------|---------------------------------------|-------------------------------------|----------------------------------|---------------------------------|--|
|  |                               |                                |                                   |                                     |                                       |                                         |                                       |                                     |                                  |                                 |  |
|  | DNR 2 + ARAC 40               | DNR 0.2 + ARAC 4               | DNR 0.02 + ARAC 0.4               | DNR 0.002 + ARAC 0.04               | DNR 0.0002 + ARAC 0.004               | DNR 0.0002 + ARAC 0.004 + PANO 0.002    | DNR 0.002 + ARAC 0.04 + PANO 0.002    | DNR 0.02 + ARAC 0.4 + PANO 0.002    | DNR 0.2 + ARAC 4 + PANO 0.002    | DNR 2 + ARAC 40 + PANO 0.002    |  |
|  | DNR 2 + ARAC 40 + GLASDE 0.01 | DNR 0.2 + ARAC 4 + GLASDE 0.01 | DNR 0.02 + ARAC 0.4 + GLASDE 0.01 | DNR 0.002 + ARAC 0.04 + GLASDE 0.01 | DNR 0.0002 + ARAC 0.004 + GLASDE 0.01 | DNR 0.0002 + ARAC 0.004 + OTX015 0.02   | DNR 0.002 + ARAC 0.04 + OTX015 0.02   | DNR 0.02 + ARAC 0.4 + OTX015 0.02   | DNR 0.2 + ARAC 4 + OTX015 0.02   | DNR 2 + ARAC 40 + OTX015 0.02   |  |
|  | DNR 2 + ARAC 40 + VEN 0.04    | DNR 0.2 + ARAC 4 + VEN 0.04    | DNR 0.02 + ARAC 0.4 + VEN 0.04    | DNR 0.002 + ARAC 0.04 + VEN 0.04    | DNR 0.0002 + ARAC 0.004 + VEN 0.04    | DNR 0.0002 + ARAC 0.004 + RUXO 0.26     | DNR 0.002 + ARAC 0.04 + RUXO 0.26     | DNR 0.02 + ARAC 0.4 + RUXO 0.26     | DNR 0.2 + ARAC 4 + RUXO 0.26     | DNR 2 + ARAC 40 + RUXO 0.26     |  |
|  | DNR 2 + ARAC 40 + MIDO 0.8    | DNR 0.2 + ARAC 4 + MIDO 0.8    | DNR 0.02 + ARAC 0.4 + MIDO 0.8    | DNR 0.002 + ARAC 0.04 + MIDO 0.8    | DNR 0.0002 + ARAC 0.004 + MIDO 0.8    | DNR 0.0002 + ARAC 0.004 + SEL 0.4       | DNR 0.002 + ARAC 0.04 + SEL 0.4       | DNR 0.02 + ARAC 0.4 + SEL 0.4       | DNR 0.2 + ARAC 4 + SEL 0.4       | DNR 2 + ARAC 40 + SEL 0.4       |  |
|  | DNR 2 + ARAC 40 + AG221 6     | DNR 0.2 + ARAC 4 + AG221 6     | DNR 0.02 + ARAC 0.4 + AG221 6     | DNR 0.002 + ARAC 0.04 + AG221 6     | DNR 0.0002 + ARAC 0.004 + AG221 6     | DNR 0.0002 + ARAC 0.004 + ACT_D 0.004   | DNR 0.002 + ARAC 0.04 + ACT_D 0.004   | DNR 0.02 + ARAC 0.4 + ACT_D 0.004   | DNR 0.2 + ARAC 4 + ACT_D 0.004   | DNR 2 + ARAC 40 + ACT_D 0.004   |  |
|  | DNR 2 + ARAC 40 + IVO 0.34    | DNR 0.2 + ARAC 4 + IVO 0.34    | DNR 0.02 + ARAC 0.4 + IVO 0.34    | DNR 0.002 + ARAC 0.04 + IVO 0.34    | DNR 0.0002 + ARAC 0.004 + IVO 0.34    | DNR 0.0002 + ARAC 0.004 + S63845 0.0034 | DNR 0.002 + ARAC 0.04 + S63845 0.0034 | DNR 0.02 + ARAC 0.4 + S63845 0.0034 | DNR 0.2 + ARAC 4 + S63845 0.0034 | DNR 2 + ARAC 40 + S63845 0.0034 |  |
|  |                               |                                |                                   |                                     | DMSO                                  | DMSO                                    |                                       |                                     |                                  |                                 |  |

Plate\_2

|  |                               |                                |                                   |                                     |                                       |                                     |                                   |                                 |                              |                             |  |
|--|-------------------------------|--------------------------------|-----------------------------------|-------------------------------------|---------------------------------------|-------------------------------------|-----------------------------------|---------------------------------|------------------------------|-----------------------------|--|
|  |                               |                                |                                   |                                     |                                       |                                     |                                   |                                 |                              |                             |  |
|  | DNR 2 + ARAC 40 + IDASA 0.048 | DNR 0.2 + ARAC 4 + IDASA 0.048 | DNR 0.02 + ARAC 0.4 + IDASA 0.048 | DNR 0.002 + ARAC 0.04 + IDASA 0.048 | DNR 0.0002 + ARAC 0.004 + IDASA 0.048 | DNR 0.0002 + ARAC 0.004 + DABRA 1.5 | DNR 0.002 + ARAC 0.04 + DABRA 1.5 | DNR 0.02 + ARAC 0.4 + DABRA 1.5 | DNR 0.2 + ARAC 4 + DABRA 1.5 | DNR 2 + ARAC 40 + DABRA 1.5 |  |
|  | DNR 2 + ARAC 40 + DACTO 0.34  | DNR 0.2 + ARAC 4 + DACTO 0.34  | DNR 0.02 + ARAC 0.4 + DACTO 0.34  | DNR 0.002 + ARAC 0.04 + DACTO 0.34  | DNR 0.0002 + ARAC 0.004 + DACTO 0.34  | DNR 0.0002 + ARAC 0.004 + GILTE 0.1 | DNR 0.002 + ARAC 0.04 + GILTE 0.1 | DNR 0.02 + ARAC 0.4 + GILTE 0.1 | DNR 0.2 + ARAC 4 + GILTE 0.1 | DNR 2 + ARAC 40 + GILTE 0.1 |  |
|  | DNR 2 + ARAC 40 + UPRO 0.14   | DNR 0.2 + ARAC 4 + UPRO 0.14   | DNR 0.02 + ARAC 0.4 + UPRO 0.14   | DNR 0.002 + ARAC 0.04 + UPRO 0.14   | DNR 0.0002 + ARAC 0.004 + UPRO 0.14   | DNR 0.0002 + ARAC 0.004 + MI-2 2    | DNR 0.002 + ARAC 0.04 + MI-2 2    | DNR 0.02 + ARAC 0.4 + MI-2 2    | DNR 0.2 + ARAC 4 + MI-2 2    | DNR 2 + ARAC 40 + MI-2 2    |  |
|  | DNR 2 + ARAC 40 + OLA 0.012   | DNR 0.2 + ARAC 4 + OLA 0.012   | DNR 0.02 + ARAC 0.4 + OLA 0.012   | DNR 0.002 + ARAC 0.04 + OLA 0.012   | DNR 0.0002 + ARAC 0.004 + OLA 0.012   | DNR 0.0002 + ARAC 0.004 + EPZ 2     | DNR 0.002 + ARAC 0.04 + EPZ 2     | DNR 0.02 + ARAC 0.4 + EPZ 2     | DNR 0.2 + ARAC 4 + EPZ 2     | DNR 2 + ARAC 40 + EPZ 2     |  |
|  | DNR 2 + ARAC 40 + PALBO 0.02  | DNR 0.2 + ARAC 4 + PALBO 0.02  | DNR 0.02 + ARAC 0.4 + PALBO 0.02  | DNR 0.002 + ARAC 0.04 + PALBO 0.02  | DNR 0.0002 + ARAC 0.004 + PALBO 0.02  | DNR 0.0002 + ARAC 0.004 + ATRA 1.6  | DNR 0.002 + ARAC 0.04 + ATRA 1.6  | DNR 0.02 + ARAC 0.4 + ATRA 1.6  | DNR 0.2 + ARAC 4 + ATRA 1.6  | DNR 2 + ARAC 40 + ATRA 1.6  |  |
|  | DNR 2 + ARAC 40 + ULIX 0.56   | DNR 0.2 + ARAC 4 + ULIX 0.56   | DNR 0.02 + ARAC 0.4 + ULIX 0.56   | DNR 0.002 + ARAC 0.04 + ULIX 0.56   | DNR 0.0002 + ARAC 0.004 + ULIX 0.56   | DNR 0.0002 + ARAC 0.004 + CRENO 0.1 | DNR 0.002 + ARAC 0.04 + CRENO 0.1 | DNR 0.02 + ARAC 0.4 + CRENO 0.1 | DNR 0.2 + ARAC 4 + CRENO 0.1 | DNR 2 + ARAC 40 + CRENO 0.1 |  |
|  |                               |                                |                                   |                                     | DMSO                                  | DMSO                                |                                   |                                 |                              |                             |  |
